# Supplementary material
Source: PubMed Central journal article supplement (PMC7405761)
Supplement: NIHMS1606876-supplement-Supplementary_Figures_1-14.pdf [file NIHMS1606876-supplement-Supplementary_Figures_1-14.pdf]

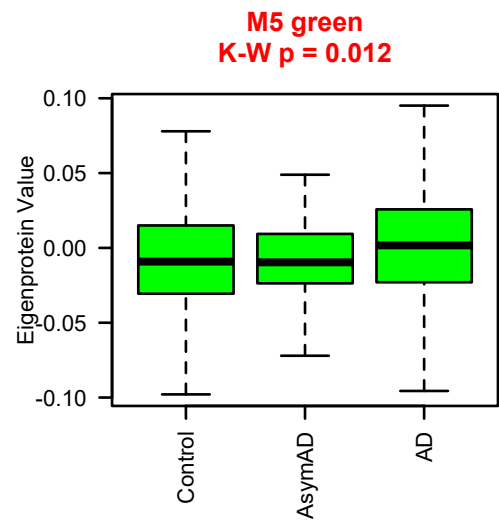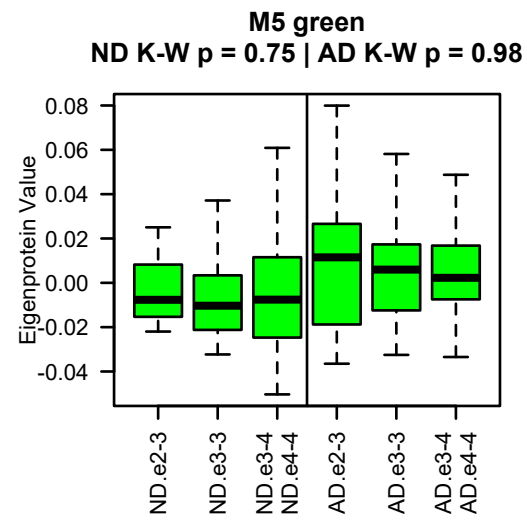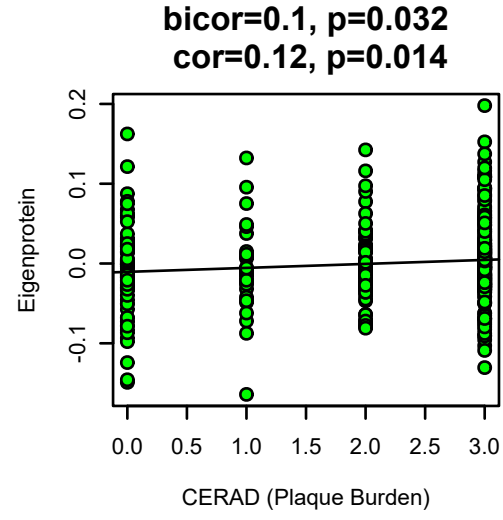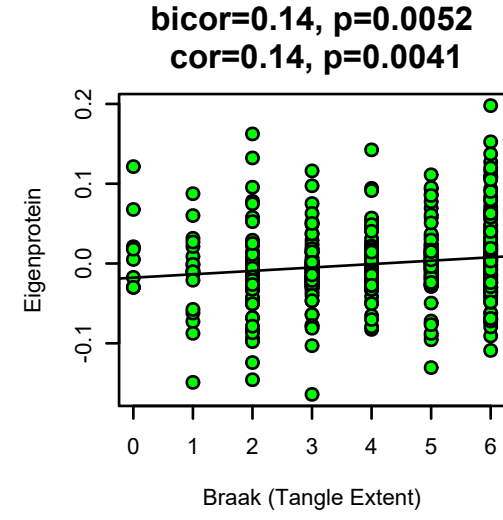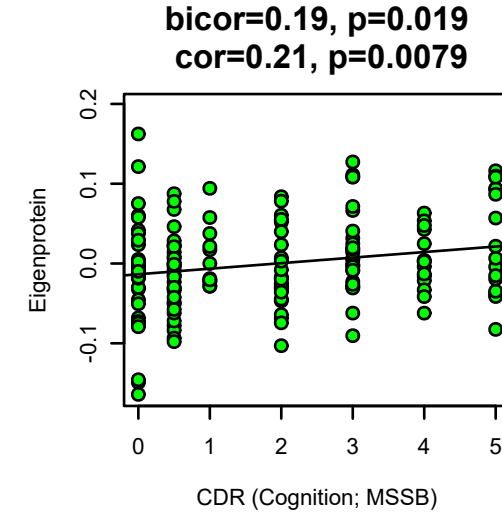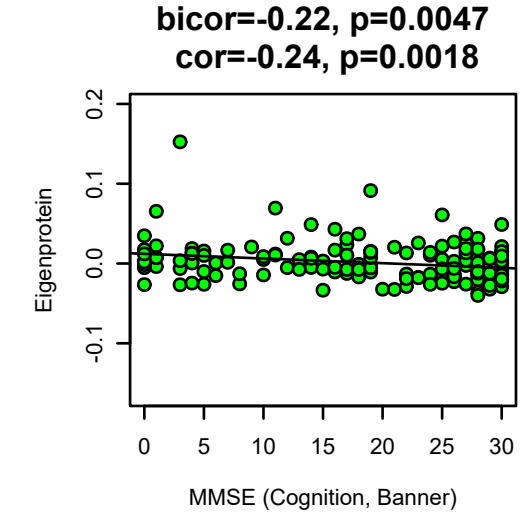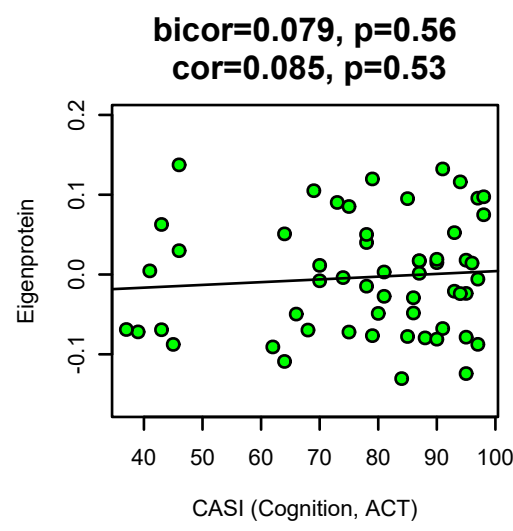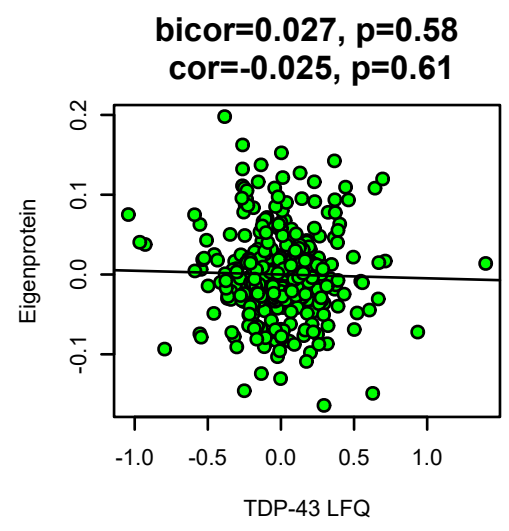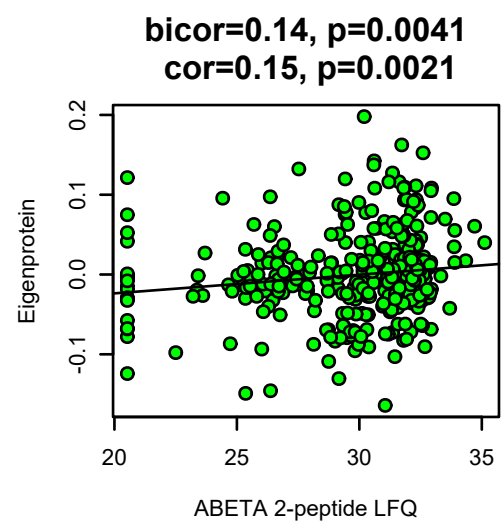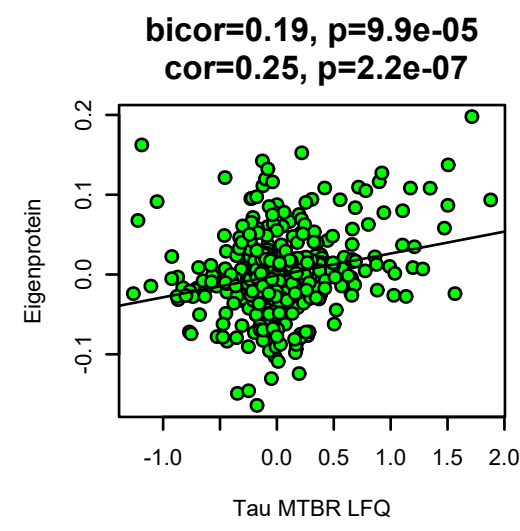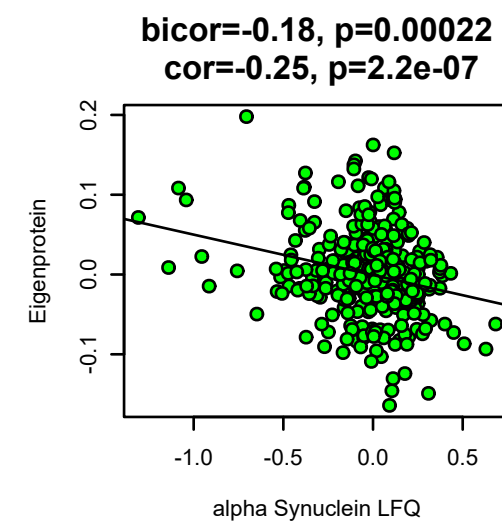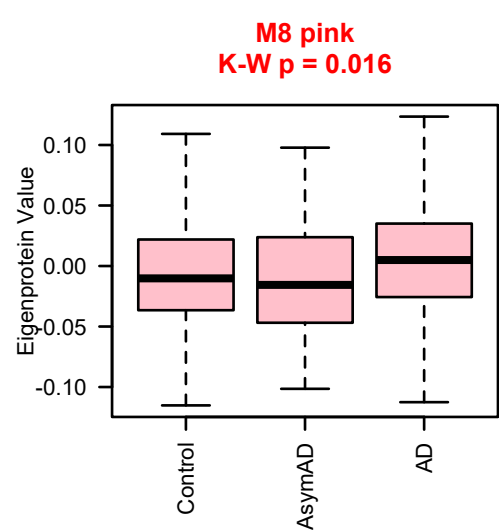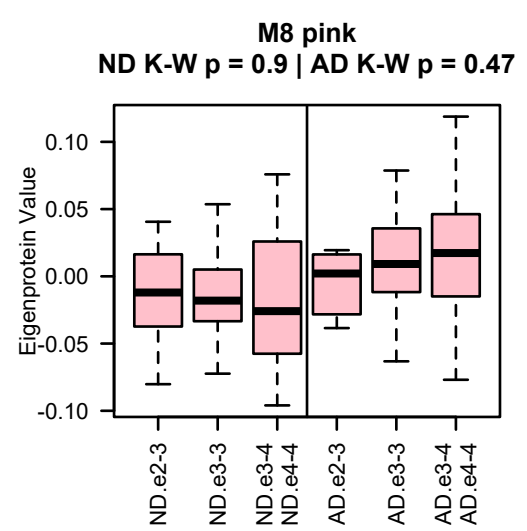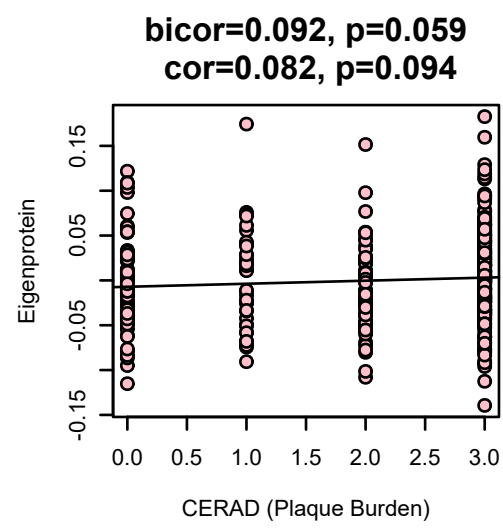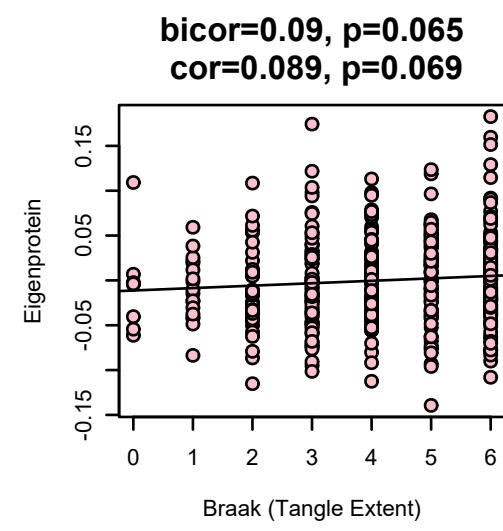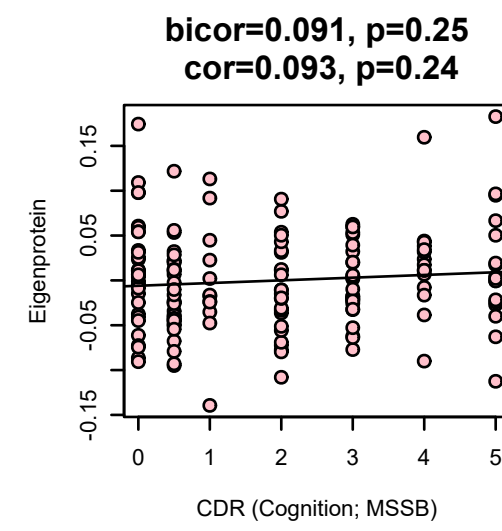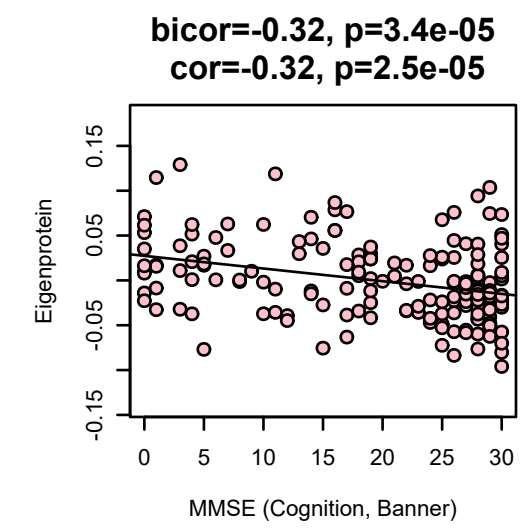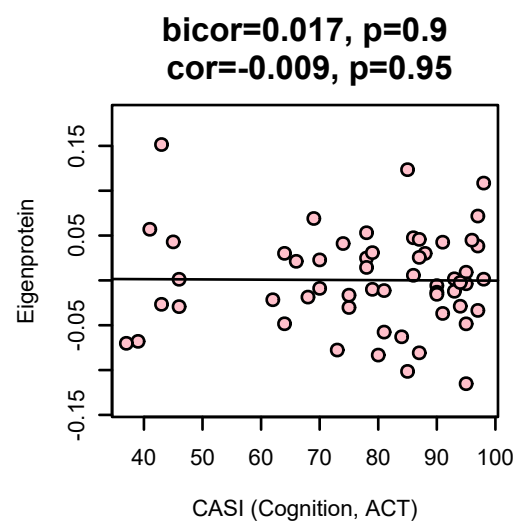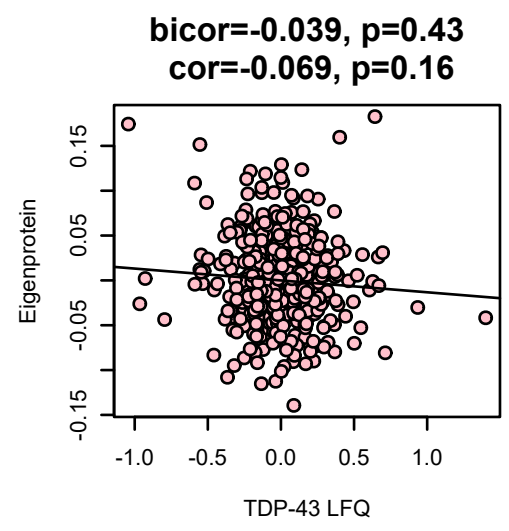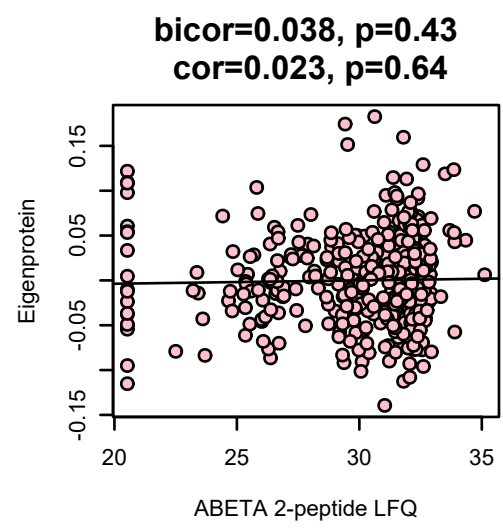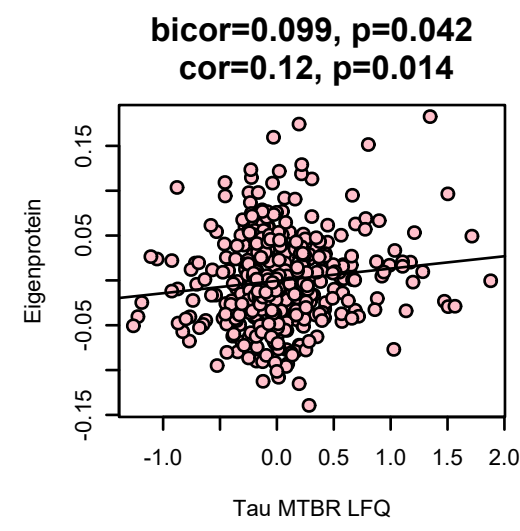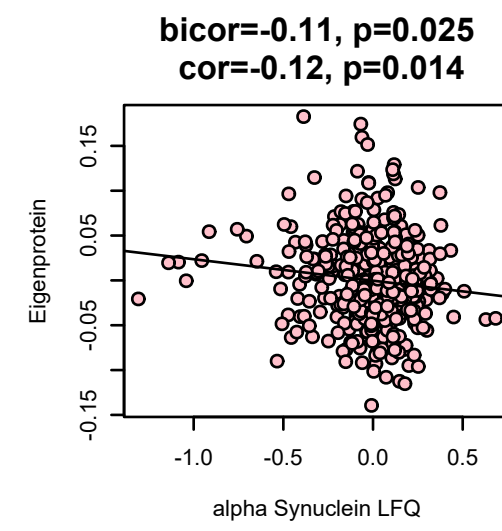

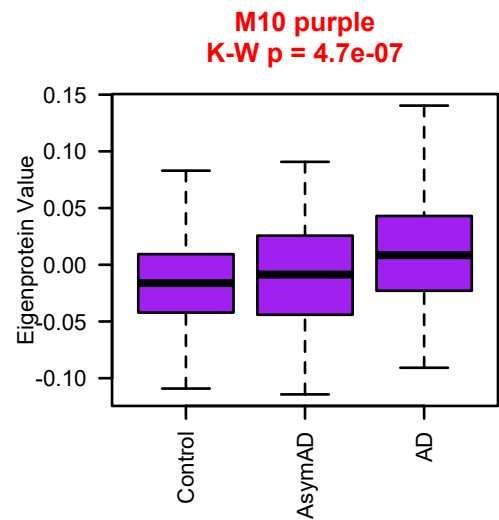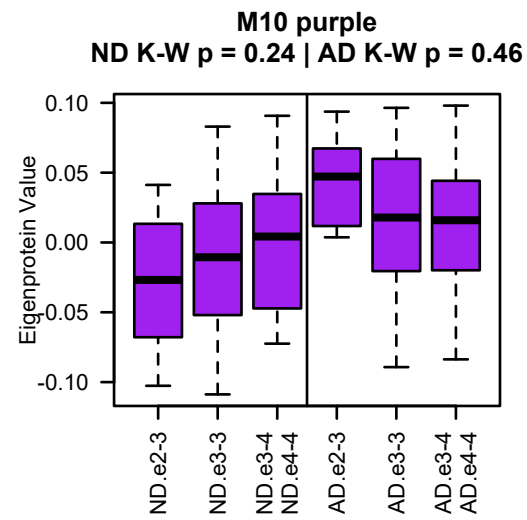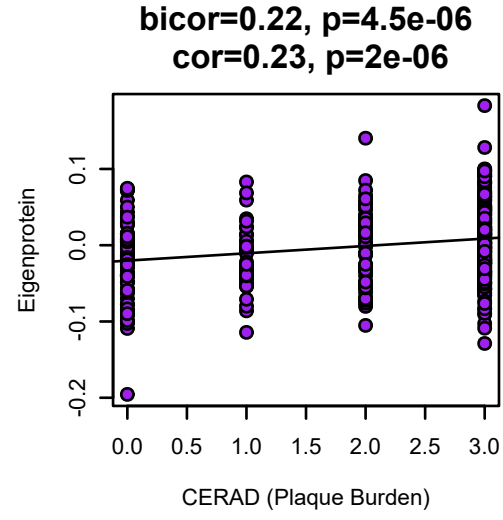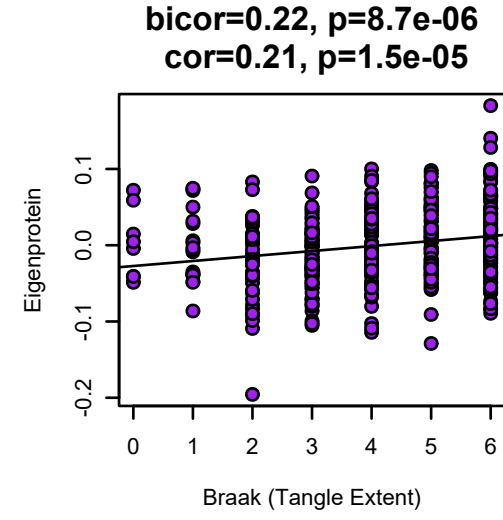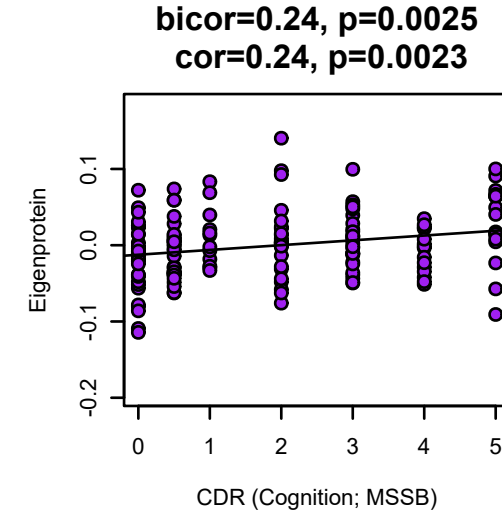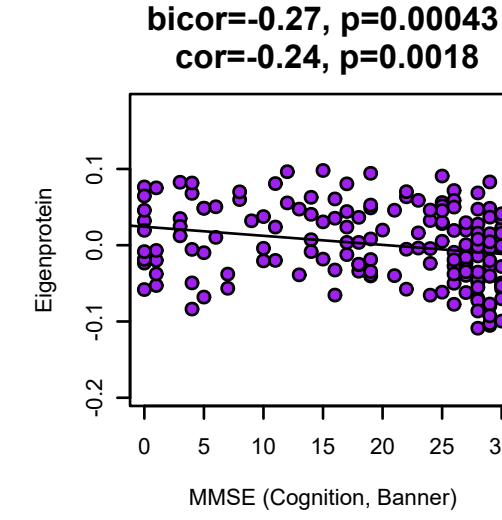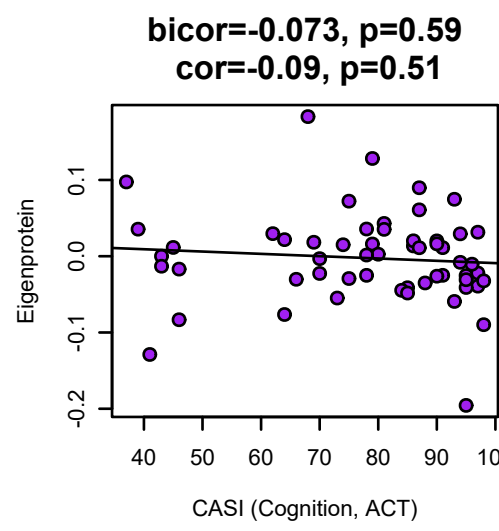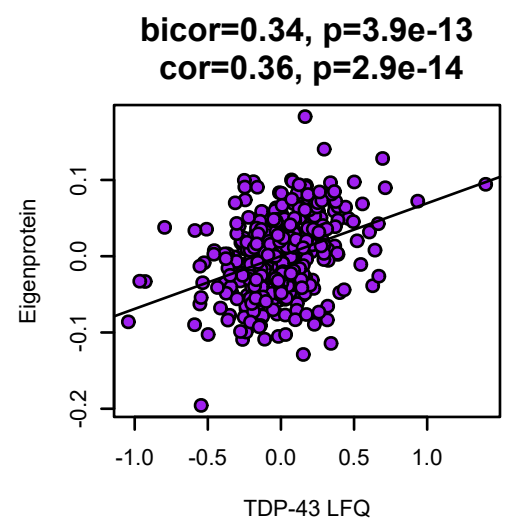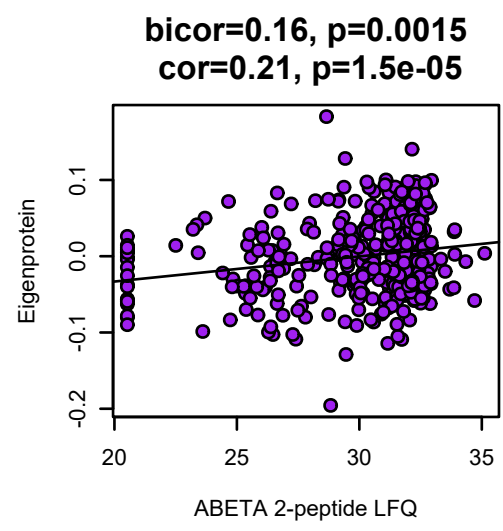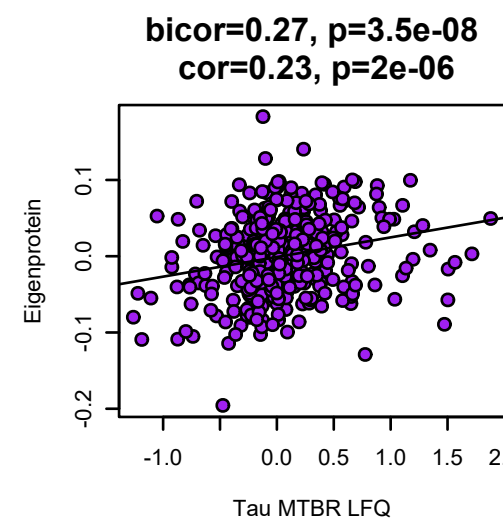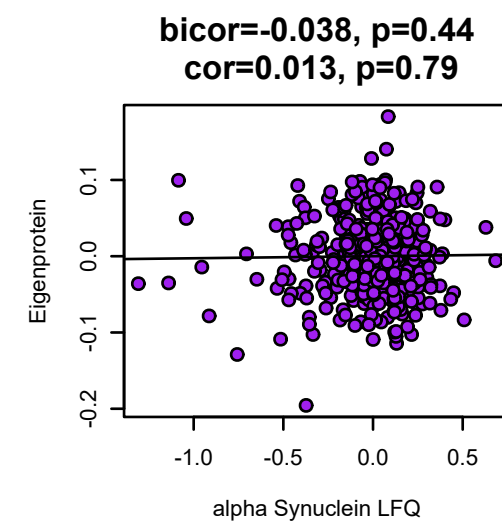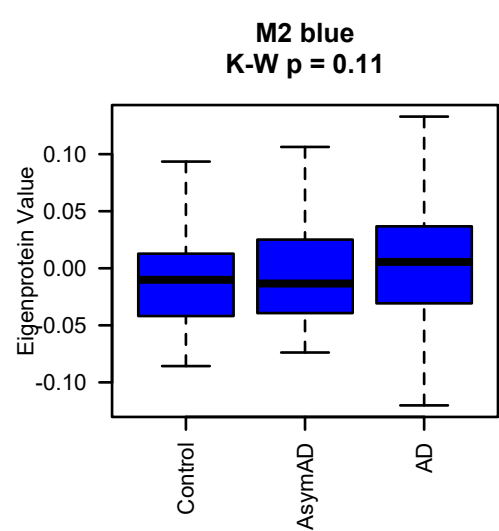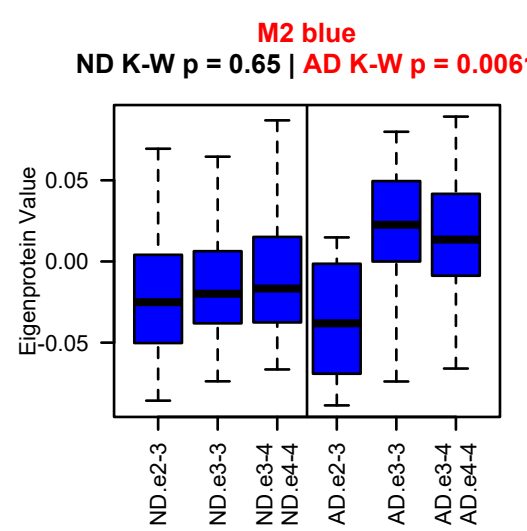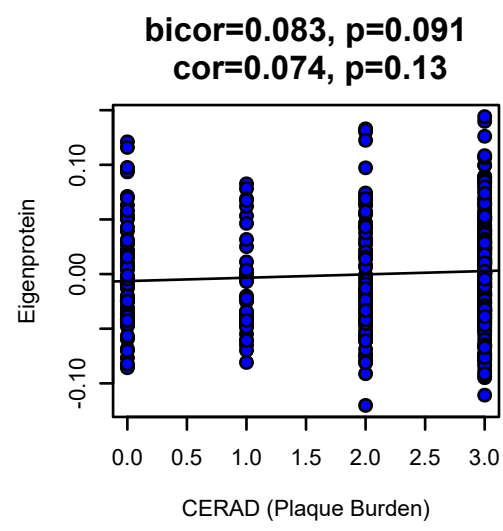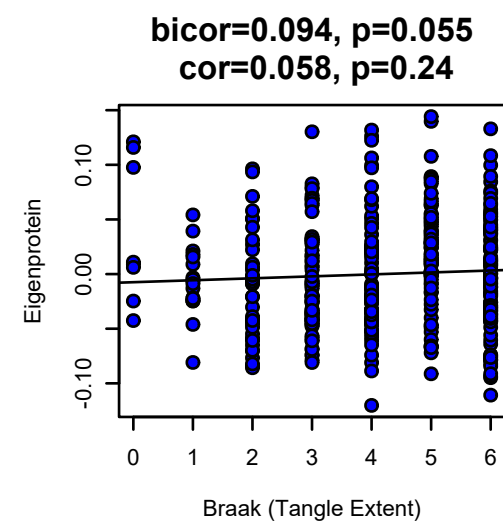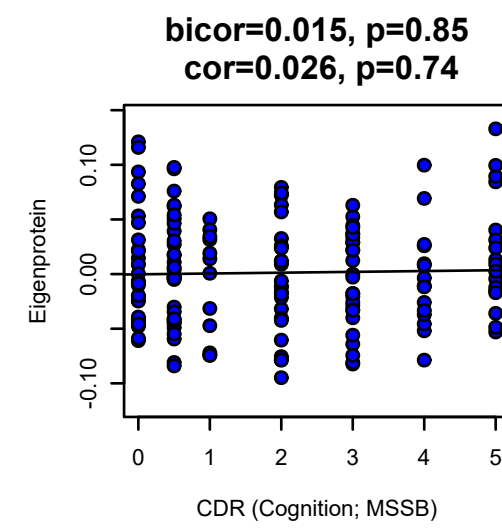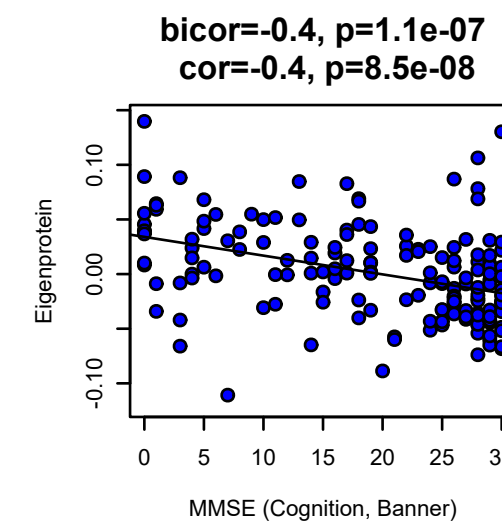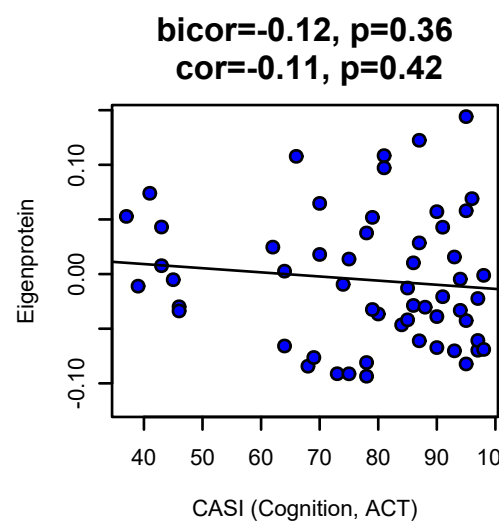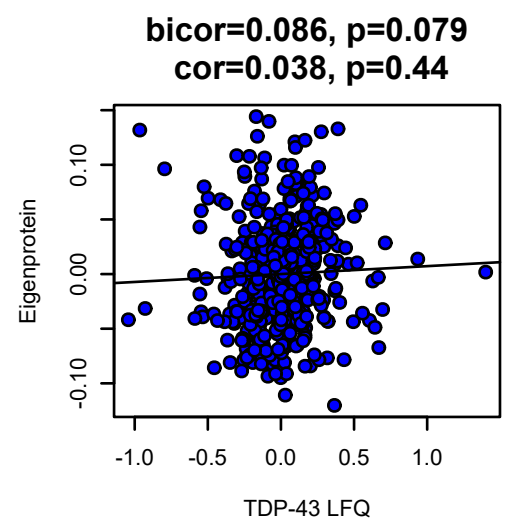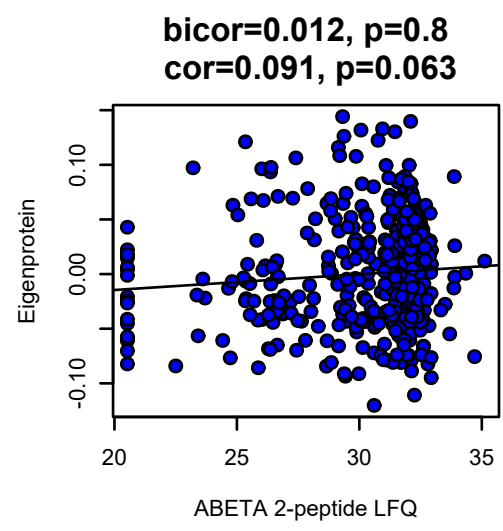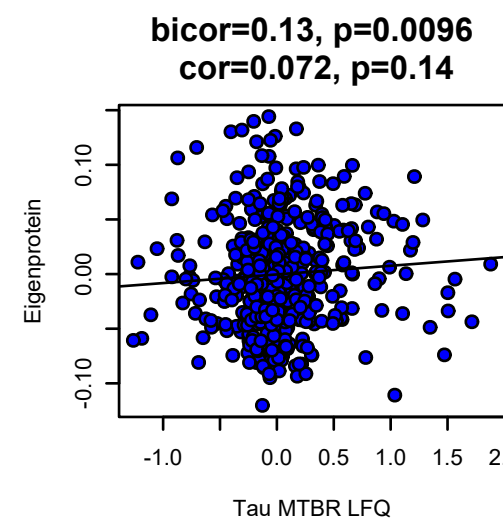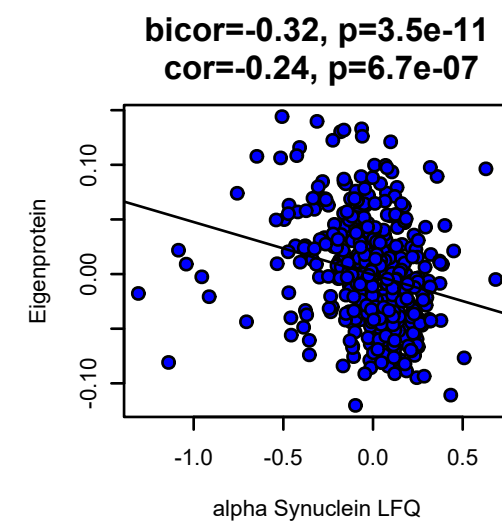

**M4 yellow**  
K-W  $p = 4.6e-28$

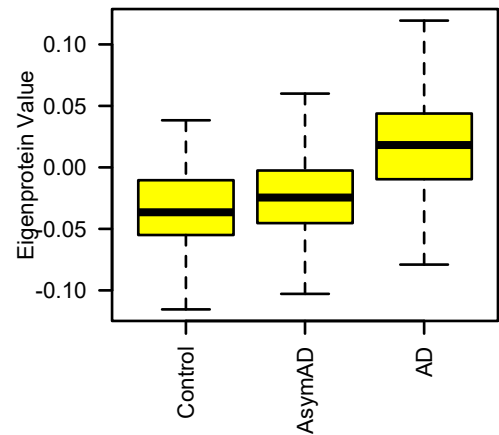

**M4 yellow**  
ND K-W  $p = 0.84$  | AD K-W  $p = 0.32$

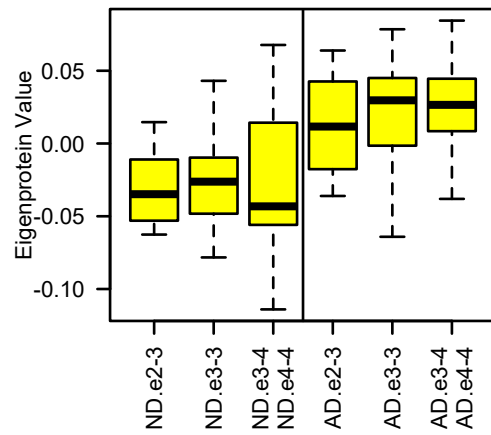

**bicor=0.46,  $p=1.3e-23$**   
**cor=0.44,  $p=2.9e-21$**

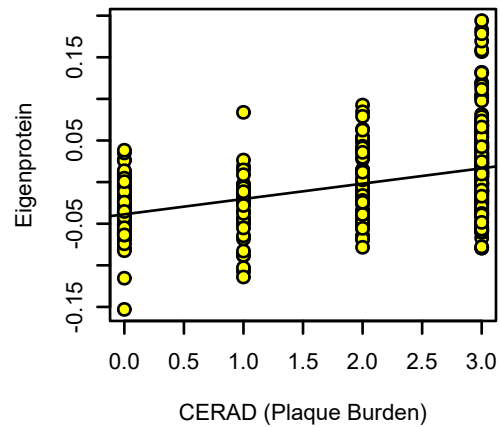

**bicor=0.49,  $p=4.7e-27$**   
**cor=0.46,  $p=2.5e-23$**

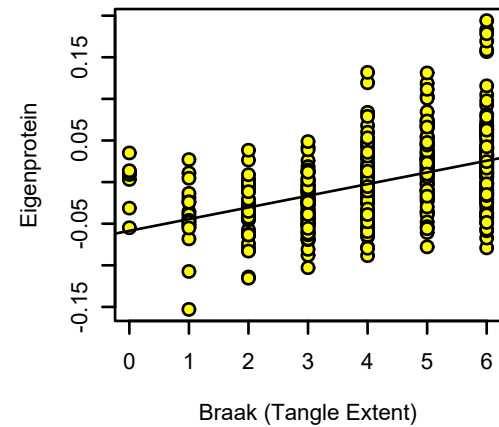

**bicor=0.52,  $p=2.6e-12$**   
**cor=0.53,  $p=6.8e-13$**

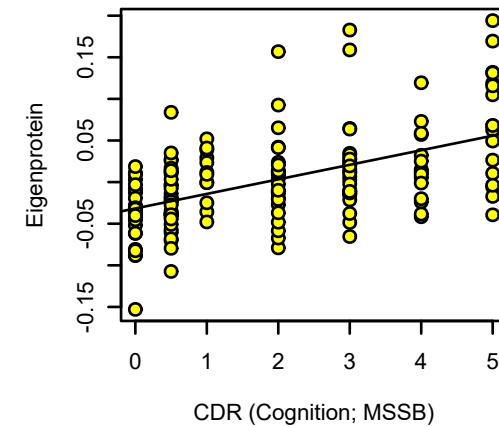

**bicor=-0.67,  $p=8.5e-23$**   
**cor=-0.67,  $p=4.1e-23$**

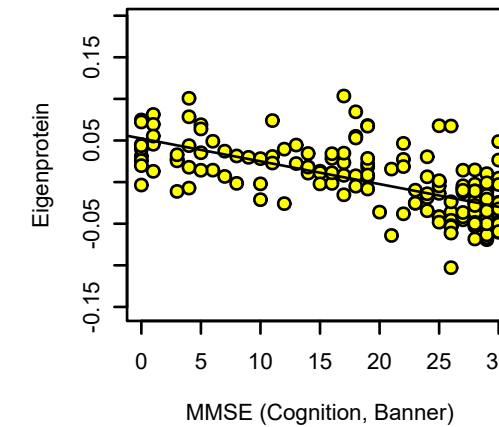

**bicor=-0.48,  $p=0.00021$**   
**cor=-0.47,  $p=0.00026$**

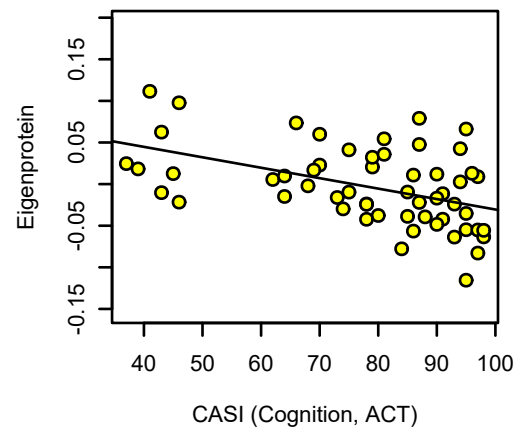

**bicor=0.17,  $p=0.00047$**   
**cor=0.13,  $p=0.0077$**

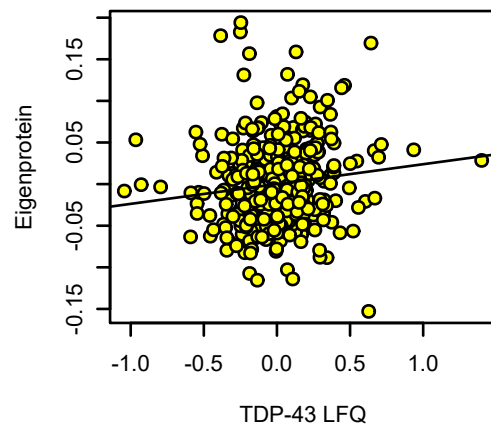

**bicor=0.29,  $p=2.3e-09$**   
**cor=0.37,  $p=4.9e-15$**

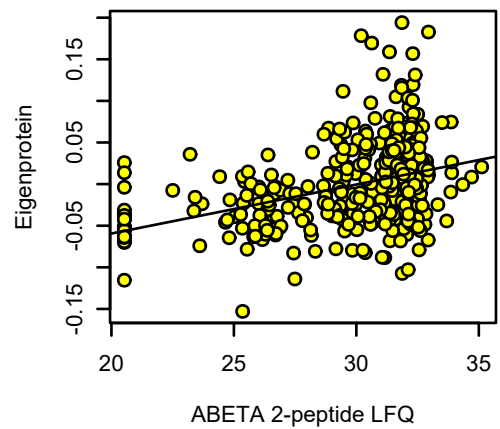

**bicor=0.51,  $p=3.6e-29$**   
**cor=0.57,  $p=1.8e-37$**

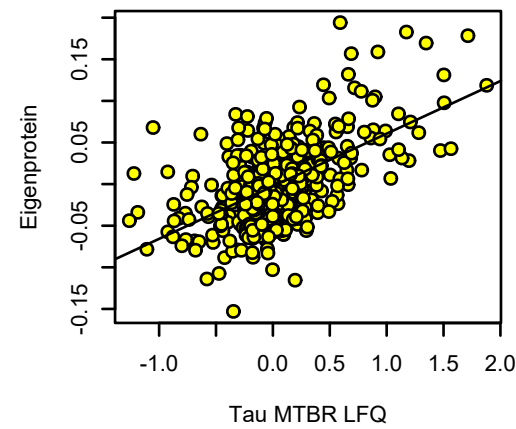

**bicor=-0.37,  $p=7.3e-15$**   
**cor=-0.35,  $p=1.6e-13$**

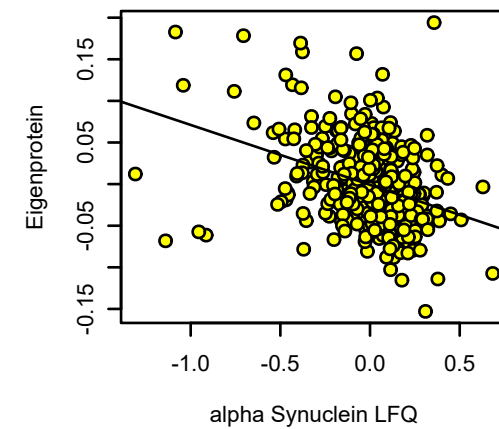

**M11 greenyellow**  
K-W  $p = 0.0032$

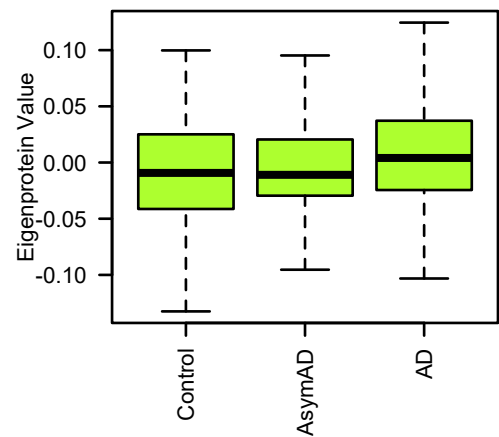

**M11 greenyellow**  
ND K-W  $p = 0.46$  | AD K-W  $p = 0.13$

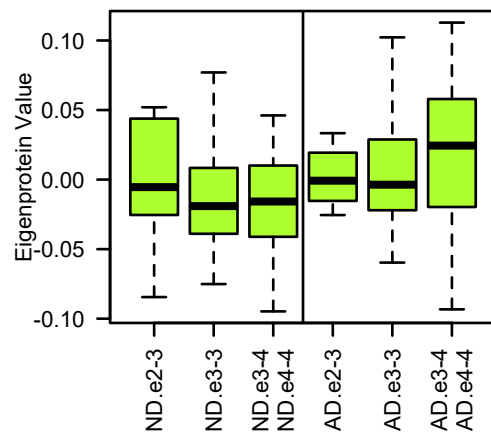

**bicor=0.13,  $p=0.0064$**   
**cor=0.13,  $p=0.0077$**

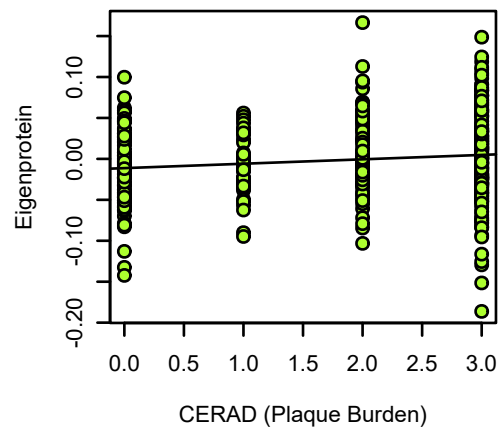

**bicor=0.11,  $p=0.02$**   
**cor=0.1,  $p=0.041$**

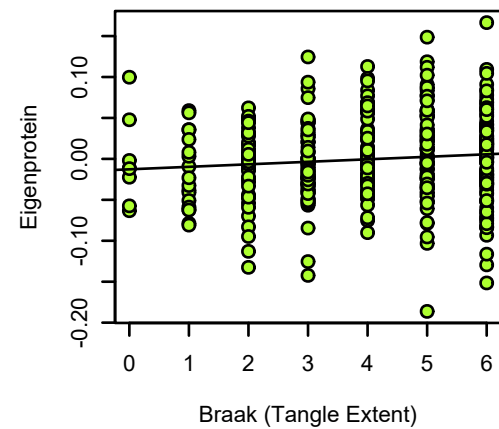

**bicor=0.11,  $p=0.17$**   
**cor=0.099,  $p=0.21$**

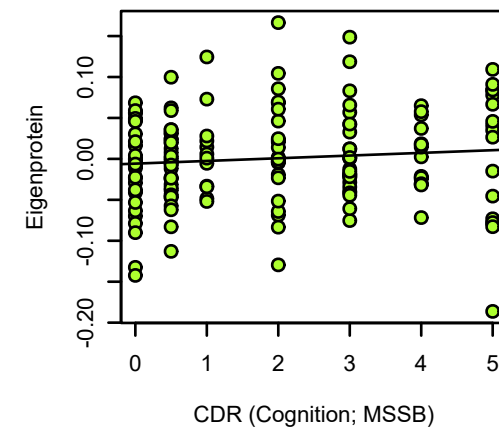

**bicor=-0.33,  $p=1.1e-05$**   
**cor=-0.3,  $p=8.2e-05$**

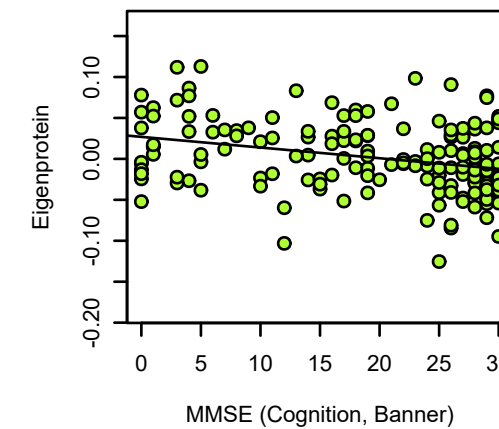

**bicor=-0.031,  $p=0.82$**   
**cor=-0.046,  $p=0.74$**

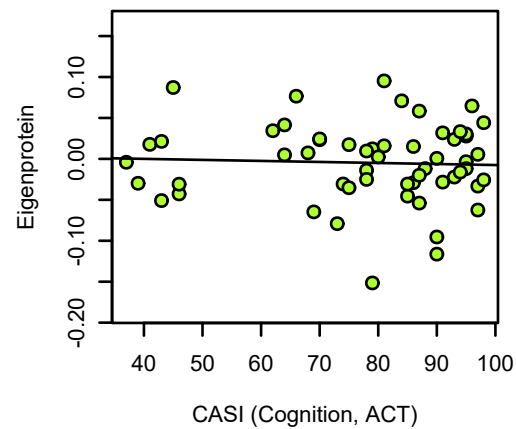

**bicor=-0.082,  $p=0.096$**   
**cor=-0.1,  $p=0.041$**

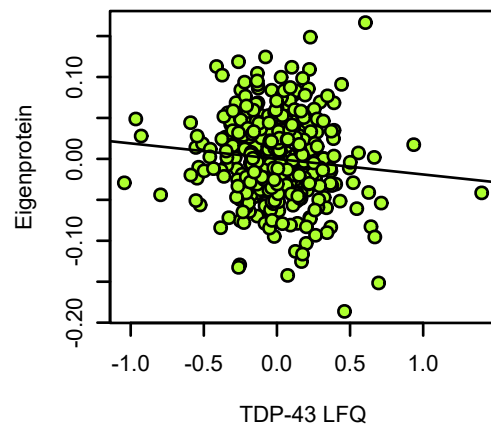

**bicor=0.034,  $p=0.49$**   
**cor=0.09,  $p=0.066$**

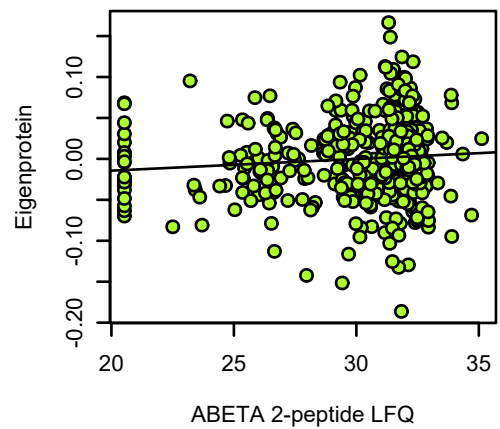

**bicor=0.063,  $p=0.2$**   
**cor=-0.0038,  $p=0.94$**

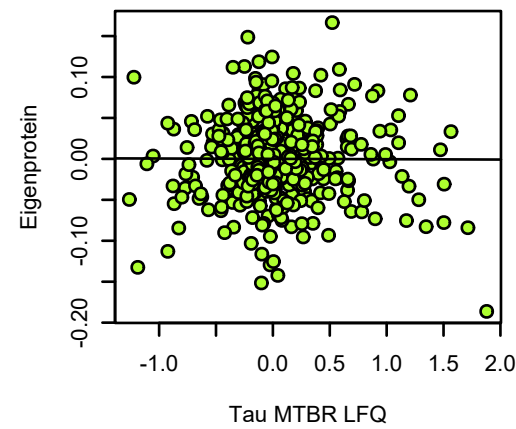

**bicor=-0.013,  $p=0.8$**   
**cor=0.06,  $p=0.22$**

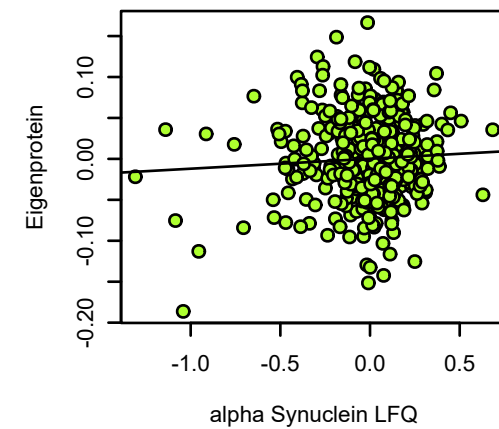

**M13 salmon**  
**K-W  $p = 0.012$**

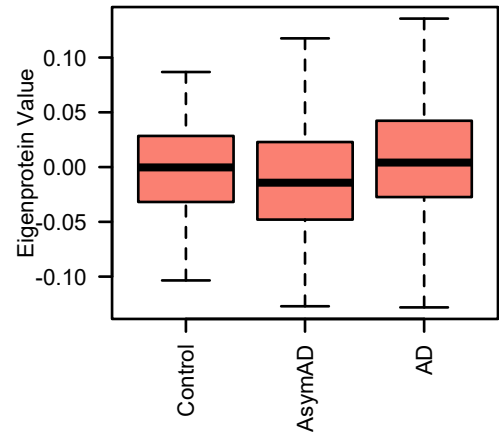

**M13 salmon**  
**ND K-W  $p = 0.56$  | AD K-W  $p = 0.24$**

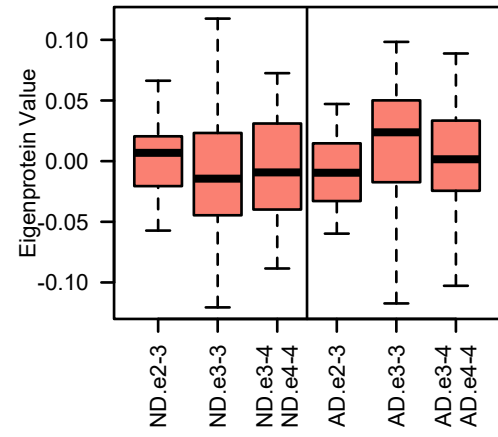

**bicor=0.041,  $p=0.4$**   
**cor=0.041,  $p=0.4$**

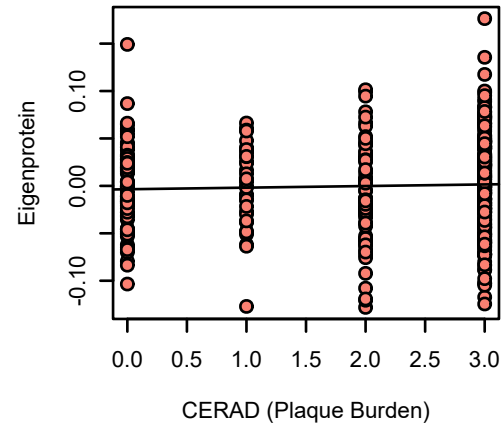

**bicor=0.05,  $p=0.3$**   
**cor=0.035,  $p=0.47$**

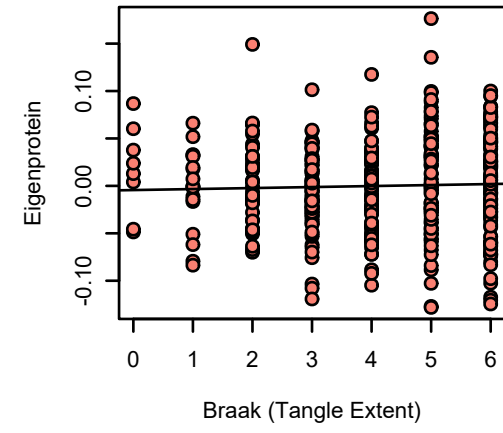

**bicor=0.13,  $p=0.099$**   
**cor=0.13,  $p=0.1$**

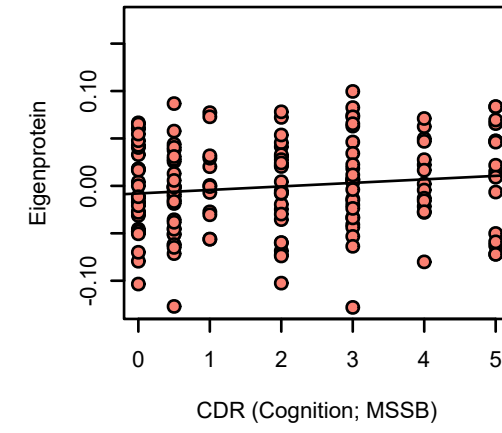

**bicor=-0.14,  $p=0.08$**   
**cor=-0.14,  $p=0.071$**

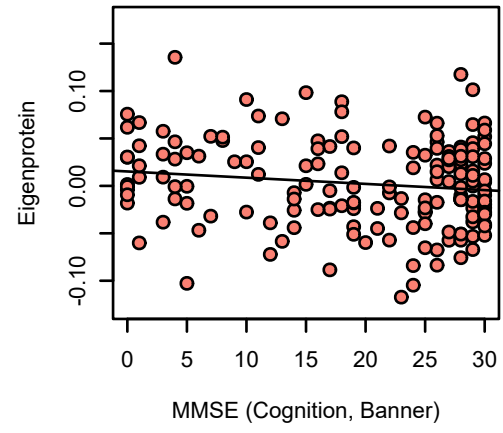

**bicor=-0.015,  $p=0.91$**   
**cor=-0.074,  $p=0.59$**

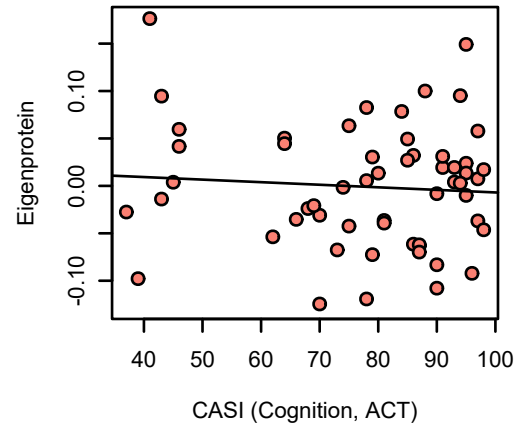

**bicor=-0.056,  $p=0.25$**   
**cor=-0.064,  $p=0.19$**

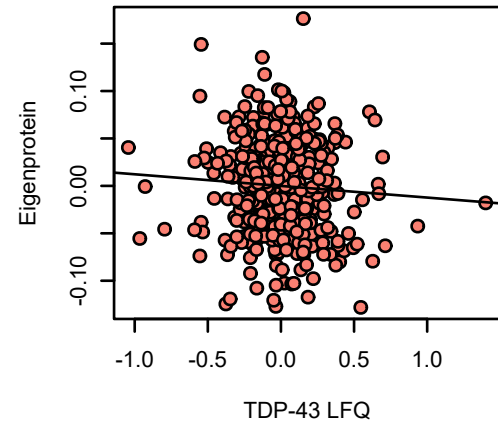

**bicor=0.0092,  $p=0.85$**   
**cor=0.027,  $p=0.58$**

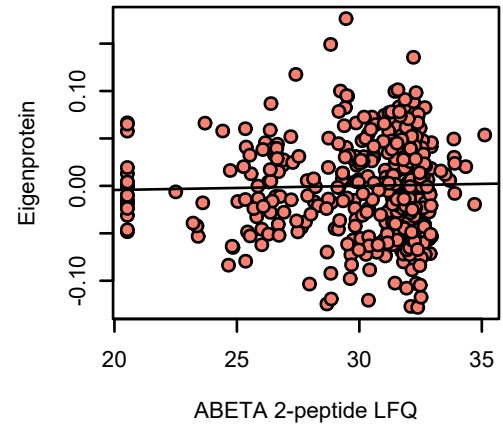

**bicor=0.049,  $p=0.31$**   
**cor=0.071,  $p=0.15$**

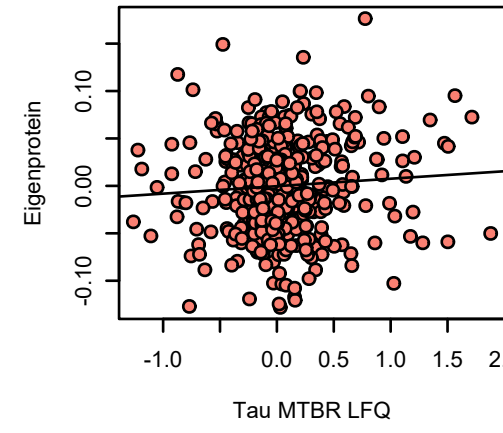

**bicor=-0.15,  $p=0.0021$**   
**cor=-0.14,  $p=0.0041$**

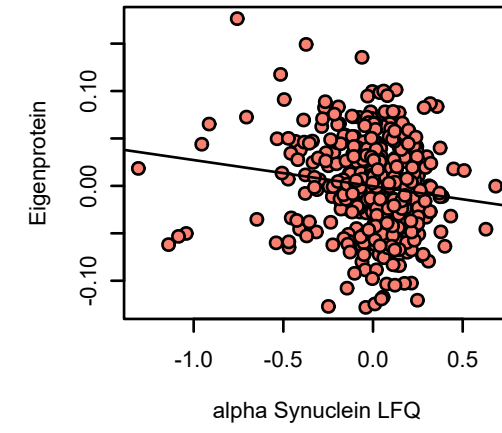

**M3 brown**  
**K-W  $p = 4.4e-12$**

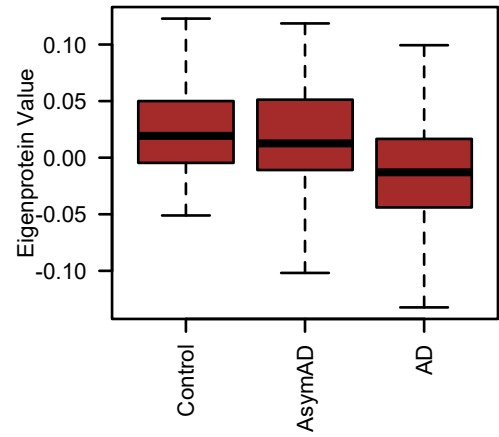

**M3 brown**  
**ND K-W  $p = 0.44$  | AD K-W  $p = 0.58$**

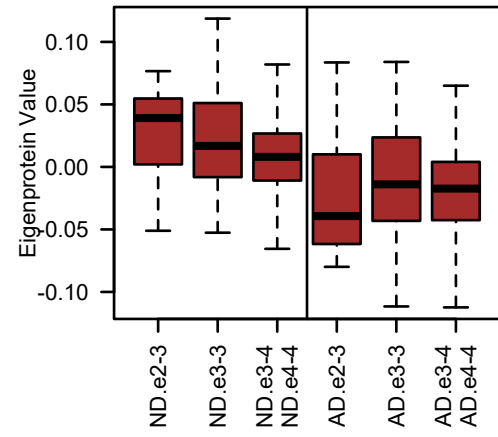

**bicor=-0.3,  $p=5.4e-10$**   
**cor=-0.28,  $p=5.5e-09$**

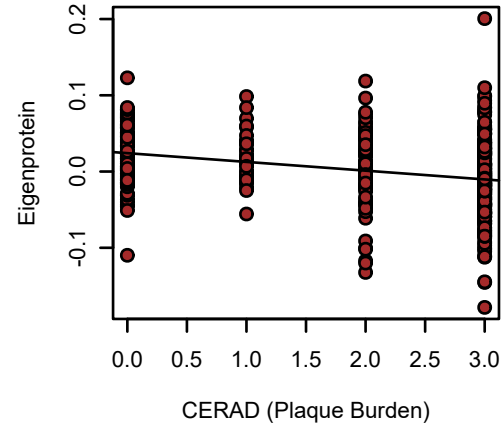

**bicor=-0.33,  $p=6.5e-12$**   
**cor=-0.31,  $p=8.8e-11$**

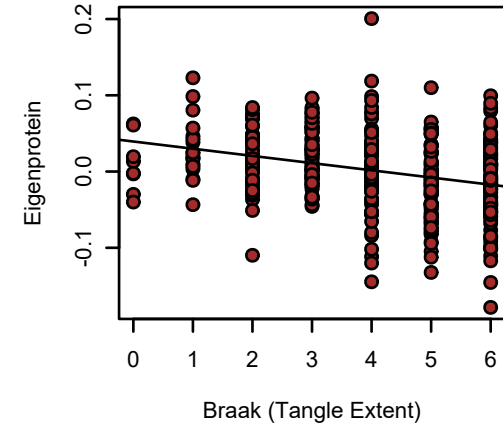

**bicor=-0.44,  $p=5.1e-09$**   
**cor=-0.47,  $p=4.1e-10$**

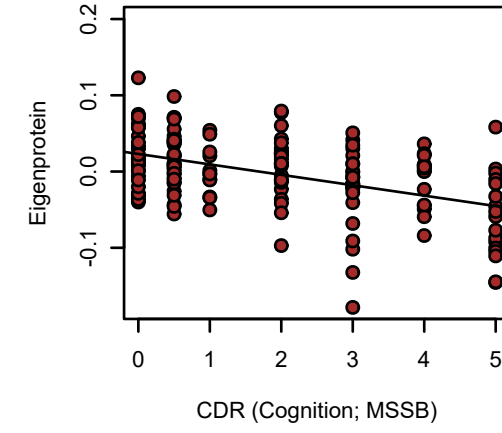

**bicor=0.47,  $p=1.8e-10$**   
**cor=0.47,  $p=1.5e-10$**

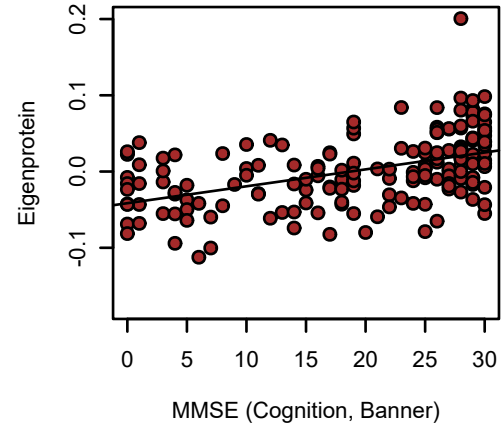

**bicor=0.24,  $p=0.069$**   
**cor=0.24,  $p=0.075$**

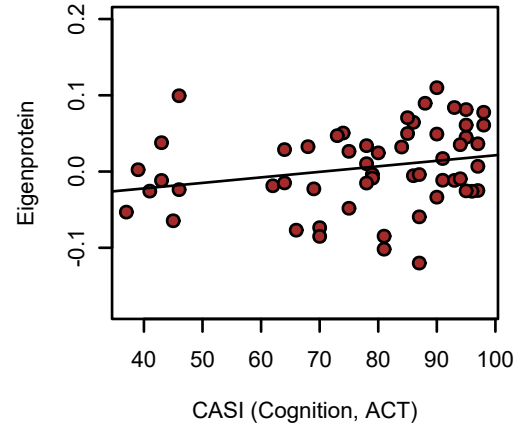

**bicor=-0.15,  $p=0.0018$**   
**cor=-0.11,  $p=0.024$**

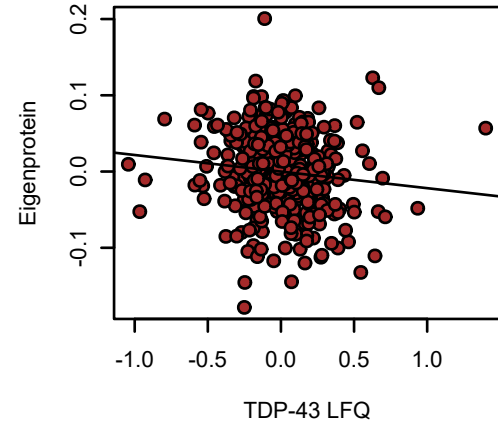

**bicor=-0.22,  $p=7.9e-06$**   
**cor=-0.24,  $p=6.7e-07$**

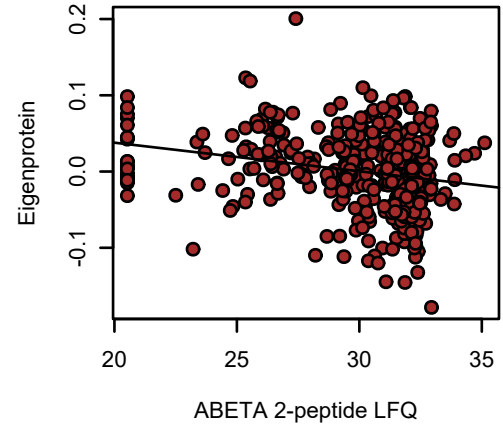

**bicor=-0.33,  $p=4e-12$**   
**cor=-0.37,  $p=4.9e-15$**

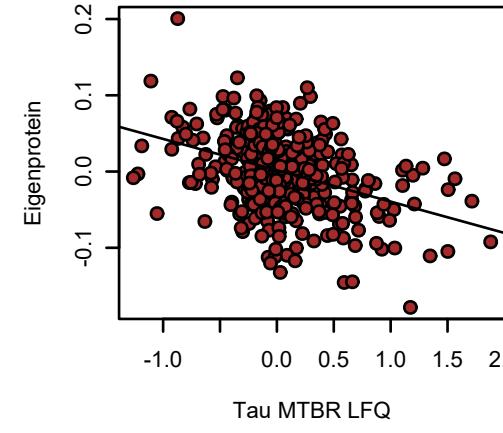

**bicor=0.12,  $p=0.011$**   
**cor=0.13,  $p=0.0077$**

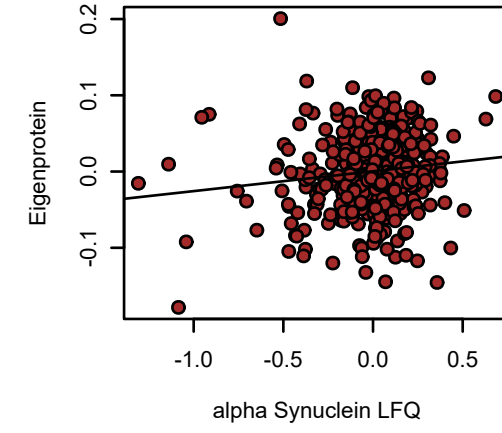

**M6 red**  
**K-W  $p = 2.2e-05$**

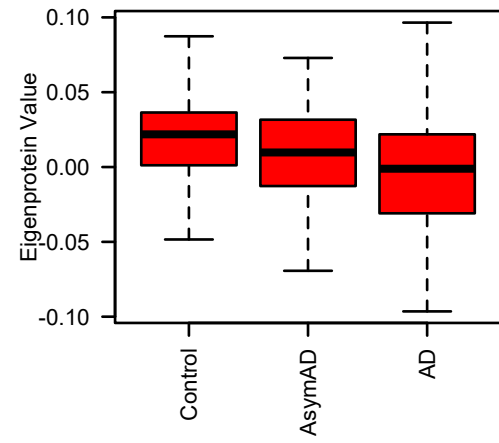

**M6 red**  
**ND K-W  $p = 0.48$  | **AD K-W  $p = 0.57$****

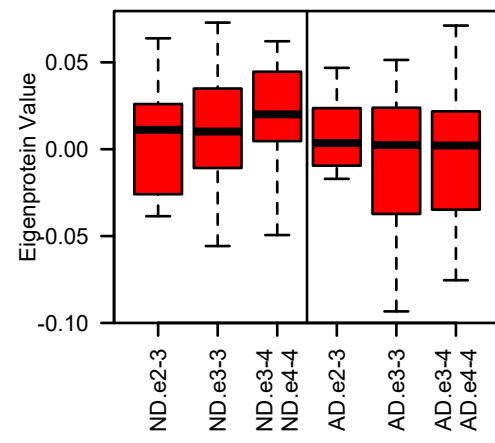

**bicor=-0.18,  $p=3e-04$**   
**cor=-0.18,  $p=0.00021$**

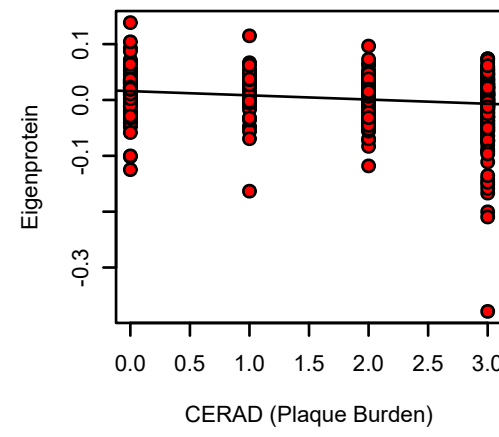

**bicor=-0.2,  $p=3.1e-05$**   
**cor=-0.19,  $p=9.1e-05$**

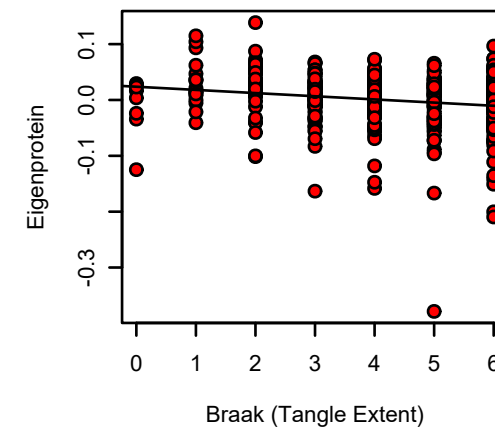

**bicor=-0.33,  $p=2.5e-05$**   
**cor=-0.34,  $p=1.2e-05$**

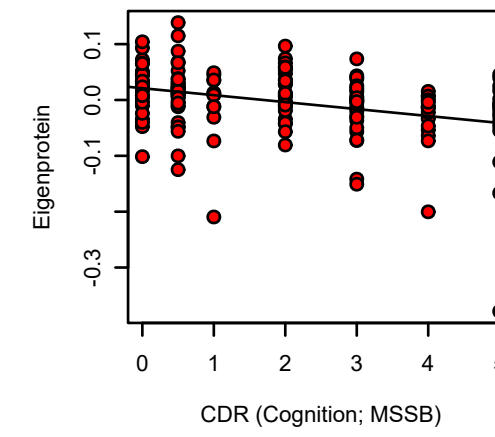

**bicor=0.25,  $p=0.0013$**   
**cor=0.18,  $p=0.02$**

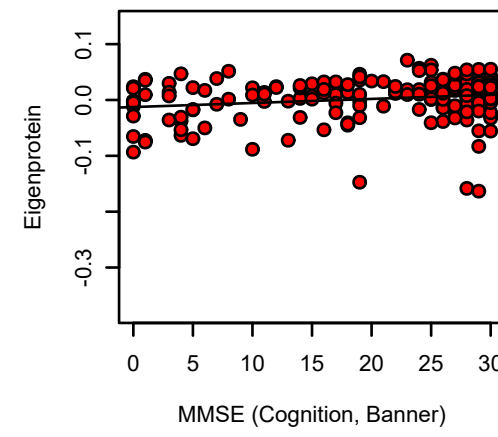

**bicor=0.28,  $p=0.034$**   
**cor=0.35,  $p=0.0082$**

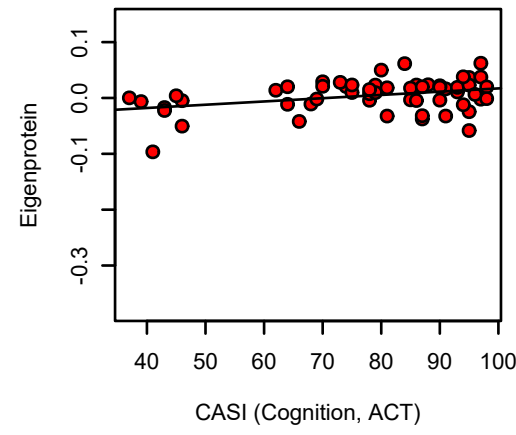

**bicor=-0.01,  $p=0.83$**   
**cor=0.023,  $p=0.64$**

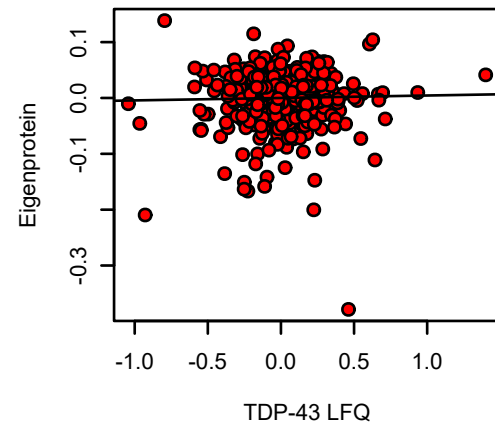

**bicor=-0.057,  $p=0.25$**   
**cor=-0.16,  $p=0.001$**

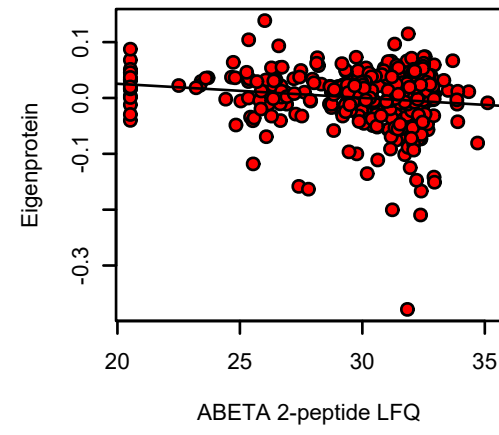

**bicor=0.006,  $p=0.9$**   
**cor=-0.1,  $p=0.041$**

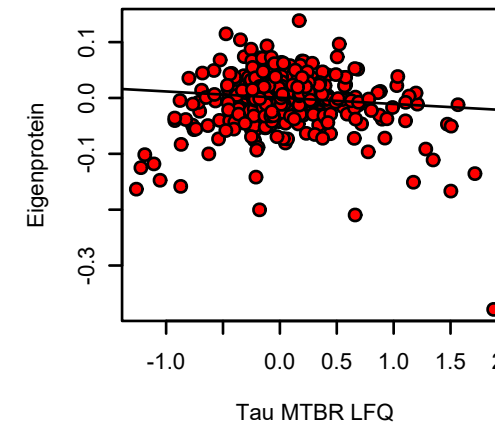

**bicor=0.64,  $p=4e-50$**   
**cor=0.69,  $p=1.6e-60$**

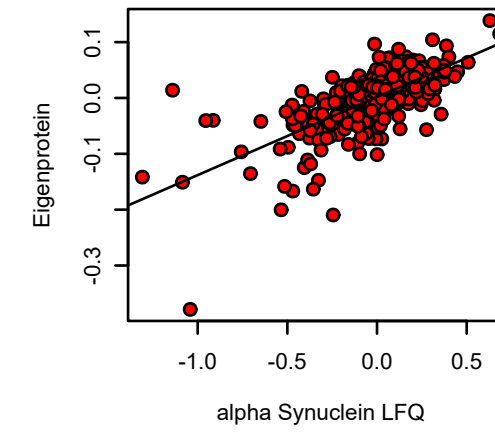

**M1 turquoise**  
**K-W  $p = 2.8e-11$**

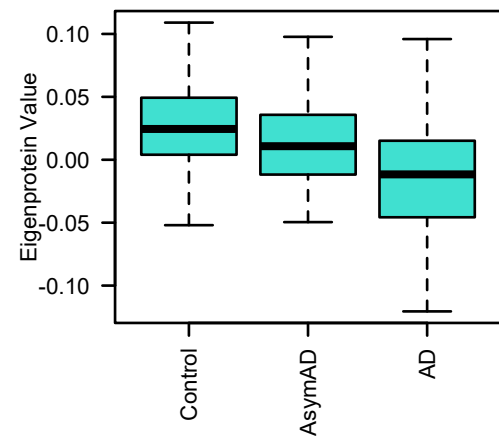

**M1 turquoise**  
**ND K-W  $p = 0.32$  | **AD K-W  $p = 0.17$****

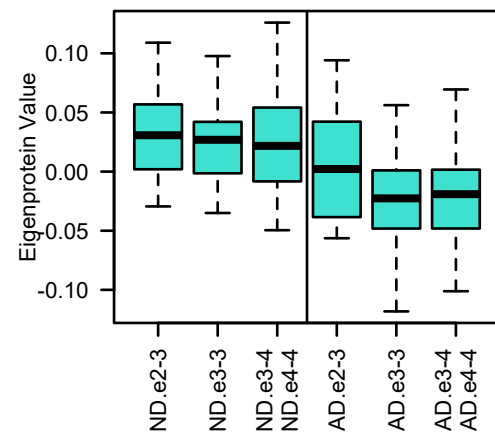

**bicor=-0.31,  $p=5e-11$**   
**cor=-0.29,  $p=1.5e-09$**

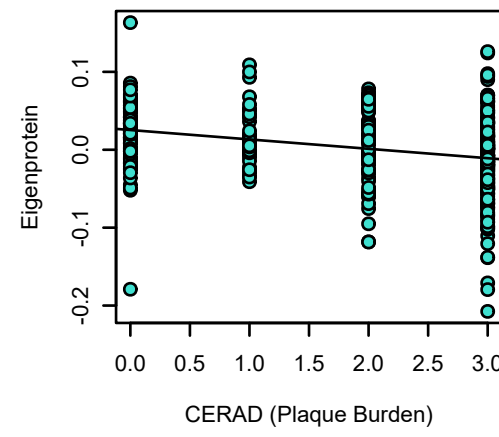

**bicor=-0.33,  $p=3.1e-12$**   
**cor=-0.28,  $p=5.5e-09$**

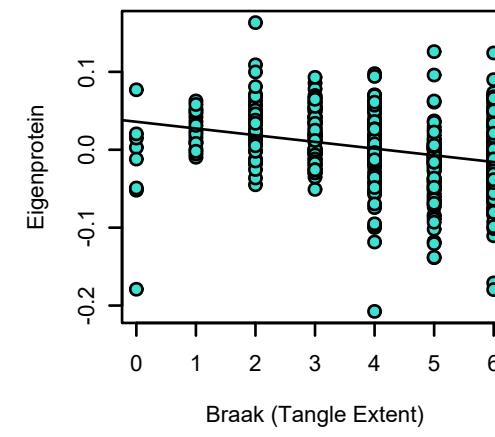

**bicor=-0.28,  $p=0.00029$**   
**cor=-0.31,  $p=7e-05$**

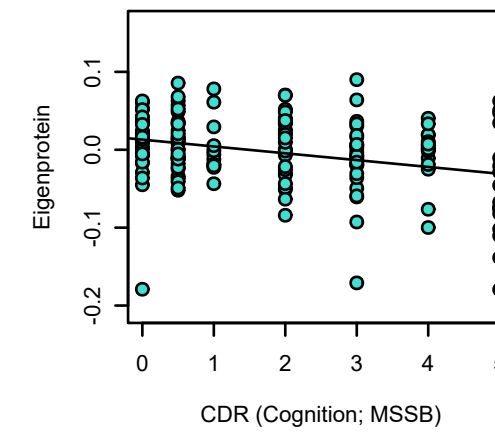

**bicor=0.47,  $p=9.8e-11$**   
**cor=0.44,  $p=2.7e-09$**

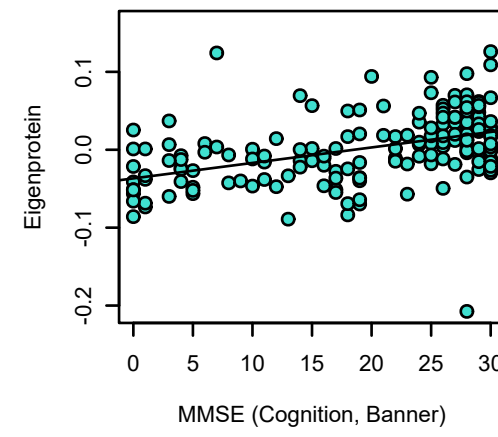

**bicor=0.32,  $p=0.015$**   
**cor=0.31,  $p=0.02$**

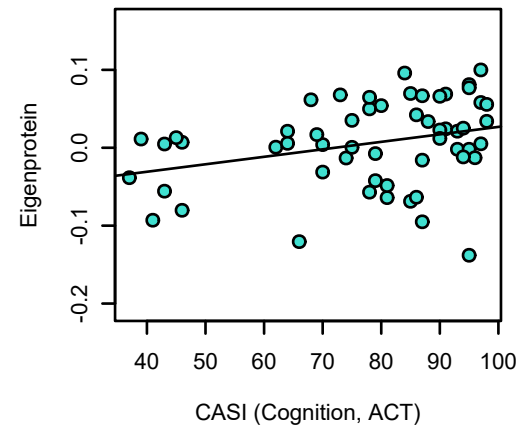

**bicor=-0.17,  $p=0.00046$**   
**cor=-0.12,  $p=0.014$**

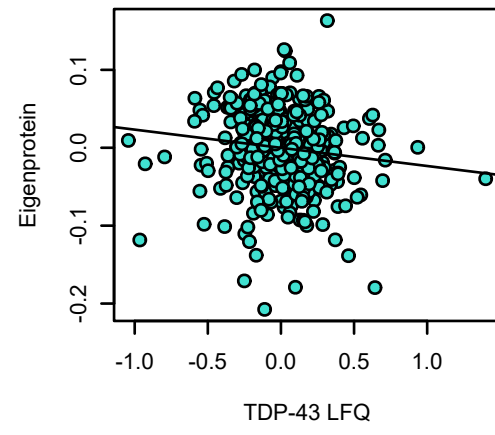

**bicor=-0.18,  $p=0.00023$**   
**cor=-0.24,  $p=6.7e-07$**

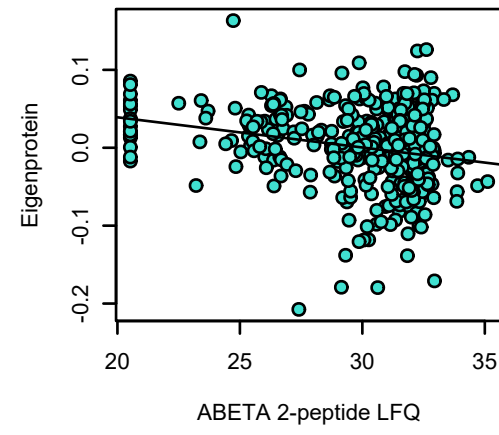

**bicor=-0.33,  $p=5.8e-12$**   
**cor=-0.34,  $p=8.5e-13$**

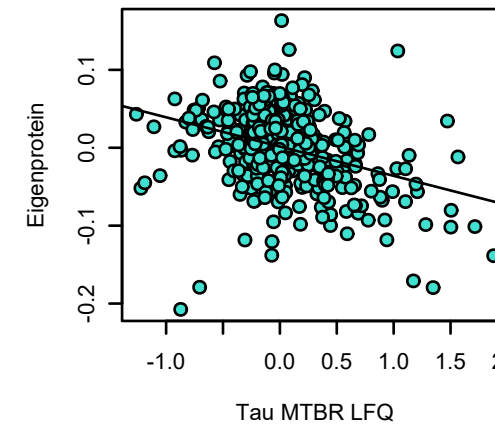

**bicor=0.53,  $p=1.5e-31$**   
**cor=0.51,  $p=4e-29$**

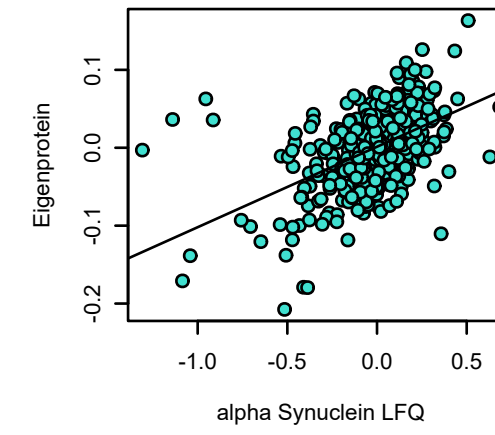

**M12 tan**  
**K-W  $p = 1.3e-06$**

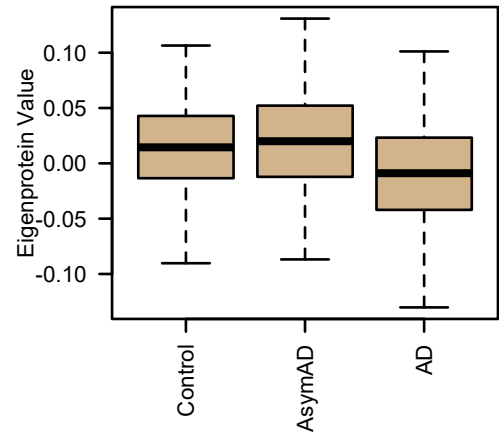

**bicor=0.23,  $p=0.089$**   
**cor=0.21,  $p=0.12$**

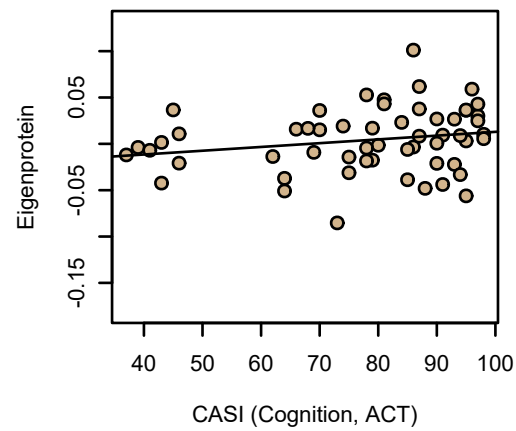

**M12 tan**  
**ND K-W  $p = 0.27$  | AD K-W  $p = 0.21$**

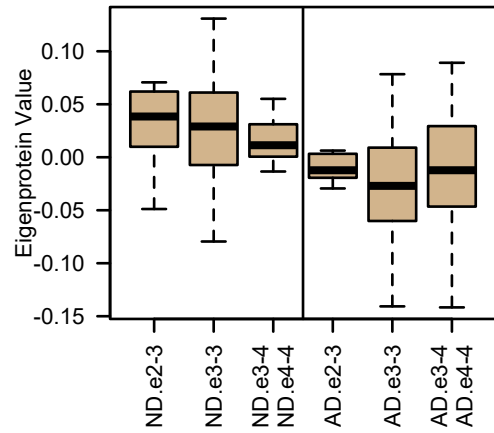

**bicor=-0.11,  $p=0.029$**   
**cor=-0.12,  $p=0.014$**

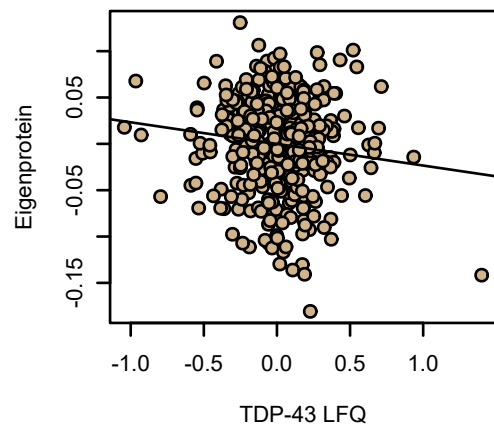

**bicor=-0.22,  $p=8.7e-06$**   
**cor=-0.21,  $p=1.5e-05$**

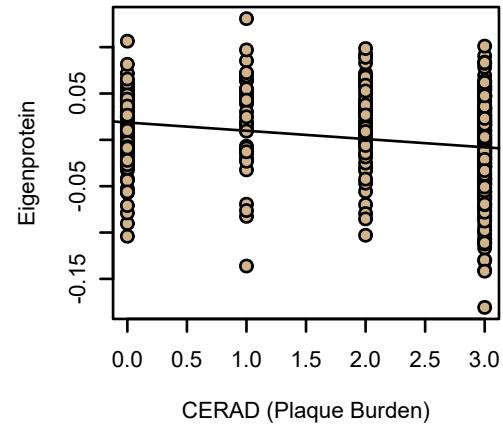

**bicor=-0.13,  $p=0.0065$**   
**cor=-0.2,  $p=3.7e-05$**

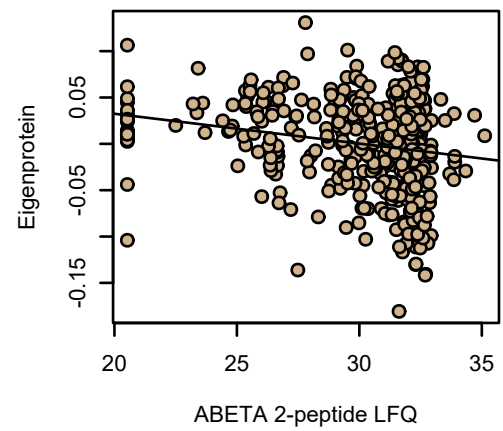

**bicor=-0.23,  $p=1.7e-06$**   
**cor=-0.2,  $p=3.7e-05$**

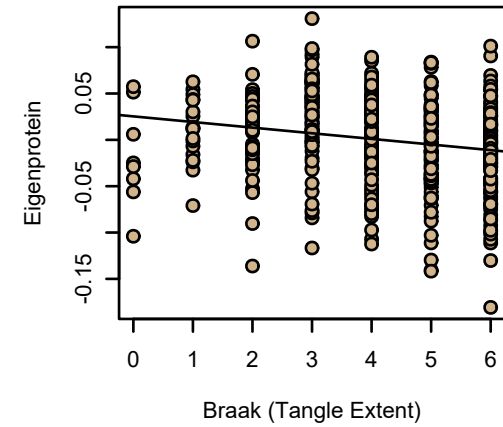

**bicor=-0.35,  $p=6.9e-14$**   
**cor=-0.32,  $p=2e-11$**

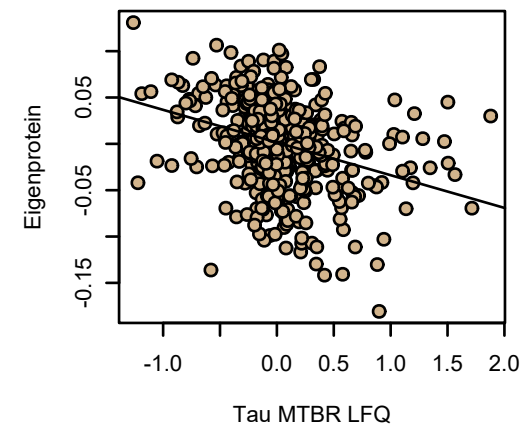

**bicor=-0.061,  $p=0.45$**   
**cor=-0.092,  $p=0.25$**

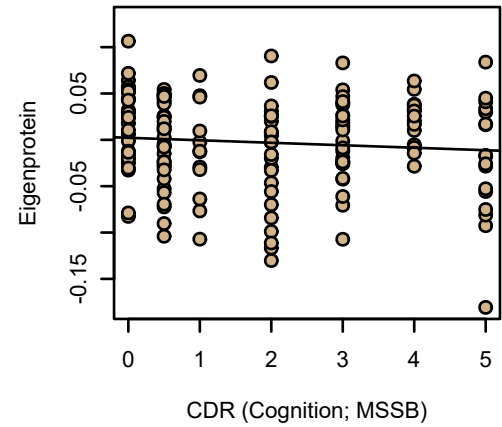

**bicor=-0.083,  $p=0.091$**   
**cor=-0.075,  $p=0.13$**

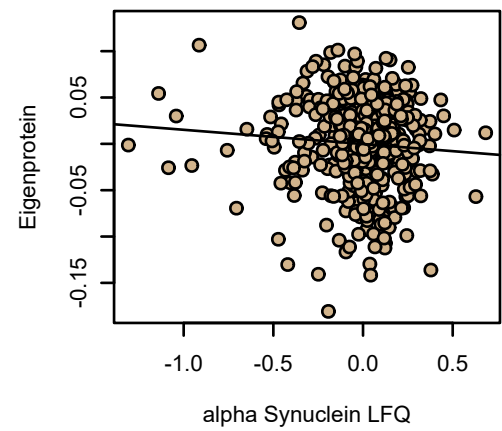

**bicor=0.3,  $p=9.1e-05$**   
**cor=0.26,  $p=0.00069$**

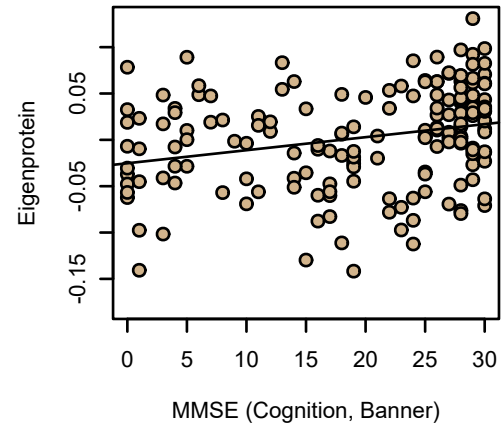

**M7 black**  
**K-W  $p = 0.18$**

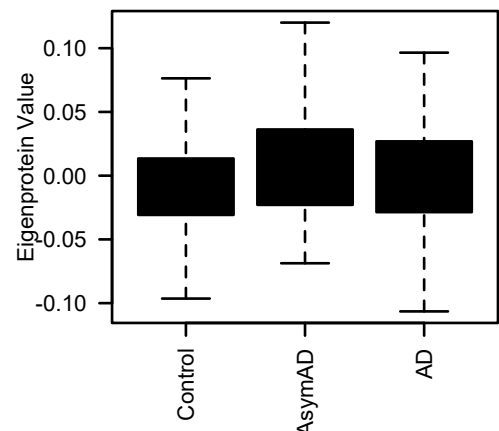

**bicor=-0.091,  $p=0.5$**   
**cor=-0.015,  $p=0.91$**

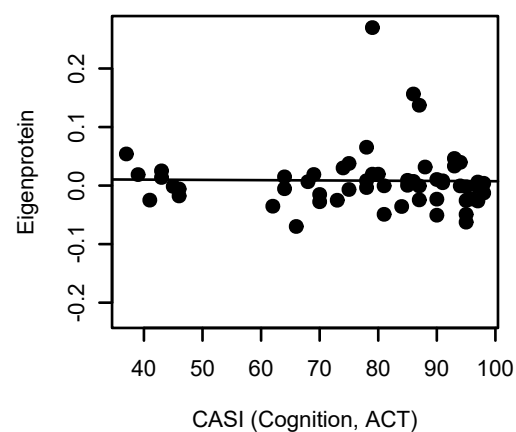

**M7 black**  
**ND K-W  $p = 0.59$  | AD K-W  $p = 0.47$**

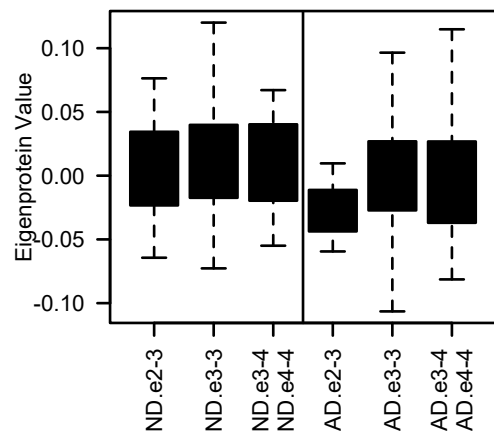

**bicor=0.11,  $p=0.024$**   
**cor=0.13,  $p=0.0077$**

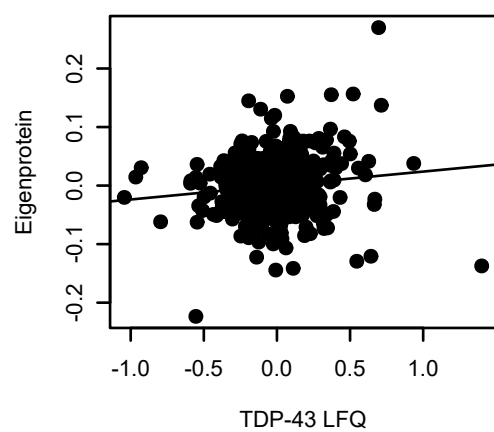

**bicor=0.055,  $p=0.26$**   
**cor=0.038,  $p=0.44$**

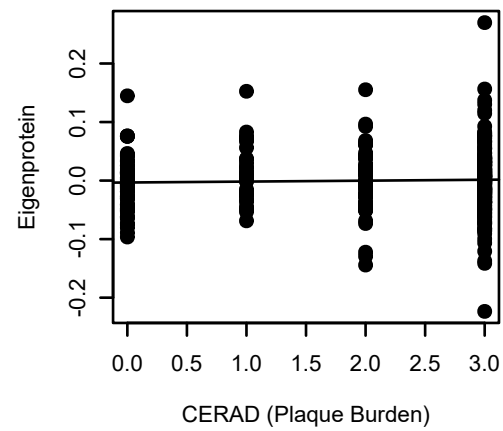

**bicor=-0.044,  $p=0.37$**   
**cor=-0.037,  $p=0.45$**

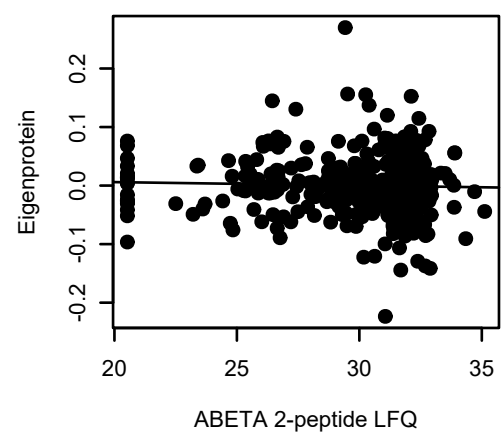

**bicor=0.027,  $p=0.58$**   
**cor=0.02,  $p=0.68$**

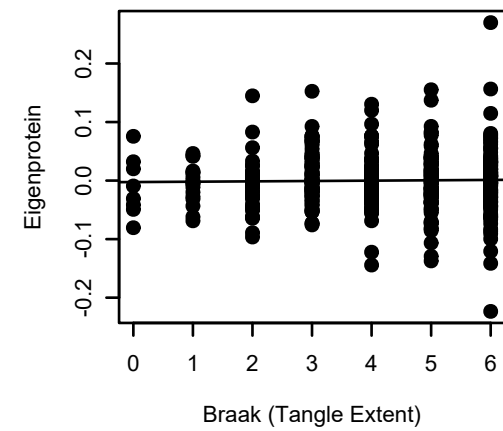

**bicor=0.0037,  $p=0.94$**   
**cor=0.026,  $p=0.6$**

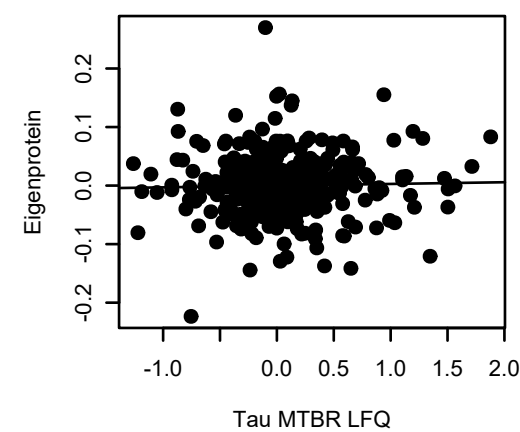

**bicor=0.11,  $p=0.18$**   
**cor=0.075,  $p=0.35$**

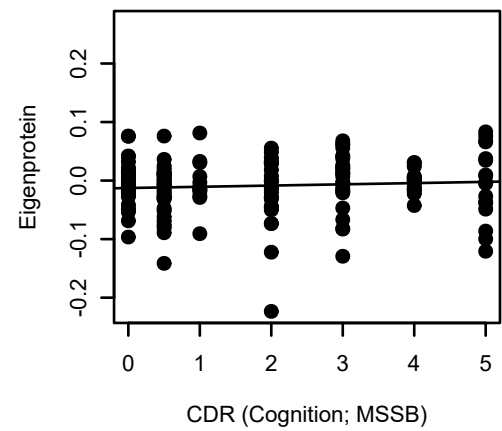

**bicor=0.025,  $p=0.61$**   
**cor=0.0038,  $p=0.94$**

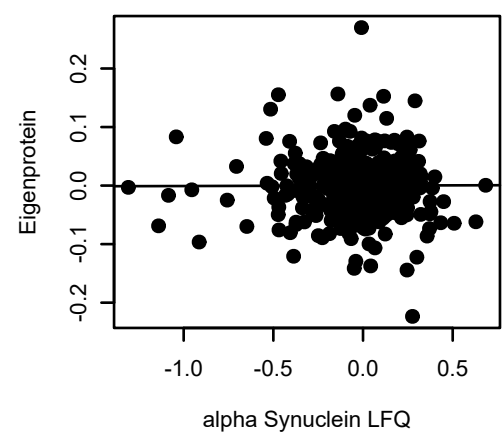

**bicor=0.24,  $p=0.0022$**   
**cor=0.23,  $p=0.0028$**

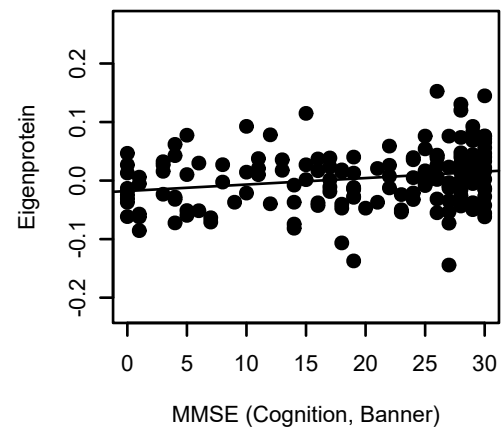

**M9 magenta**  
K-W  $p = 0.05$

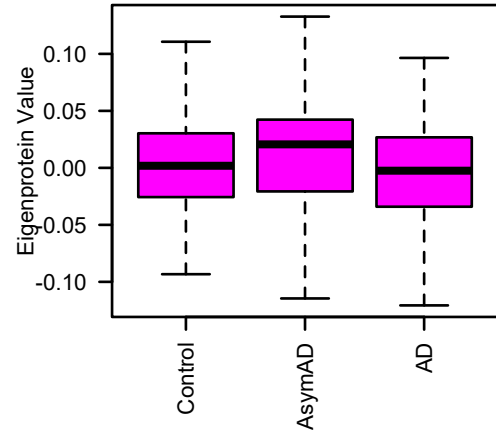

**M9 magenta**  
ND K-W  $p = 0.35$  | AD K-W  $p = 0.41$

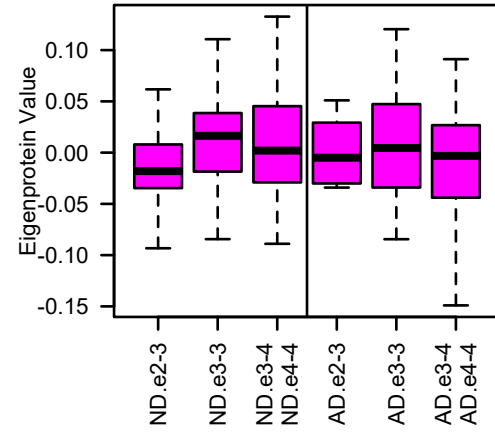

**bicor=-0.055, p=0.26**  
**cor=-0.06, p=0.22**

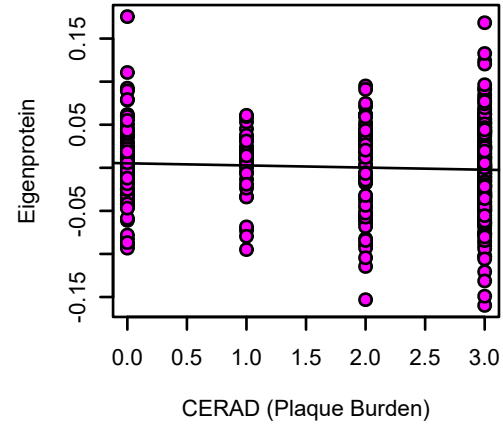

**bicor=-0.094, p=0.054**  
**cor=-0.087, p=0.075**

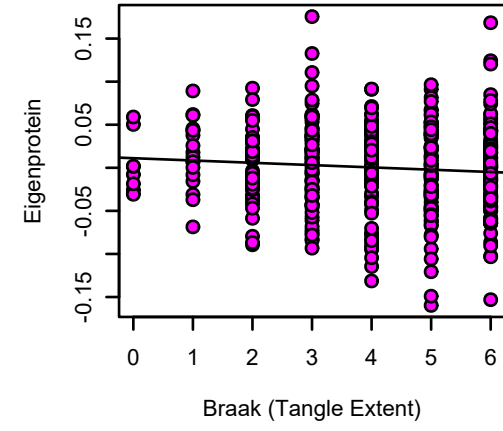

**bicor=-0.1, p=0.2**  
**cor=-0.12, p=0.13**

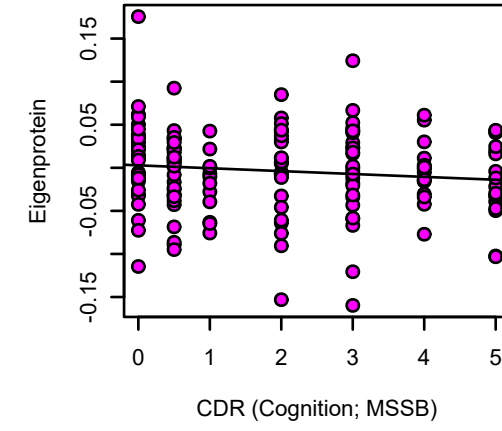

**bicor=0.13, p=0.095**  
**cor=0.14, p=0.071**

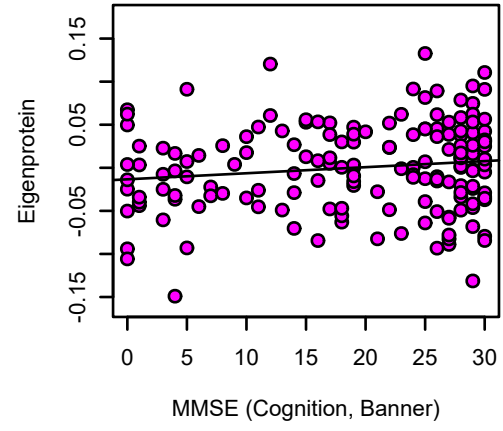

**bicor=0.37, p=0.0055**  
**cor=0.33, p=0.013**

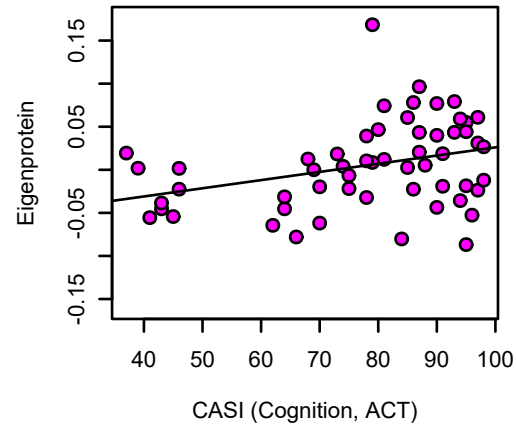

**bicor=0.13, p=0.0057**  
**cor=0.14, p=0.0041**

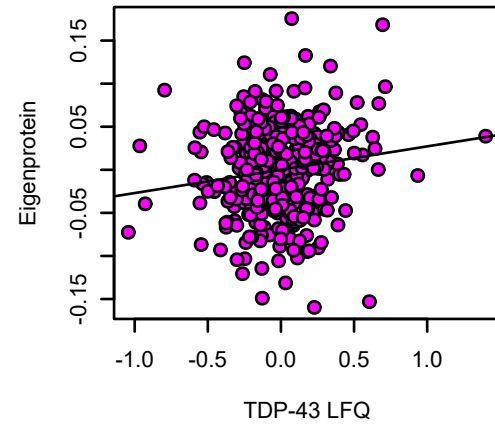

**bicor=-0.023, p=0.64**  
**cor=-0.029, p=0.55**

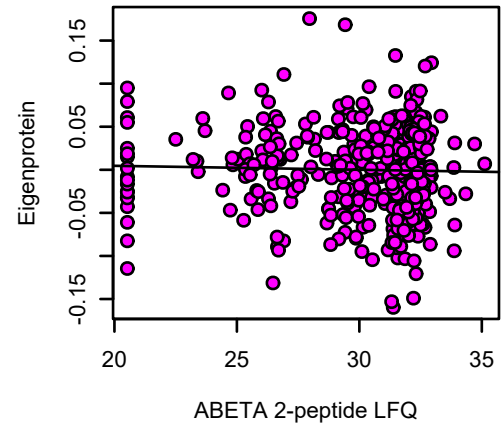

**bicor=-0.052, p=0.28**  
**cor=-0.05, p=0.31**

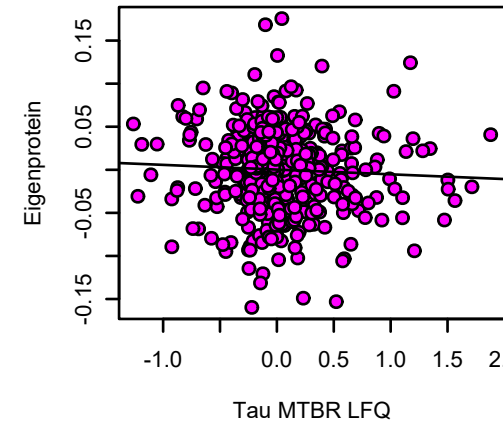

**bicor=0.01, p=0.84**  
**cor=0.037, p=0.45**

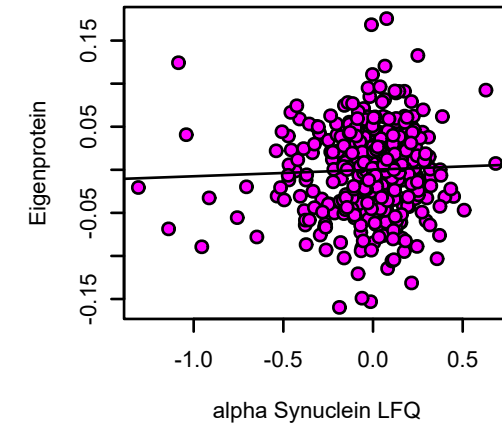

**Supplementary Figure 1. AD Network Module Phenotype Correlations.** Each module eigenprotein was assessed for group differences by case status and *APOE* genotype, and correlated to genetic, neuropathological, cognitive/functional, and molecular traits ( $n=419$  independent case sample traits after network connectivity outlier removal except for cognitive measures, where  $n=167$  MMSE,  $n=159$  CDR, and  $n=56$  CASI). *APOE* genotype information is from the Banner and BLSA cohorts. Control ( $n=91$ ) and AsymAD ( $n=98$ ) cases were grouped into non-demented (ND) in the *APOE* analysis for sufficient statistical power (ND:  $n=16$  E2/3,  $n=68$  E3/3,  $n=22$  E3/4 and E4/4; AD:  $n=8$  E2/3,  $n=38$  E3/3,  $n=54$  E3/4 and E4/4). E2/2 ( $n=1$  AsymAD) and E2/4 ( $n=1$  AsymAD) were excluded from the analysis. Eigenprotein differences by case status or *APOE* genotype were assessed by Kruskal-Wallis (K-W) one-way ANOVA. Statistical significance at  $p < 0.05$  for case status is highlighted in red. Correlations were performed using both Pearson correlation (cor) and biweight midcorrelation (bicor), which is more robust to outliers. Boxplots represent the median, 25<sup>th</sup>, and 75<sup>th</sup> percentiles, and whiskers represent measurements to the 5<sup>th</sup> and 95<sup>th</sup> percentiles.



# M5 Extracellular Matrix

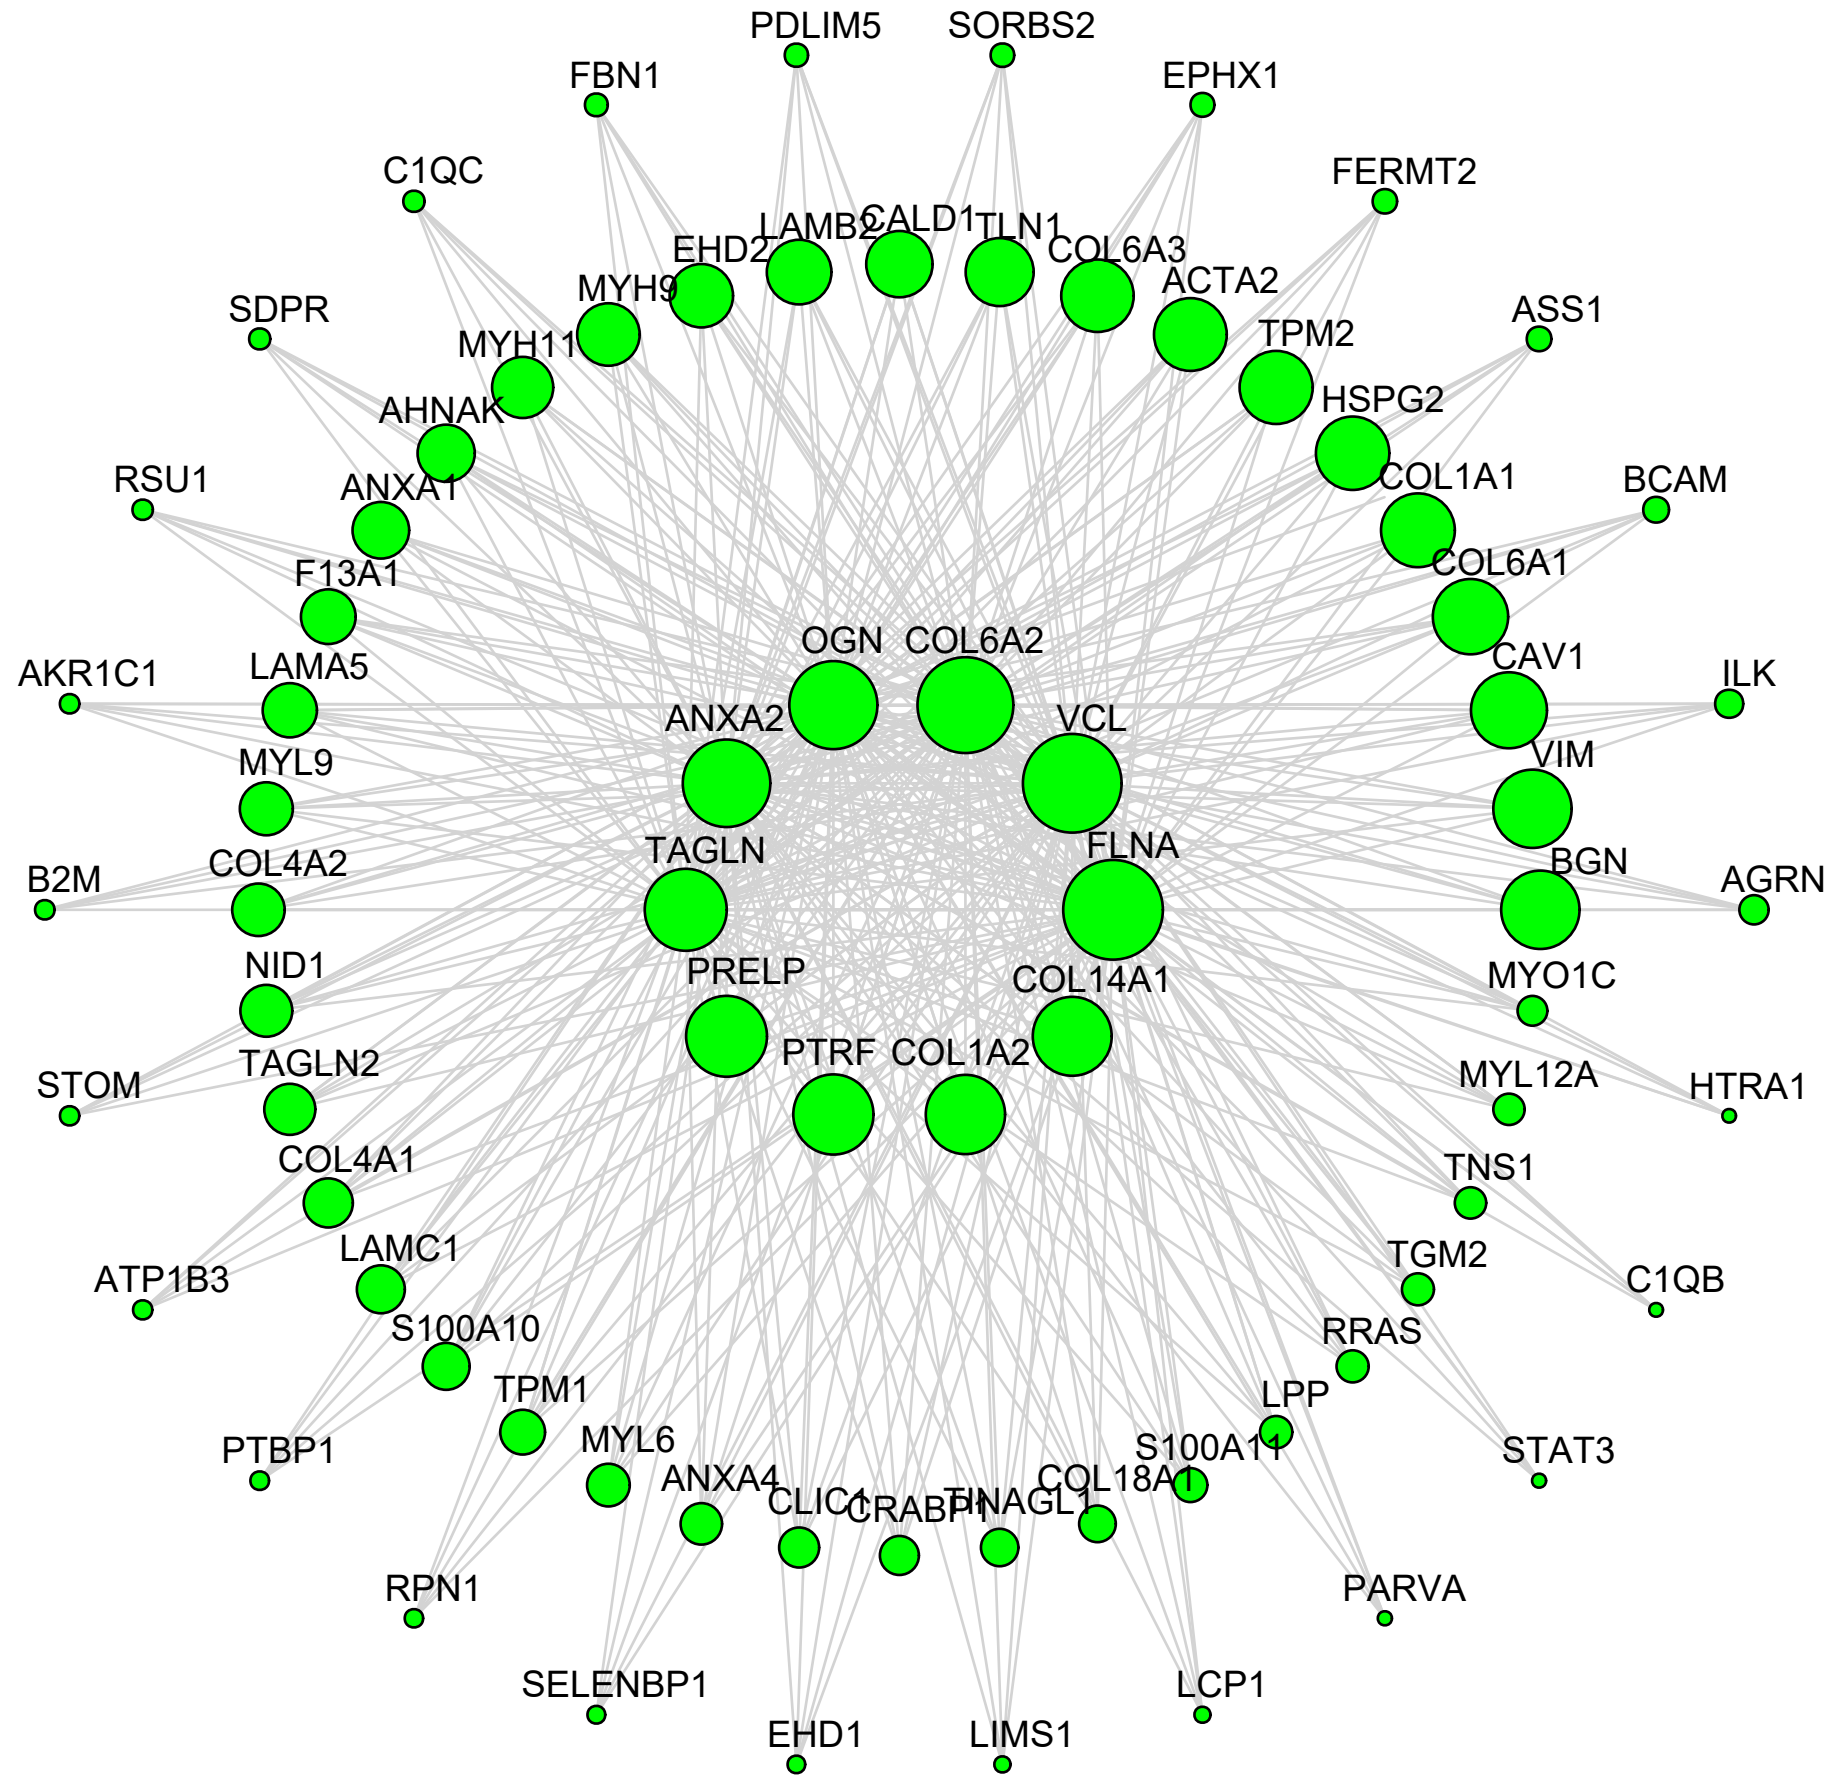

# M8 Blood

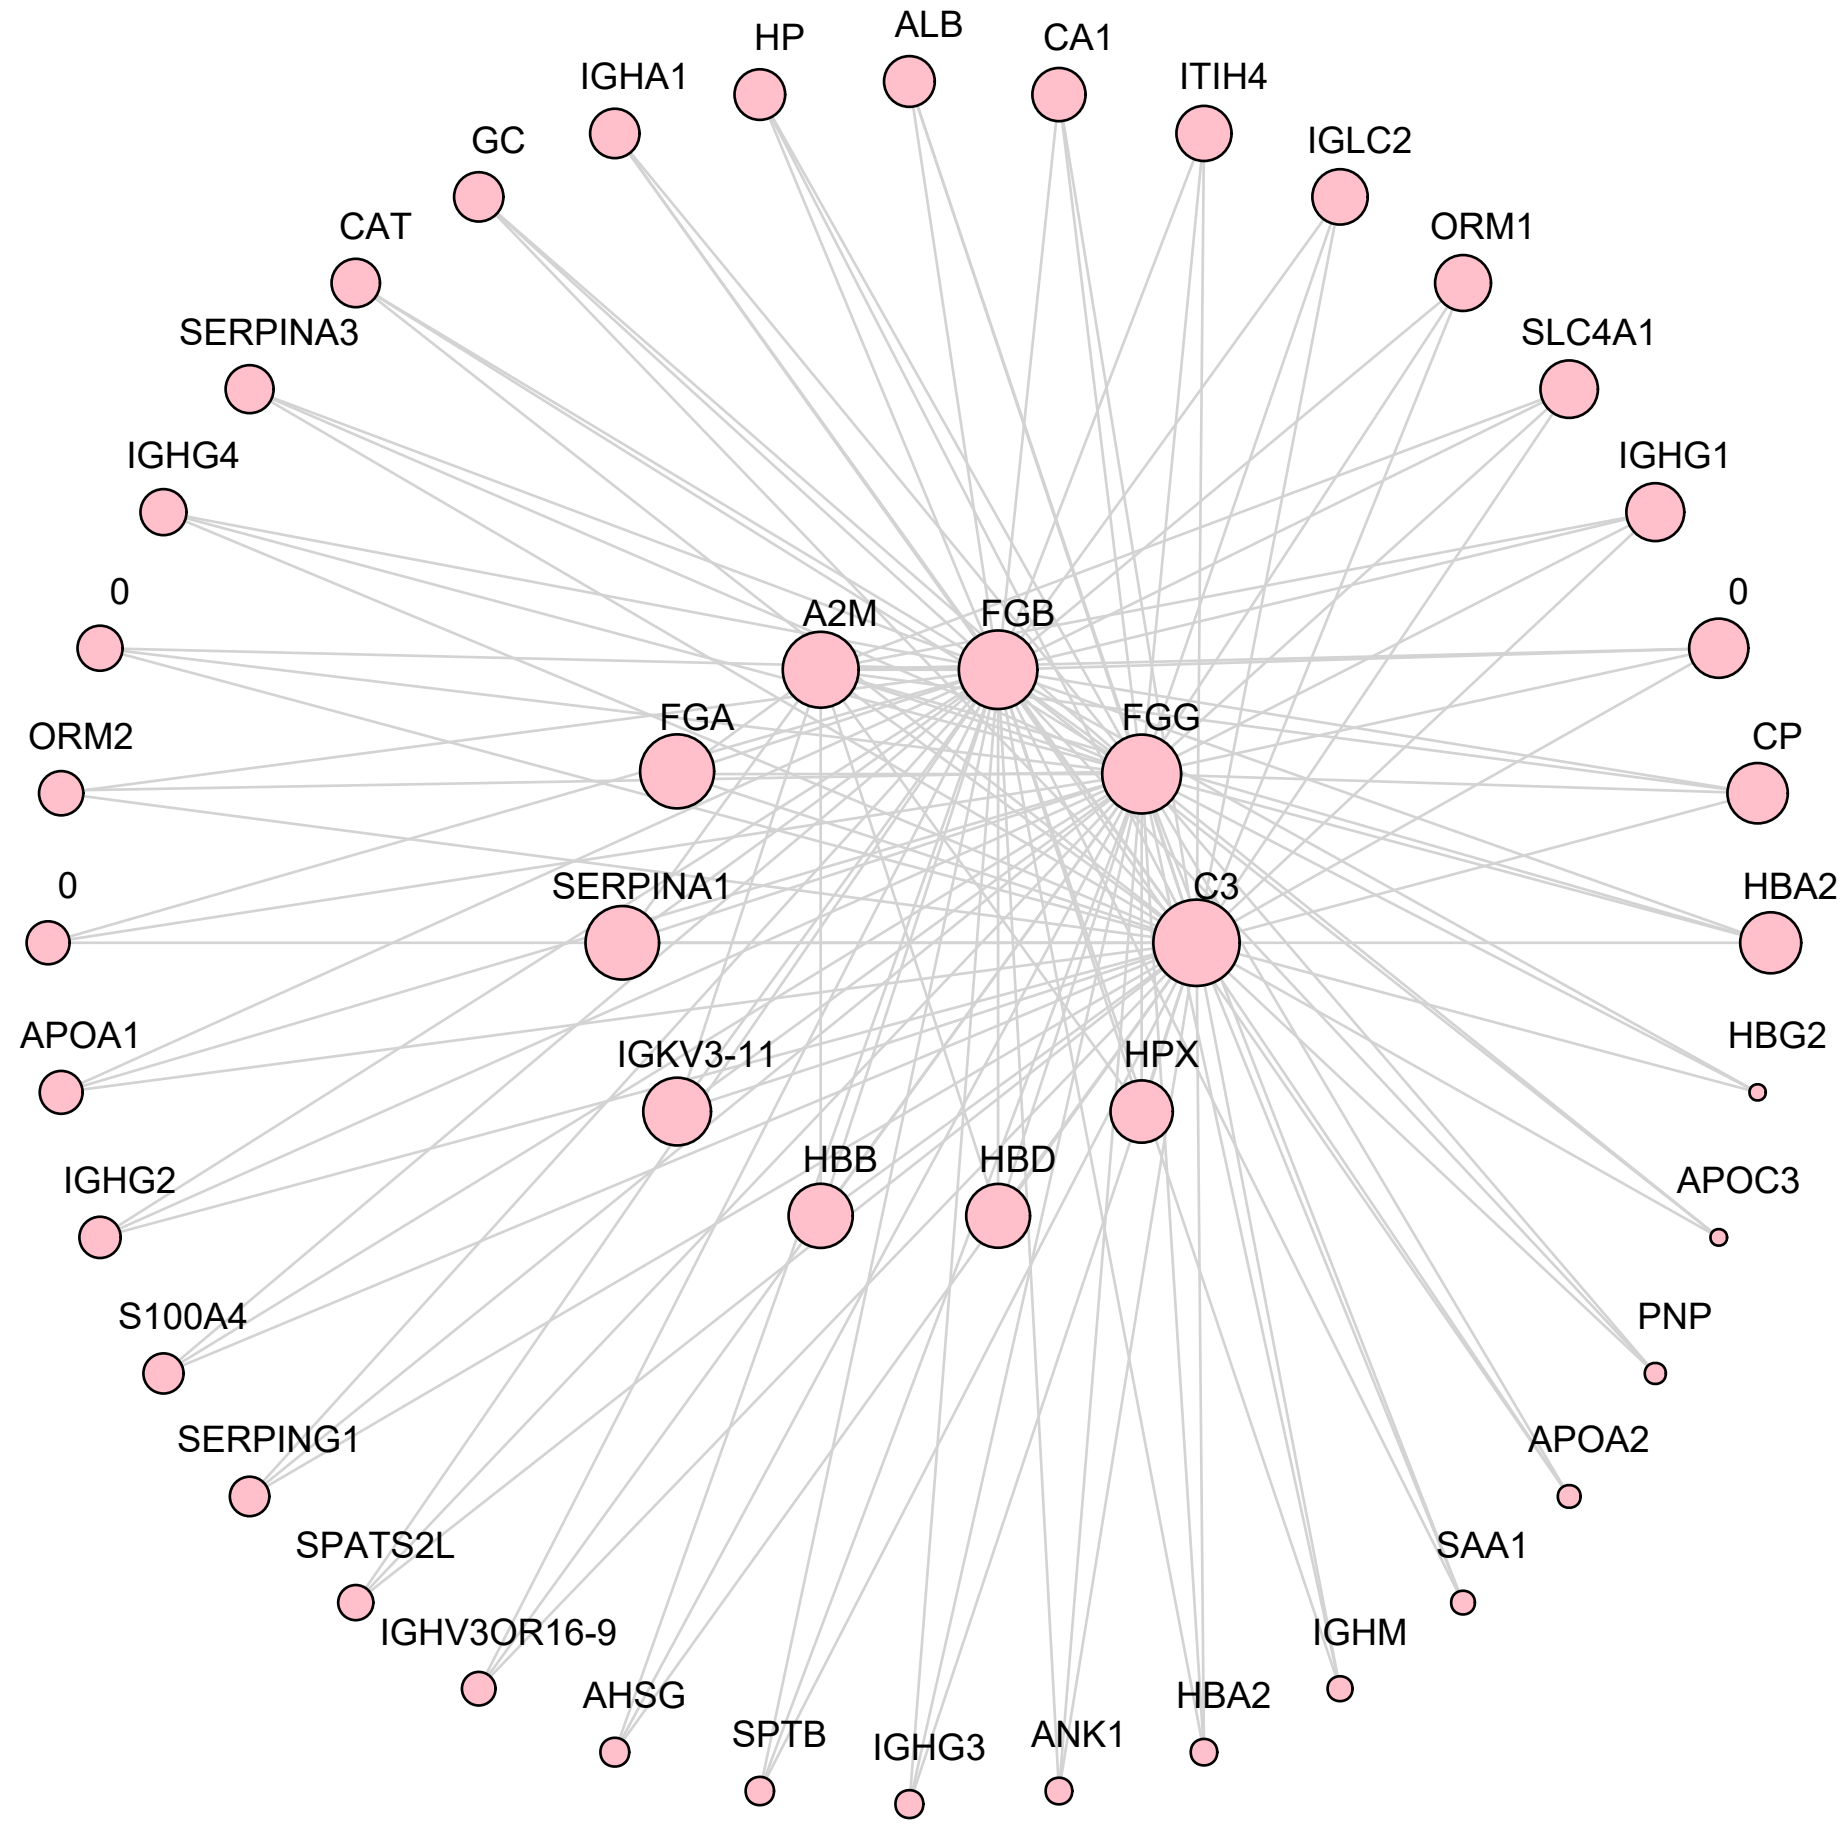

# M10 RNA Binding/Splicing

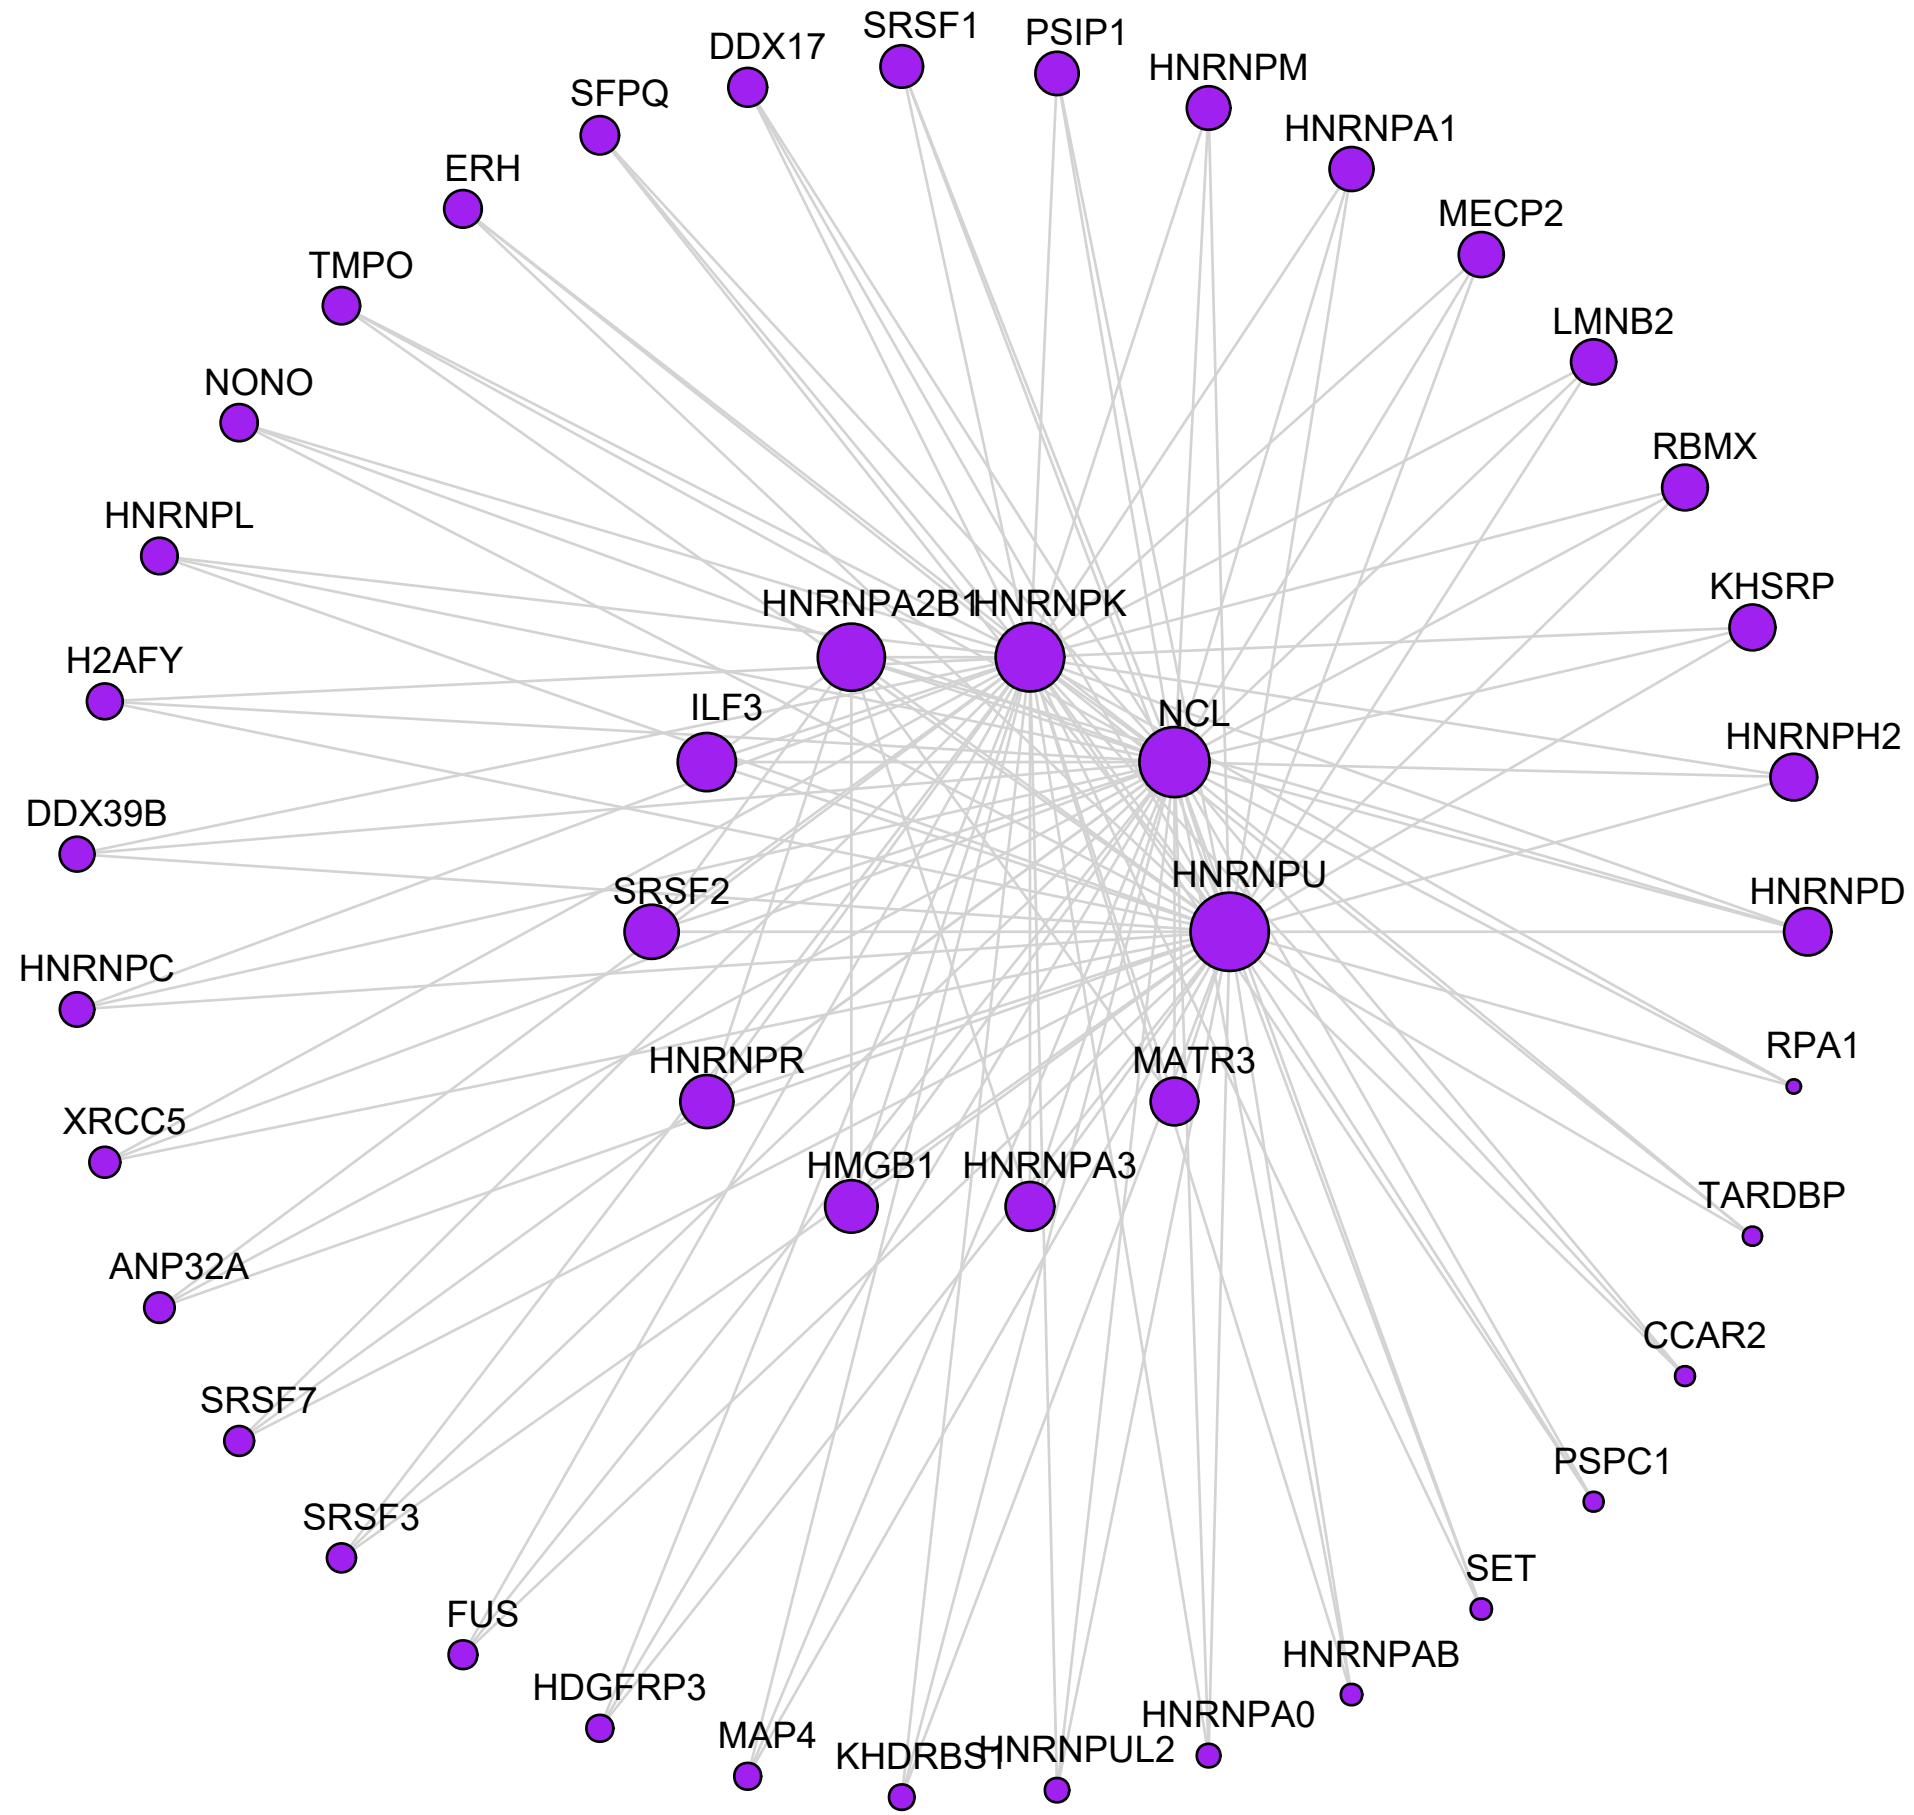

# M2 Myelin/Oligodendrocyte

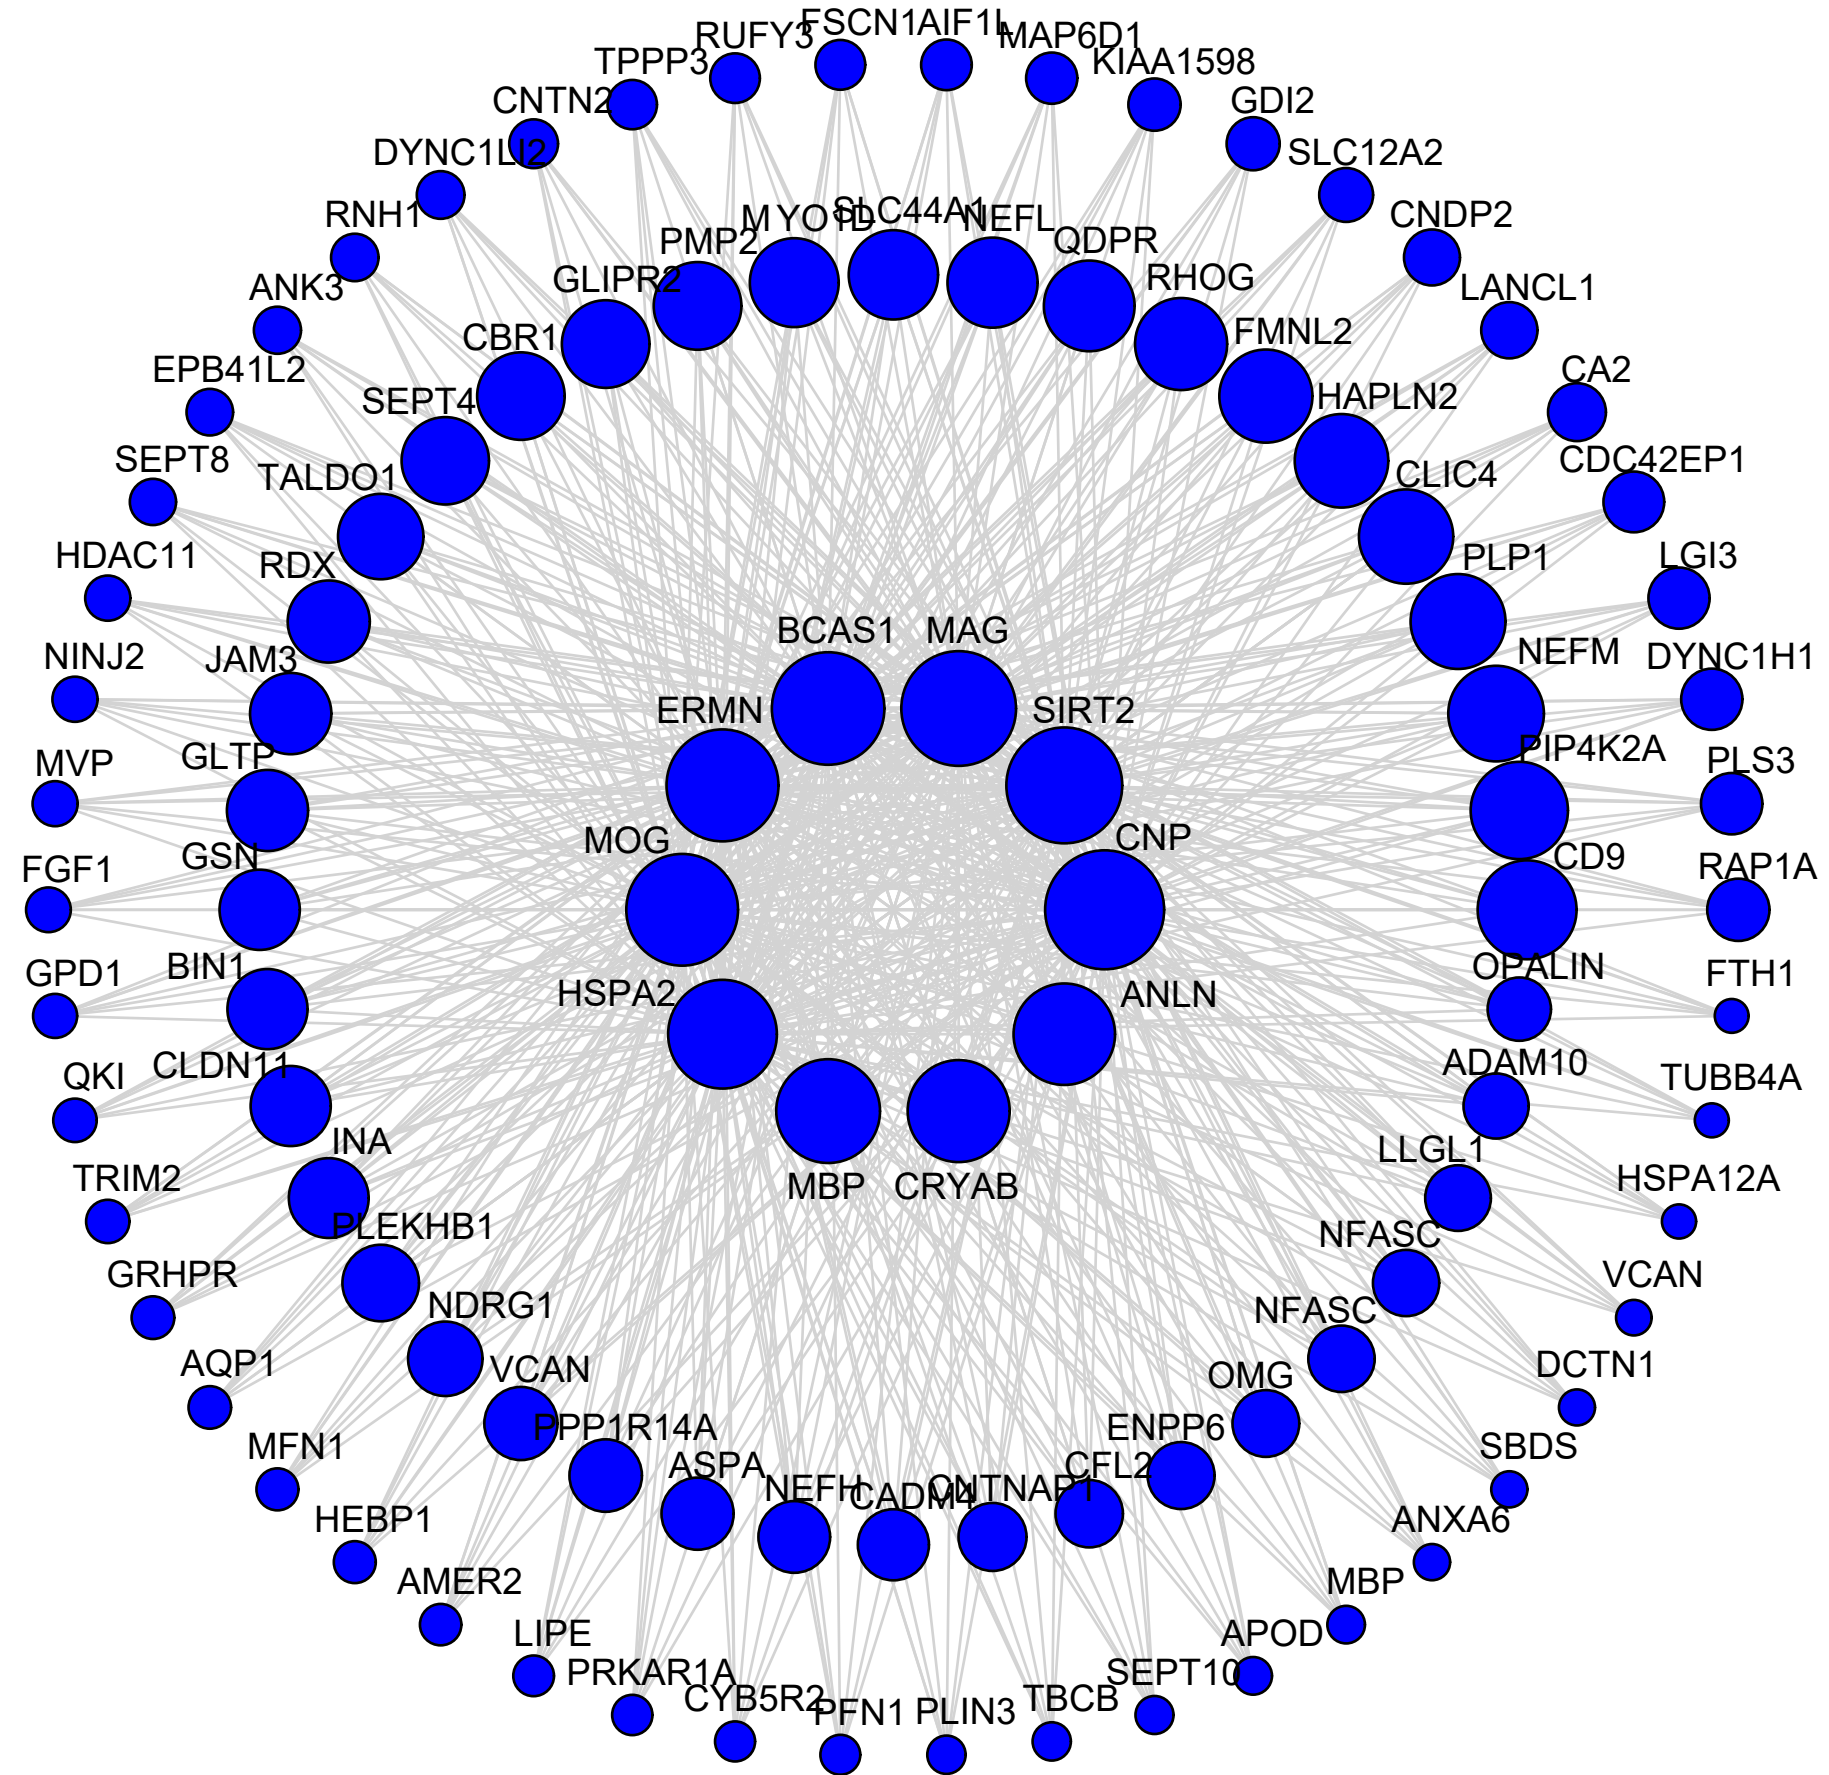



# M11 Chaperone/Protein Folding

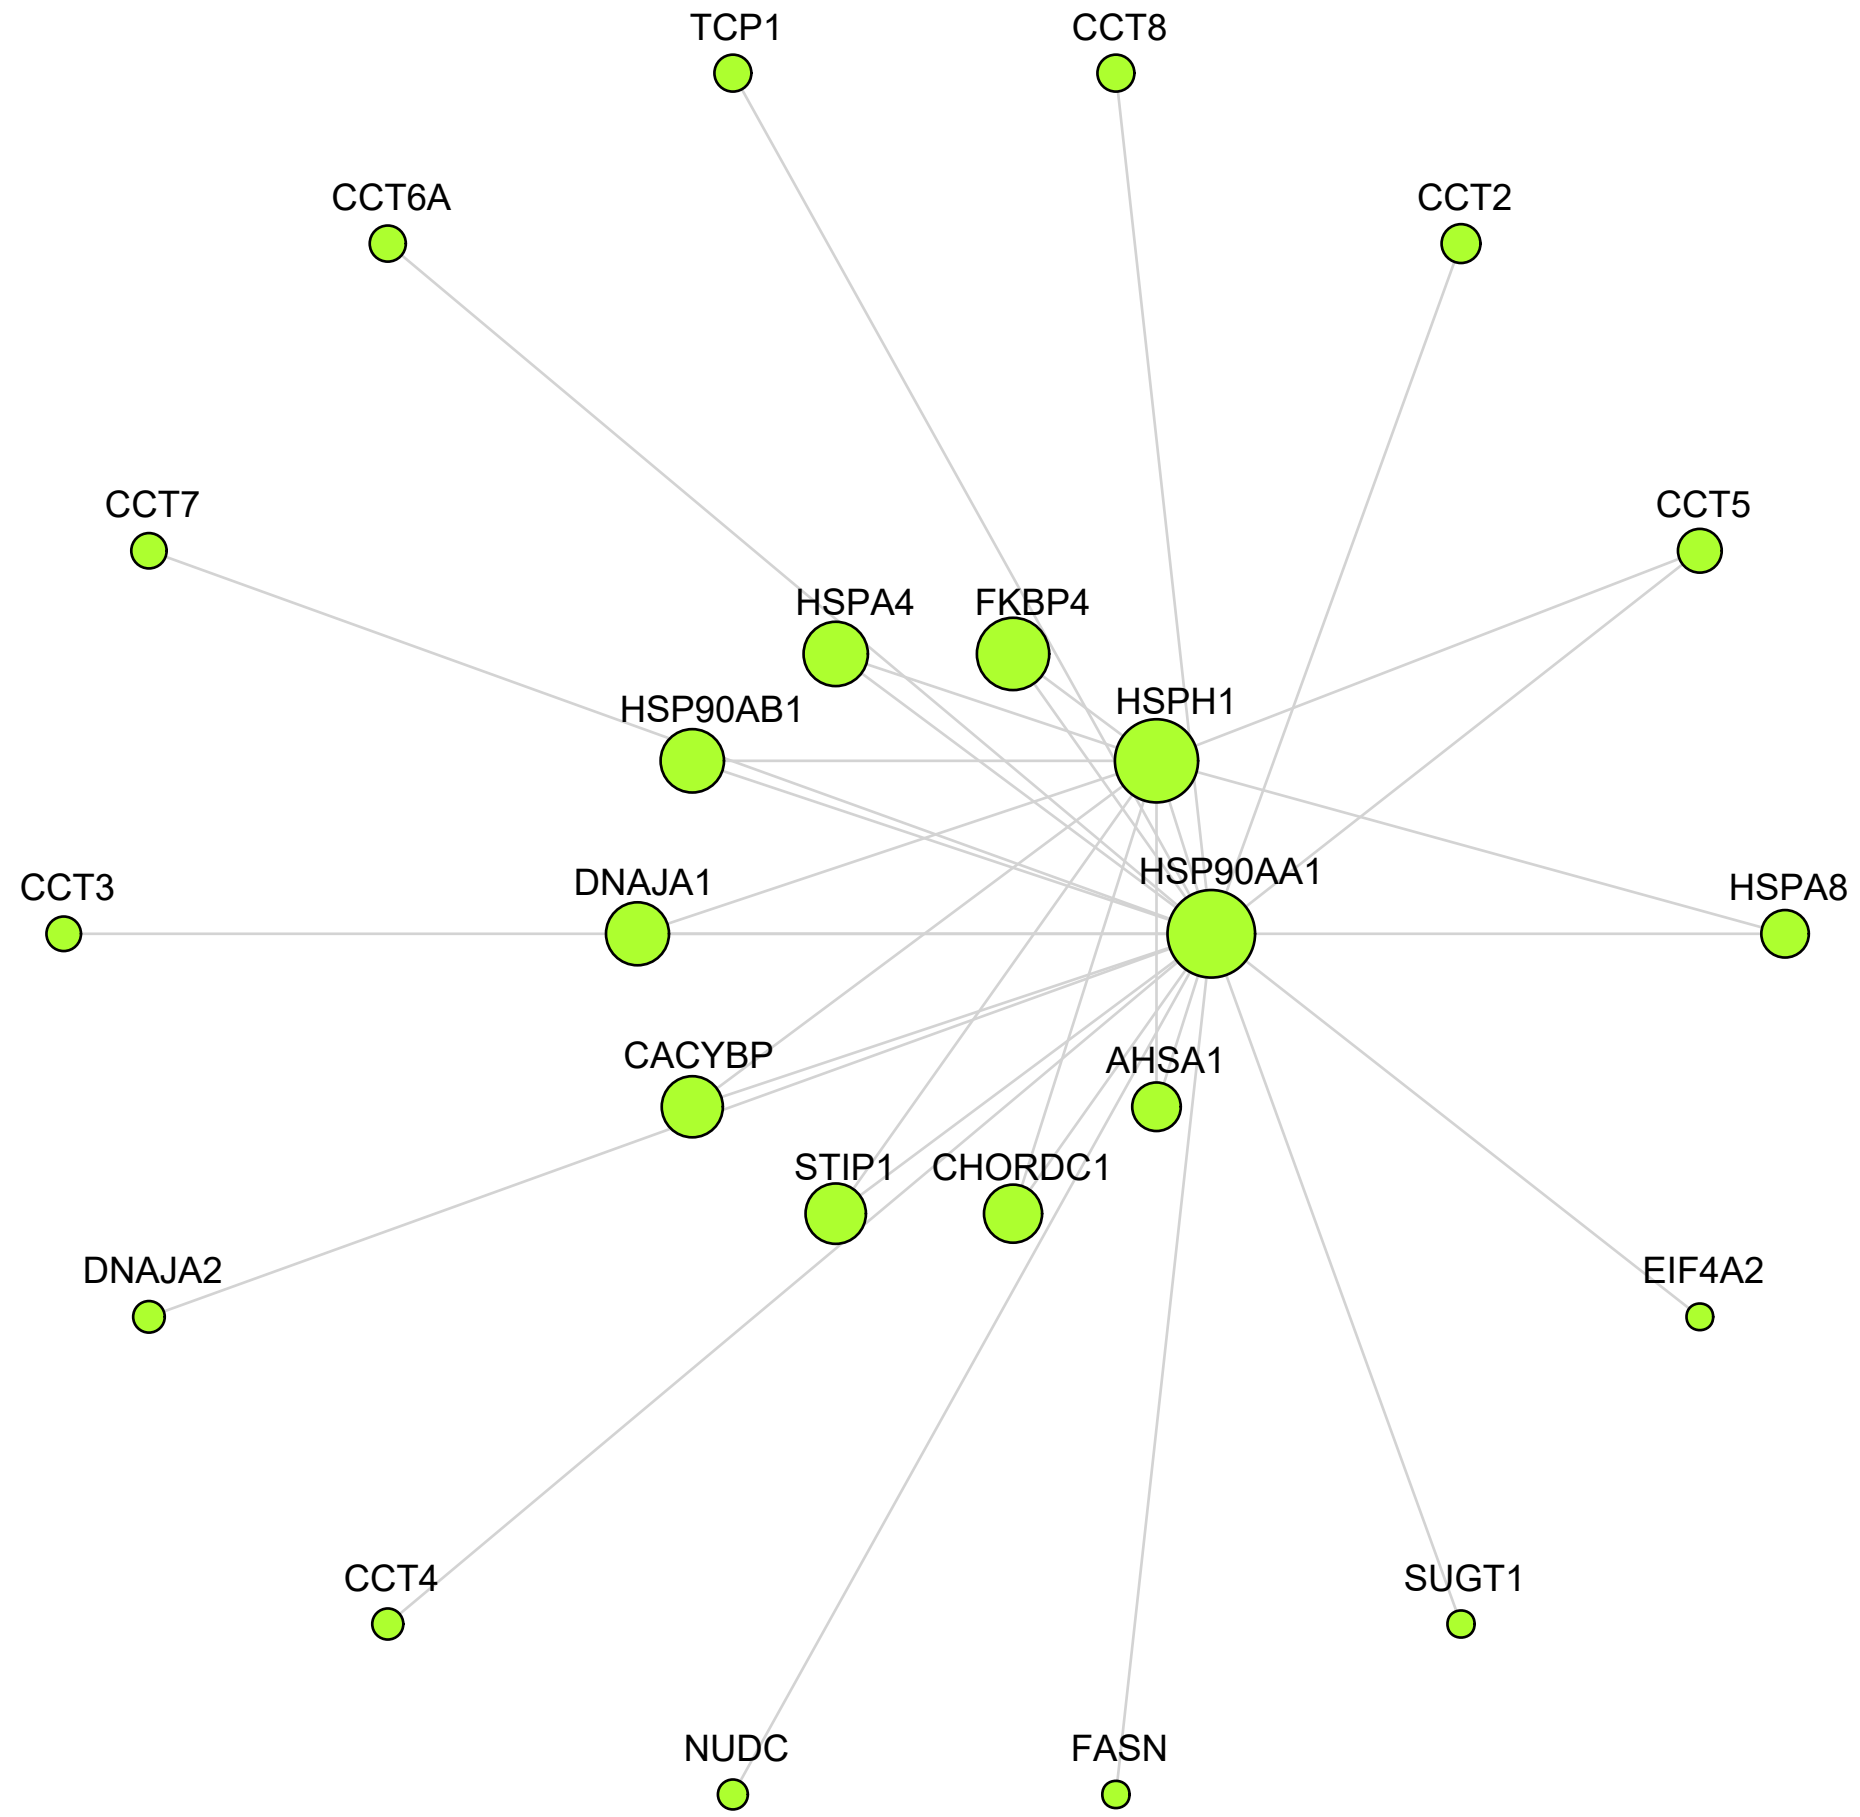

# M13 Unknown

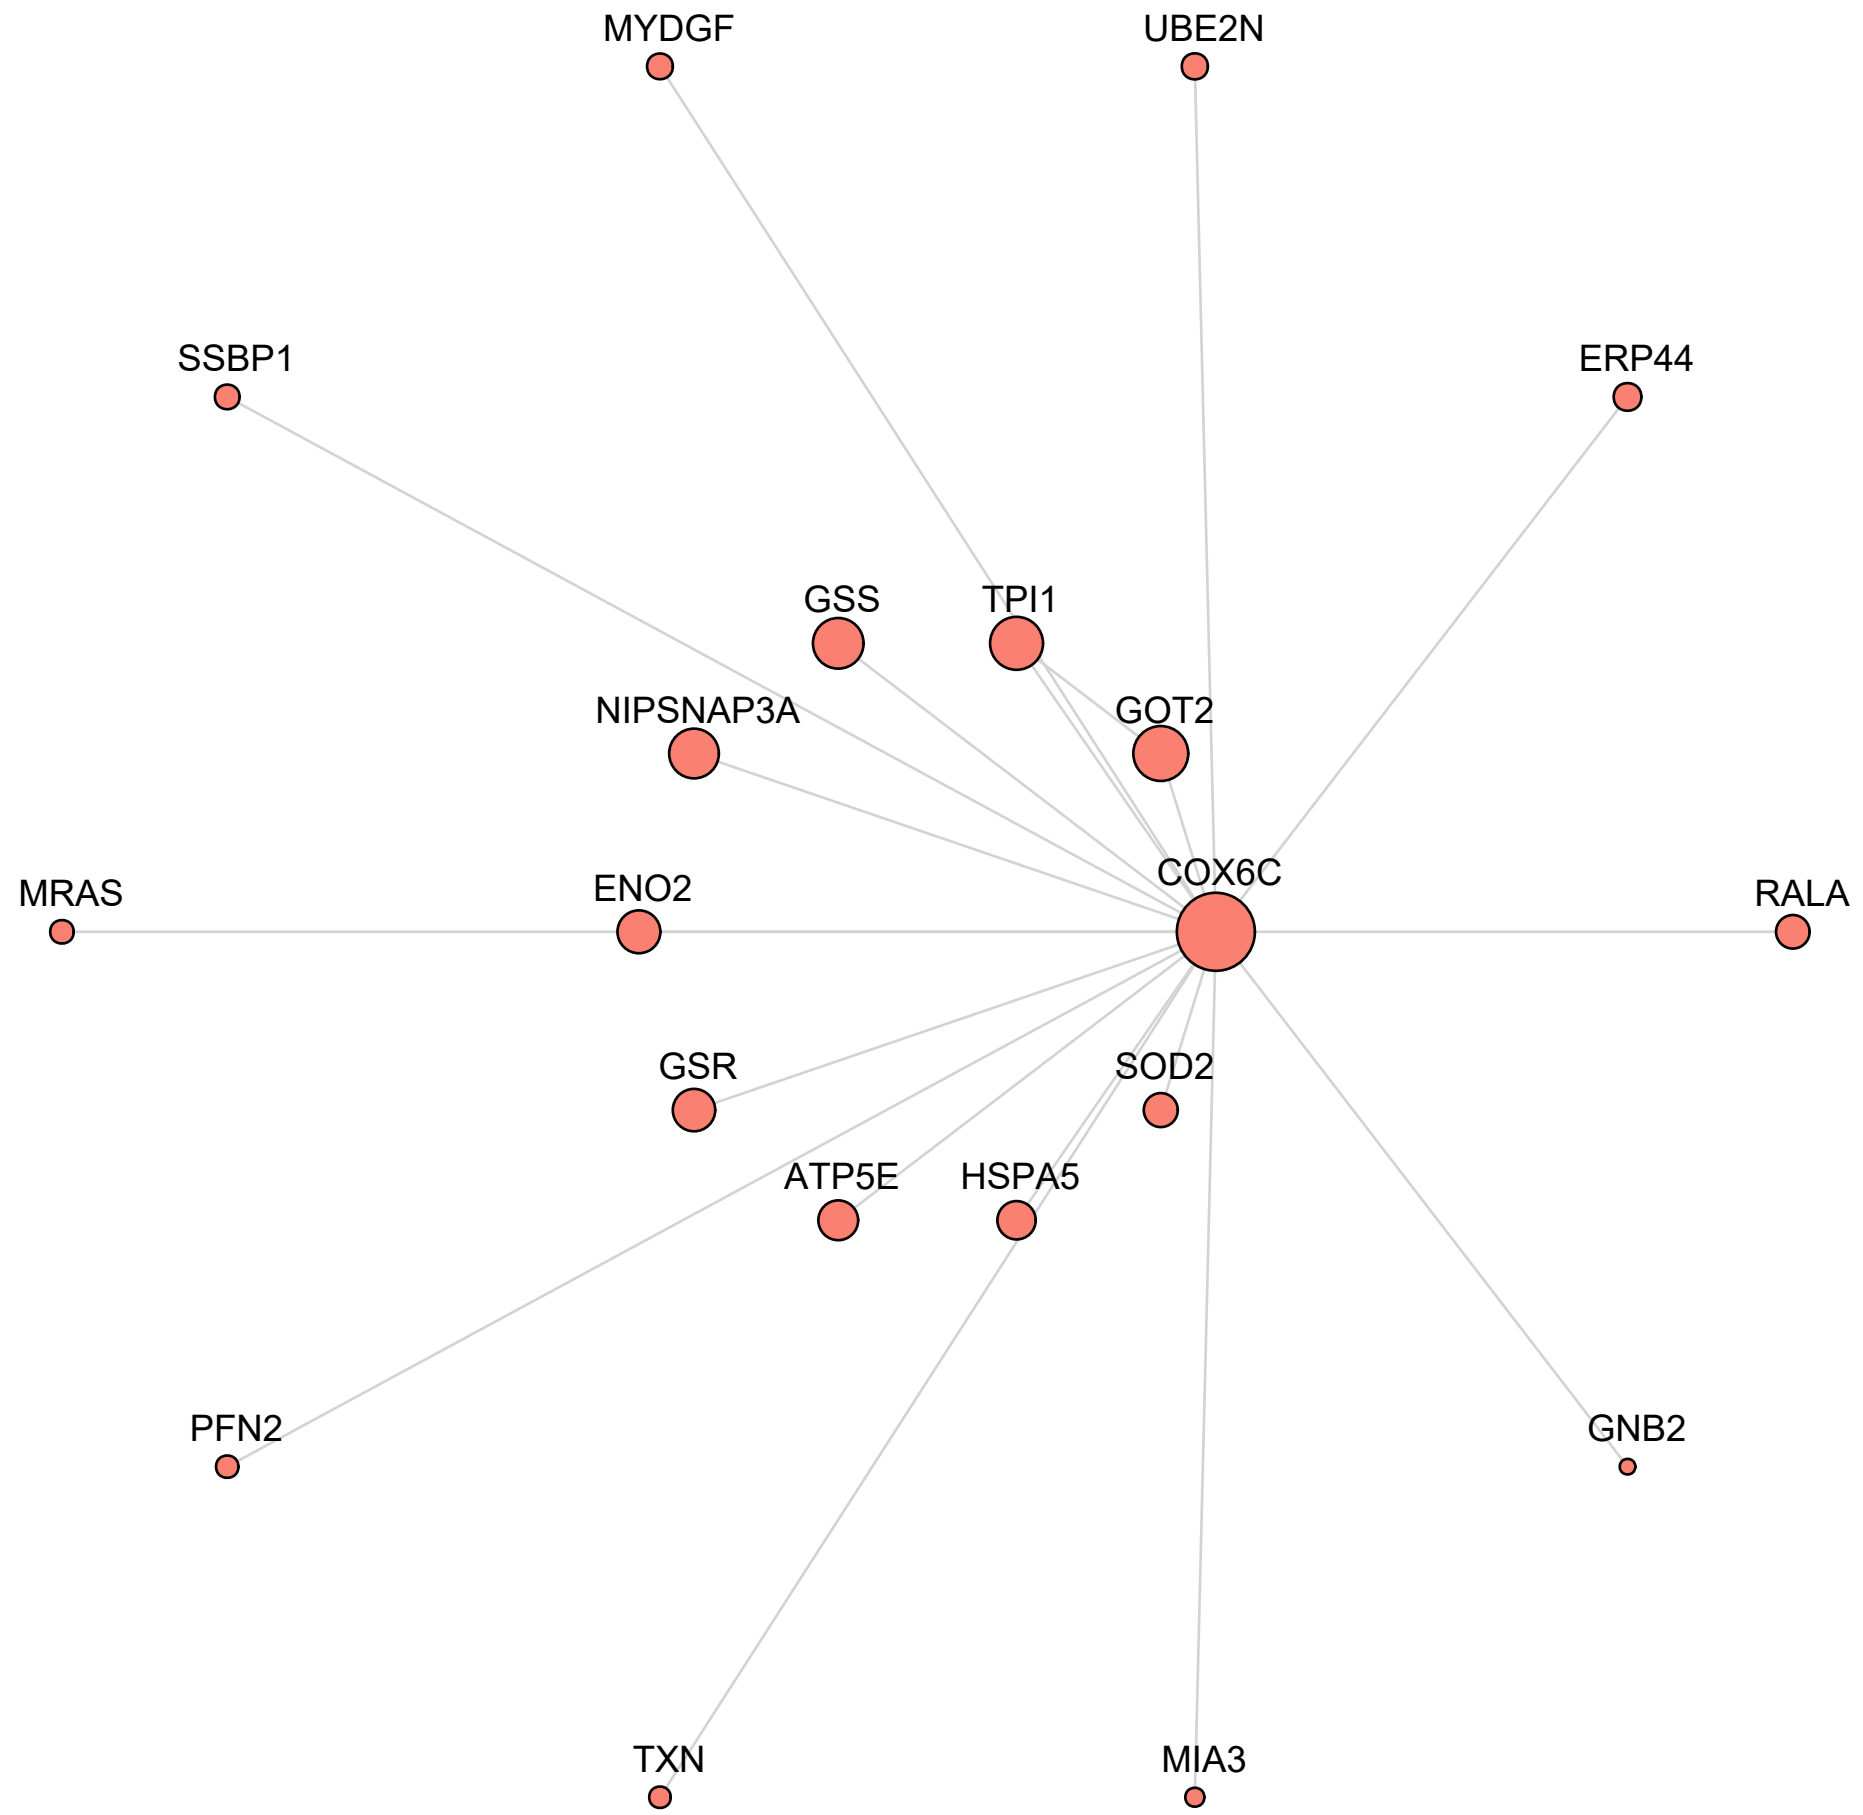

# M3 Mitochondrial

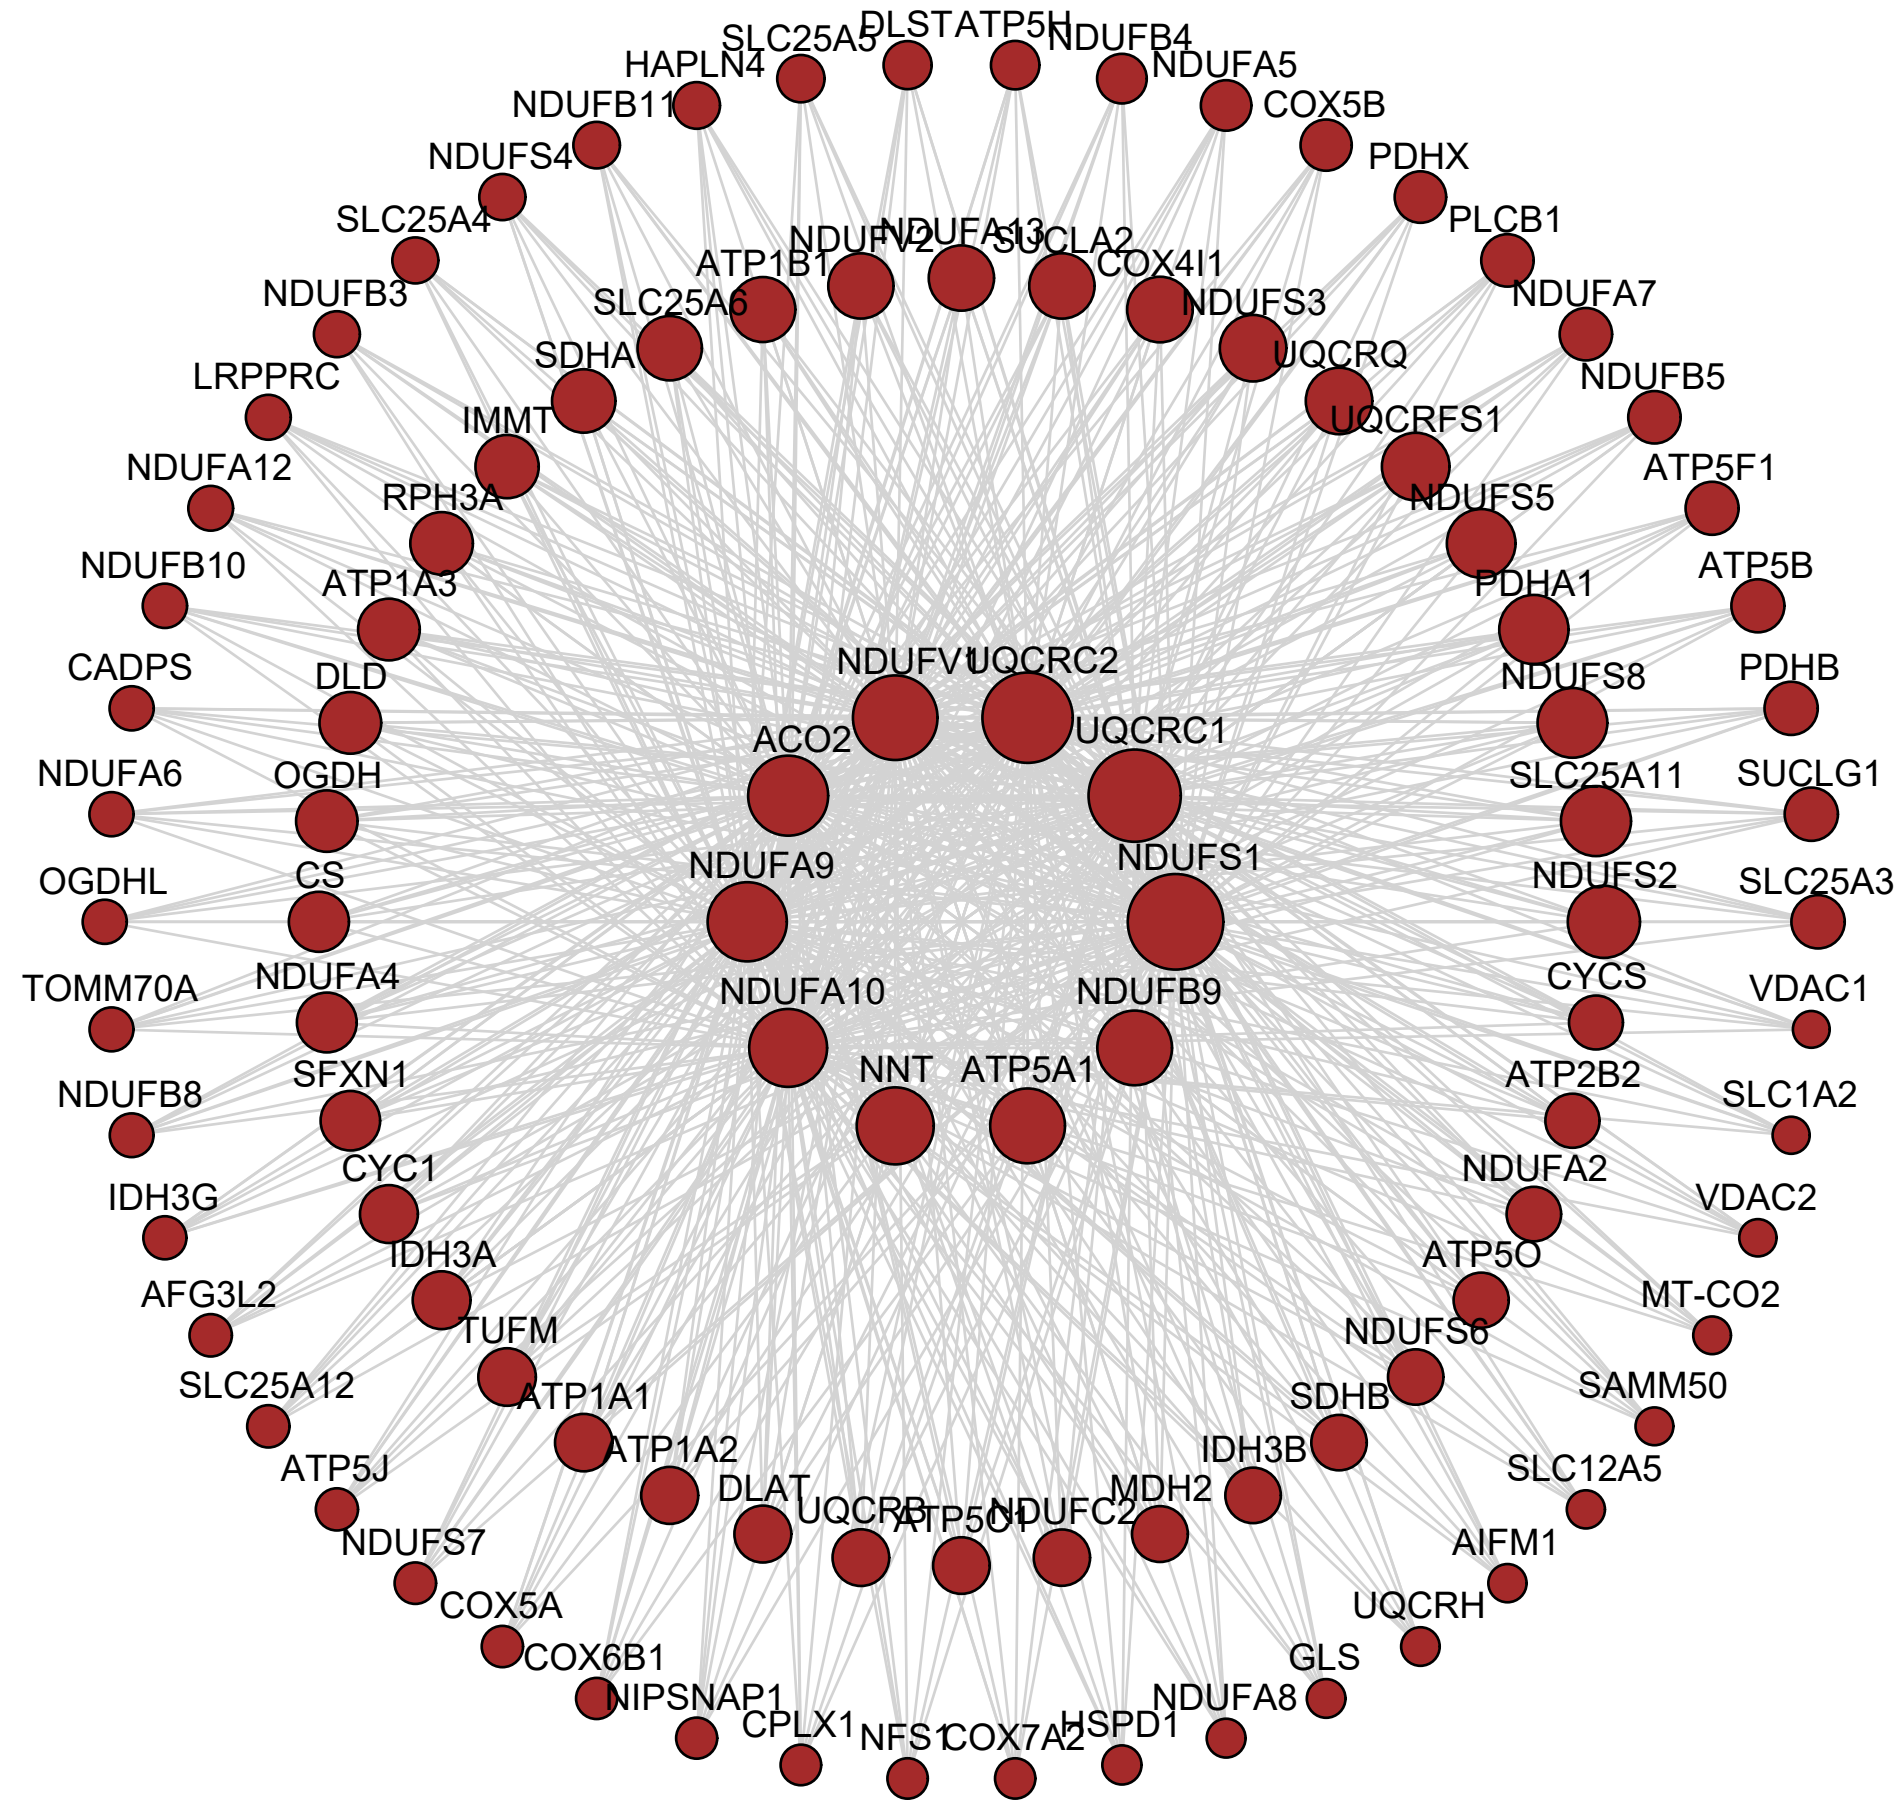



# M6 Cytoskeleton

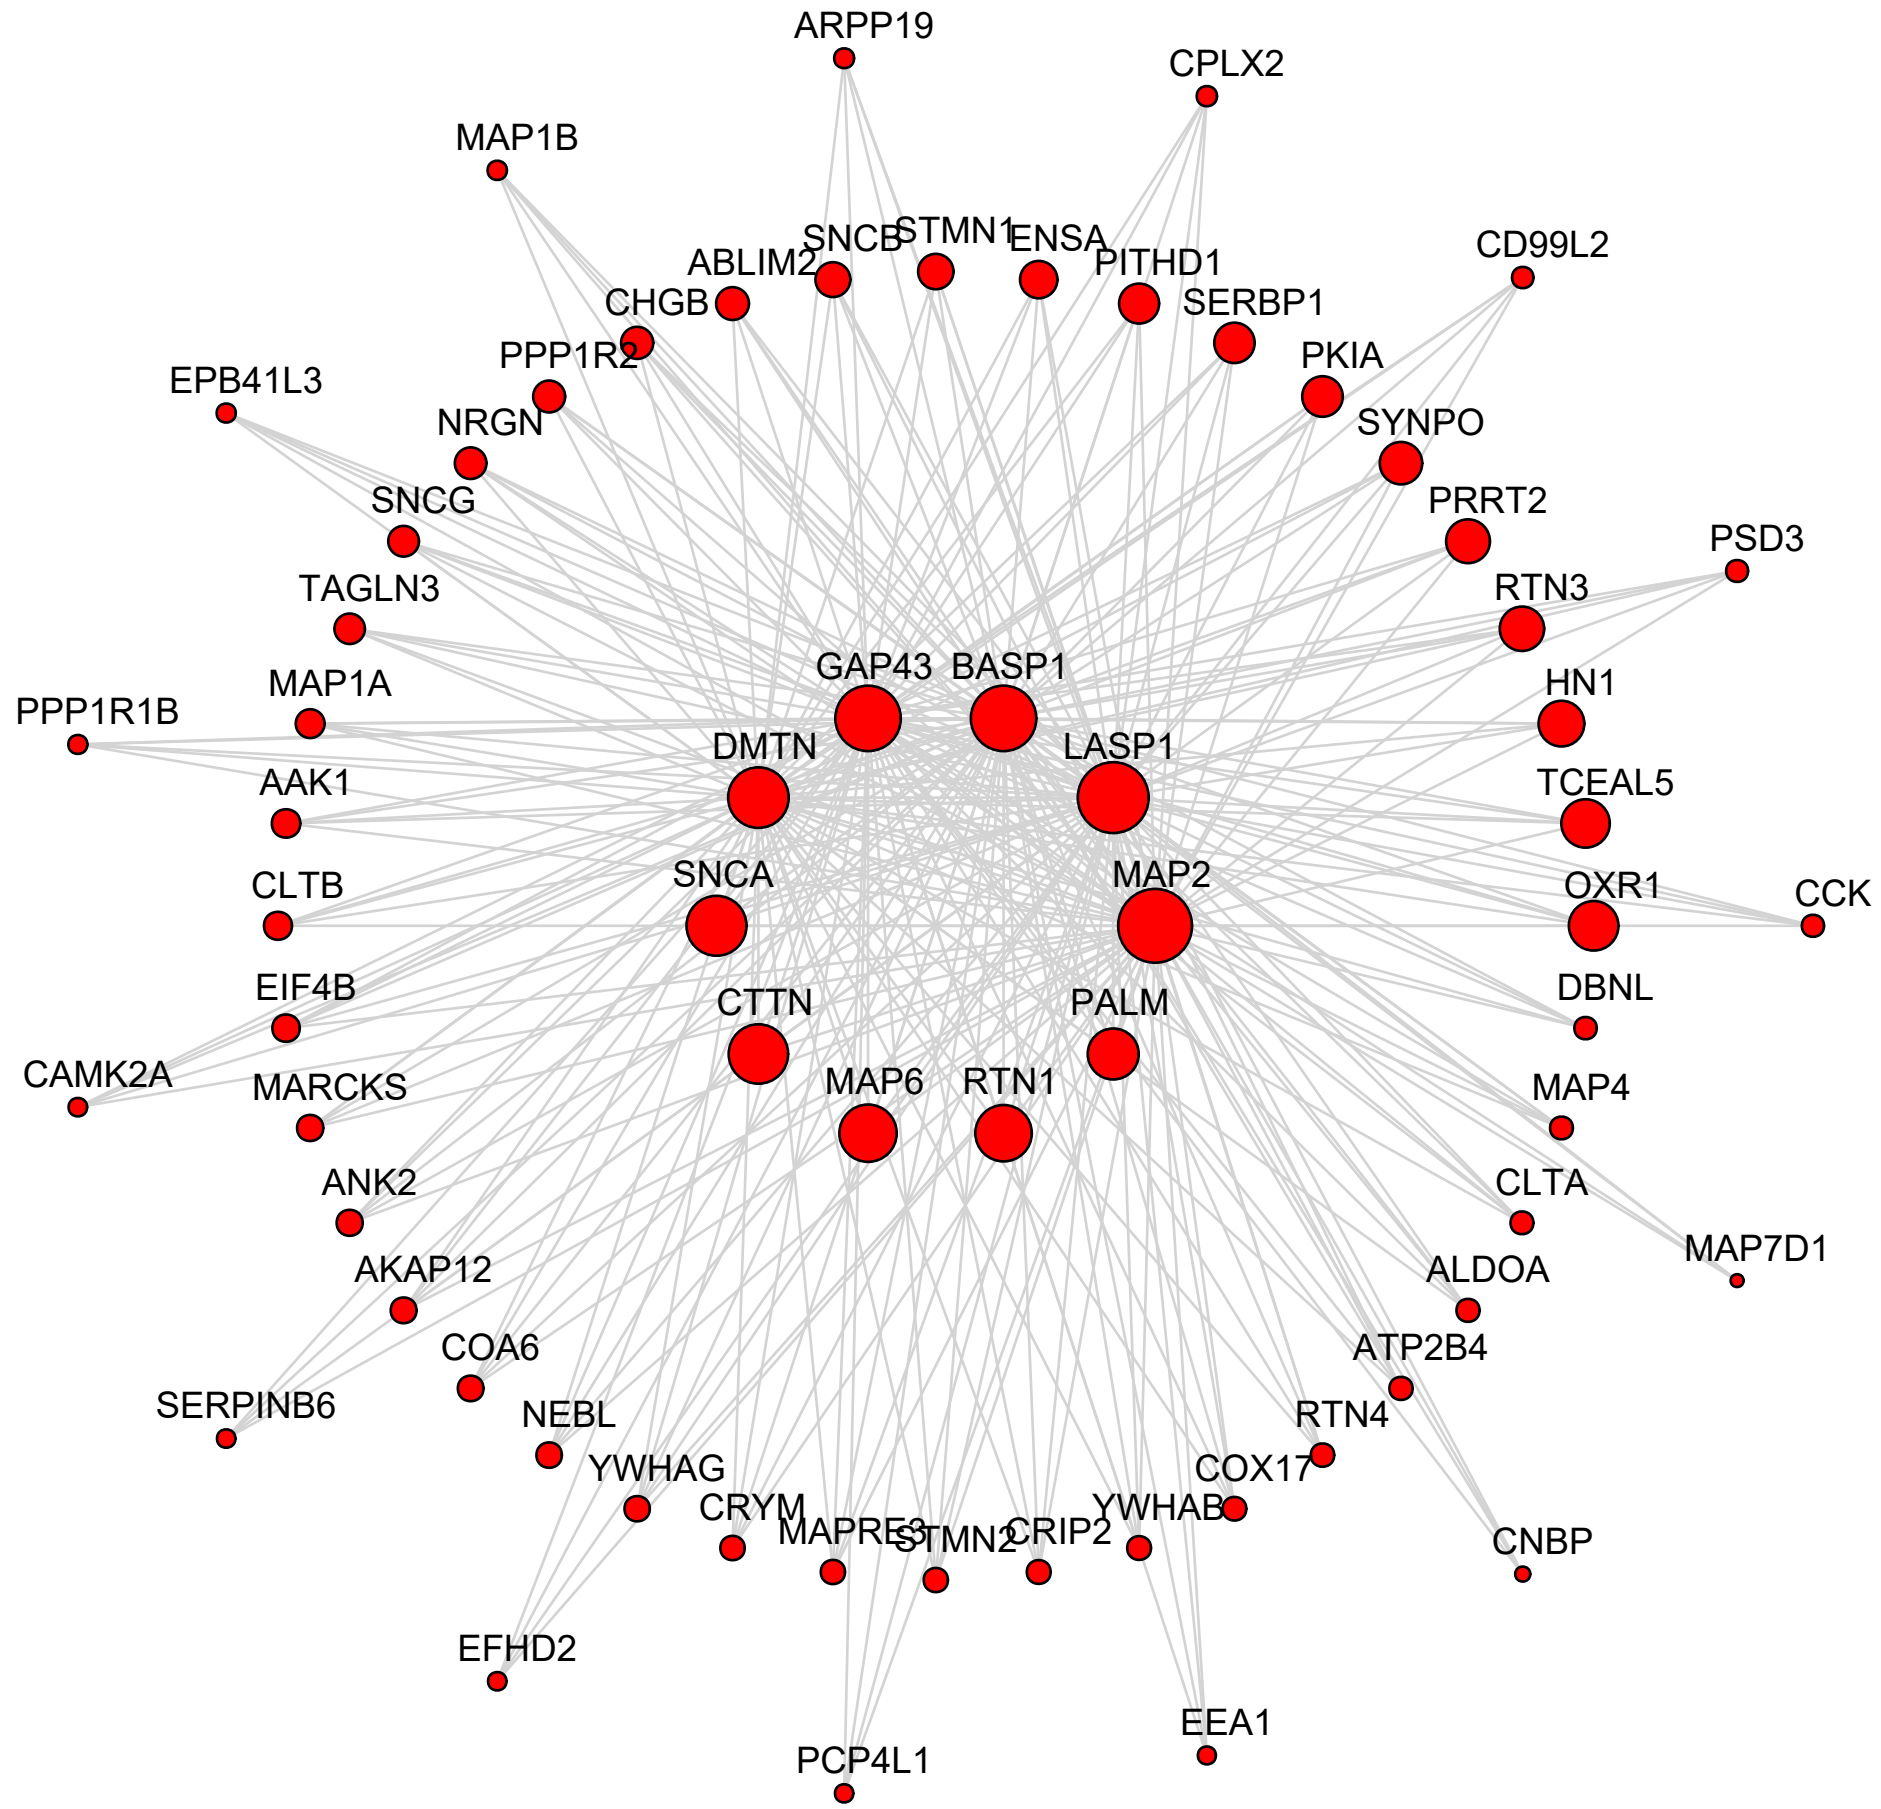

# M1 Synapse

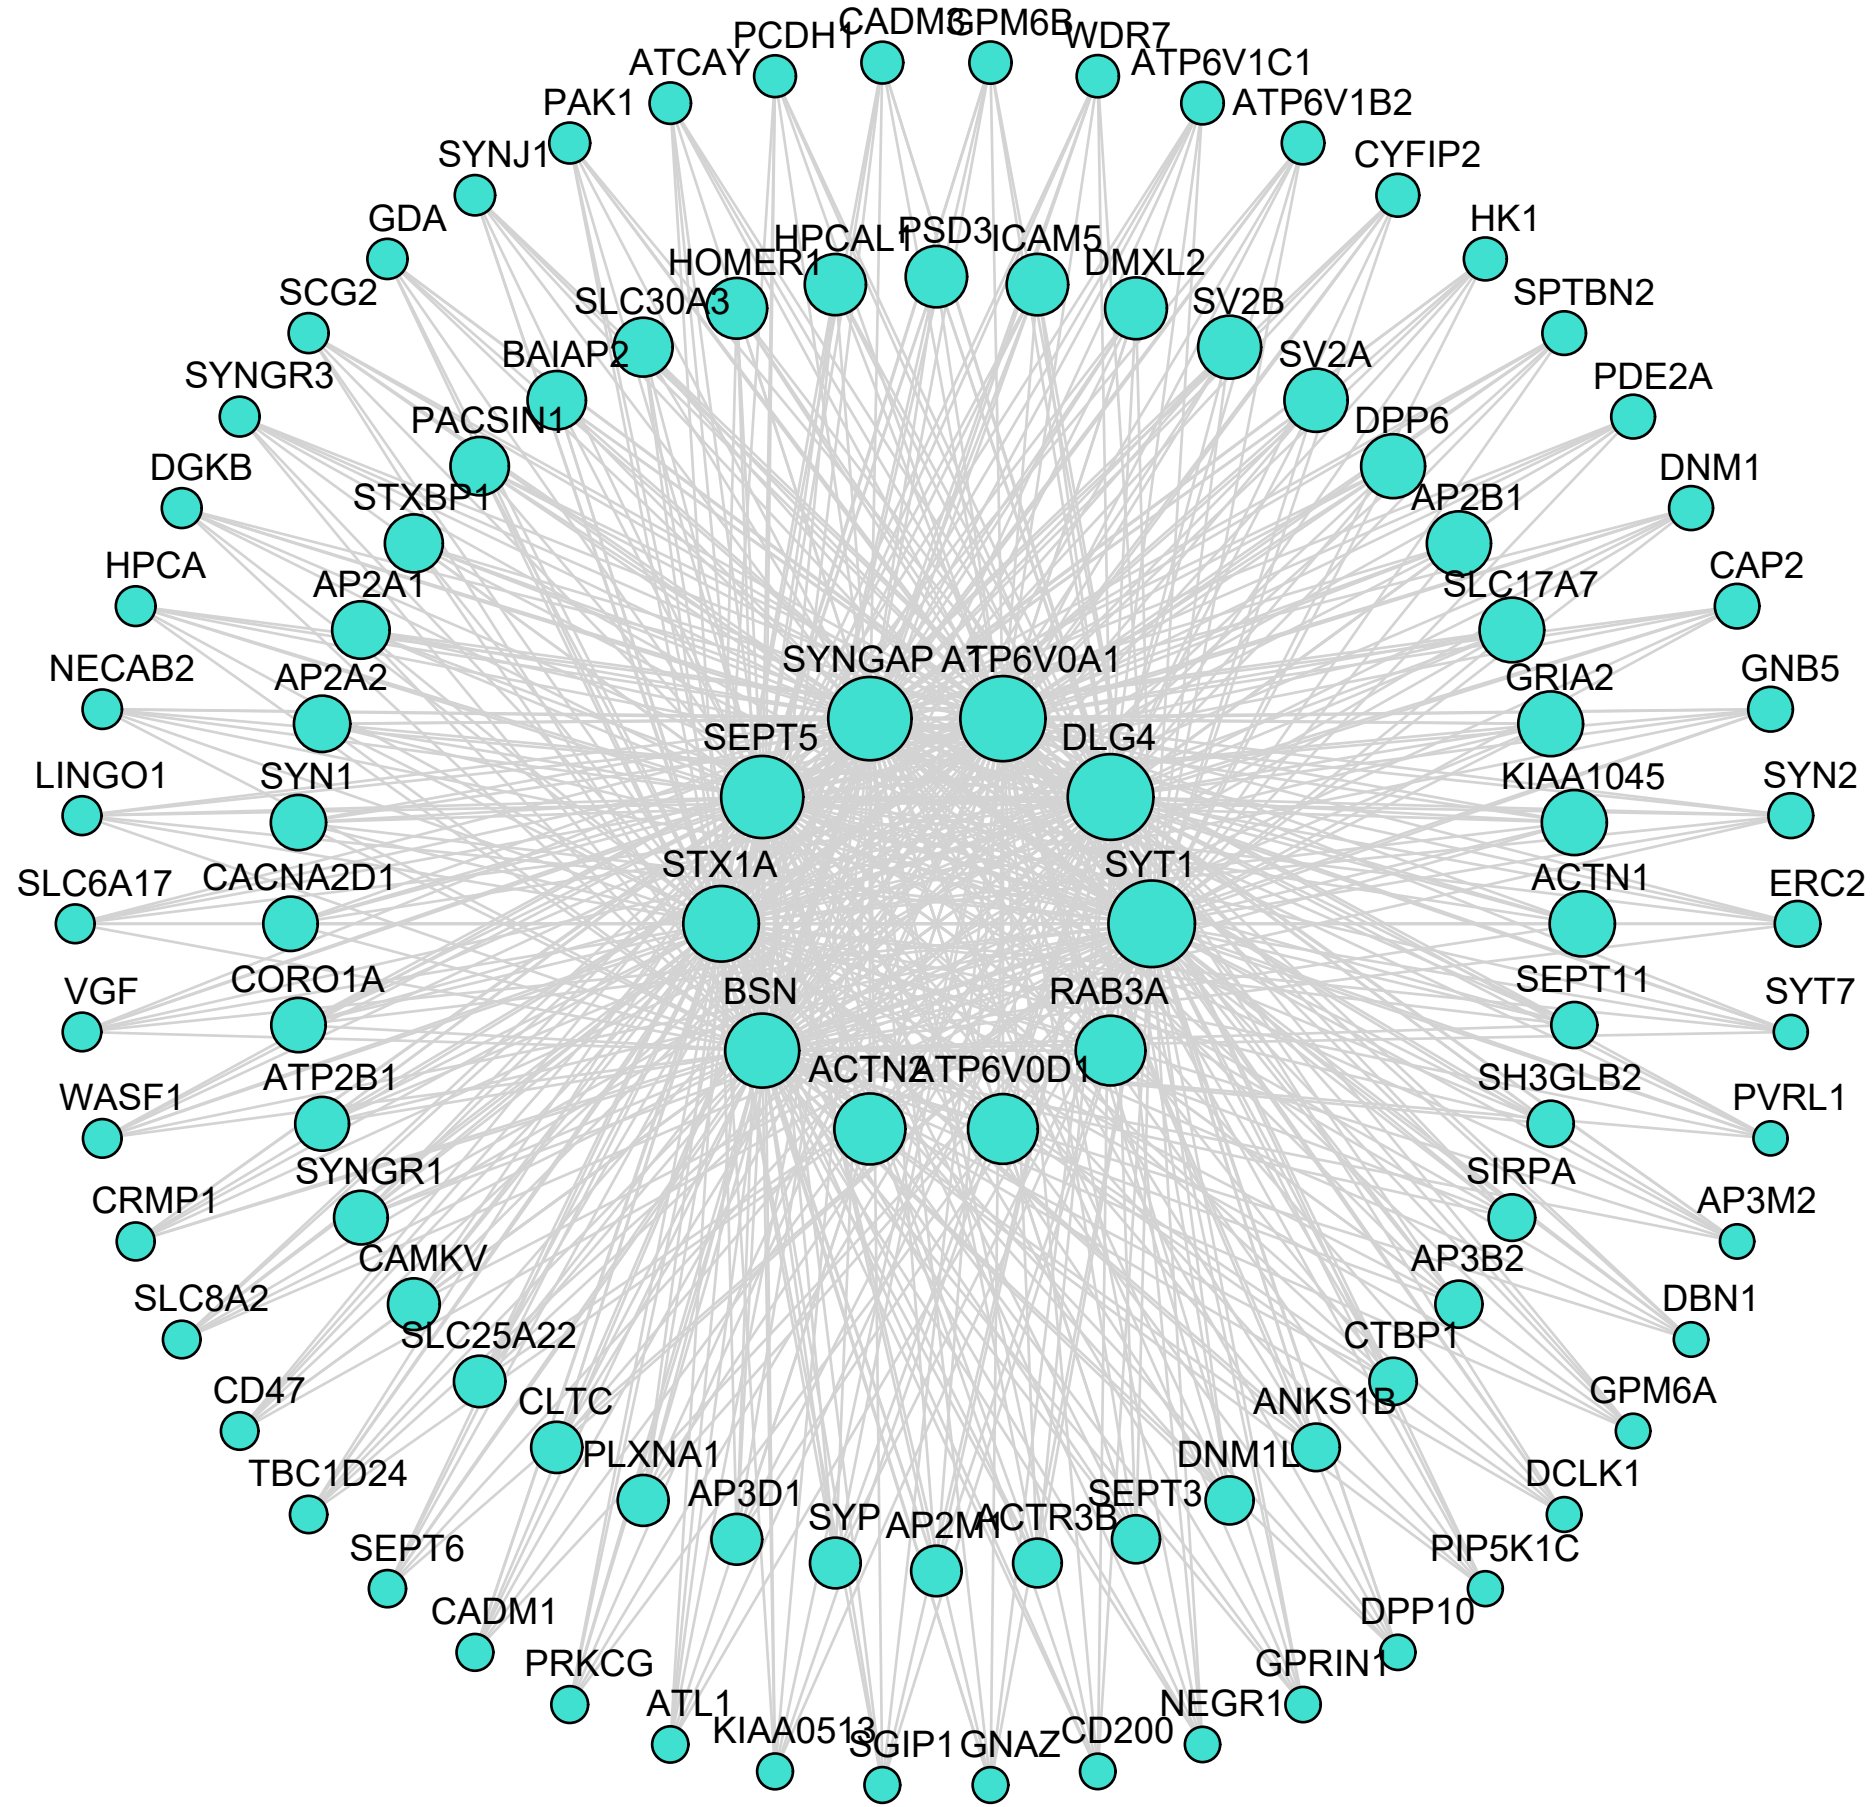

# M12 Unknown

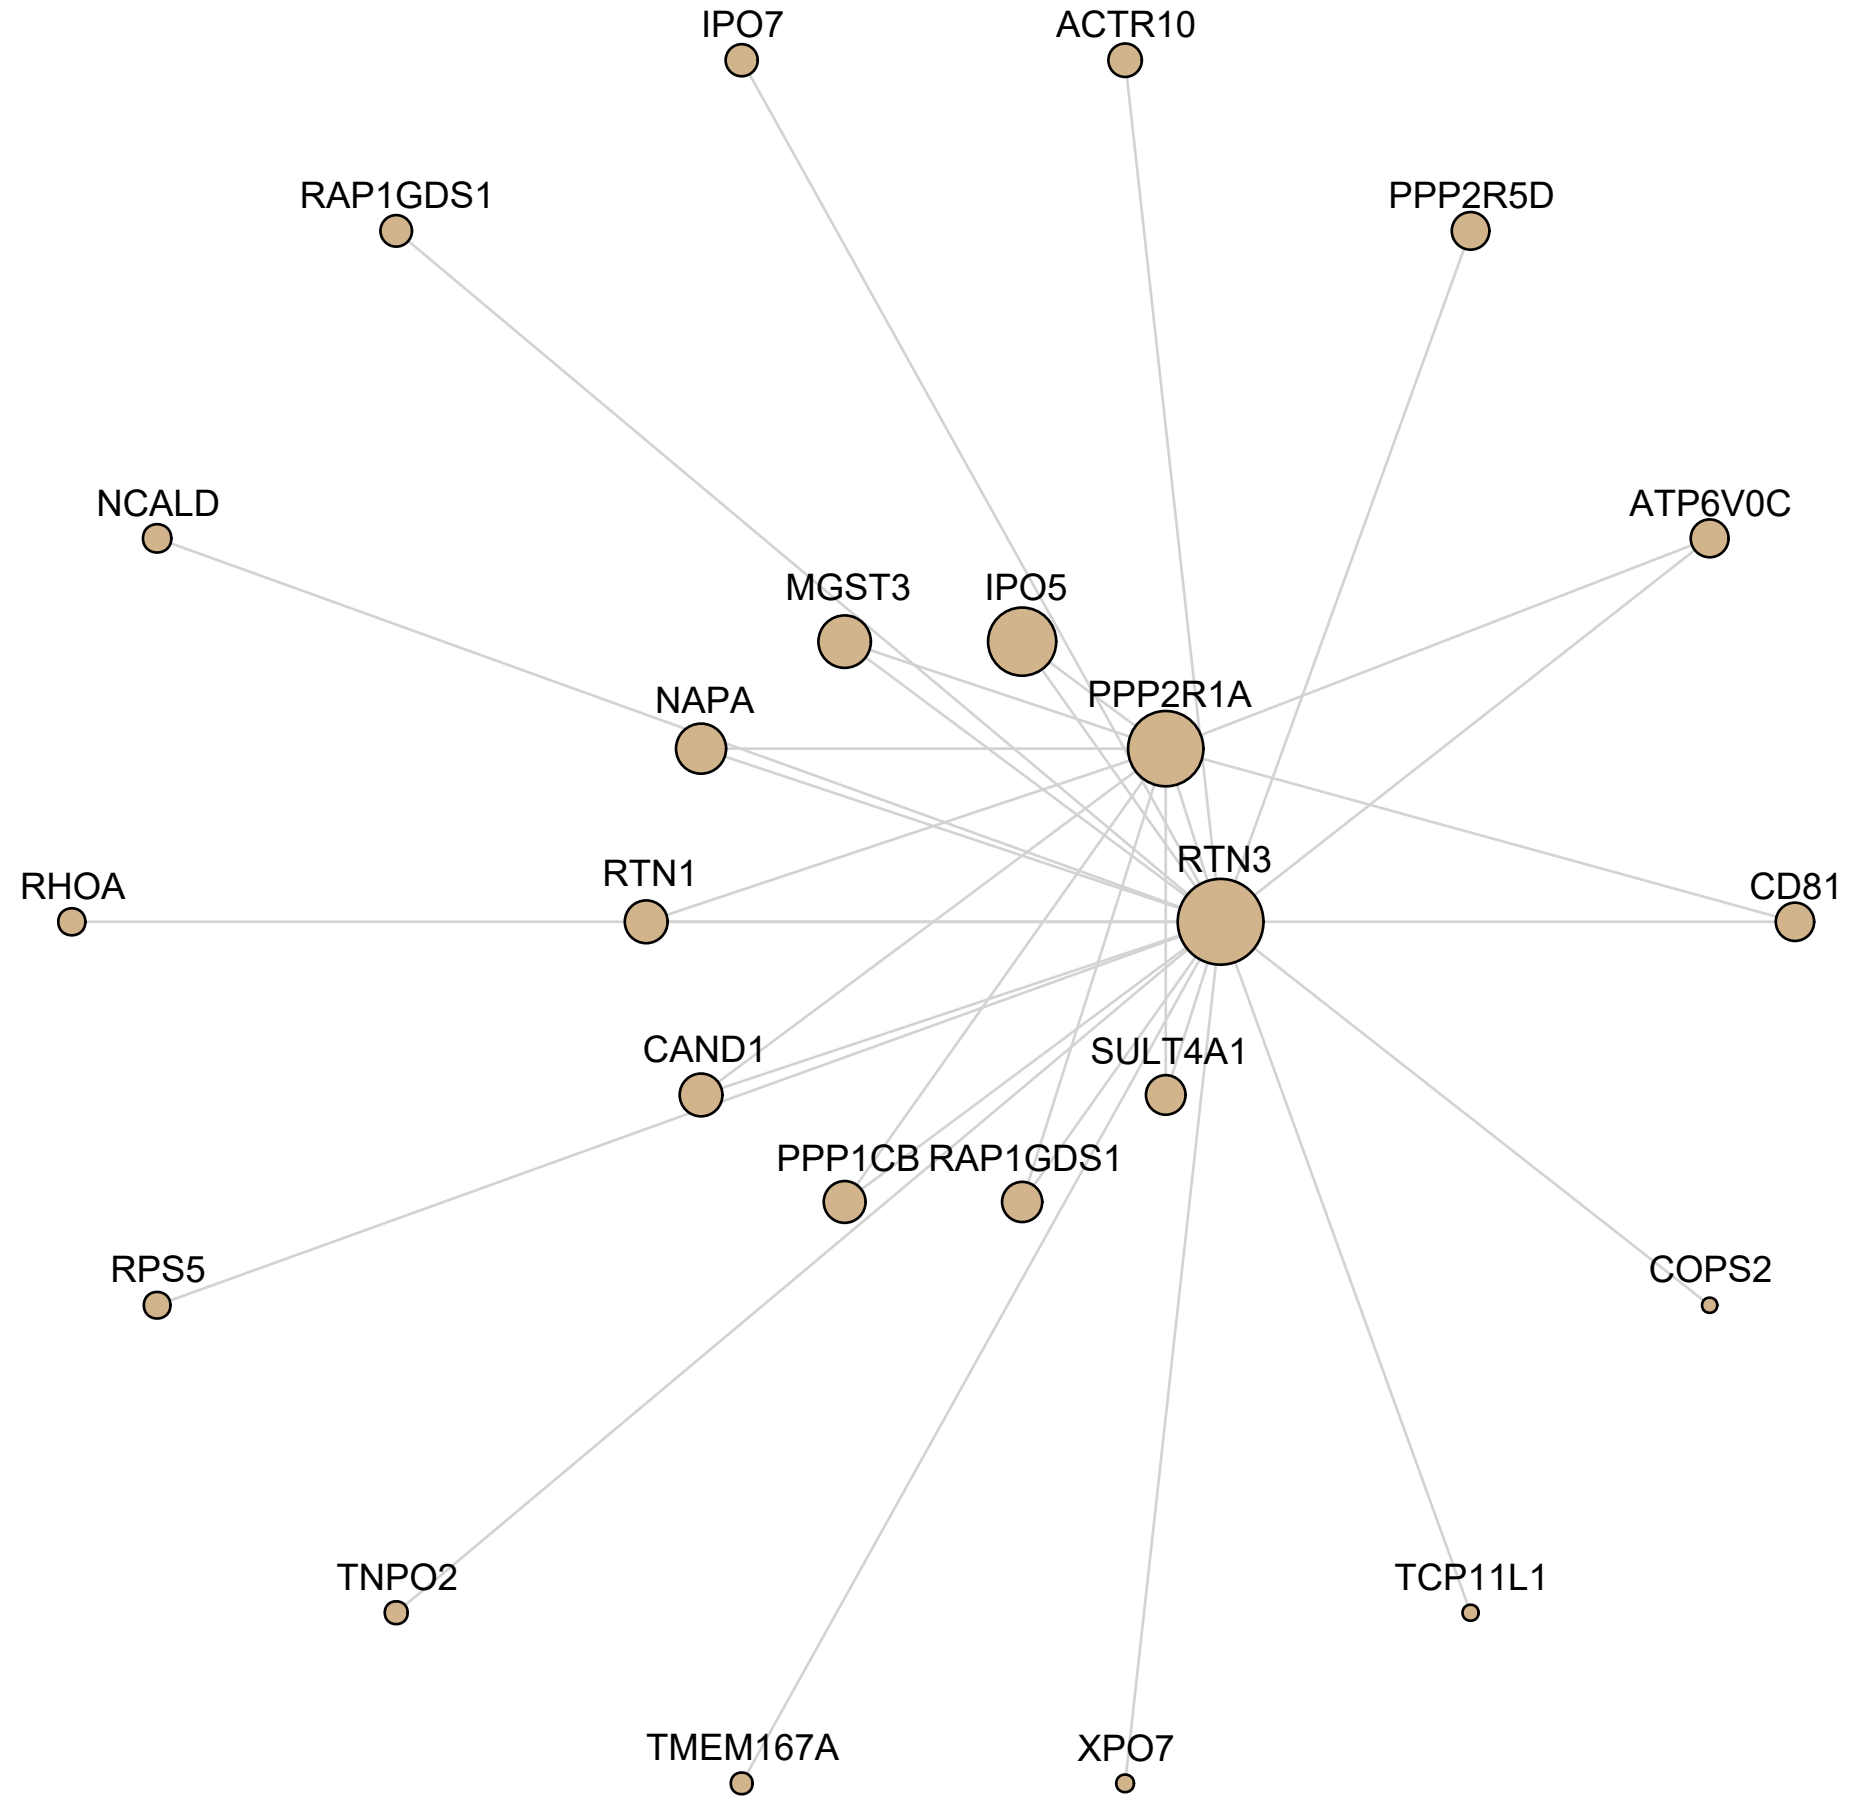

# M7 Translation/Ribosome

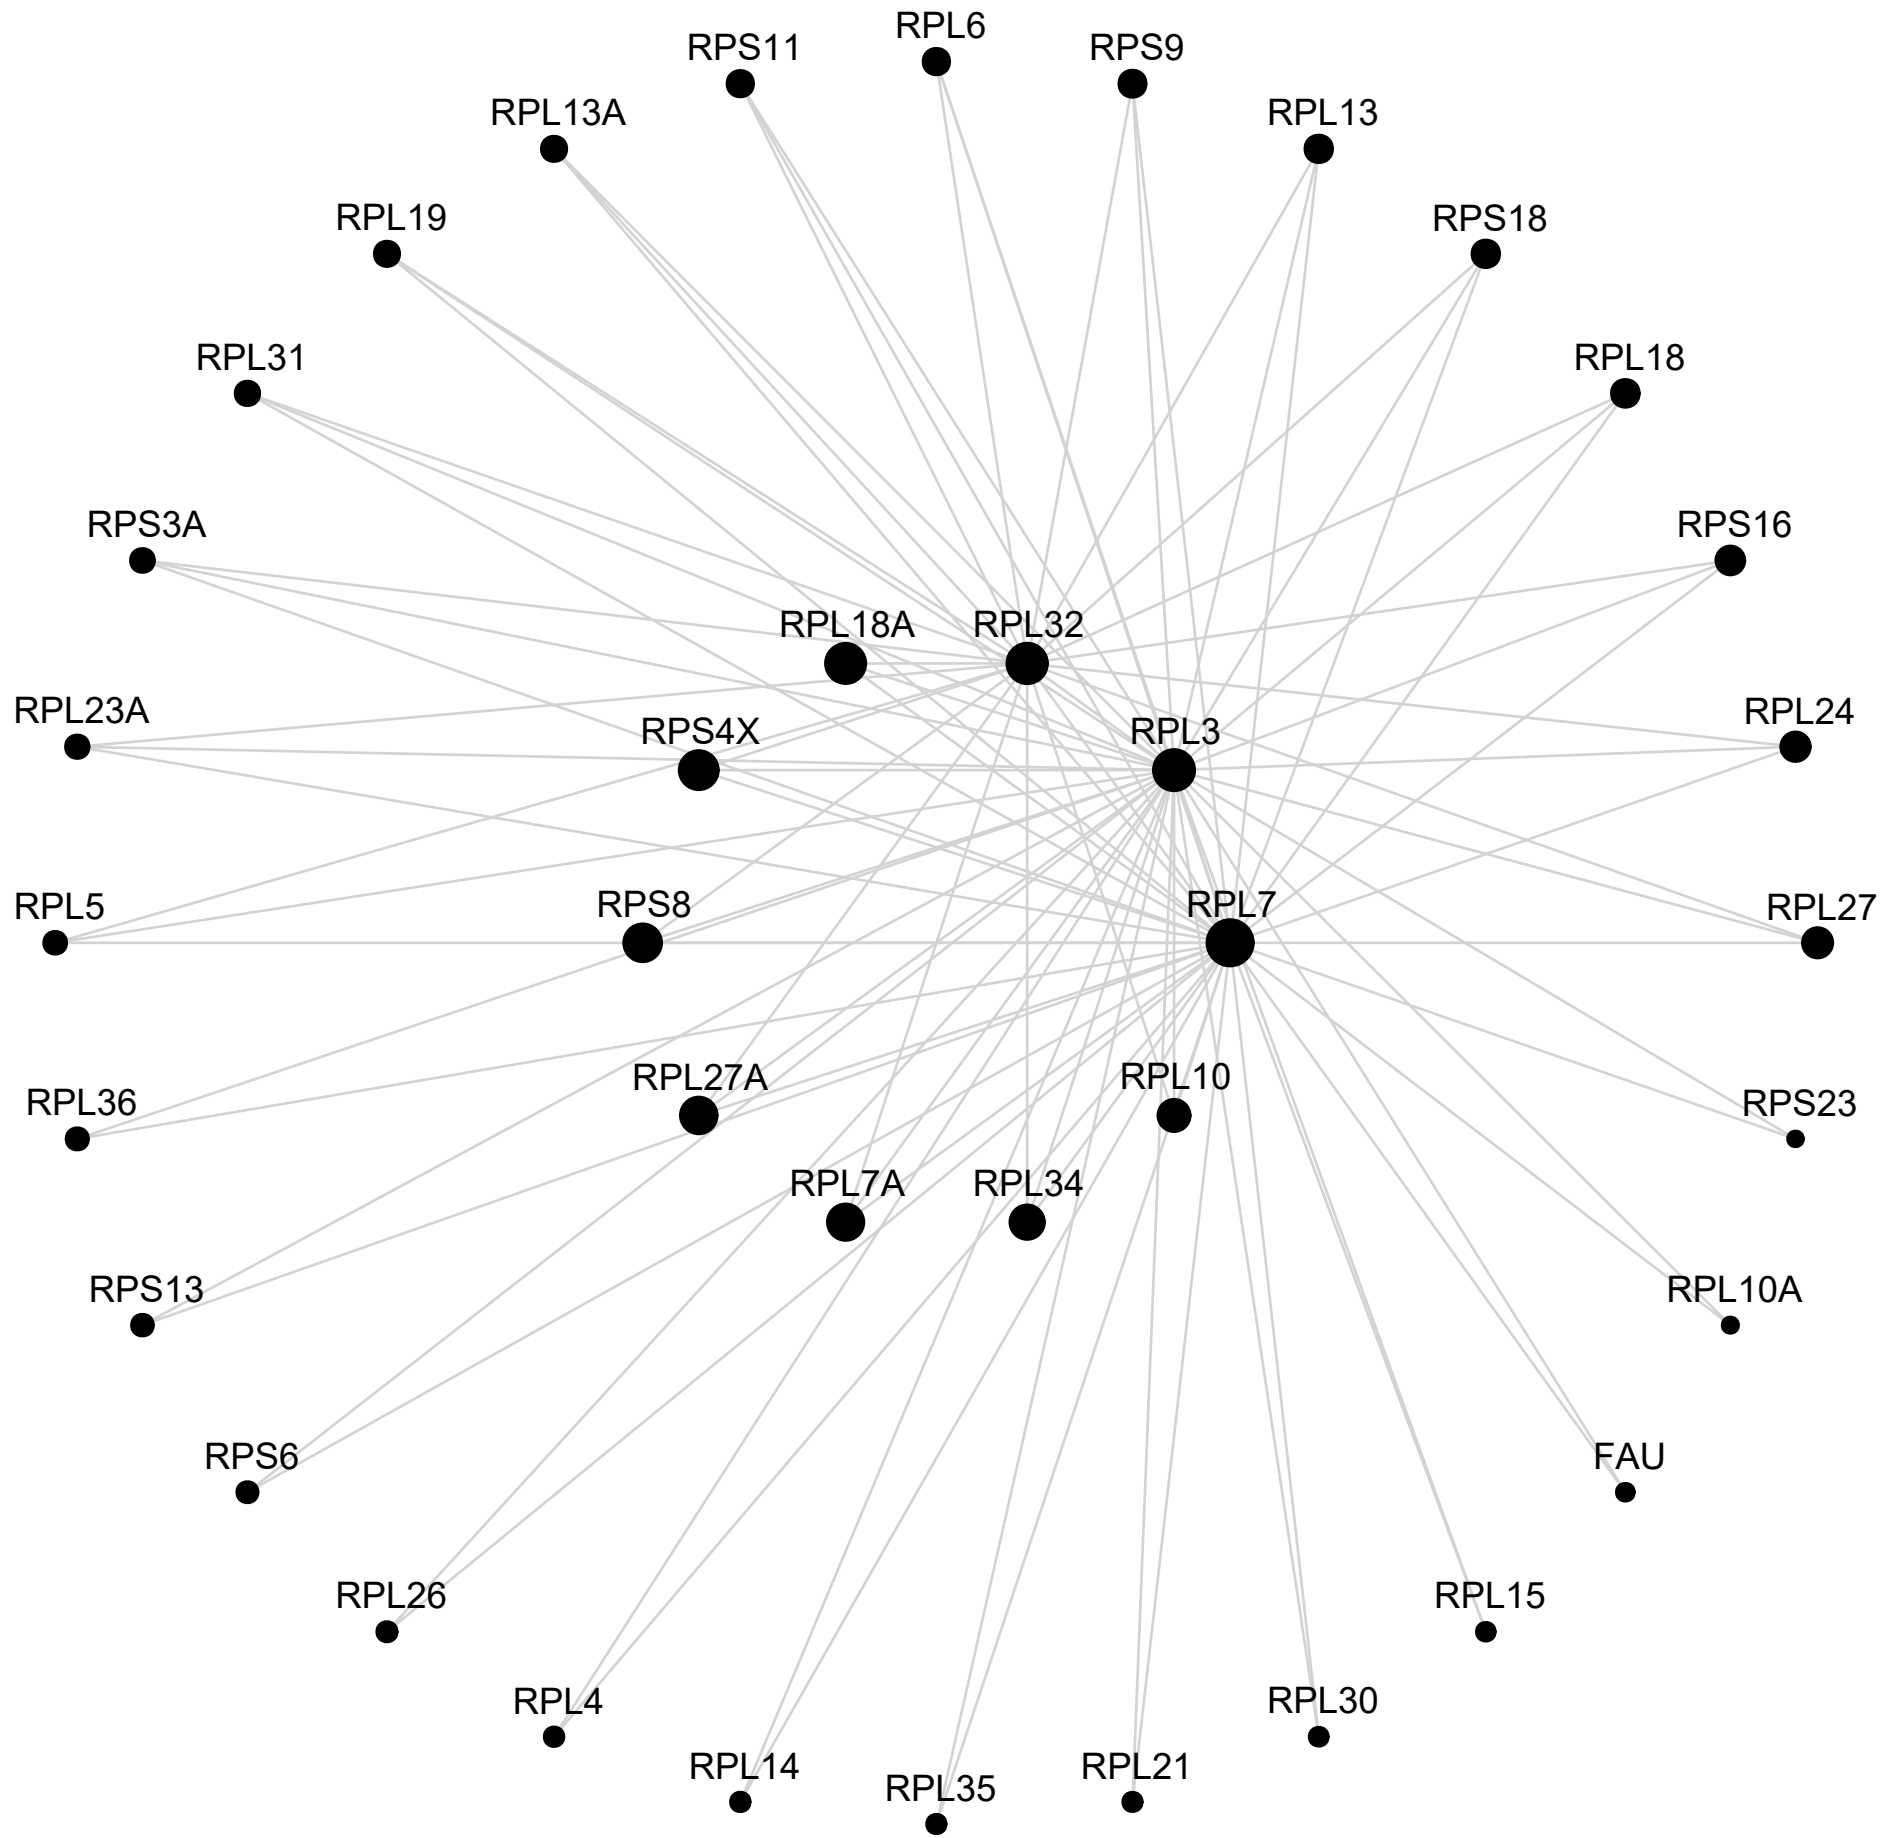

# M9 Translation/Ribosome

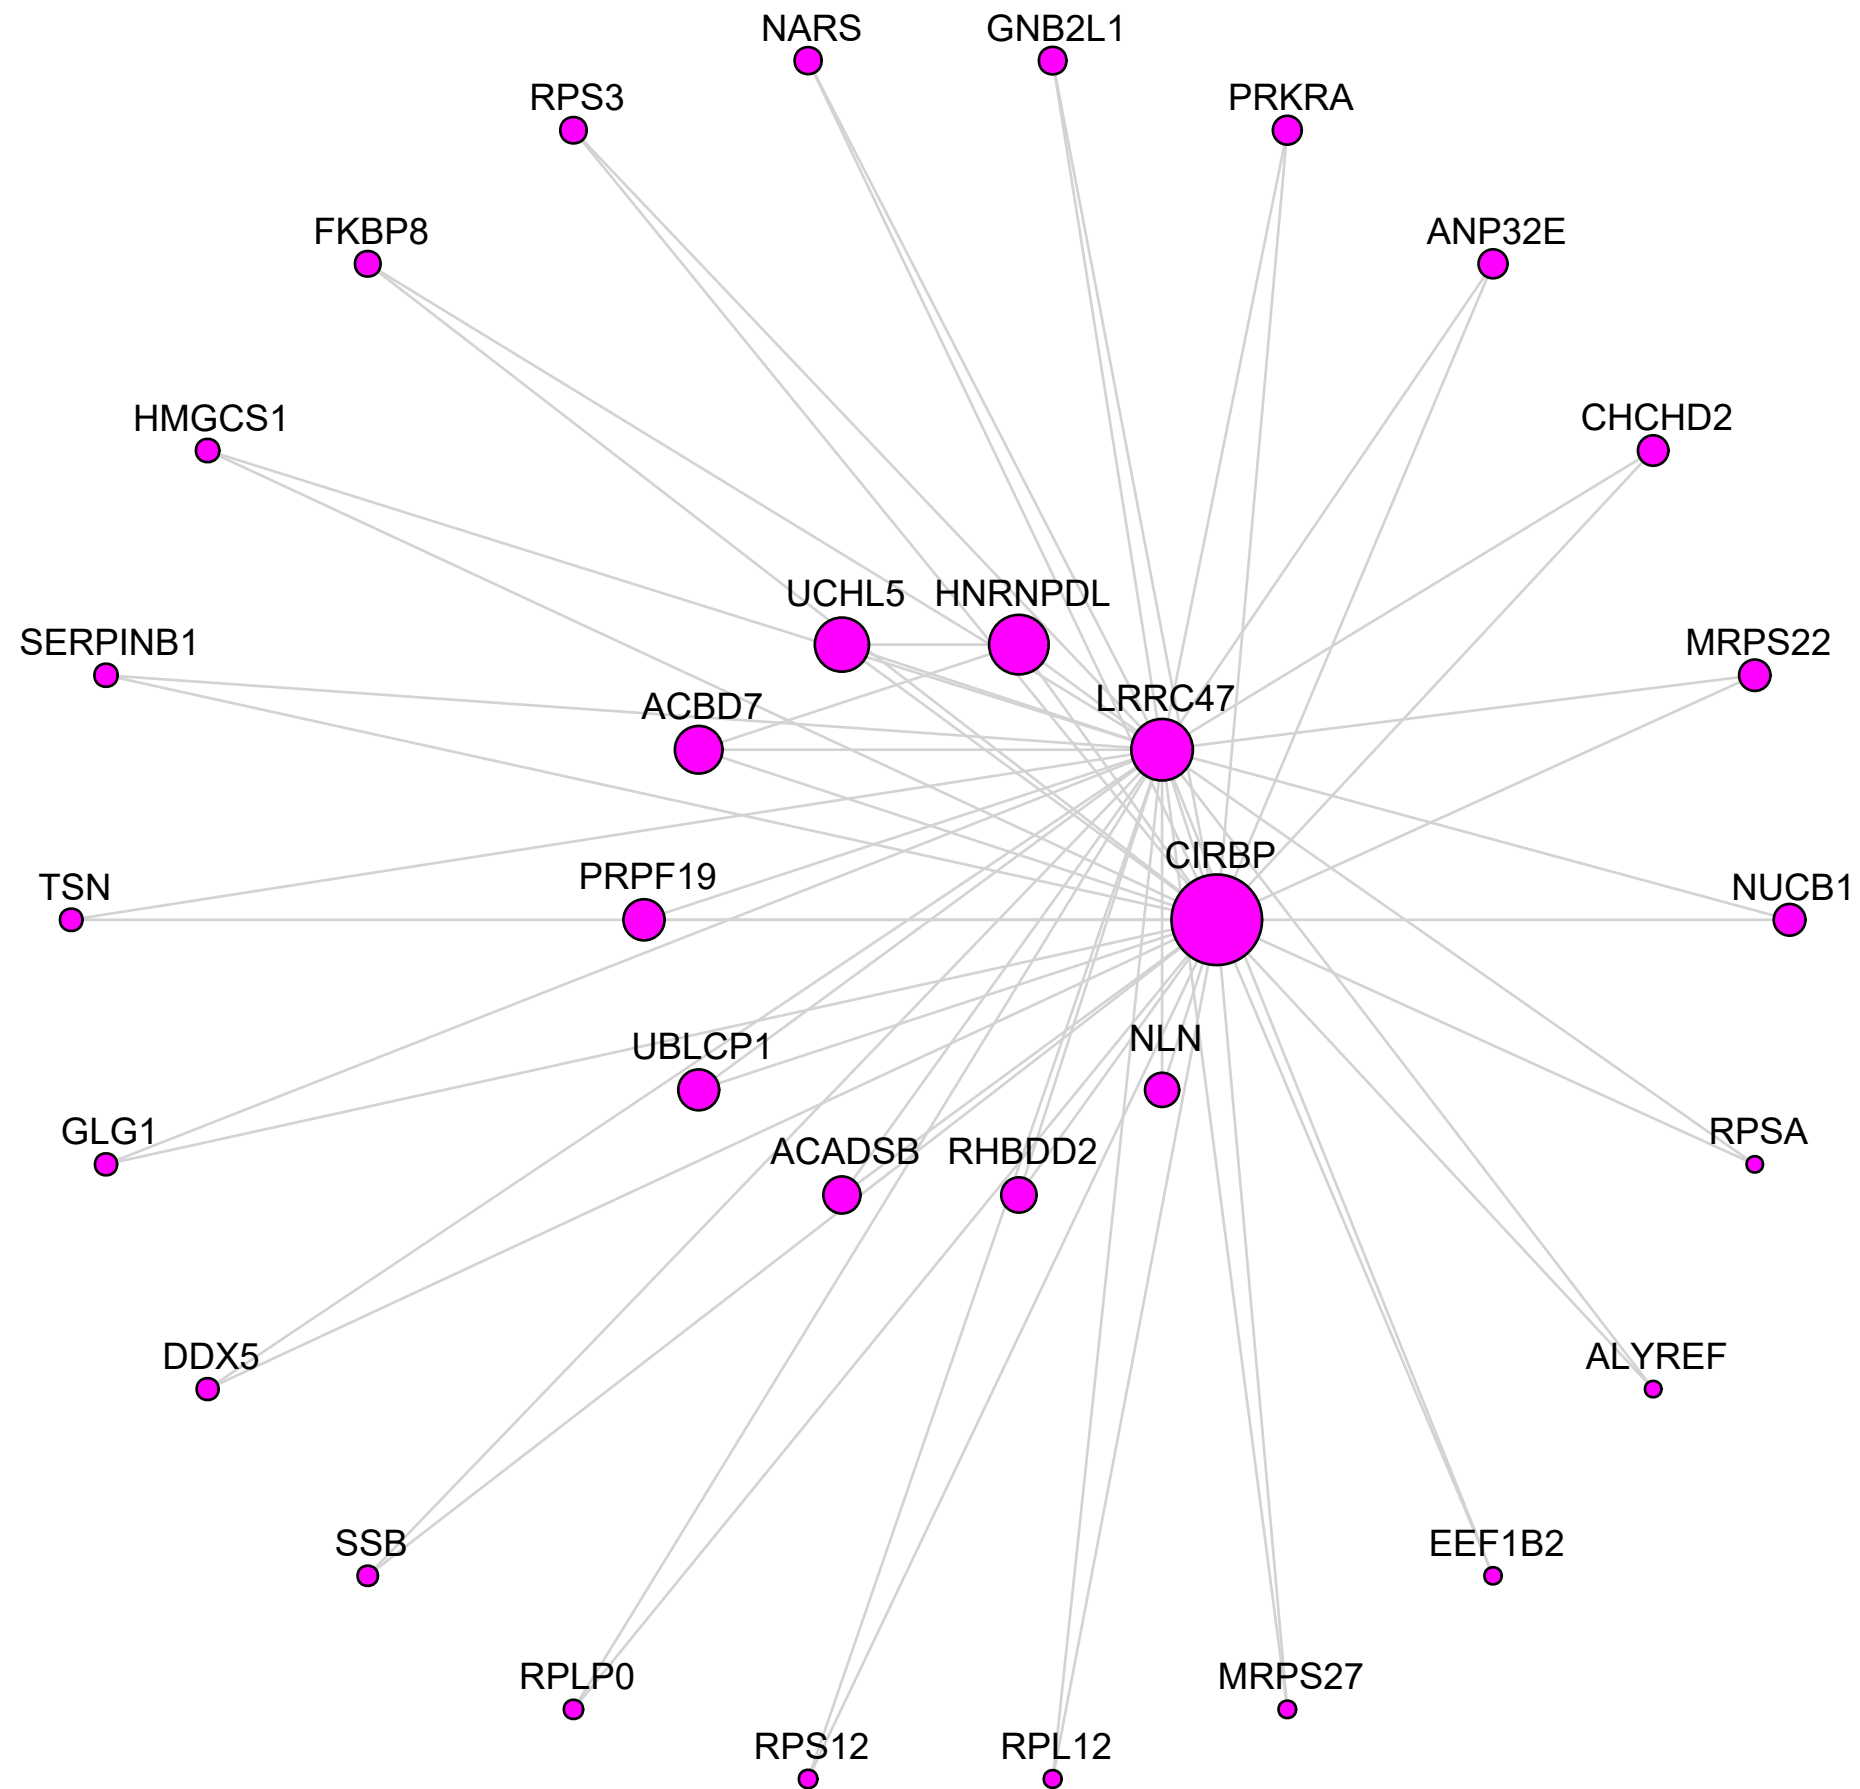

**Supplementary Figure 2. AD Network Module Protein Memberships.** The top 100 proteins by module eigenprotein correlation value (kME) in each AD protein network module. The size of each circle indicates the relative kME. Those proteins with the largest kME are considered “hub” proteins within the module, and explain the largest variance in module expression.

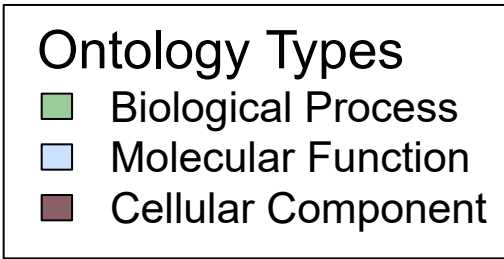

M1 turquoise

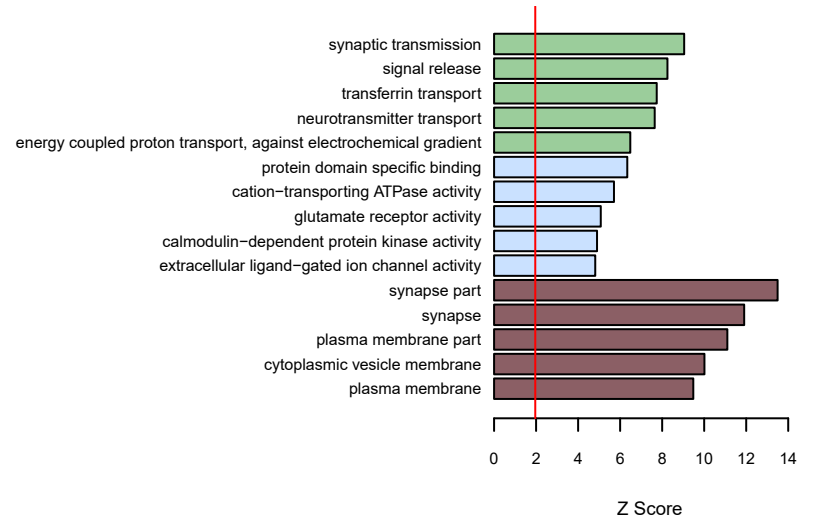

M2 blue

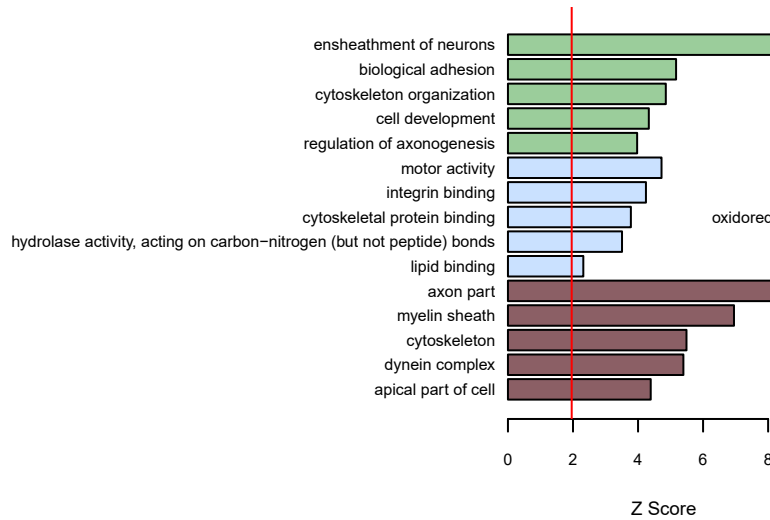

M3 brown

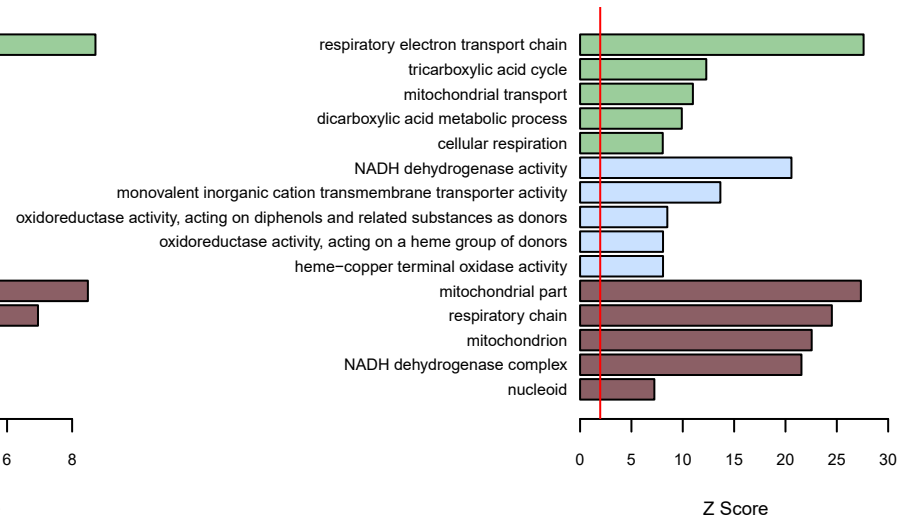

M4 yellow

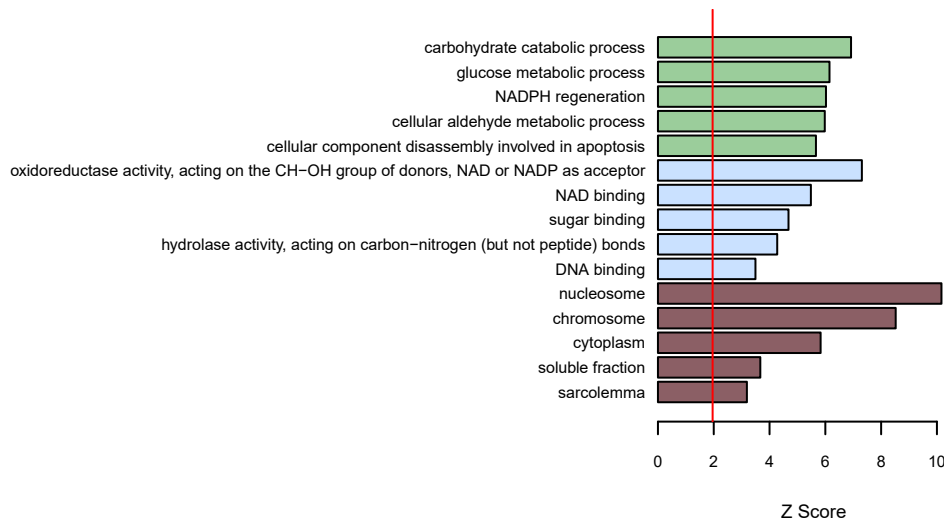

M5 green

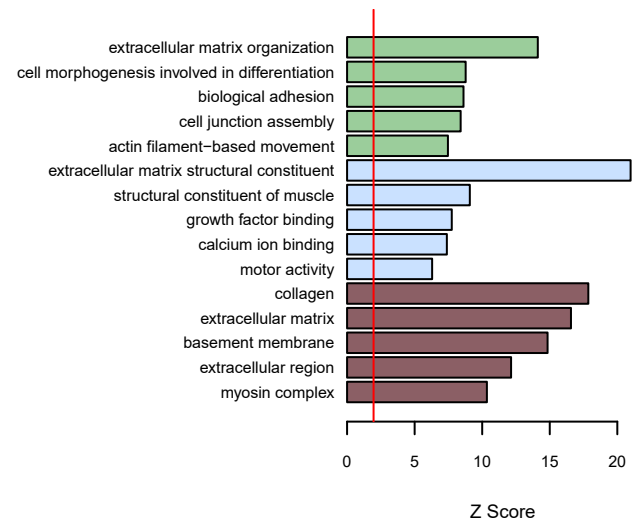

**M6 red**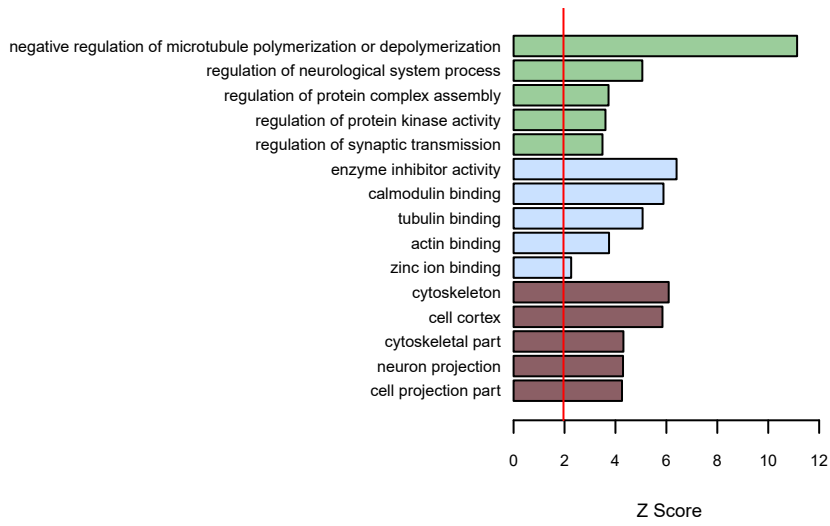**M7 black**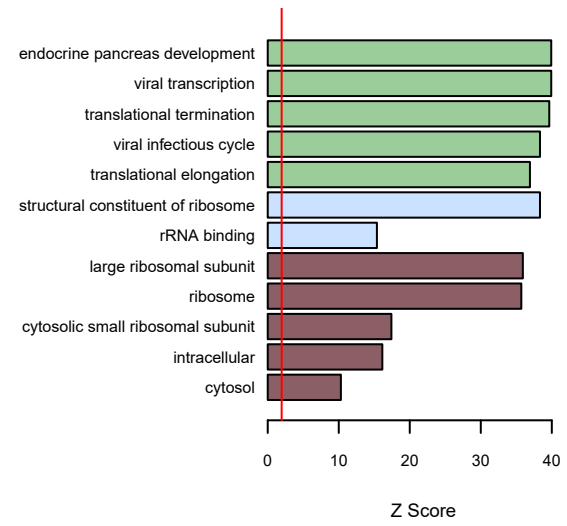**M8 pink**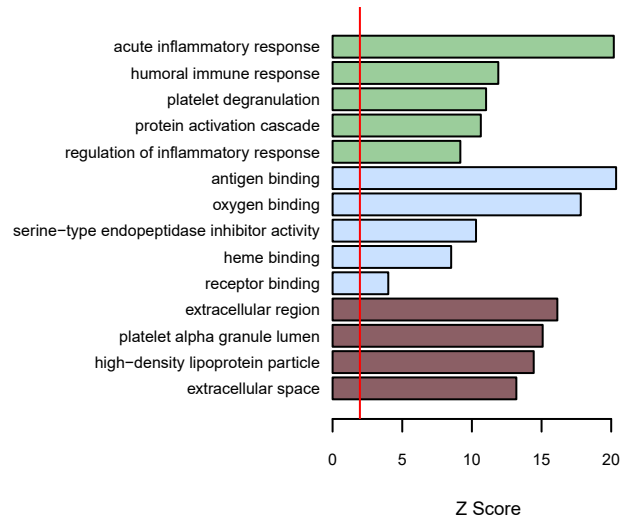**M9 magenta**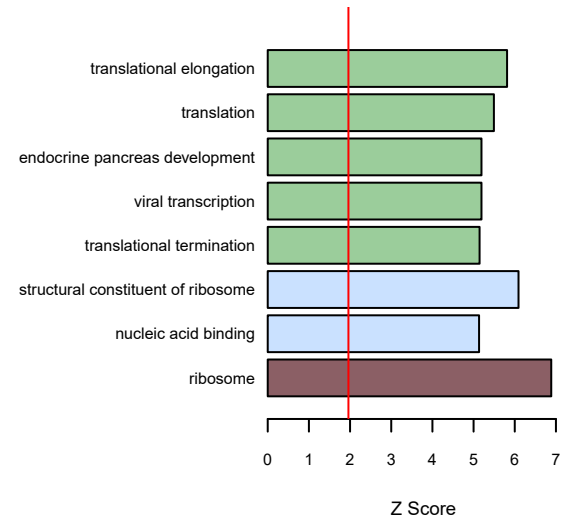**M10 purple**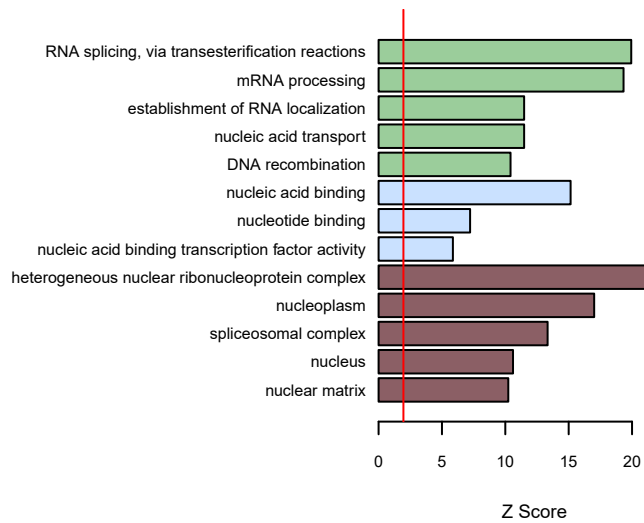**M11 greenyellow**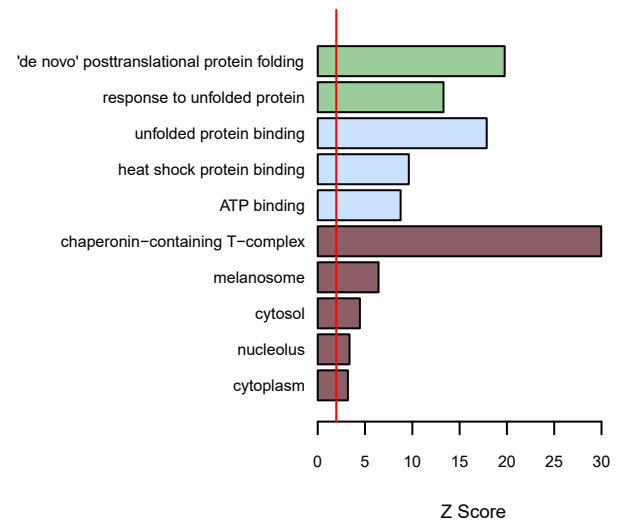



**M12 tan**

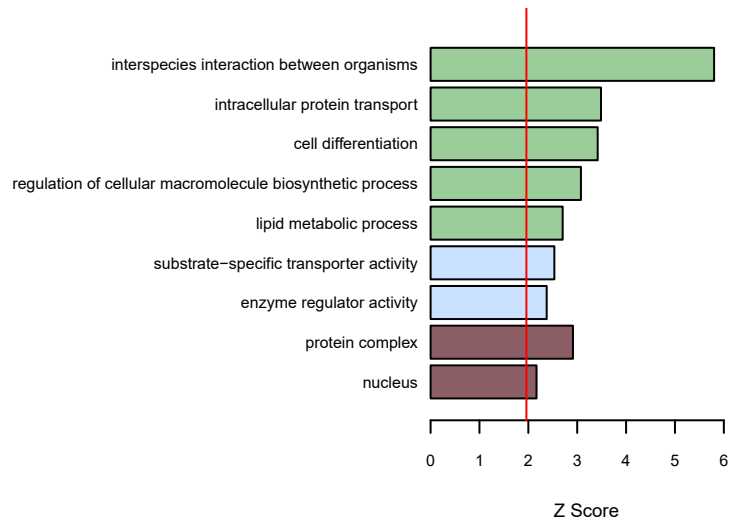

**M13 salmon**

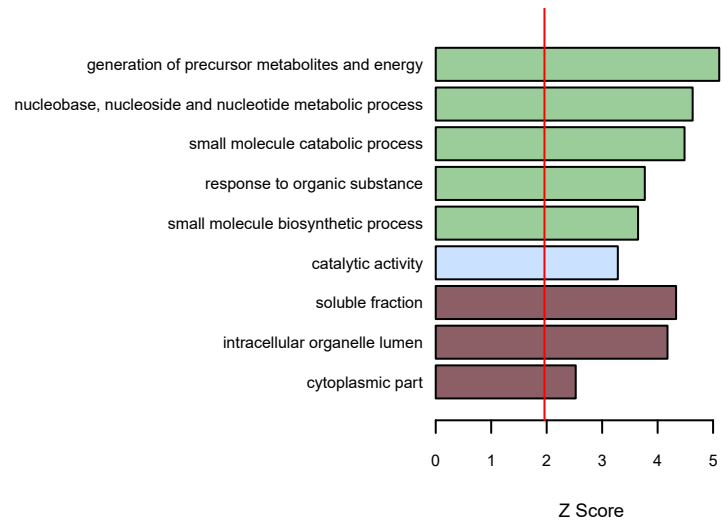

**Supplementary Figure 3. GO Analysis on AD Network Modules.** Gene ontology (GO) analysis was performed to gain insight into the biological meaning of each AD protein network module. Enrichment for a given ontology is shown by z score.

**M5 green.Consensus**

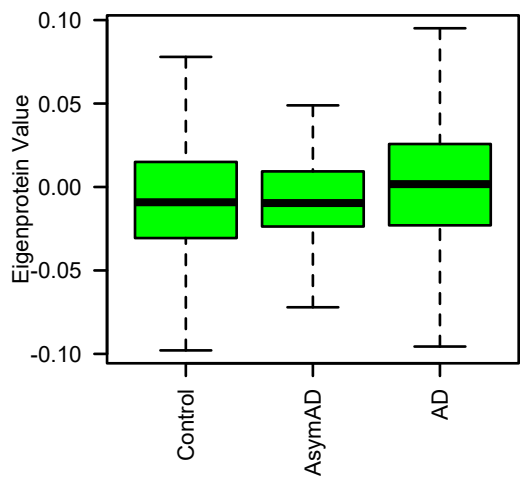

**M5 green.ROSMAP TMT (Synthetic)**  
K-W ANOVA p: 0.74

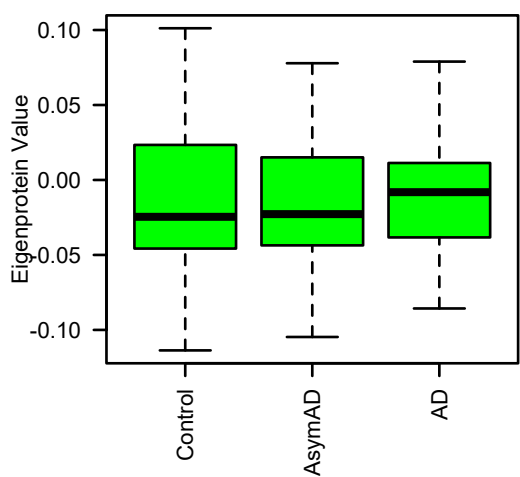

**M5 green**  
ND K-W p = 0.023 | AD K-W p = 0.94

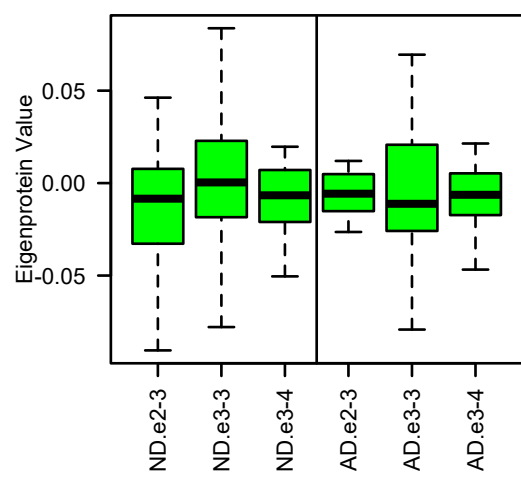

bicor=-0.078, p=0.16  
cor=0.075, p=0.18

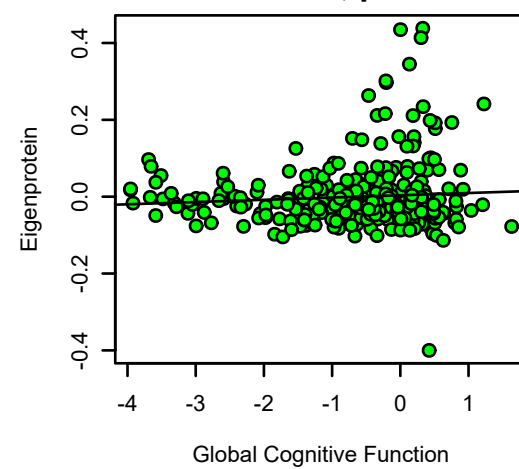

bicor=-0.074, p=0.18  
cor=0.051, p=0.36

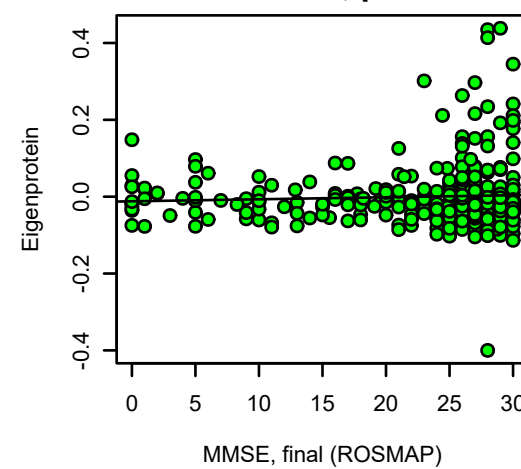

bicor=0.071, p=0.21  
cor=-0.046, p=0.41

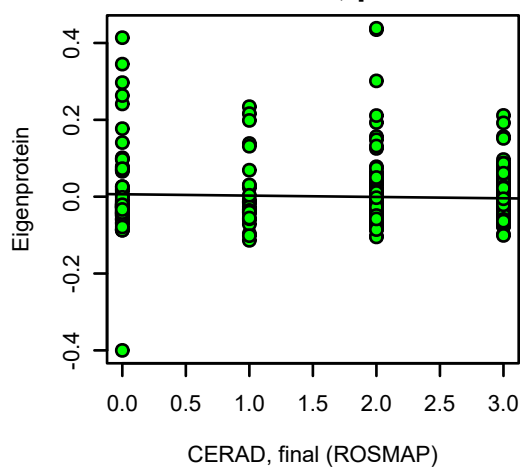

bicor=-0.011, p=0.84  
cor=-0.097, p=0.082

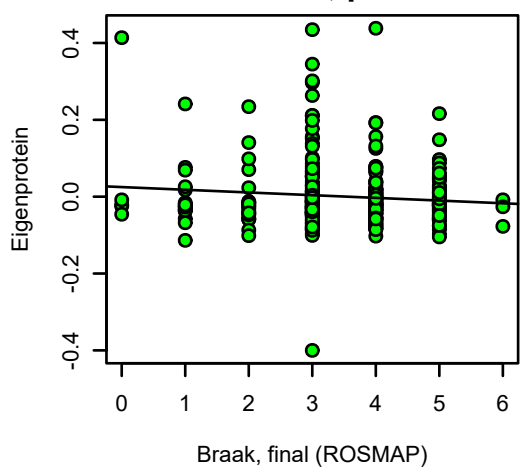

bicor=-0.0011, p=0.98  
cor=-0.05, p=0.37

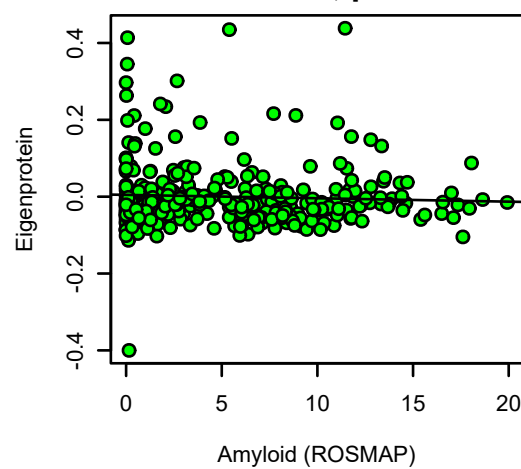

bicor=0.047, p=0.4  
cor=-0.056, p=0.32

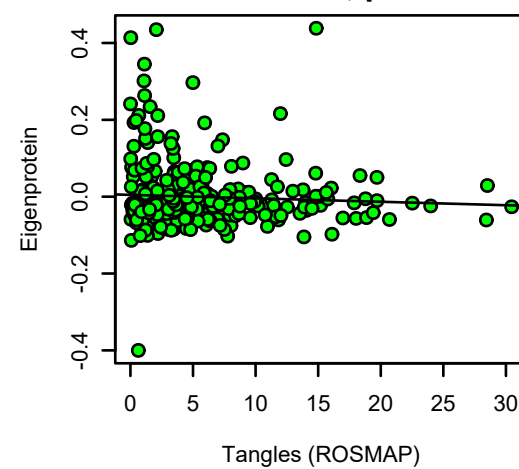

bicor=0.036, p=0.51  
cor=-0.04, p=0.47

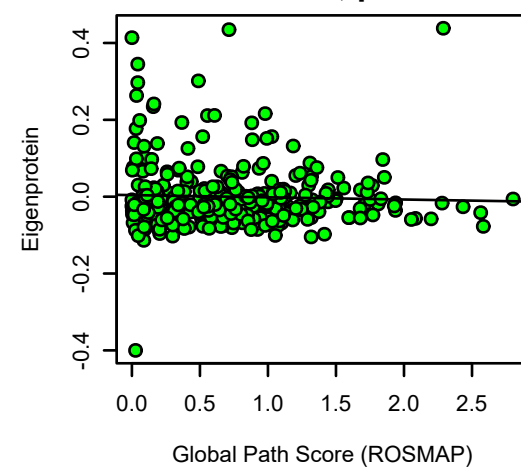

**M8 pink.Consensus**

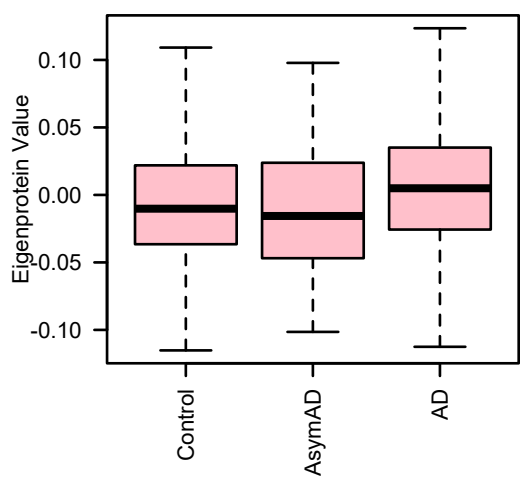

**M8 pink.ROSMAP TMT (Synthetic)**  
K-W ANOVA p: 0.96

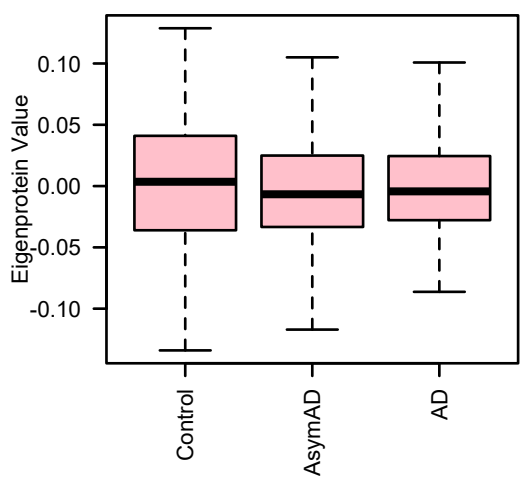

**M8 pink**  
ND K-W p = 0.0024 | AD K-W p = 0.18

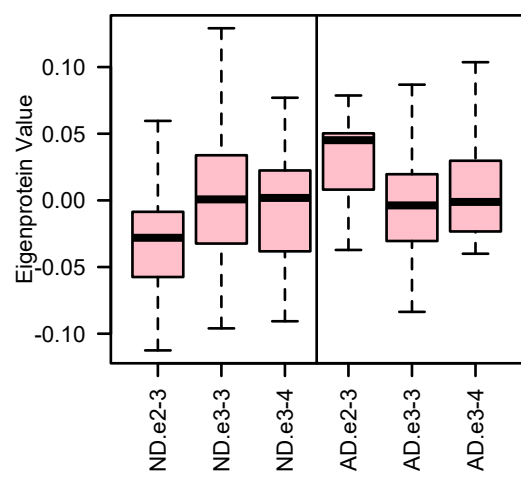

bicor=0.0079, p=0.89  
cor=-0.028, p=0.62

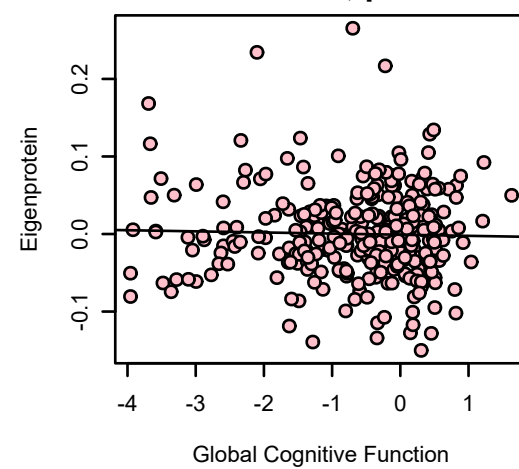

bicor=0.037, p=0.51  
cor=-0.05, p=0.37

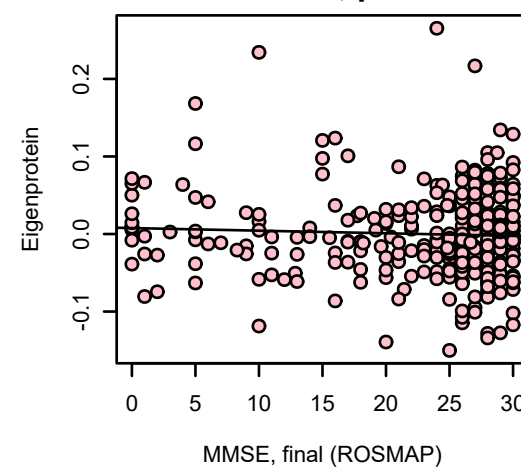

bicor=-0.011, p=0.84  
cor=0.014, p=0.8

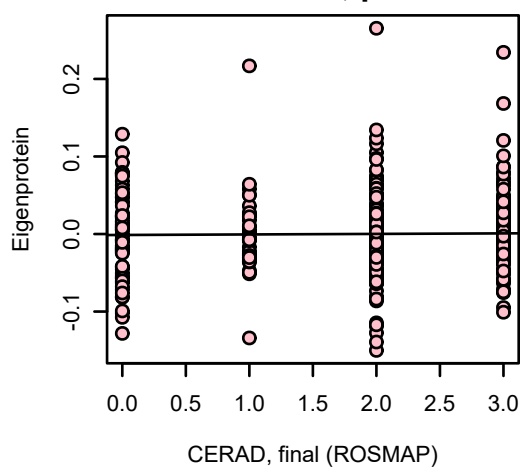

bicor=-0.04, p=0.47  
cor=-0.0034, p=0.95

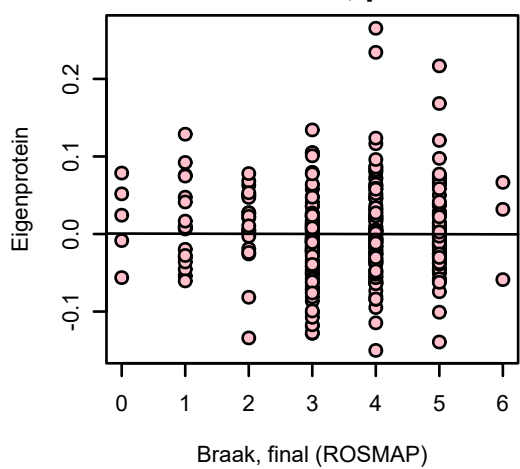

bicor=0.043, p=0.45  
cor=0.048, p=0.39

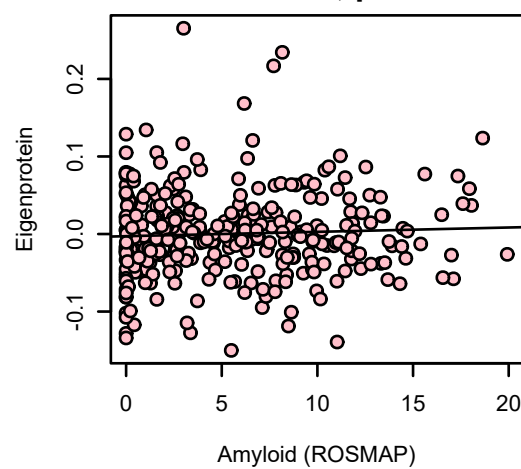

bicor=0.0035, p=0.95  
cor=0.076, p=0.17

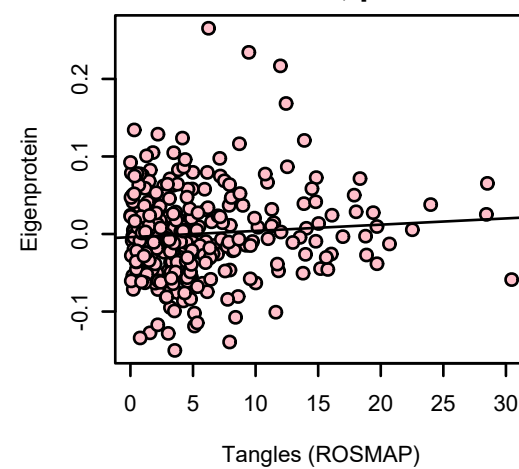

bicor=0.026, p=0.64  
cor=0.054, p=0.33

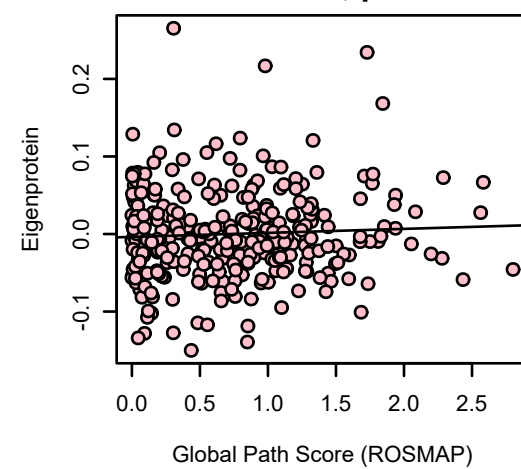

**M10 purple.Consensus**

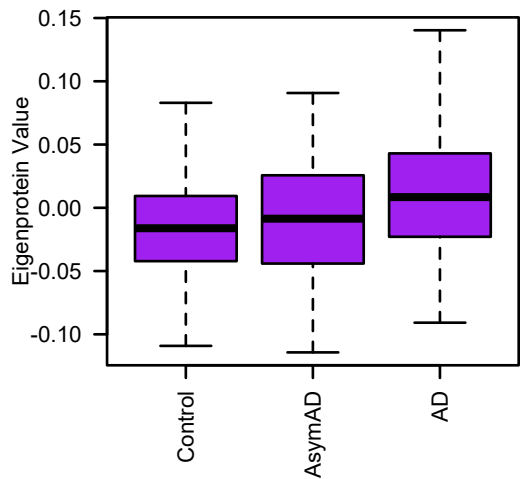

**M10 purple.ROSMAP TMT (Synthetic)**  
K-W ANOVA p: 0.51

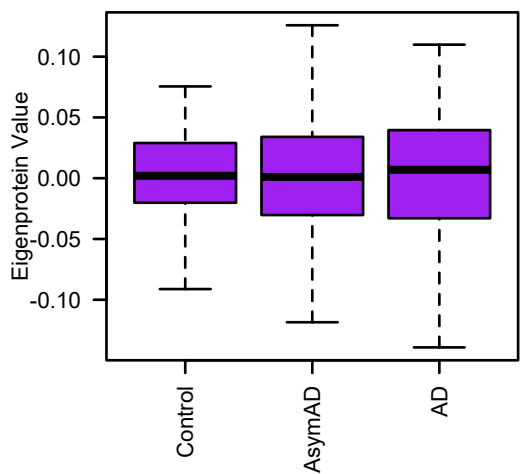

**M10 purple**  
ND K-W p = 0.95 | AD K-W p = 0.37

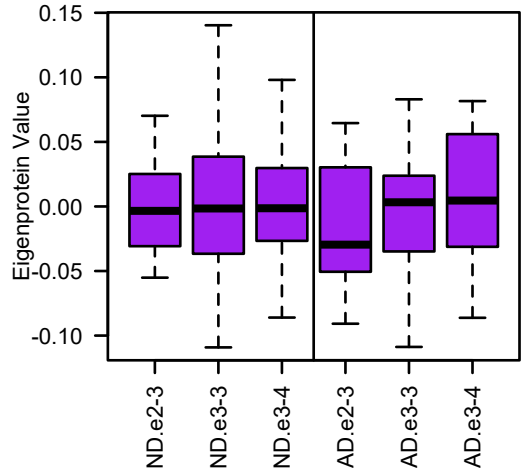

**bicor=-0.11, p=0.046**  
**cor=-0.14, p=0.012**

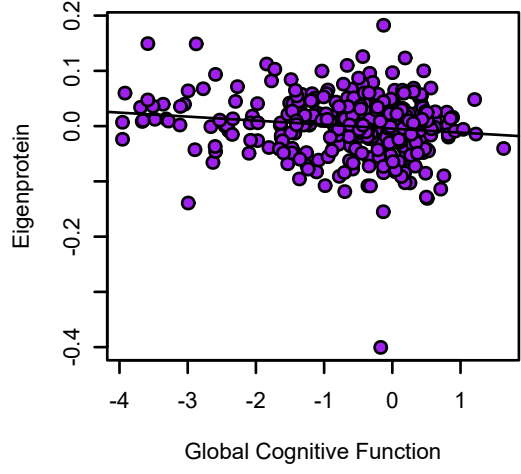

**bicor=-0.037, p=0.51**  
**cor=-0.1, p=0.073**

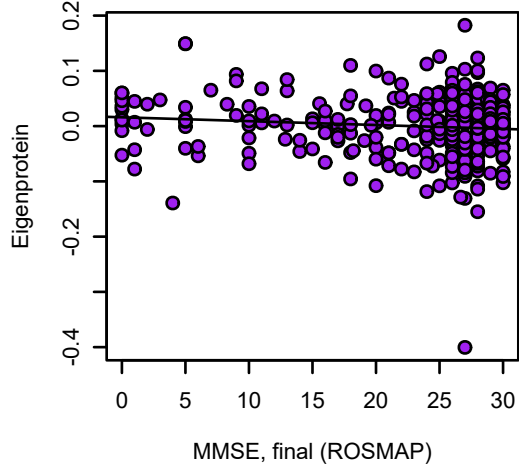

**bicor=0.056, p=0.32**  
**cor=0.048, p=0.39**

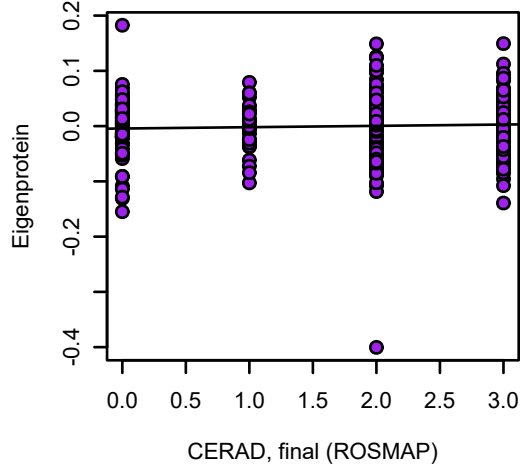

**bicor=0.092, p=0.098**  
**cor=0.057, p=0.31**

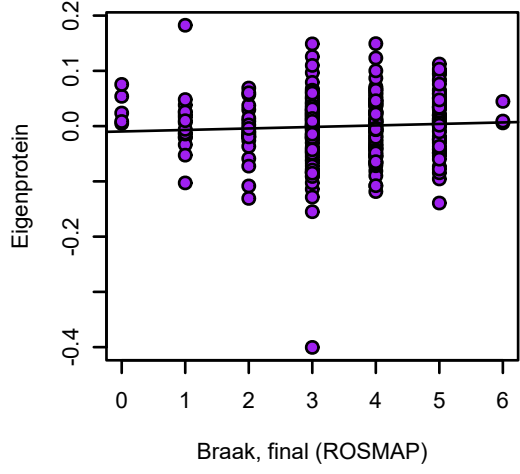

**bicor=0.11, p=0.047**  
**cor=0.14, p=0.012**

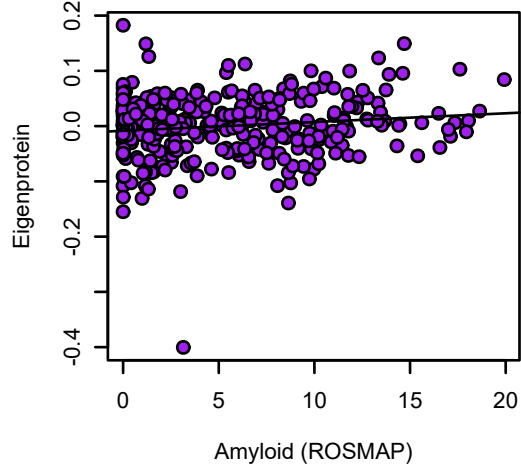

**bicor=0.093, p=0.096**  
**cor=0.099, p=0.076**

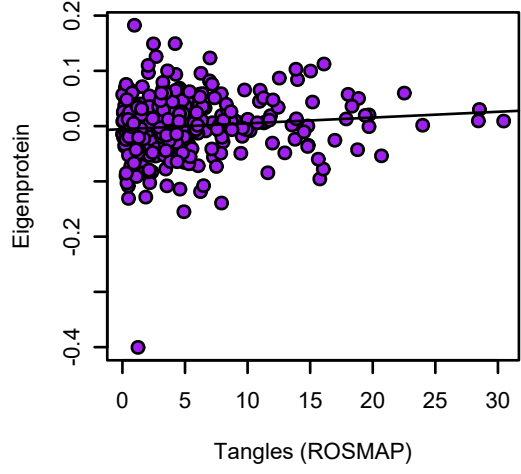

**bicor=0.063, p=0.26**  
**cor=0.071, p=0.2**

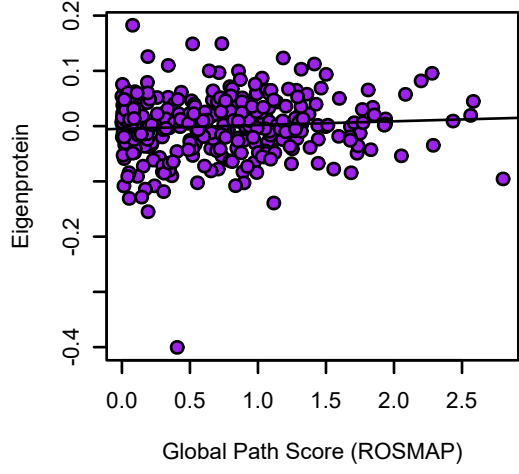

**M2 blue.Consensus**

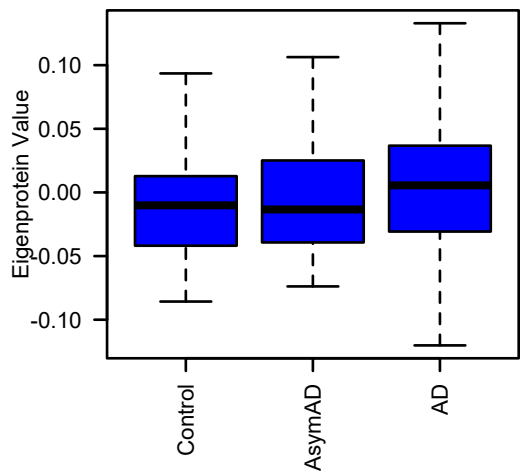

**M2 blue.ROSMAP TMT (Synthetic)**  
K-W ANOVA p: 0.26

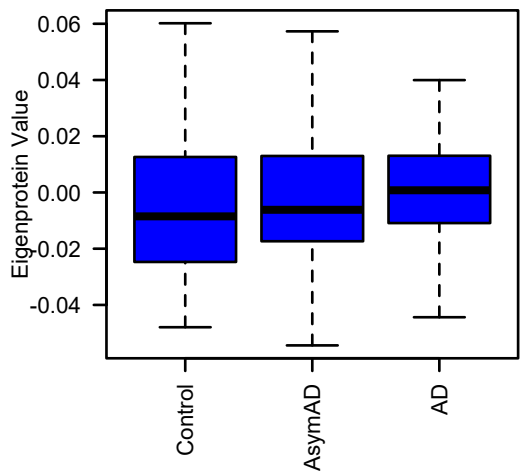

**M2 blue**  
ND K-W p = 0.64 | AD K-W p = 0.17

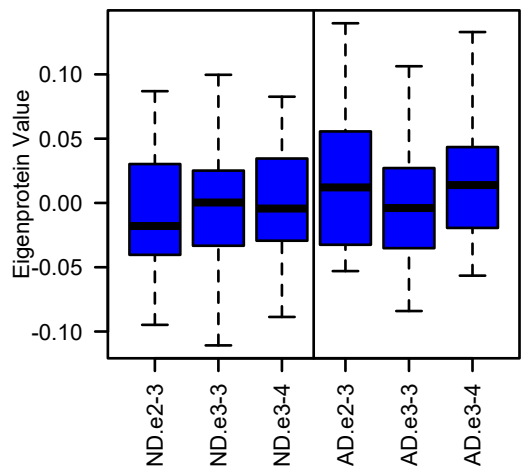

**bicor=-0.13, p=0.016**  
**cor=-0.1, p=0.073**

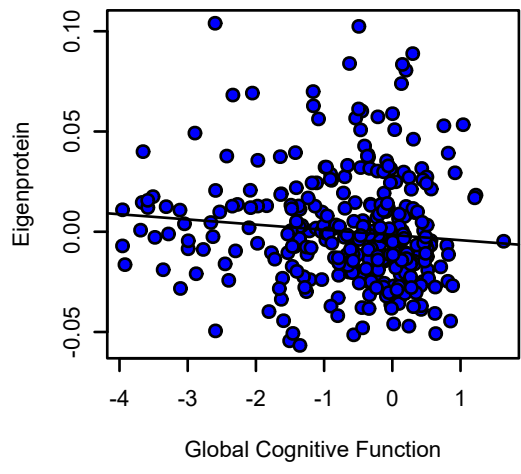

**bicor=-0.085, p=0.13**  
**cor=-0.087, p=0.12**

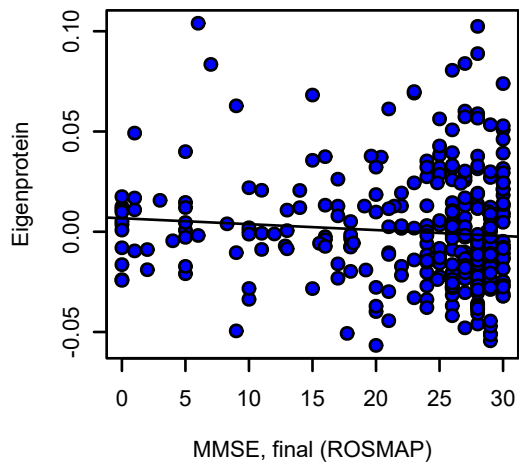

**bicor=0.092, p=0.097**  
**cor=0.1, p=0.073**

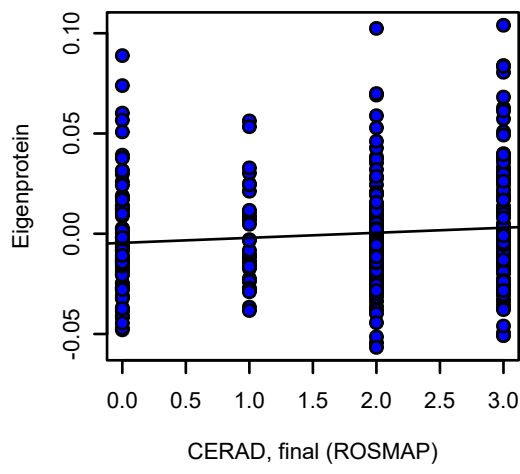

**bicor=0.018, p=0.74**  
**cor=0.049, p=0.38**

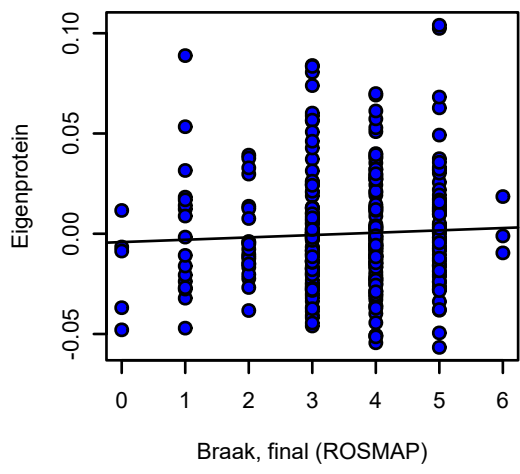

**bicor=-0.031, p=0.58**  
**cor=-0.066, p=0.24**

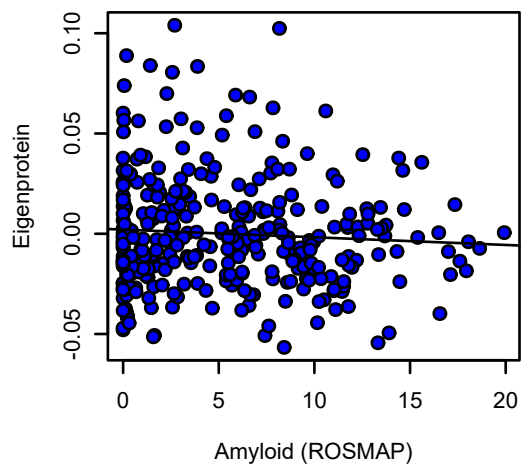

**bicor=0.049, p=0.38**  
**cor=0.12, p=0.031**

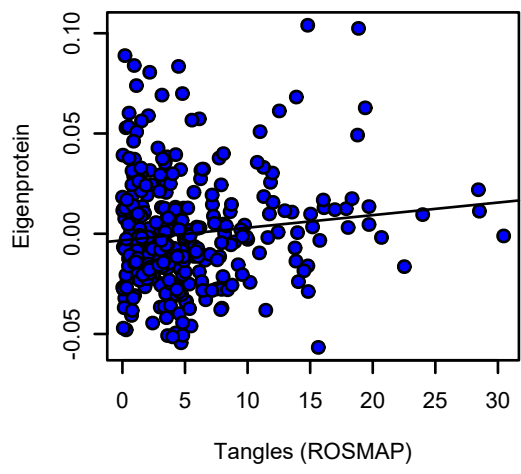

**bicor=0.091, p=0.1**  
**cor=0.091, p=0.1**

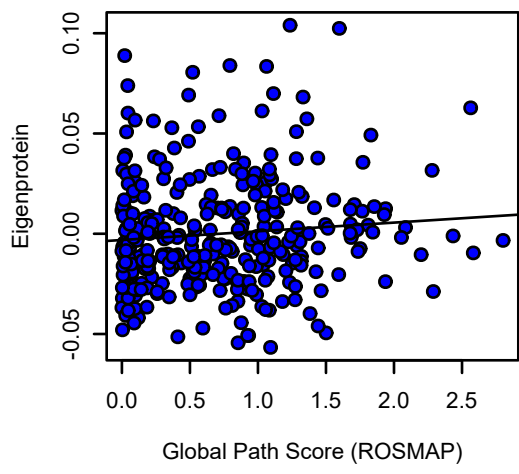

**M4 yellow.Consensus**

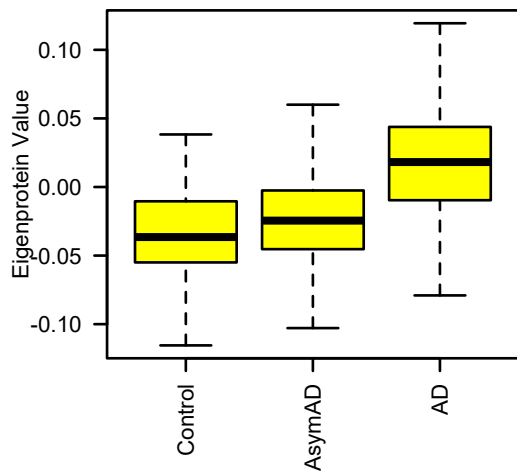

**M4 yellow.ROSMAP TMT (Synthetic)**  
K-W ANOVA p: 7.7e-11

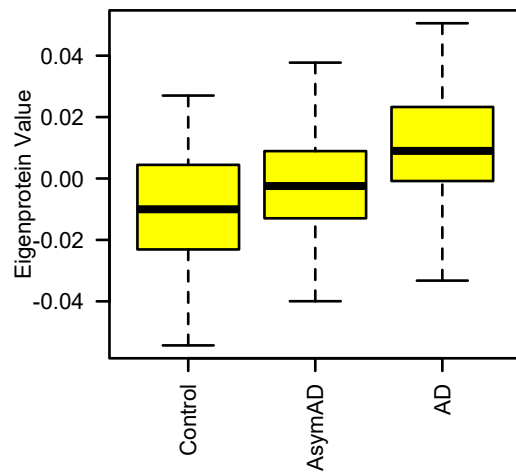

**M4 yellow**  
ND K-W p = 0.09 | AD K-W p = 0.21

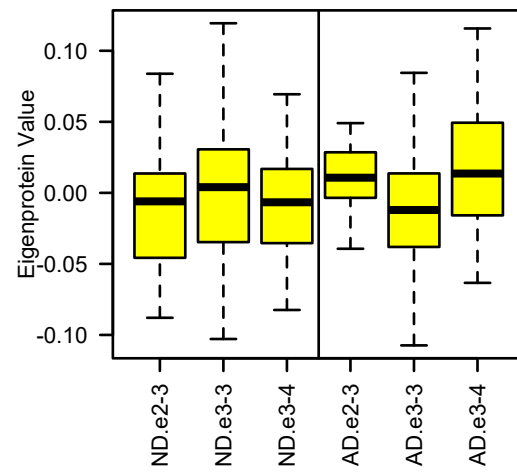

**bicor=-0.36, p=3.2e-11**  
**cor=-0.36, p=2.6e-11**

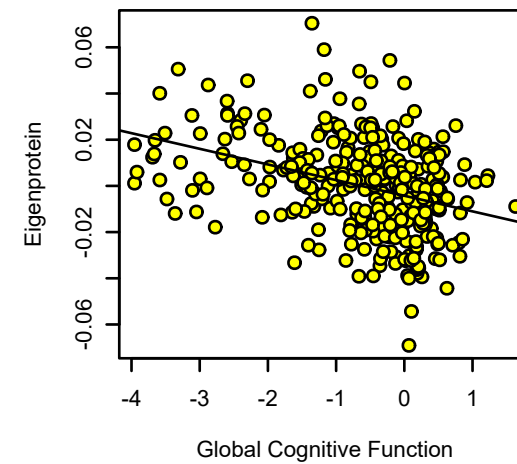

**bicor=-0.26, p=3.2e-06**  
**cor=-0.39, p=3.5e-13**

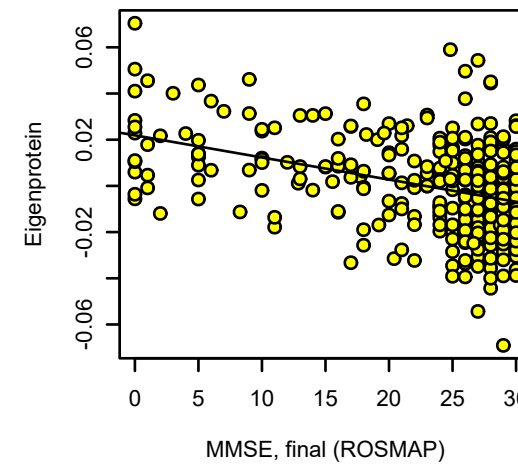

**bicor=0.38, p=9.2e-13**  
**cor=0.38, p=1.6e-12**

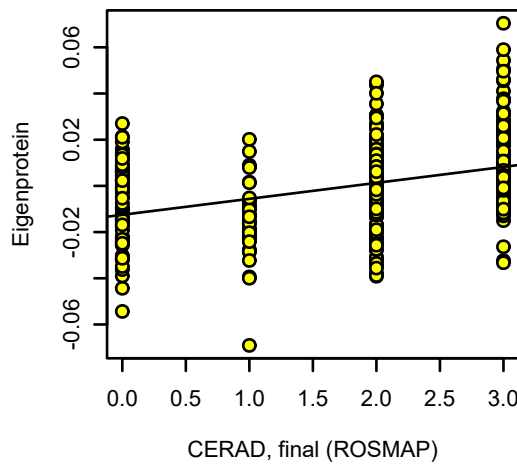

**bicor=0.31, p=1.8e-08**  
**cor=0.29, p=1.1e-07**

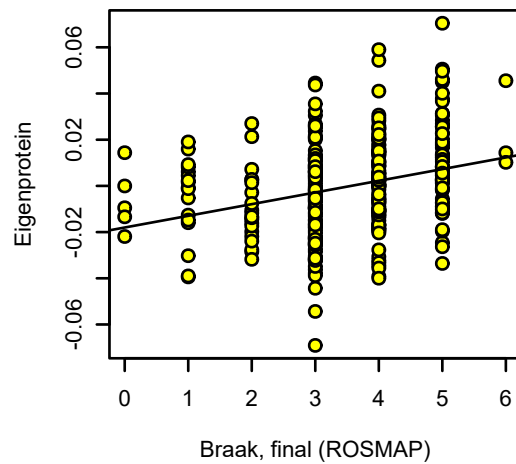

**bicor=0.26, p=3.5e-06**  
**cor=0.25, p=5.6e-06**

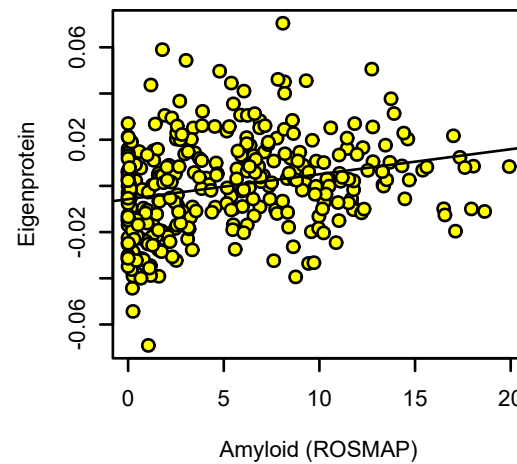

**bicor=0.3, p=4.2e-08**  
**cor=0.37, p=7e-12**

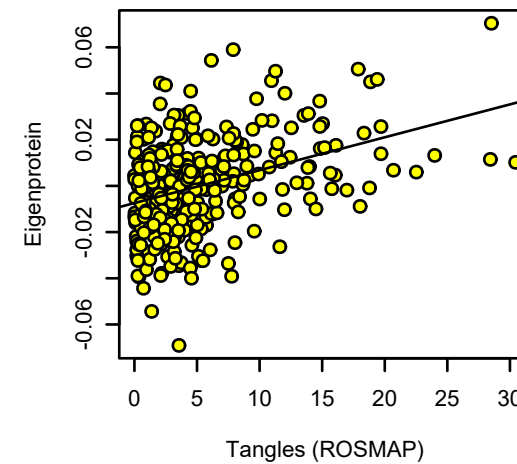

**bicor=0.38, p=8.3e-13**  
**cor=0.39, p=3.5e-13**

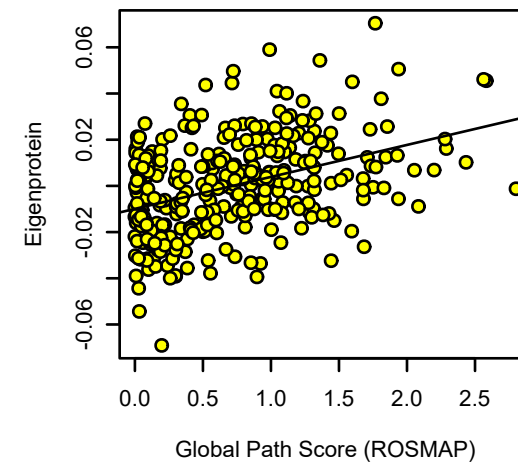

**M11 greenyellow.Consensus**

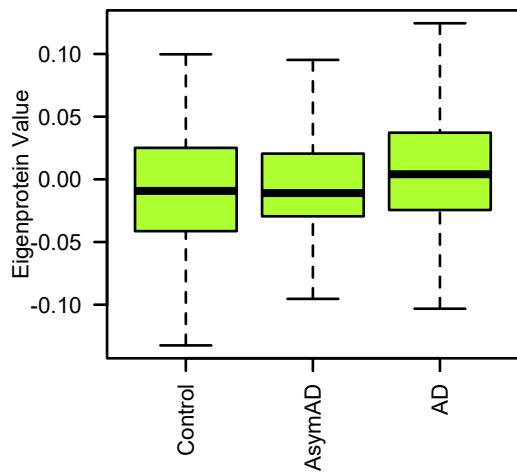

**M11 greenyellow.ROSMAP TMT (Synthetic)**  
K-W ANOVA p: 0.89

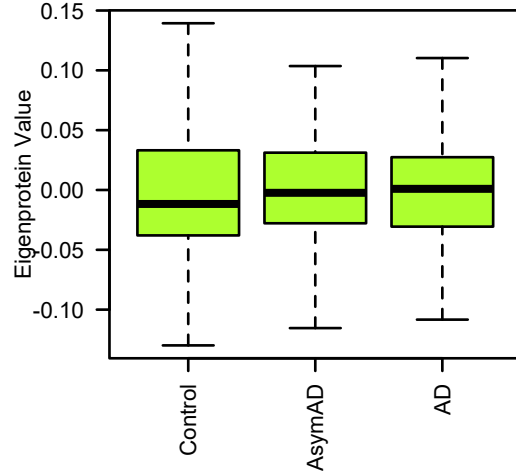

**M11 greenyellow**  
ND K-W p = 0.68 | AD K-W p = 0.61

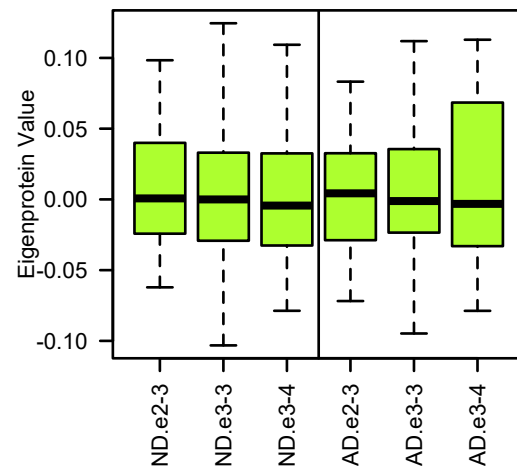

**bicor=-0.036, p=0.52**  
**cor=-0.023, p=0.68**

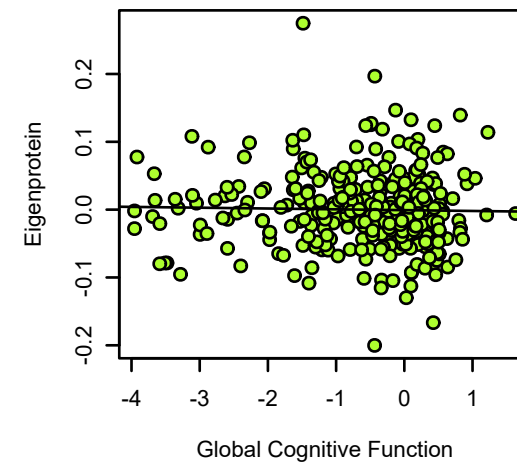

**bicor=0.011, p=0.84**  
**cor=0.025, p=0.65**

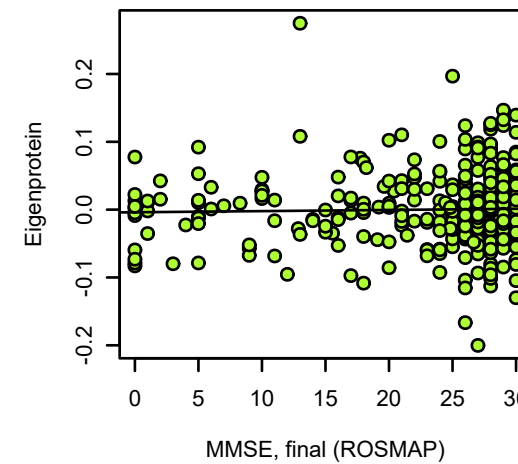

**bicor=0.031, p=0.58**  
**cor=0.033, p=0.55**

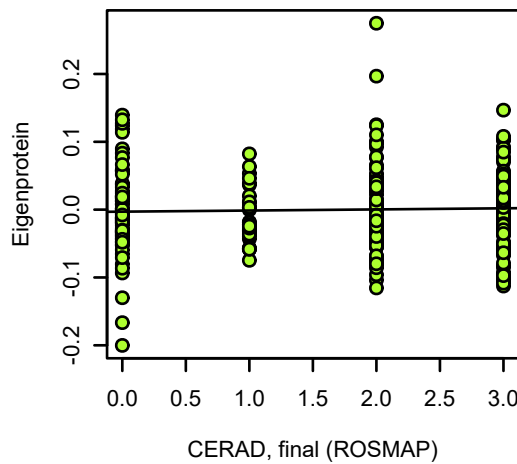

**bicor=-0.047, p=0.4**  
**cor=0.0039, p=0.94**

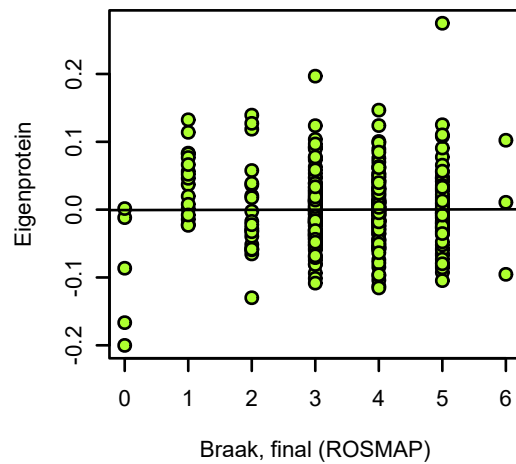

**bicor=0.027, p=0.63**  
**cor=0.061, p=0.28**

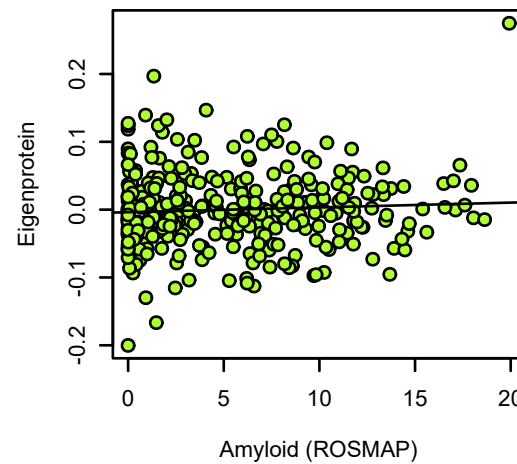

**bicor=0.0072, p=0.9**  
**cor=0.013, p=0.82**

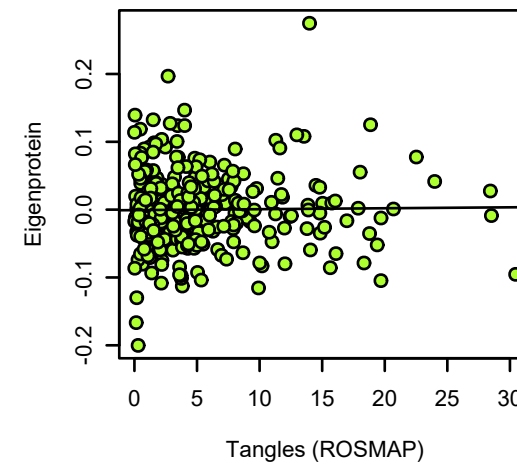

**bicor=0.048, p=0.39**  
**cor=0.029, p=0.6**

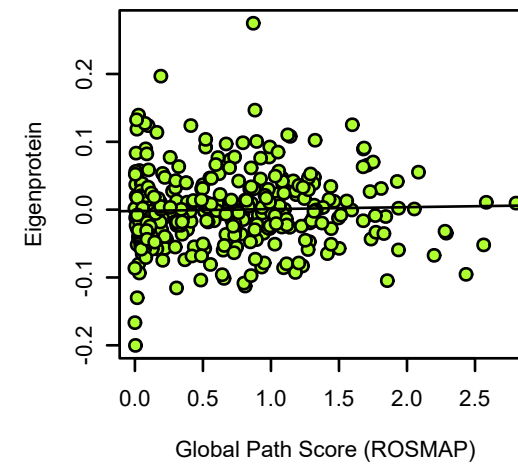

**M3 brown.Consensus**

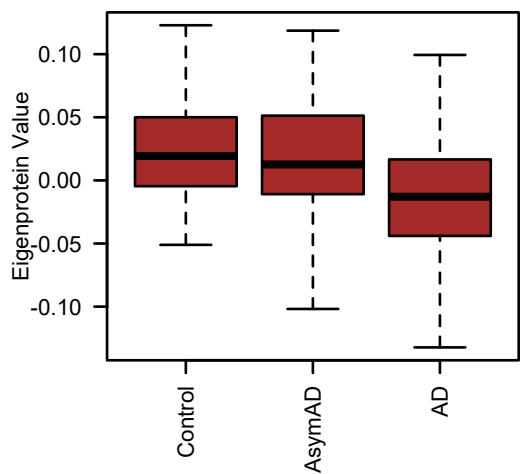

**M3 brown.ROSMAP TMT (Synthetic)**  
K-W ANOVA p: 2e-06

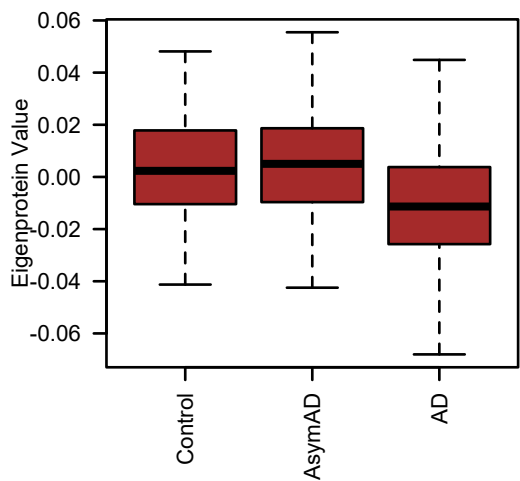

**M3 brown**  
ND K-W p = 0.32 | AD K-W p = 0.27

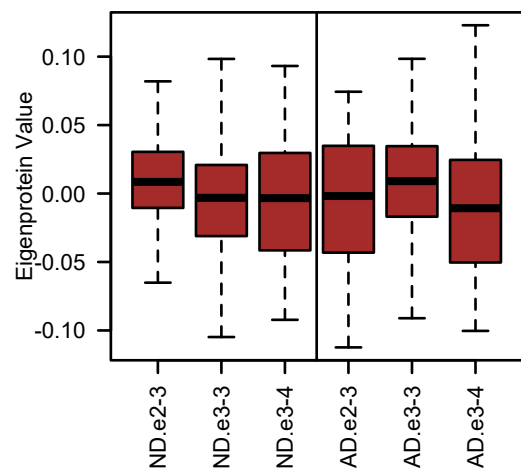

**bicor=0.32, p=4.9e-09**  
**cor=0.31, p=1.3e-08**

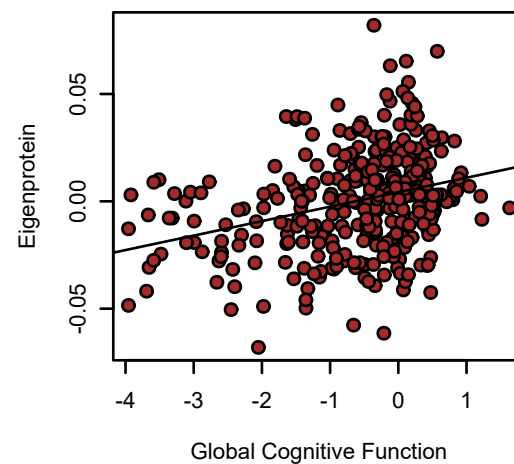

**bicor=0.23, p=3.1e-05**  
**cor=0.29, p=1.1e-07**

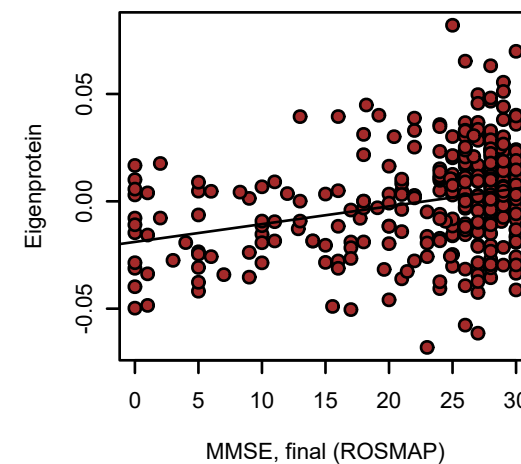

**bicor=-0.14, p=0.012**  
**cor=-0.14, p=0.012**

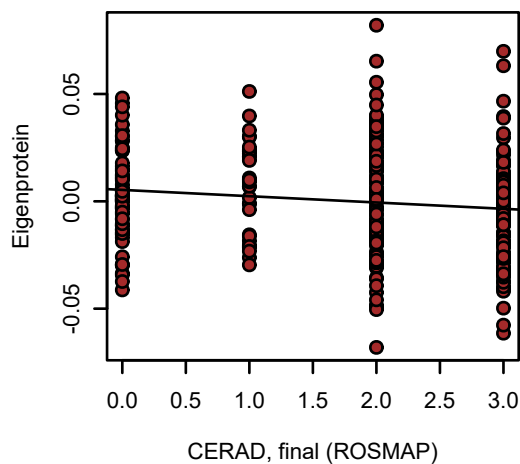

**bicor=-0.14, p=0.013**  
**cor=-0.15, p=0.0069**

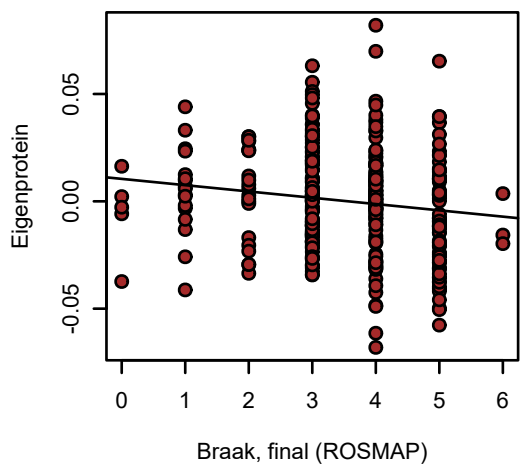

**bicor=-0.088, p=0.11**  
**cor=-0.066, p=0.24**

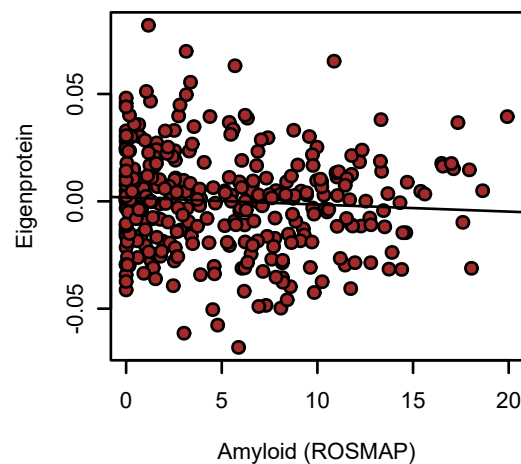

**bicor=-0.24, p=9.6e-06**  
**cor=-0.25, p=5.6e-06**

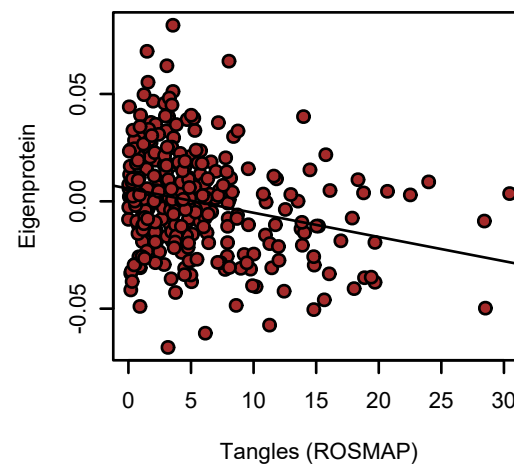

**bicor=-0.2, p=0.00033**  
**cor=-0.19, p=6e-04**

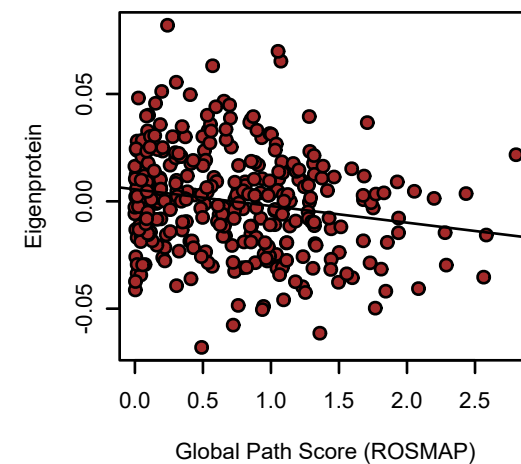

**M6 red.Consensus**

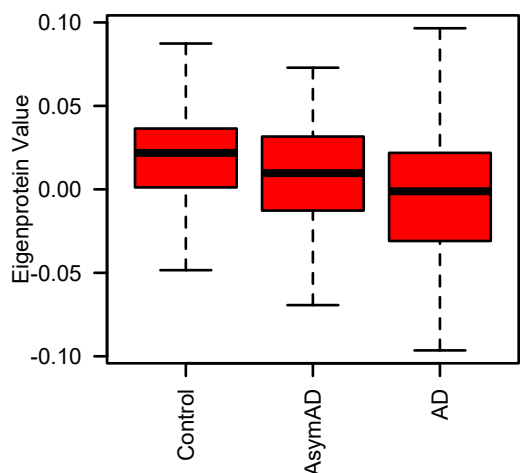

**M6 red.ROSMAP TMT (Synthetic)**  
K-W ANOVA p: 0.19

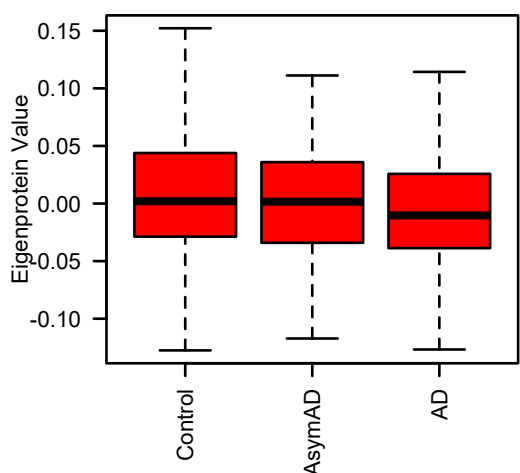

**M6 red**  
ND K-W p = 0.51 | AD K-W p = 0.56

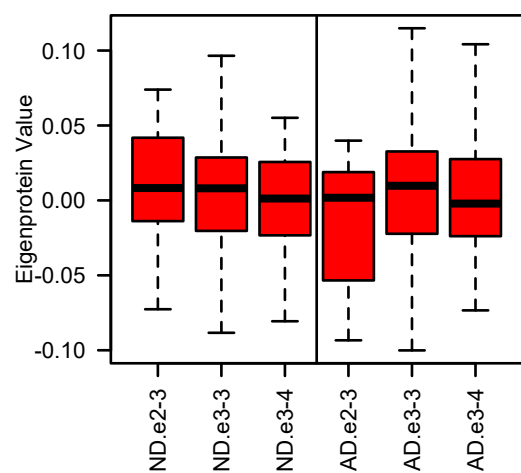

**bicor=0.068, p=0.23**  
**cor=0.086, p=0.12**

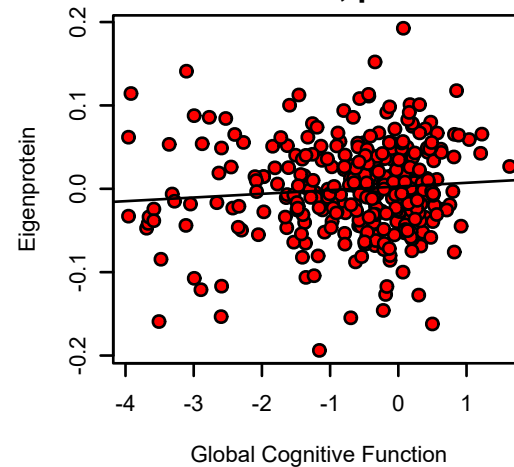

**bicor=0.055, p=0.32**  
**cor=0.12, p=0.031**

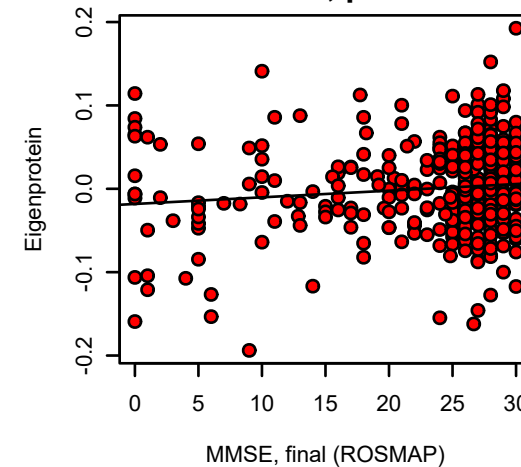

**bicor=-0.14, p=0.013**  
**cor=-0.13, p=0.019**

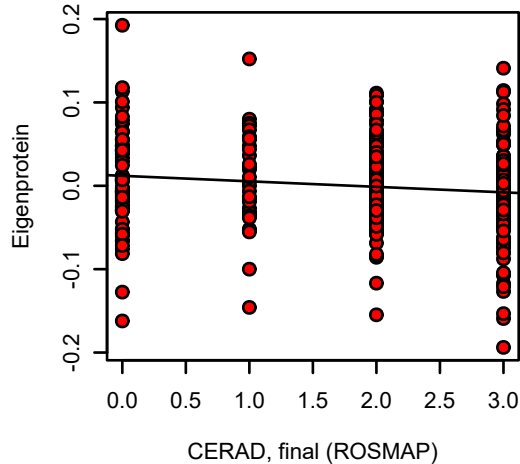

**bicor=-0.16, p=0.0034**  
**cor=-0.17, p=0.0022**

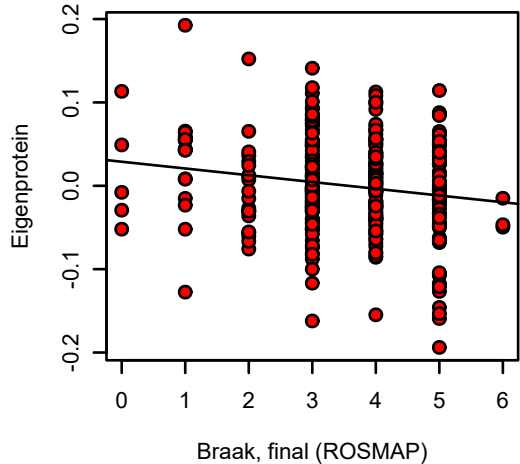

**bicor=-0.042, p=0.46**  
**cor=-0.058, p=0.3**

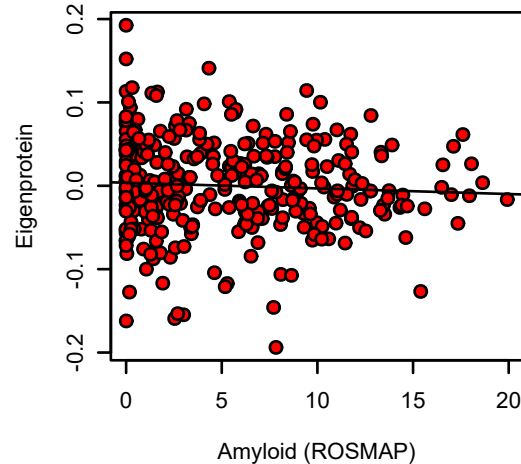

**bicor=-0.13, p=0.022**  
**cor=-0.21, p=0.00015**

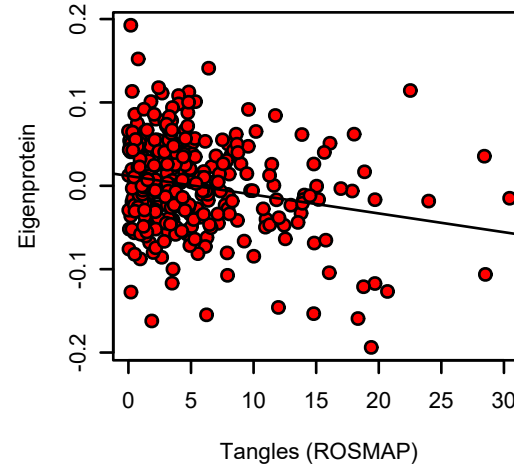

**bicor=-0.17, p=0.0017**  
**cor=-0.21, p=0.00014**

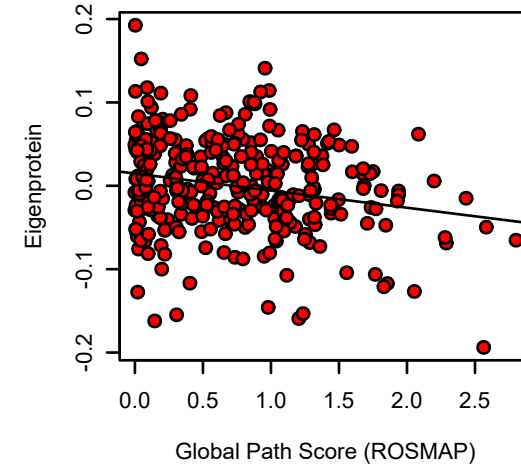

**M1 turquoise.Consensus**

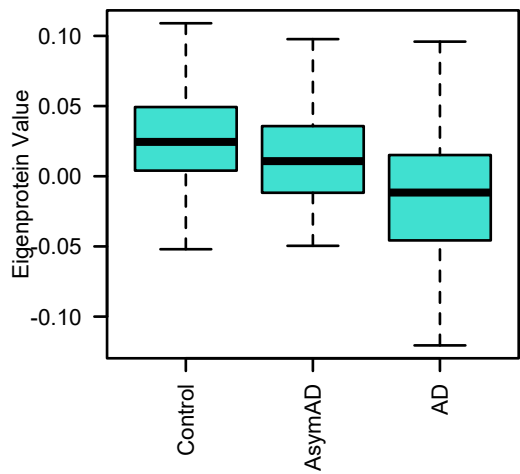

**M1 turquoise.ROSMAP TMT (Synthetic)**  
K-W ANOVA p: 0.0044

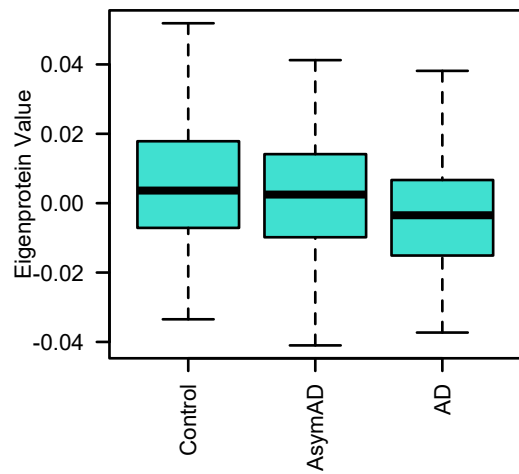

**M1 turquoise**  
ND K-W p = 0.22 | AD K-W p = 0.23

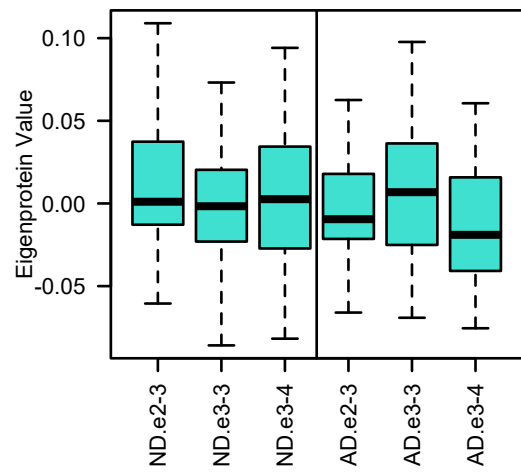

**bicor=0.15, p=0.0062**  
**cor=0.16, p=0.0039**

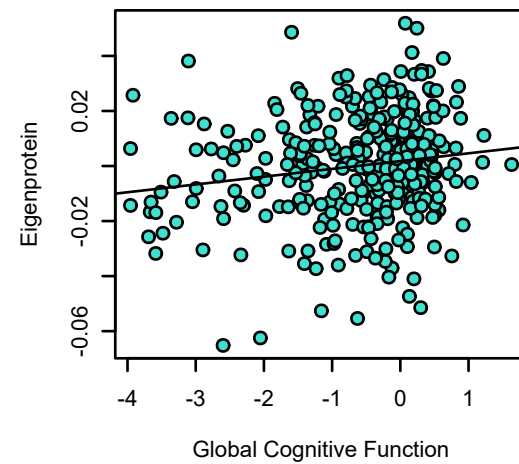

**bicor=0.13, p=0.018**  
**cor=0.18, p=0.0012**

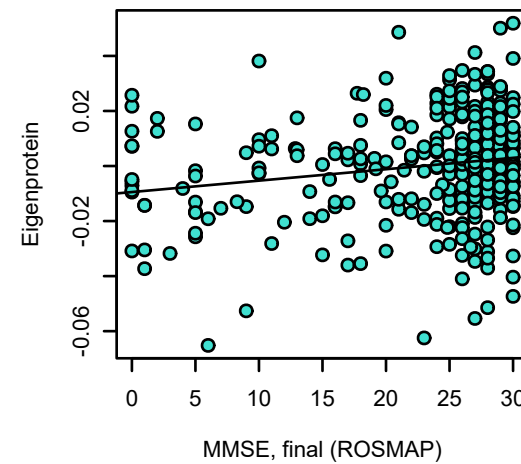

**bicor=-0.15, p=0.0062**  
**cor=-0.16, p=0.0039**

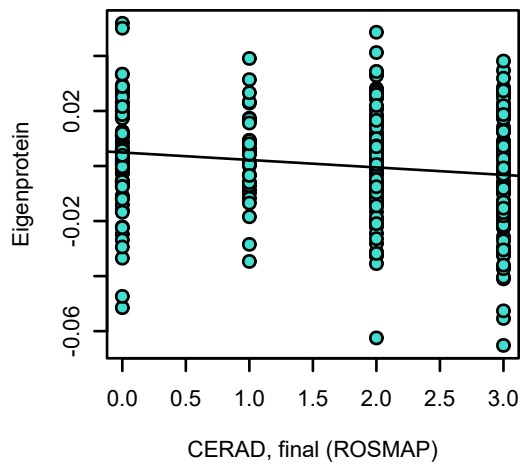

**bicor=-0.15, p=0.0059**  
**cor=-0.18, p=0.0012**

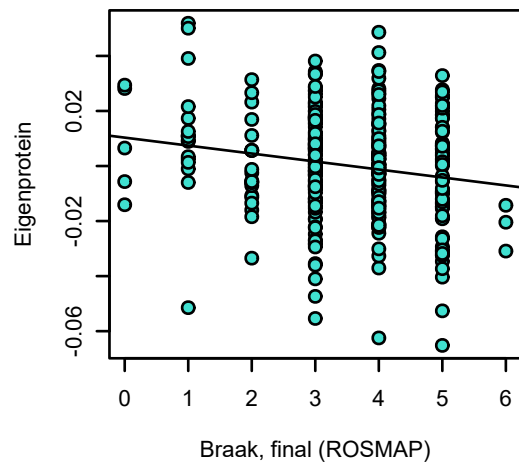

**bicor=-0.01, p=0.86**  
**cor=0.0082, p=0.88**

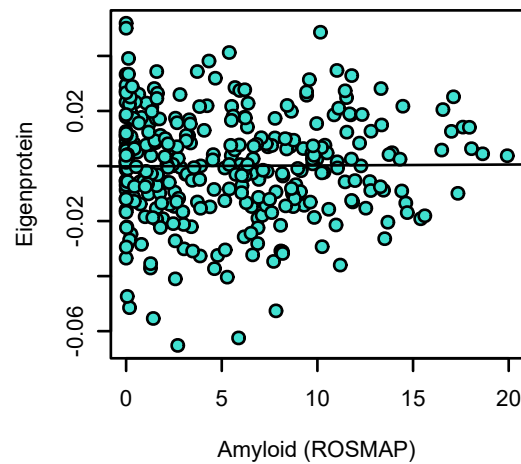

**bicor=-0.091, p=0.1**  
**cor=-0.16, p=0.004**

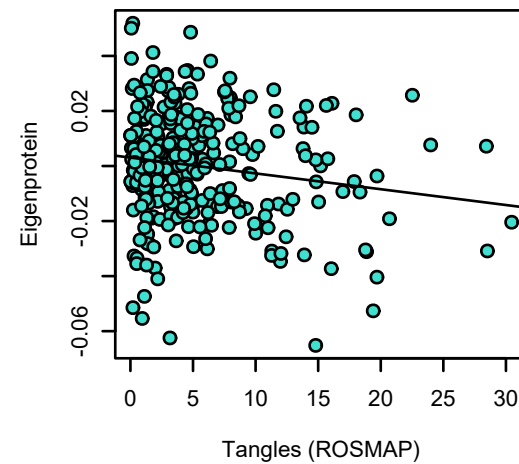

**bicor=-0.14, p=0.015**  
**cor=-0.15, p=0.0069**

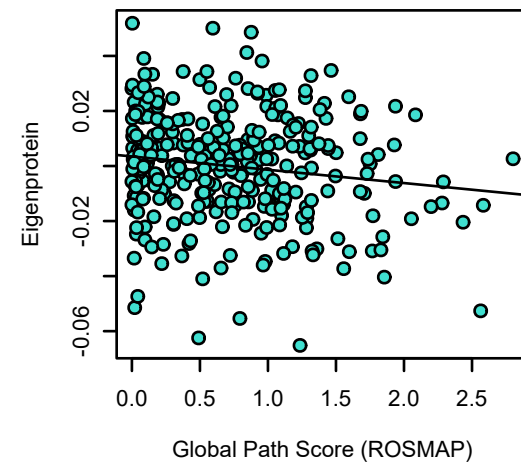

**M12 tan.Consensus**

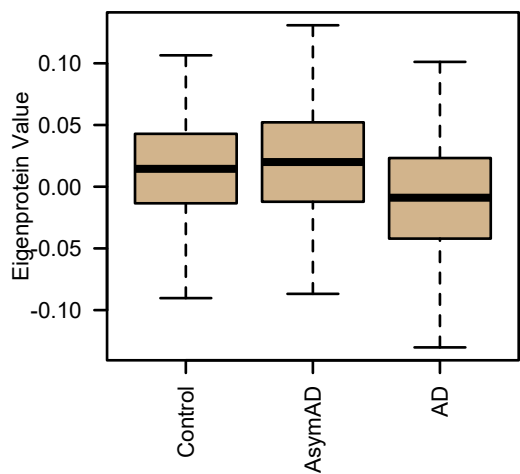

**M12 tan.ROSMAP TMT (Synthetic)**  
K-W ANOVA p: 0.00047

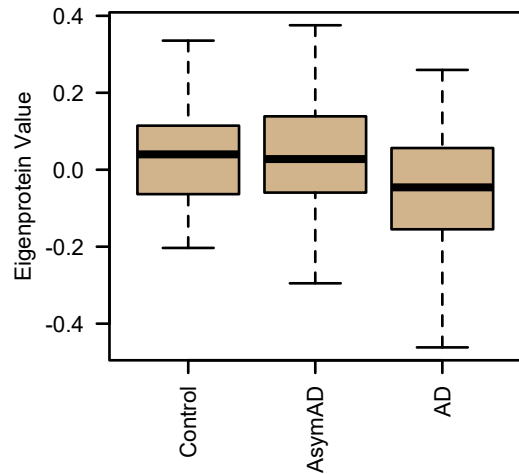

**M12 tan**  
ND K-W p = 0.92 | AD K-W p = 0.14

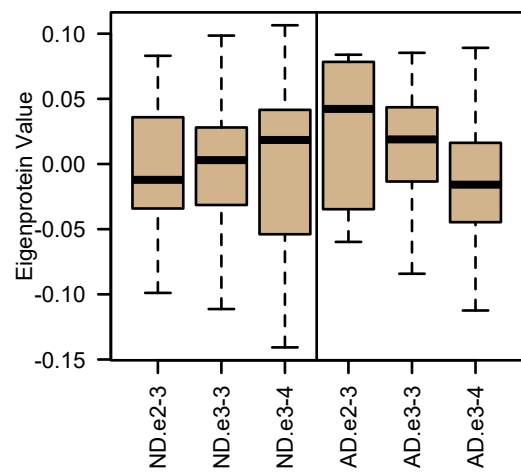

**bicor=0.18, p=0.00087**  
**cor=0.18, p=0.0012**

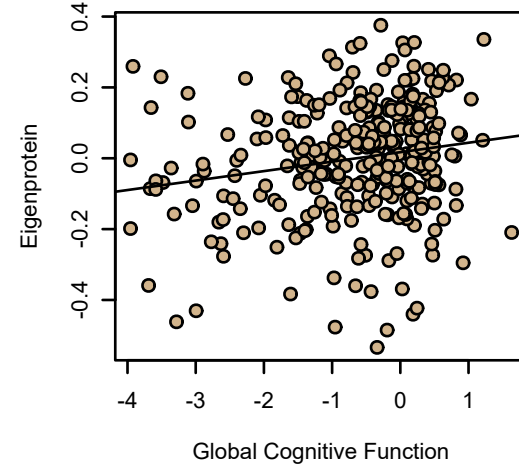

**bicor=0.19, p=0.00045**  
**cor=0.17, p=0.0022**

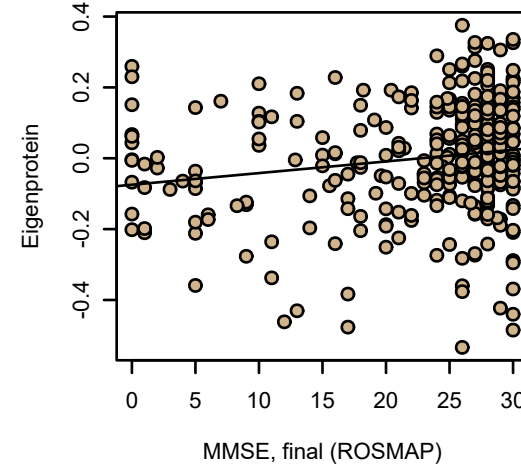

**bicor=-0.14, p=0.014**  
**cor=-0.15, p=0.0069**

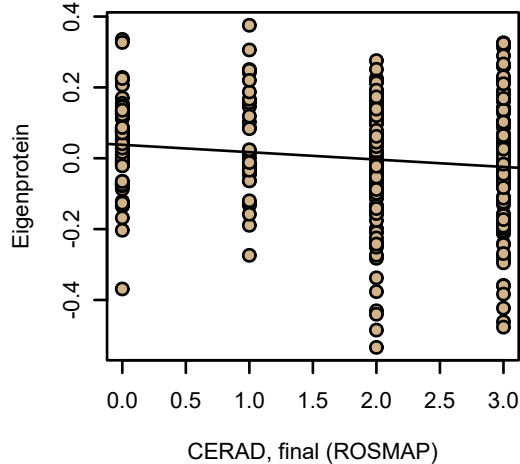

**bicor=-0.17, p=0.002**  
**cor=-0.18, p=0.0012**

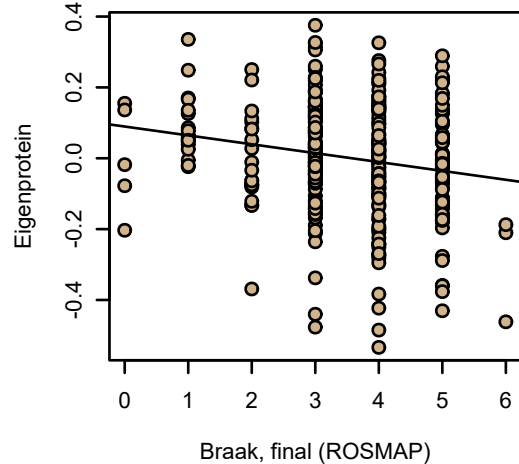

**bicor=-0.13, p=0.019**  
**cor=-0.12, p=0.031**

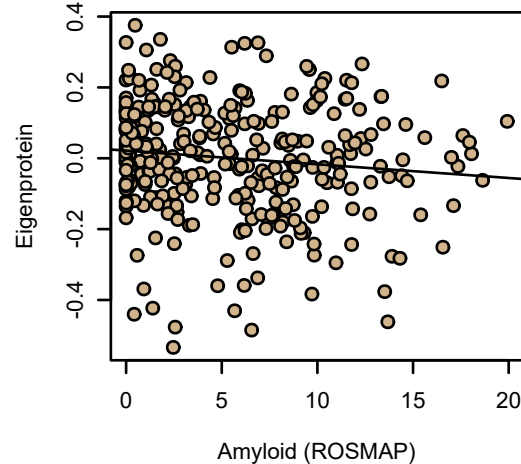

**bicor=-0.13, p=0.019**  
**cor=-0.14, p=0.012**

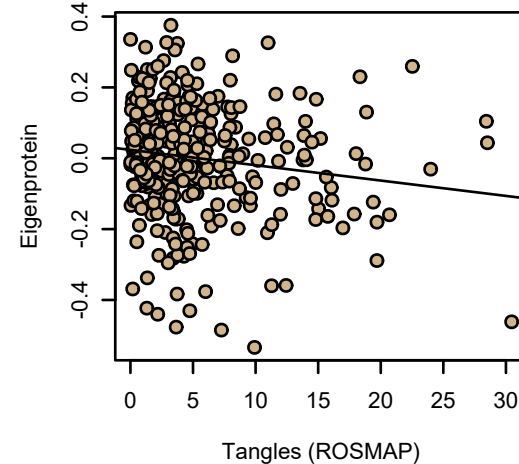

**bicor=-0.15, p=0.0056**  
**cor=-0.16, p=0.0039**

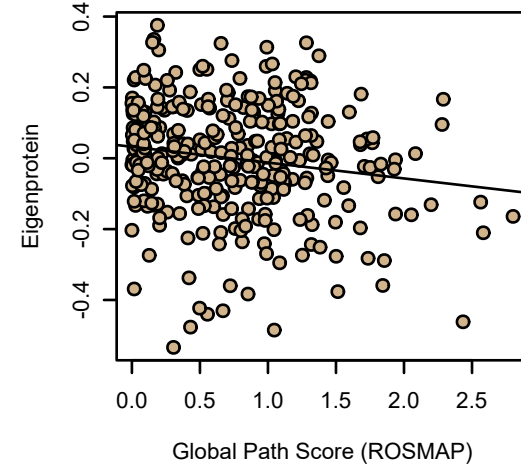

**M7 black.Consensus**

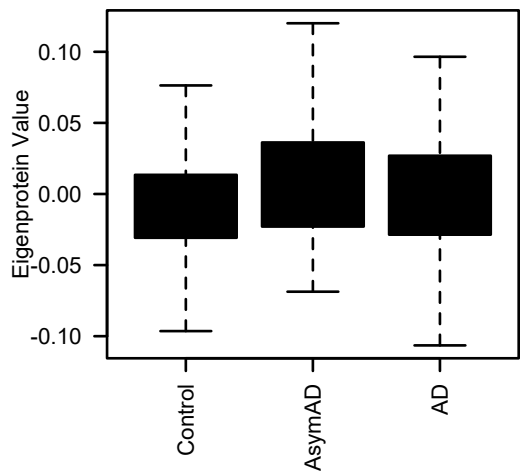

**M7 black.ROSMAP TMT (Synthetic)**  
K-W ANOVA p: 1.5e-05

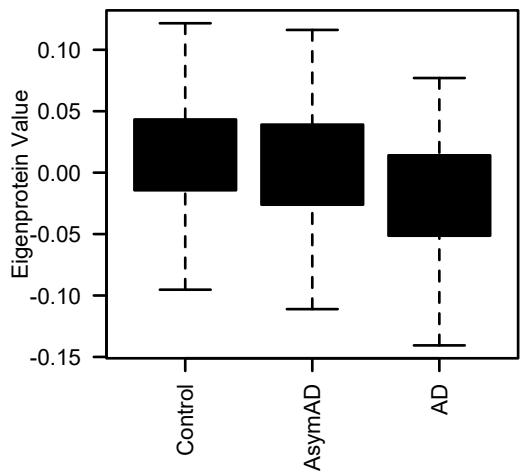

**M7 black**  
ND K-W p = 0.58 | AD K-W p = 0.96

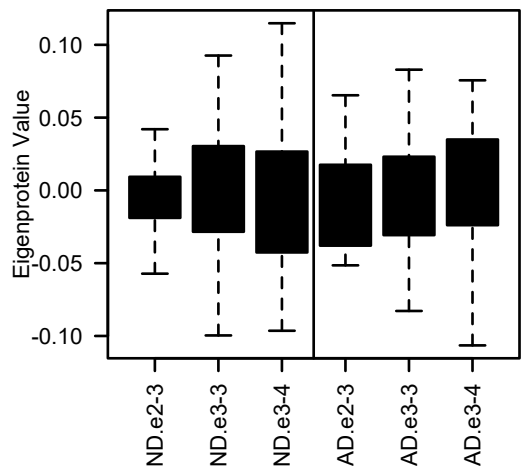

**bicor=0.25, p=3.7e-06**  
**cor=0.21, p=0.00014**

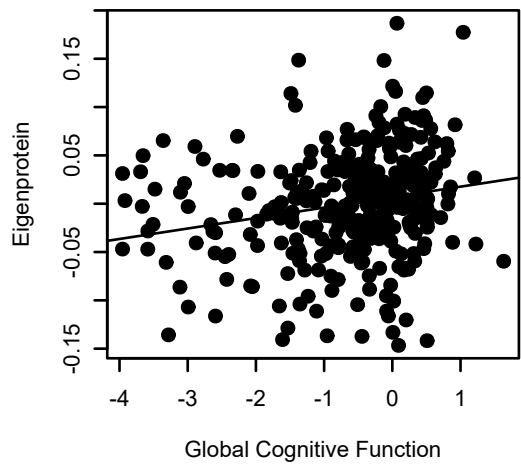

**bicor=0.27, p=1.3e-06**  
**cor=0.22, p=6.7e-05**

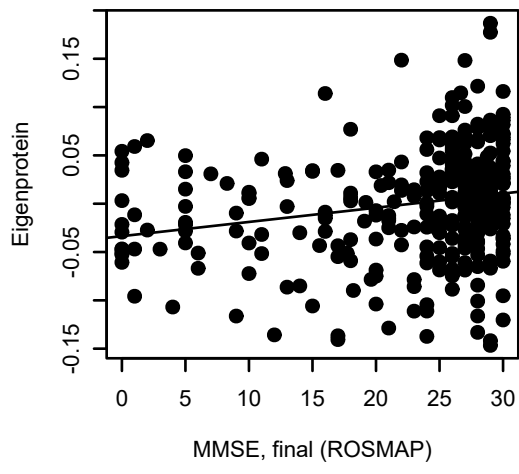

**bicor=-0.14, p=0.013**  
**cor=-0.15, p=0.0069**

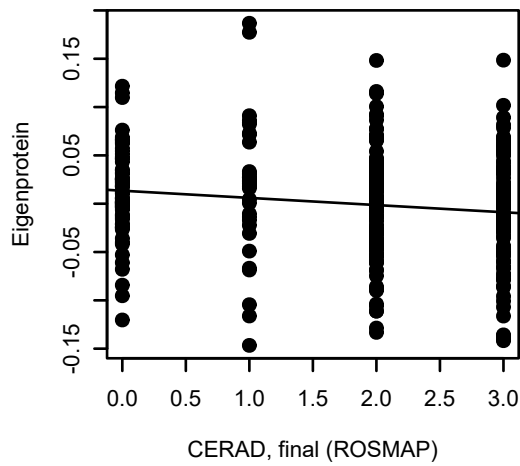

**bicor=-0.15, p=0.0087**  
**cor=-0.17, p=0.0022**

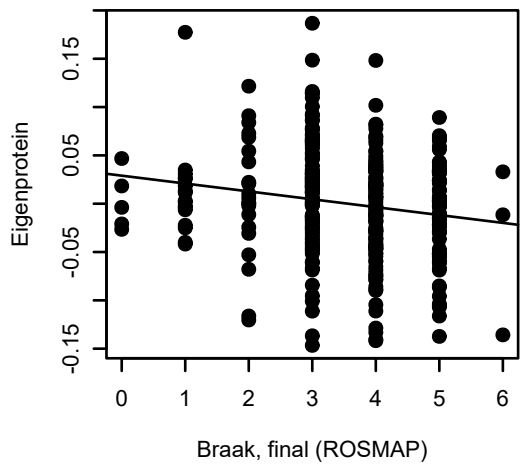

**bicor=-0.16, p=0.0044**  
**cor=-0.14, p=0.012**

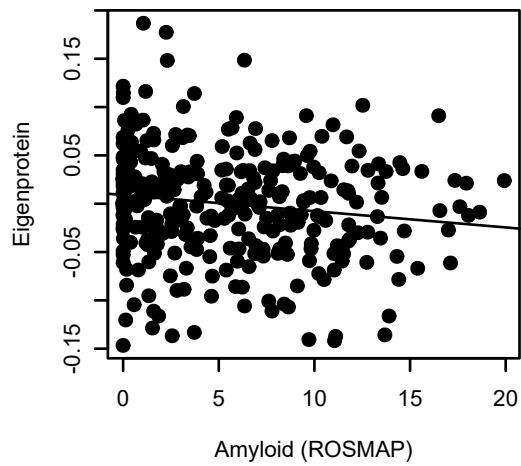

**bicor=-0.2, p=0.00028**  
**cor=-0.19, p=0.00061**

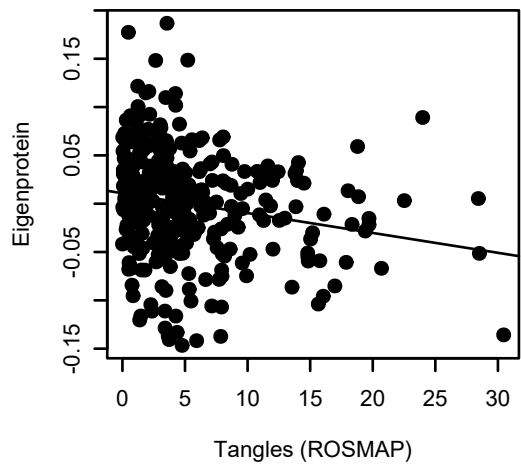

**bicor=-0.16, p=0.0031**  
**cor=-0.16, p=0.0039**

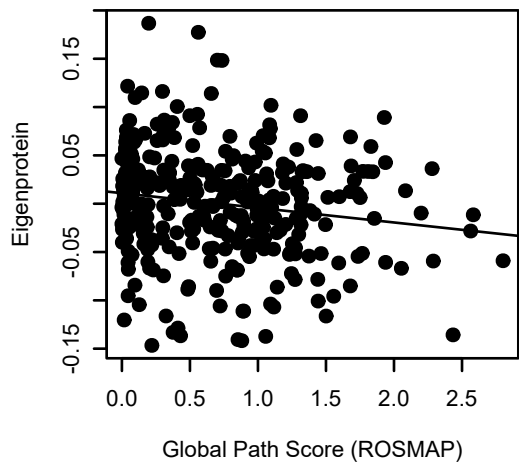

**M9 magenta.Consensus**

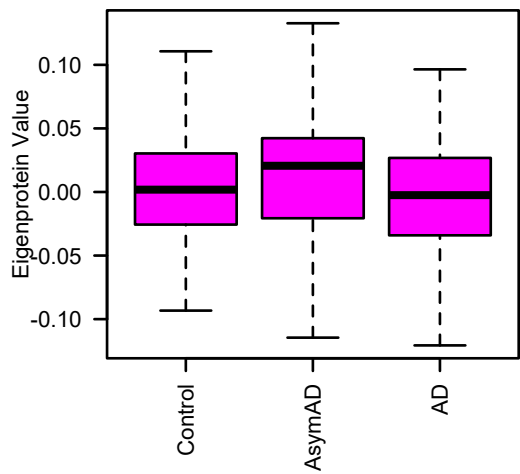

**M9 magenta.ROSMAP TMT (Synthetic)**  
K-W ANOVA p: 0.0073

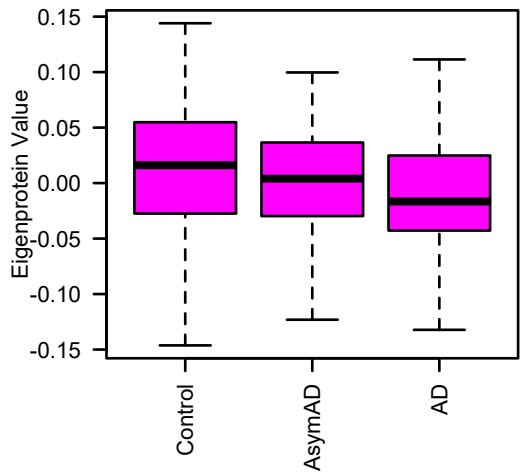

**M9 magenta**  
ND K-W p = 0.74 | AD K-W p = 0.96

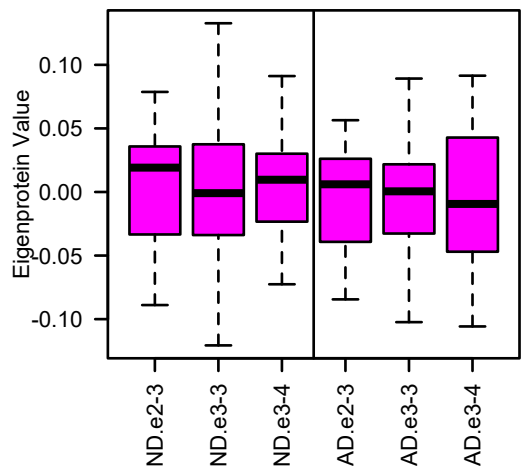

**bicor=0.15, p=0.0075**  
**cor=0.12, p=0.031**

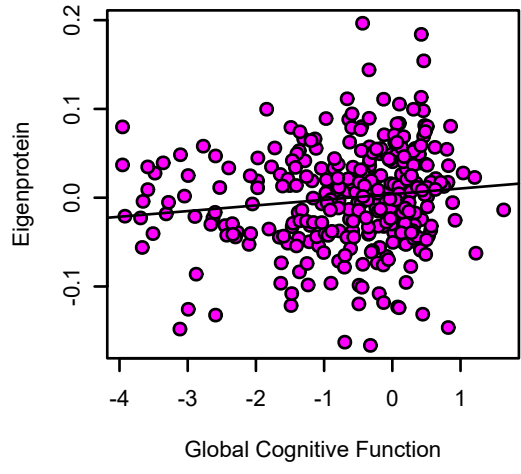

**bicor=0.13, p=0.025**  
**cor=0.13, p=0.019**

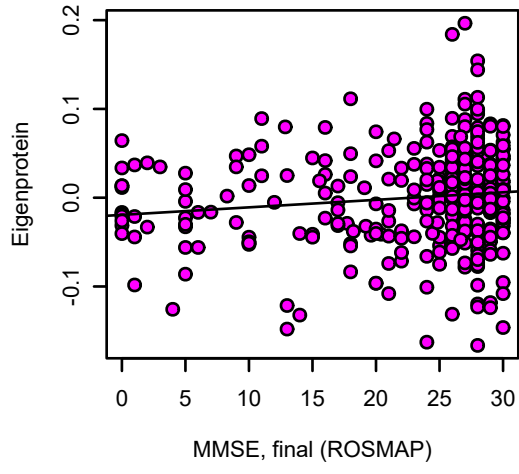

**bicor=-0.13, p=0.019**  
**cor=-0.13, p=0.019**

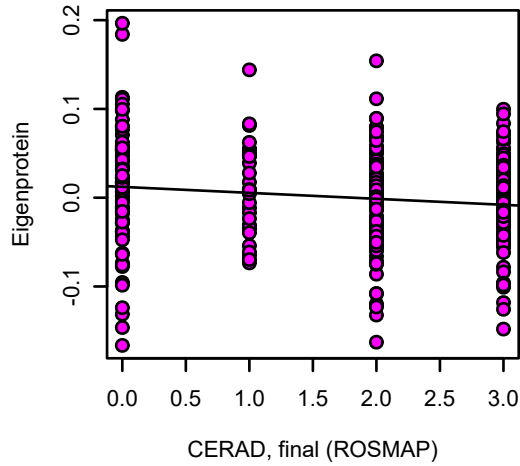

**bicor=-0.09, p=0.11**  
**cor=-0.13, p=0.019**

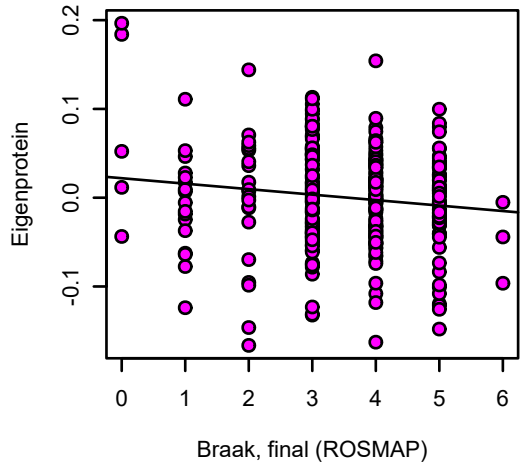

**bicor=-0.079, p=0.16**  
**cor=-0.072, p=0.2**

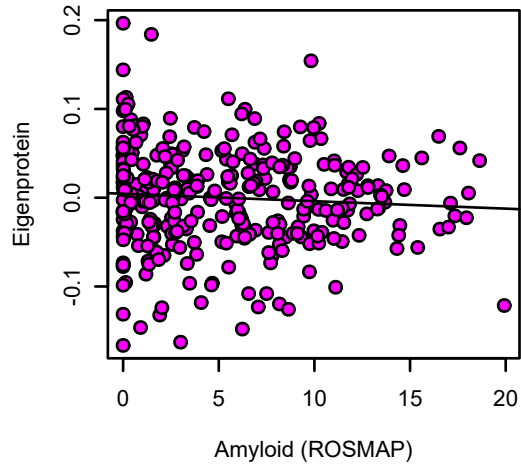

**bicor=-0.13, p=0.015**  
**cor=-0.15, p=0.007**

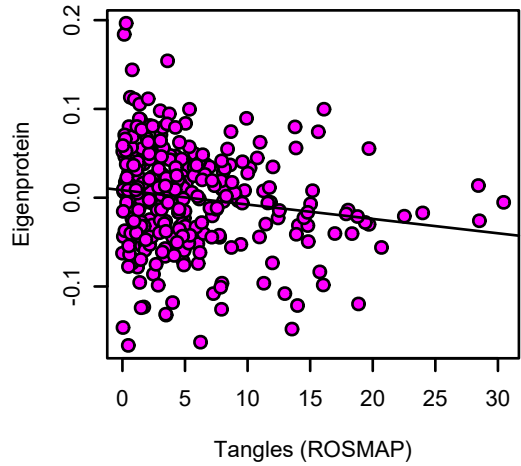

**bicor=-0.17, p=0.002**  
**cor=-0.17, p=0.0022**

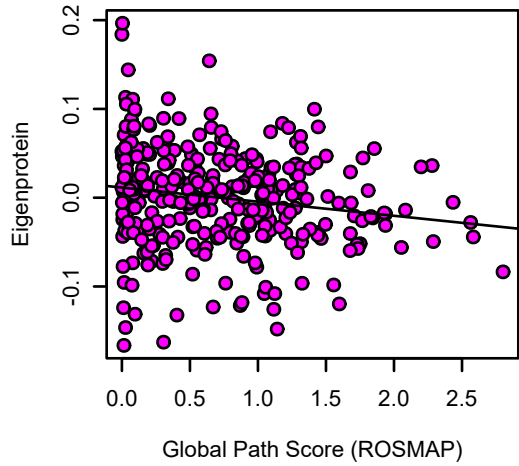



**Supplementary Figure 4. AD Network Validation in ROS/MAP.** The top 20% of proteins by kME value in each AD brain protein network module was used to create a synthetic eigenprotein, which was then measured by case status in ROS/MAP and correlated with different traits as assessed in the ROS/MAP cohorts ( $n=323$  independent case samples after network connectivity outlier removal). The first boxplot for each module is the AD network eigenprotein by case status, given as reference for the second boxplot, which is the synthetic eigenprotein in the ROS/MAP cohorts (control,  $n=78$ ; AsymAD,  $n=142$ ; AD,  $n=103$ ). Control and AsymAD cases were grouped into non-demented (ND) in the *APOE* analysis for sufficient statistical power (ND:  $n=31$  E2/3,  $n=144$  E3/3,  $n=36$  E3/4; AD:  $n=10$  E2/3,  $n=65$  E3/3,  $n=25$  E3/4). E2/2 ( $n=2$  control,  $n=1$  AsymAD) and E2/4 ( $n=6$  AsymAD,  $n=3$  AD) were excluded from the analysis. Synthetic eigenprotein differences by case status or *APOE* genotype in ROS/MAP were assessed by Kruskal-Wallis (K-W) one-way ANOVA. Correlations were performed using both Pearson correlation (cor) and biweight midcorrelation (bicor), which is more robust to outliers. Statistical significance at  $p < 0.05$  is highlighted in red. Boxplots represent the median, 25<sup>th</sup>, and 75<sup>th</sup> percentiles, and whiskers represent measurements to the 5<sup>th</sup> and 95<sup>th</sup> percentiles.

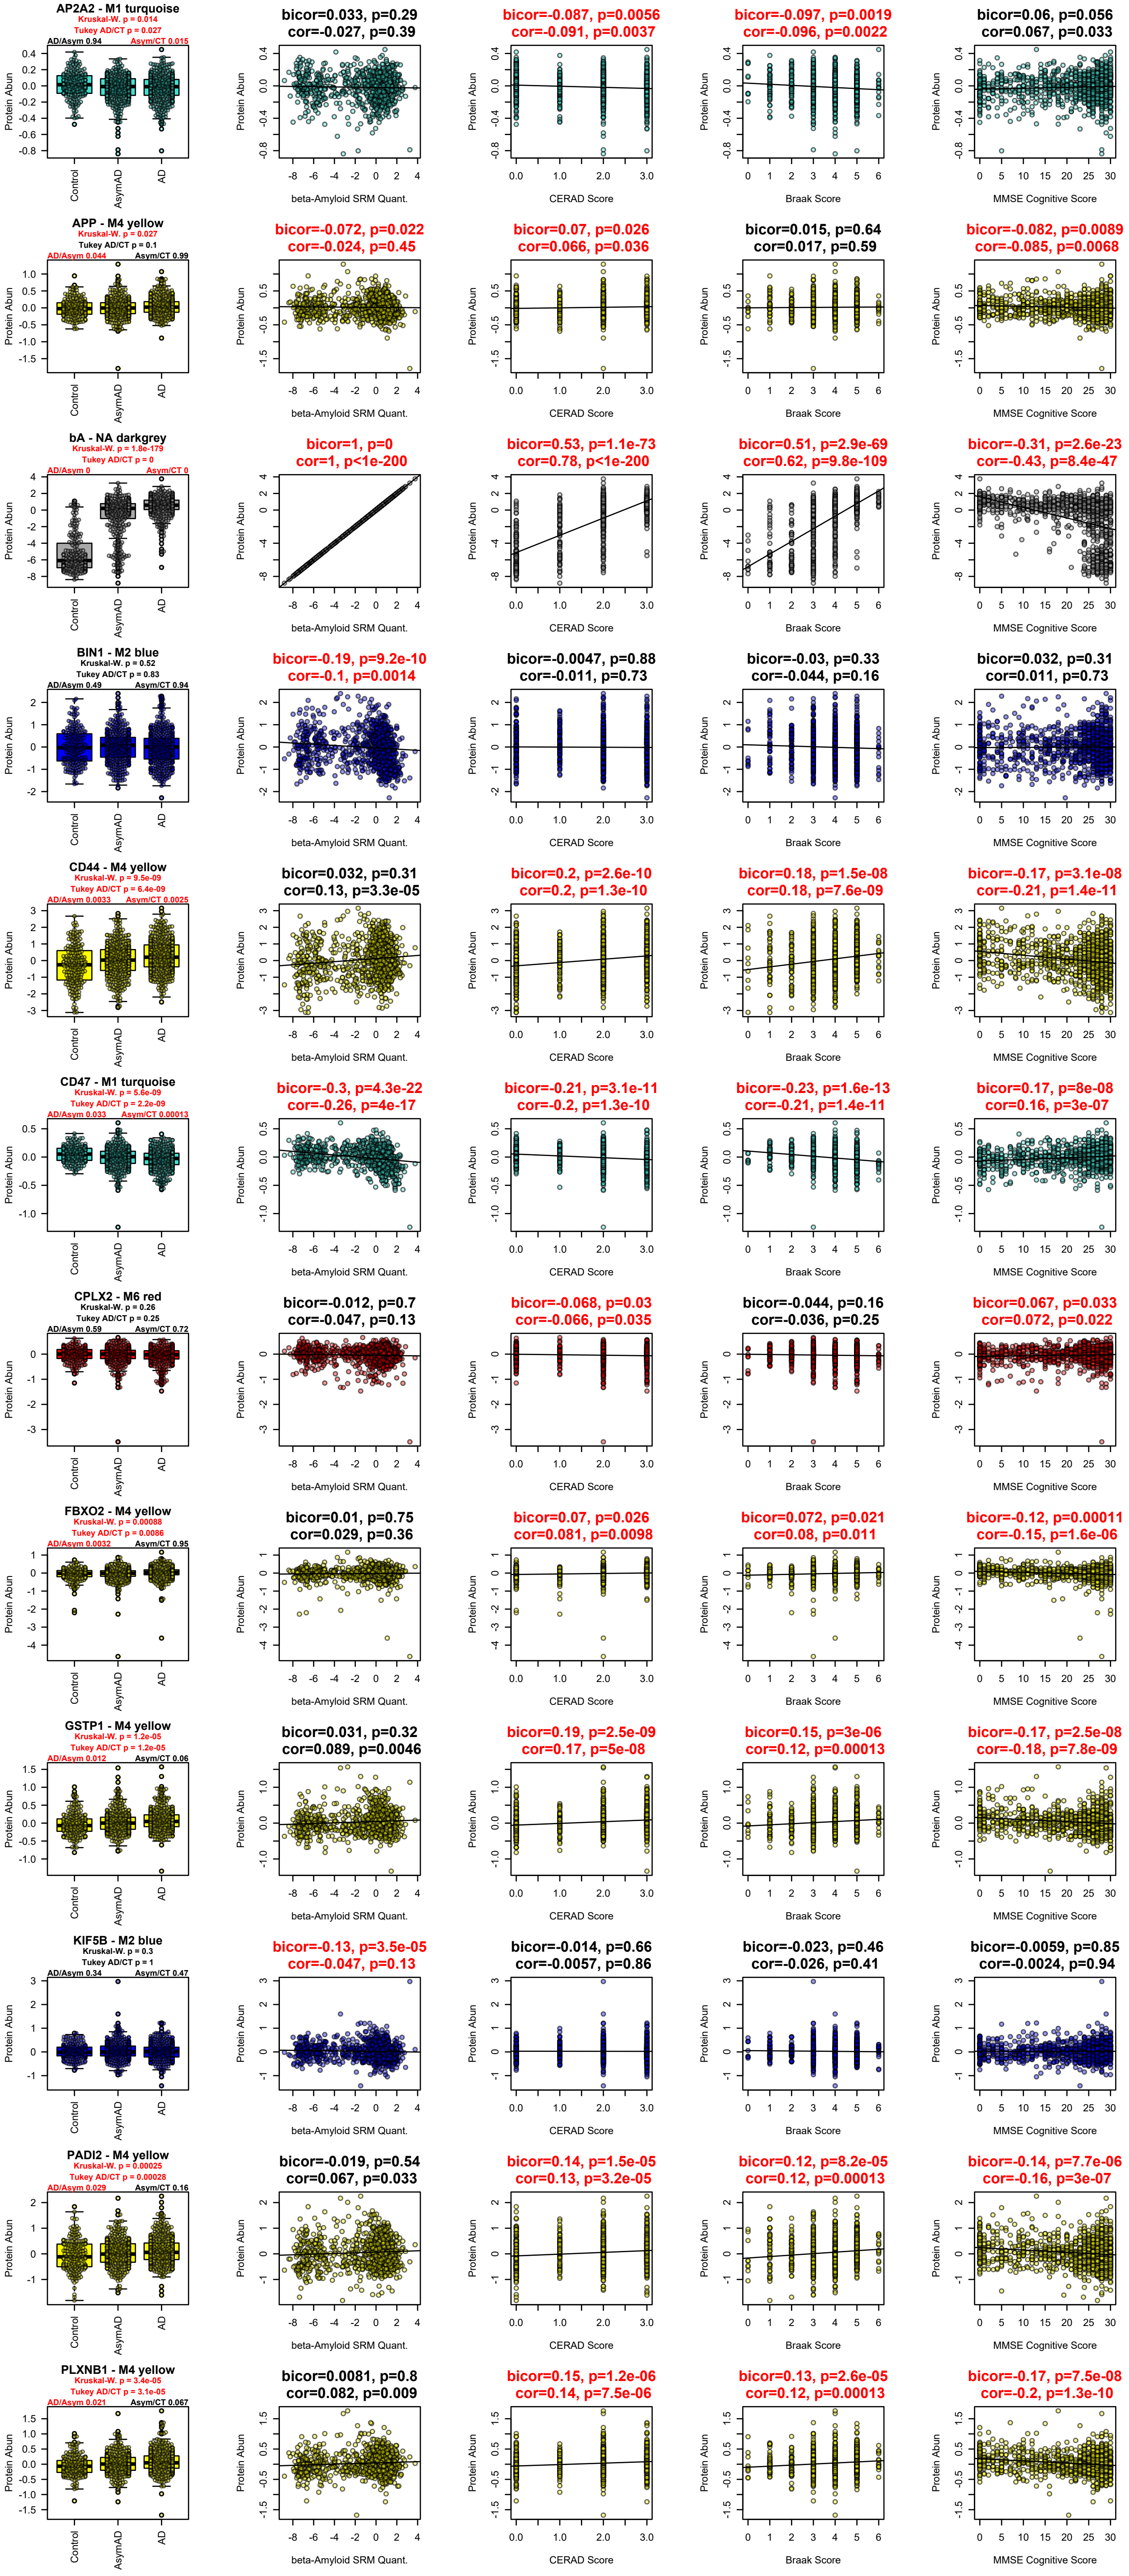

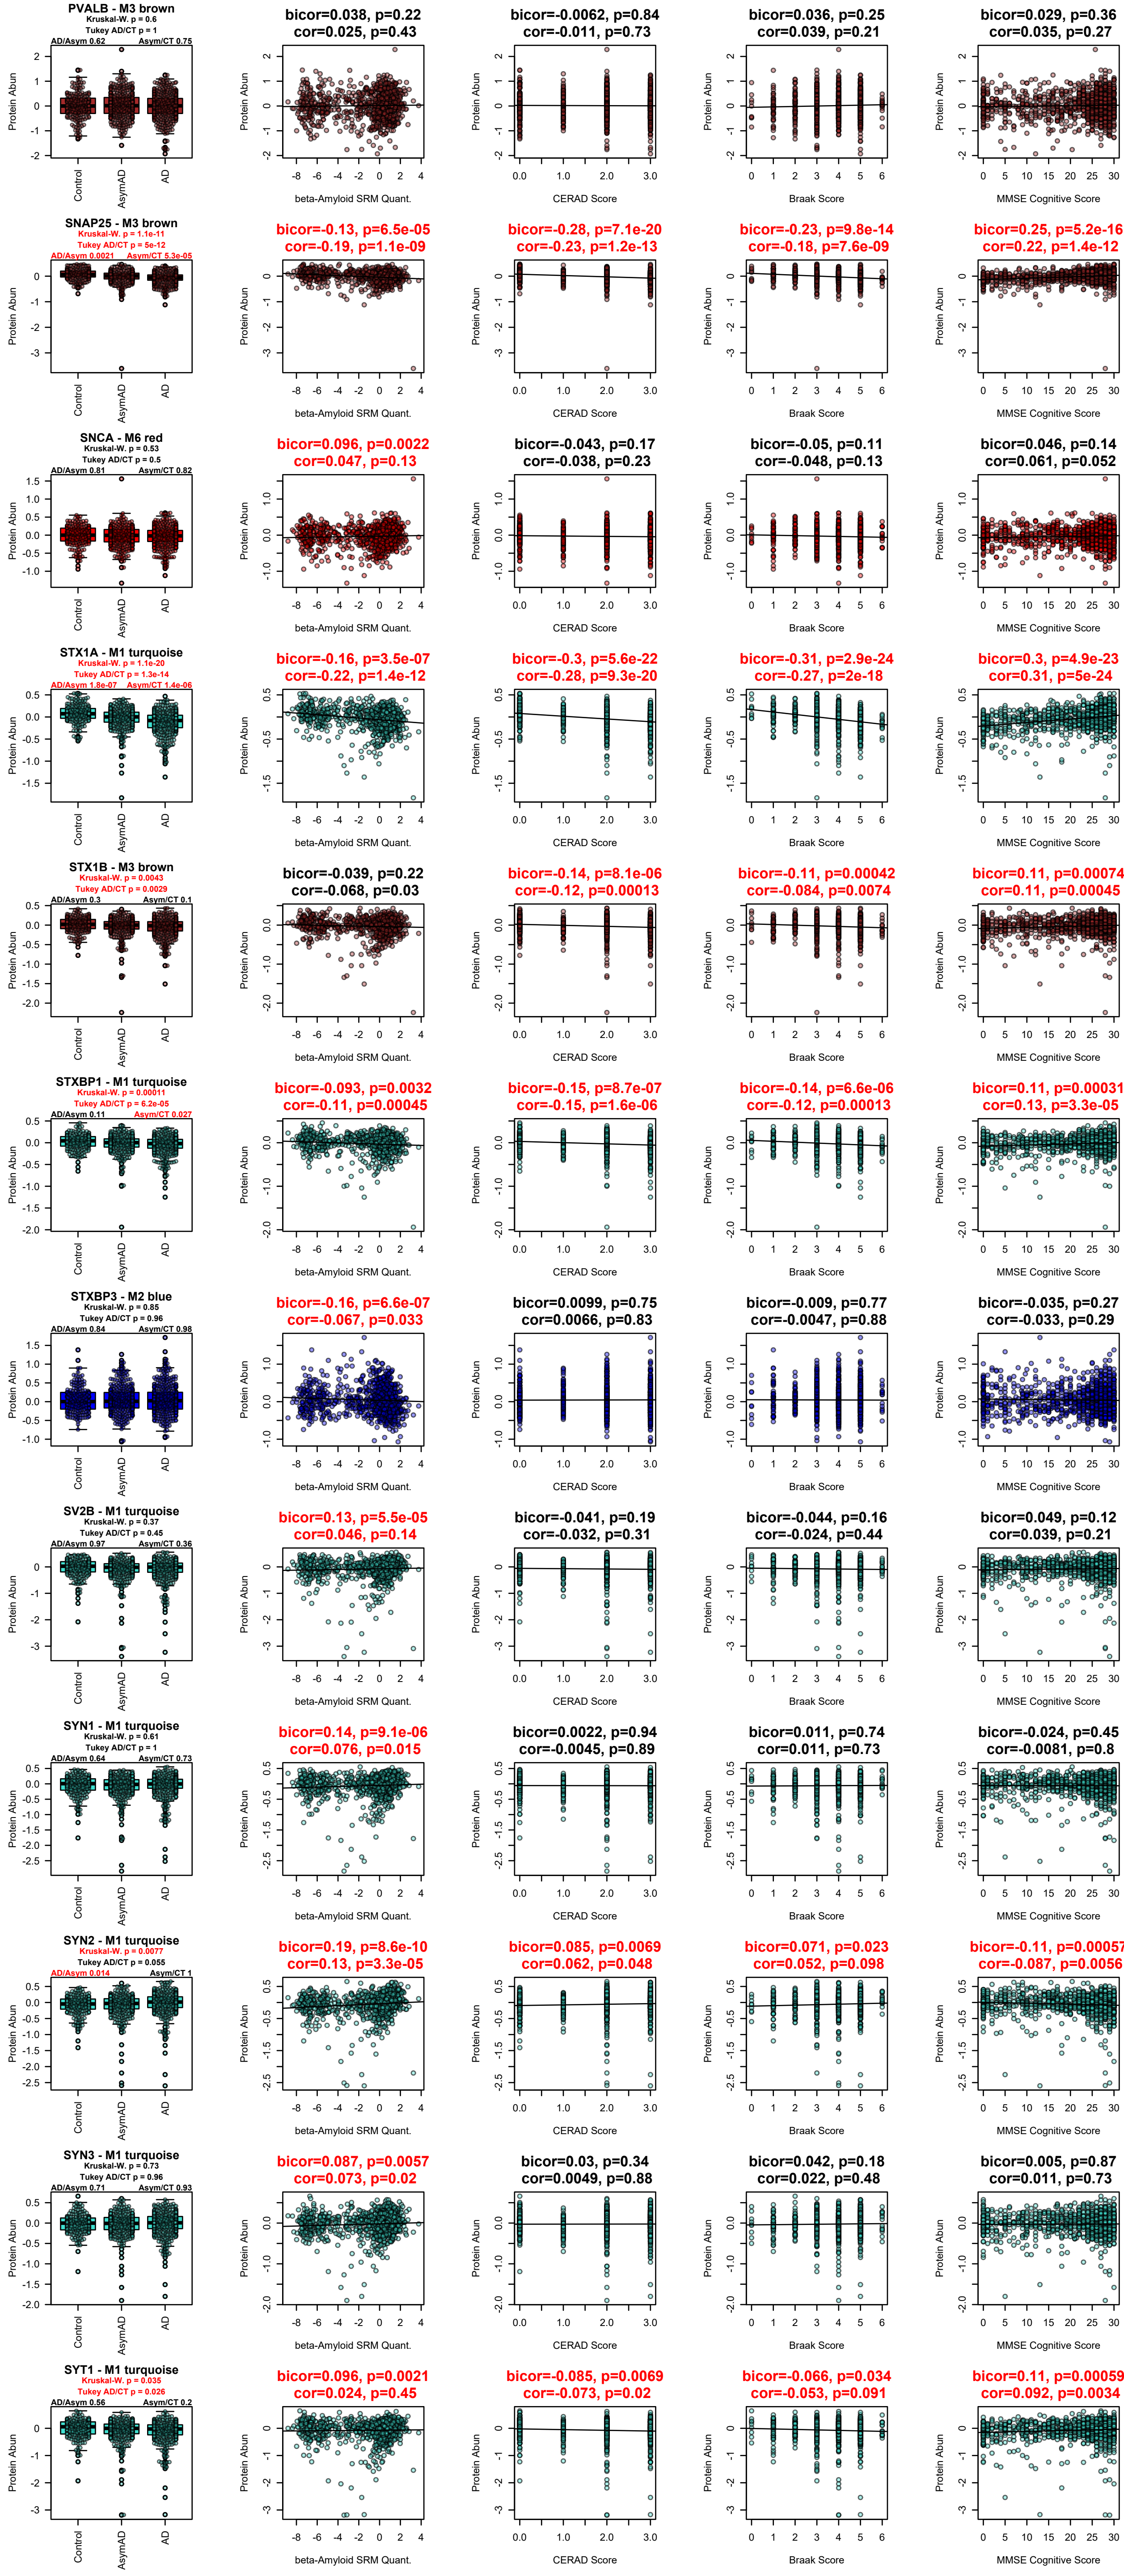

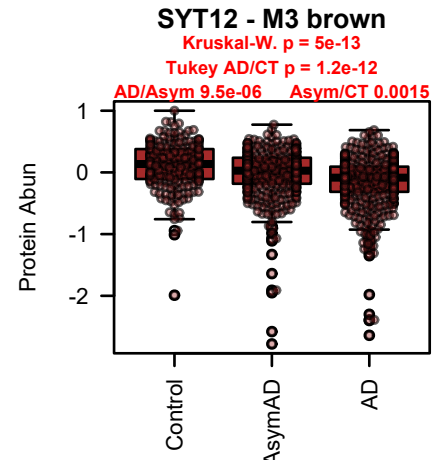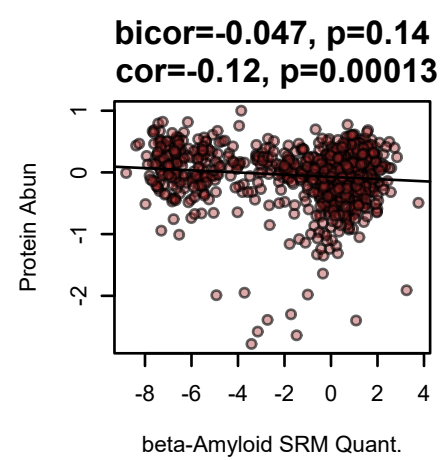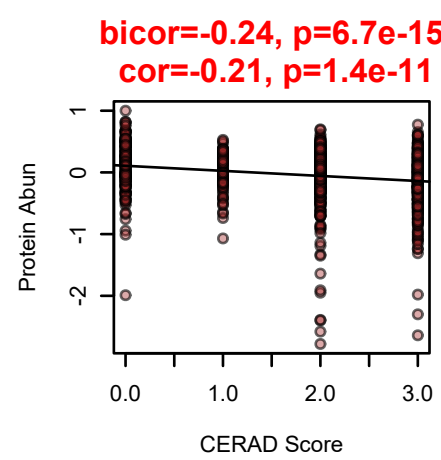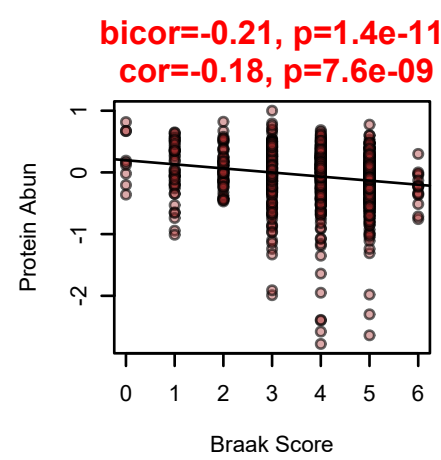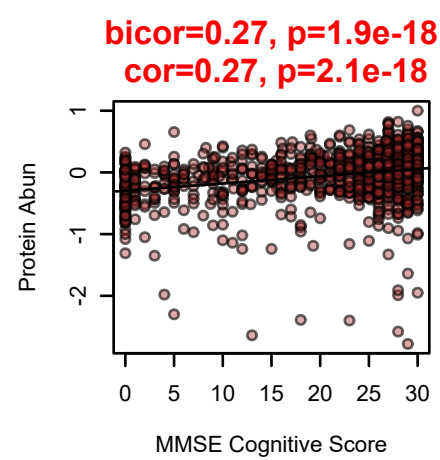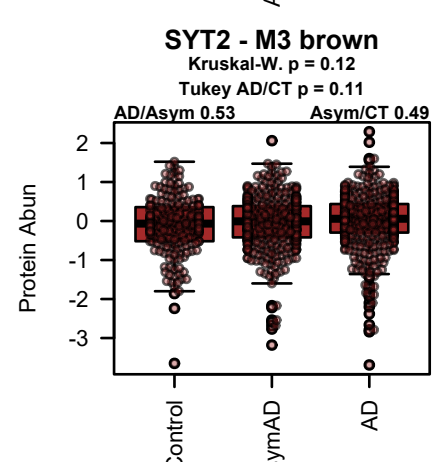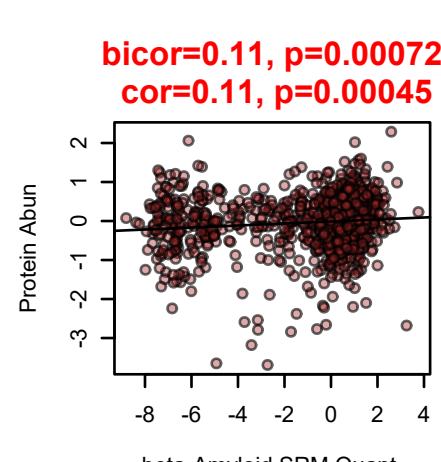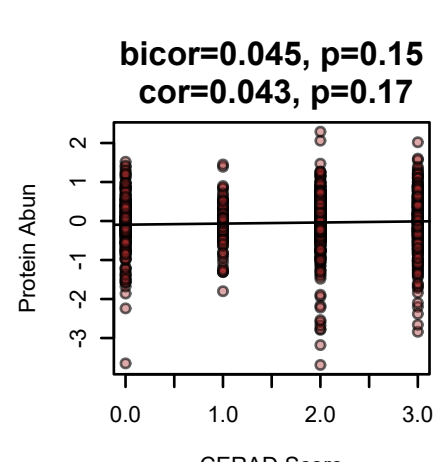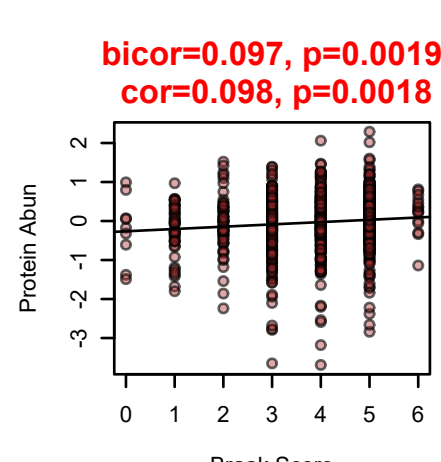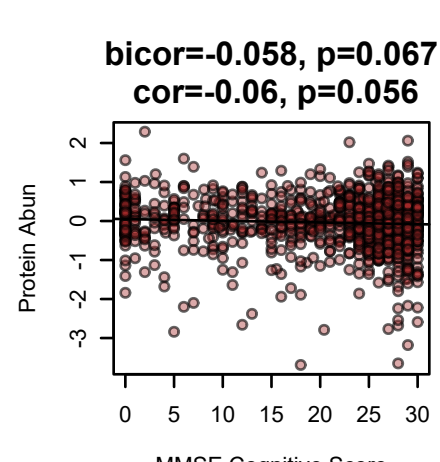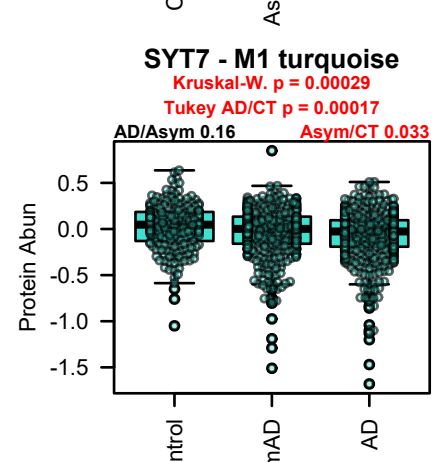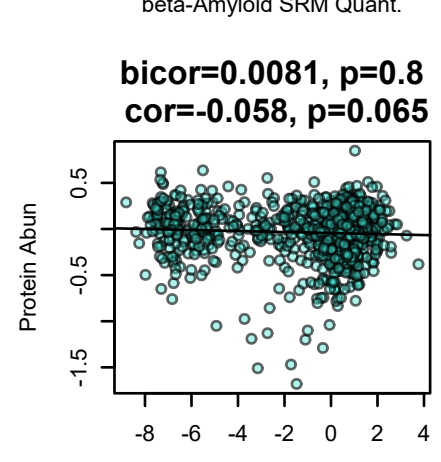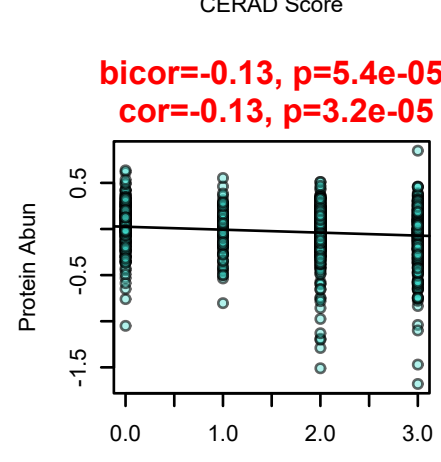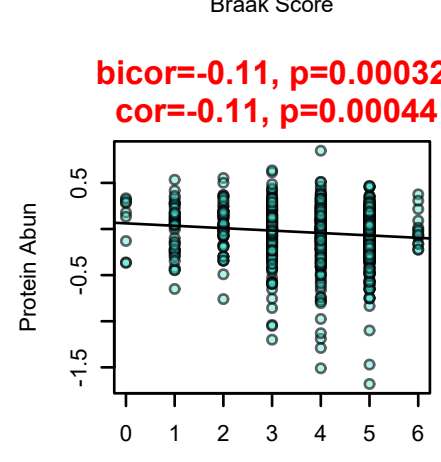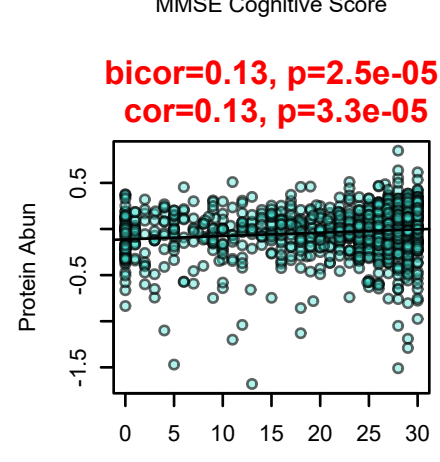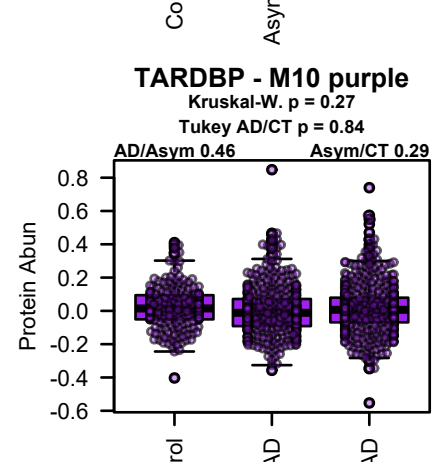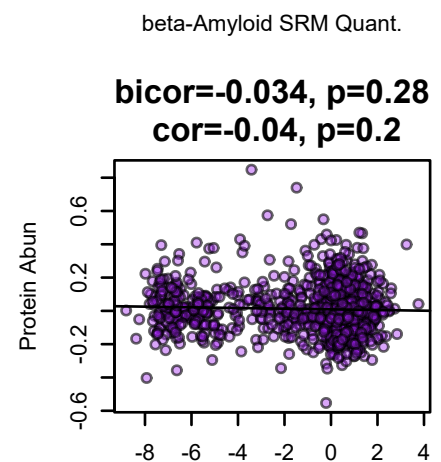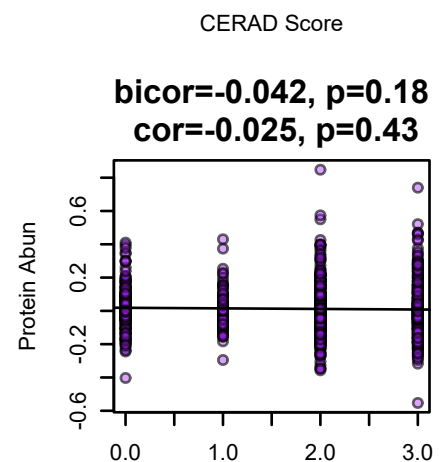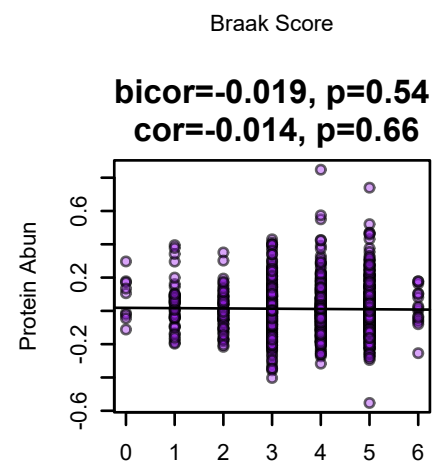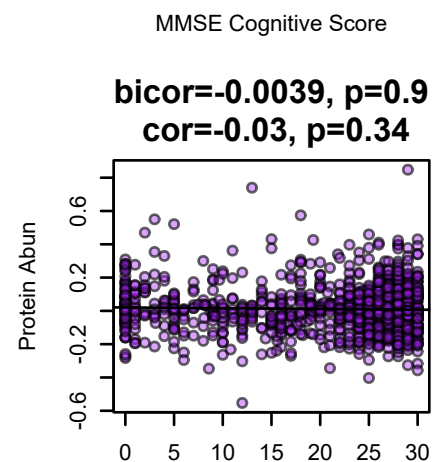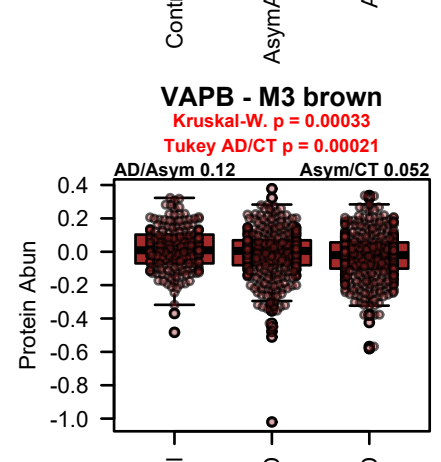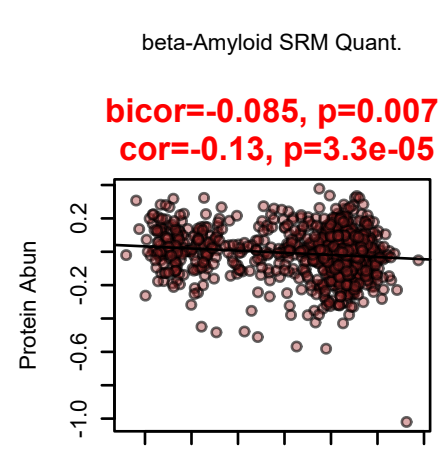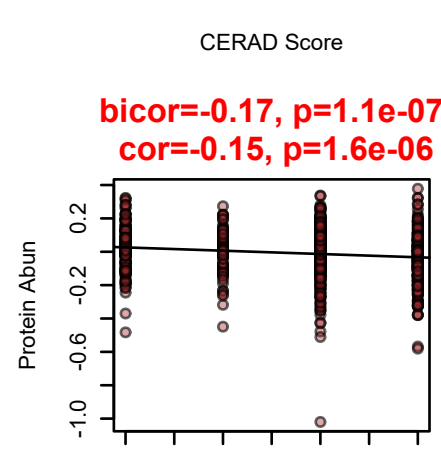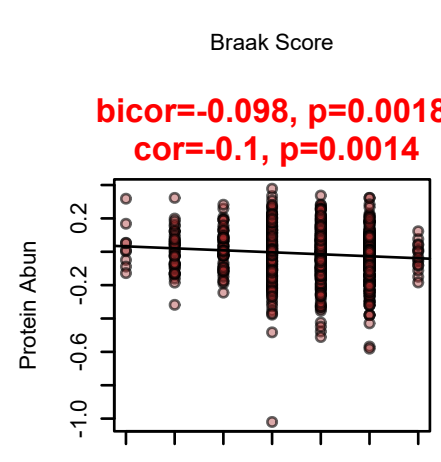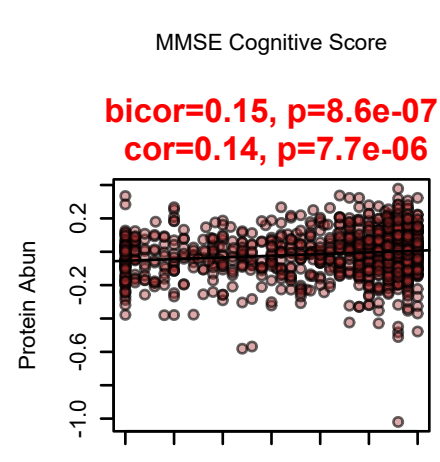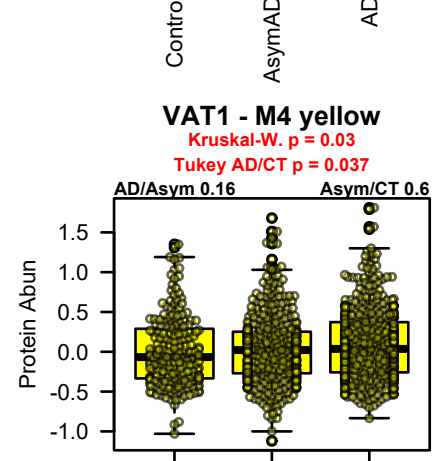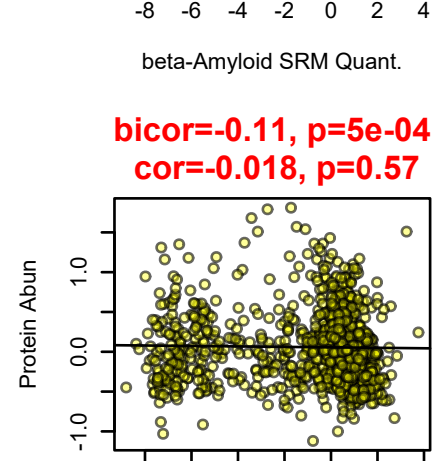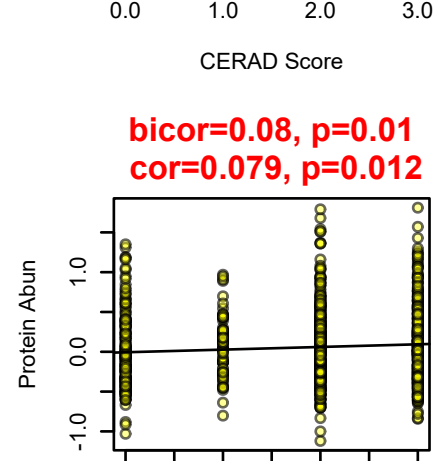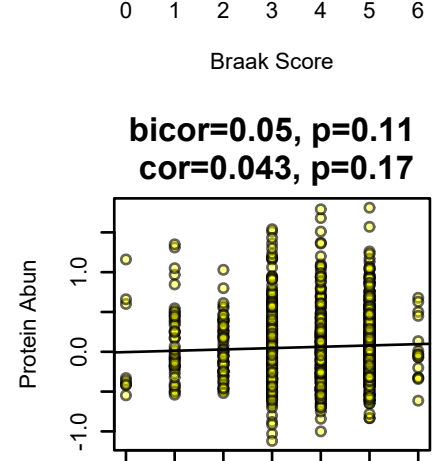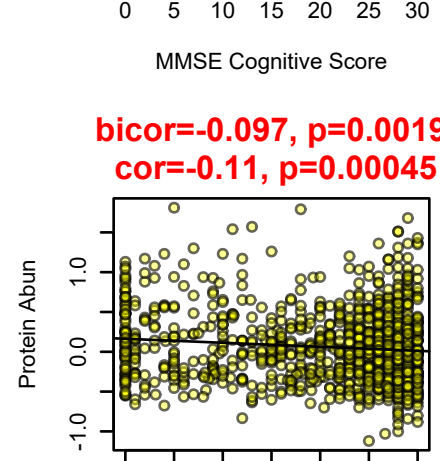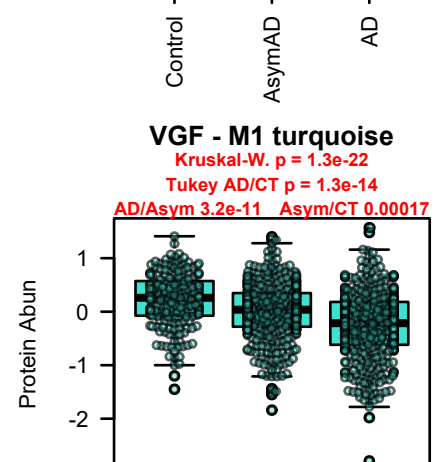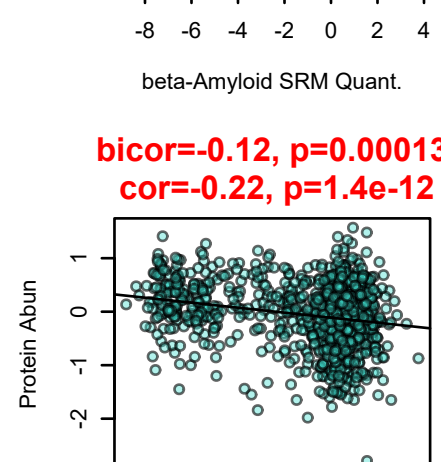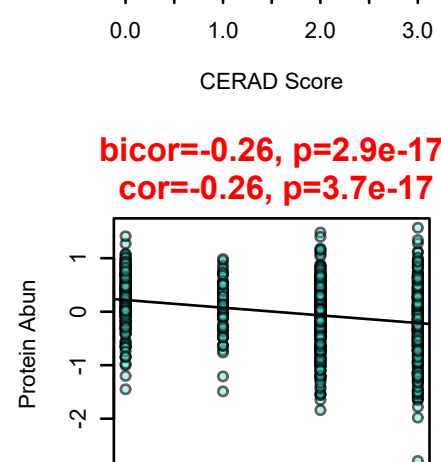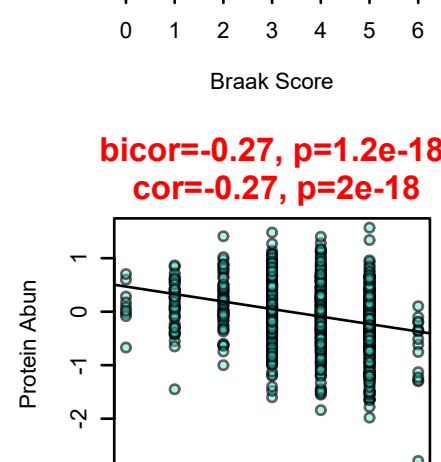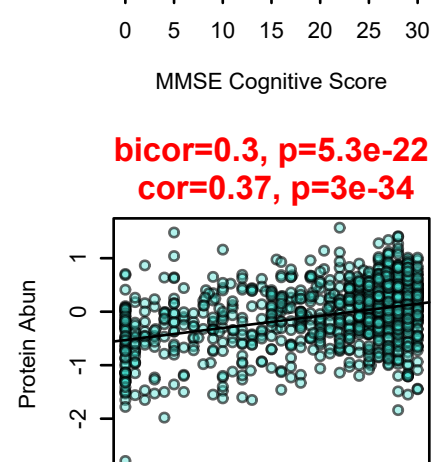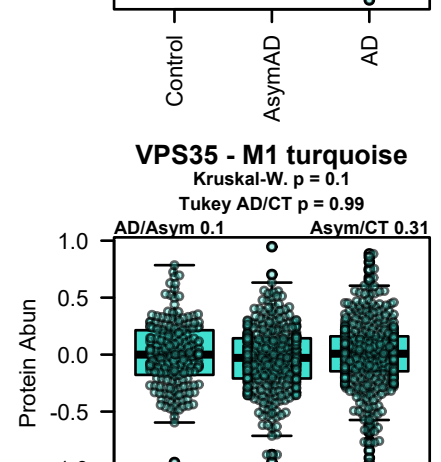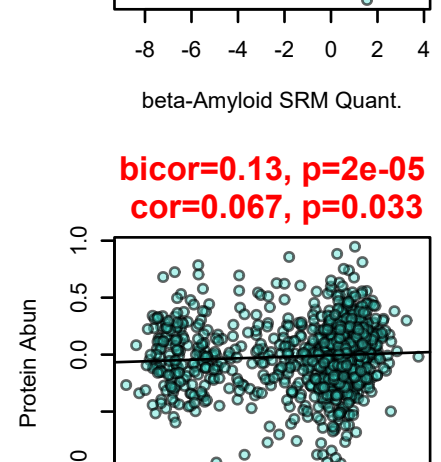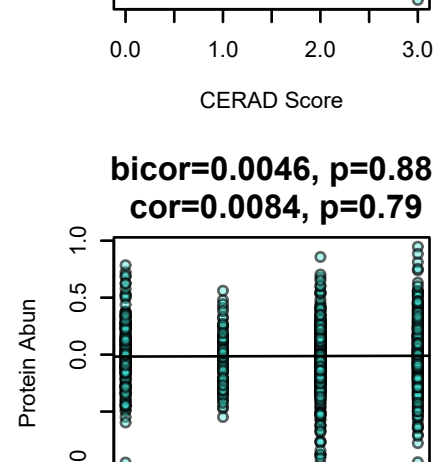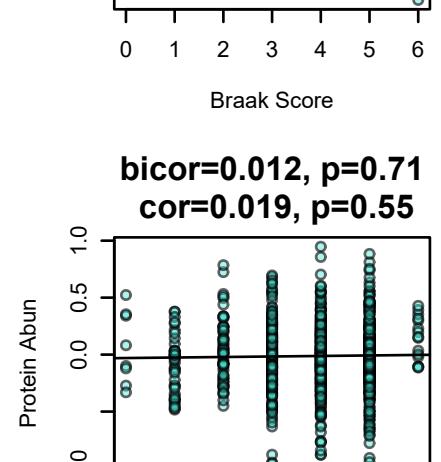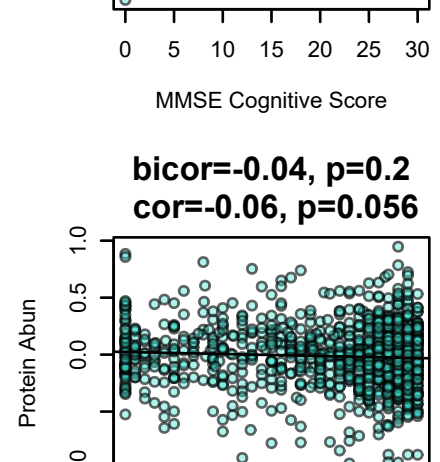

**Supplementary Figure 5. Round 1 Targeted Measurements of AD Network Proteins in ROS/MAP.** Levels of 67 proteins were measured by selected reaction monitoring (SRM) mass spectrometry across 1016 ROS/MAP cases (control,  $n=139$ ; AsymAD,  $n=384$ ; AD,  $n=439$  independent case samples). One peptide per protein was selected for measurement. Peptide sequences can be found at <https://www.synapse.org/#!Synapse:syn10468856>. Protein levels were correlated to A $\beta$  levels as measured by SRM, CERAD score, Braak stage, and MMSE. Protein level differences by case status were assessed by Kruskal-Wallis (K-W) one-way ANOVA with Tukey test. Correlations were performed using both Pearson correlation (cor) and biweight midcorrelation (bicor), which is more robust to outliers. Data for each protein is colored by the AD network module in which it resides. Statistical significance at  $p < 0.05$  is highlighted in red. Boxplots represent the median, 25<sup>th</sup>, and 75<sup>th</sup> percentiles, and whiskers represent measurements to the 5<sup>th</sup> and 95<sup>th</sup> percentiles.

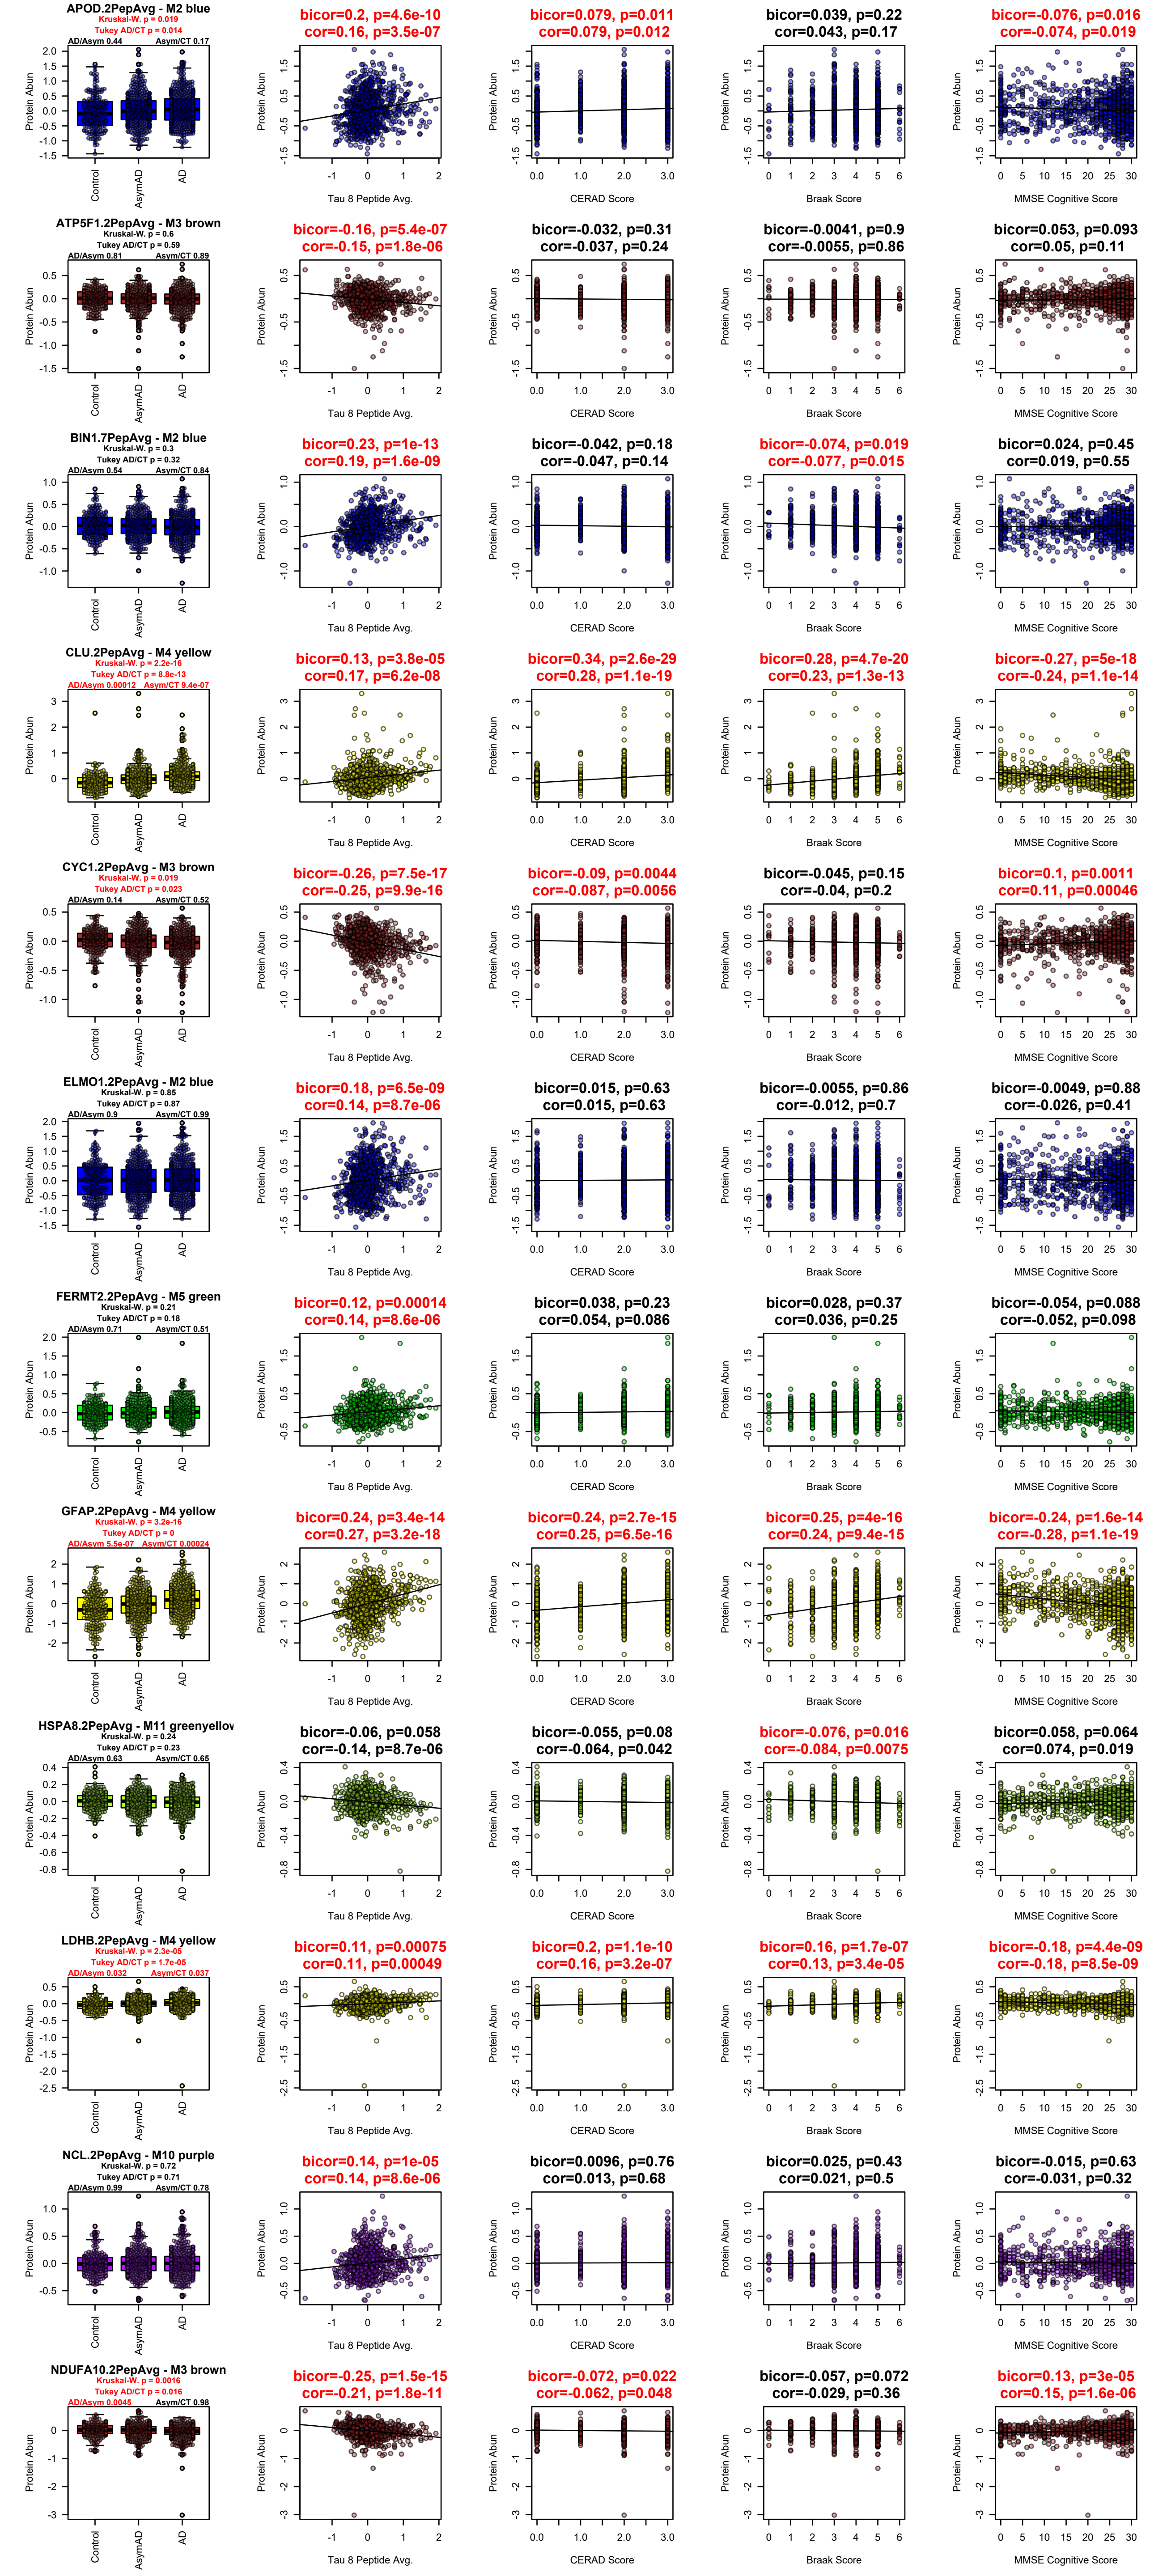

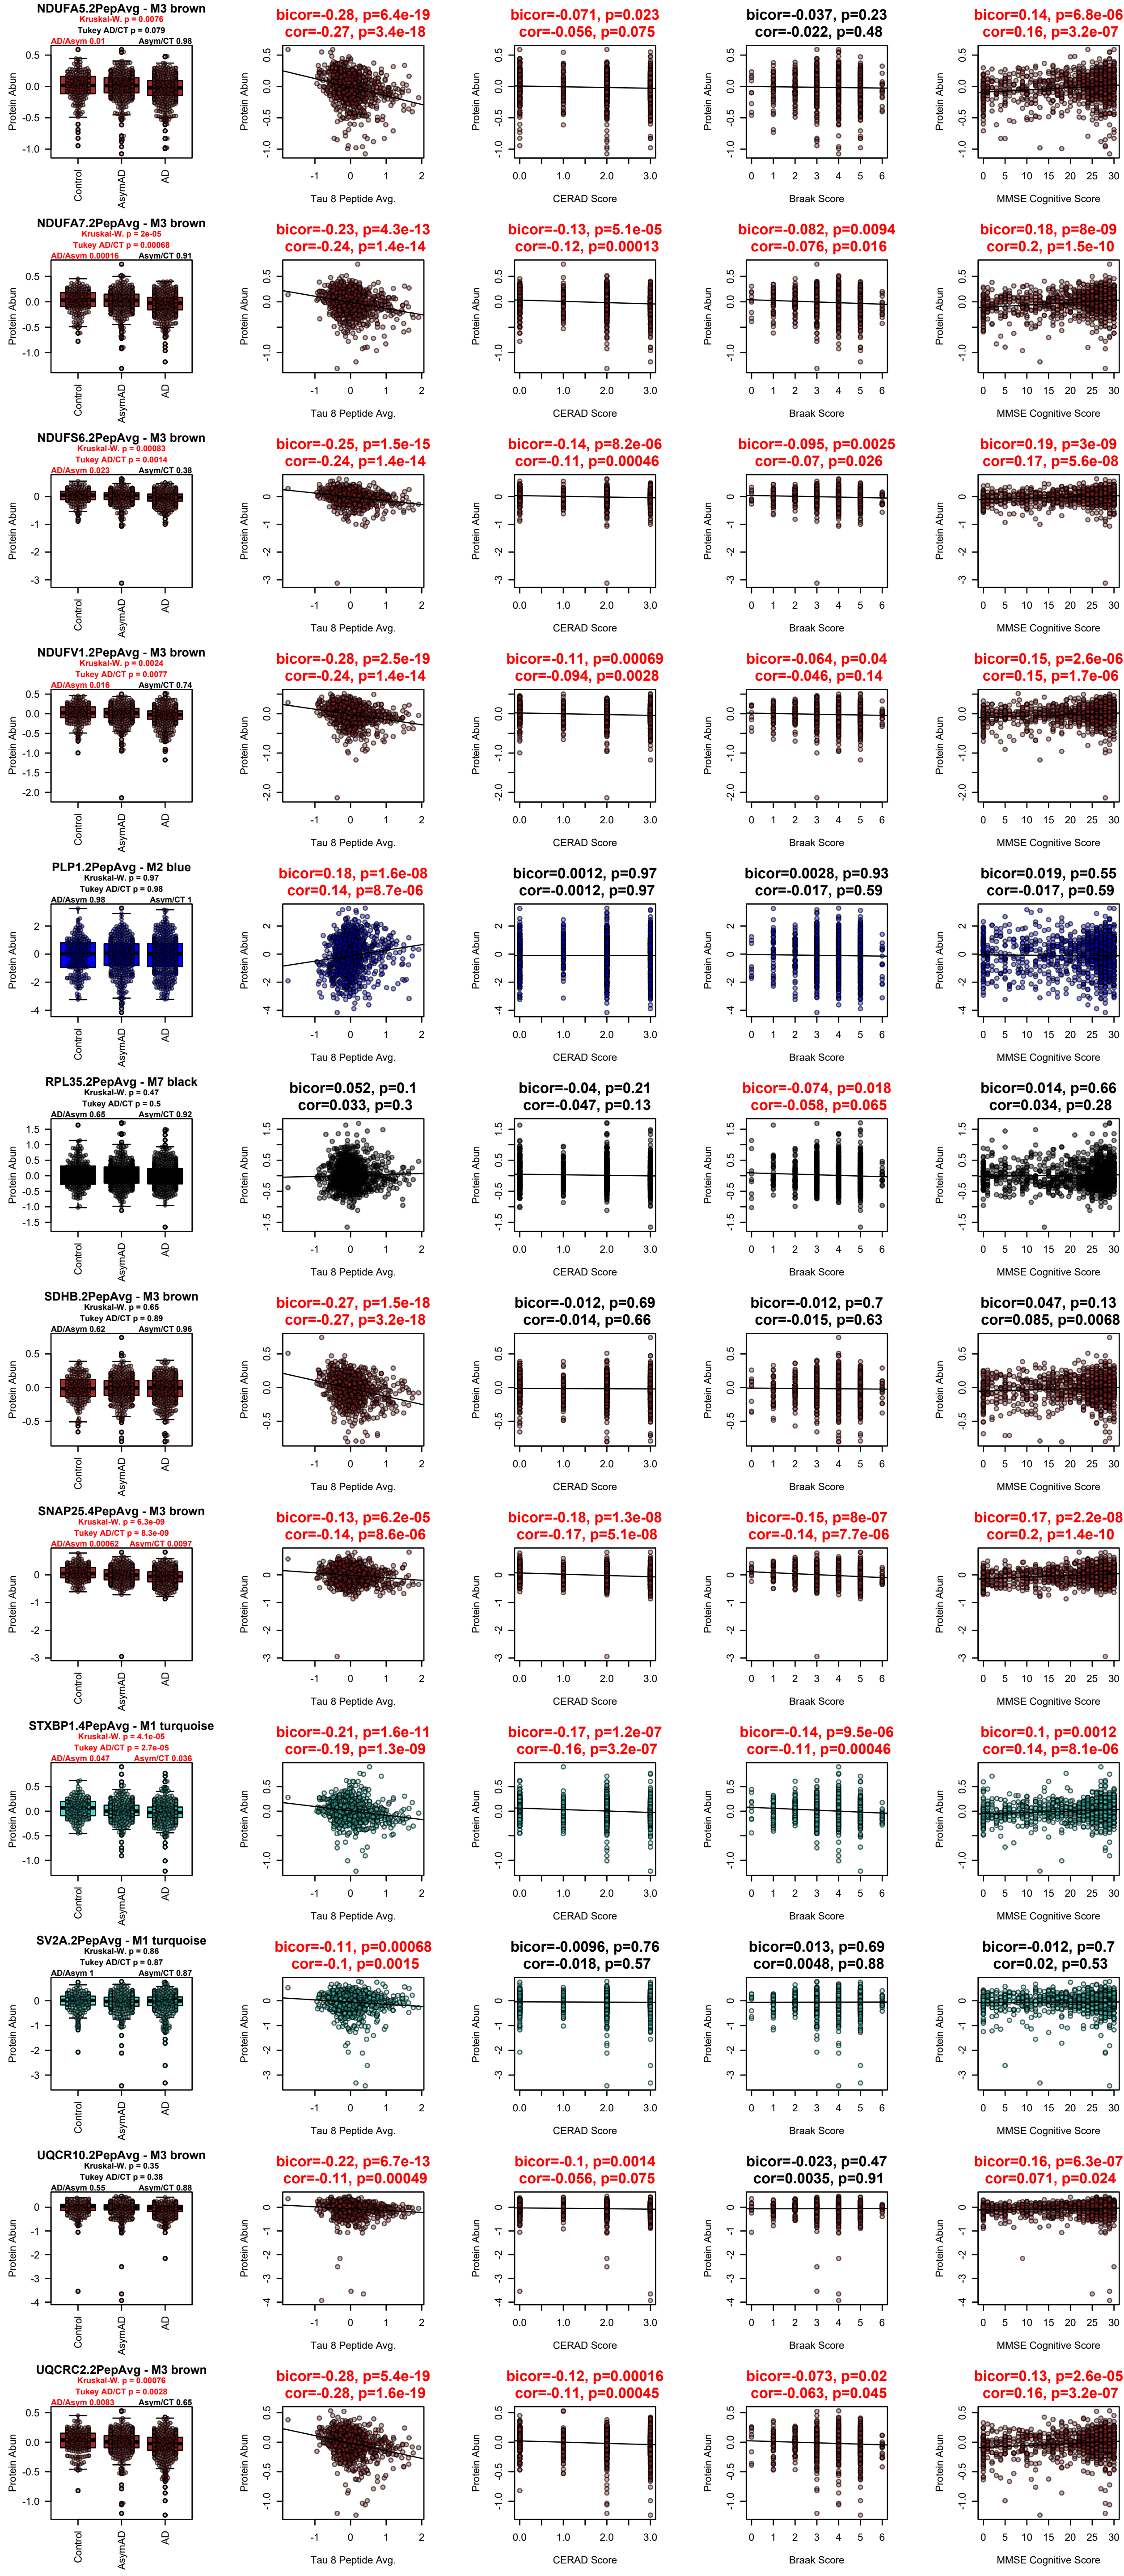

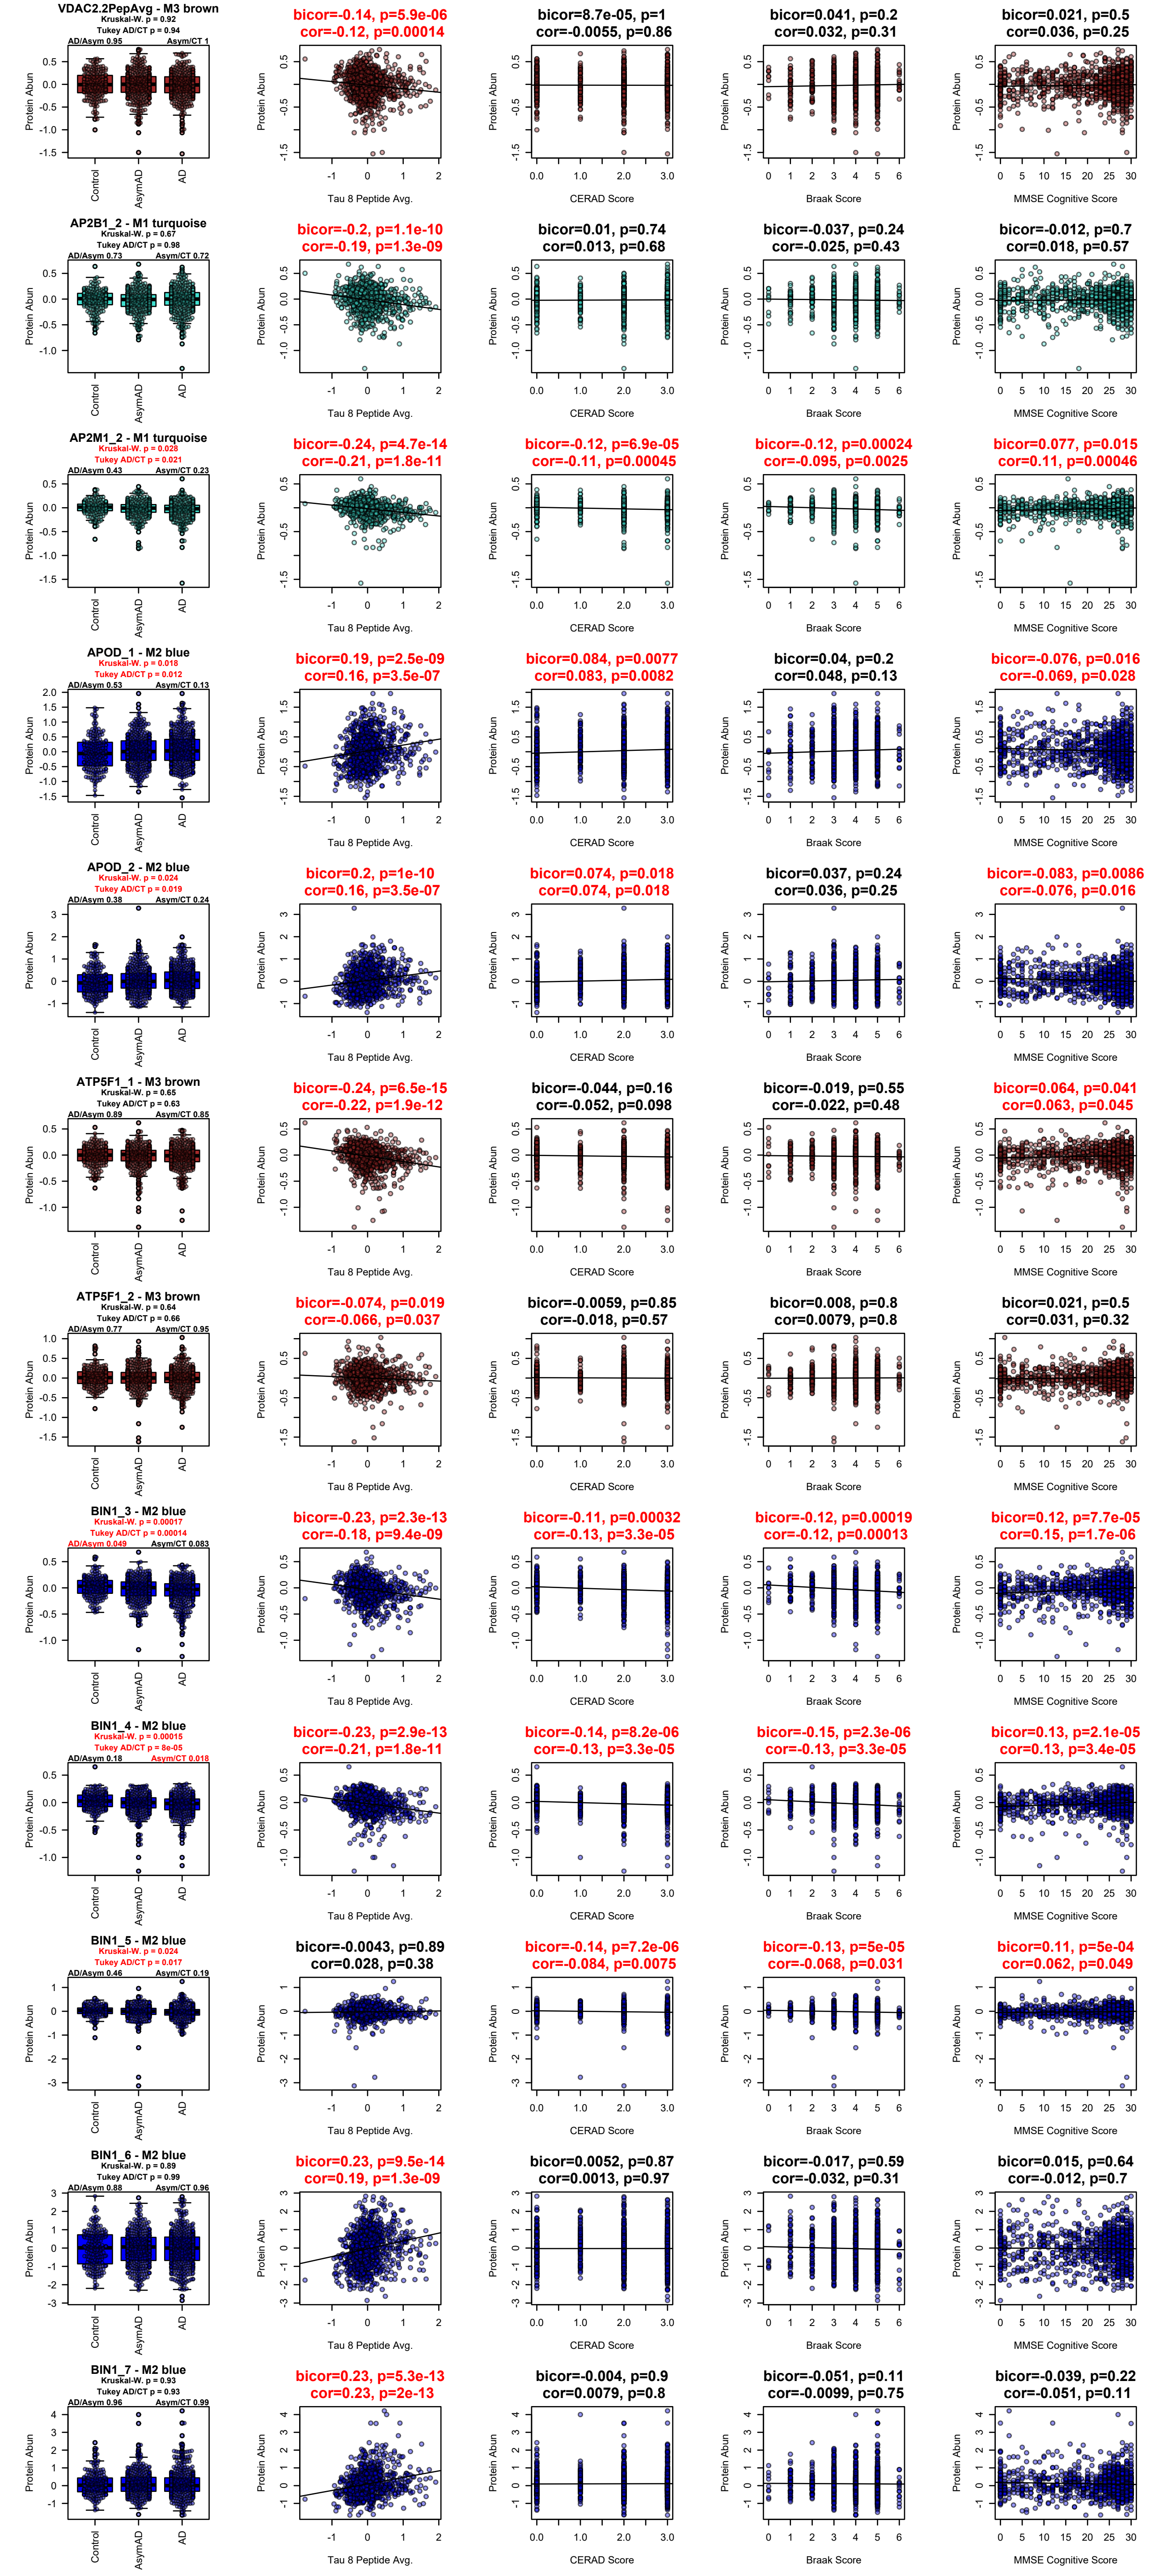



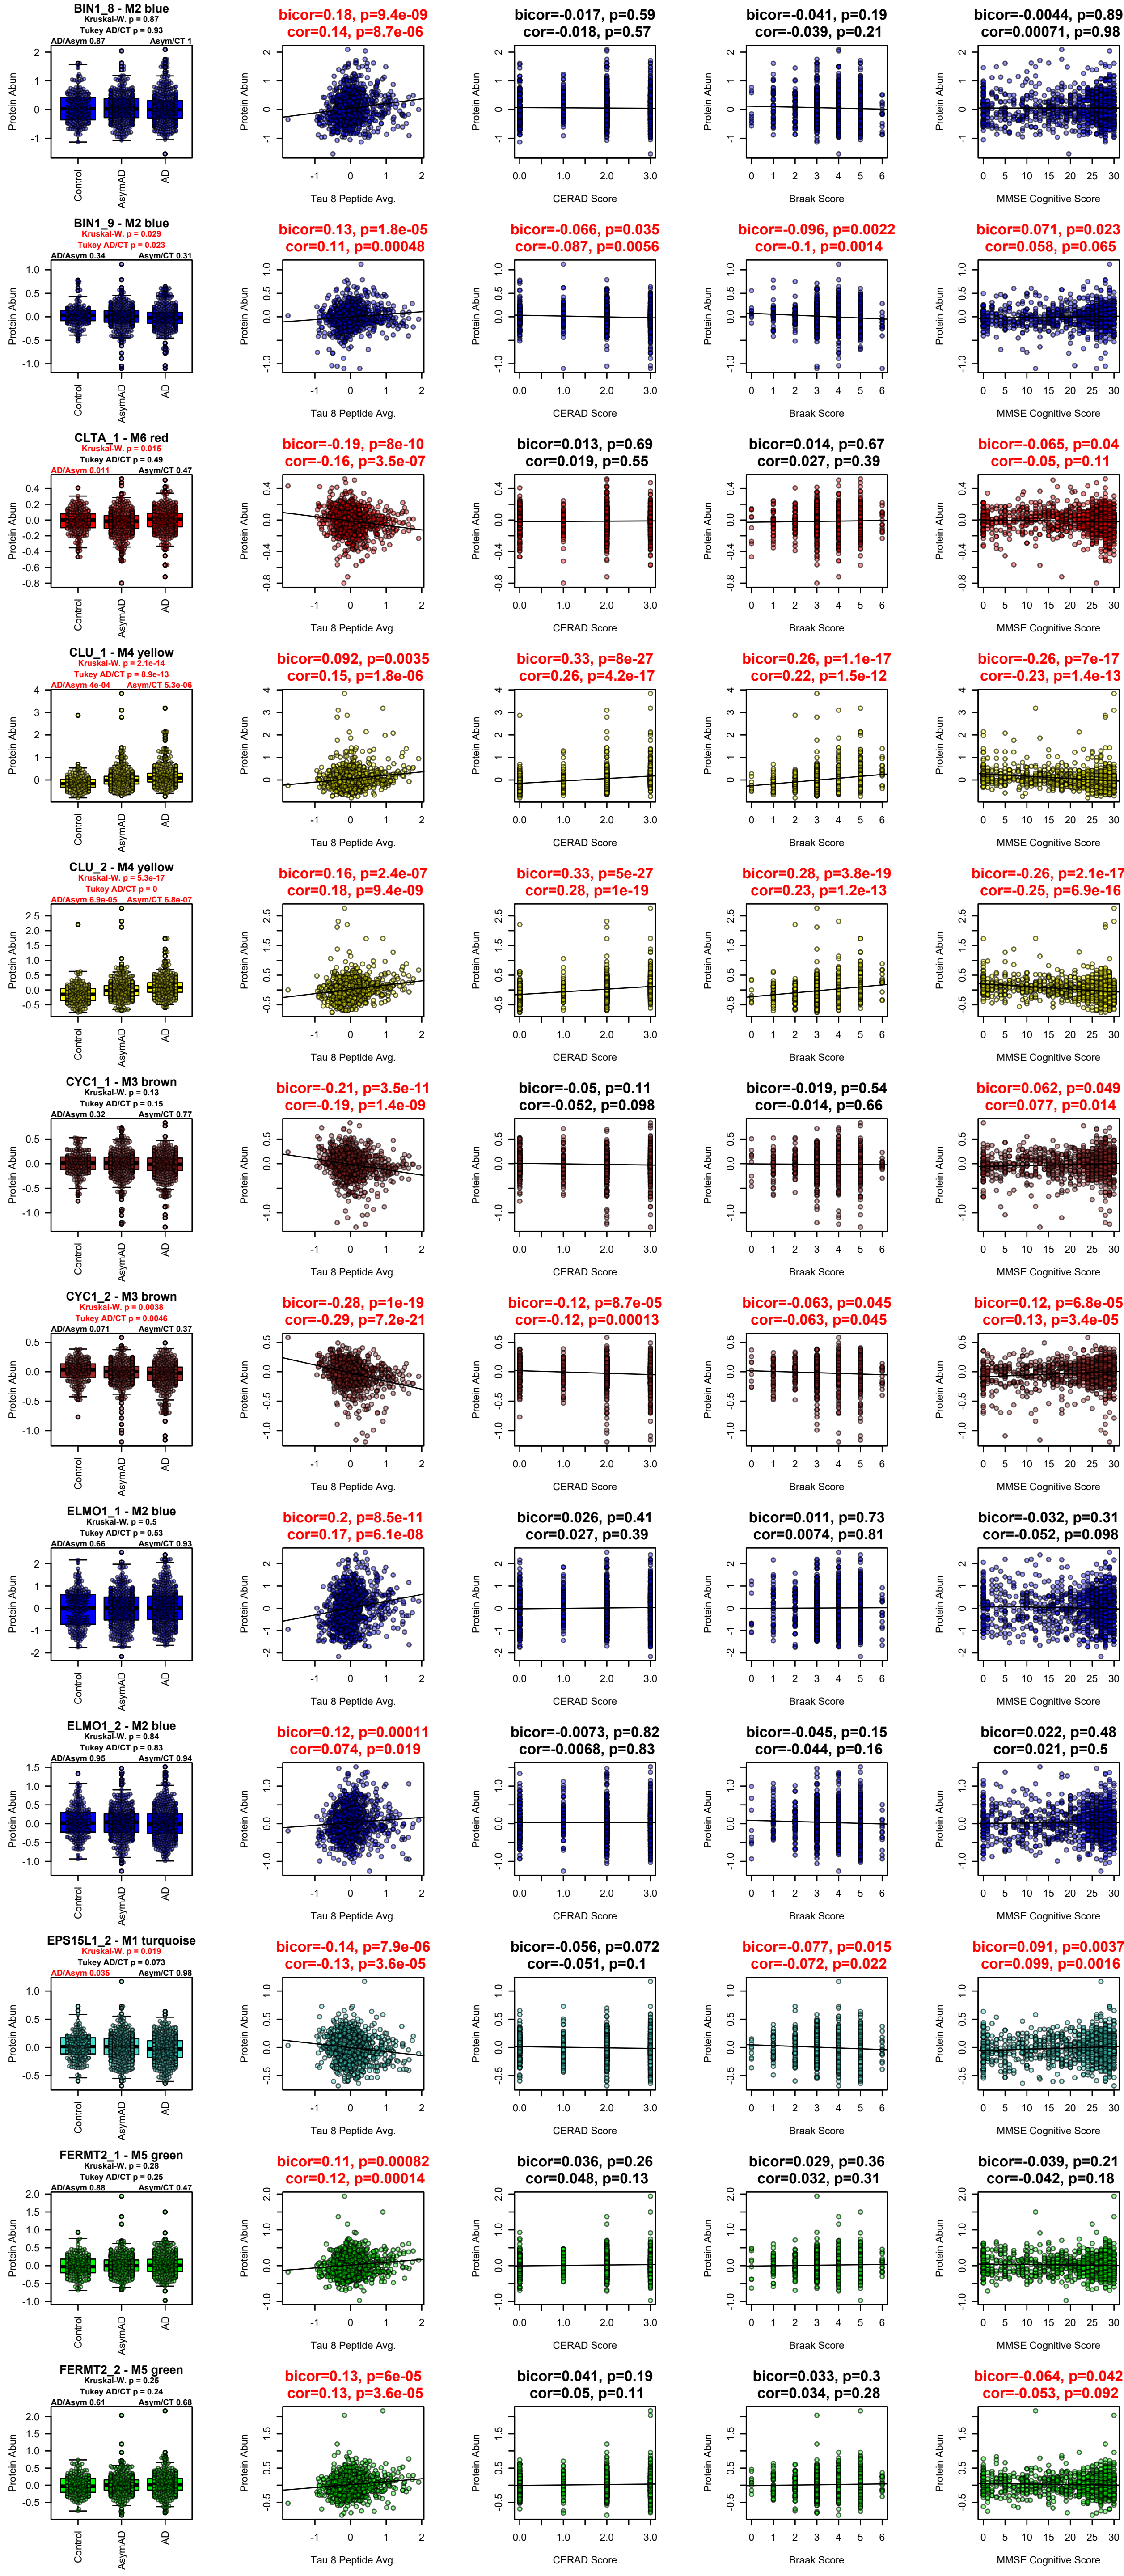

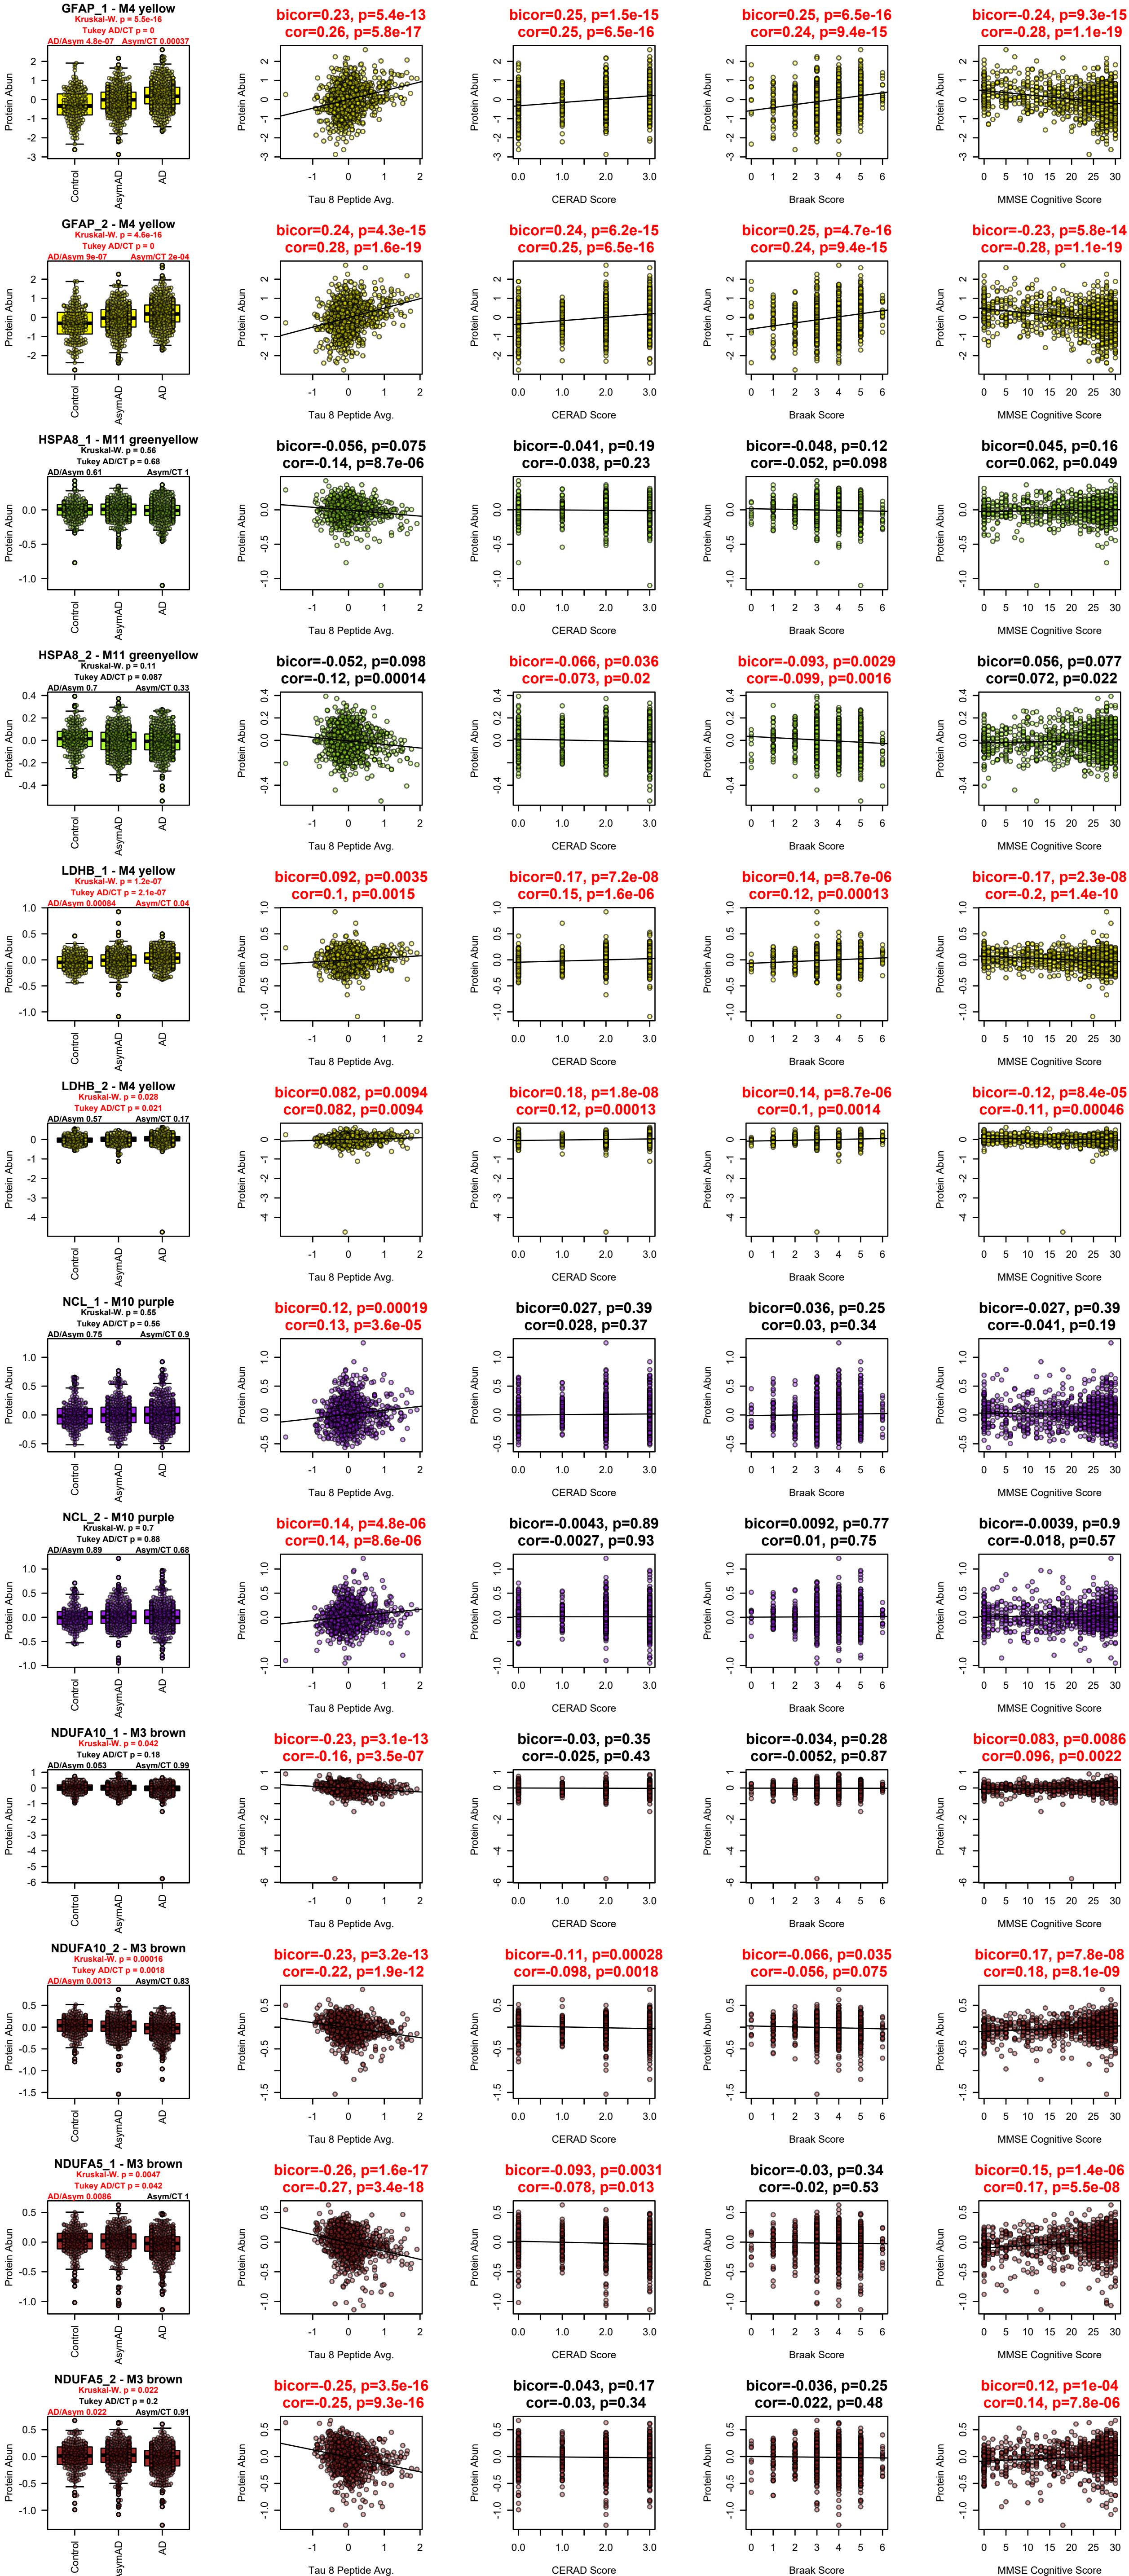

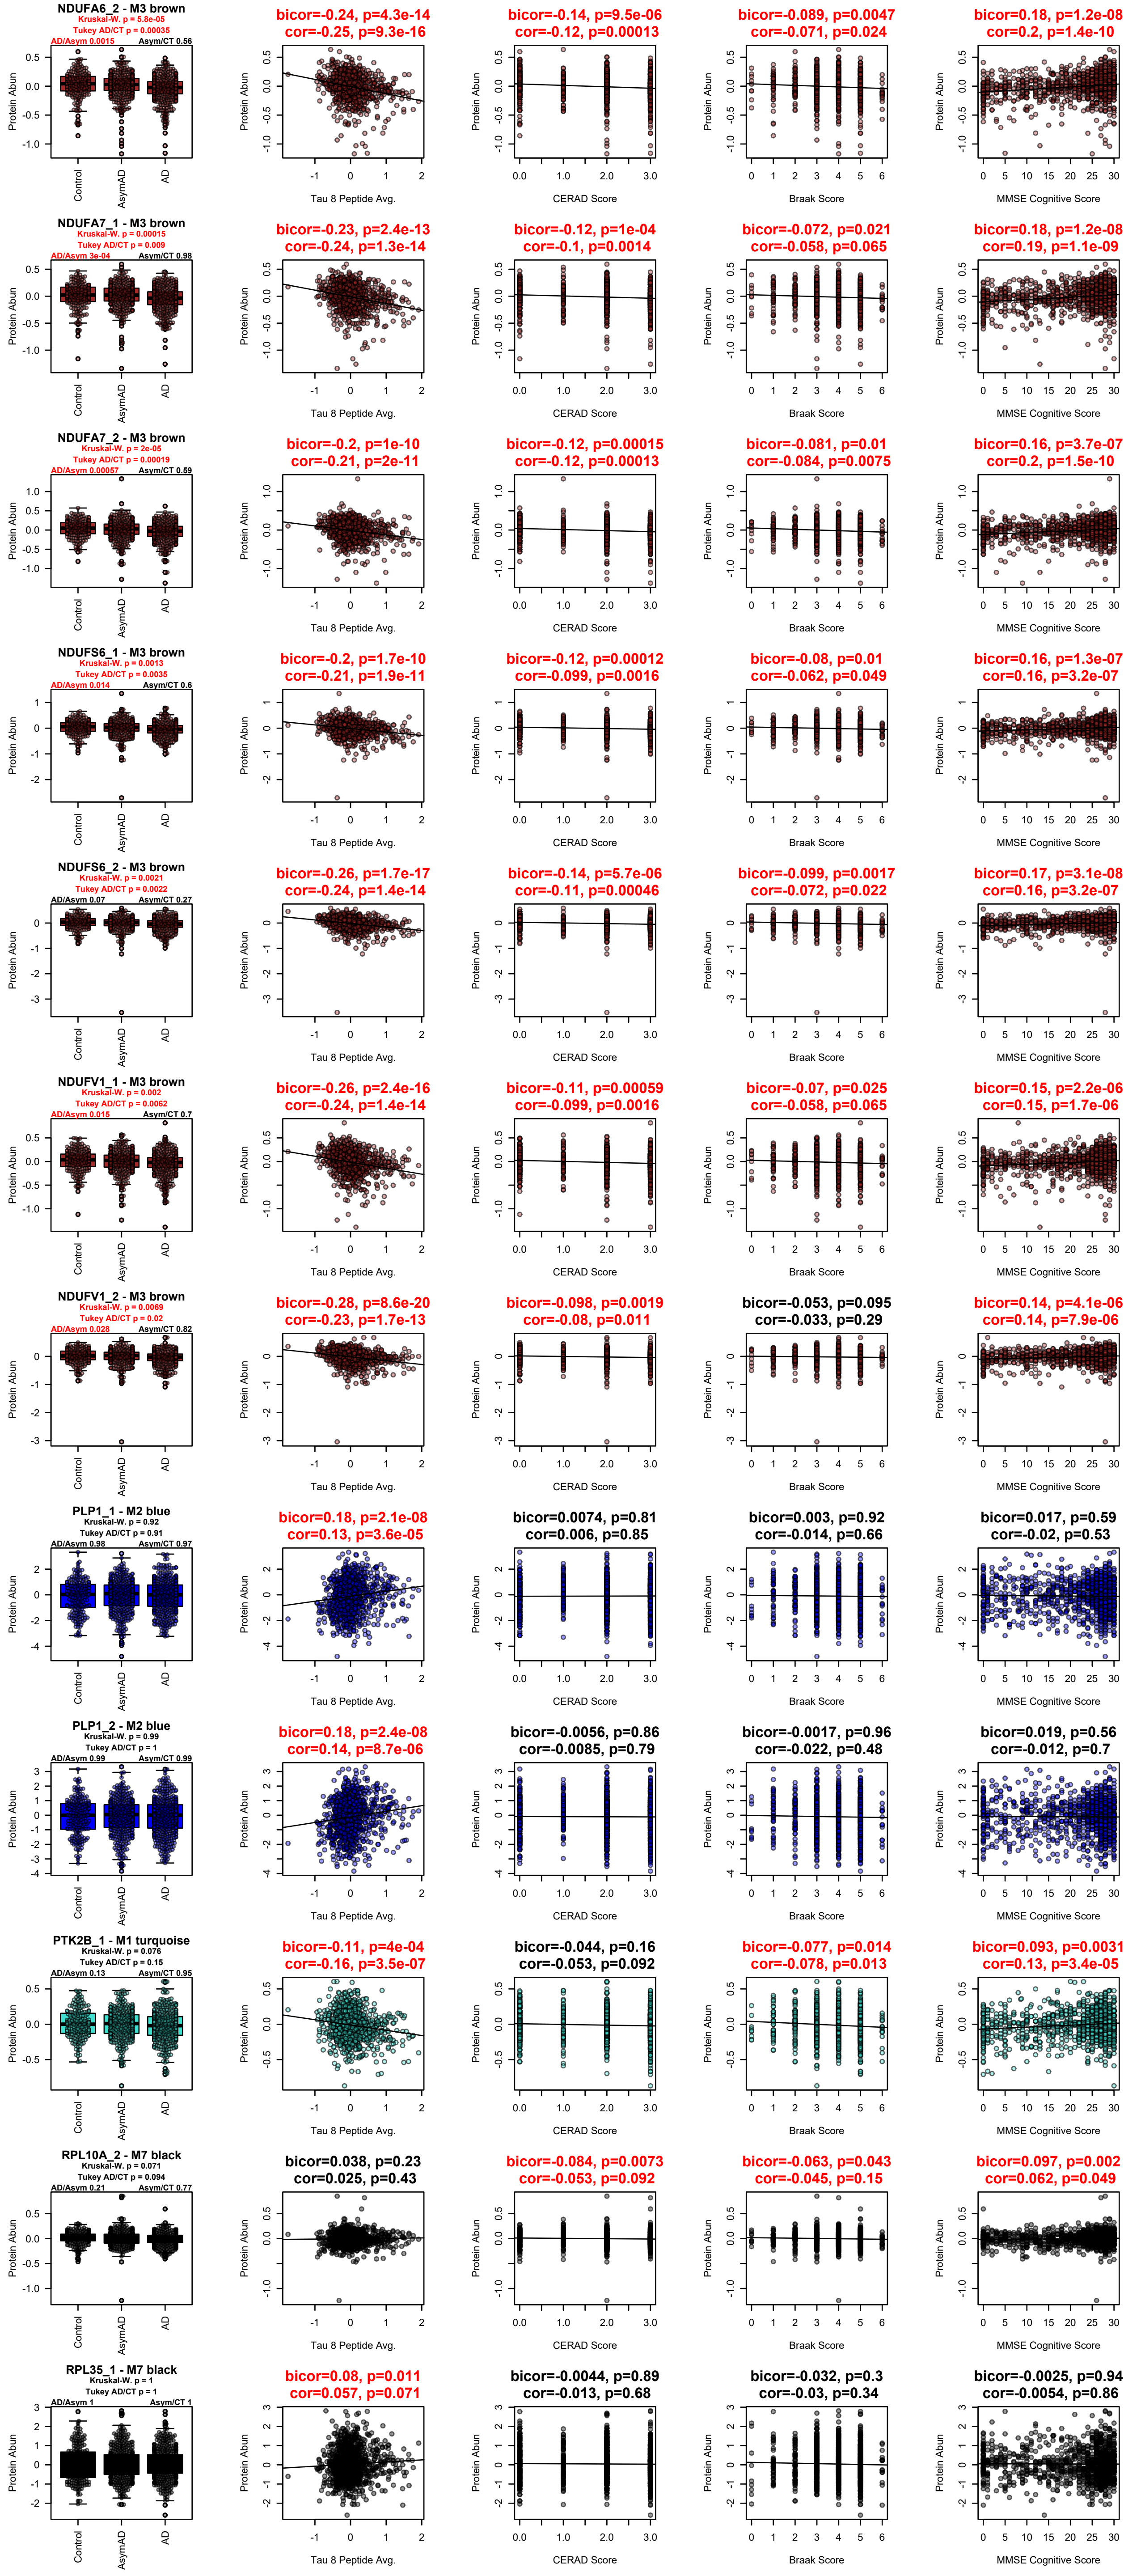

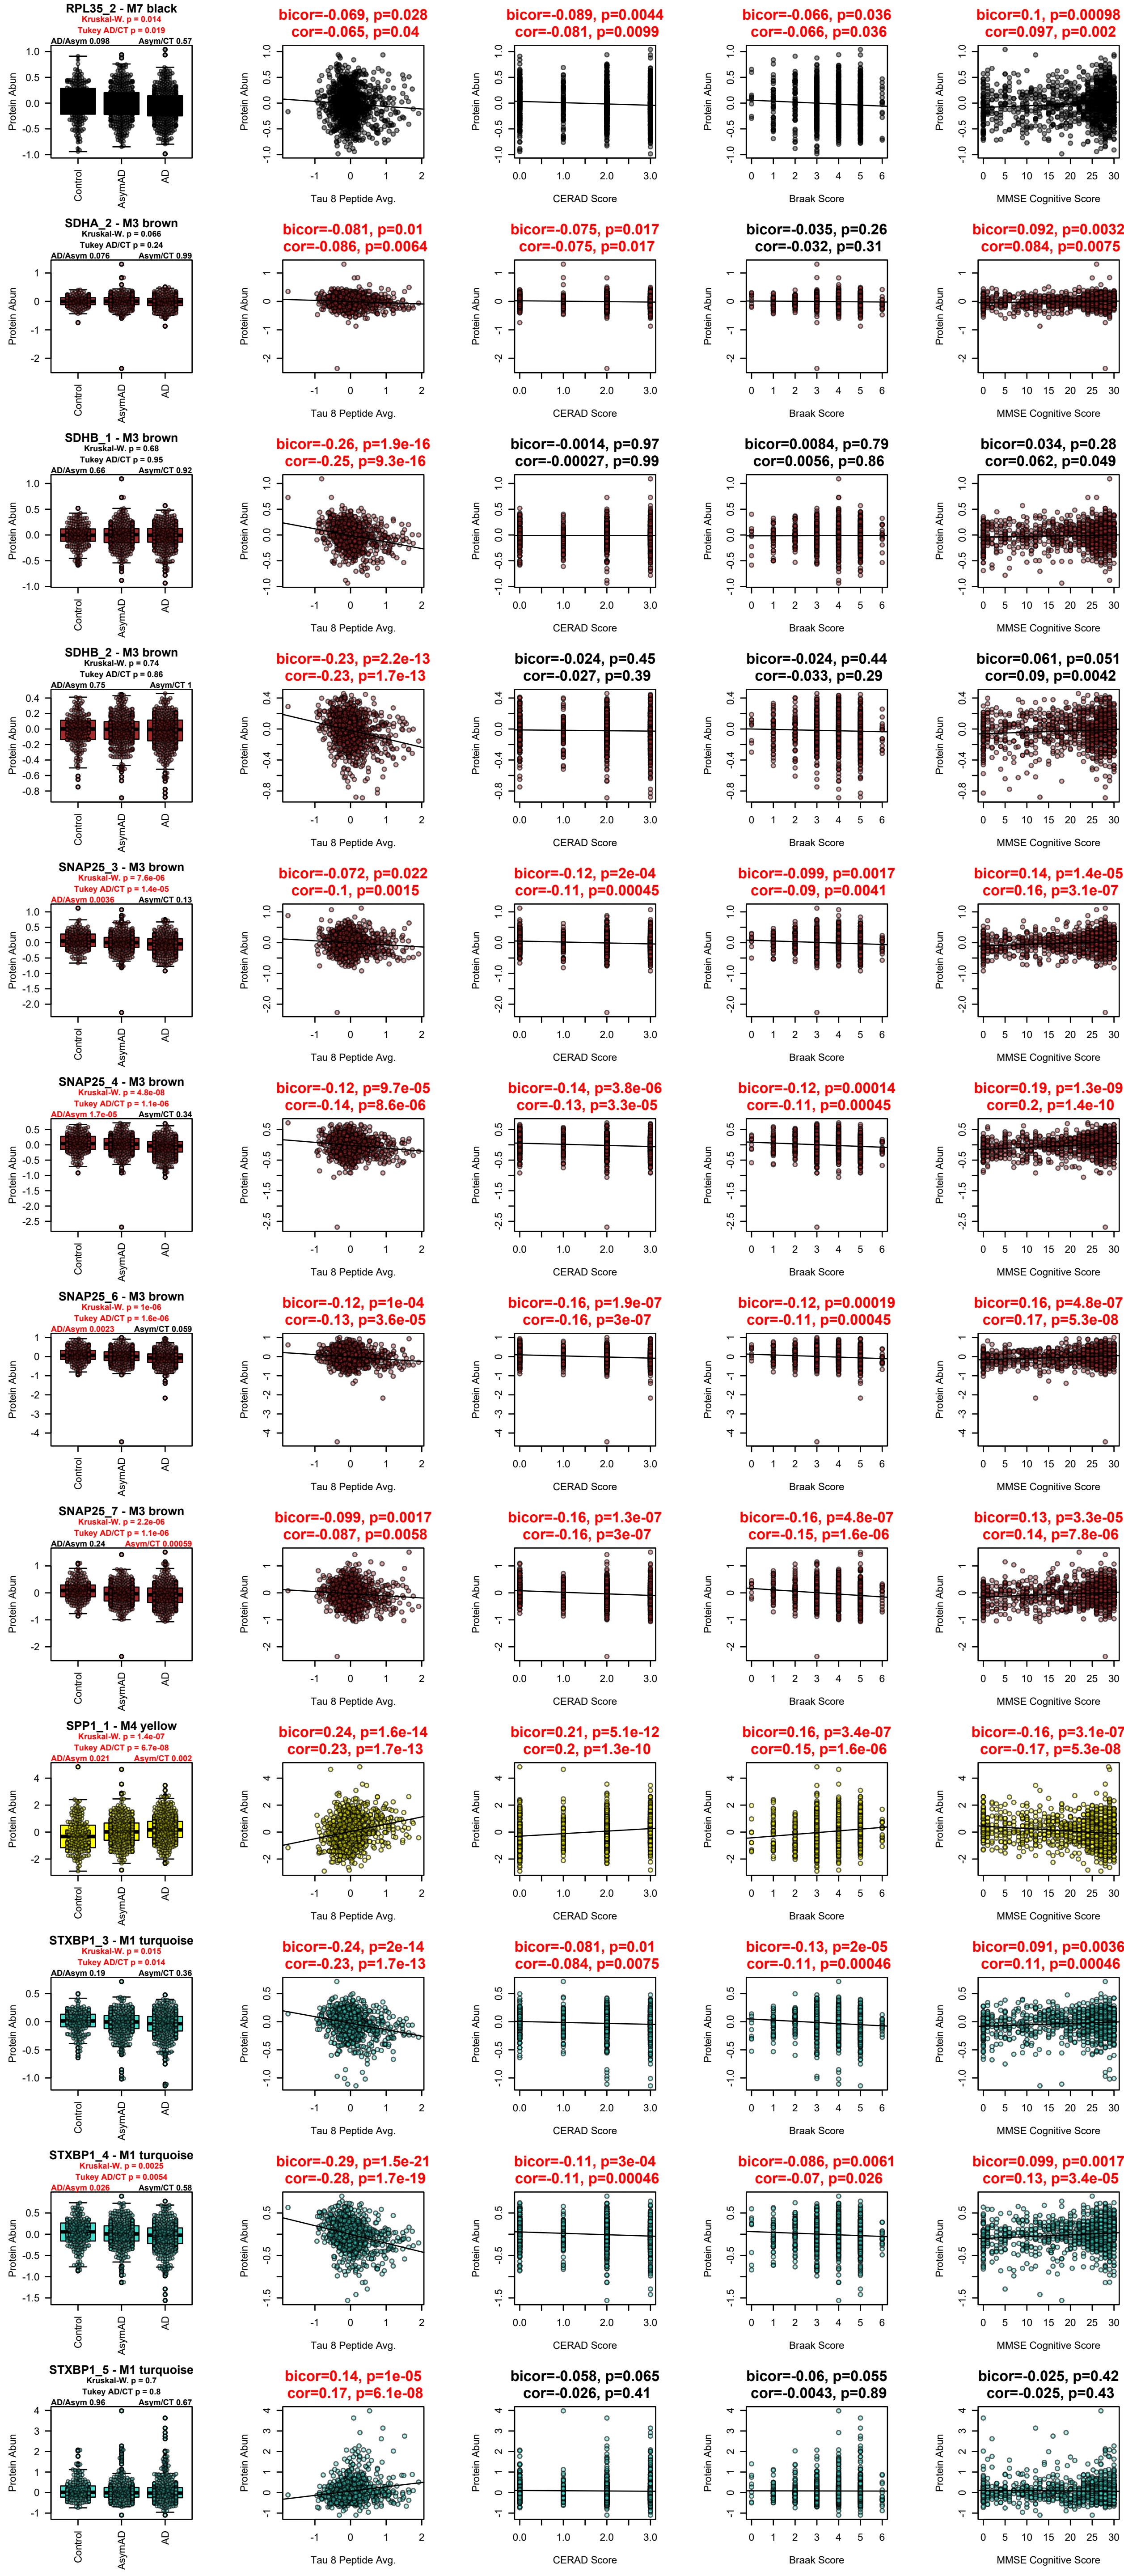

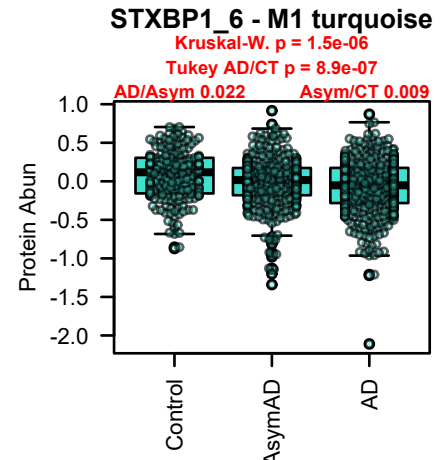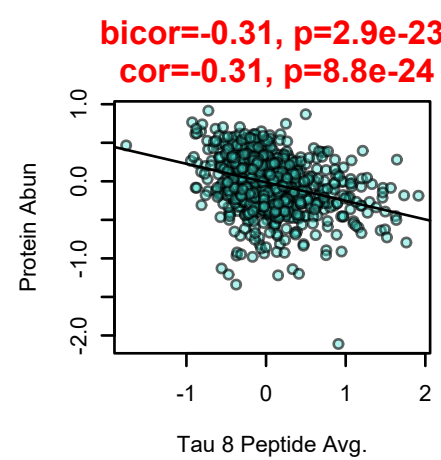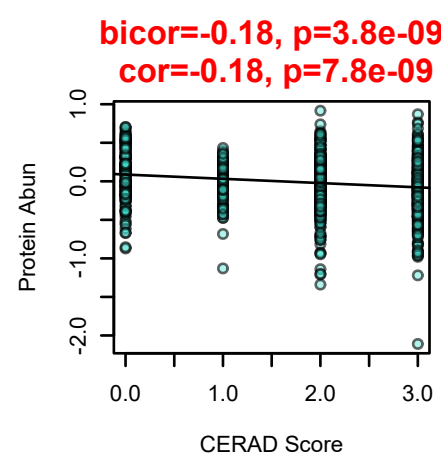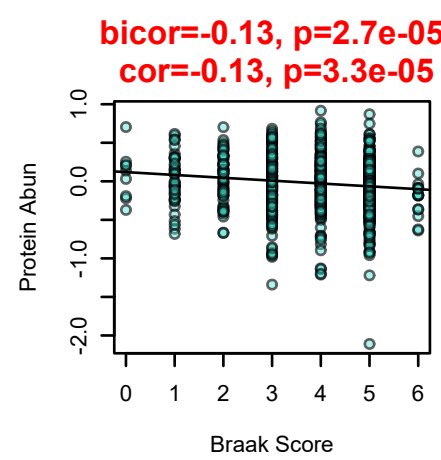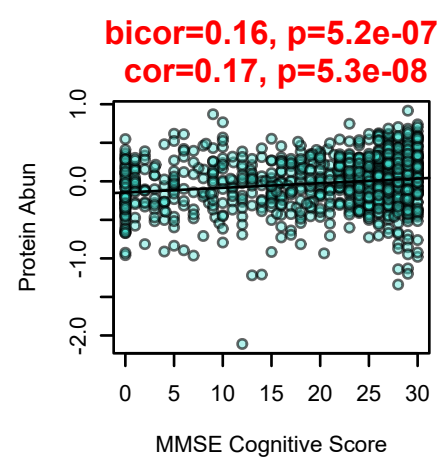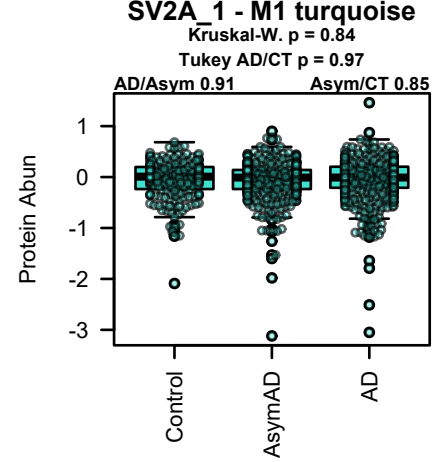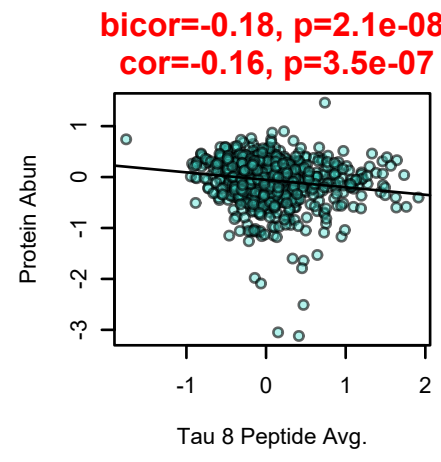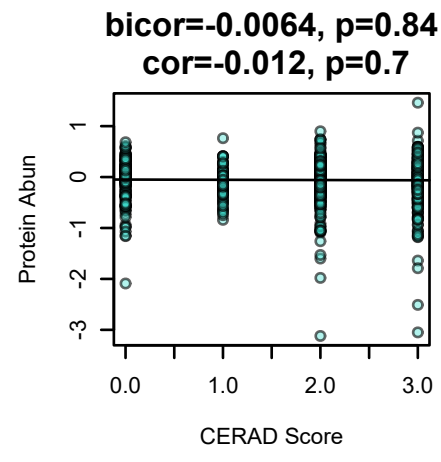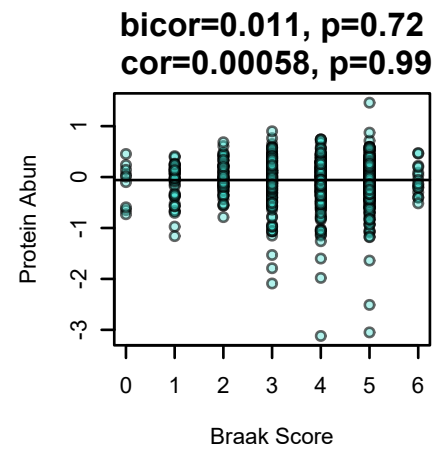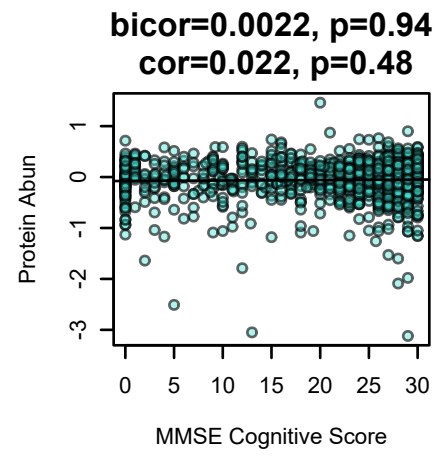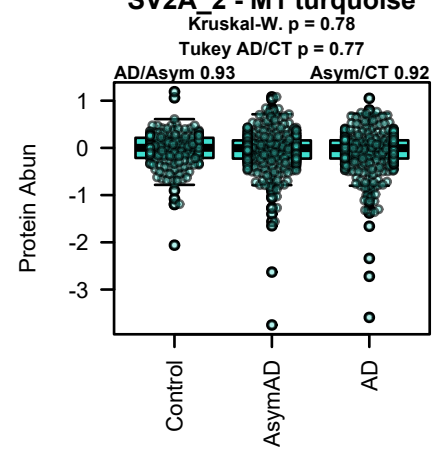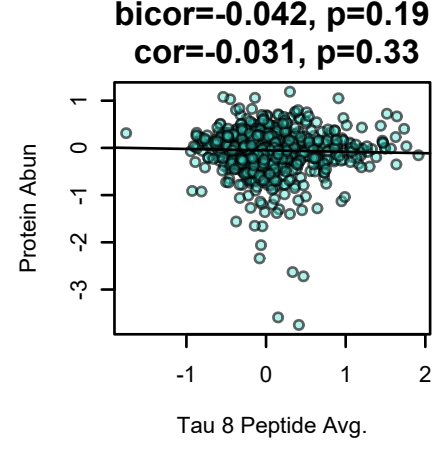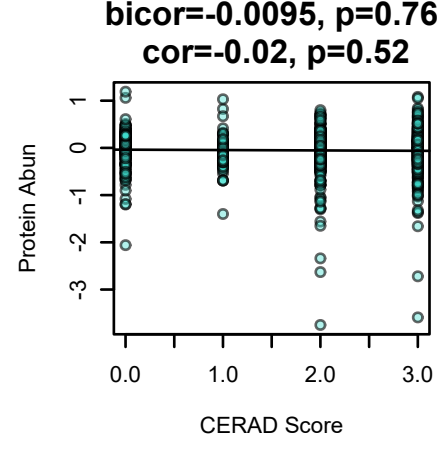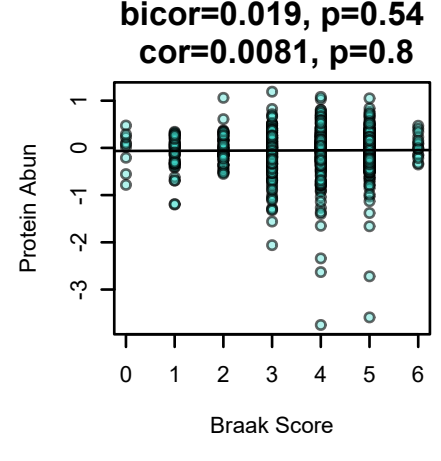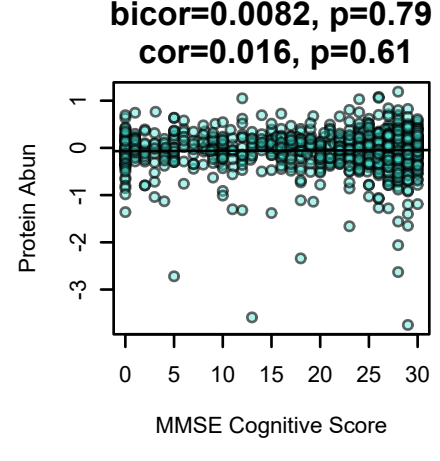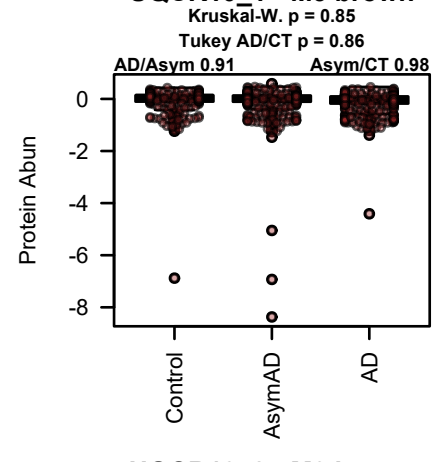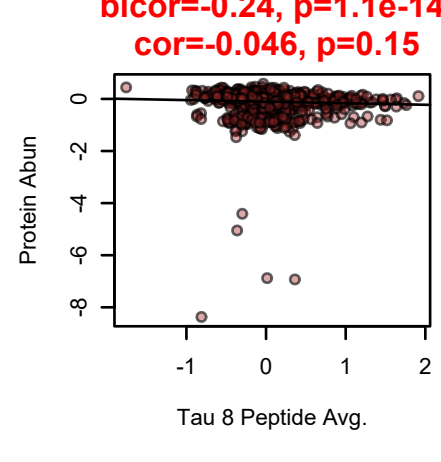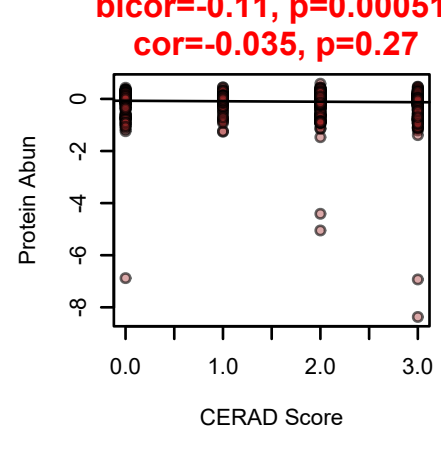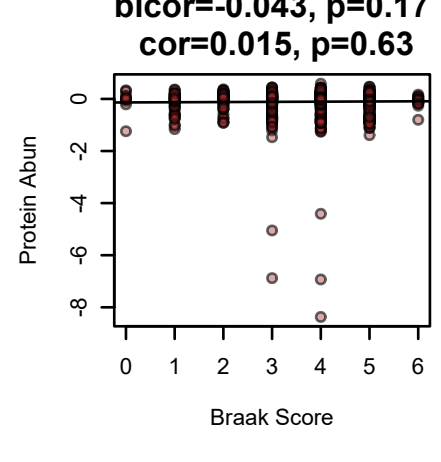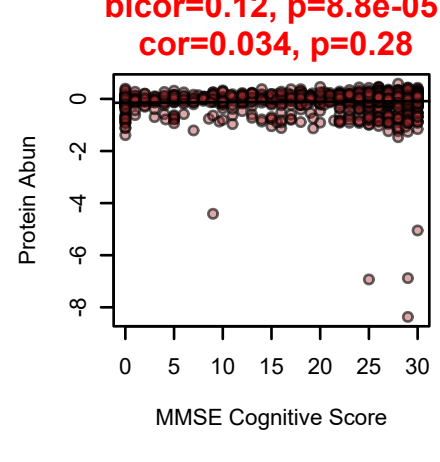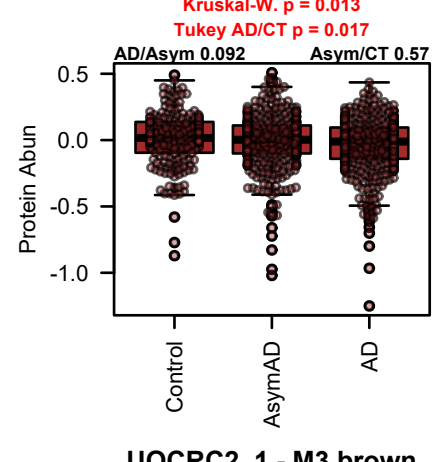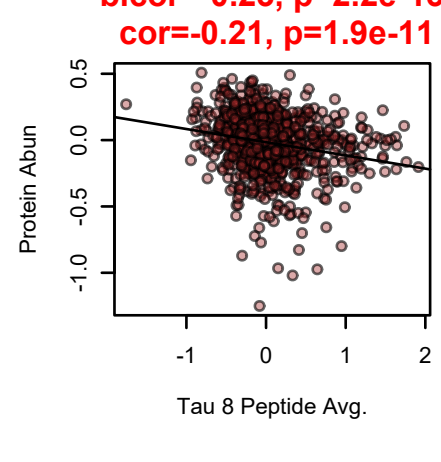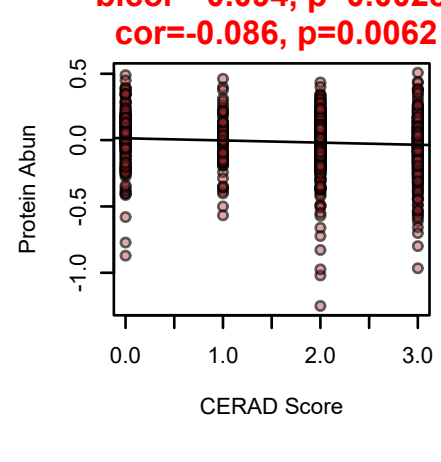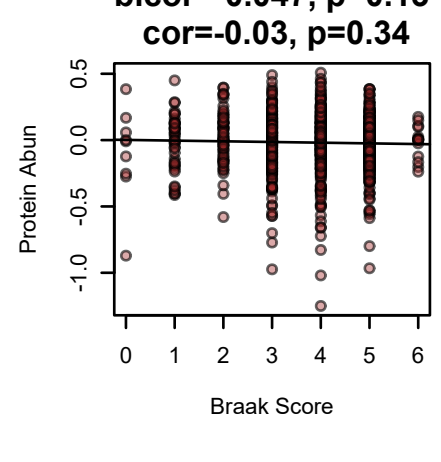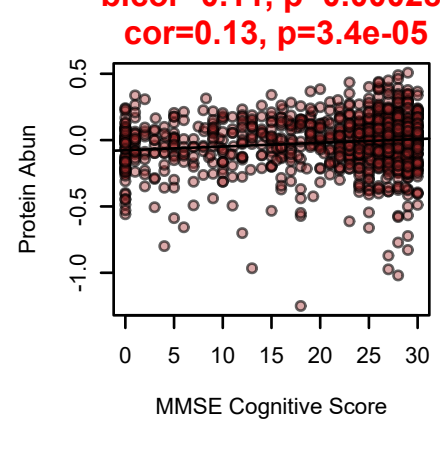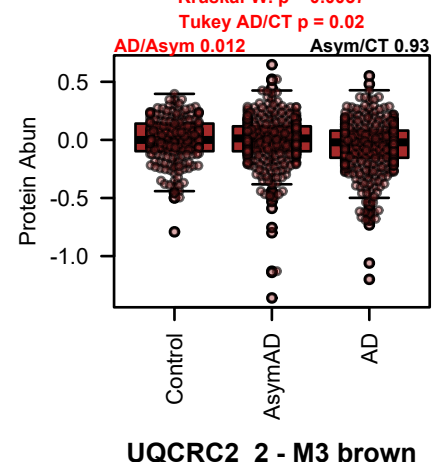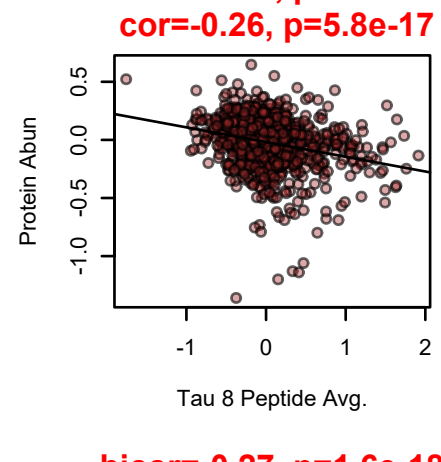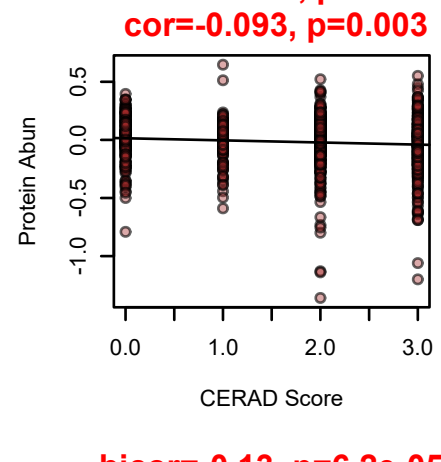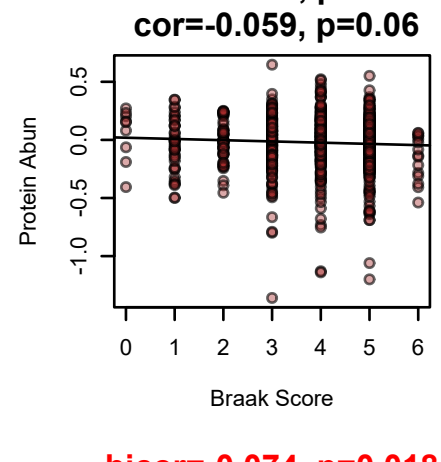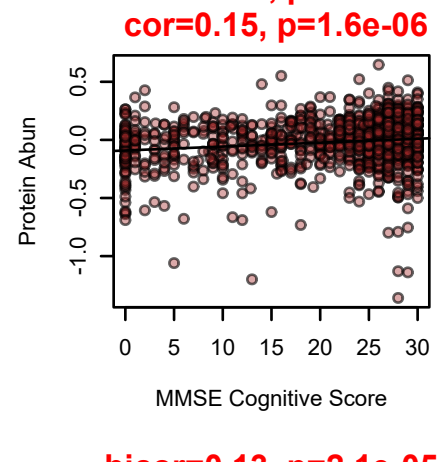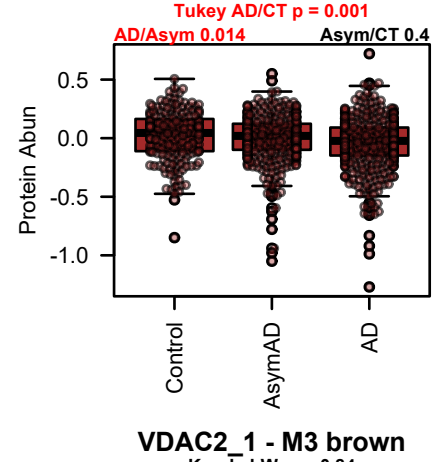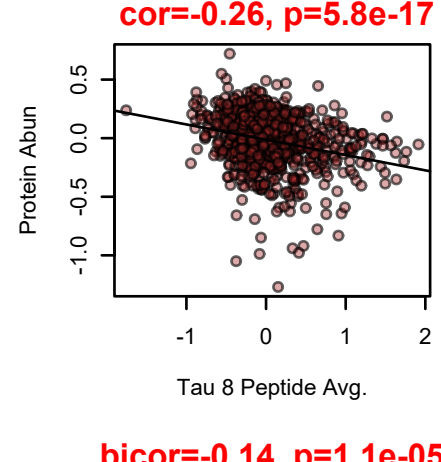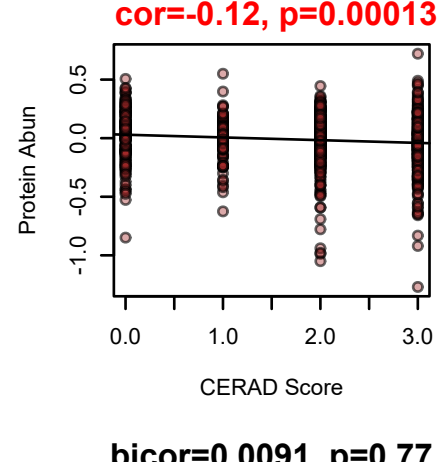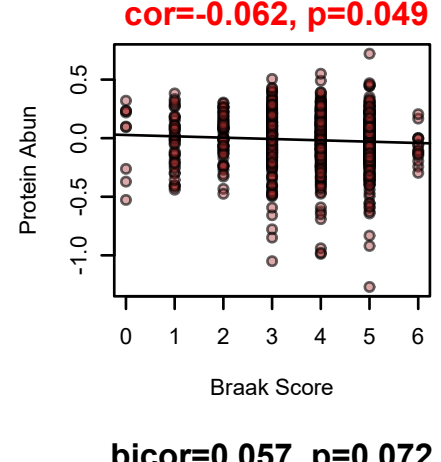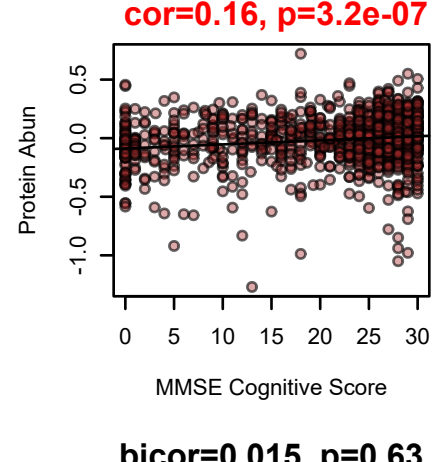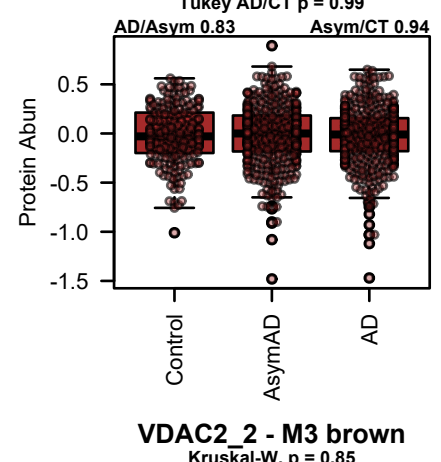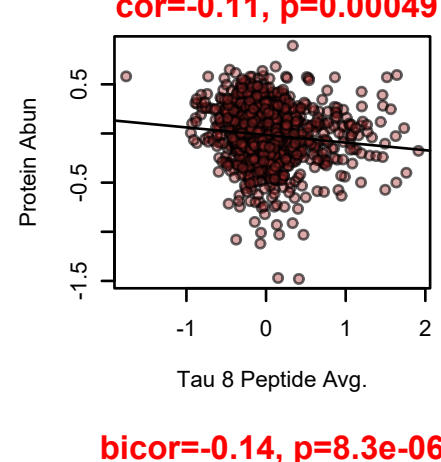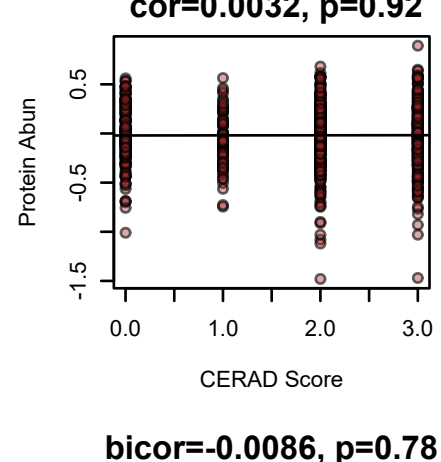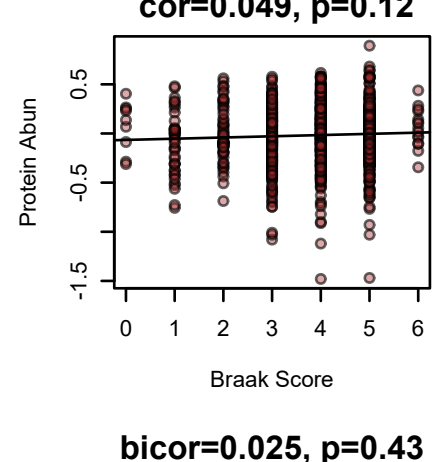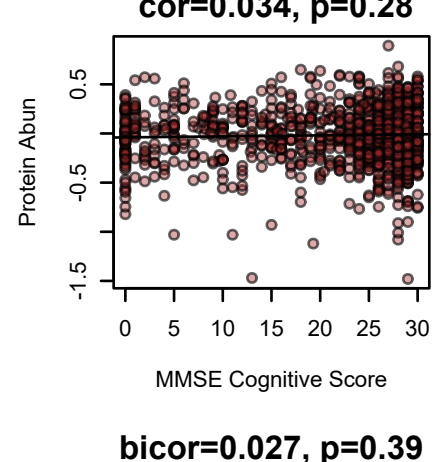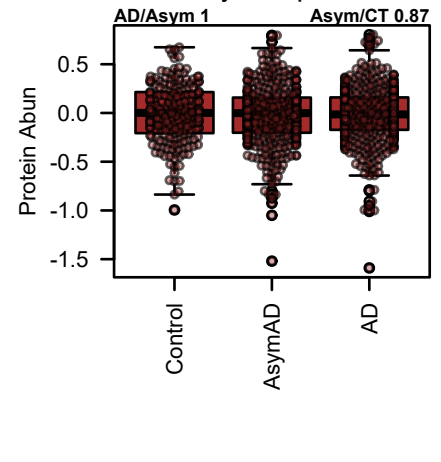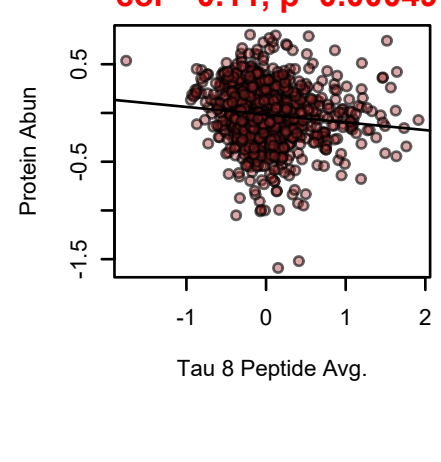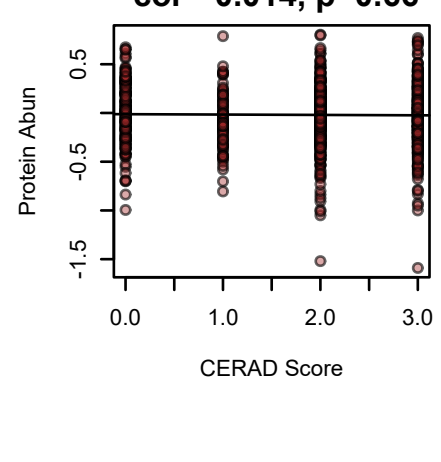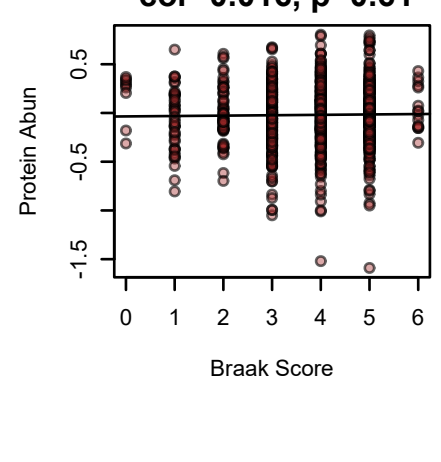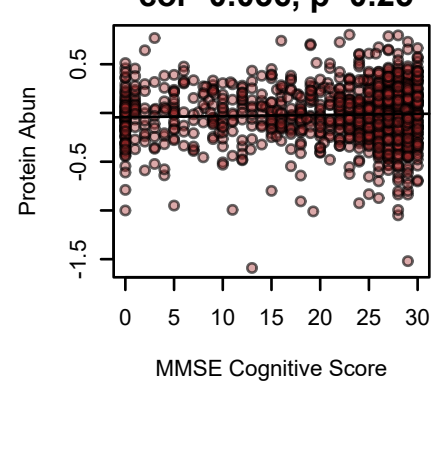

**Supplementary Figure 6. Round 2 Targeted Measurements in ROS/MAP.** Levels of 37 proteins were measured by selected reaction monitoring (SRM) mass spectrometry across 1016 ROS/MAP cases (control,  $n=139$ ; AsymAD,  $n=384$ ; AD,  $n=439$  independent case samples). Most proteins were measured with at least two peptides per protein, and therefore protein level measurements for these proteins are calculated as the average of the individual peptide measurements. Individual peptide measurements are shown after the protein level measurements. Peptide sequences can be found at <https://www.synapse.org/#!/Synapse:syn10468856>. Protein and peptide levels were correlated to tau levels as measured by SRM, CERAD score, Braak stage, and MMSE. Differences in levels by case status were assessed by Kruskal-Wallis (K-W) one-way ANOVA with Tukey test. Correlations were performed using both Pearson correlation (cor) and biweight midcorrelation (bicor), which is more robust to outliers. Data for each protein and peptide is colored by the AD network module in which it resides. Statistical significance at  $p < 0.05$  is highlighted in red. Boxplots represent the median, 25<sup>th</sup>, and 75<sup>th</sup> percentiles, and whiskers represent measurements to the 5<sup>th</sup> and 95<sup>th</sup> percentiles.

**M5 green.Consensus**

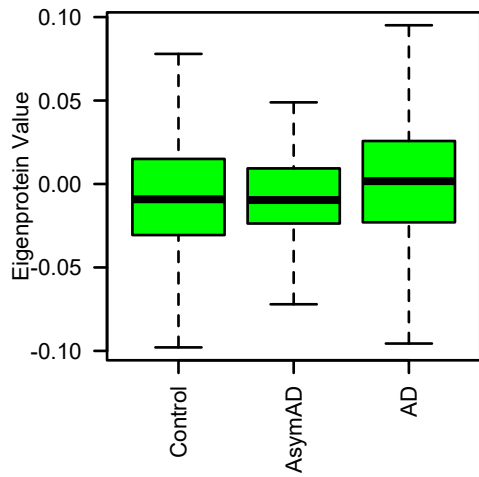

**M5 green.MayoTC (Synthetic)**  
K-W ANOVA p: 0.11

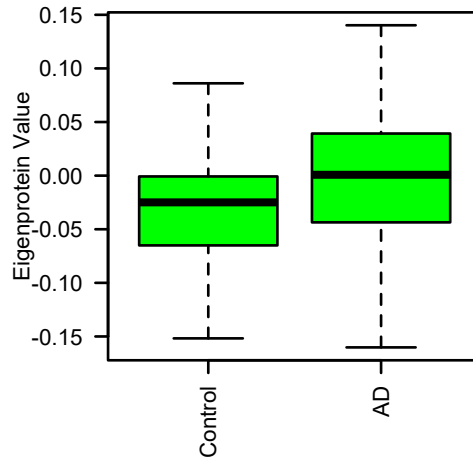

**bicor=0.26, p=0.0079**  
**cor=0.22, p=0.023**

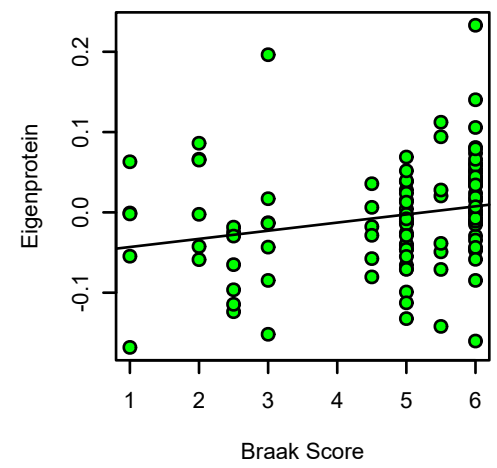

**M8 pink.Consensus**

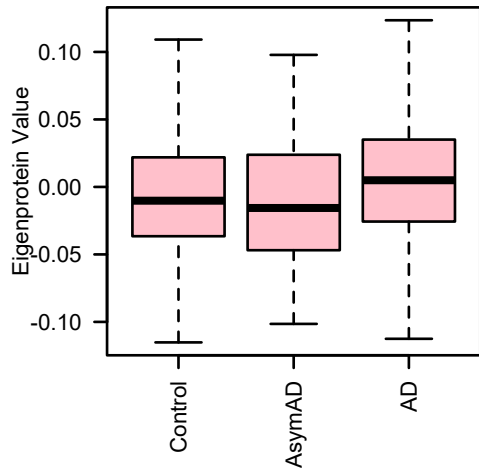

**M8 pink.MayoTC (Synthetic)**  
K-W ANOVA p: 0.15

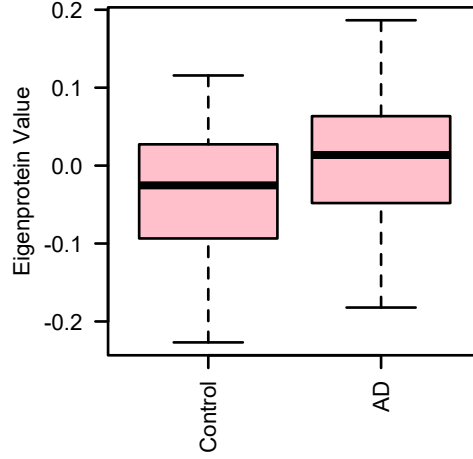

**bicor=0.23, p=0.016**  
**cor=0.2, p=0.039**

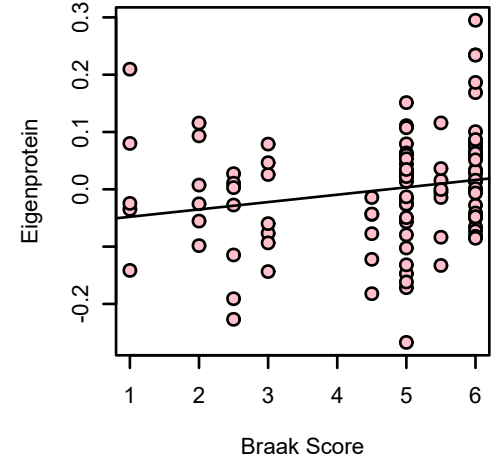

**M10 purple.Consensus**

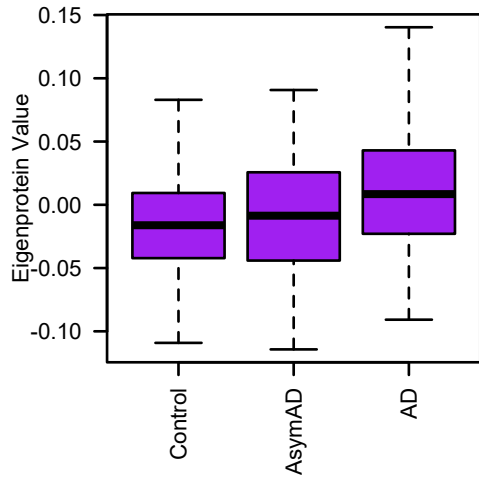

**M10 purple.MayoTC (Synthetic)**  
K-W ANOVA p: 0.038

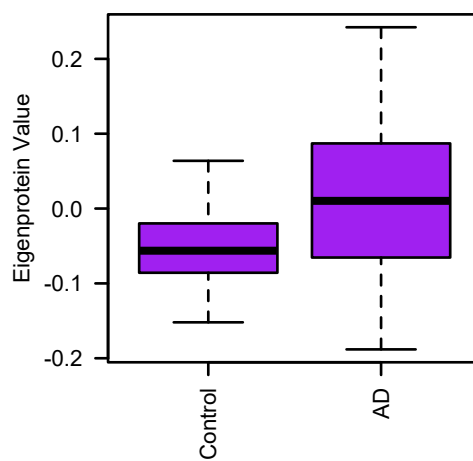

**bicor=0.29, p=0.0028**  
**cor=0.26, p=0.0068**

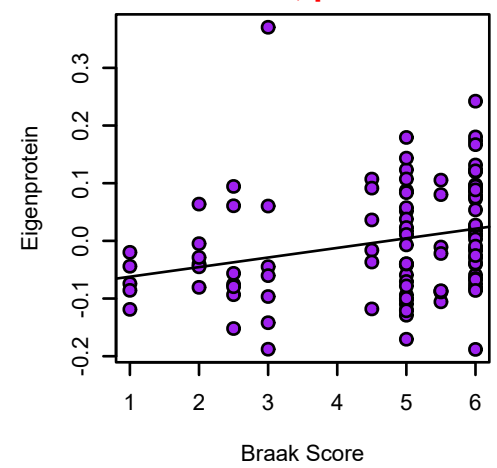

**M2 blue.Consensus**

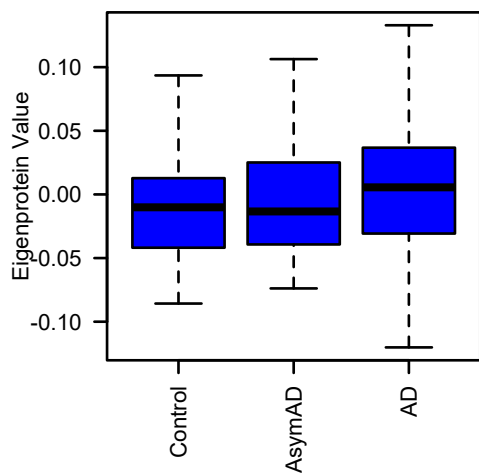

**M2 blue.MayoTC (Synthetic)**  
K-W ANOVA p: 0.44

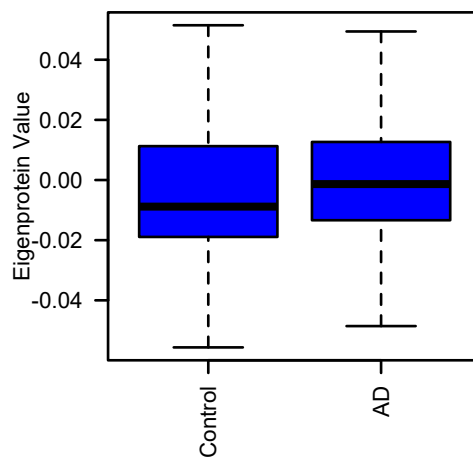

**bicor=0.091, p=0.35**  
**cor=0.11, p=0.26**

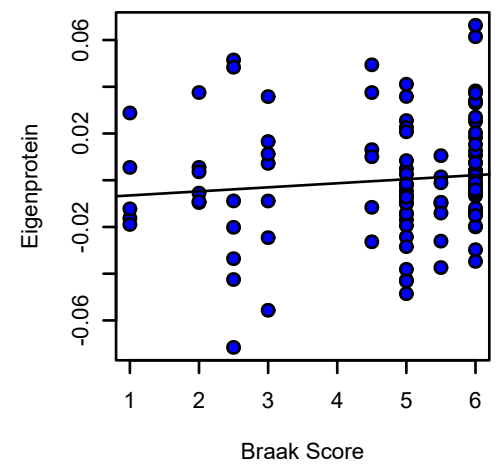

**M4 yellow.Consensus**

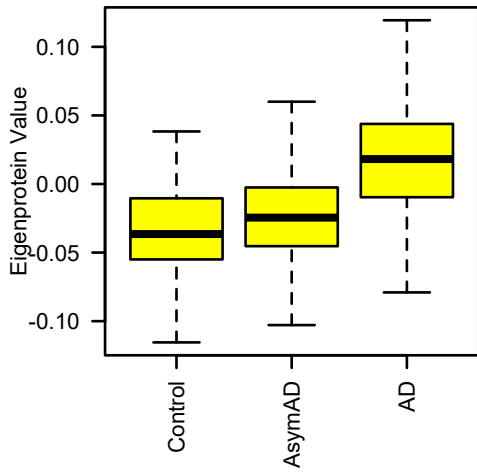

**M4 yellow.MayoTC (Synthetic)**  
K-W ANOVA p: 0.0011

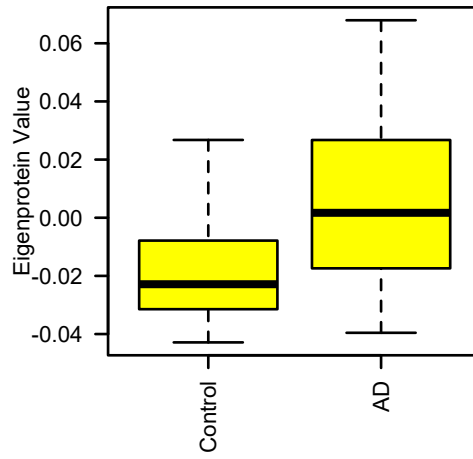

**bicor=0.45, p=1.5e-06**  
**cor=0.39, p=3.3e-05**

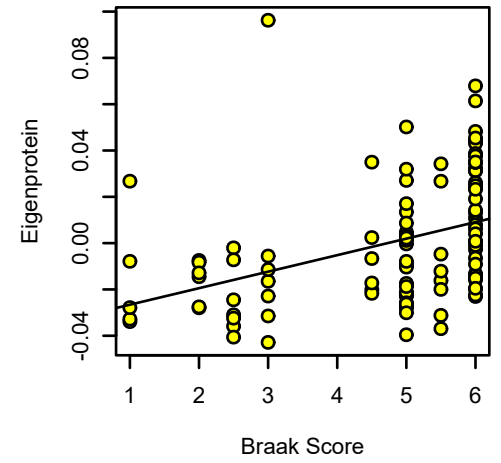

**M11 greenyellow.Consensus**

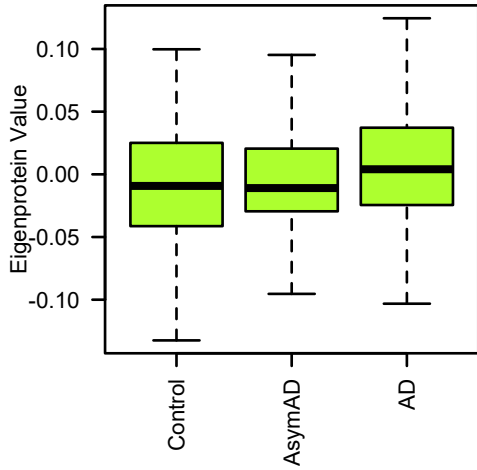

**M11 greenyellow.MayoTC (Synthetic)**  
K-W ANOVA p: 0.51

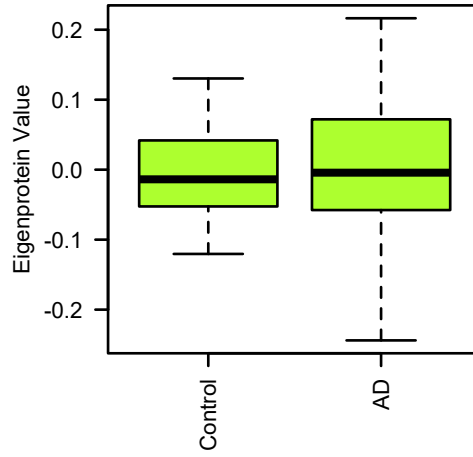

**bicor=0.016, p=0.87**  
**cor=0.039, p=0.69**

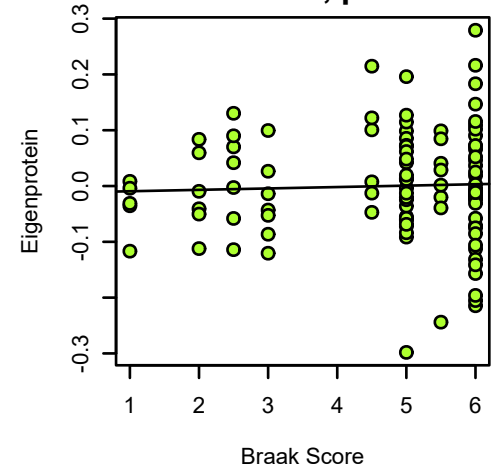

**M13 salmon.Consensus**

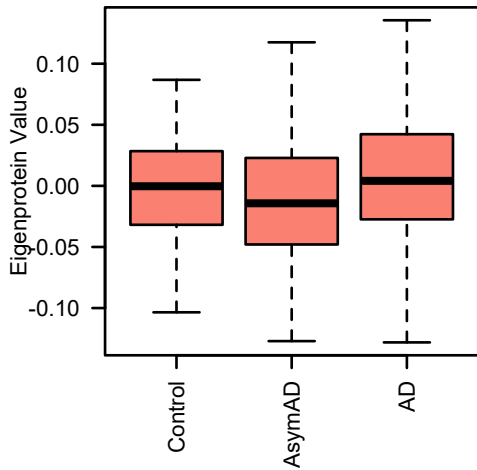

**M13 salmon.MayoTC (Synthetic)**  
K-W ANOVA p: 0.27

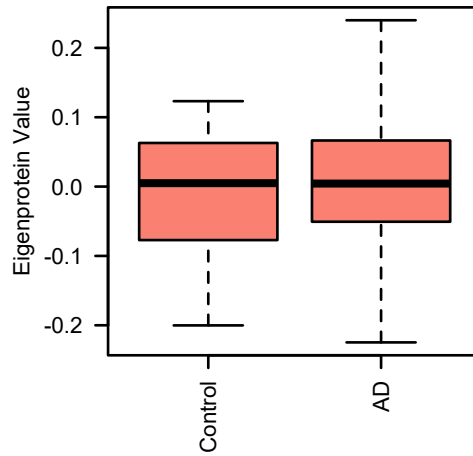

**bicor=0.044, p=0.65**  
**cor=0.065, p=0.51**

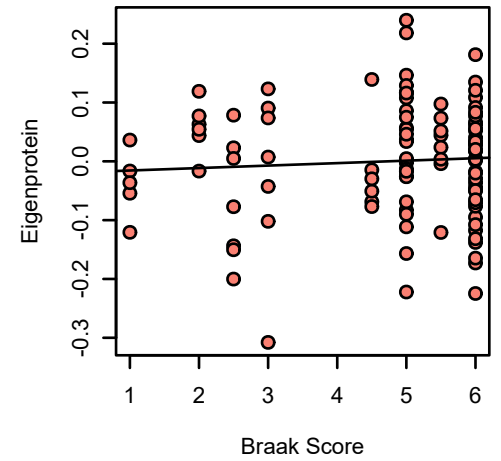

**M3 brown.Consensus**

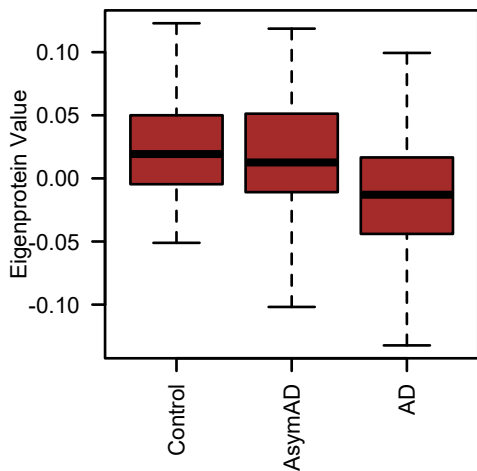

**M3 brown.MayoTC (Synthetic)**  
K-W ANOVA p: 0.0013

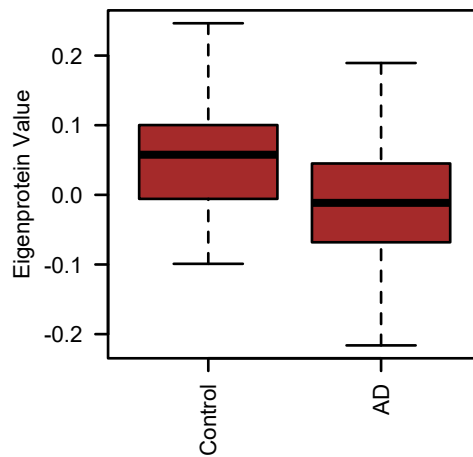

**bicor=-0.39, p=3.4e-05**  
**cor=-0.38, p=5.4e-05**

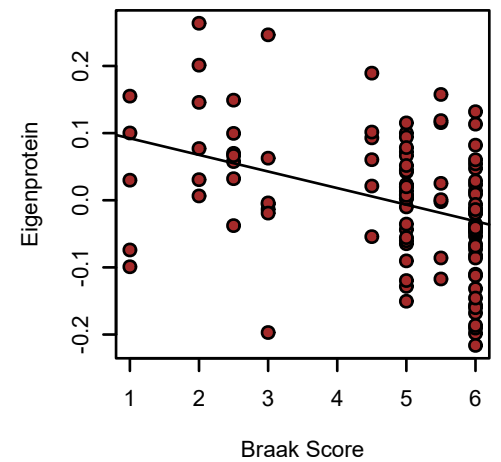



**M6 red.Consensus**

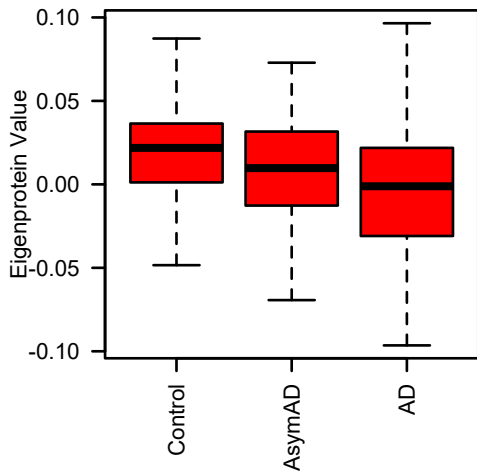

**M6 red.MayoTC (Synthetic)**  
K-W ANOVA p: 0.87

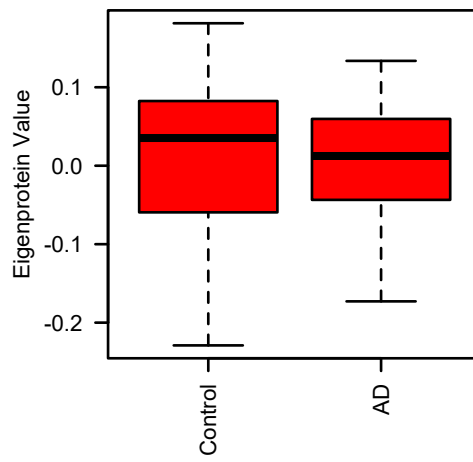

**bicor=-0.13, p=0.17**  
**cor=-0.05, p=0.61**

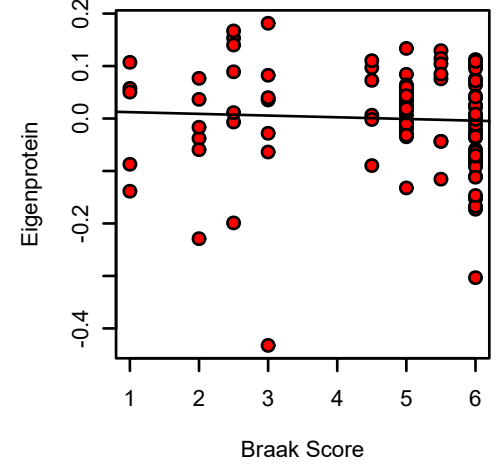

**M1 turquoise.Consensus**

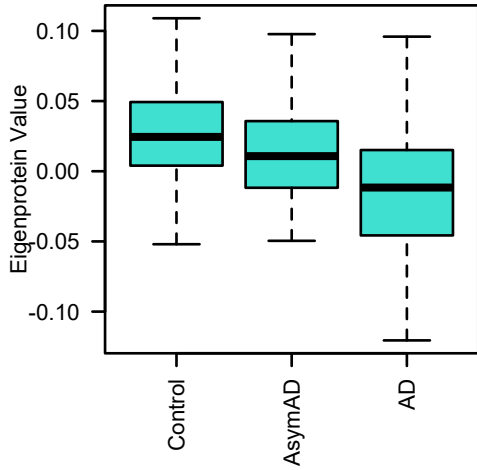

**M1 turquoise.MayoTC (Synthetic)**  
K-W ANOVA p: 0.029

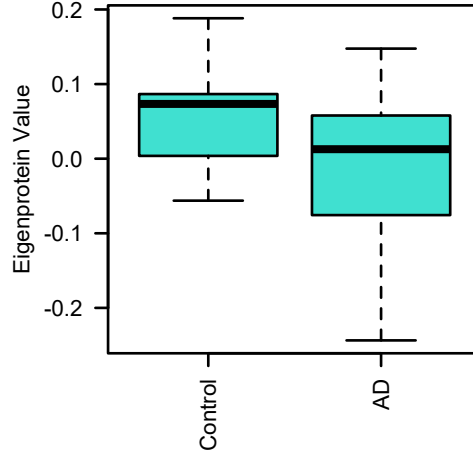

**bicor=-0.3, p=0.0015**  
**cor=-0.3, p=0.0017**

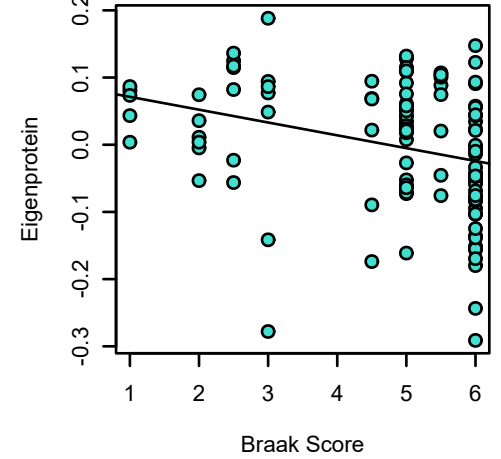

**M12 tan.Consensus**

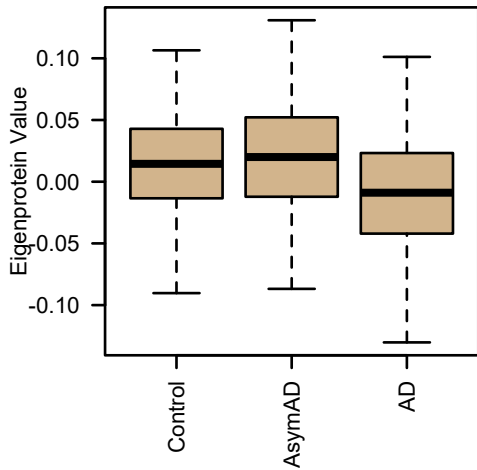

**M12 tan.MayoTC (Synthetic)**  
K-W ANOVA p: 0.011

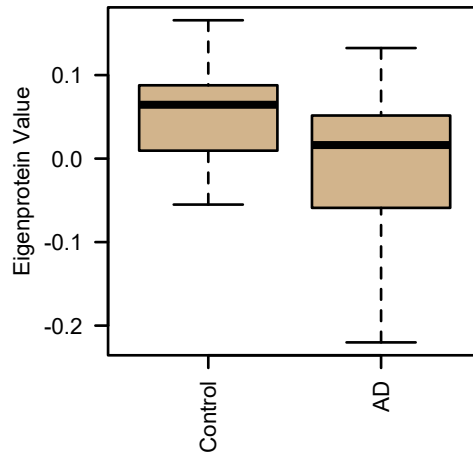

**bicor=-0.27, p=0.0054**  
**cor=-0.22, p=0.023**

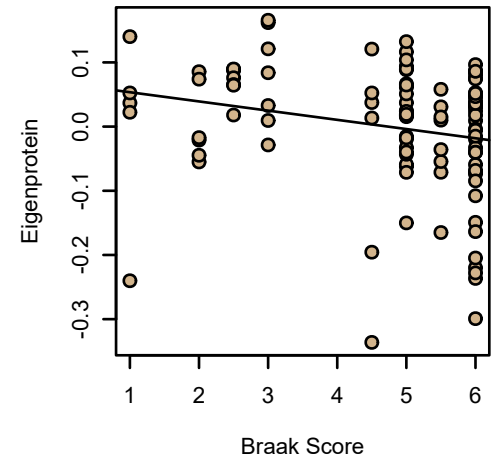

**M7 black.Consensus**

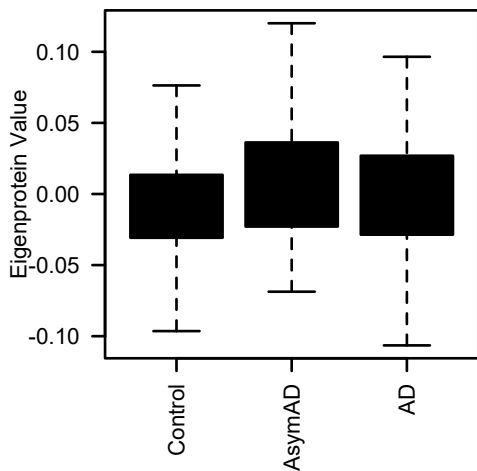

**M7 black.MayoTC (Synthetic)**  
K-W ANOVA p: 0.58

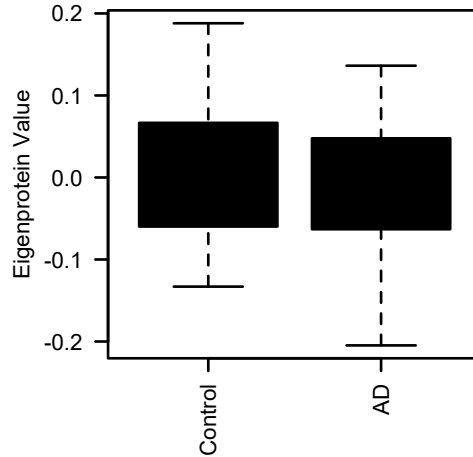

**bicor=-0.13, p=0.18**  
**cor=-0.097, p=0.32**

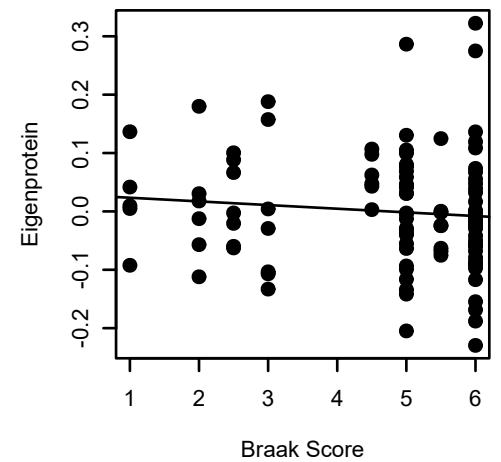

**M9 magenta.Consensus**

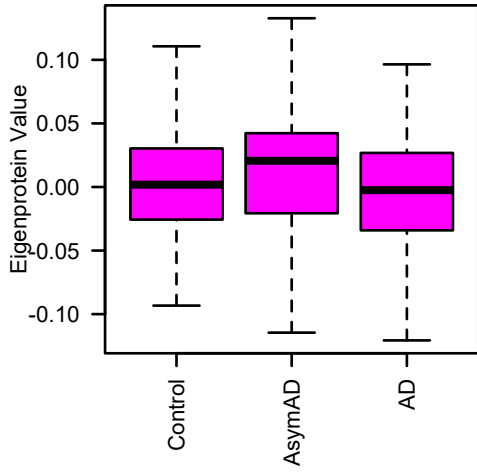

**M9 magenta.MayoTC (Synthetic)**  
K-W ANOVA p: 0.9

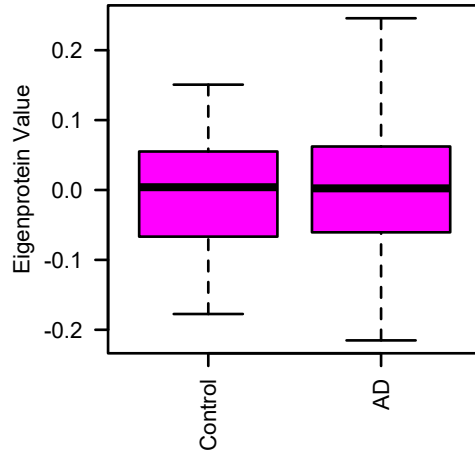

**bicor=0.036, p=0.72**  
**cor=0.029, p=0.77**

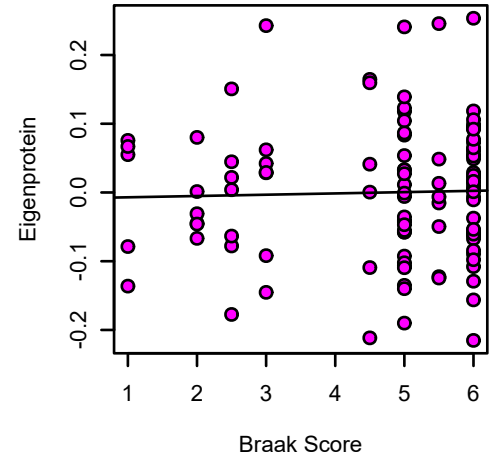

**Supplementary Figure 7. AD Network Modules in Temporal Cortex.** The top 20% of proteins by kME value in each AD brain protein network module was used to create a synthetic eigenprotein, which was then measured by case status in the Mayo cohort (temporal cortex) and correlated with Braak score ( $n=107$  independent case samples after network connectivity outlier removal). The first boxplot for each module is the AD network eigenprotein by case status, given as reference for the second boxplot, which is the synthetic eigenprotein in the Mayo cohort (control,  $n=25$ ; AD,  $n=82$ ). Synthetic eigenprotein differences by case status in the Mayo cohort were assessed by Kruskal-Wallis (K-W) one-way ANOVA. Correlations were performed using both Pearson correlation (*cor*) and biweight midcorrelation (*bicor*), which is more robust to outliers. Statistical significance at  $p < 0.05$  is highlighted in red. Boxplots represent the median, 25<sup>th</sup>, and 75<sup>th</sup> percentiles, and whiskers represent measurements to the 5<sup>th</sup> and 95<sup>th</sup> percentiles.

**M5 green.Consensus**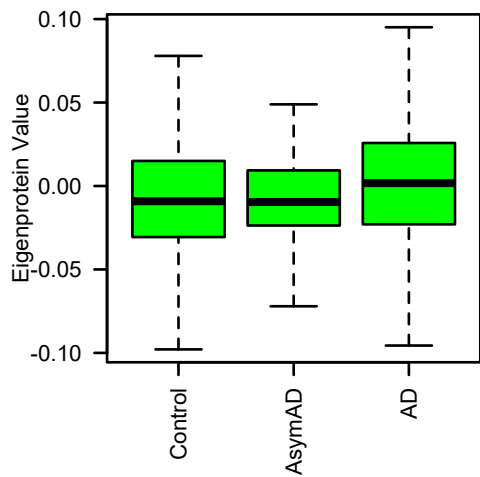**M5 green.BLSApc (Synthetic)**  
K-W ANOVA p: 0.41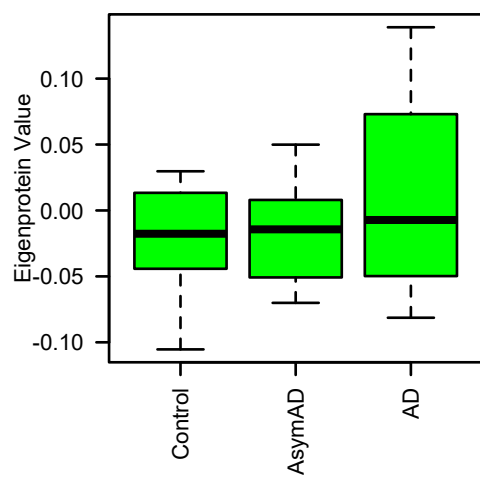**bicor=0.12, p=0.42**  
**cor=0.13, p=0.39**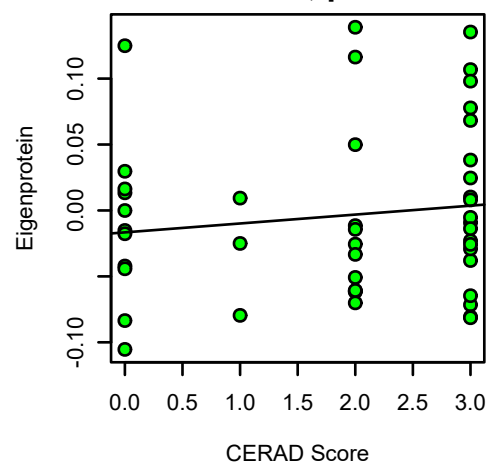**bicor=0.33, p=0.023**  
**cor=0.34, p=0.021**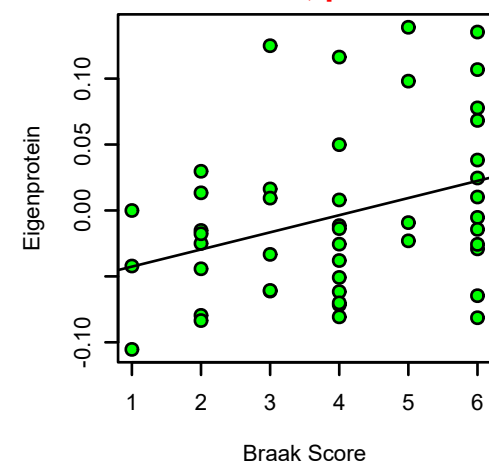**M8 pink.Consensus**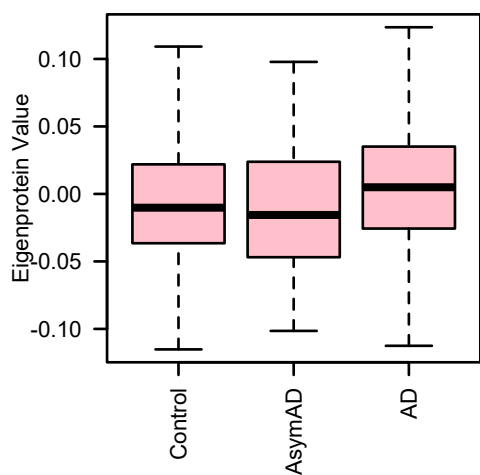**M8 pink.BLSApc (Synthetic)**  
K-W ANOVA p: 0.25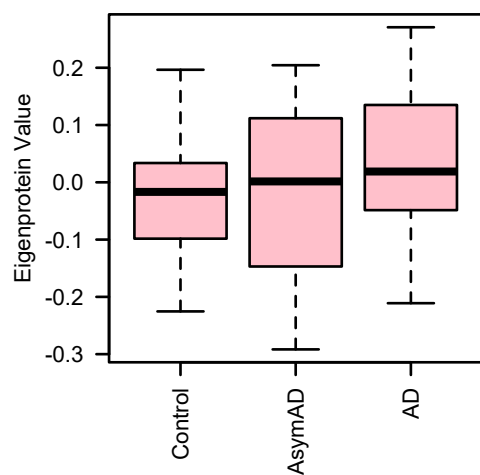**bicor=0.22, p=0.14**  
**cor=0.23, p=0.12**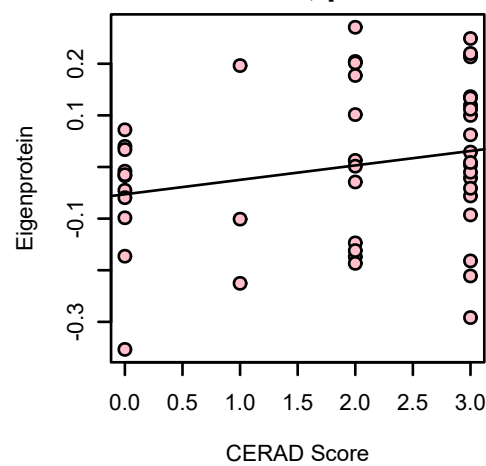**bicor=0.3, p=0.04**  
**cor=0.3, p=0.043**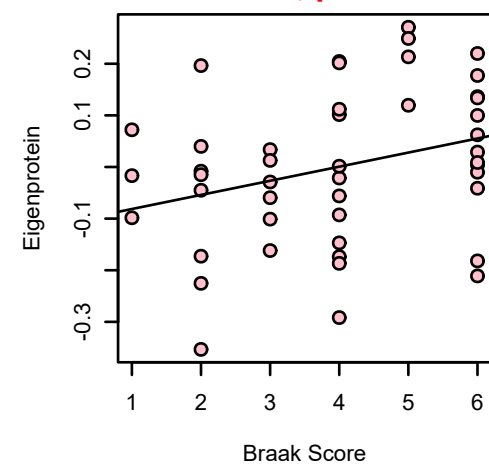**M10 purple.Consensus**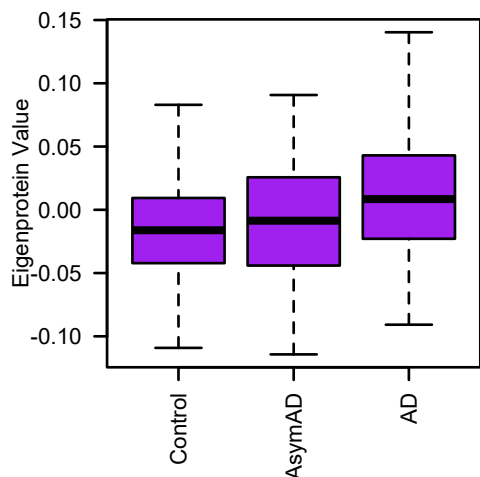**M10 purple.BLSApc (Synthetic)**  
K-W ANOVA p: 0.28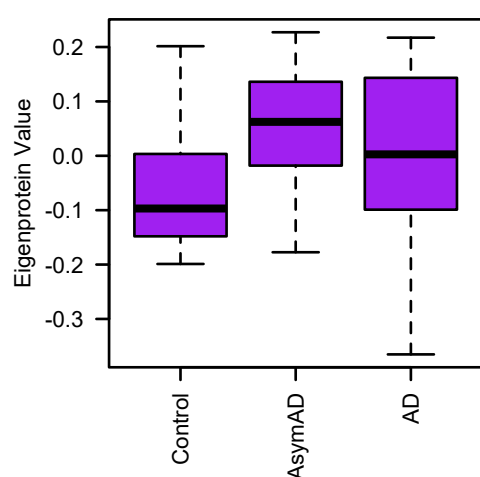**bicor=0.15, p=0.31**  
**cor=0.15, p=0.32**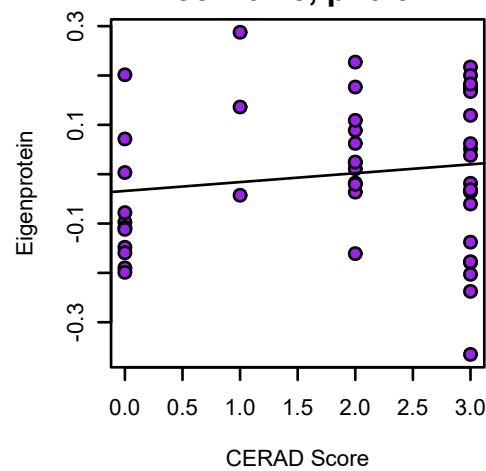**bicor=0.067, p=0.66**  
**cor=0.051, p=0.74**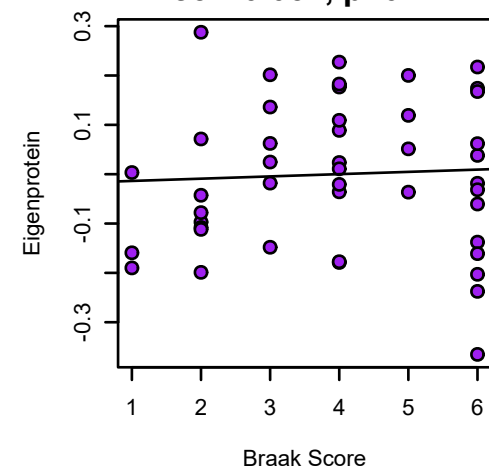**M2 blue.Consensus**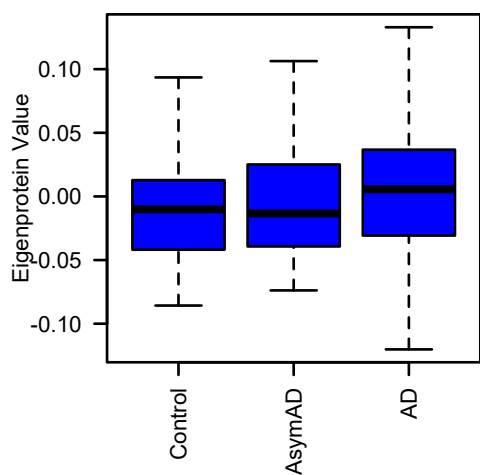**M2 blue.BLSApc (Synthetic)**  
K-W ANOVA p: 0.23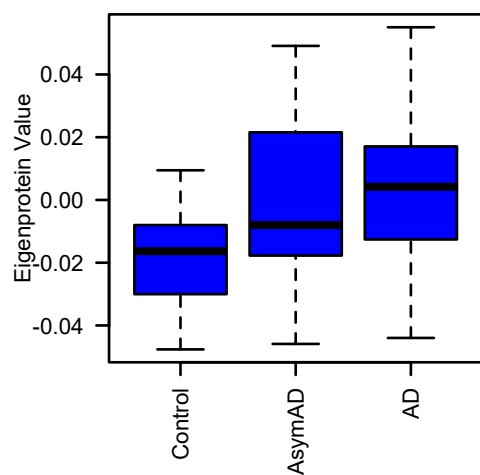**bicor=0.2, p=0.18**  
**cor=0.23, p=0.12**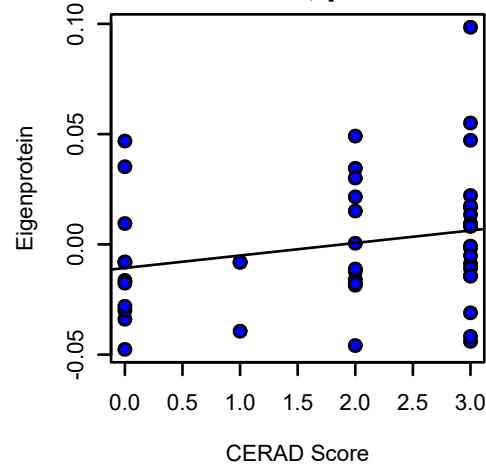**bicor=0.19, p=0.21**  
**cor=0.17, p=0.26**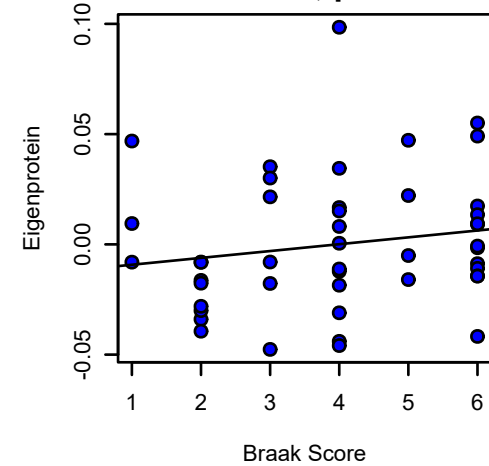

**M4 yellow.Consensus**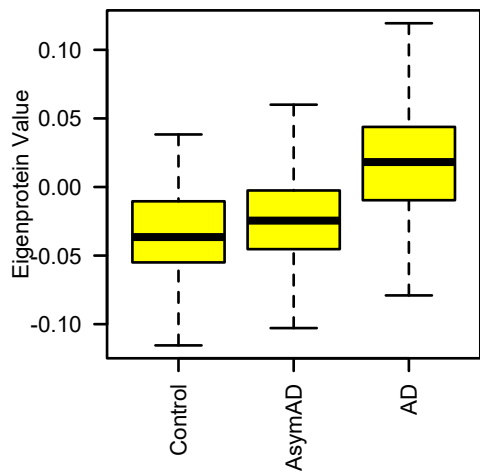**M4 yellow.BLSApc (Synthetic)**  
K-W ANOVA p: 3.1e-05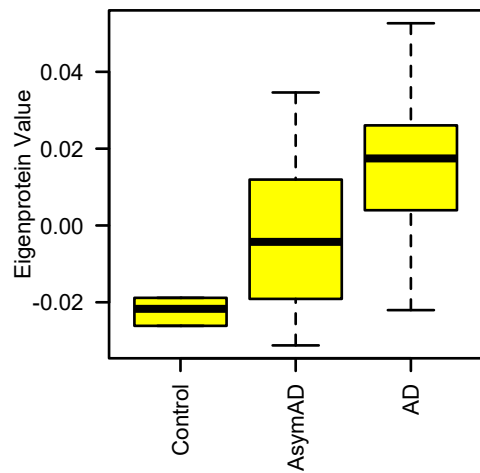**bicor=0.54, p=9.8e-05**  
**cor=0.54, p=0.00011**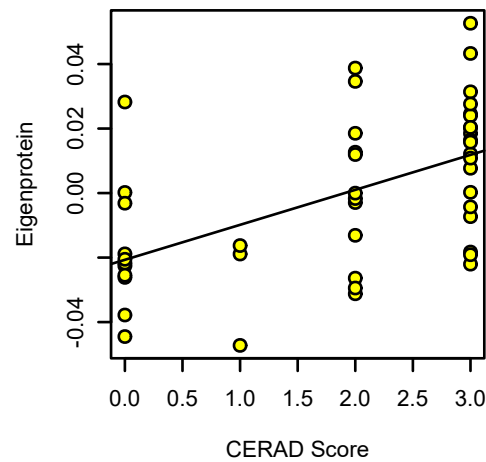**bicor=0.66, p=6.8e-07**  
**cor=0.65, p=1e-06**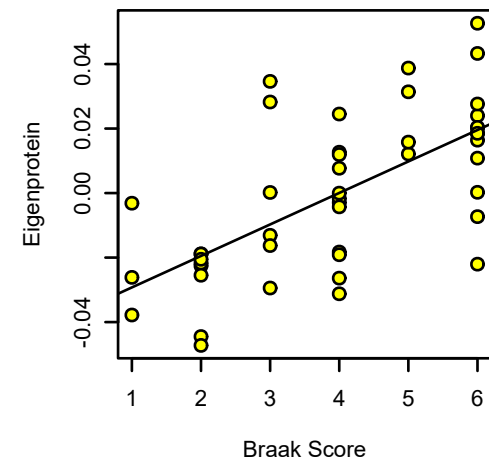**M11 greenyellow.Consensus**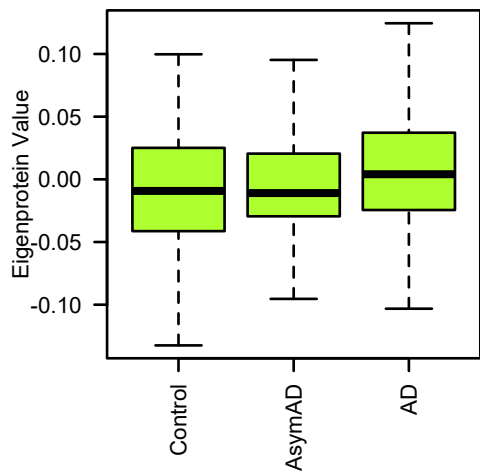**M11 greenyellow.BLSApc (Synthetic)**  
K-W ANOVA p: 0.74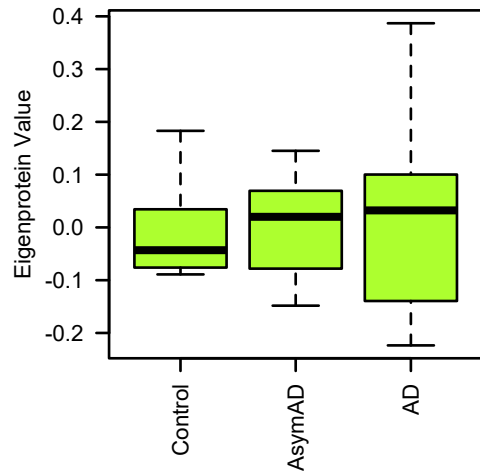**bicor=0.069, p=0.65**  
**cor=0.11, p=0.47**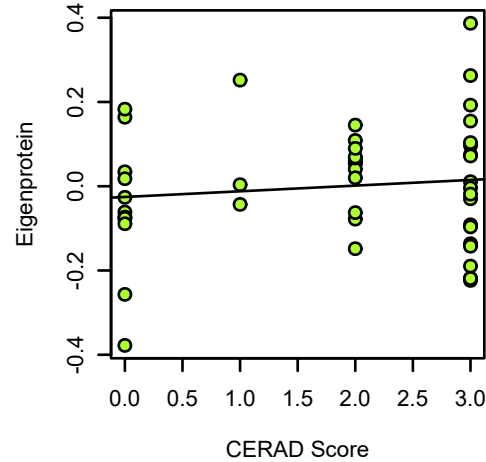**bicor=0.093, p=0.54**  
**cor=0.12, p=0.43**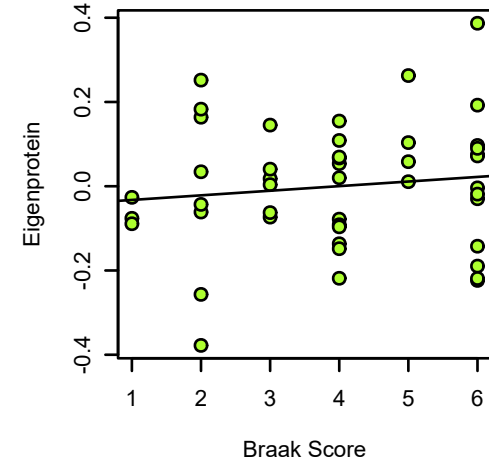**M13 salmon.Consensus**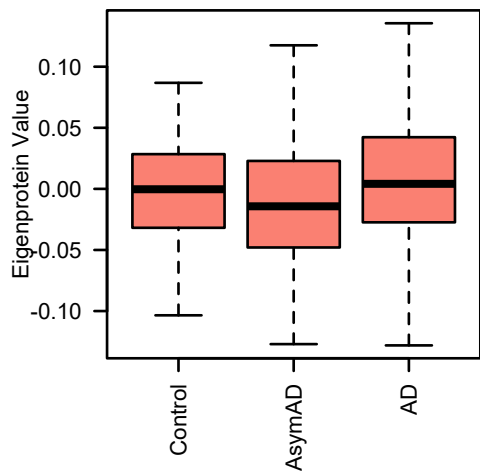**M13 salmon.BLSApc (Synthetic)**  
K-W ANOVA p: 6e-04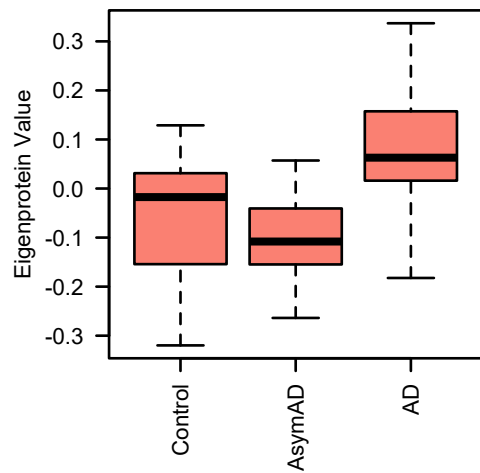**bicor=0.28, p=0.058**  
**cor=0.28, p=0.059**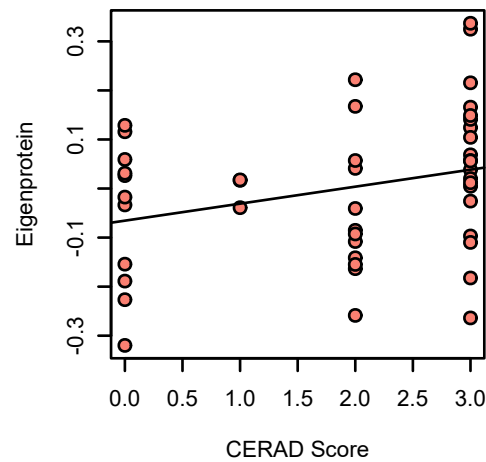**bicor=0.44, p=0.0024**  
**cor=0.44, p=0.0022**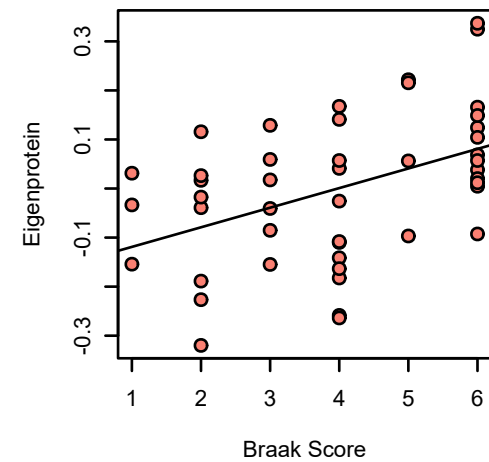**M3 brown.Consensus**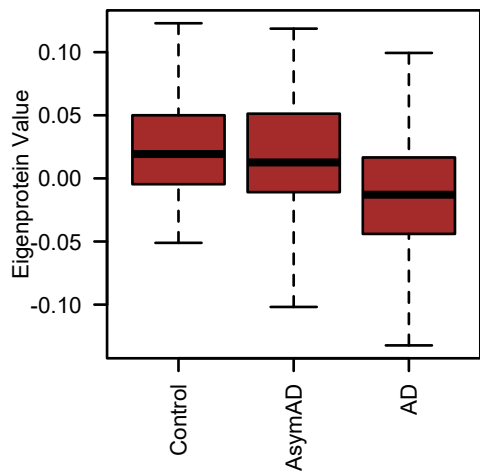**M3 brown.BLSApc (Synthetic)**  
K-W ANOVA p: 0.0078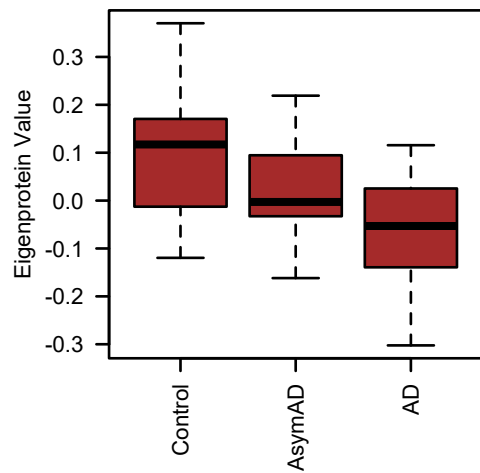**bicor=-0.34, p=0.019**  
**cor=-0.33, p=0.025**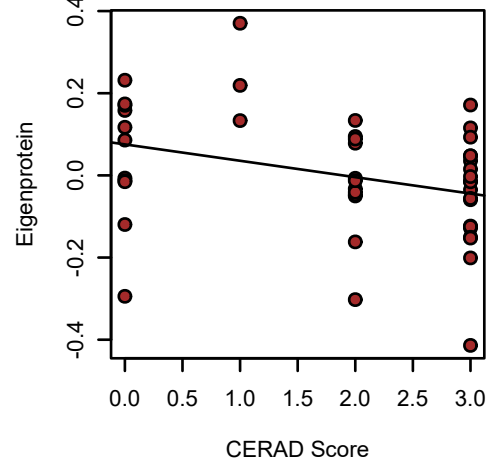**bicor=-0.39, p=0.0072**  
**cor=-0.39, p=0.0074**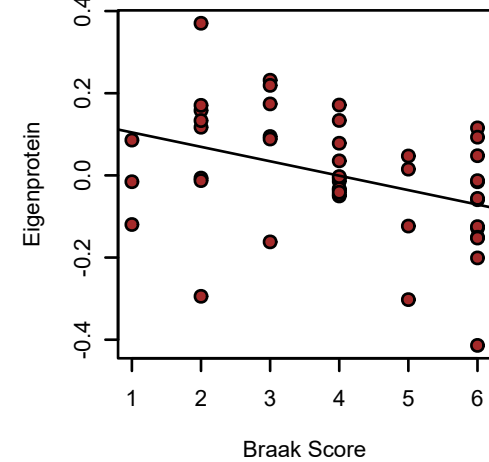

**M6 red.Consensus**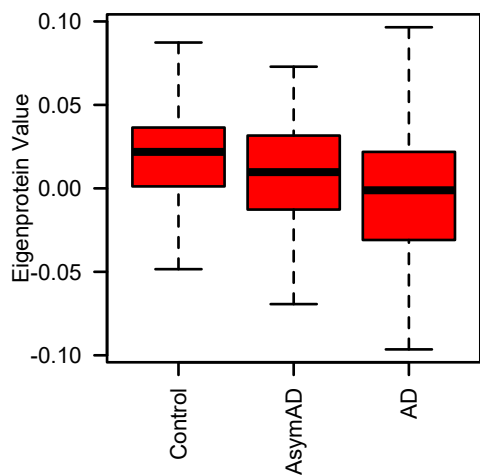**M6 red.BLSApc (Synthetic)**  
K-W ANOVA p: 0.015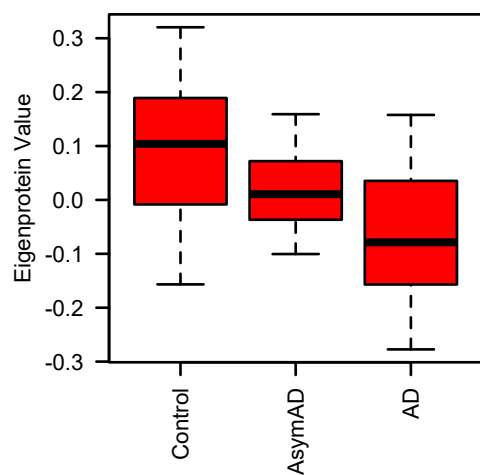**bicor=-0.36, p=0.013**  
**cor=-0.36, p=0.014**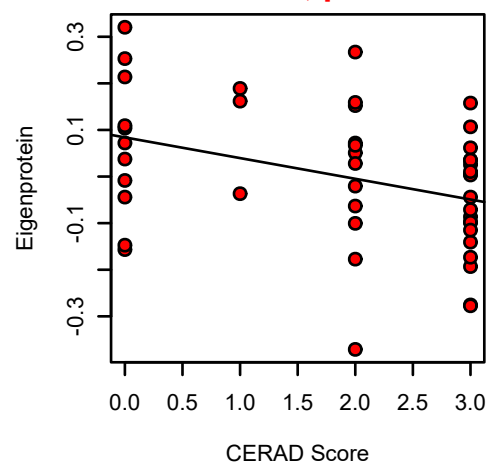**bicor=-0.42, p=0.0041**  
**cor=-0.4, p=0.0059**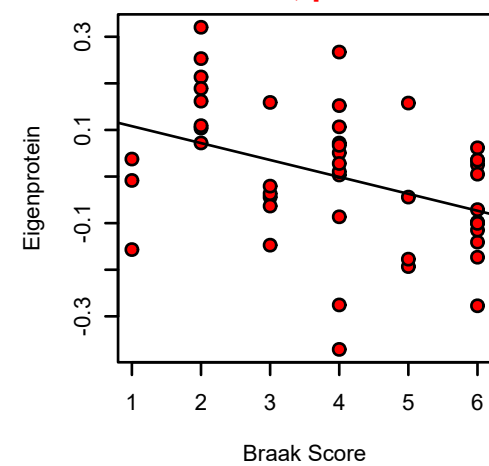**M1 turquoise.Consensus**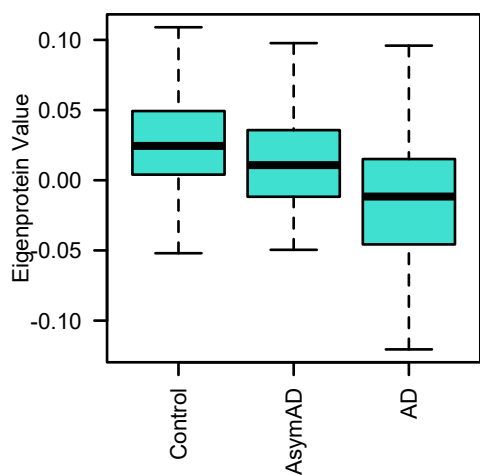**M1 turquoise.BLSApc (Synthetic)**  
K-W ANOVA p: 0.00036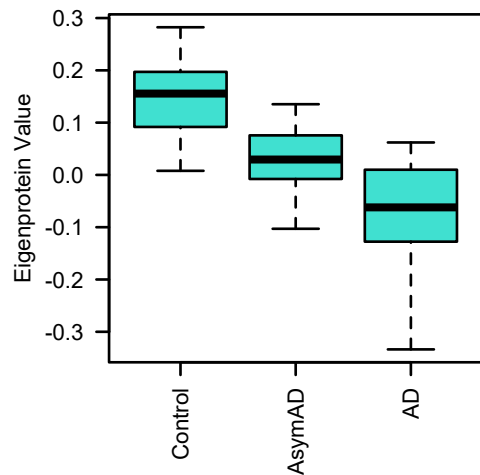**bicor=-0.49, p=0.00056**  
**cor=-0.48, p=0.00074**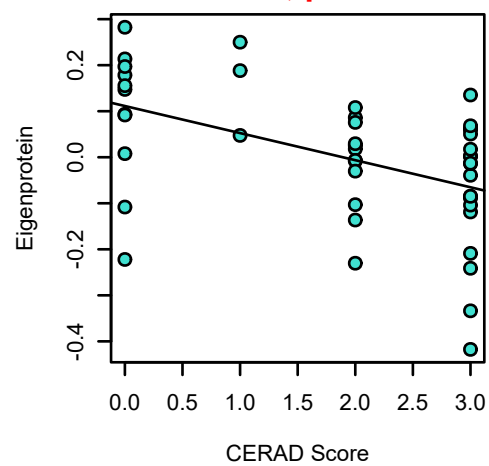**bicor=-0.55, p=6.4e-05**  
**cor=-0.52, p=0.00021**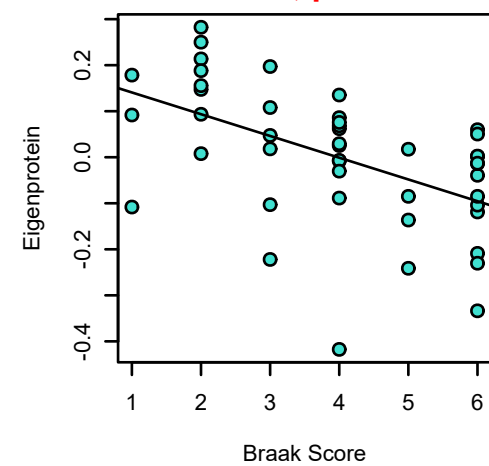**M12 tan.Consensus**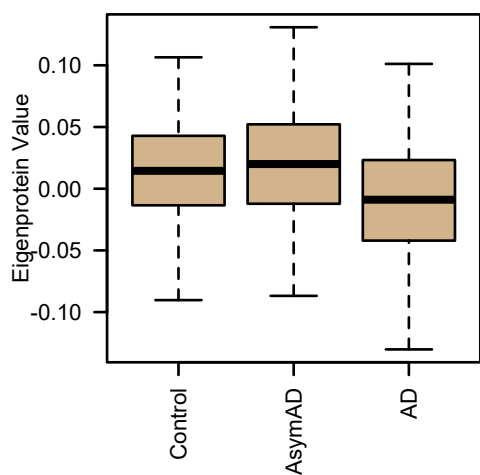**M12 tan.BLSApc (Synthetic)**  
K-W ANOVA p: 0.77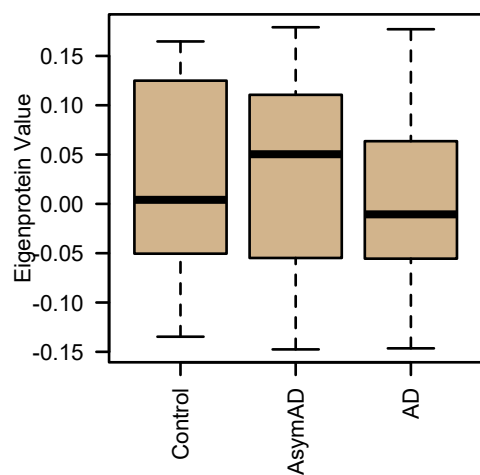**bicor=-0.073, p=0.63**  
**cor=0.0067, p=0.96**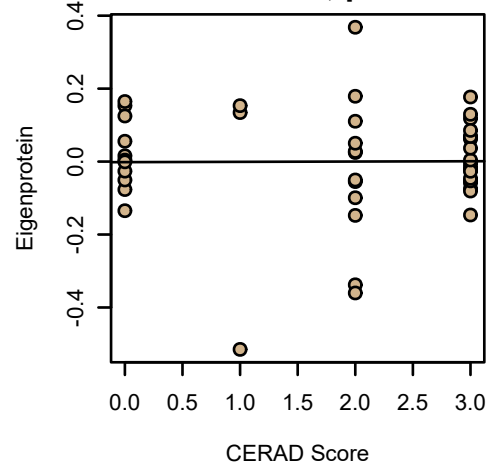**bicor=-0.14, p=0.34**  
**cor=-0.022, p=0.88**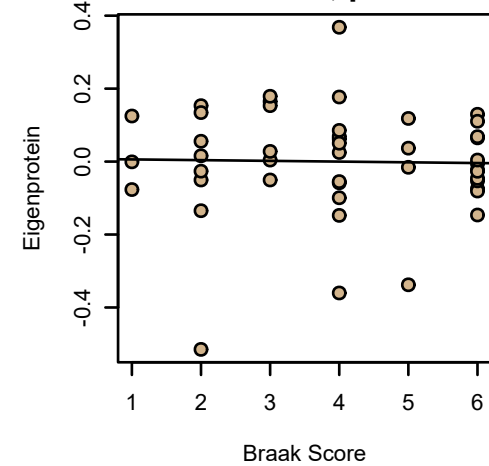**M7 black.Consensus**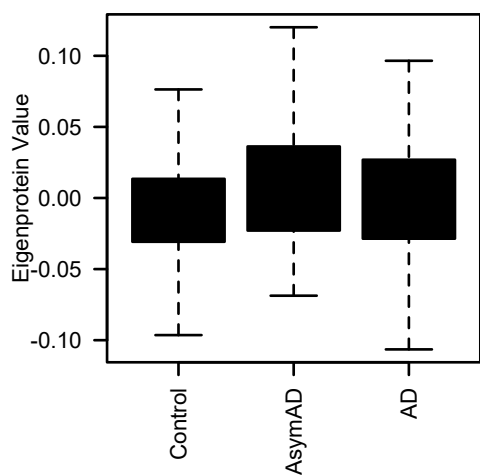**M7 black.BLSApc (Synthetic)**  
K-W ANOVA p: 0.26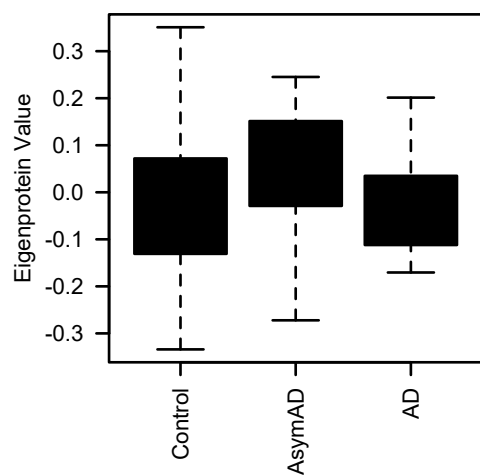**bicor=0.027, p=0.86**  
**cor=0.051, p=0.74**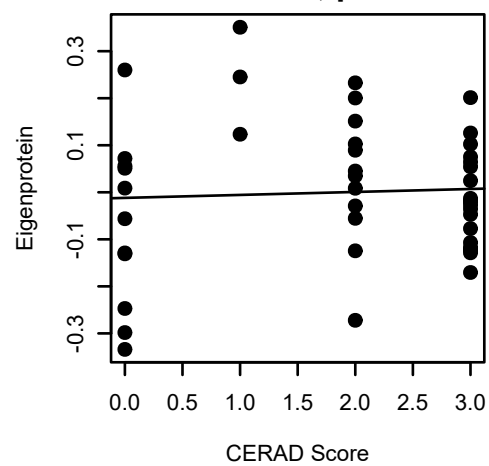**bicor=-0.025, p=0.87**  
**cor=-0.0056, p=0.97**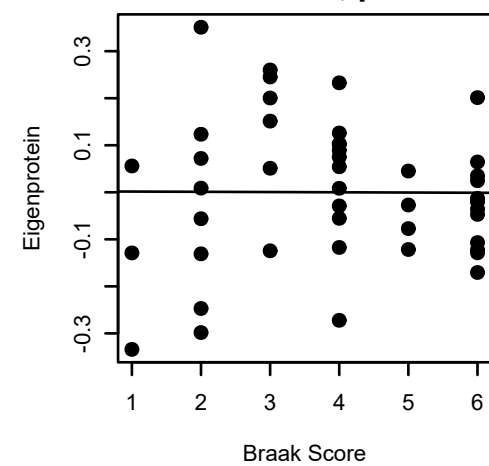

**M9 magenta.Consensus**

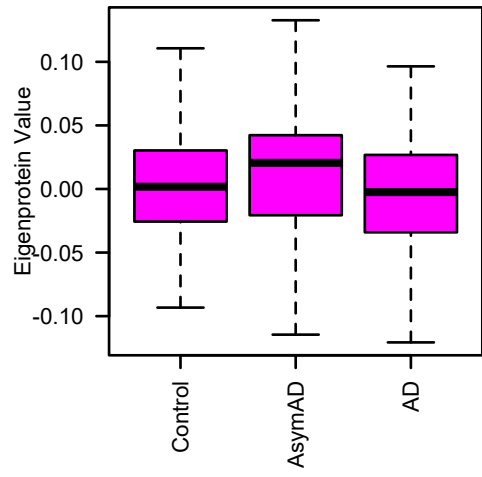

**M9 magenta.BLSApc (Synthetic)**  
K-W ANOVA p: 0.1

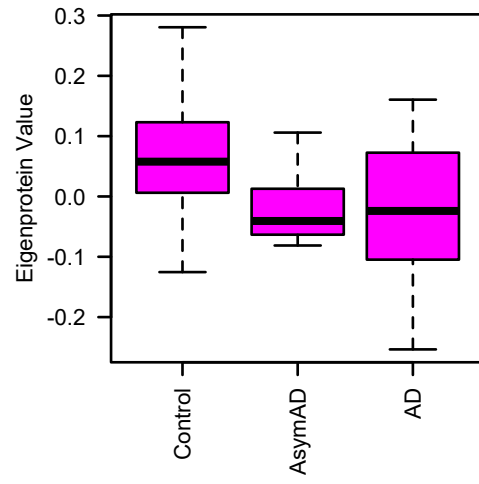

**bicor=-0.27, p=0.072**  
**cor=-0.28, p=0.059**

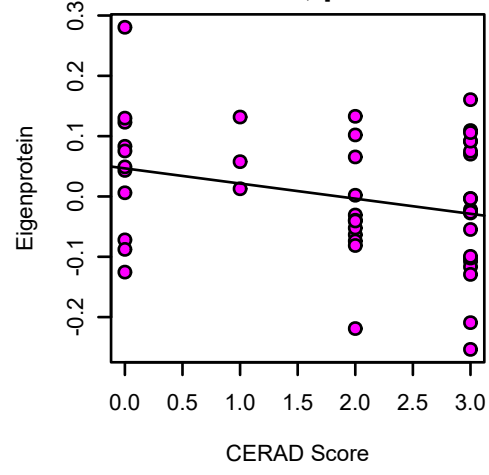

**bicor=-0.29, p=0.047**  
**cor=-0.3, p=0.043**

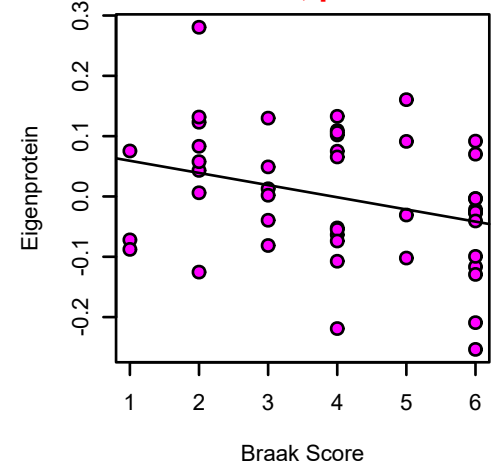

**Supplementary Figure 8. AD Network Modules in Precuneus.** The top 20% of proteins by kME value in each AD brain protein network module was used to create a synthetic eigenprotein, which was then measured by case status in the BLSA cohort (precuneus) and correlated with CERAD and Braak scores ( $n=46$  independent case samples). The first boxplot for each module is the AD network eigenprotein by case status, given as reference for the second boxplot, which is the synthetic eigenprotein in the BLSA precuneus cohort (control,  $n=13$ ; AsymAD,  $n=13$ ; AD,  $n=20$ ). Synthetic eigenprotein differences by case status in the BLSA precuneus cohort were assessed by Kruskal-Wallis (K-W) one-way ANOVA. Correlations were performed using both Pearson correlation (cor) and biweight midcorrelation (bicor), which is more robust to outliers. Statistical significance at  $p < 0.05$  is highlighted in red. Boxplots represent the median, 25<sup>th</sup>, and 75<sup>th</sup> percentiles, and whiskers represent measurements to the 5<sup>th</sup> and 95<sup>th</sup> percentiles.



**M5 green.Consensus**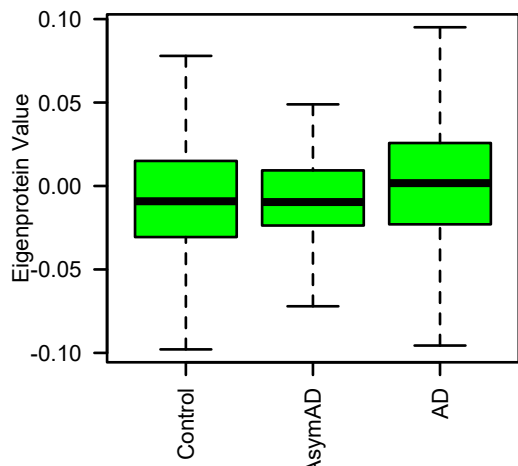**M5 green.Aging (Synthetic)  
K-W ANOVA p: 0.97**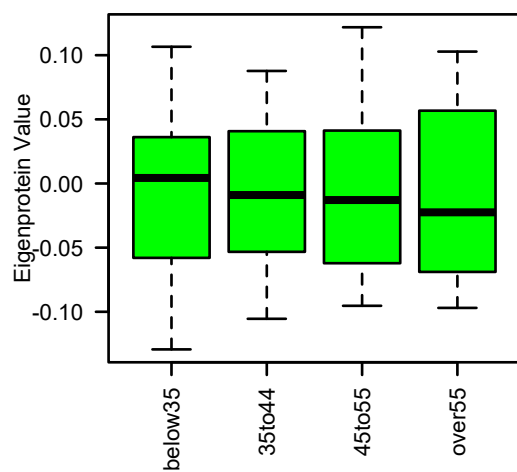**M5 green.Aging (Synthetic)  
K-W ANOVA p: 0.33**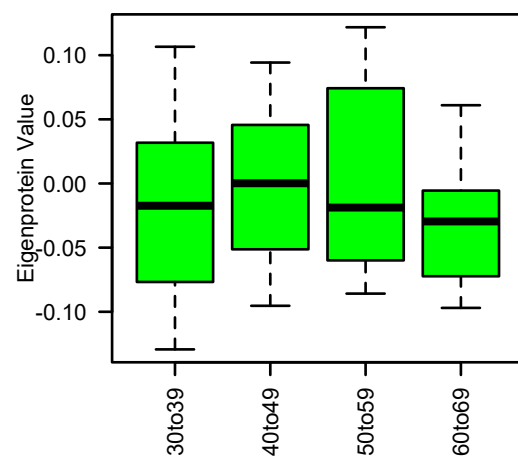**bicor=8e-04, p=0.99  
cor=-0.011, p=0.92**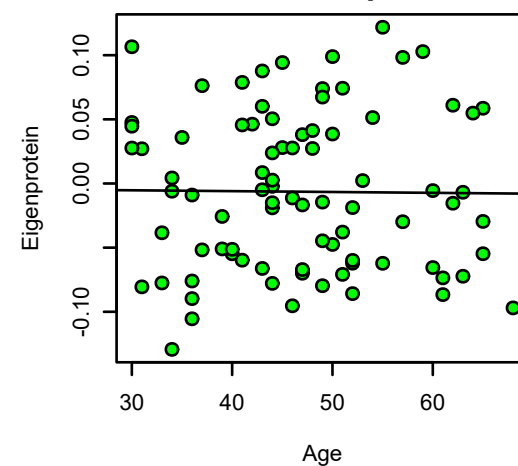**M8 pink.Consensus**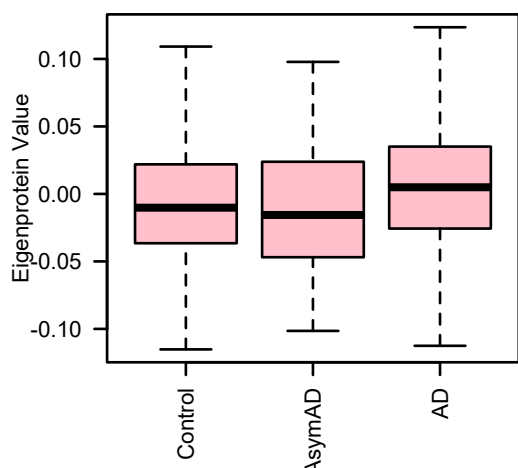**M8 pink.Aging (Synthetic)  
K-W ANOVA p: 0.65**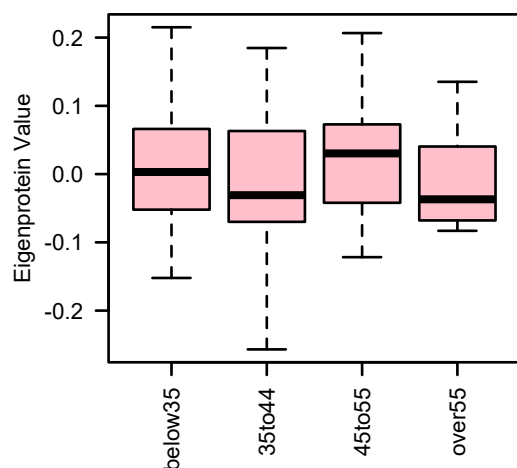**M8 pink.Aging (Synthetic)  
K-W ANOVA p: 0.51**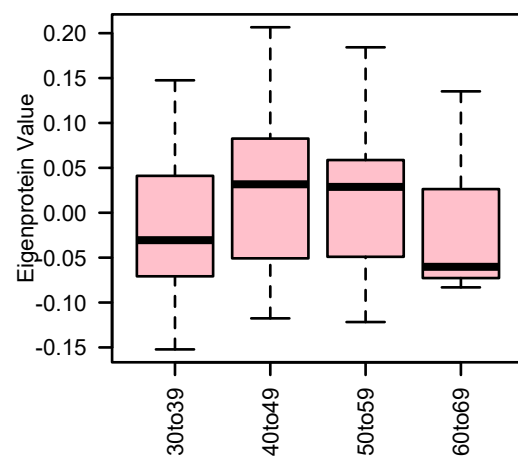**bicor=-0.047, p=0.67  
cor=-0.078, p=0.48**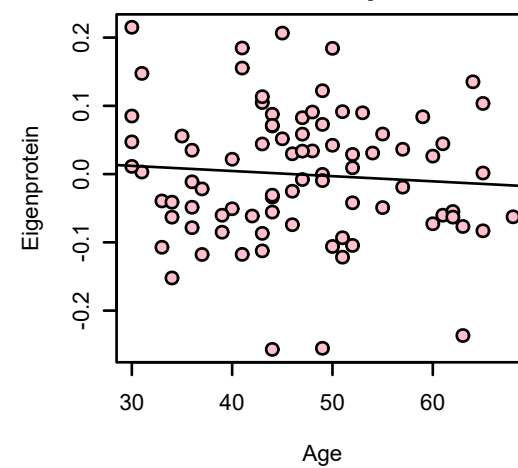**M10 purple.Consensus**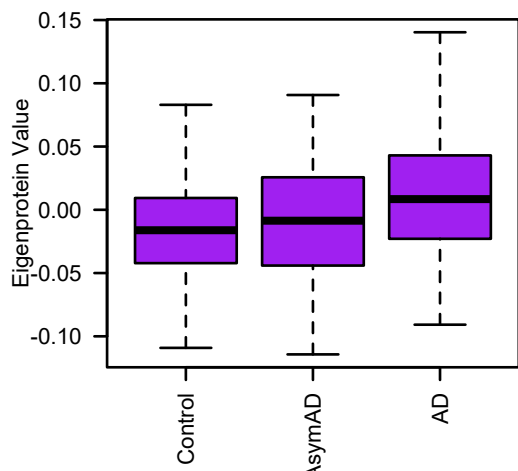**M10 purple.Aging (Synthetic)  
K-W ANOVA p: 0.49**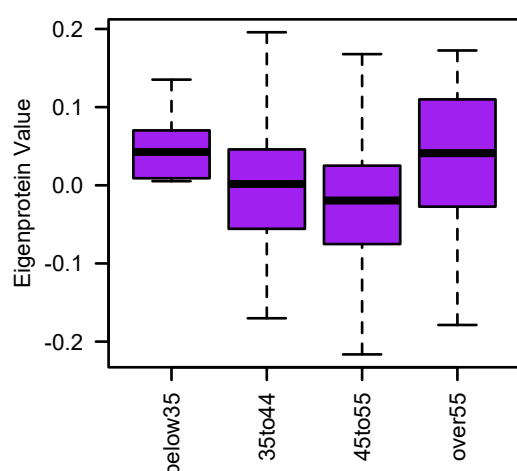**M10 purple.Aging (Synthetic)  
K-W ANOVA p: 0.091**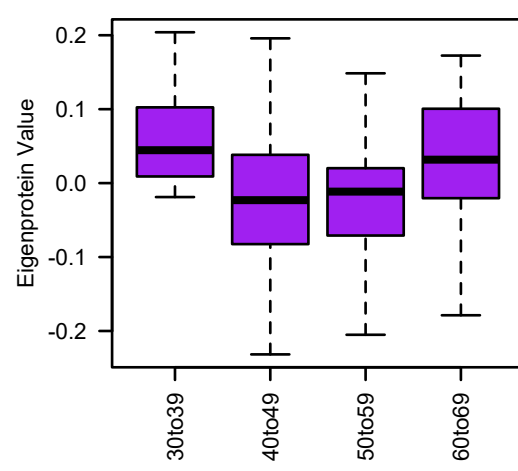**bicor=-0.049, p=0.66  
cor=-0.026, p=0.81**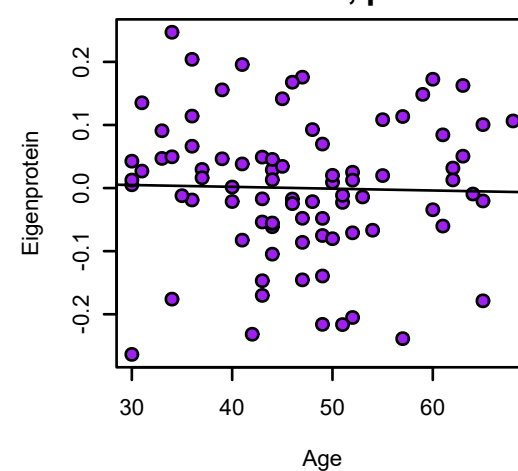**M2 blue.Consensus**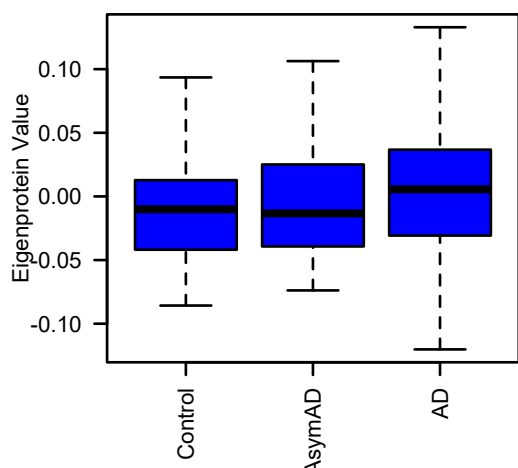**M2 blue.Aging (Synthetic)  
K-W ANOVA p: 0.37**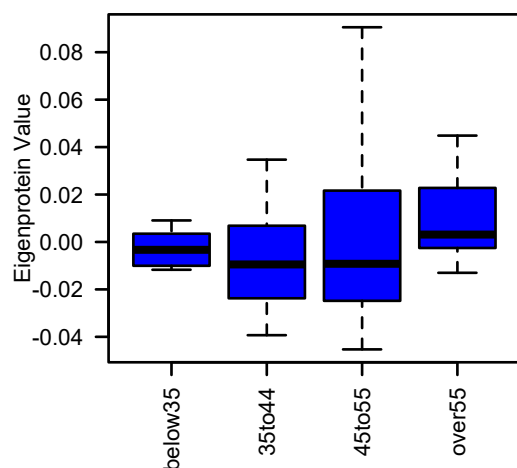**M2 blue.Aging (Synthetic)  
K-W ANOVA p: 0.24**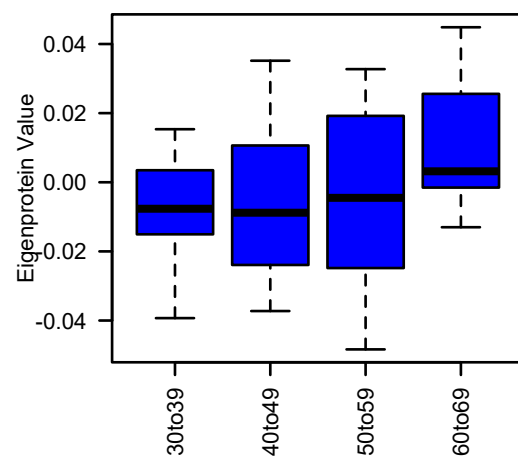**bicor=0.21, p=0.06  
cor=0.18, p=0.1**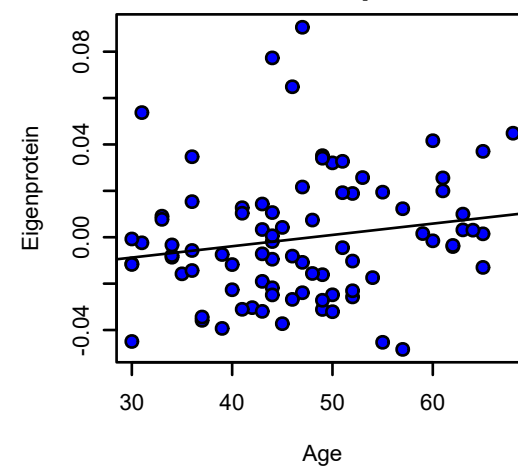

**M4 yellow.Consensus**

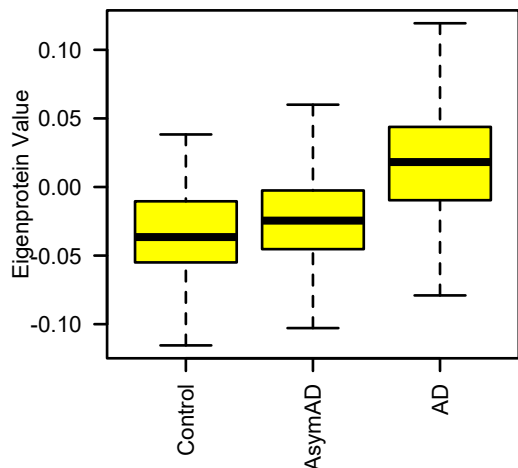

**M4 yellow.Aging (Synthetic)**  
K-W ANOVA p: 0.083

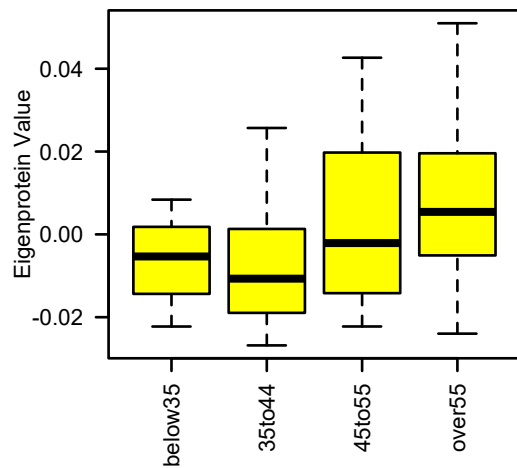

**M4 yellow.Aging (Synthetic)**  
K-W ANOVA p: 0.14

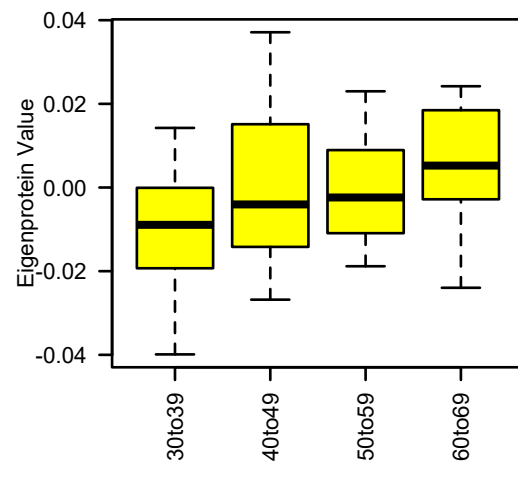

**bicor=0.28, p=0.01**  
**cor=0.25, p=0.022**

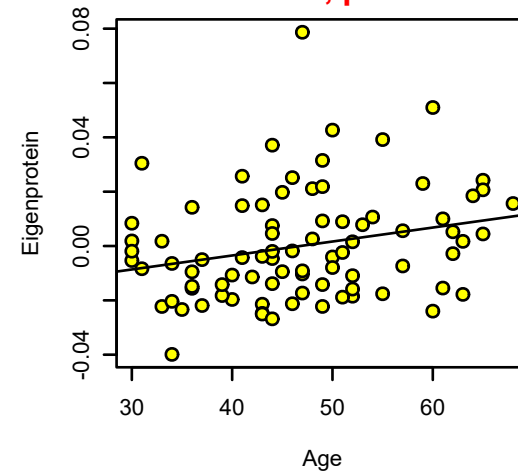

**M11 greenyellow.Consensus**

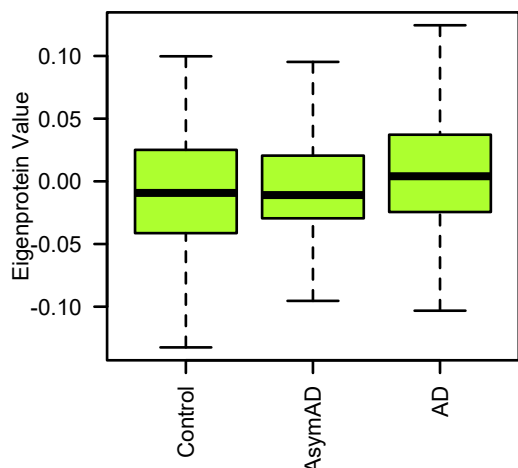

**M11 greenyellow.Aging (Synthetic)**  
K-W ANOVA p: 0.53

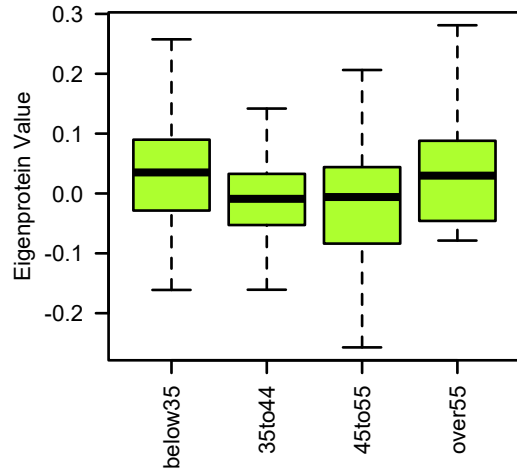

**M11 greenyellow.Aging (Synthetic)**  
K-W ANOVA p: 0.18

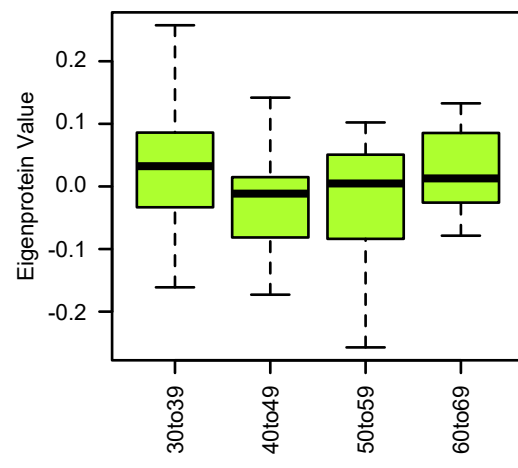

**bicor=0.0075, p=0.95**  
**cor=-0.057, p=0.61**

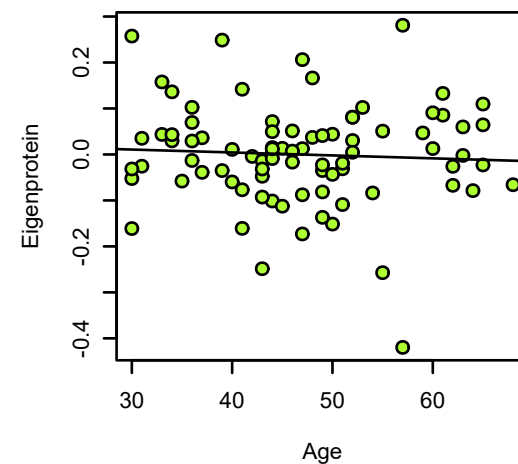

**M13 salmon.Consensus**

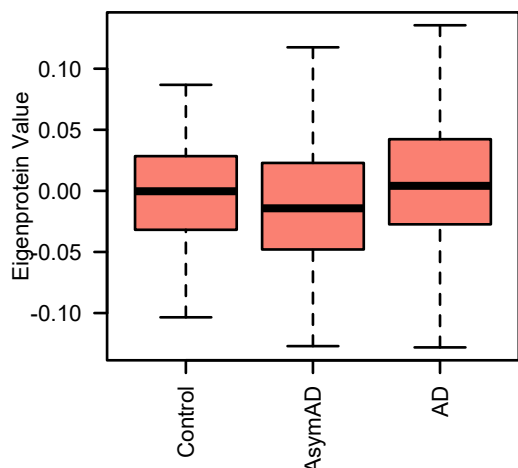

**M13 salmon.Aging (Synthetic)**  
K-W ANOVA p: 0.89

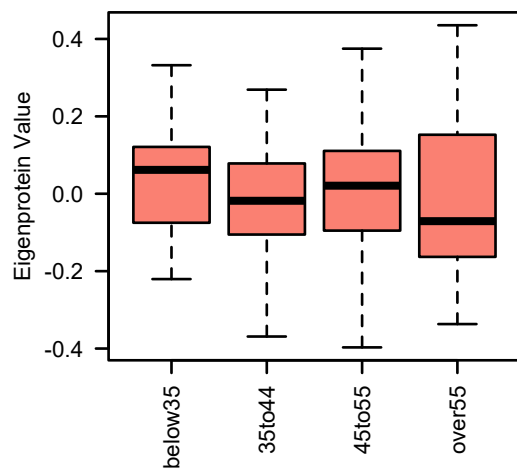

**M13 salmon.Aging (Synthetic)**  
K-W ANOVA p: 0.065

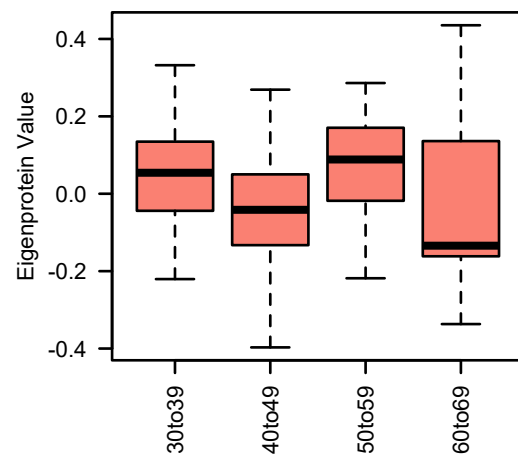

**bicor=-0.002, p=0.99**  
**cor=0.0057, p=0.96**

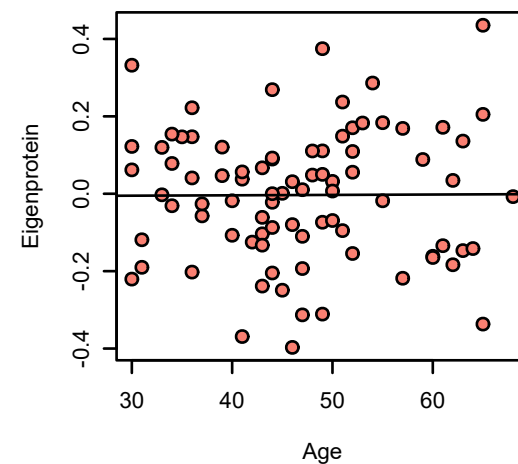

**M3 brown.Consensus**

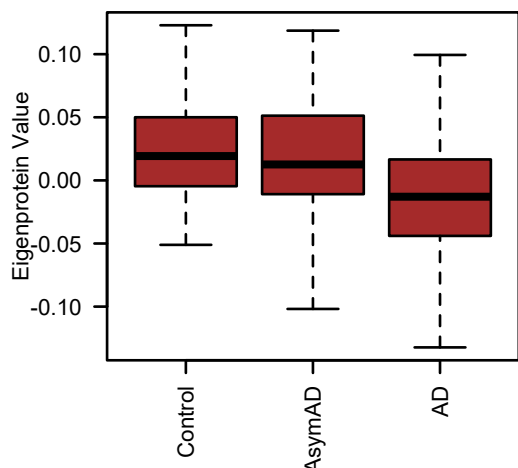

**M3 brown.Aging (Synthetic)**  
K-W ANOVA p: 0.68

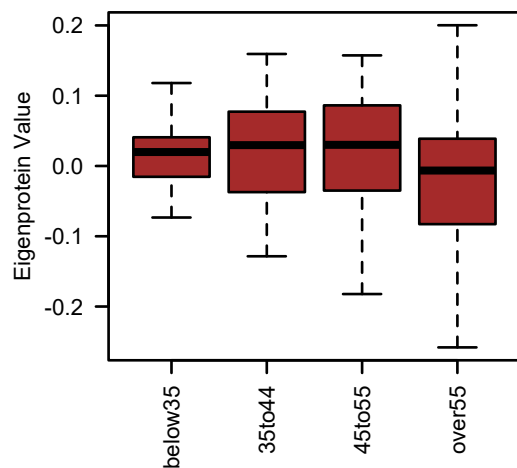

**M3 brown.Aging (Synthetic)**  
K-W ANOVA p: 0.91

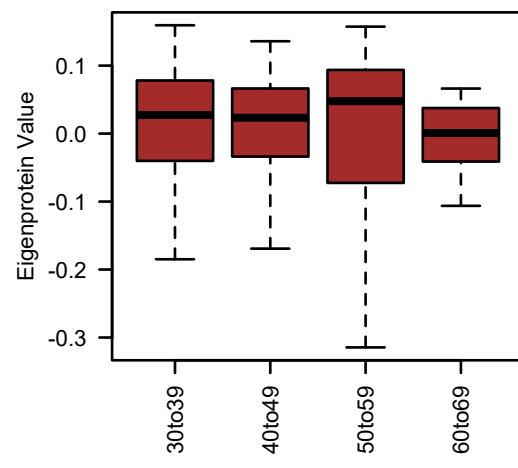

**bicor=-0.028, p=0.8**  
**cor=-0.04, p=0.72**

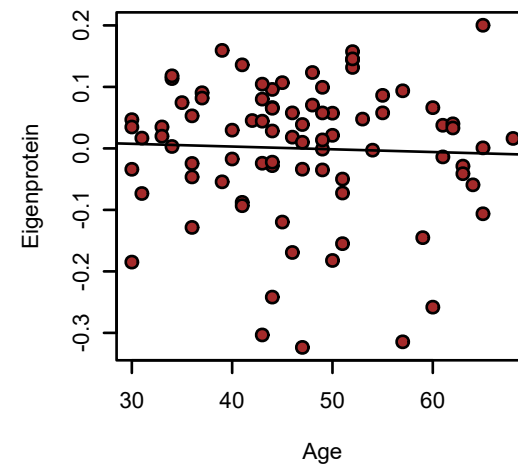

**M6 red.Consensus**

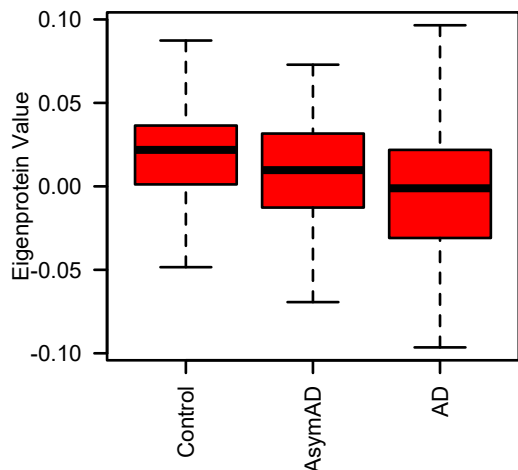

**M6 red.Aging (Synthetic)**  
K-W ANOVA p: 0.24

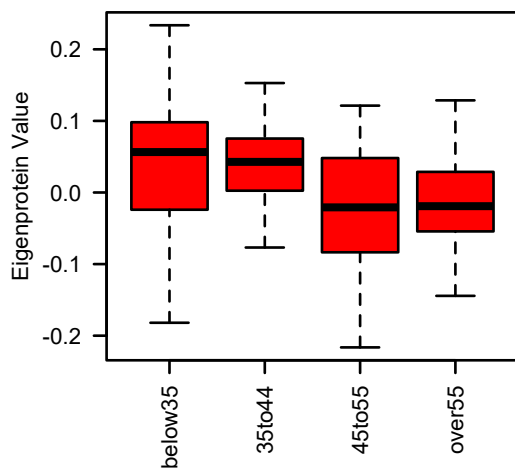

**M6 red.Aging (Synthetic)**  
K-W ANOVA p: 0.17

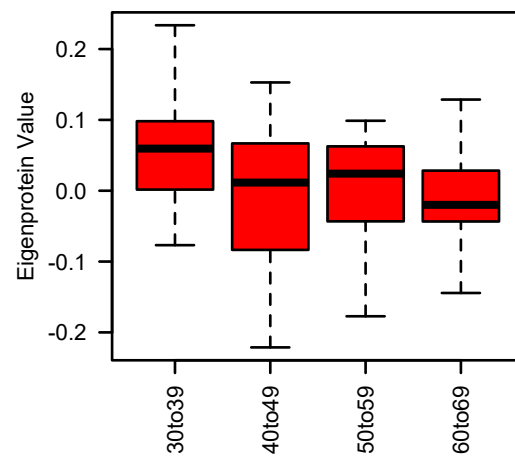

**bicor=-0.21, p=0.055**  
**cor=-0.18, p=0.1**

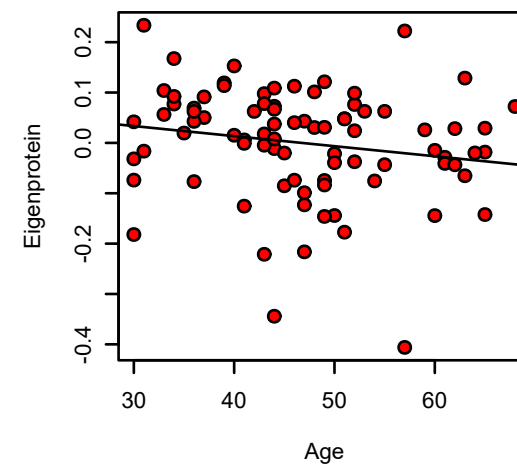

**M1 turquoise.Consensus**

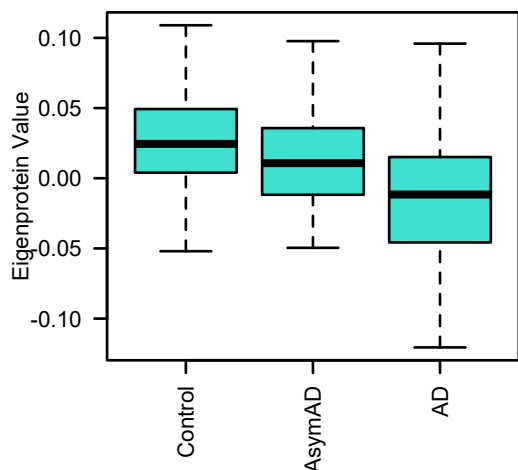

**M1 turquoise.Aging (Synthetic)**  
K-W ANOVA p: 0.074

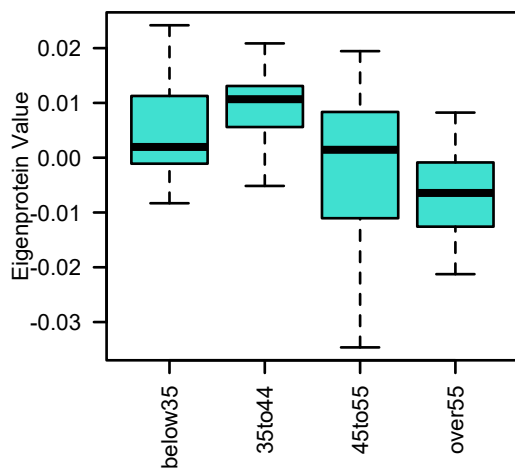

**M1 turquoise.Aging (Synthetic)**  
K-W ANOVA p: 0.15

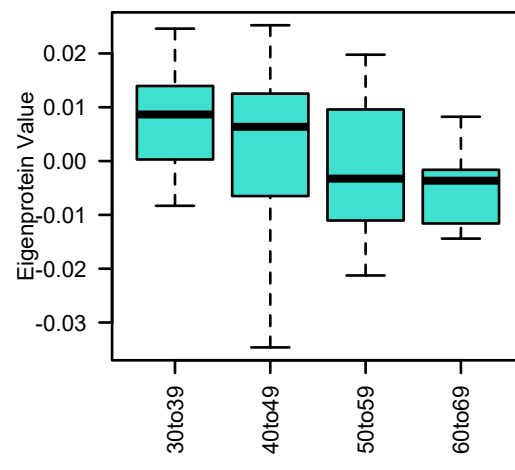

**bicor=-0.35, p=0.001**  
**cor=-0.23, p=0.035**

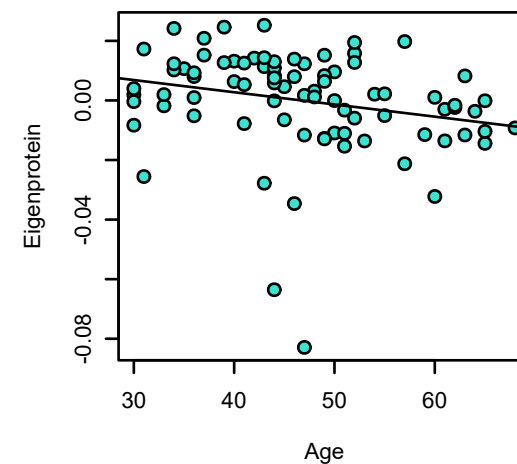

**M12 tan.Consensus**

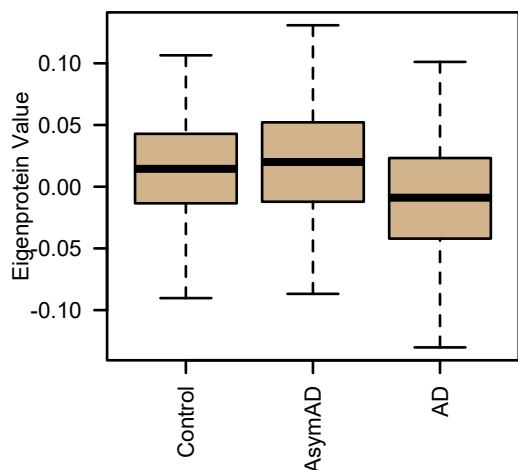

**M12 tan.Aging (Synthetic)**  
K-W ANOVA p: 0.5

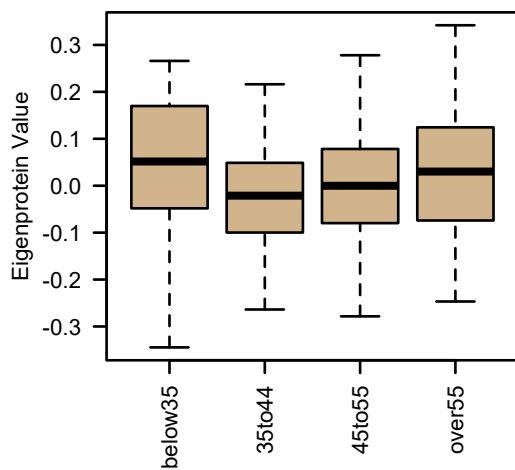

**M12 tan.Aging (Synthetic)**  
K-W ANOVA p: 0.66

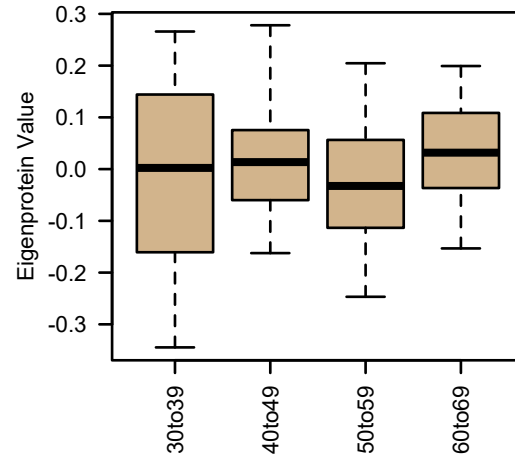

**bicor=0.025, p=0.82**  
**cor=0.059, p=0.59**

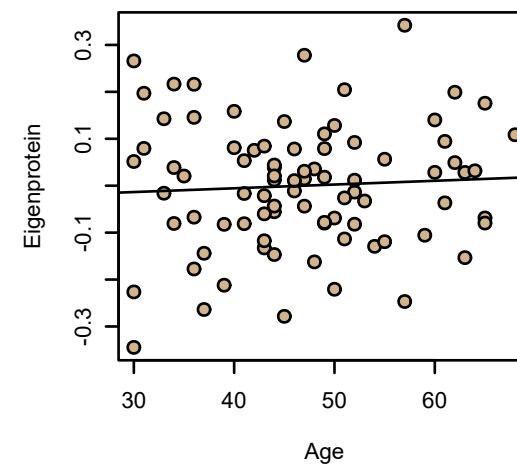

**M7 black.Consensus**

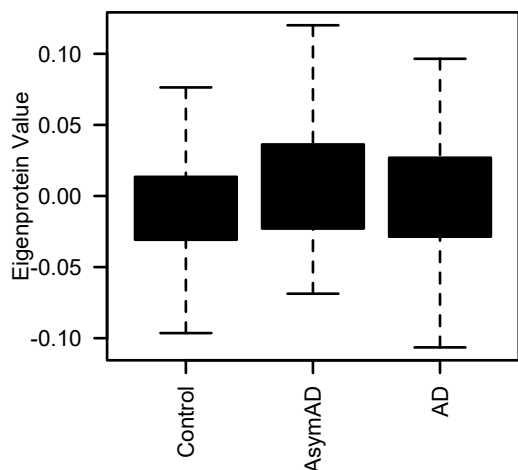

**M7 black.Aging (Synthetic)**  
K-W ANOVA p: 0.3

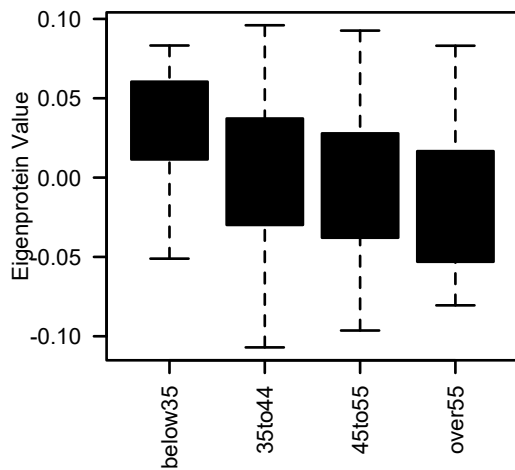

**M7 black.Aging (Synthetic)**  
K-W ANOVA p: 0.33

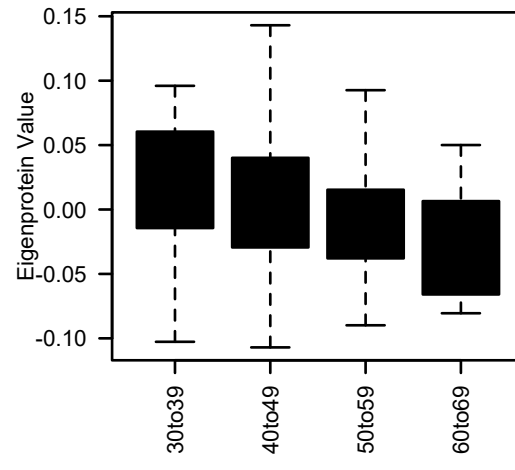

**bicor=-0.2, p=0.071**  
**cor=-0.19, p=0.083**

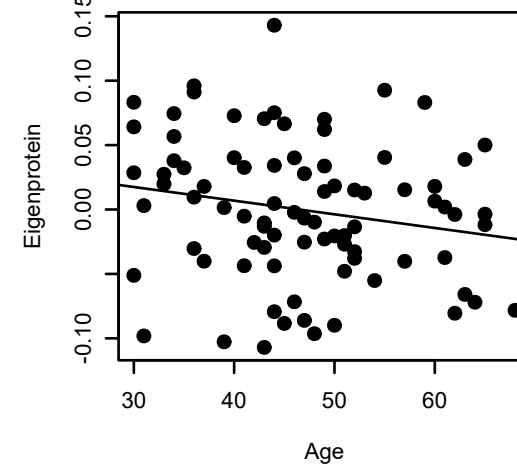

**M9 magenta.Consensus**

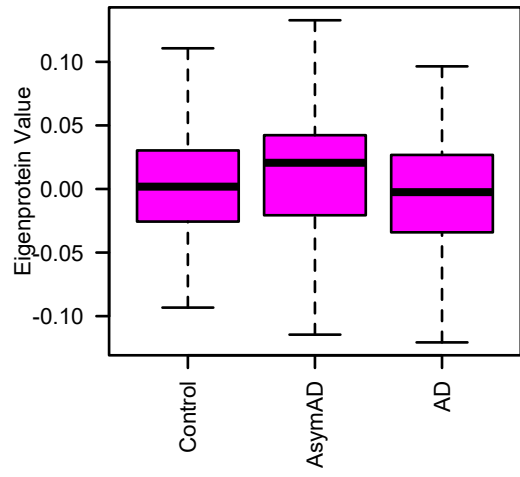

**M9 magenta.Aging (Synthetic)**  
**K-W ANOVA p: 0.045**

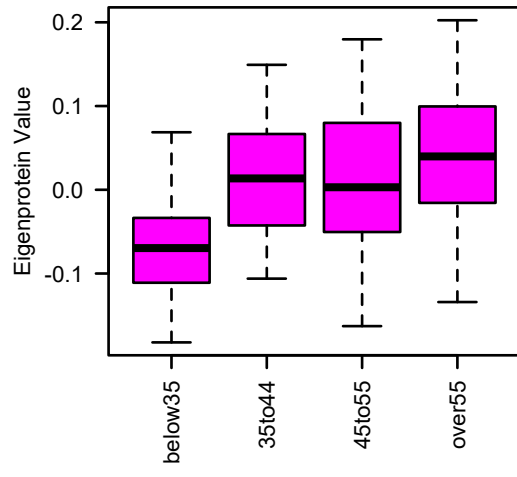

**M9 magenta.Aging (Synthetic)**  
**K-W ANOVA p: 0.0055**

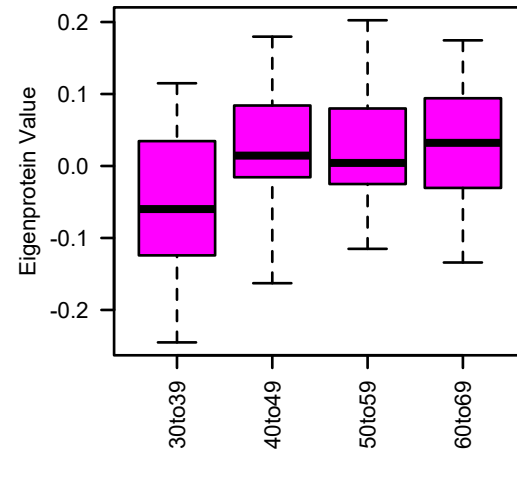

**bicor=0.29, p=0.008**  
**cor=0.3, p=0.0056**

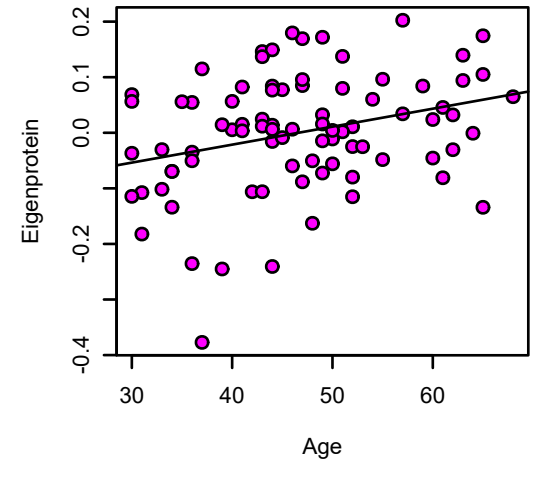

**Supplementary Figure 9. Effect of Aging on AD Network Modules.** The top 20% of proteins by kME value in each AD brain protein network module was used to create a synthetic eigenprotein, which was then measured by age grouping and correlated with age in the aging cohort from the Baltimore coroner's office ( $n=84$  independent case samples). The first boxplot for each module is the AD network eigenprotein by case status, given as reference for the second and third boxplots, which is the synthetic eigenprotein in the BLSA precuneus cohort measured in two different age groupings (age below 35,  $n=11$ ; age 35-44,  $n=27$ ; age 45-55,  $n=30$ ; age over 55,  $n=16$ ; age 30-39,  $n=20$ ; age 40-49,  $n=34$ ; age 50-59,  $n=17$ ; age 60-69,  $n=13$ ;). Synthetic eigenproteins were also correlated directly with age, using both Pearson correlation ( $cor$ ) and biweight midcorrelation ( $bicor$ ), which is more robust to outliers. Synthetic eigenprotein differences by case status were assessed by Kruskal-Wallis (K-W) one-way ANOVA. Statistical significance at  $p < 0.05$  is highlighted in red. Boxplots represent the median, 25<sup>th</sup>, and 75<sup>th</sup> percentiles, and whiskers represent measurements to the 5<sup>th</sup> and 95<sup>th</sup> percentiles.

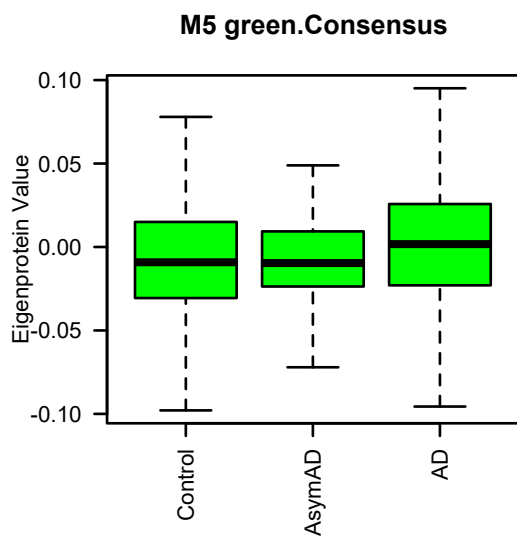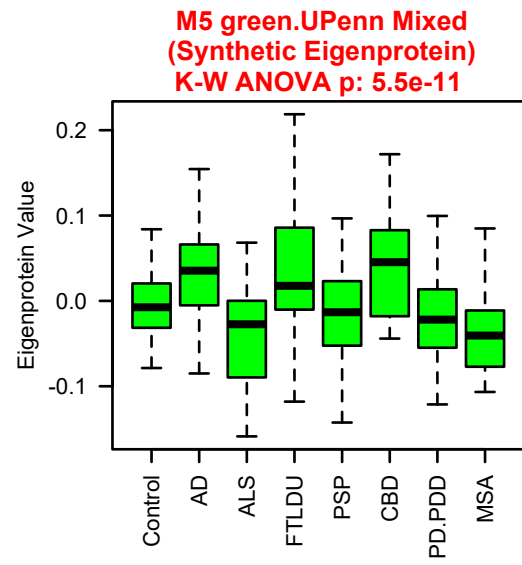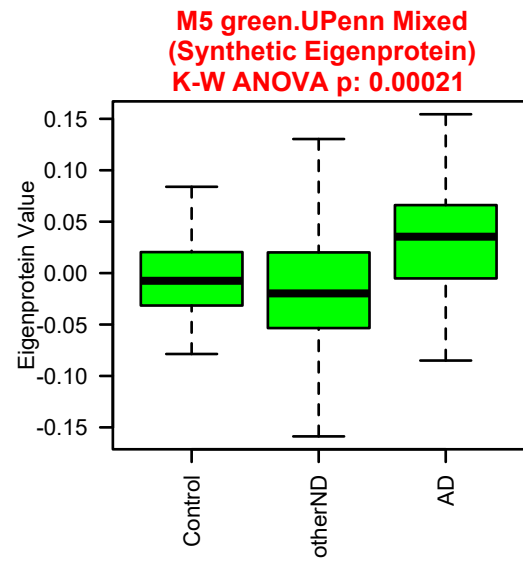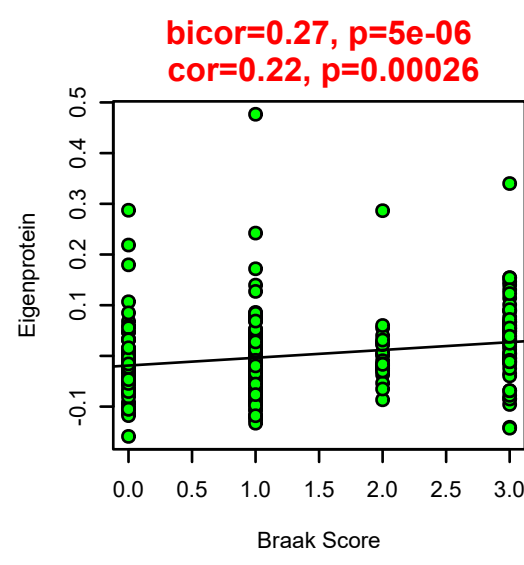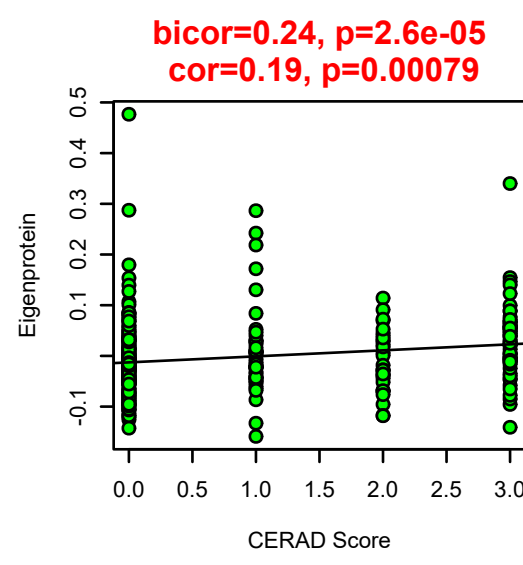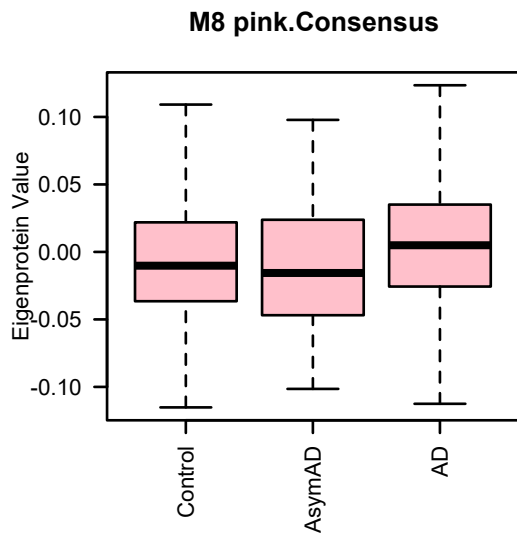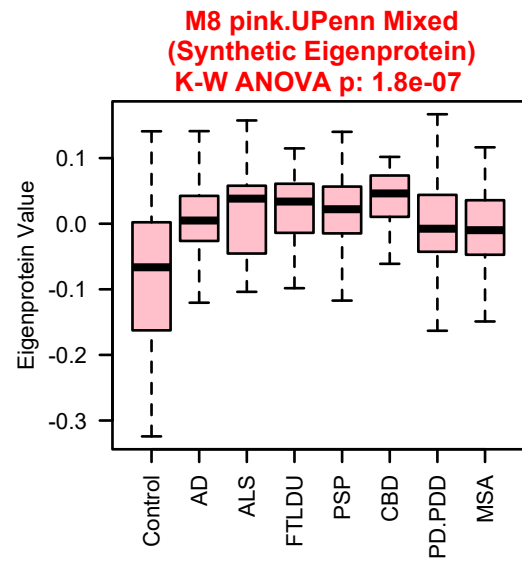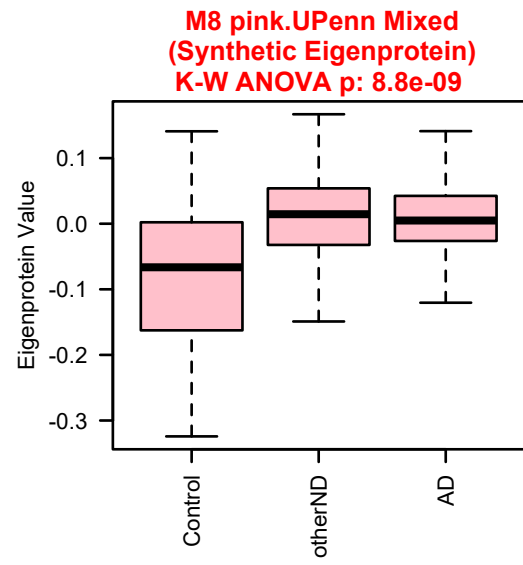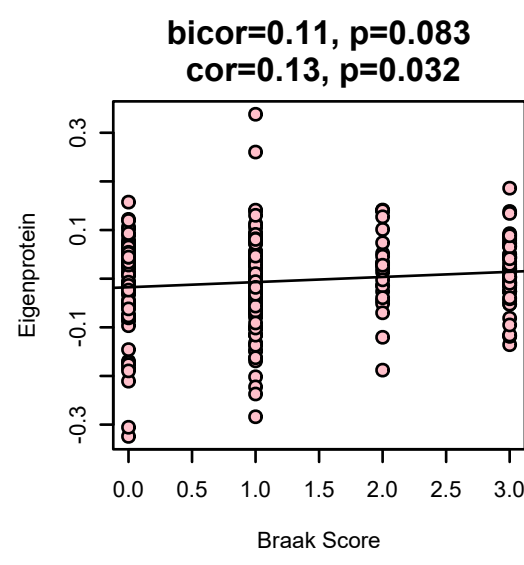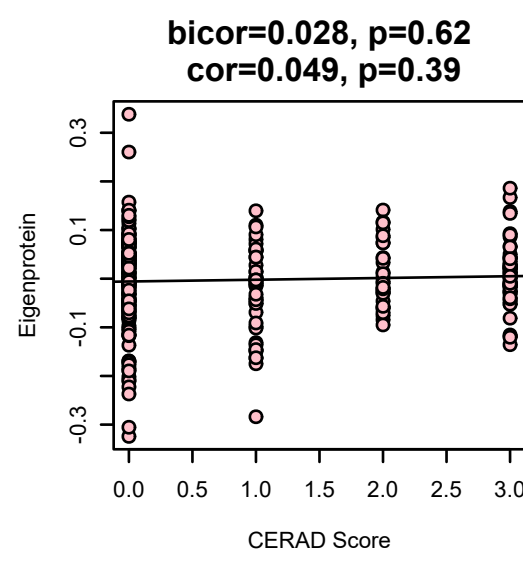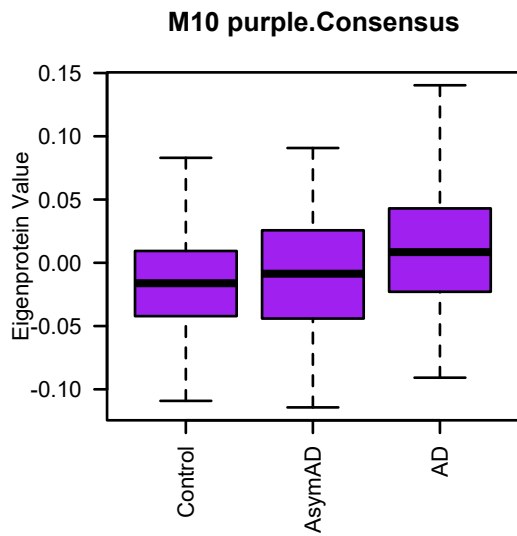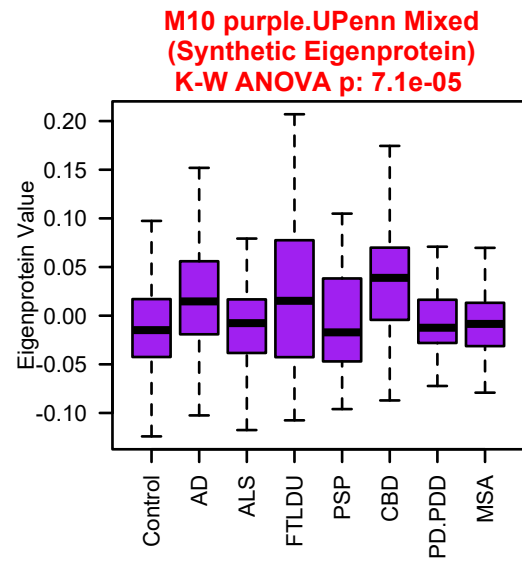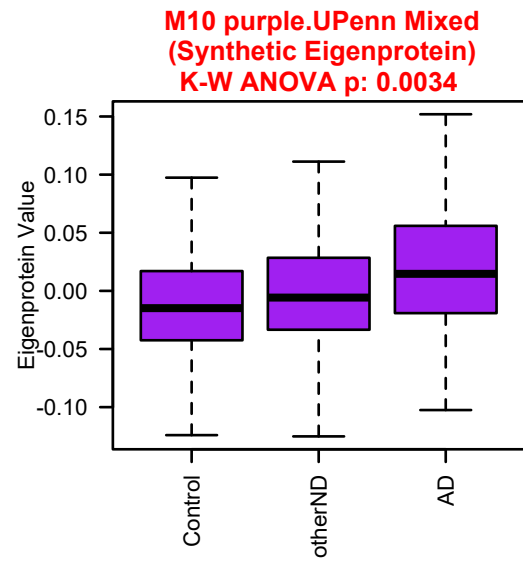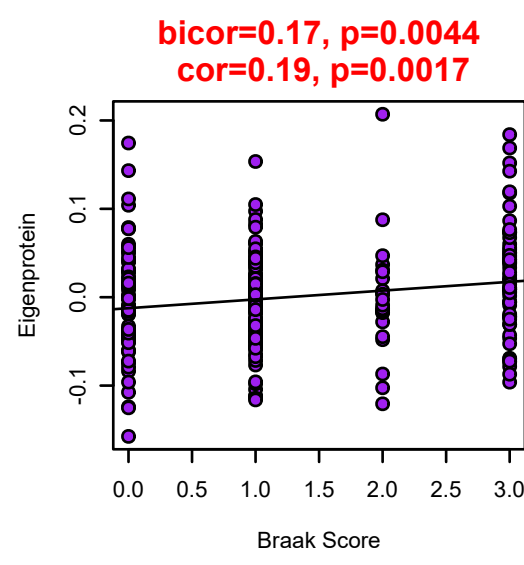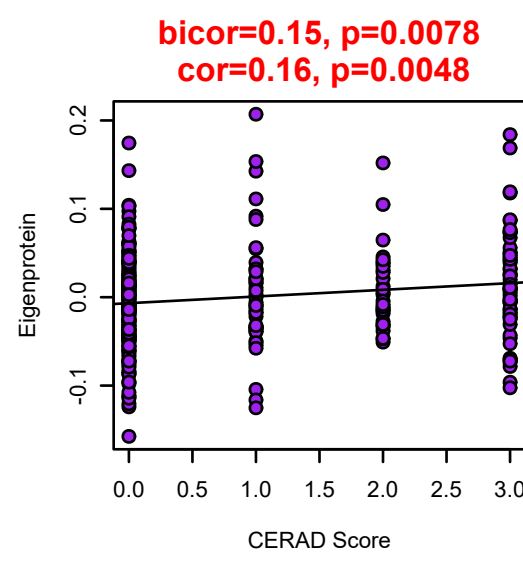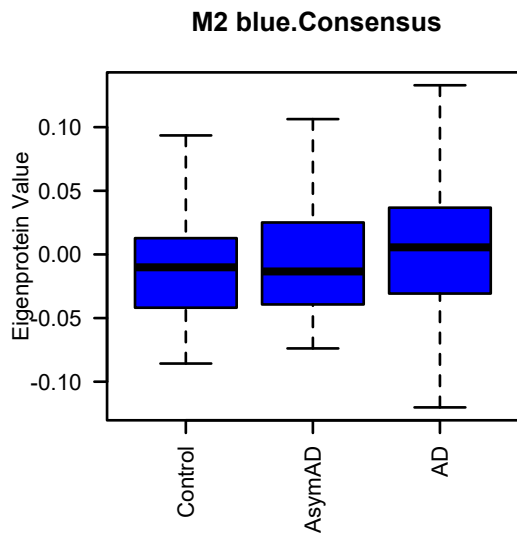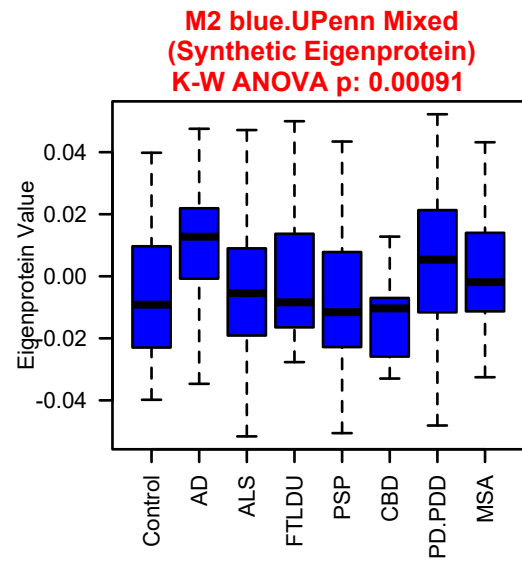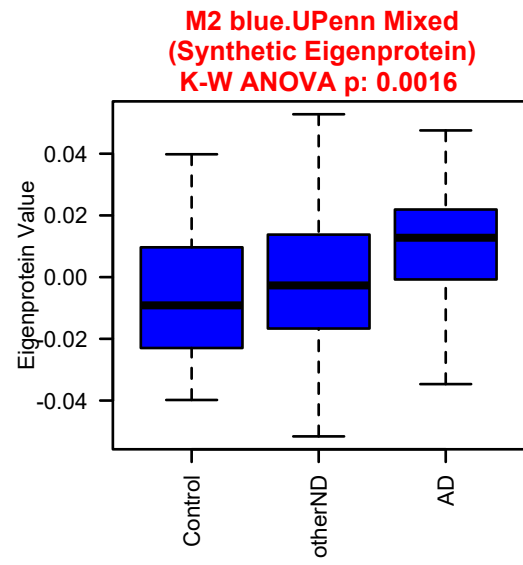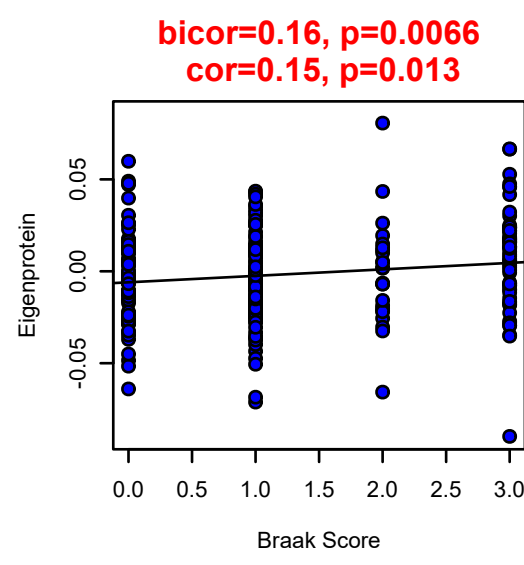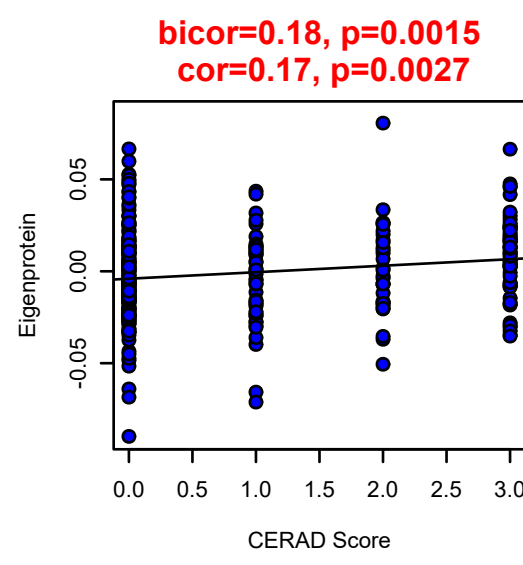

**M4 yellow.Consensus**

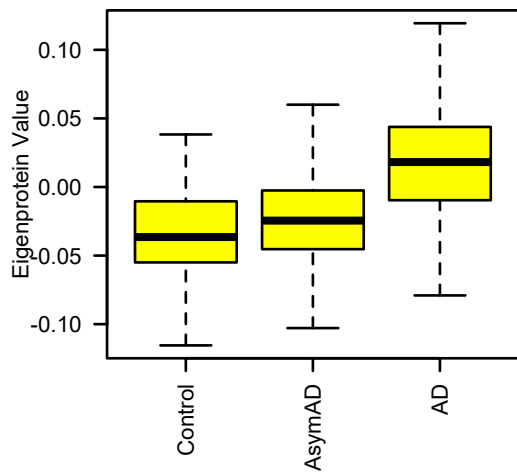

**M4 yellow.UPenn Mixed (Synthetic Eigenprotein)**  
K-W ANOVA p: 4.3e-29

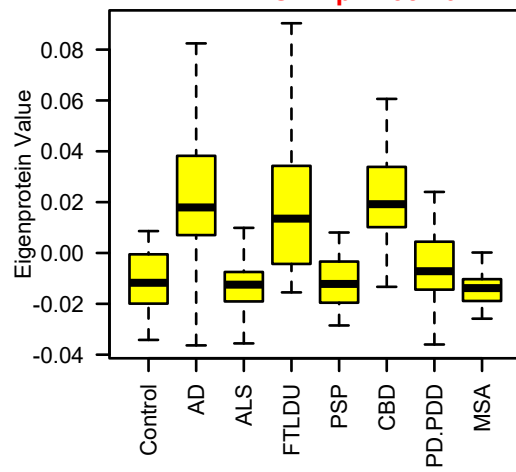

**M4 yellow.UPenn Mixed (Synthetic Eigenprotein)**  
K-W ANOVA p: 6.6e-12

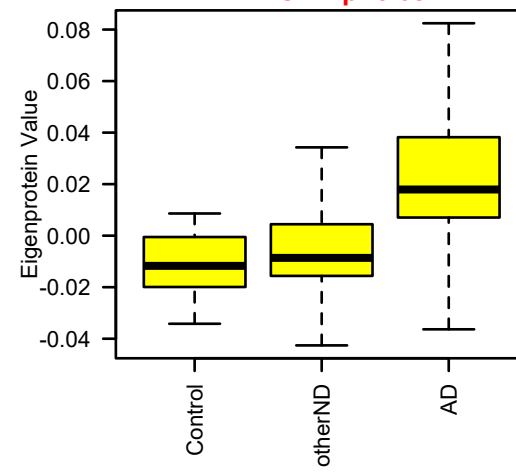

**bicor=0.42, p=5.4e-13**  
**cor=0.36, p=1e-09**

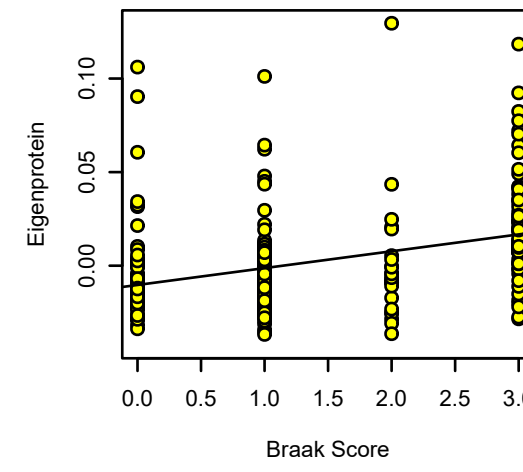

**bicor=0.36, p=4.9e-11**  
**cor=0.31, p=2.6e-08**

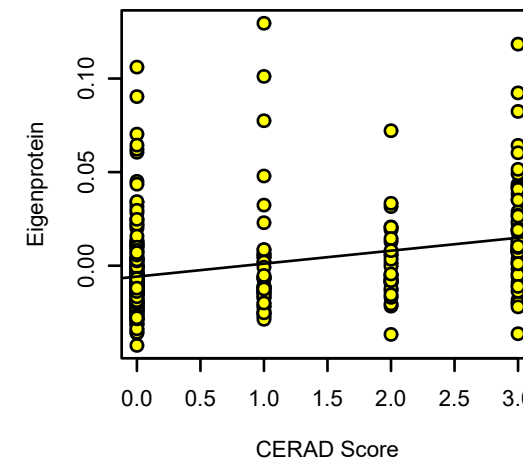

**M11 greenyellow.Consensus**

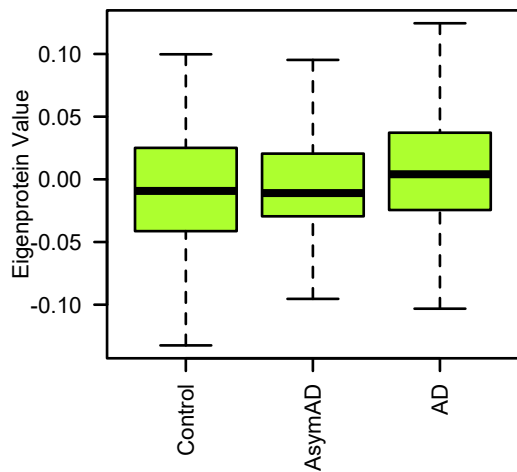

**M11 greenyellow.UPenn Mixed (Synthetic Eigenprotein)**  
K-W ANOVA p: 0.42

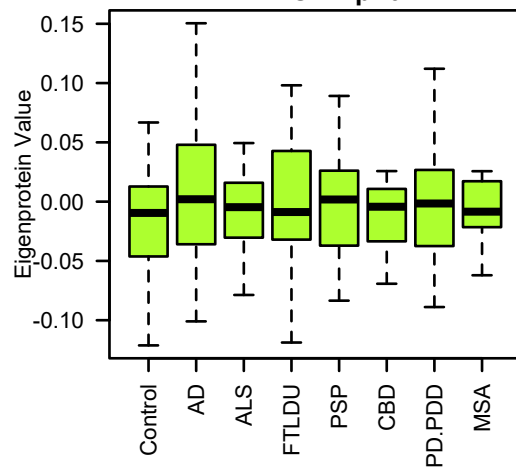

**M11 greenyellow.UPenn Mixed (Synthetic Eigenprotein)**  
K-W ANOVA p: 0.24

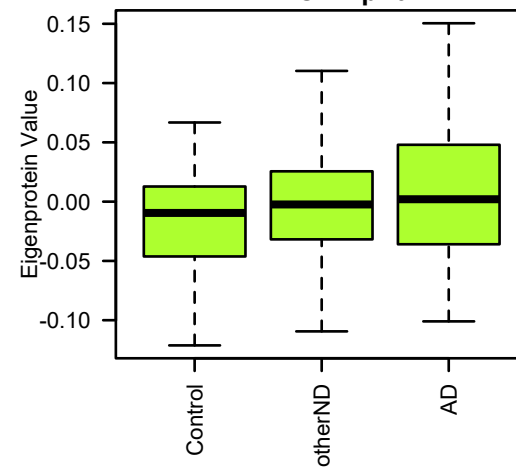

**bicor=0.025, p=0.68**  
**cor=0.0026, p=0.97**

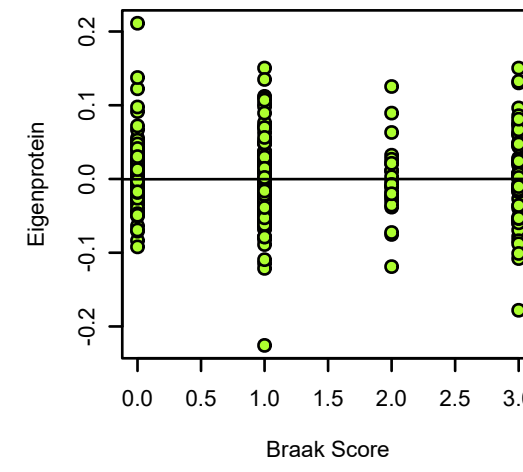

**bicor=0.059, p=0.3**  
**cor=0.03, p=0.6**

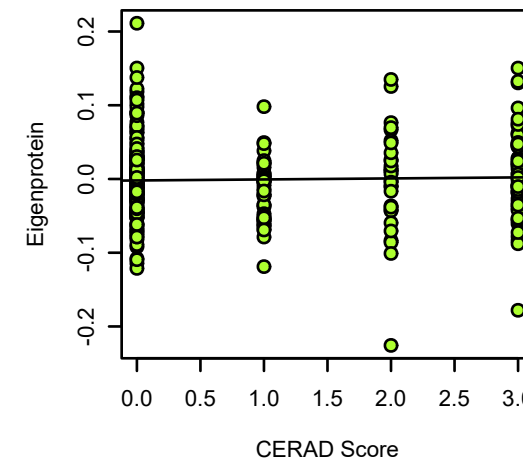

**M13 salmon.Consensus**

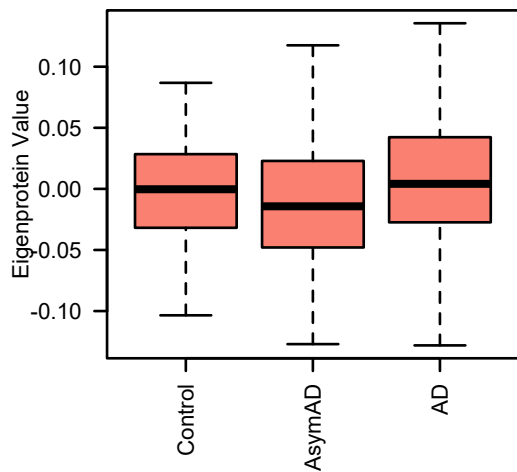

**M13 salmon.UPenn Mixed (Synthetic Eigenprotein)**  
K-W ANOVA p: 0.021

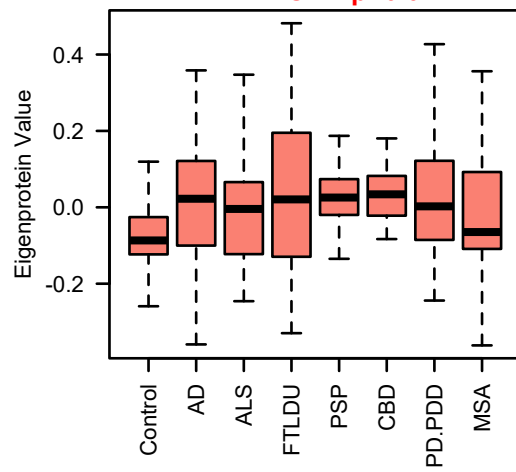

**M13 salmon.UPenn Mixed (Synthetic Eigenprotein)**  
K-W ANOVA p: 0.0028

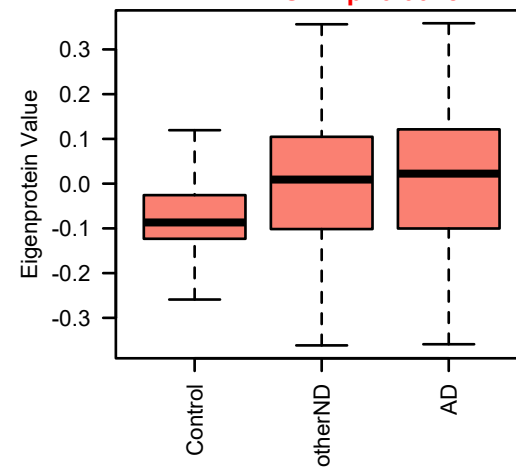

**bicor=0.091, p=0.14**  
**cor=0.058, p=0.34**

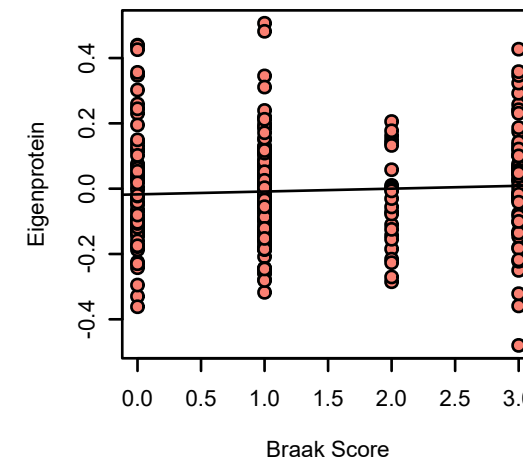

**bicor=-0.001, p=0.99**  
**cor=-0.013, p=0.82**

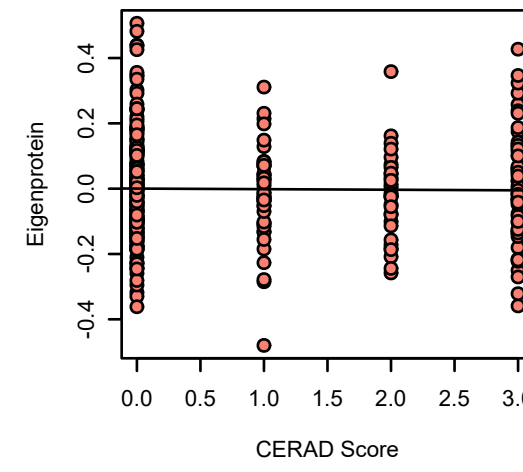

**M3 brown.Consensus**

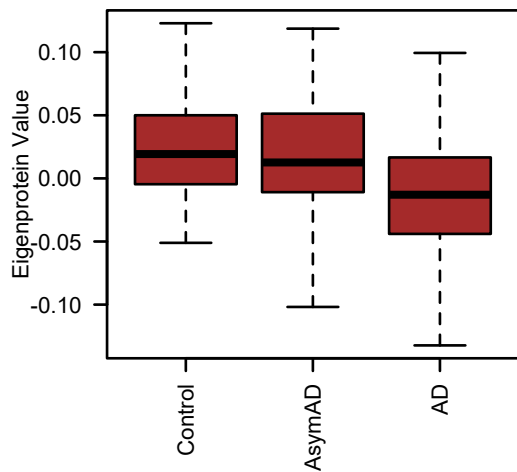

**M3 brown.UPenn Mixed (Synthetic Eigenprotein)**  
K-W ANOVA p: 3e-15

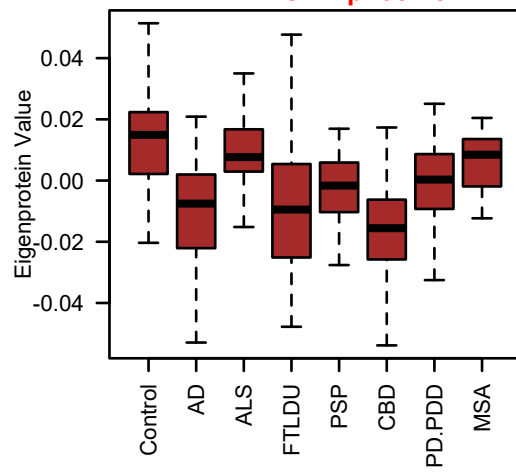

**M3 brown.UPenn Mixed (Synthetic Eigenprotein)**  
K-W ANOVA p: 1.9e-08

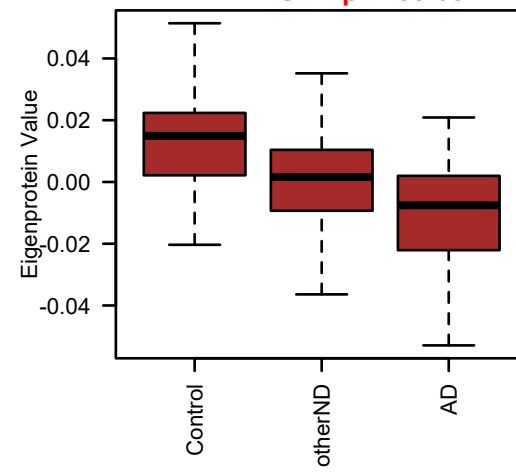

**bicor=-0.33, p=1.8e-08**  
**cor=-0.3, p=4.8e-07**

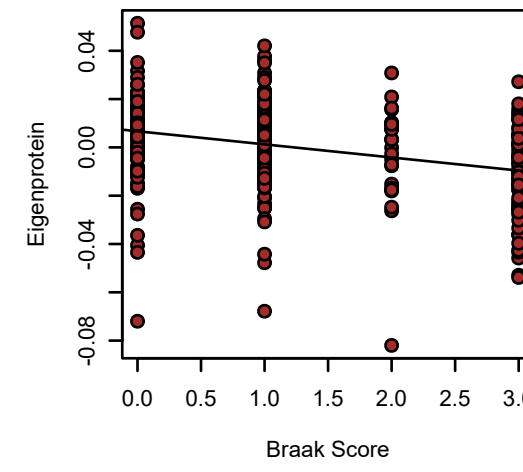

**bicor=-0.29, p=3.2e-07**  
**cor=-0.25, p=8.7e-06**

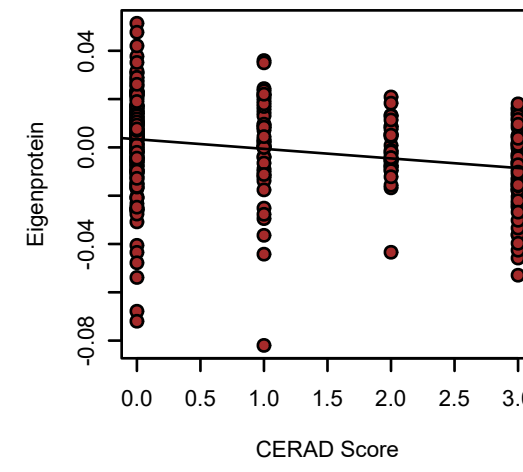

**M6 red.Consensus**

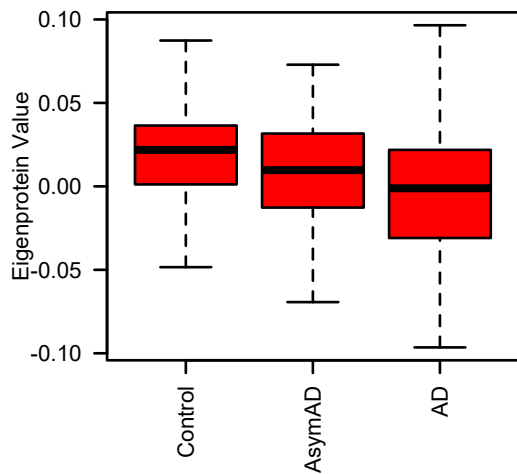

**M6 red.UPenn Mixed (Synthetic Eigenprotein)**  
K-W ANOVA p: 8.6e-07

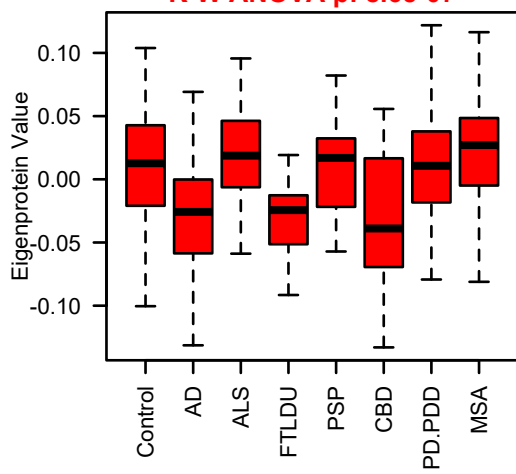

**M6 red.UPenn Mixed (Synthetic Eigenprotein)**  
K-W ANOVA p: 0.00035

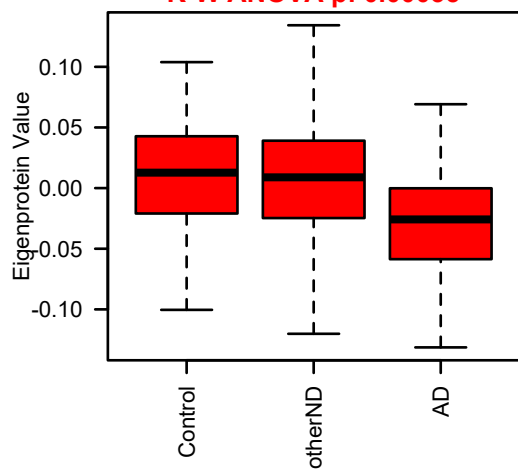

**bicor=-0.25, p=4.3e-05**  
**cor=-0.25, p=3.1e-05**

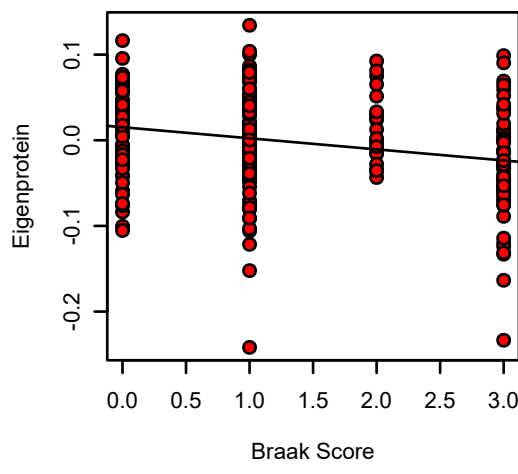

**bicor=-0.11, p=0.062**  
**cor=-0.11, p=0.053**

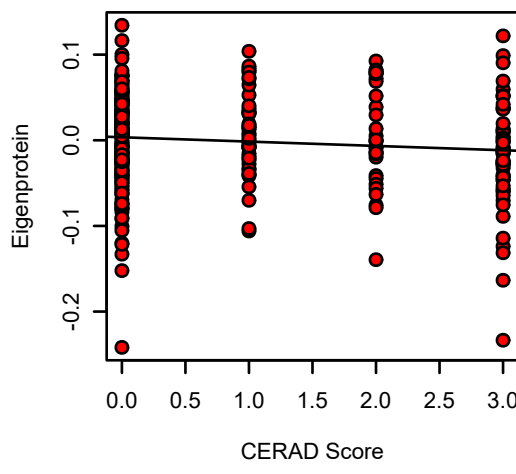

**M1 turquoise.Consensus**

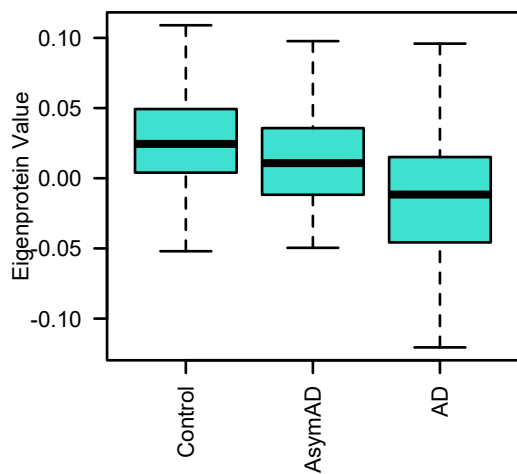

**M1 turquoise.UPenn Mixed (Synthetic Eigenprotein)**  
K-W ANOVA p: 8.5e-17

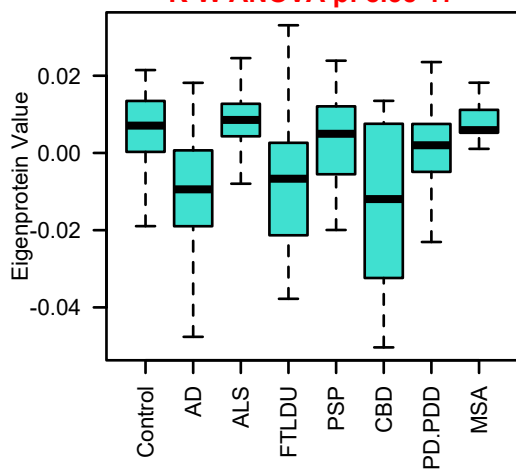

**M1 turquoise.UPenn Mixed (Synthetic Eigenprotein)**  
K-W ANOVA p: 6e-10

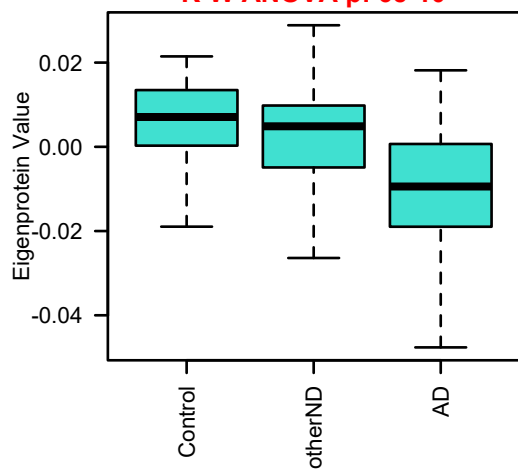

**bicor=-0.39, p=2.9e-11**  
**cor=-0.38, p=9.7e-11**

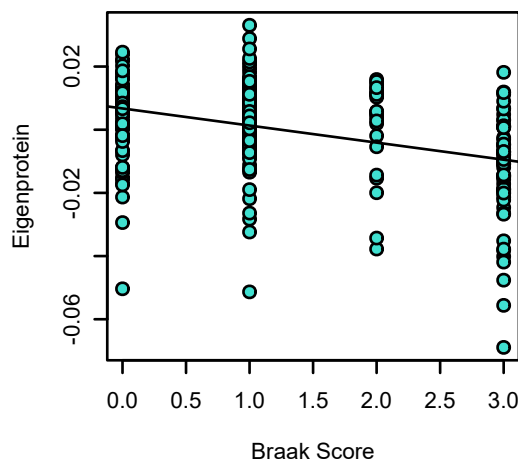

**bicor=-0.28, p=6.9e-07**  
**cor=-0.28, p=5.7e-07**

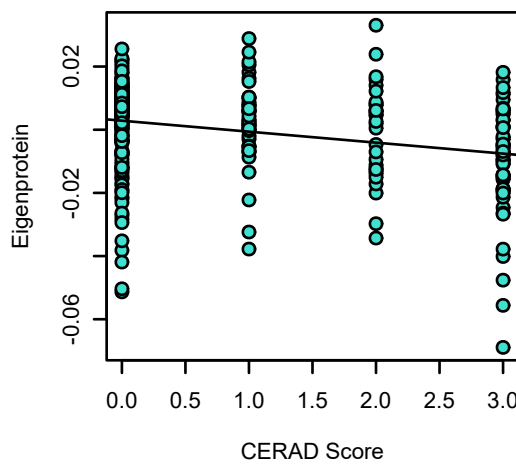

**M12 tan.Consensus**

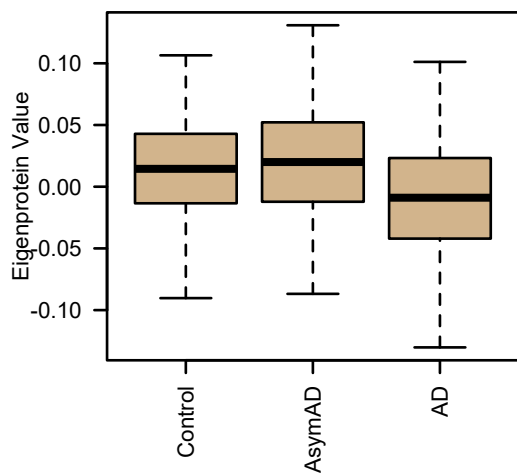

**M12 tan.UPenn Mixed (Synthetic Eigenprotein)**  
K-W ANOVA p: 1.4e-06

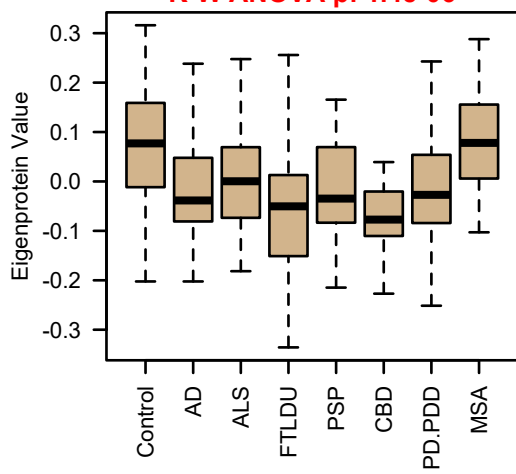

**M12 tan.UPenn Mixed (Synthetic Eigenprotein)**  
K-W ANOVA p: 1e-04

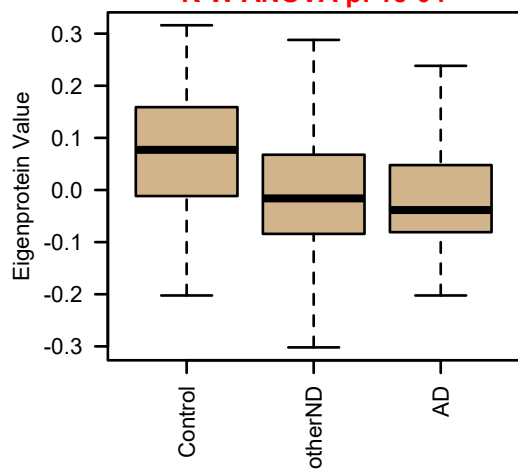

**bicor=-0.12, p=0.056**  
**cor=-0.12, p=0.048**

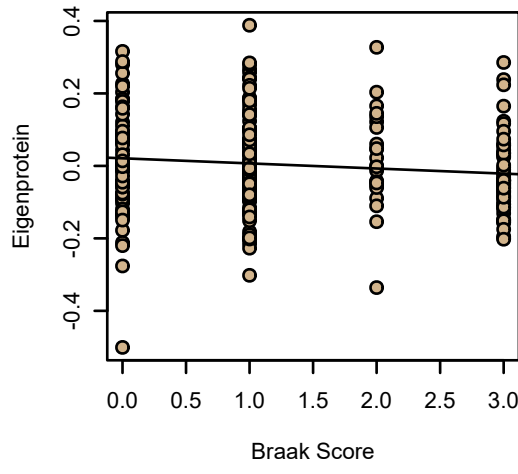

**bicor=-0.15, p=0.0073**  
**cor=-0.15, p=0.0083**

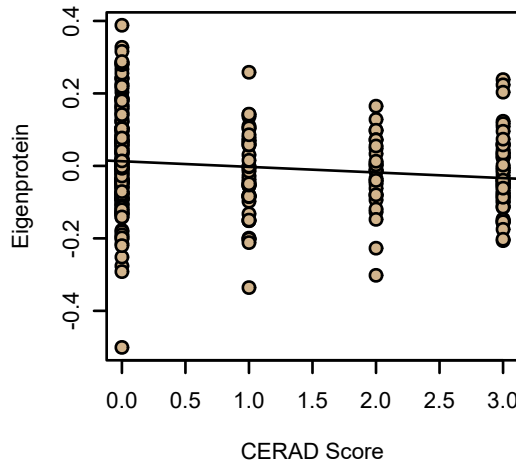

**M7 black.Consensus**

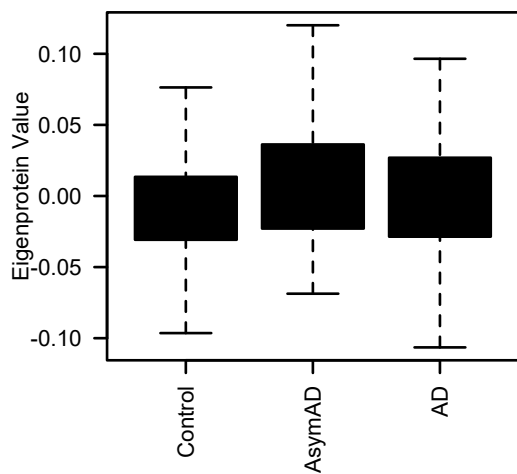

**M7 black.UPenn Mixed (Synthetic Eigenprotein)**  
K-W ANOVA p: 0.099

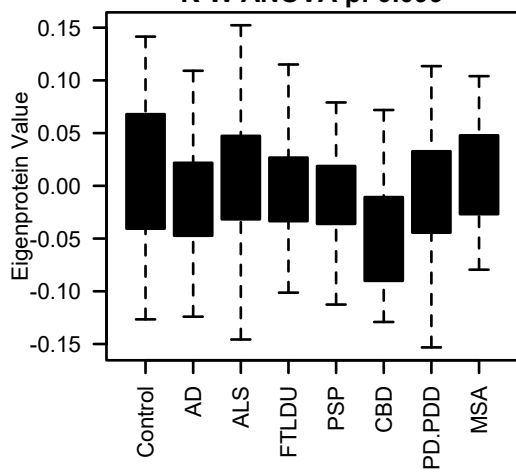

**M7 black.UPenn Mixed (Synthetic Eigenprotein)**  
K-W ANOVA p: 0.18

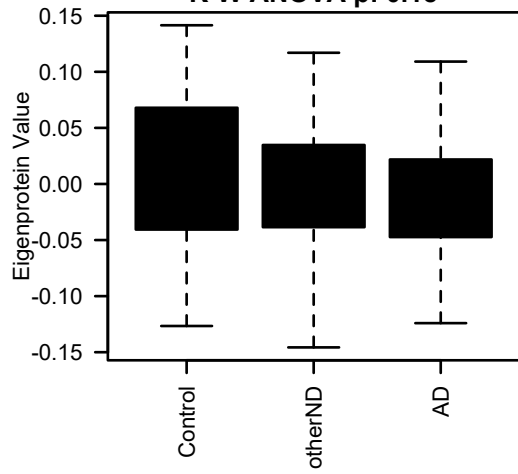

**bicor=-0.08, p=0.19**  
**cor=-0.075, p=0.22**

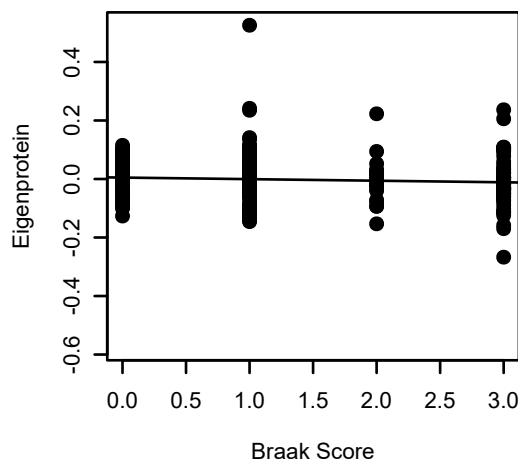

**bicor=-0.072, p=0.21**  
**cor=-0.054, p=0.34**

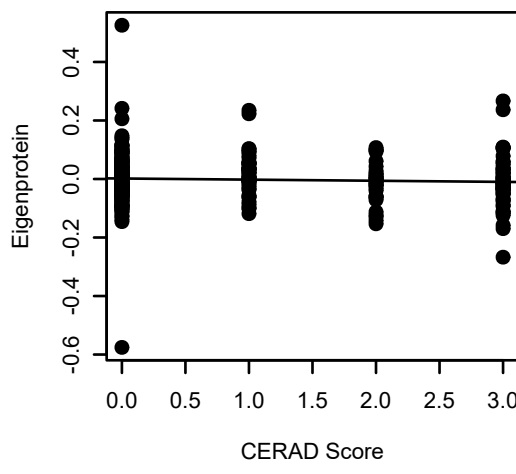



**M9 magenta.Consensus**

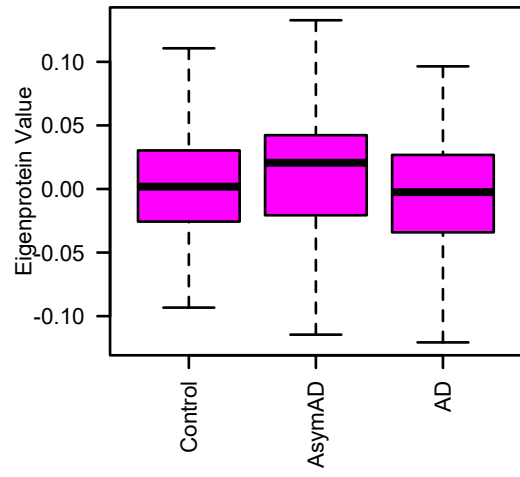

**M9 magenta.UPenn Mixed  
(Synthetic Eigenprotein)  
K-W ANOVA p: 0.017**

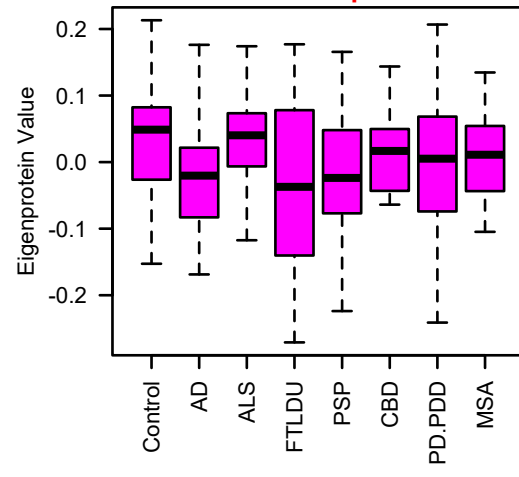

**M9 magenta.UPenn Mixed  
(Synthetic Eigenprotein)  
K-W ANOVA p: 0.073**

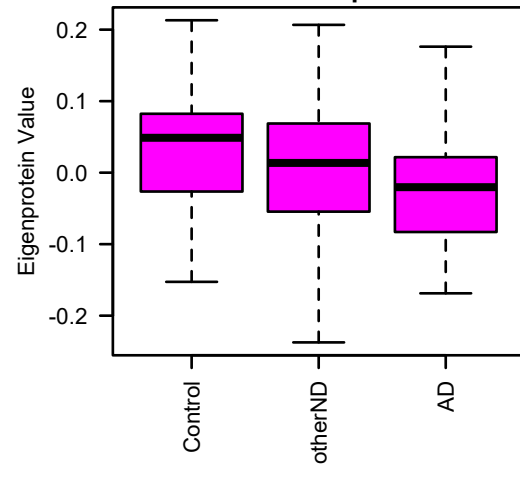

**bicor=-0.17, p=0.0055  
cor=-0.12, p=0.048**

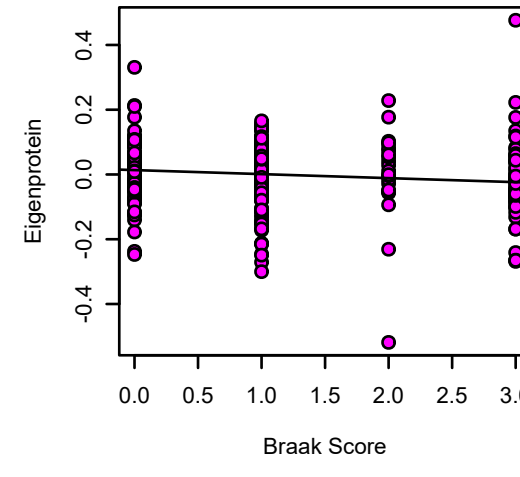

**bicor=-0.09, p=0.11  
cor=-0.035, p=0.54**

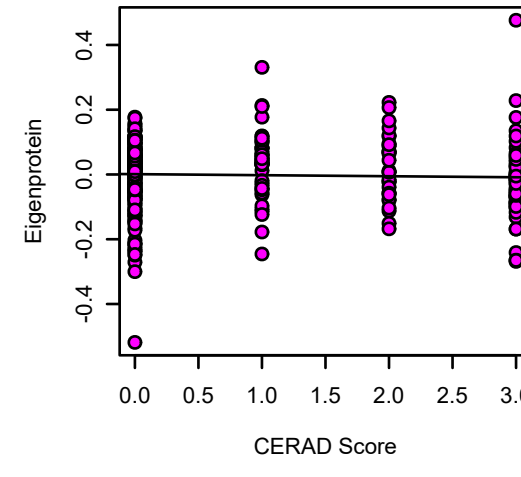

**Supplementary Figure 10. AD Protein Network Module Changes in Other Neurodegenerative Diseases.** The top 20% of proteins by kME value in each AD brain protein network module was used to create a synthetic eigenprotein, which was then measured in different neurodegenerative diseases in the UPenn cohort ( $n=330$  independent case samples after network connectivity outlier removal). The first boxplot for each module is the AD network eigenprotein by case status, given as reference for the second and third boxplots (control  $n=46$ , AD  $n=49$ , amyotrophic lateral sclerosis (ALS)  $n=59$ , frontotemporal lobar degeneration with TAR DNA-binding protein 43 inclusions (FTLD-TDP)  $n=29$ , progressive supranuclear palsy (PSP)  $n=27$ , corticobasal degeneration (CBD)  $n=17$ , Parkinson's disease and Parkinson's disease dementia (PD/PDD)  $n=80$ , and multiple system atrophy (MSA)  $n=23$ ). Other neurodegenerative diseases (otherND) include these non-AD diseases. Synthetic eigenproteins were also correlated with CERAD and Braak scores, using both Pearson correlation ( $cor$ ) and biweight midcorrelation ( $bicor$ ), which is more robust to outliers. Synthetic eigenprotein differences by case status were assessed by Kruskal-Wallis (K-W) one-way ANOVA. Differences between AD and other case groups were assessed by two-sided Dunnett's test and are provided in **Supplementary Table 4**. Statistical significance at  $p < 0.05$  is highlighted in red. Boxplots represent the median, 25<sup>th</sup>, and 75<sup>th</sup> percentiles, and whiskers represent measurements to the 5<sup>th</sup> and 95<sup>th</sup> percentiles.

**HDGFRP3 UPenn Mixed PRM**  
**M10 purple MEGA module member**  
**K-W ANOVA p: 0.01**

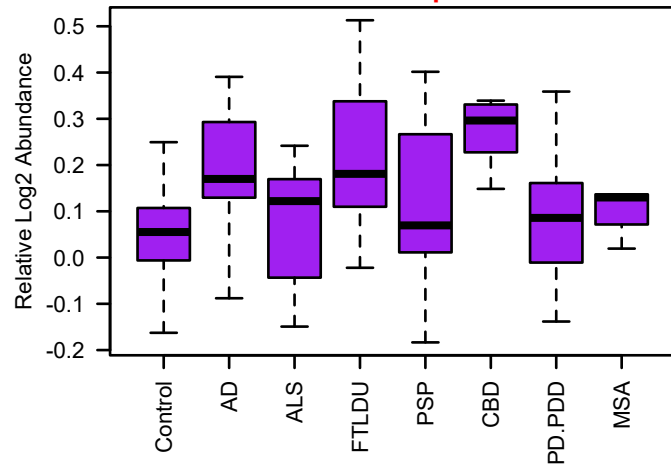

**HDGFRP3 UPenn Mixed PRM**  
**K-W ANOVA p: 0.02**

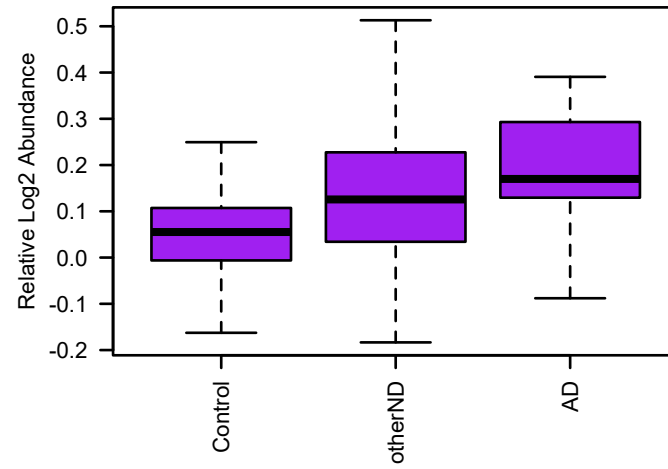

**bicor=0.26, p=0.017**  
**cor=0.28, p=0.0099**

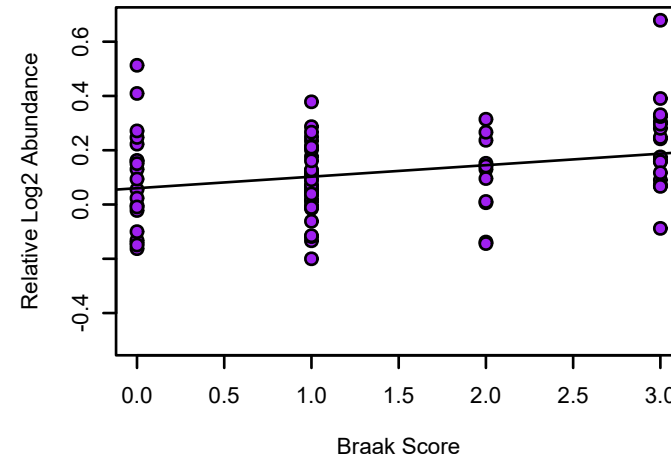

**bicor=0.15, p=0.14**  
**cor=0.18, p=0.073**

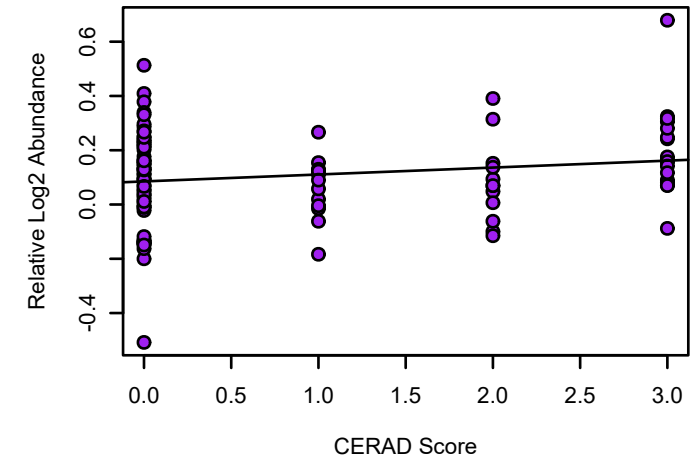

**RPS9 UPenn Mixed PRM**  
**M7 black MEGA module member**  
**K-W ANOVA p: 0.19**

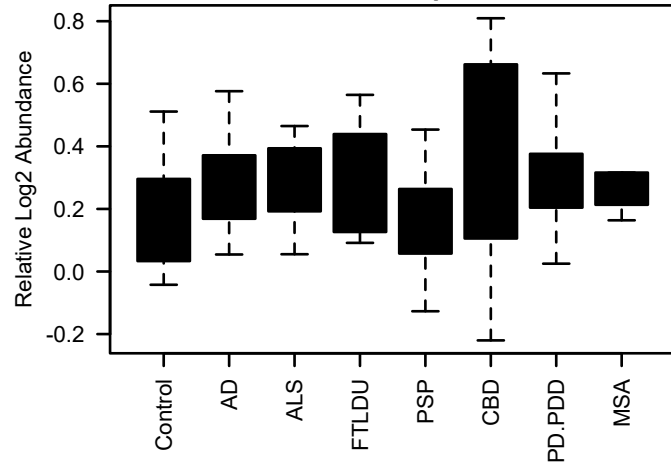

**RPS9 UPenn Mixed PRM**  
**K-W ANOVA p: 0.47**

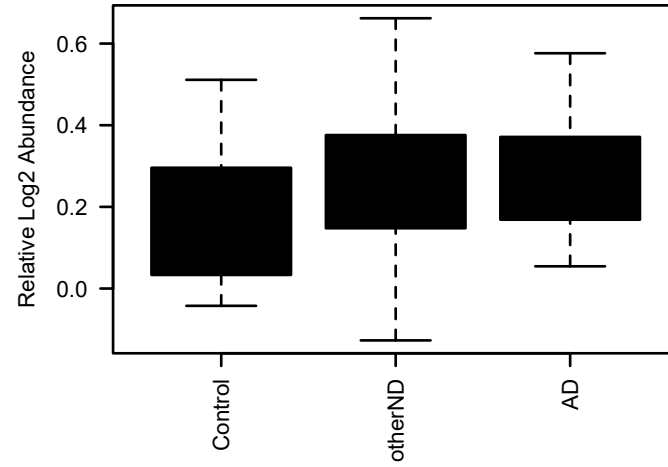

**bicor=0.075, p=0.5**  
**cor=0.11, p=0.32**

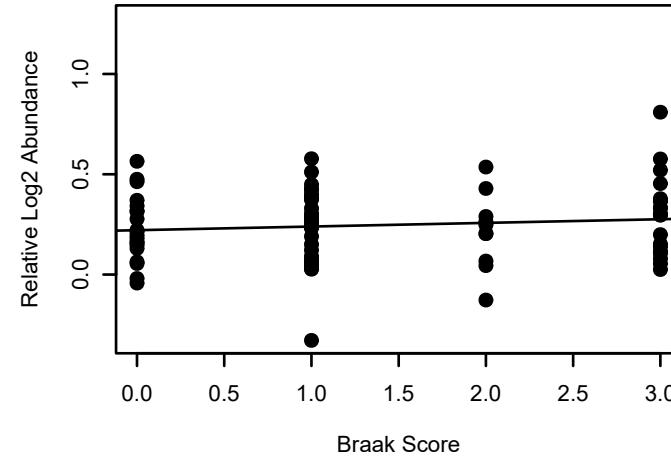

**bicor=0.084, p=0.41**  
**cor=0.054, p=0.59**

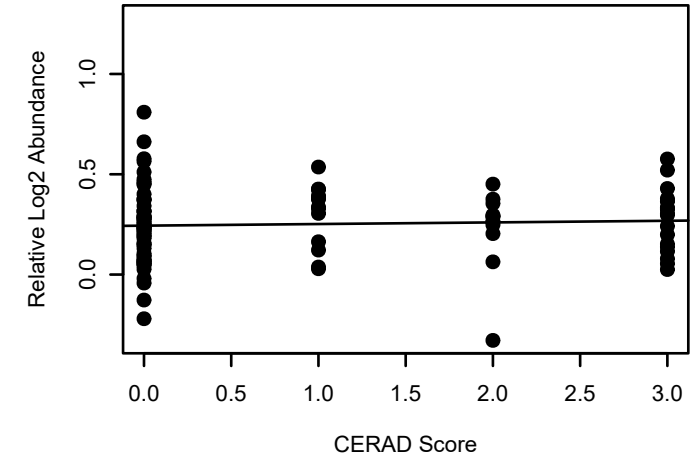

**KHSRP UPenn Mixed PRM**  
**M10 purple MEGA module member**  
**K-W ANOVA p: 0.054**

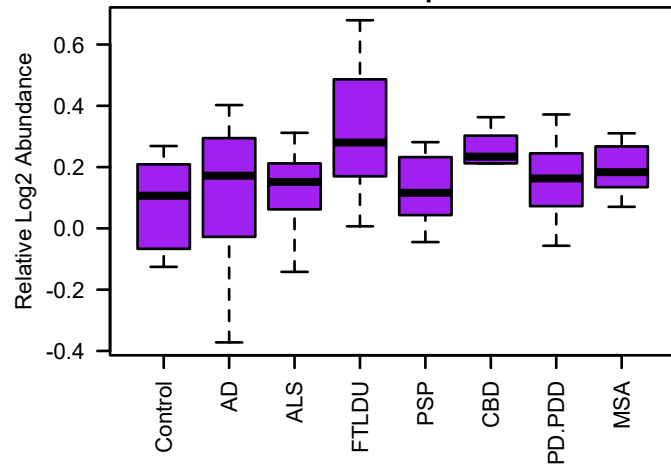

**KHSRP UPenn Mixed PRM**  
**K-W ANOVA p: 0.37**

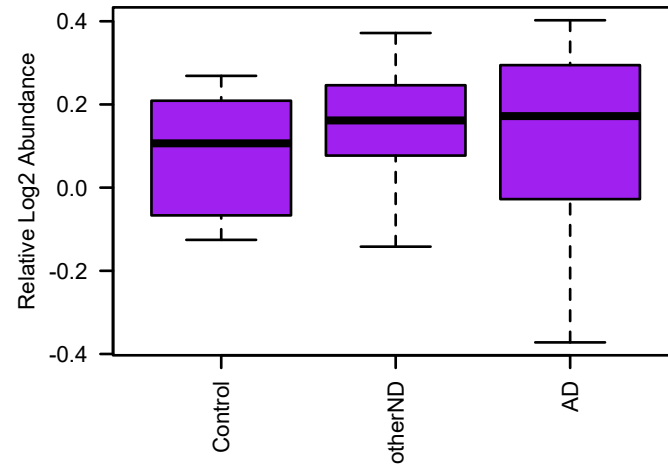

**bicor=0.034, p=0.76**  
**cor=0.09, p=0.42**

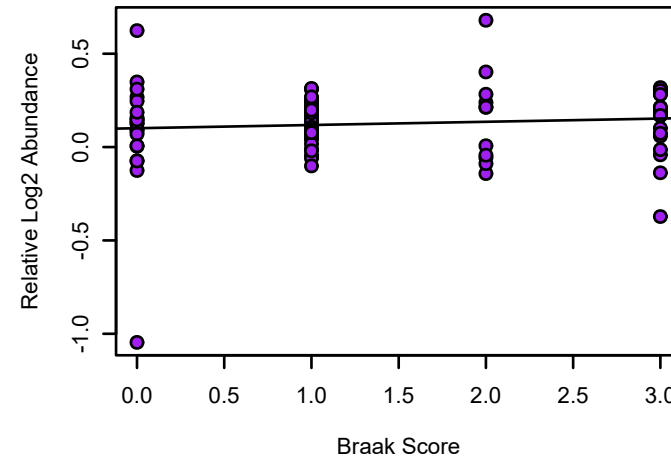

**bicor=-0.027, p=0.79**  
**cor=-0.0026, p=0.98**

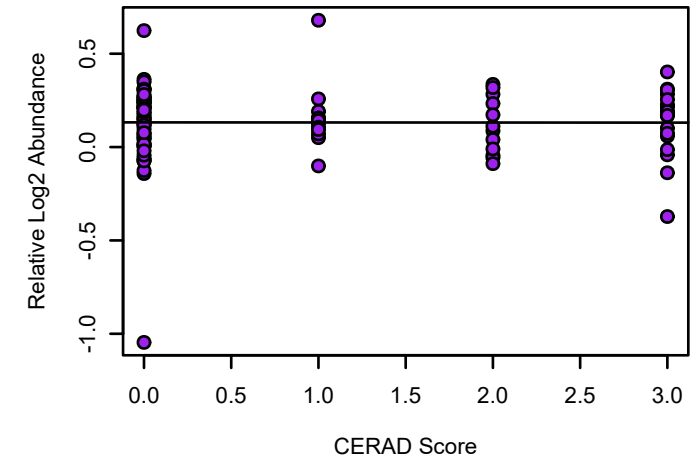

**LLGL1 UPenn Mixed PRM**  
**M2 blue MEGA module member**  
**K-W ANOVA p: 3.9e-05**

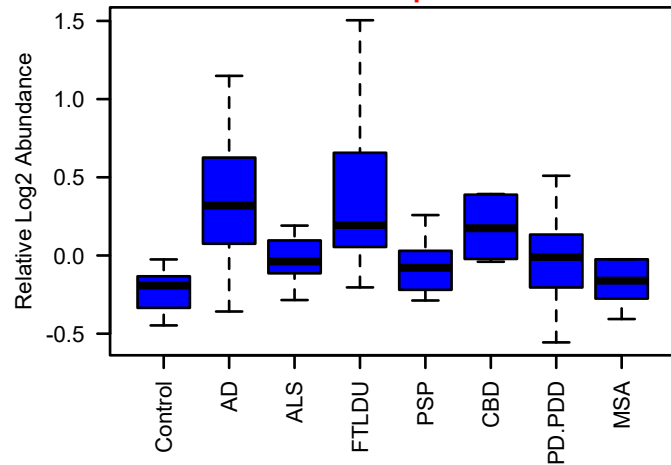

**LLGL1 UPenn Mixed PRM**  
**K-W ANOVA p: 3.3e-05**

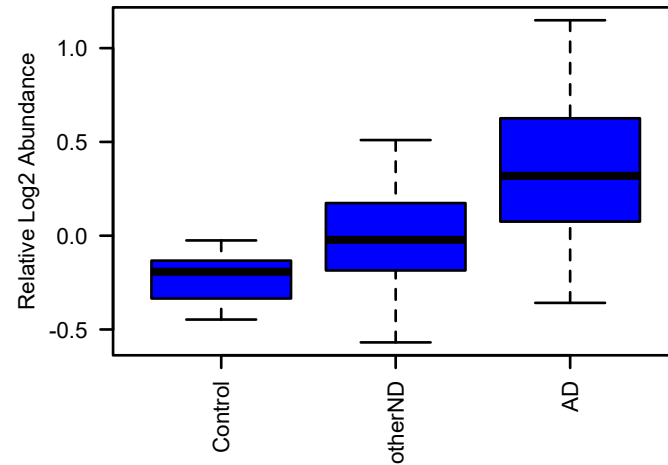

**bicor=0.44, p=2.3e-05**  
**cor=0.41, p=0.00011**

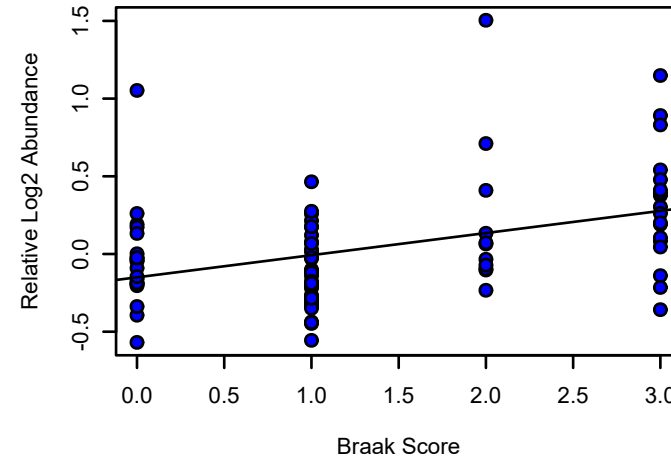

**bicor=0.36, p=0.00027**  
**cor=0.34, p=0.00054**

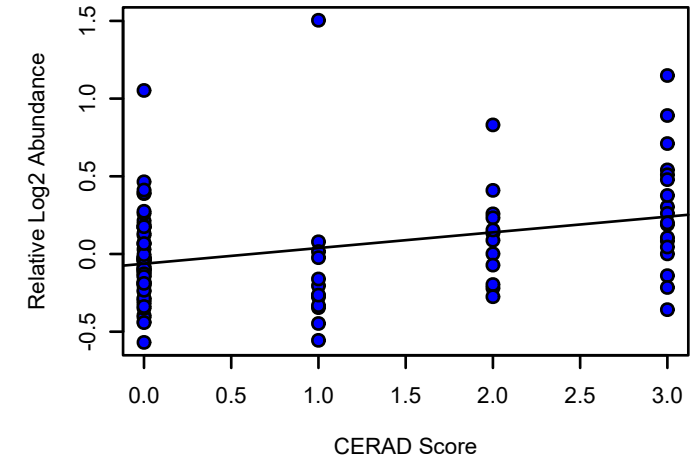

**SYN2 UPenn Mixed PRM**  
**M1 turquoise MEGA module member**  
**K-W ANOVA p: 0.015**

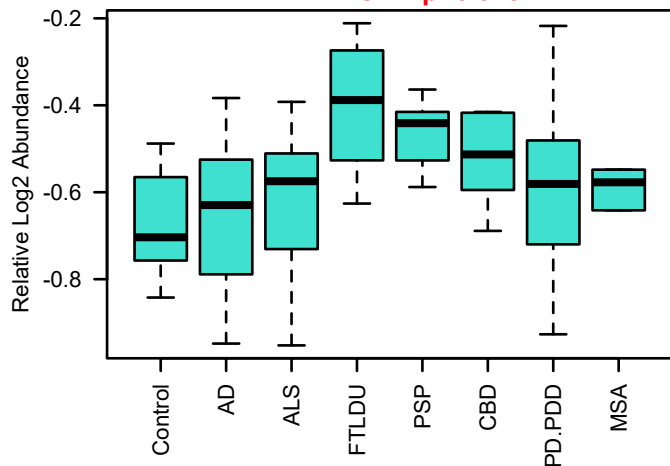

**SYN2 UPenn Mixed PRM**  
**K-W ANOVA p: 0.0095**

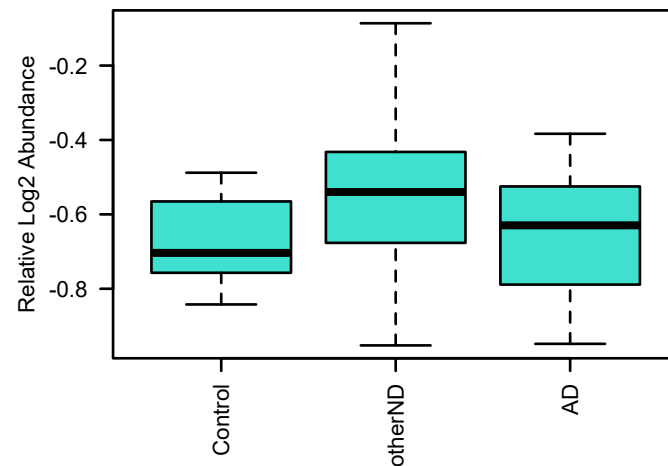

**bicor=-0.096, p=0.39**  
**cor=-0.072, p=0.52**

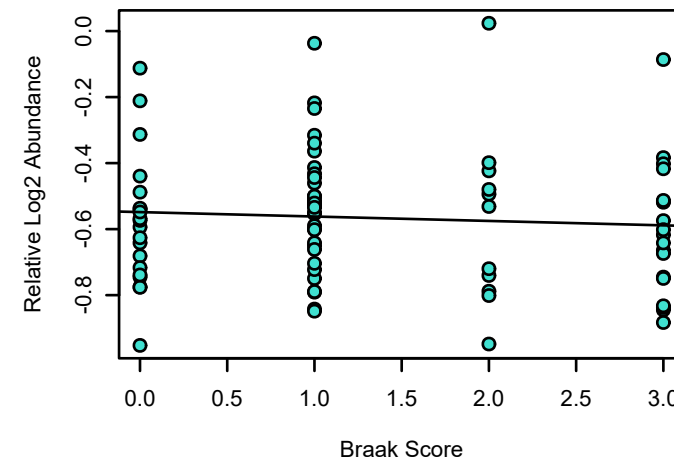

**bicor=-0.088, p=0.39**  
**cor=-0.074, p=0.46**

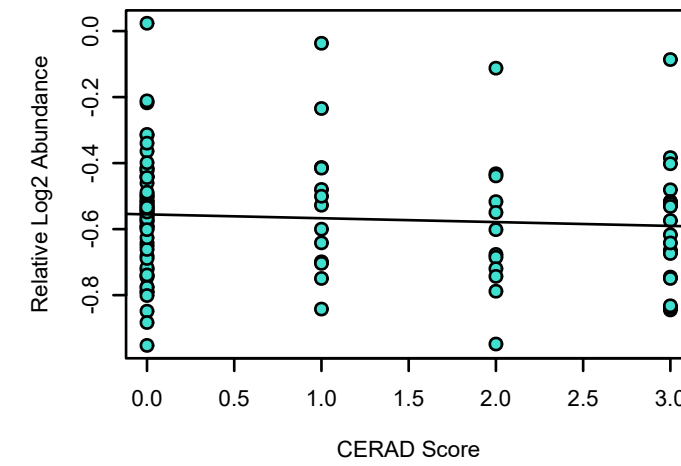

**NDUFA10 UPenn Mixed PRM**  
**M3 brown MEGA module member**  
**K-W ANOVA p: 0.00018**

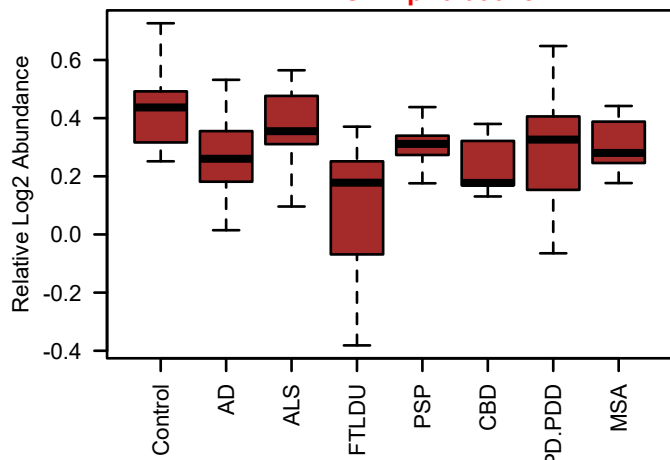

**NDUFA10 UPenn Mixed PRM**  
**K-W ANOVA p: 0.0065**

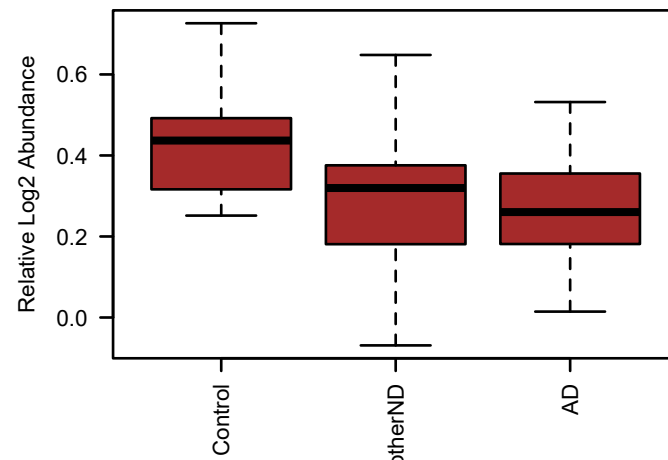

**bicor=-0.19, p=0.082**  
**cor=-0.17, p=0.12**

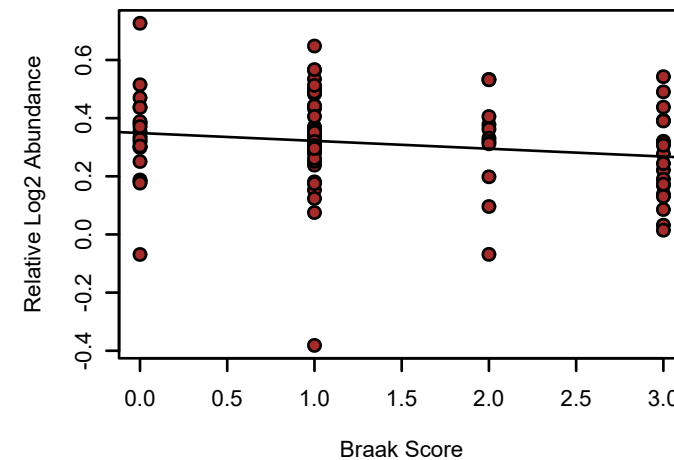

**bicor=-0.21, p=0.033**  
**cor=-0.19, p=0.058**

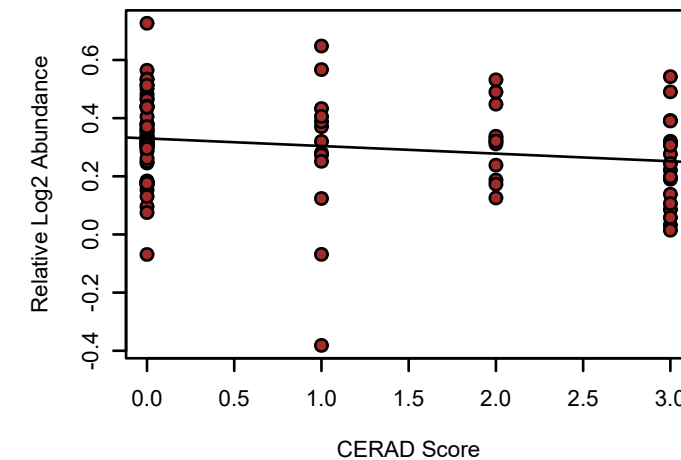

**AP2M1 UPenn Mixed PRM**  
**M1 turquoise MEGA module member**  
**K-W ANOVA p: 0.00079**

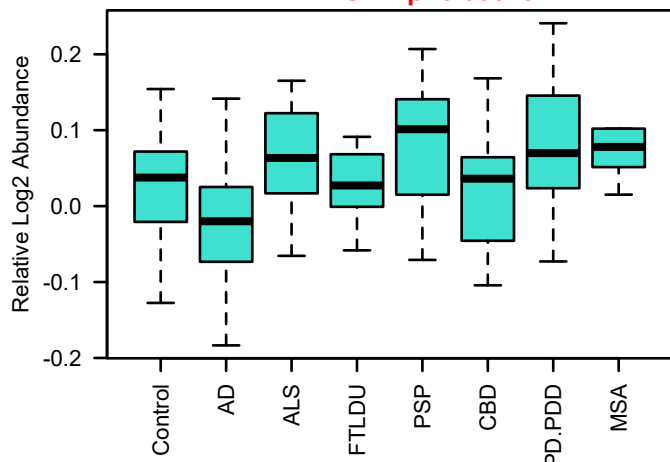

**AP2M1 UPenn Mixed PRM**  
**K-W ANOVA p: 5e-05**

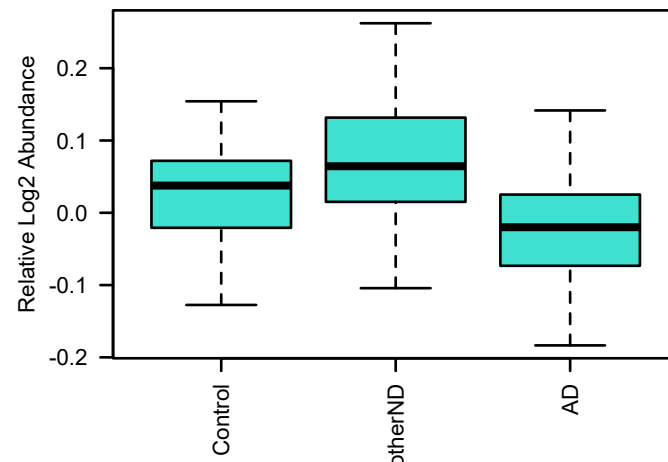

**bicor=-0.16, p=0.14**  
**cor=-0.19, p=0.083**

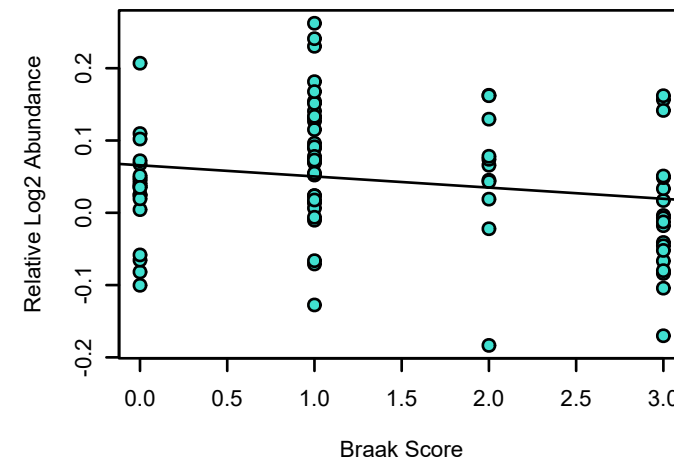

**bicor=-0.21, p=0.037**  
**cor=-0.21, p=0.036**

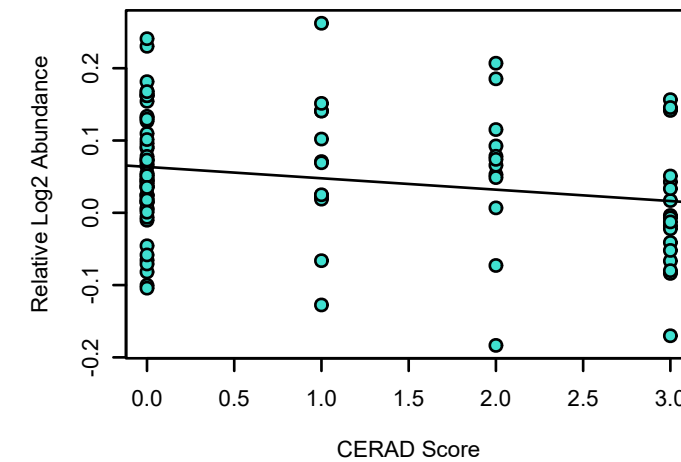

**HNRNPM UPenn Mixed PRM**  
**M10 purple MEGA module member**  
**K-W ANOVA p: 4.7e-05**

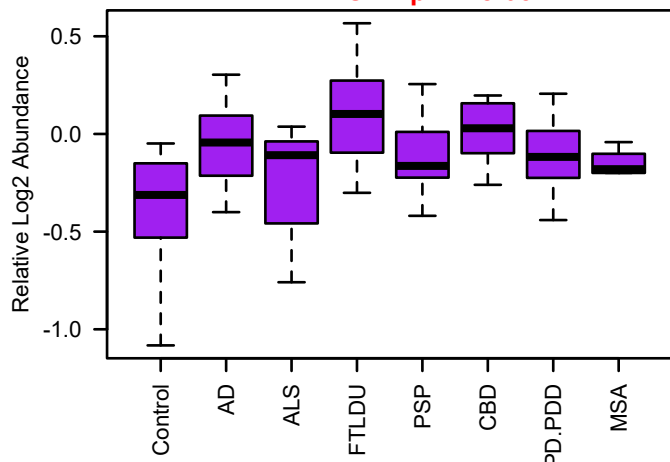

**HNRNPM UPenn Mixed PRM**  
**K-W ANOVA p: 8.1e-05**

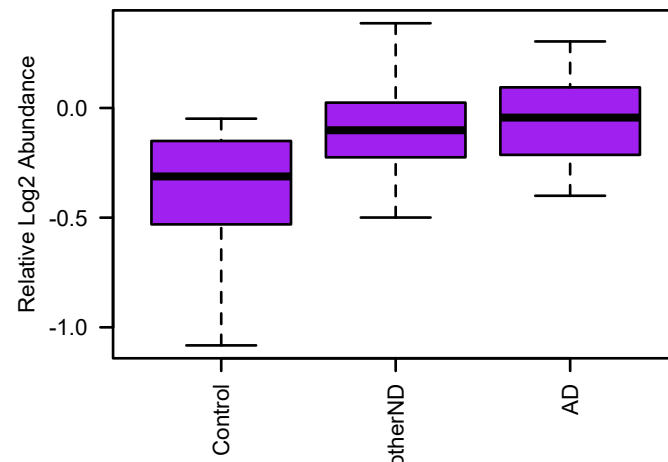

**bicor=0.25, p=0.021**  
**cor=0.31, p=0.0041**

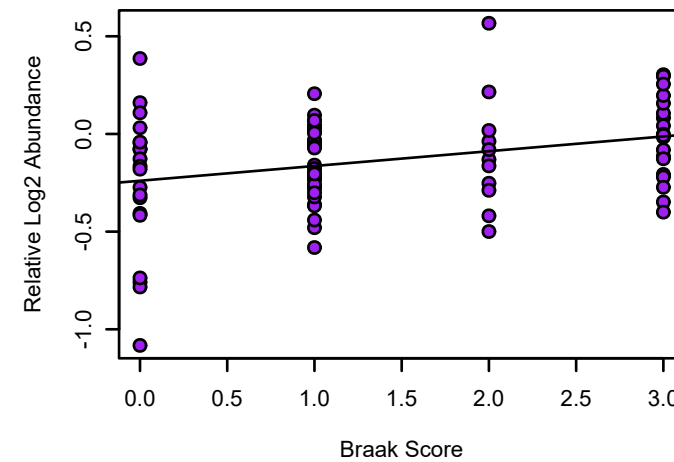

**bicor=0.13, p=0.18**  
**cor=0.16, p=0.11**

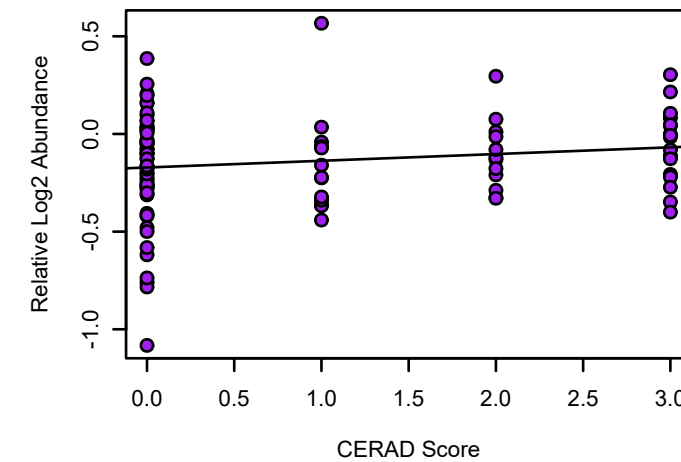

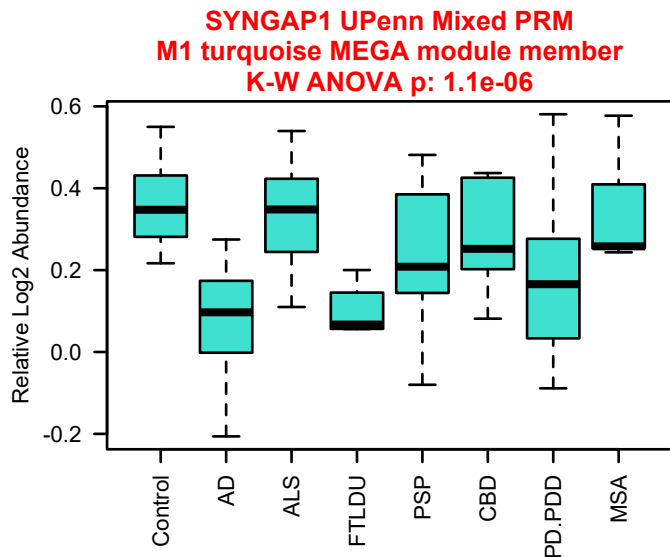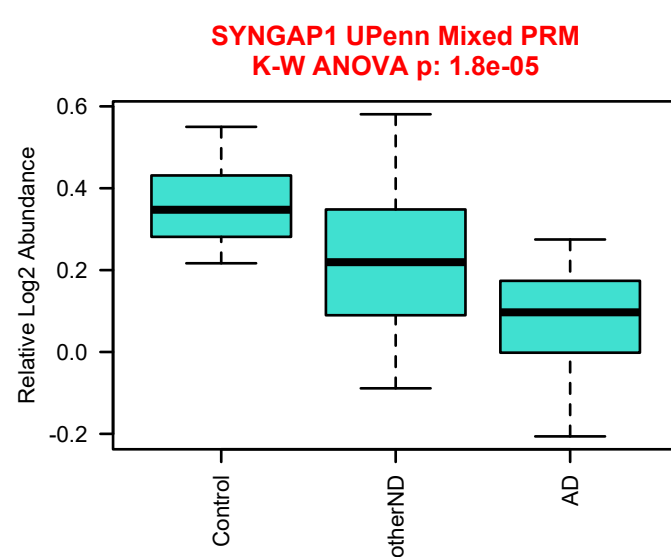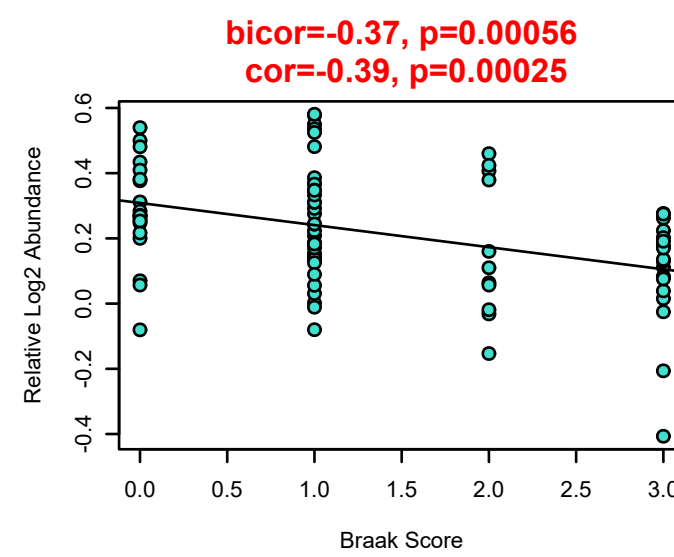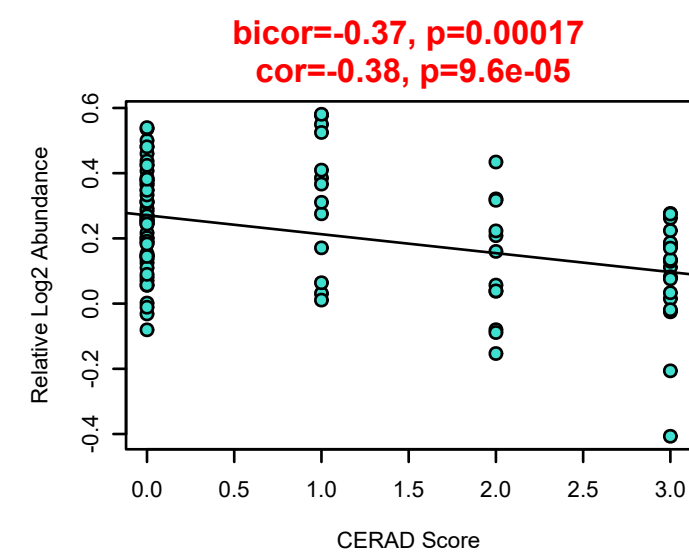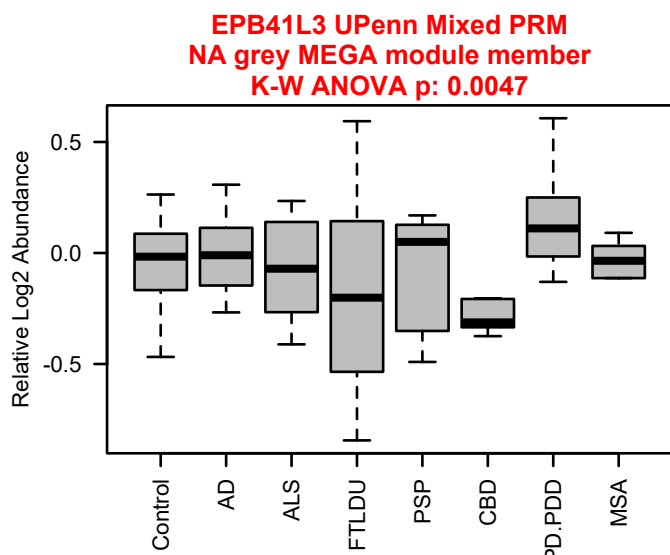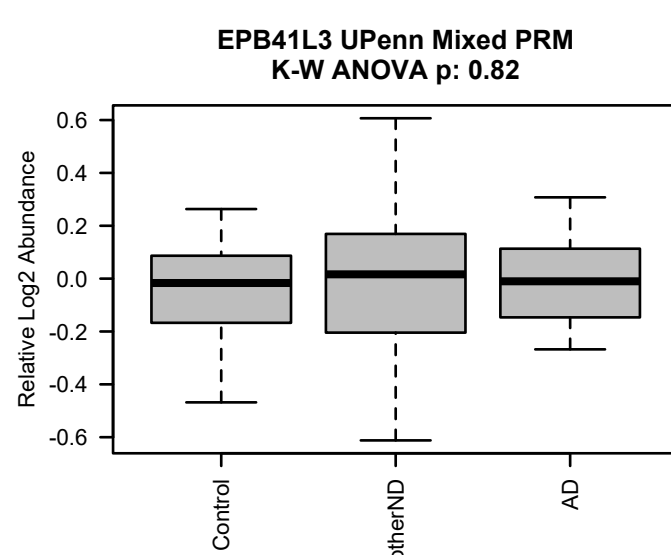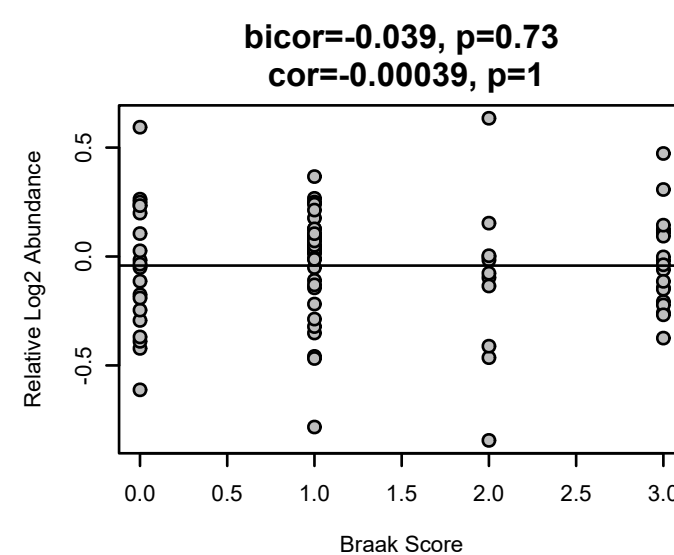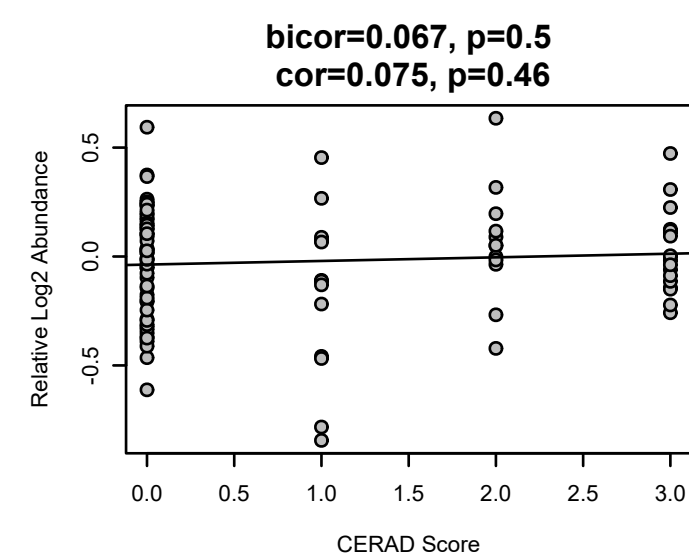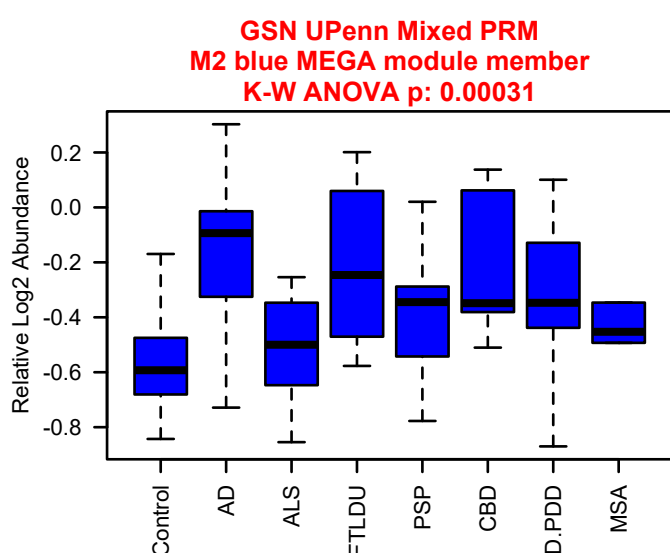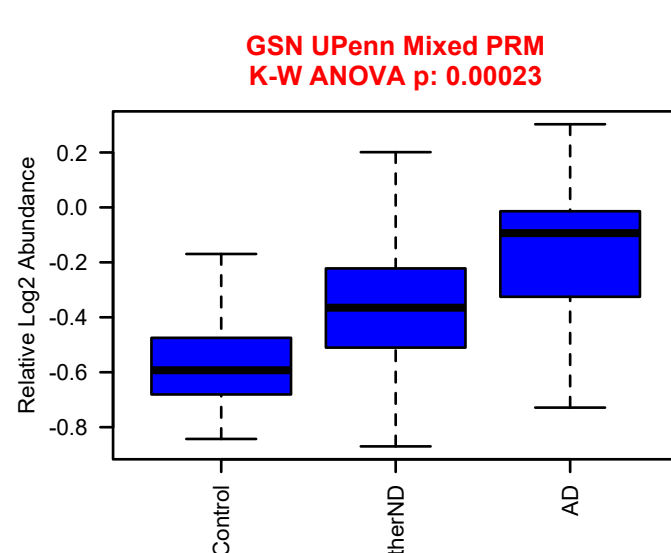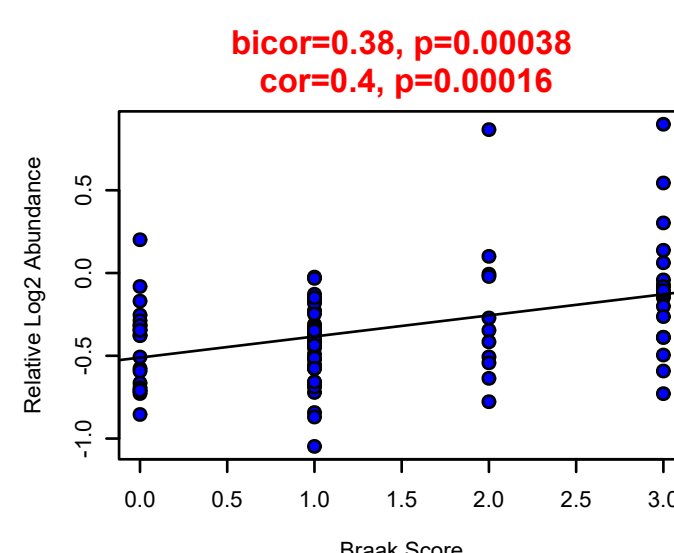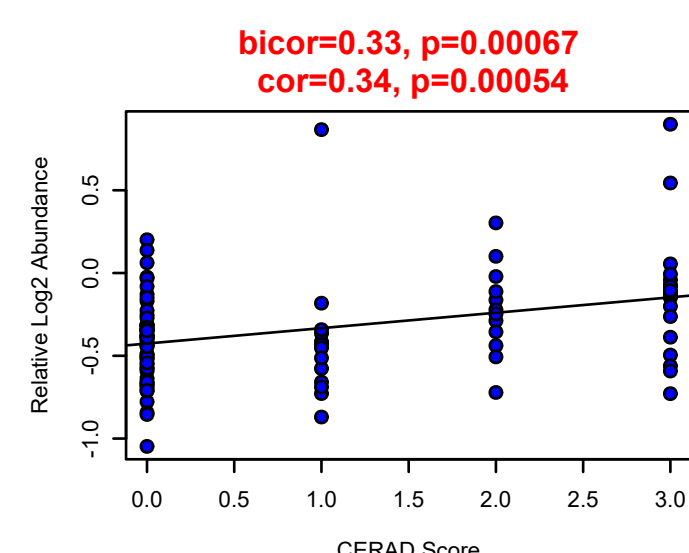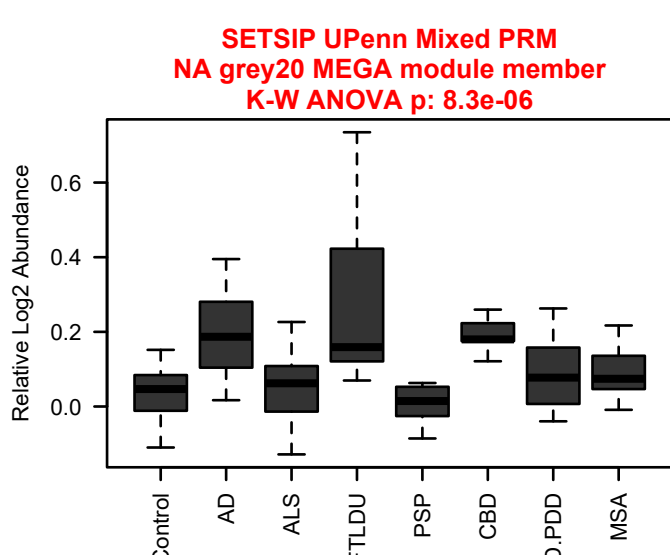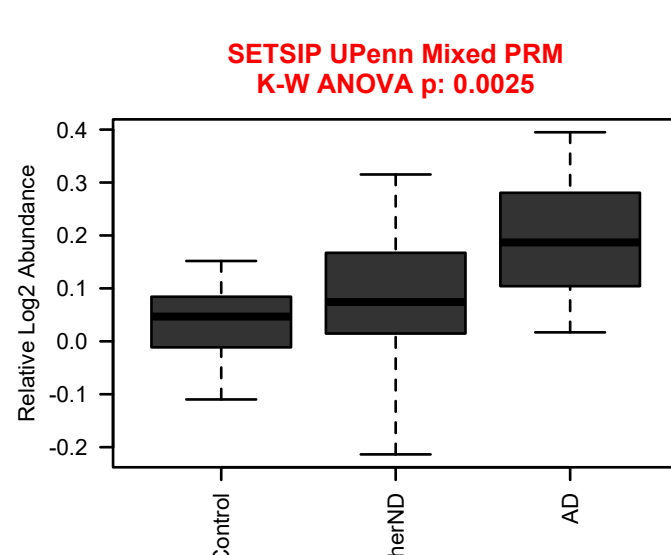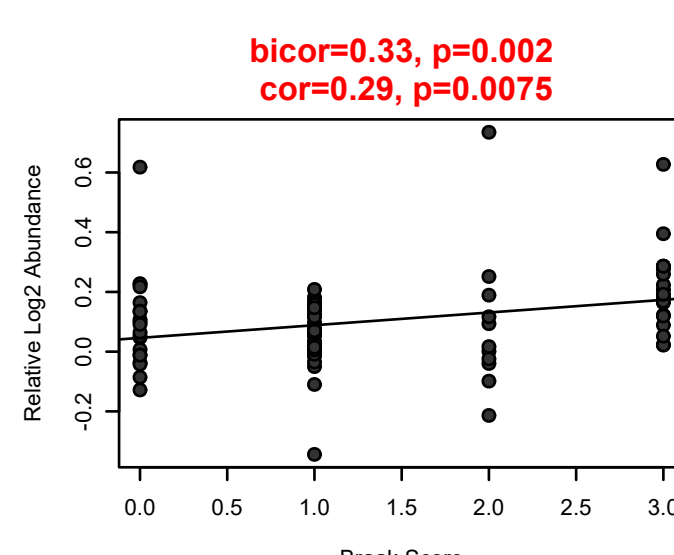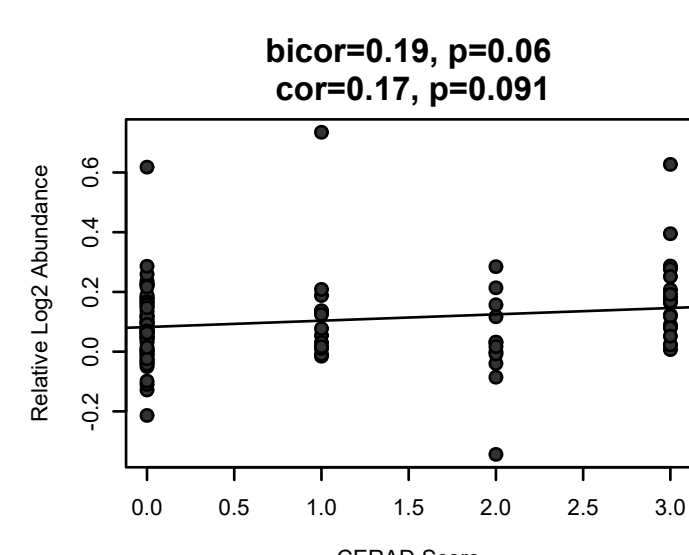

**SET UPenn Mixed PRM**  
M10 purple MEGA module member  
K-W ANOVA p: 0.76

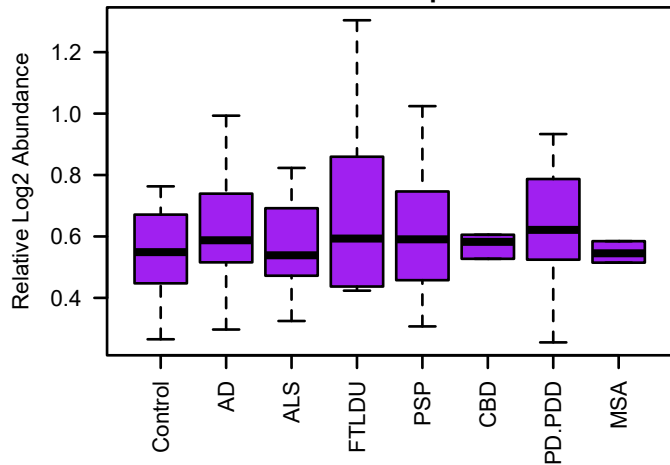

**SET UPenn Mixed PRM**  
K-W ANOVA p: 0.32

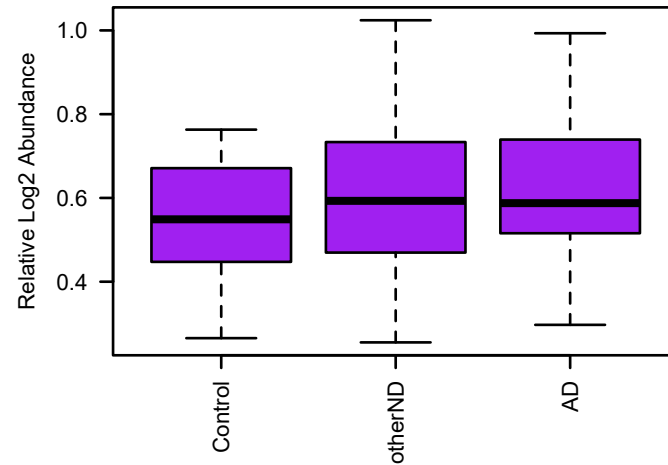

**bicor=0.12, p=0.28**  
**cor=0.054, p=0.63**

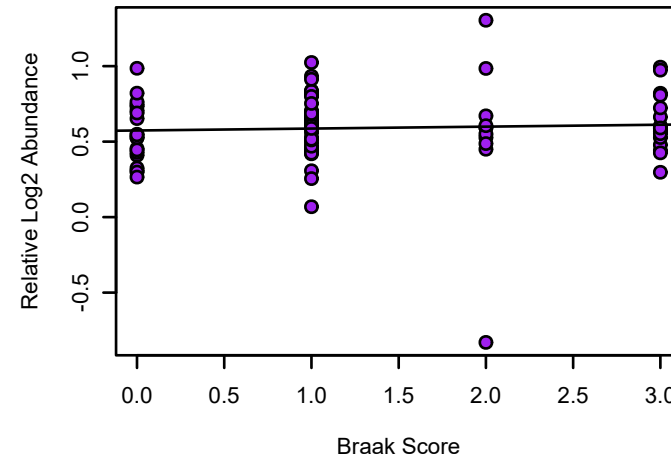

**bicor=0.082, p=0.41**  
**cor=0.015, p=0.88**

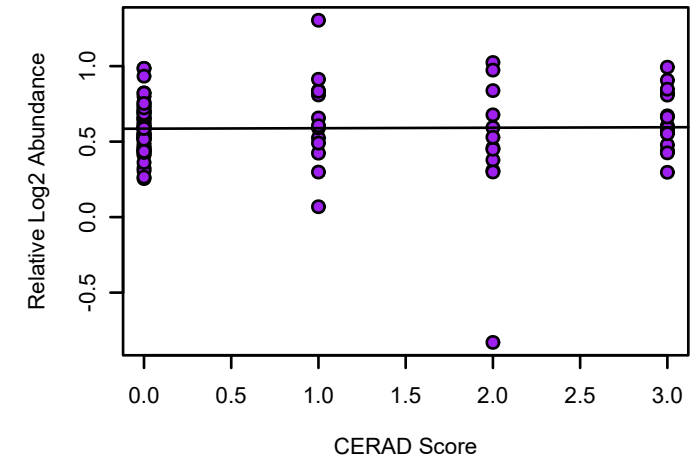

**NDUFA6 UPenn Mixed PRM**  
M3 brown MEGA module member  
K-W ANOVA p: 0.005

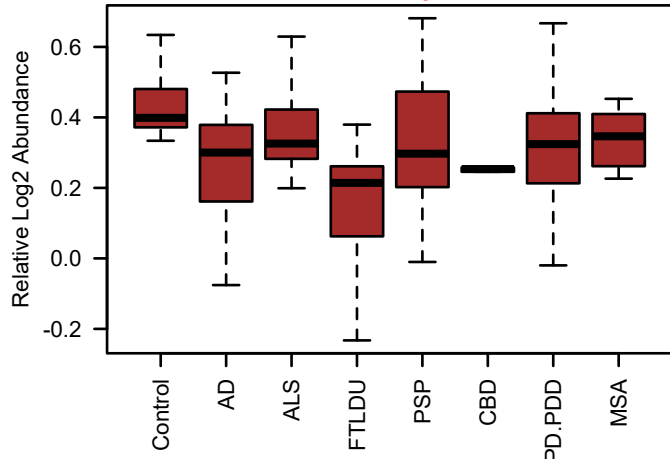

**NDUFA6 UPenn Mixed PRM**  
K-W ANOVA p: 0.014

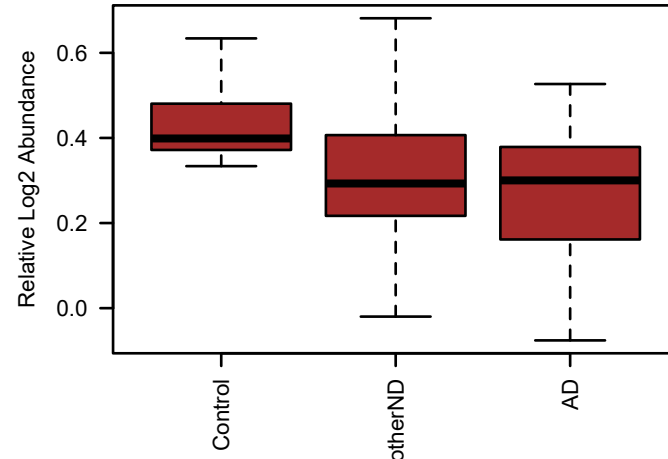

**bicor=-0.22, p=0.043**  
**cor=-0.19, p=0.083**

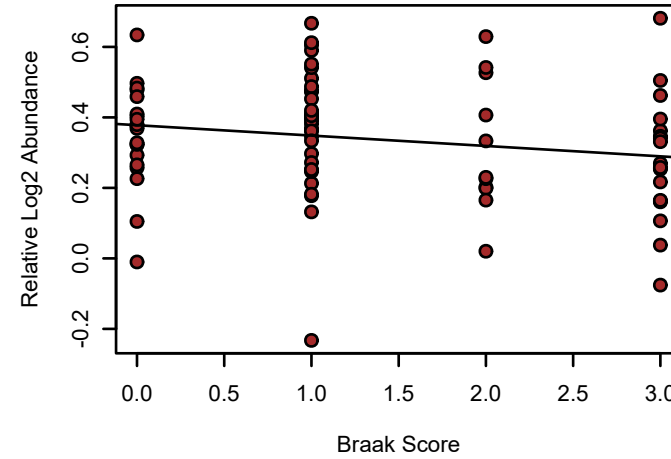

**bicor=-0.3, p=0.0023**  
**cor=-0.29, p=0.0034**

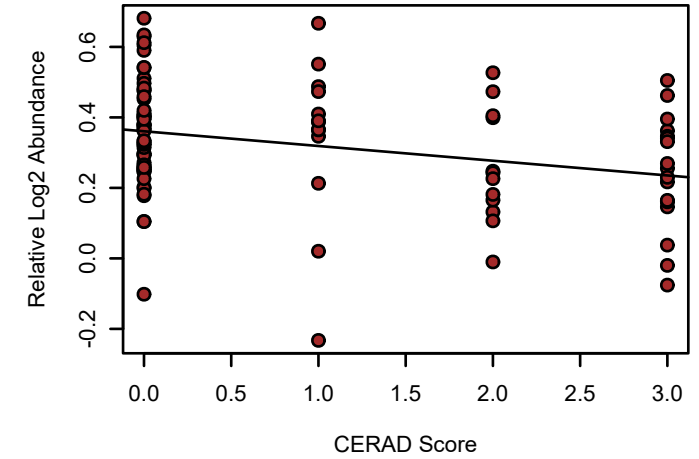

**SPTAN1 UPenn Mixed PRM**  
NA grey MEGA module member  
K-W ANOVA p: 0.0062

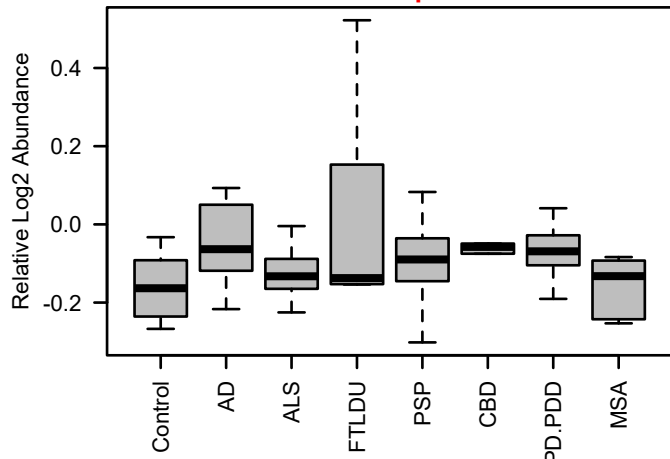

**SPTAN1 UPenn Mixed PRM**  
K-W ANOVA p: 0.027

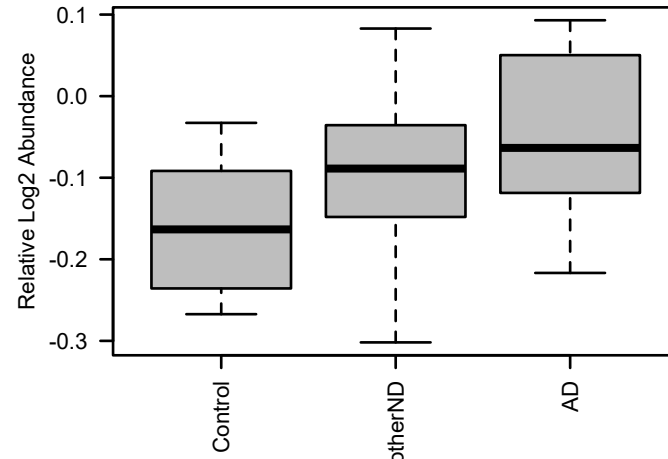

**bicor=0.27, p=0.012**  
**cor=0.21, p=0.055**

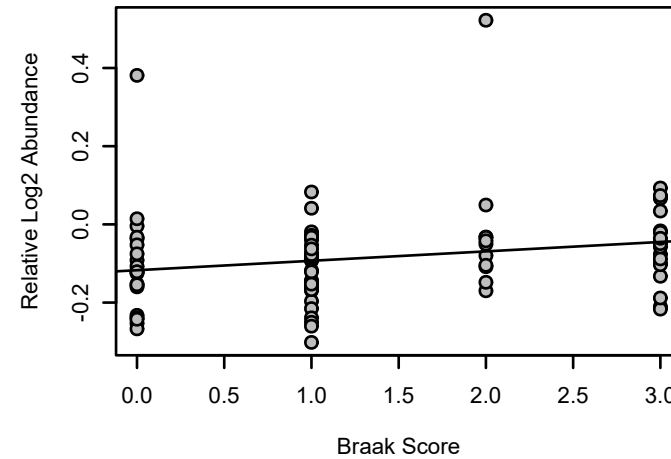

**bicor=0.26, p=0.0094**  
**cor=0.18, p=0.073**

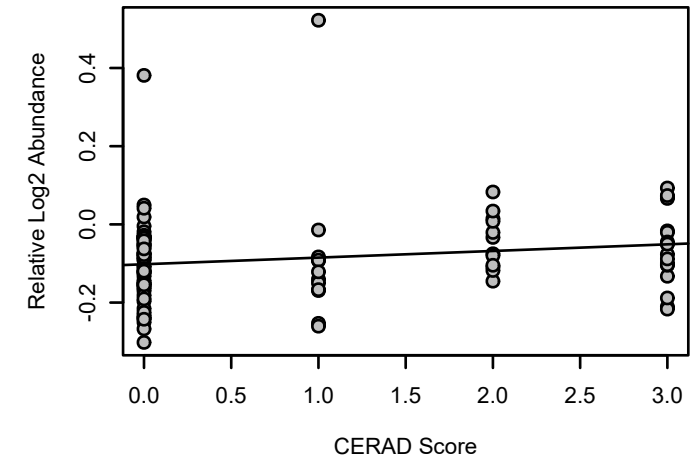

**MATR3 UPenn Mixed PRM**  
M10 purple MEGA module member  
K-W ANOVA p: 0.29

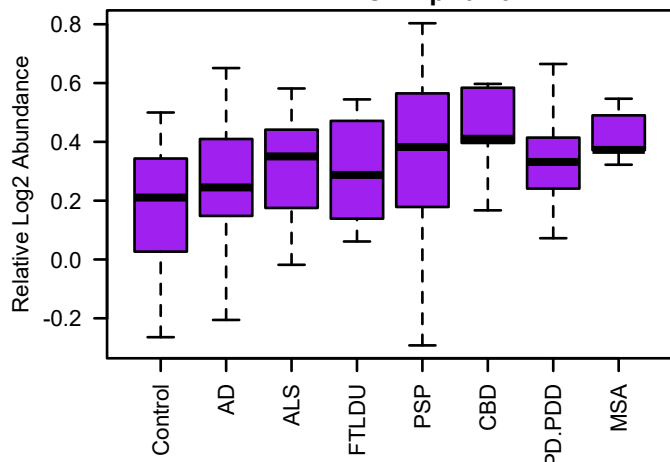

**MATR3 UPenn Mixed PRM**  
K-W ANOVA p: 0.068

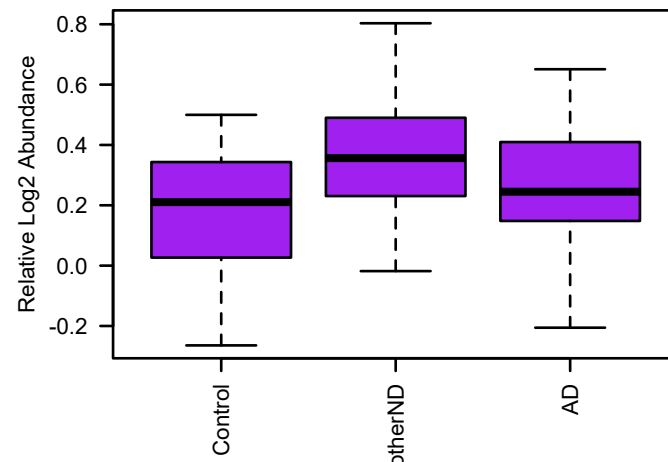

**bicor=0.026, p=0.82**  
**cor=0.11, p=0.32**

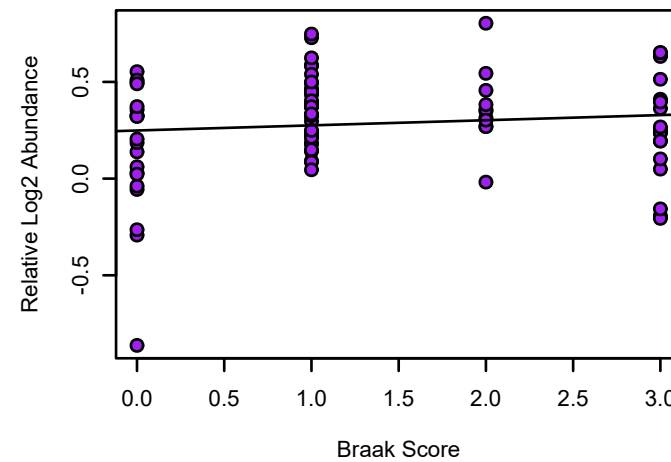

**bicor=-0.12, p=0.23**  
**cor=-0.081, p=0.42**

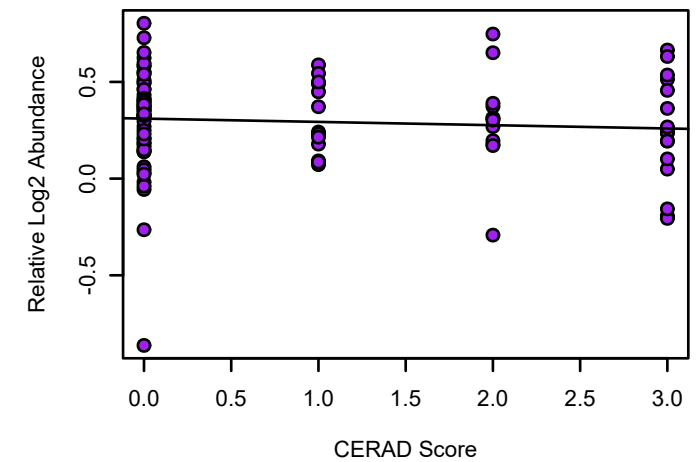

**DNM1 UPenn Mixed PRM**  
M1 turquoise MEGA module member  
K-W ANOVA p: 0.022

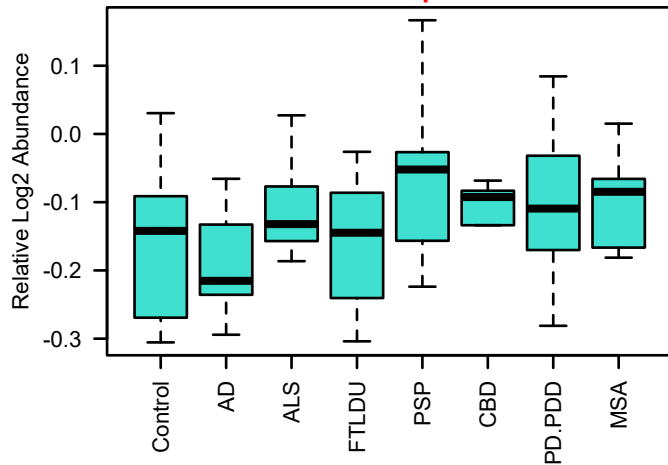

**DNM1 UPenn Mixed PRM**  
K-W ANOVA p: 0.0033

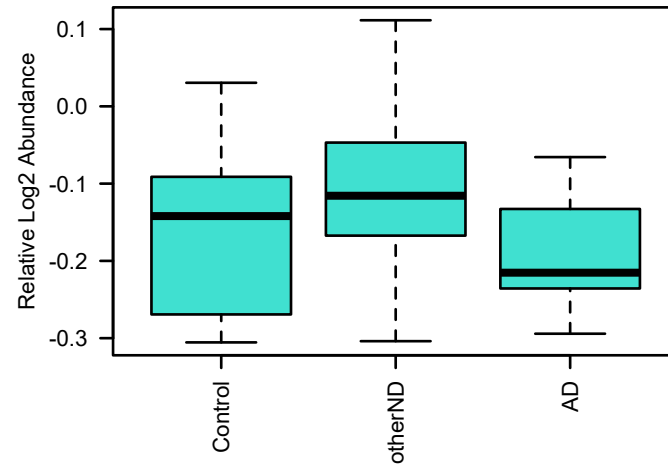

**bicor=-0.094, p=0.39**  
**cor=-0.092, p=0.41**

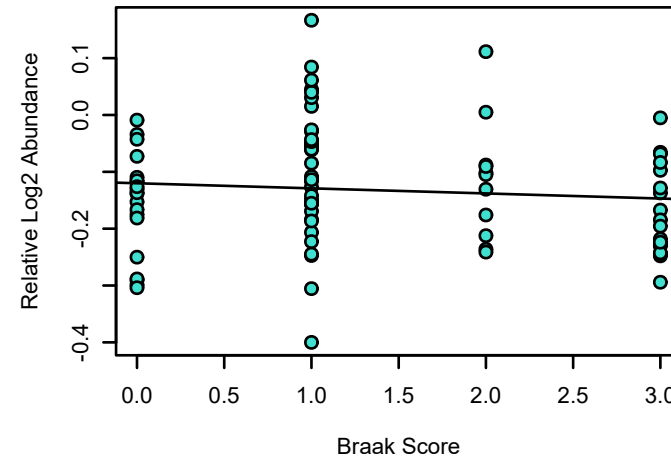

**bicor=-0.13, p=0.2**  
**cor=-0.11, p=0.28**

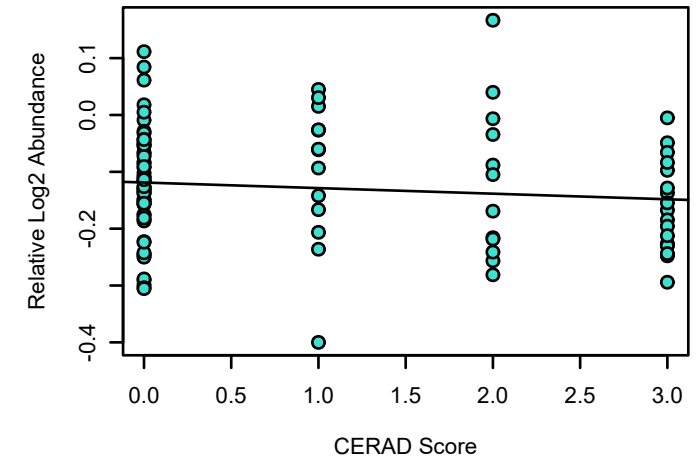

**STXBP1 UPenn Mixed PRM**  
M1 turquoise MEGA module member  
K-W ANOVA p: 0.0046

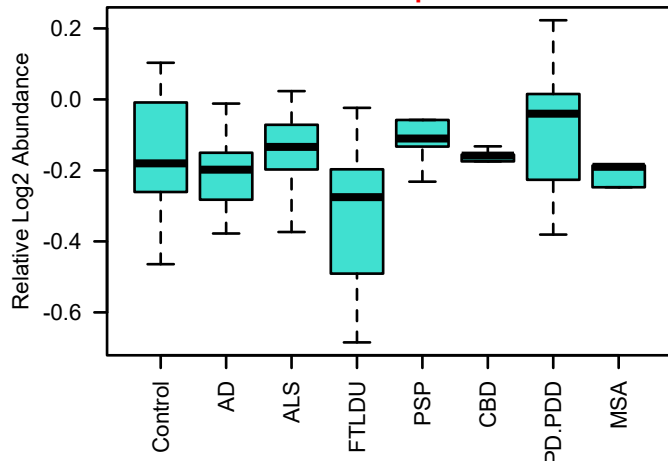

**STXBP1 UPenn Mixed PRM**  
K-W ANOVA p: 0.4

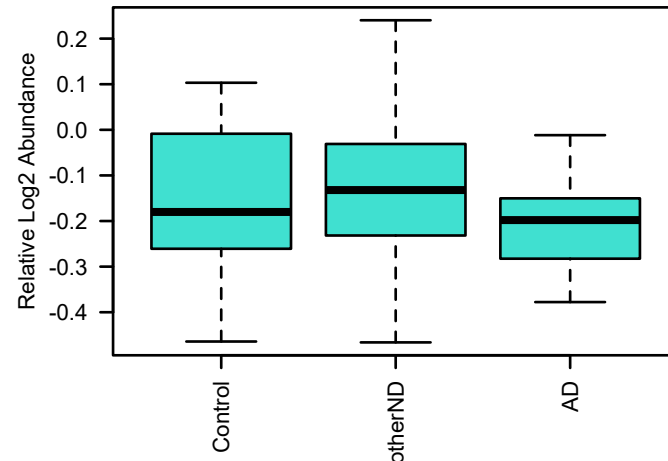

**bicor=-0.083, p=0.45**  
**cor=-0.075, p=0.5**

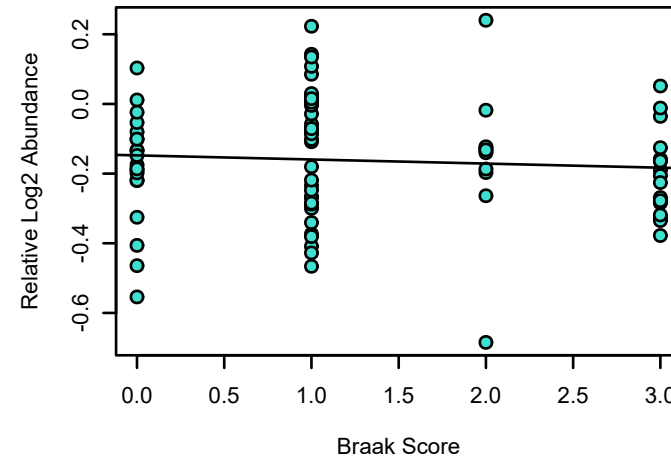

**bicor=-0.07, p=0.49**  
**cor=-0.067, p=0.51**

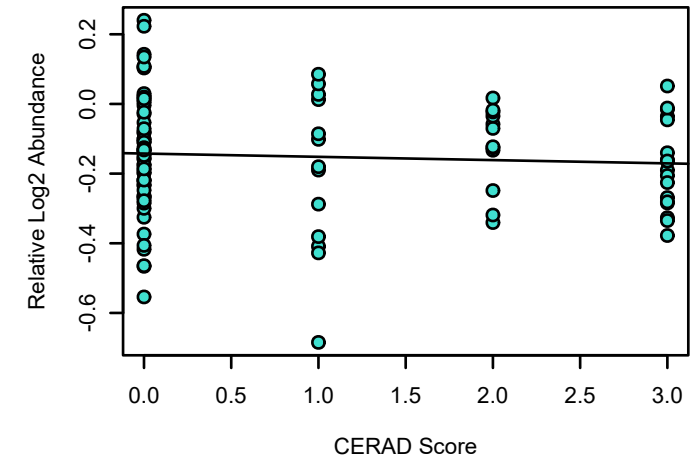

**GABRA1 UPenn Mixed PRM**  
M3 brown MEGA module member  
K-W ANOVA p: 0.37

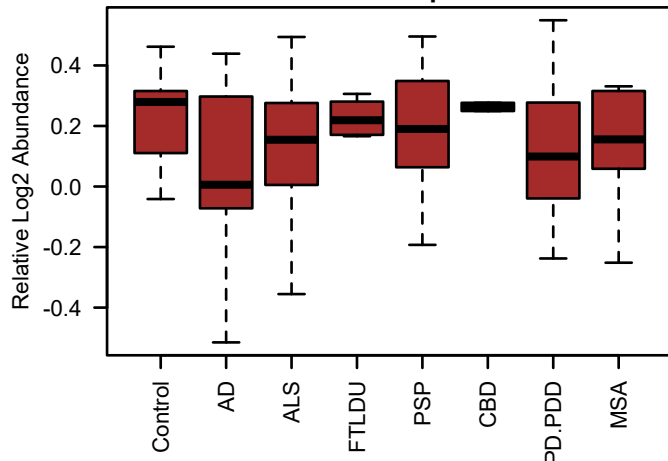

**GABRA1 UPenn Mixed PRM**  
K-W ANOVA p: 0.24

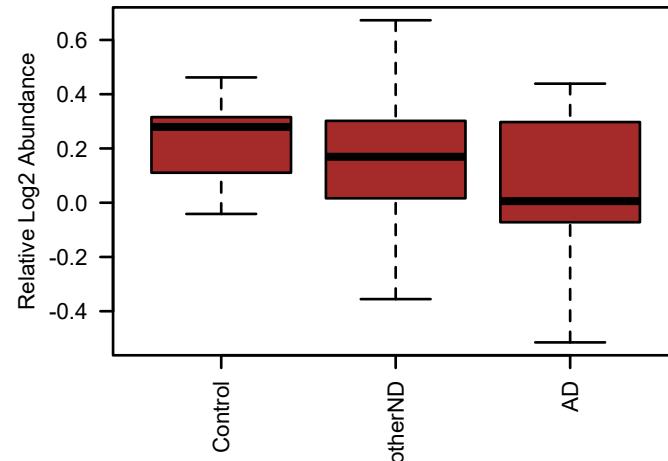

**bicor=-0.18, p=0.095**  
**cor=-0.16, p=0.15**

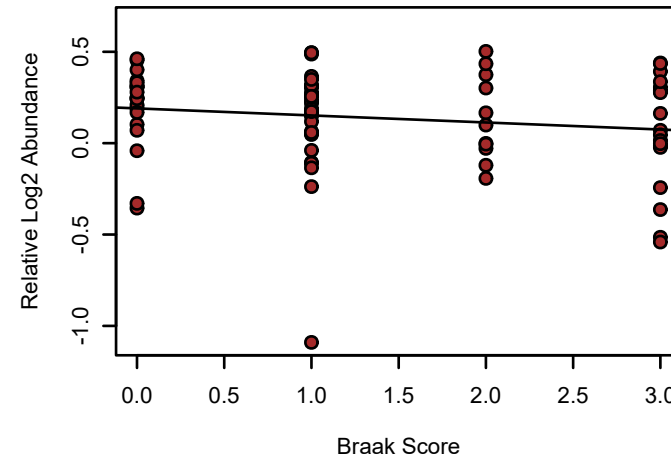

**bicor=-0.21, p=0.035**  
**cor=-0.25, p=0.012**

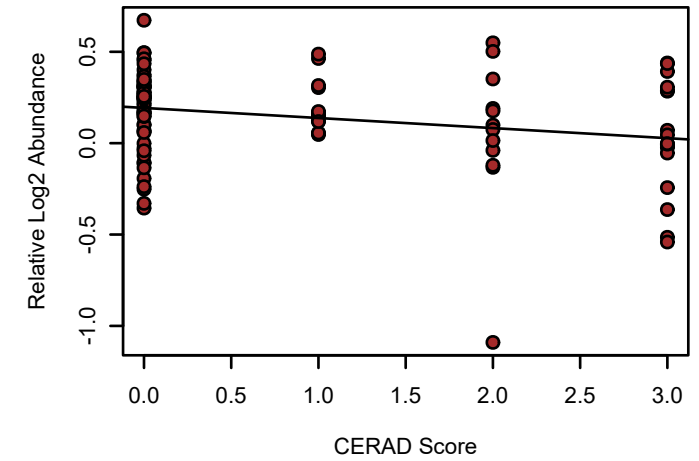

**RPL7 UPenn Mixed PRM**  
M7 black MEGA module member  
K-W ANOVA p: 0.24

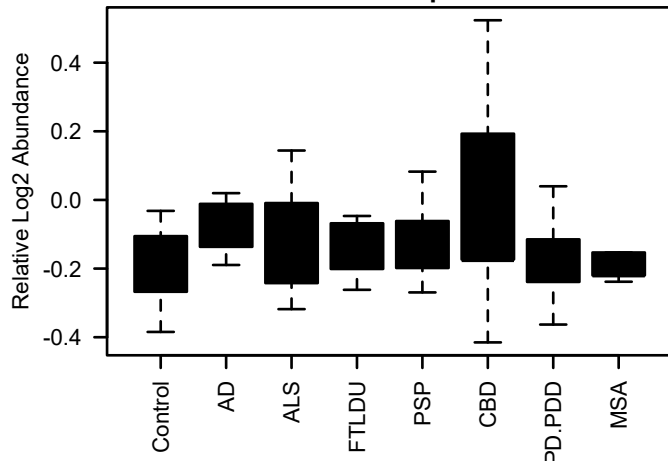

**RPL7 UPenn Mixed PRM**  
K-W ANOVA p: 0.046

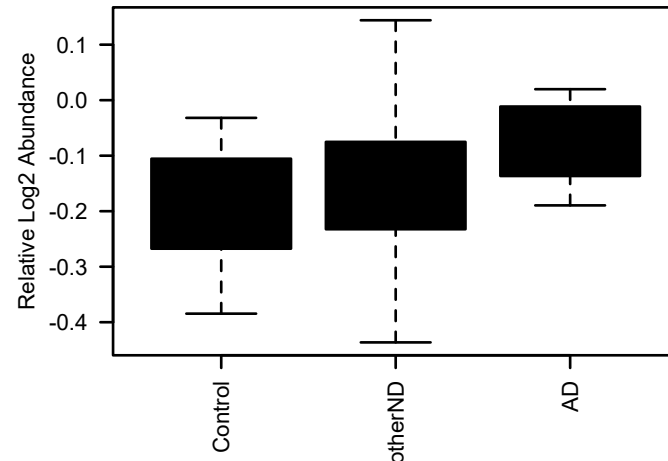

**bicor=0.22, p=0.048**  
**cor=0.3, p=0.0056**

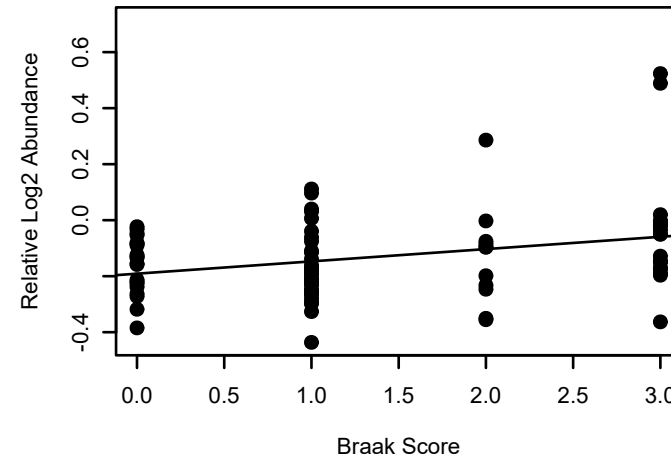

**bicor=0.22, p=0.025**  
**cor=0.19, p=0.058**

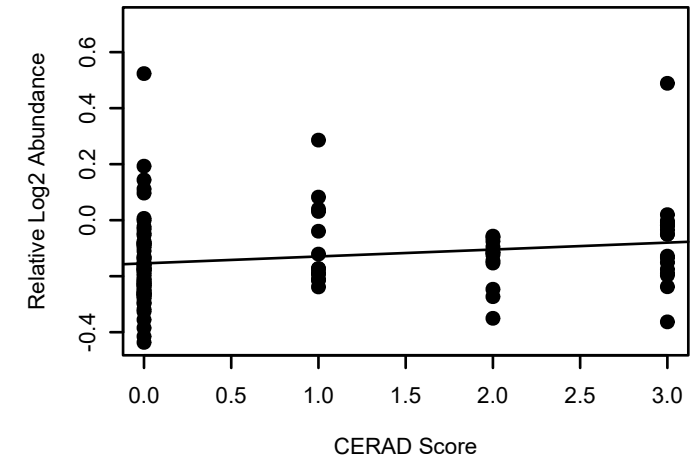

**DLGAP1 UPenn Mixed PRM**  
M1 turquoise MEGA module member  
K-W ANOVA p: 0.00061

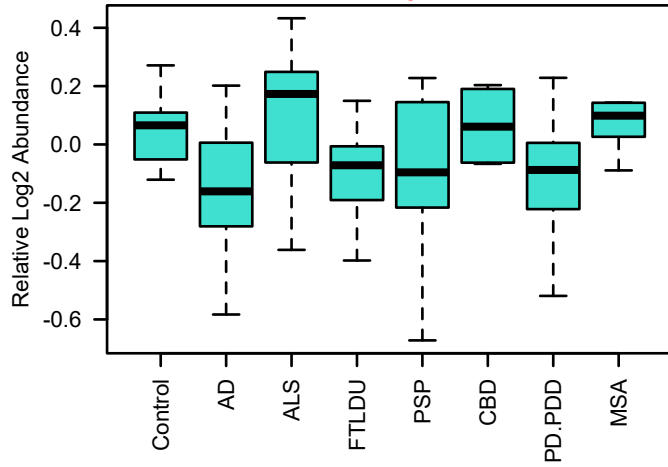

**DLGAP1 UPenn Mixed PRM**  
K-W ANOVA p: 0.0037

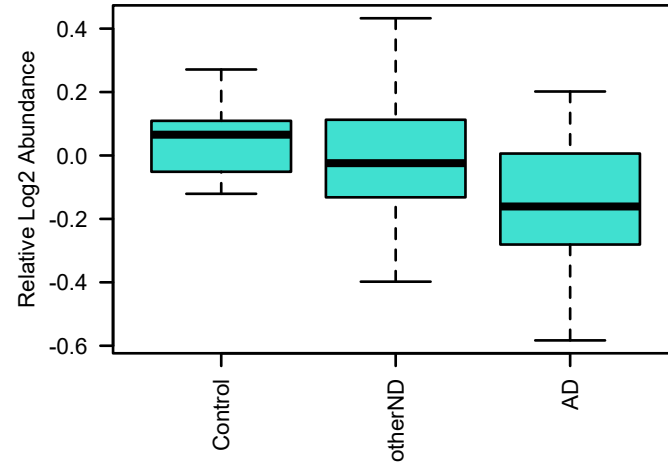

**bicor=-0.25, p=0.024**  
**cor=-0.29, p=0.0075**

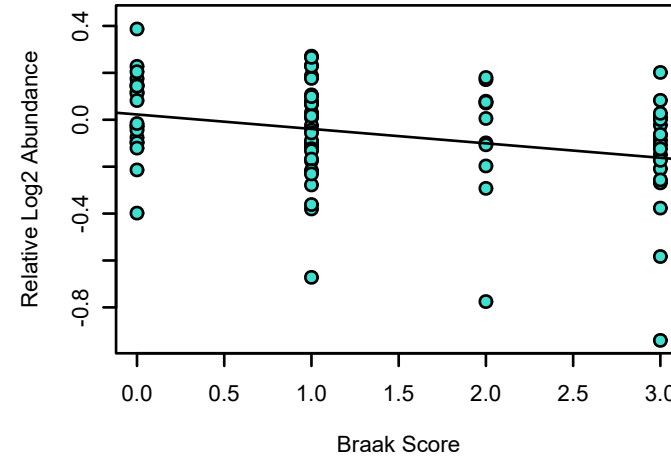

**bicor=-0.25, p=0.011**  
**cor=-0.3, p=0.0024**

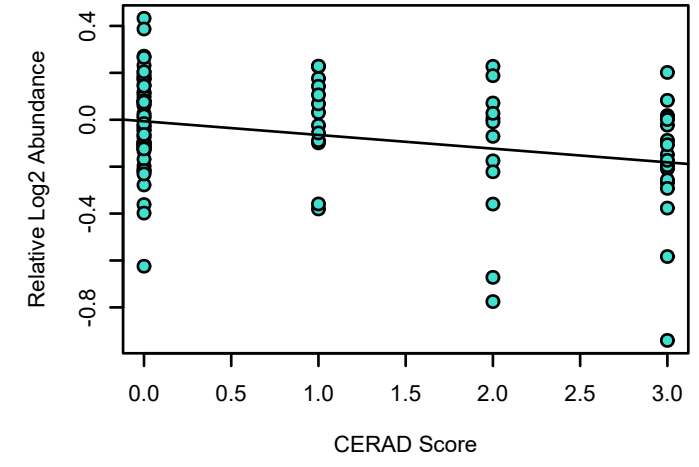

**SEPT6 UPenn Mixed PRM**  
M1 turquoise MEGA module member  
K-W ANOVA p: 0.26

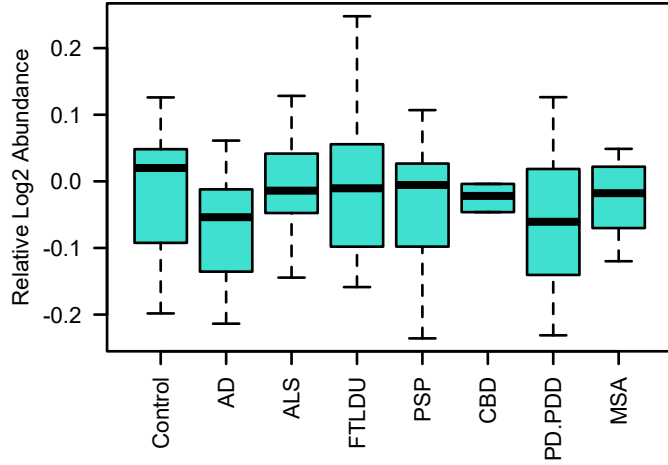

**SEPT6 UPenn Mixed PRM**  
K-W ANOVA p: 0.074

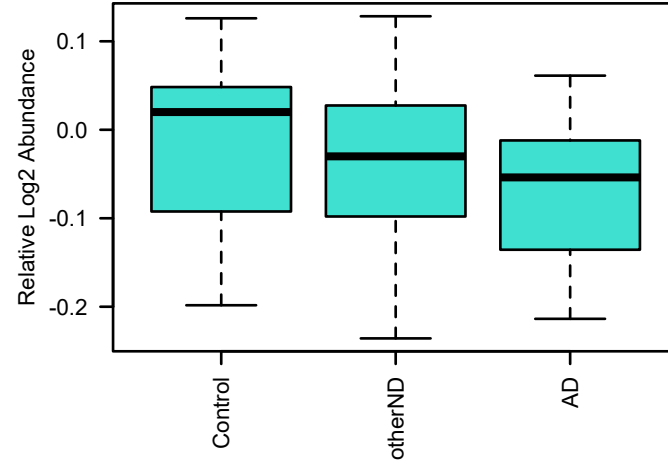

**bicor=-0.24, p=0.026**  
**cor=-0.27, p=0.013**

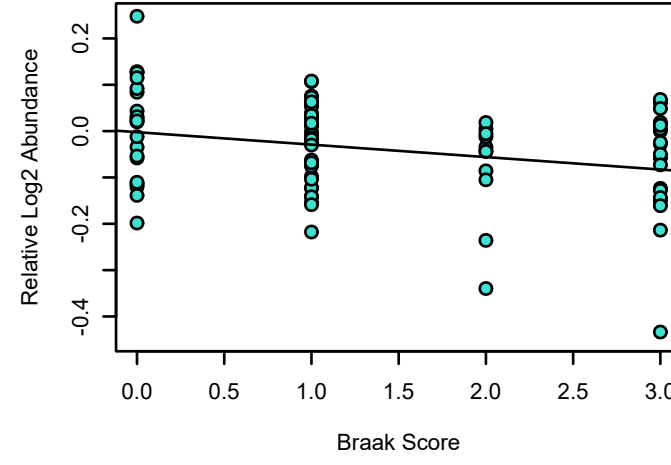

**bicor=-0.19, p=0.064**  
**cor=-0.23, p=0.021**

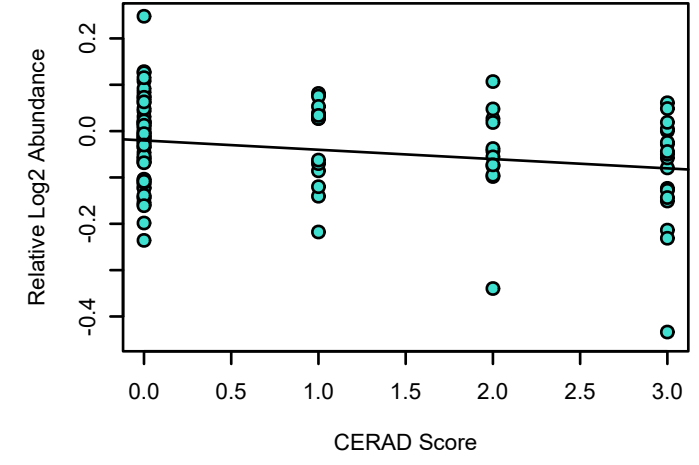

**CS UPenn Mixed PRM**  
NA grey MEGA module member  
K-W ANOVA p: 0.49

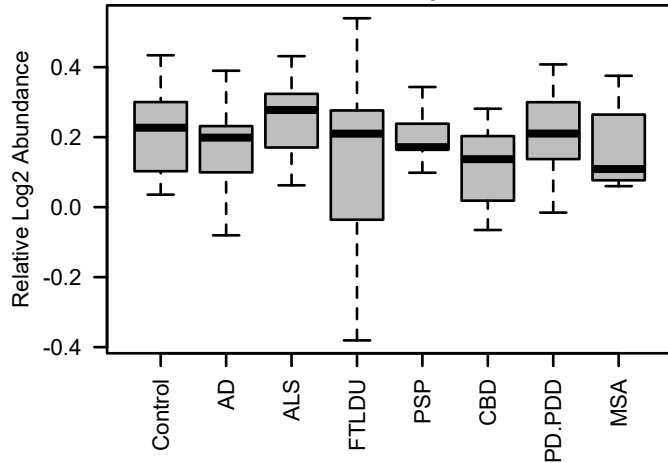

**CS UPenn Mixed PRM**  
K-W ANOVA p: 0.76

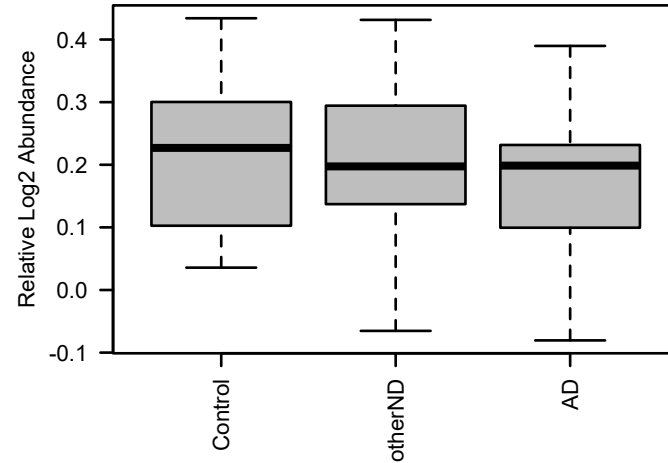

**bicor=-0.19, p=0.086**  
**cor=-0.2, p=0.068**

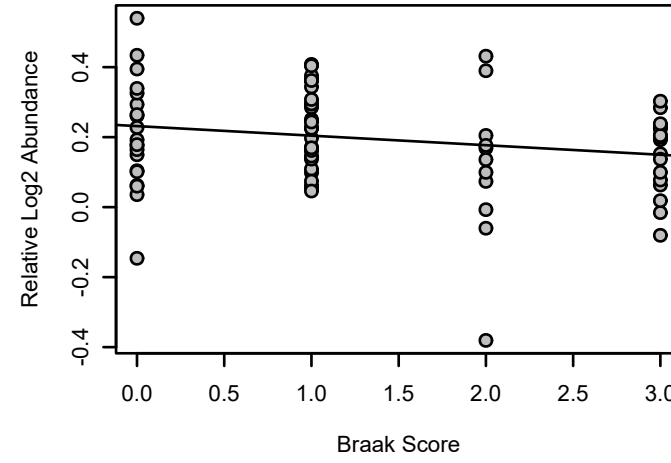

**bicor=-0.093, p=0.36**  
**cor=-0.084, p=0.41**

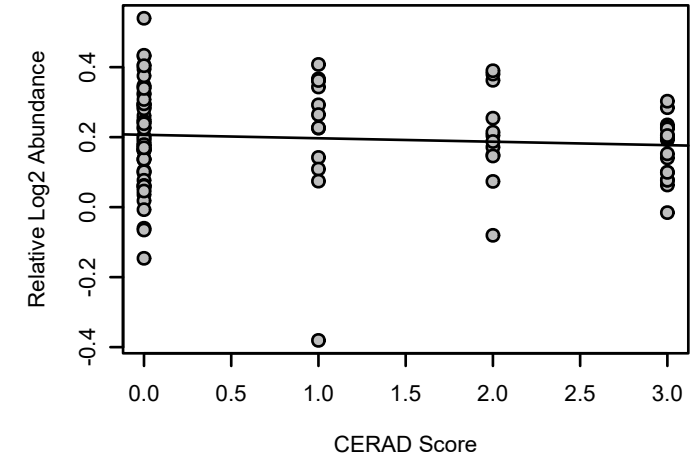

**PSD3 UPenn Mixed PRM**  
M1 turquoise MEGA module member  
K-W ANOVA p: 0.014

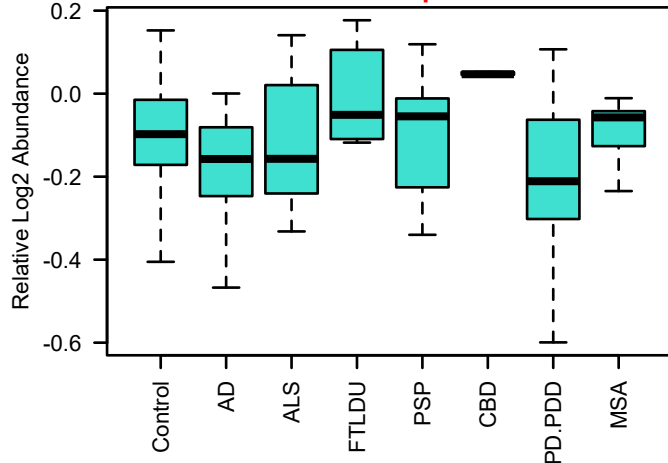

**PSD3 UPenn Mixed PRM**  
K-W ANOVA p: 0.088

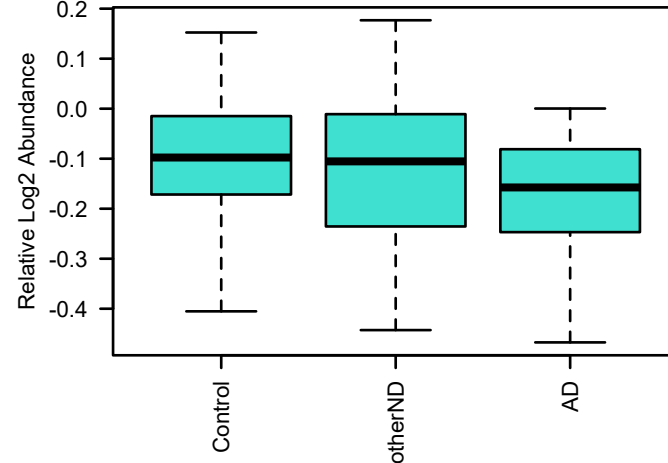

**bicor=-0.14, p=0.21**  
**cor=-0.14, p=0.2**

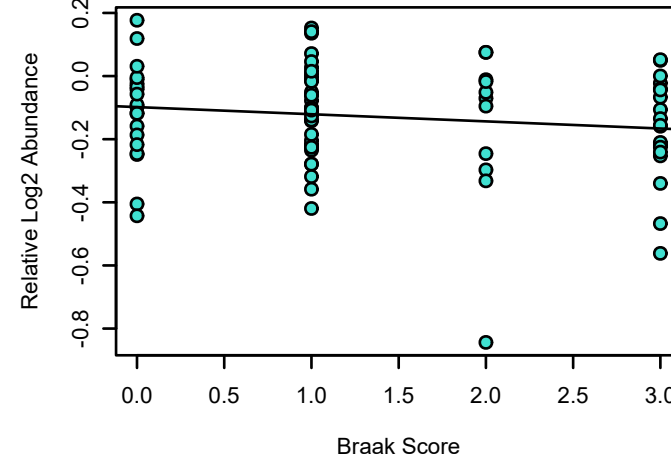

**bicor=-0.13, p=0.2**  
**cor=-0.16, p=0.11**

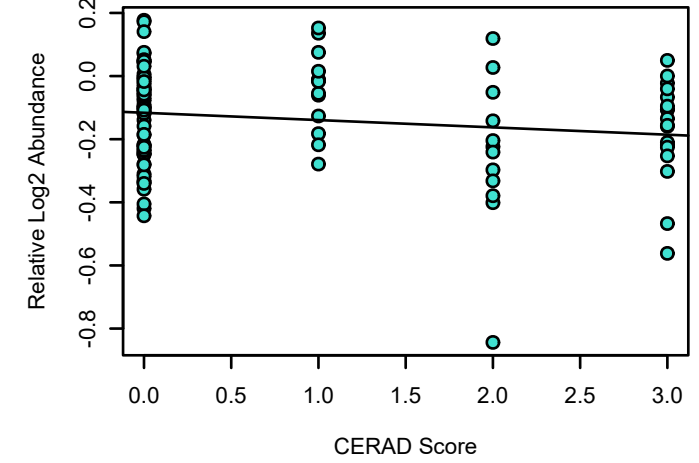



**DGKB UPenn Mixed PRM**  
M1 turquoise MEGA module member  
K-W ANOVA p: 0.0025

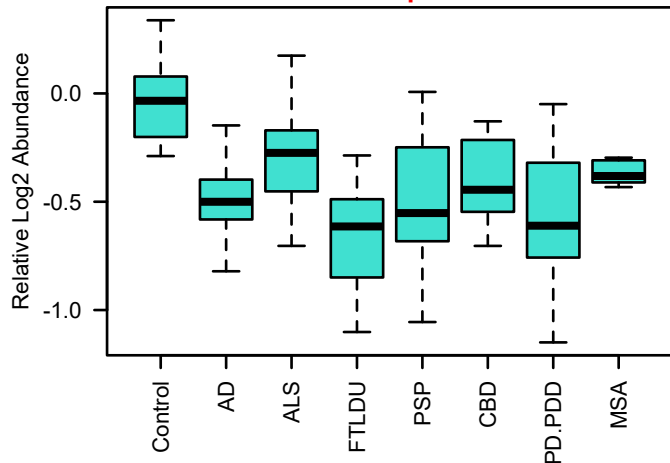

**DGKB UPenn Mixed PRM**  
K-W ANOVA p: 8.3e-05

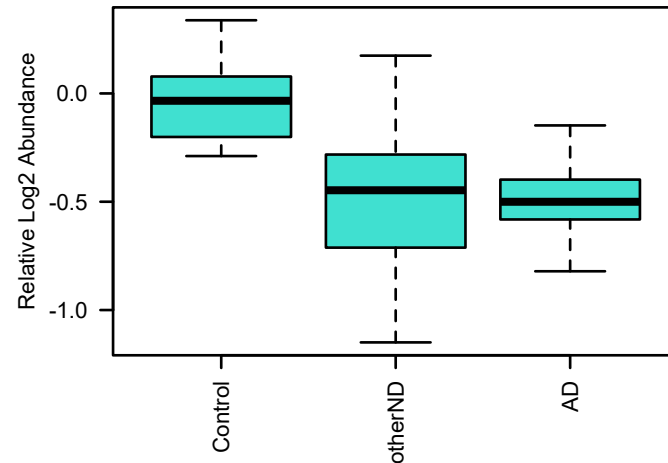

**bicor=-0.23, p=0.039**  
**cor=-0.25, p=0.022**

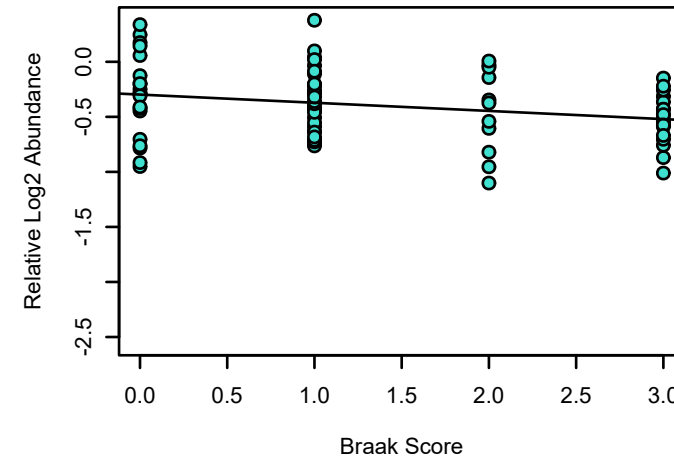

**bicor=-0.17, p=0.089**  
**cor=-0.18, p=0.073**

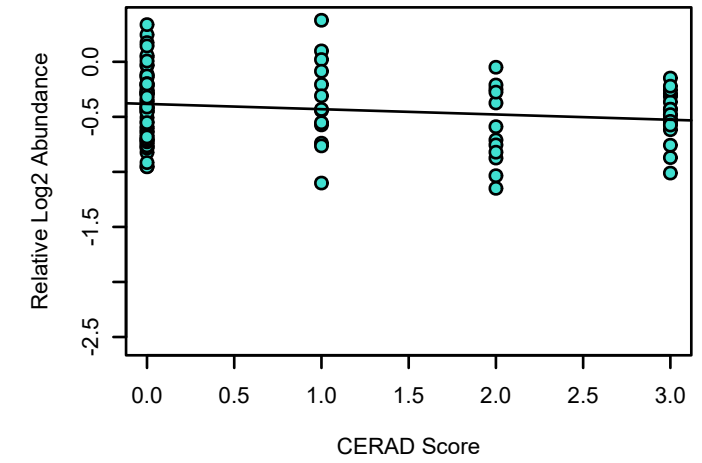

**SYNGR1 UPenn Mixed PRM**  
M1 turquoise MEGA module member  
K-W ANOVA p: 0.0048

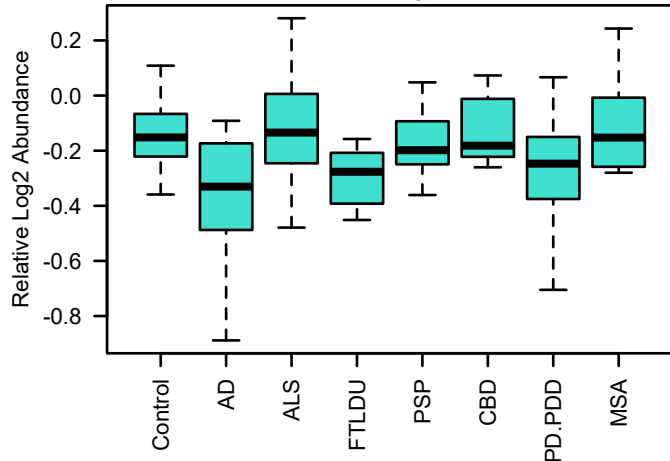

**SYNGR1 UPenn Mixed PRM**  
K-W ANOVA p: 0.0073

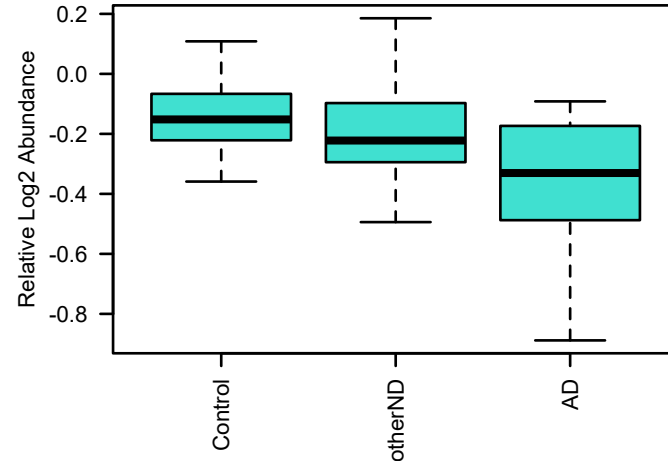

**bicor=-0.29, p=0.0078**  
**cor=-0.29, p=0.0075**

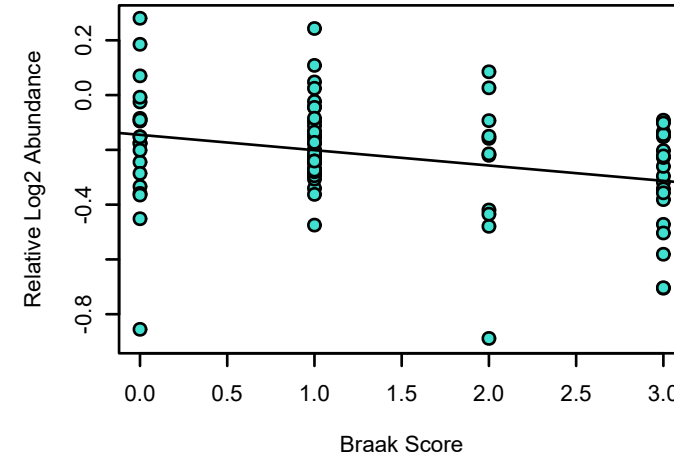

**bicor=-0.25, p=0.011**  
**cor=-0.25, p=0.012**

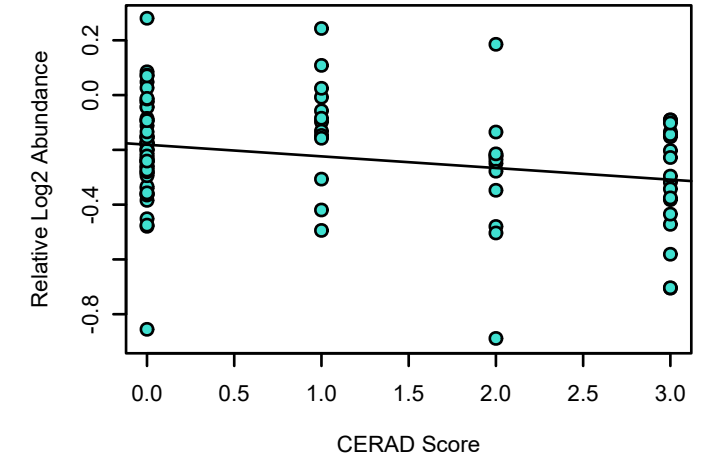

**GPM6B UPenn Mixed PRM**  
M1 turquoise MEGA module member  
K-W ANOVA p: 0.13

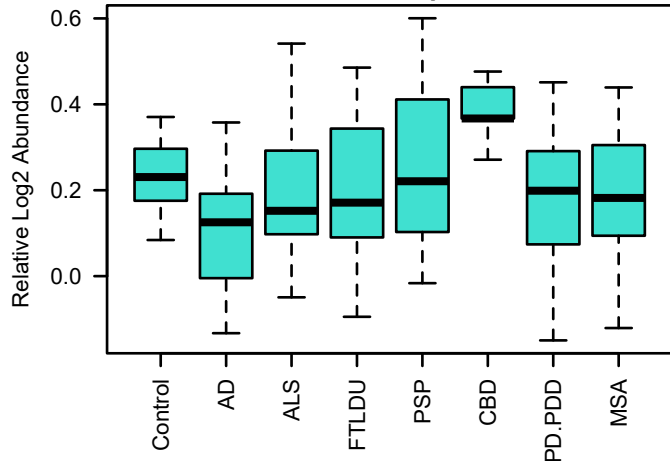

**GPM6B UPenn Mixed PRM**  
K-W ANOVA p: 0.094

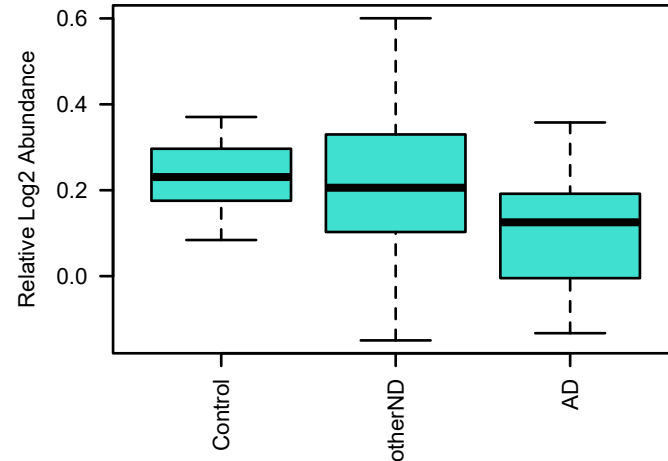

**bicor=-0.1, p=0.35**  
**cor=-0.11, p=0.32**

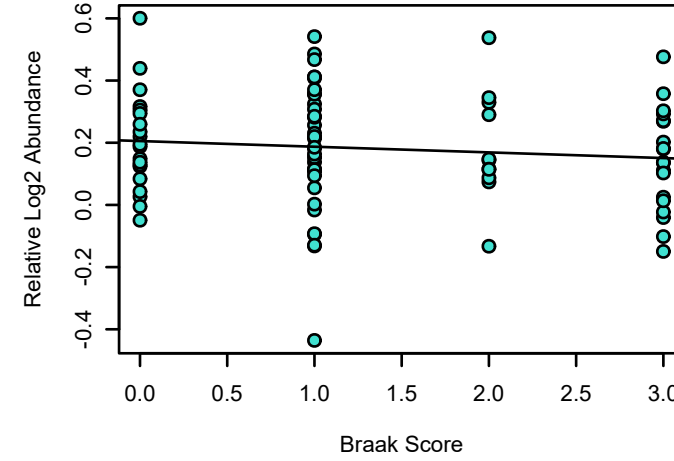

**bicor=-0.21, p=0.033**  
**cor=-0.22, p=0.028**

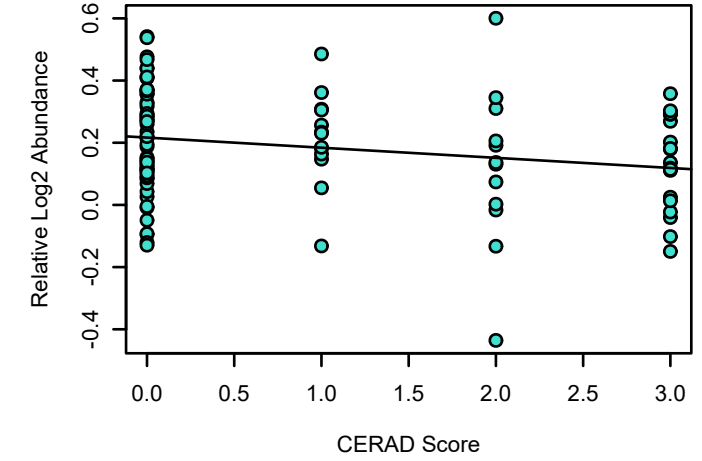

**STXBP5L UPenn Mixed PRM**  
M3 brown MEGA module member  
K-W ANOVA p: 0.024

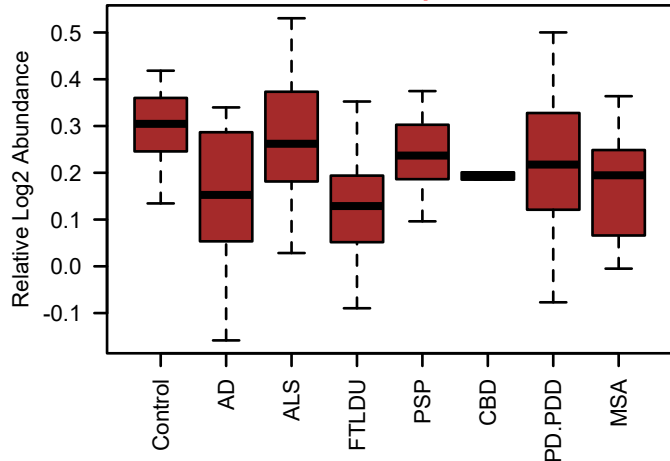

**STXBP5L UPenn Mixed PRM**  
K-W ANOVA p: 0.008

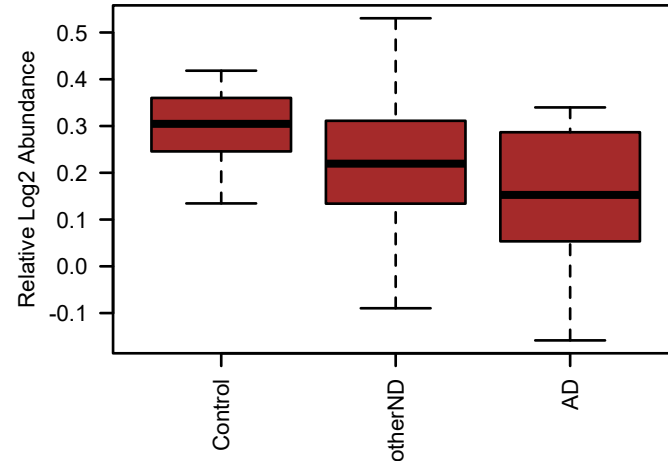

**bicor=-0.26, p=0.019**  
**cor=-0.28, p=0.0099**

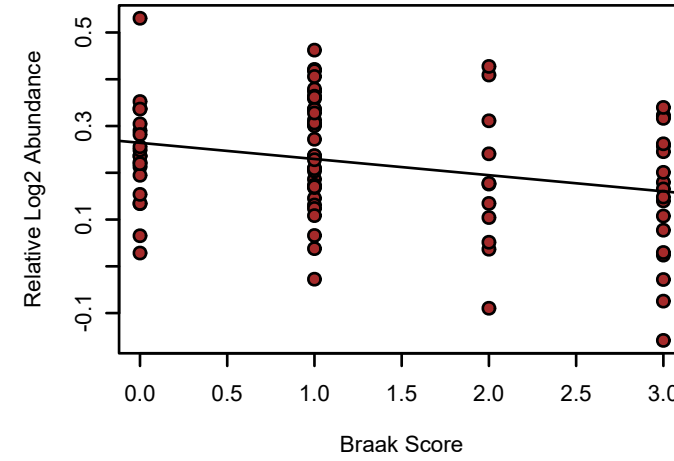

**bicor=-0.27, p=0.0071**  
**cor=-0.29, p=0.0034**

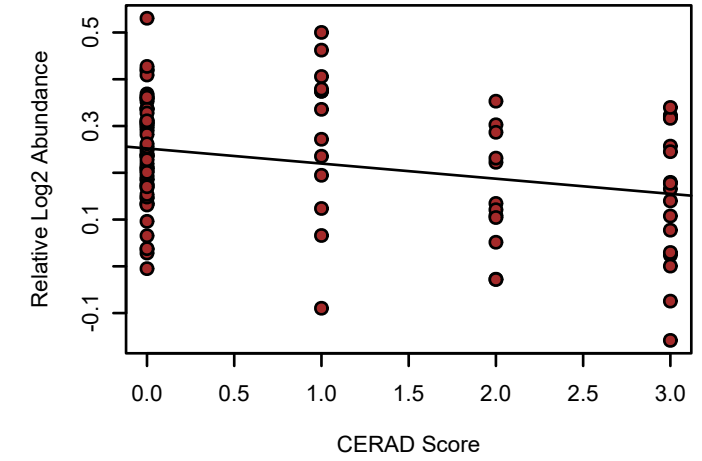

**MOG UPenn Mixed PRM**  
**M2 blue MEGA module member**  
**K-W ANOVA p: 0.052**

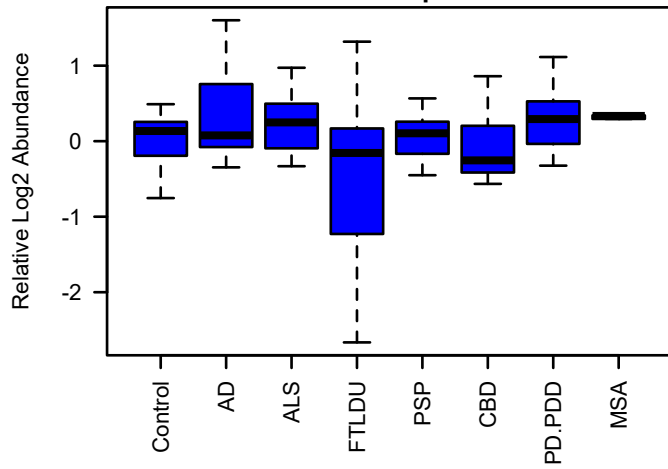

**MOG UPenn Mixed PRM**  
**K-W ANOVA p: 0.32**

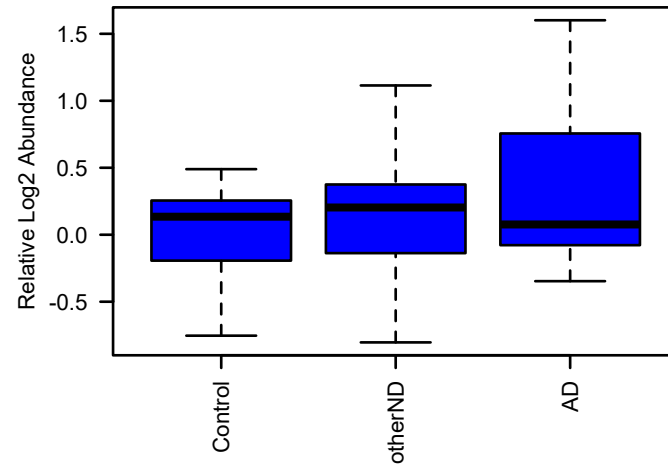

**bicor=0.077, p=0.49**  
**cor=0.11, p=0.32**

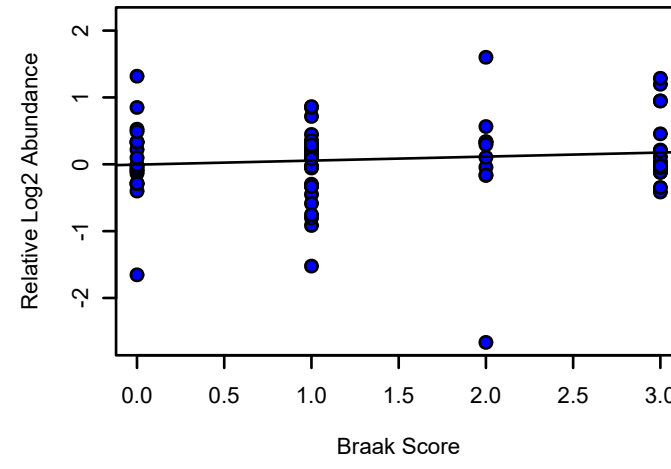

**bicor=0.072, p=0.48**  
**cor=0.1, p=0.32**

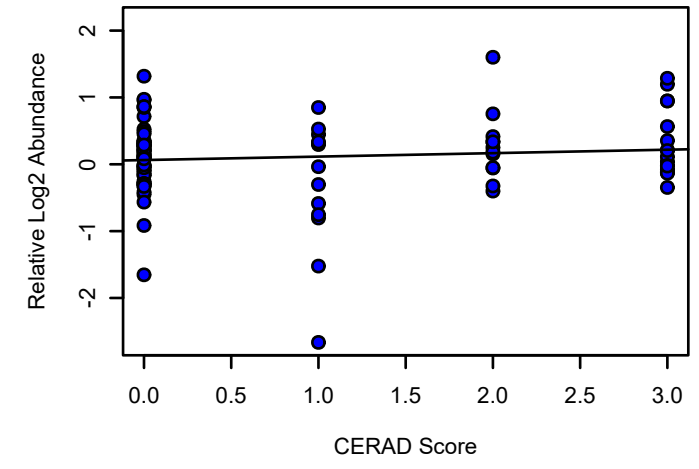

**PCDH1 UPenn Mixed PRM**  
**M1 turquoise MEGA module member**  
**K-W ANOVA p: 0.00041**

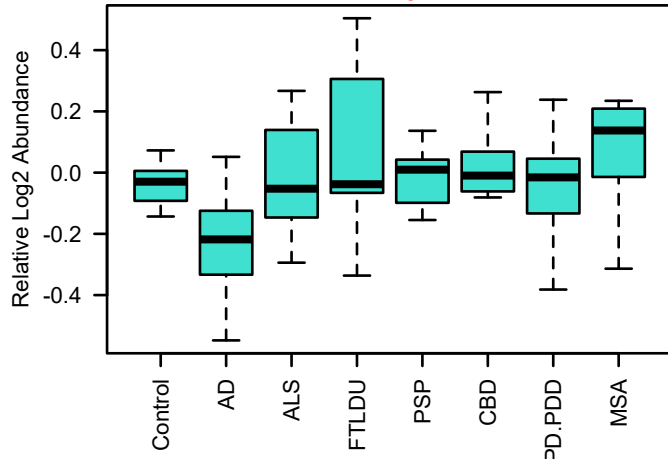

**PCDH1 UPenn Mixed PRM**  
**K-W ANOVA p: 9.4e-06**

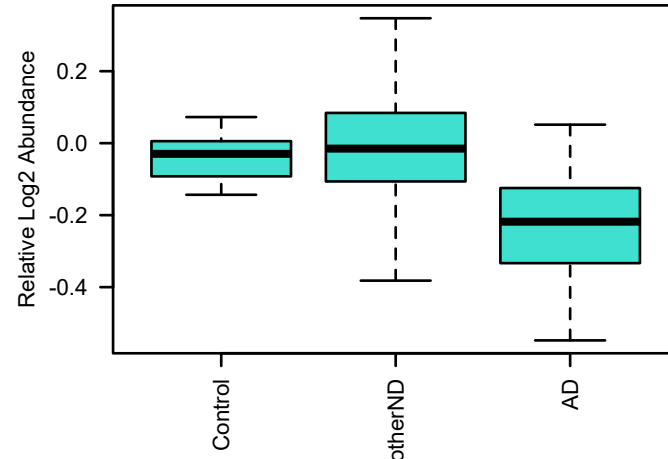

**bicor=-0.25, p=0.021**  
**cor=-0.29, p=0.0075**

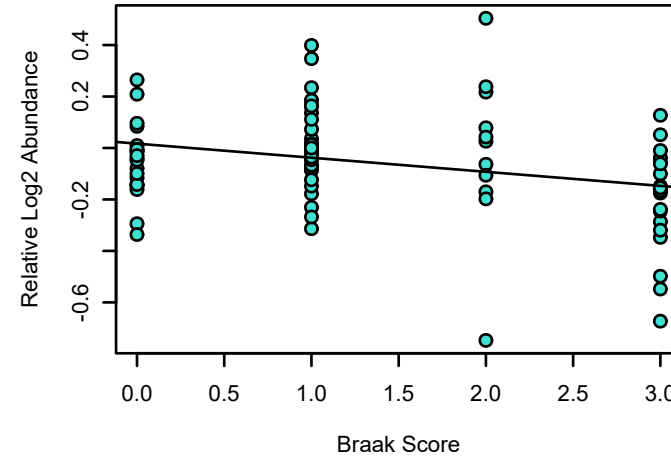

**bicor=-0.33, p=0.00093**  
**cor=-0.36, p=0.00023**

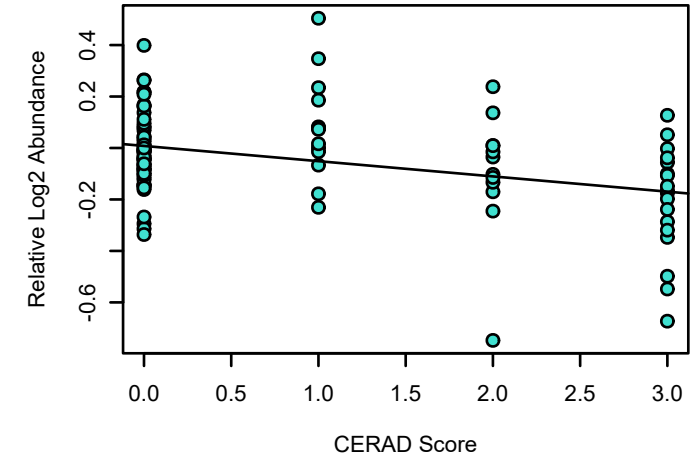

**SEPT11 UPenn Mixed PRM**  
**M1 turquoise MEGA module member**  
**K-W ANOVA p: 0.06**

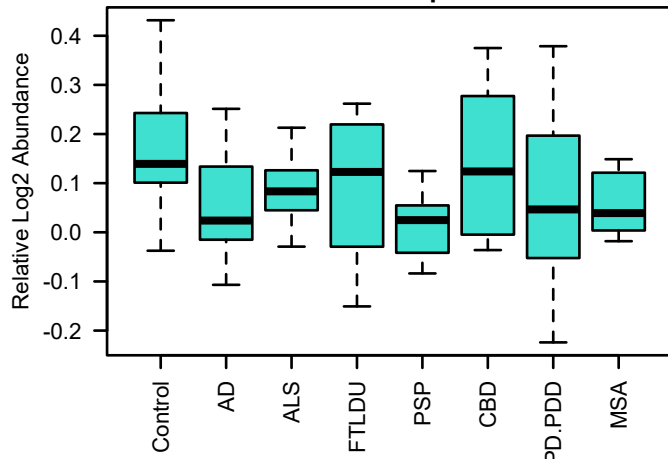

**SEPT11 UPenn Mixed PRM**  
**K-W ANOVA p: 0.027**

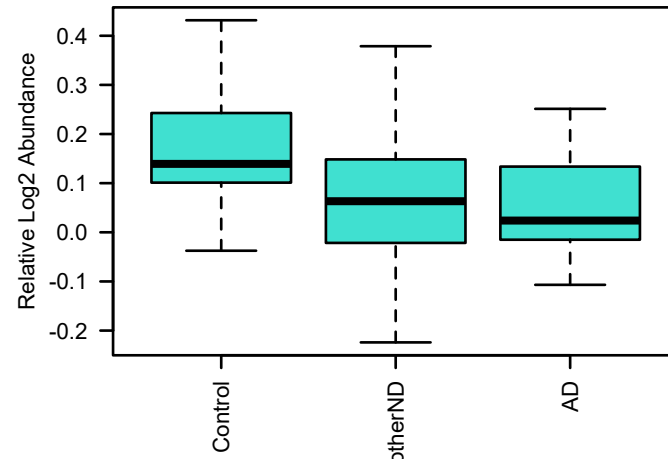

**bicor=-0.14, p=0.19**  
**cor=-0.12, p=0.28**

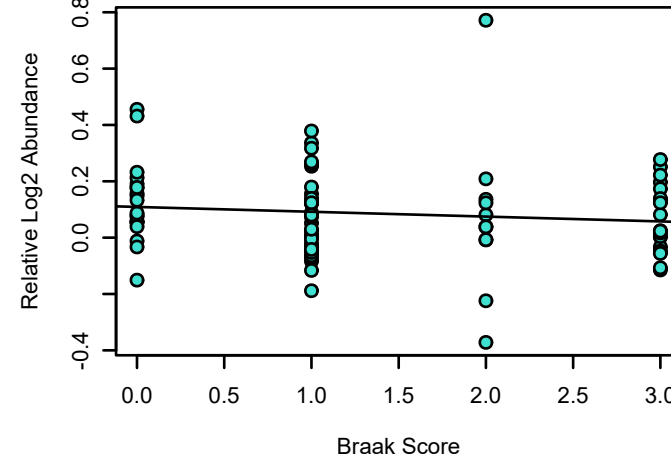

**bicor=-0.11, p=0.3**  
**cor=-0.11, p=0.28**

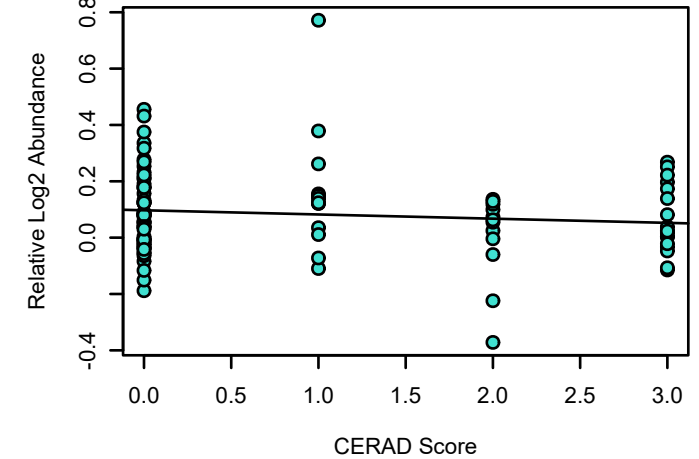

**DNM3 UPenn Mixed PRM**  
**M3 brown MEGA module member**  
**K-W ANOVA p: 0.015**

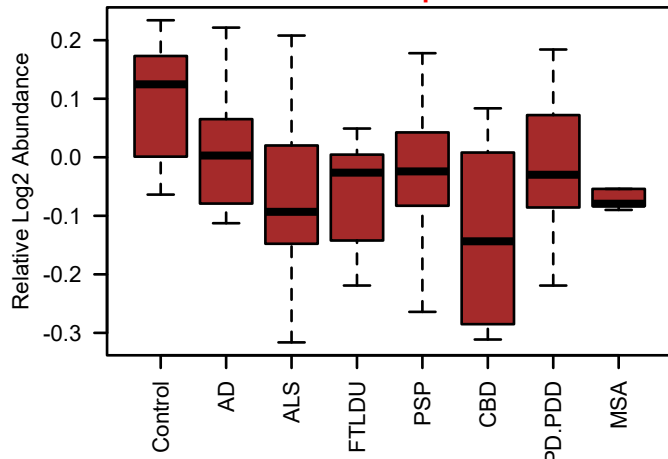

**DNM3 UPenn Mixed PRM**  
**K-W ANOVA p: 0.00075**

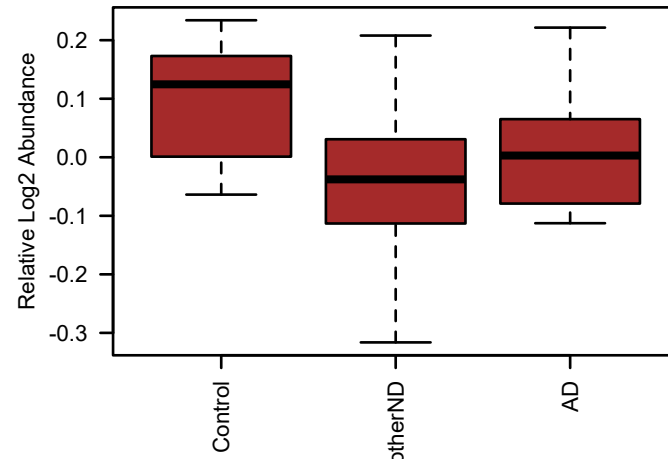

**bicor=-0.13, p=0.26**  
**cor=-0.13, p=0.24**

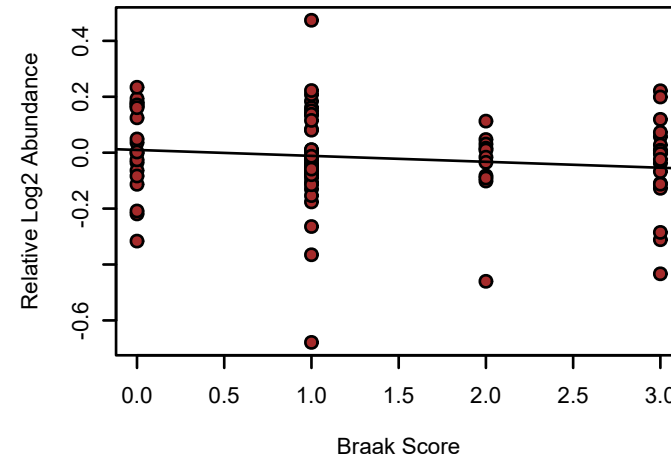

**bicor=-0.058, p=0.57**  
**cor=-0.1, p=0.32**

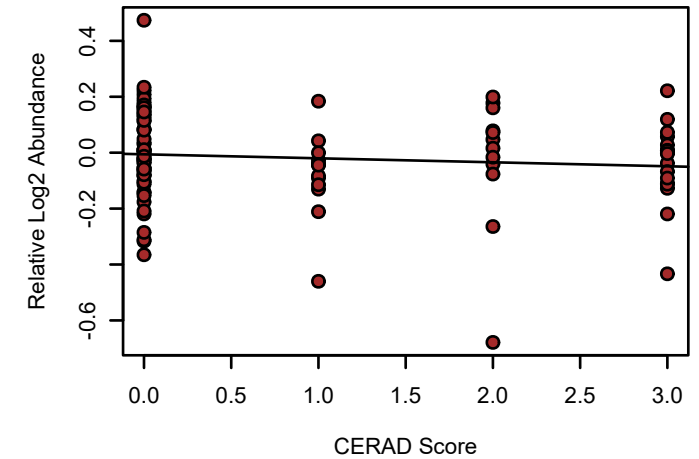

**ERLIN2 UPenn Mixed PRM**  
M4 yellow MEGA module member  
K-W ANOVA p: 6.3e-05

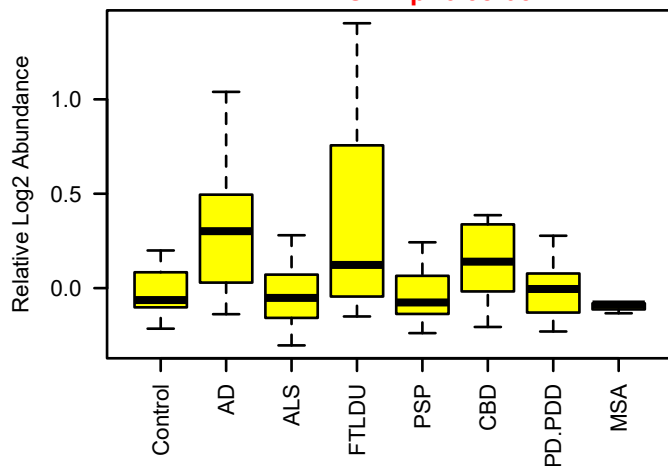

**ERLIN2 UPenn Mixed PRM**  
K-W ANOVA p: 0.00073

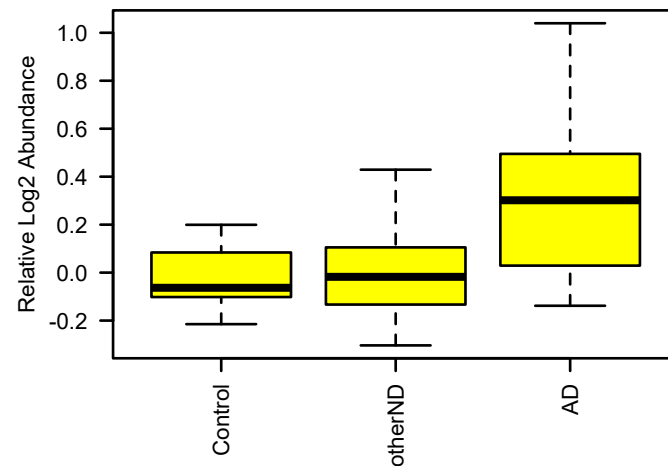

**bicor=0.32, p=0.0027**  
**cor=0.3, p=0.0056**

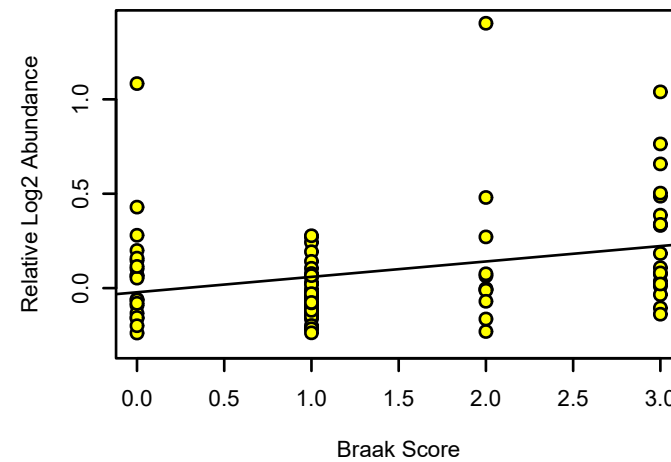

**bicor=0.17, p=0.083**  
**cor=0.22, p=0.028**

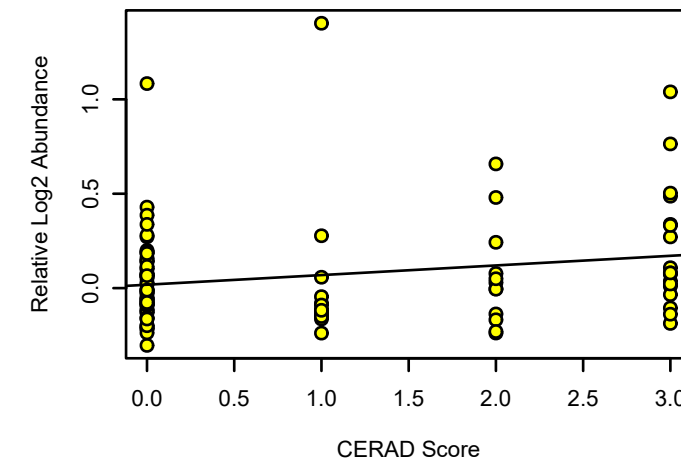

**SNCA UPenn Mixed PRM**  
M6 red MEGA module member  
K-W ANOVA p: 3.6e-05

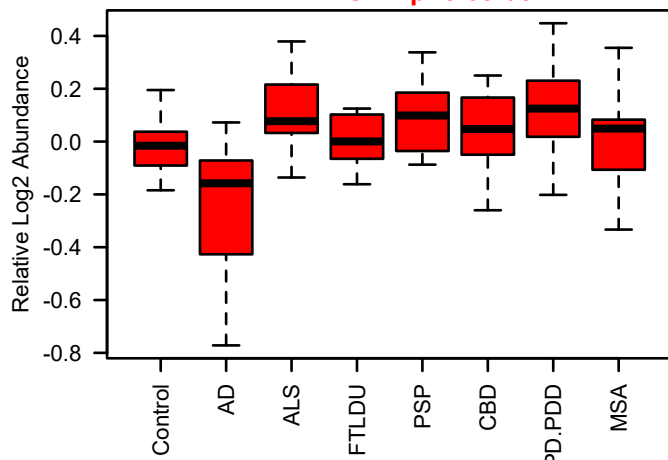

**SNCA UPenn Mixed PRM**  
K-W ANOVA p: 2.3e-07

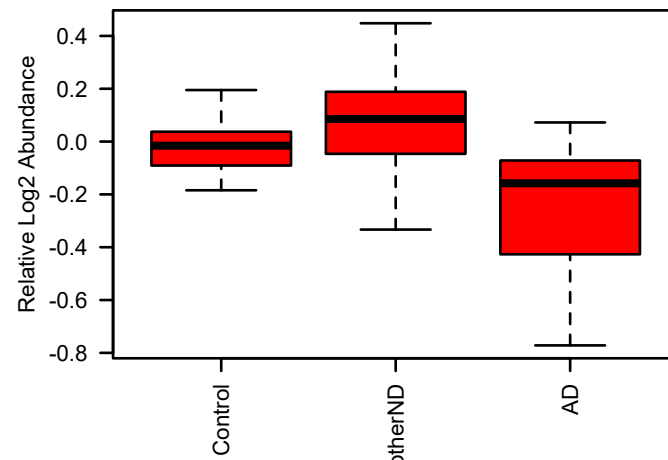

**bicor=-0.19, p=0.082**  
**cor=-0.21, p=0.055**

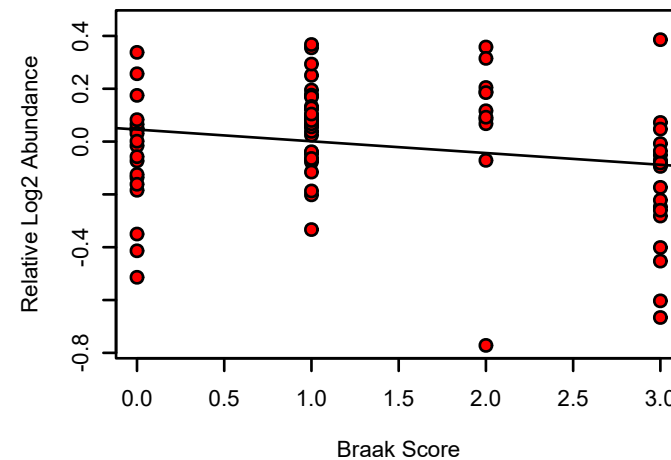

**bicor=-0.19, p=0.061**  
**cor=-0.23, p=0.021**

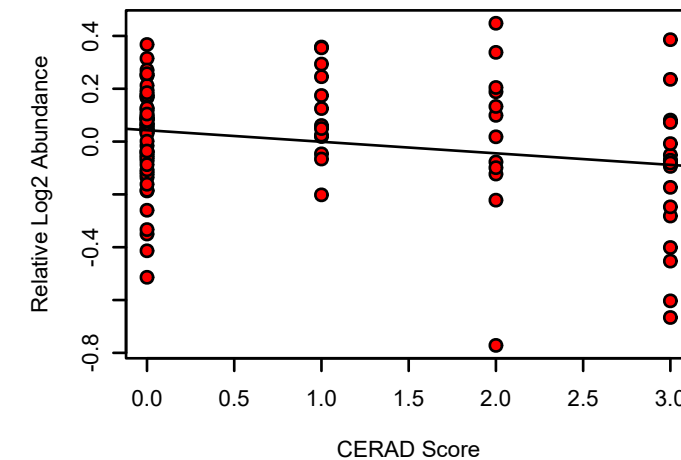

**EZR UPenn Mixed PRM**  
M4 yellow MEGA module member  
K-W ANOVA p: 0.0016

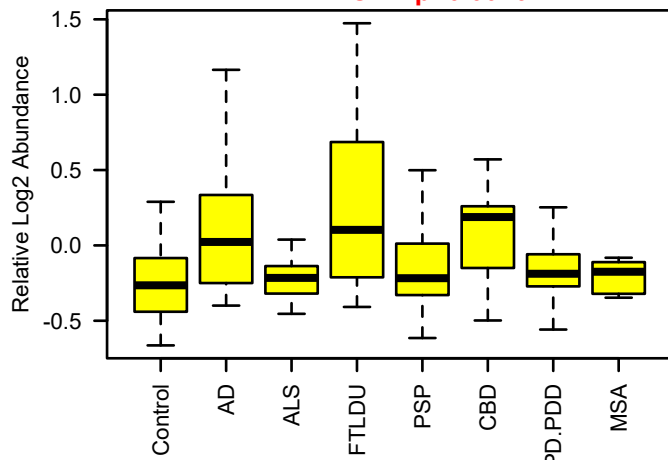

**EZR UPenn Mixed PRM**  
K-W ANOVA p: 0.014

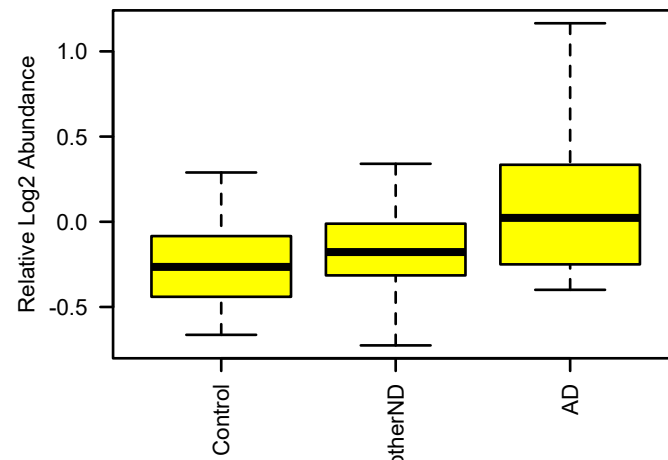

**bicor=0.32, p=0.0027**  
**cor=0.29, p=0.0075**

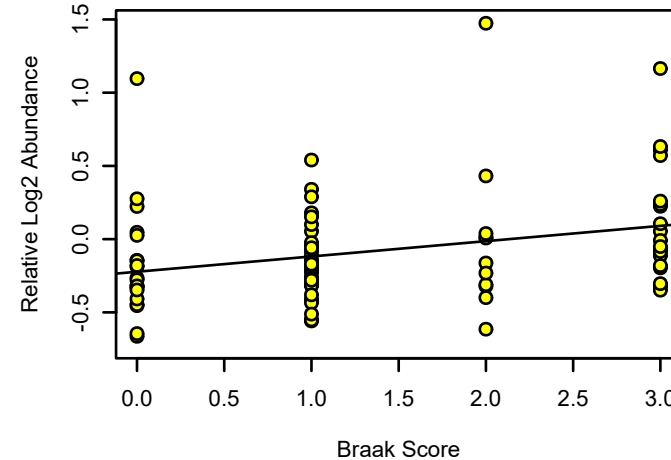

**bicor=0.23, p=0.023**  
**cor=0.23, p=0.021**

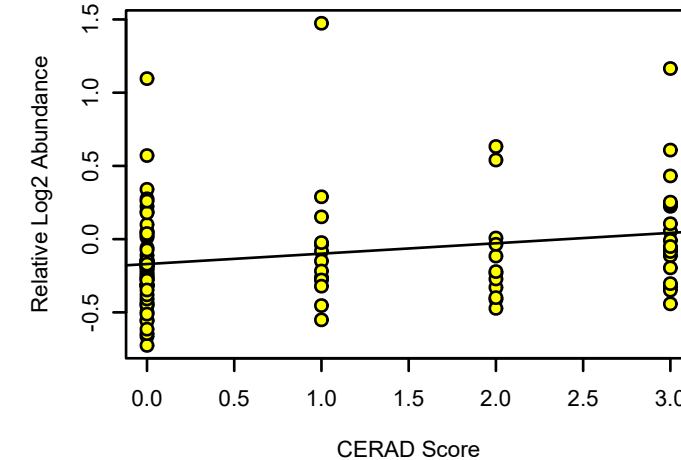

**CAMKV UPenn Mixed PRM**  
M1 turquoise MEGA module member  
K-W ANOVA p: 0.067

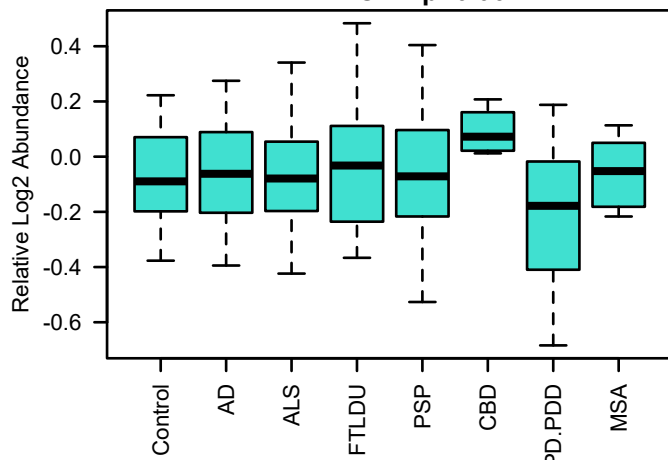

**CAMKV UPenn Mixed PRM**  
K-W ANOVA p: 0.71

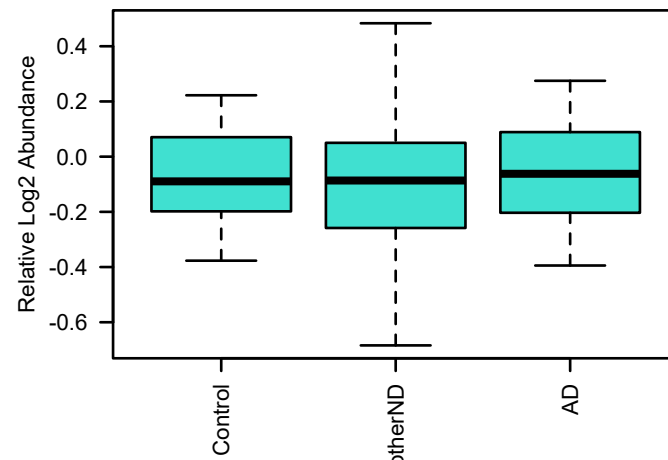

**bicor=0.11, p=0.32**  
**cor=0.12, p=0.28**

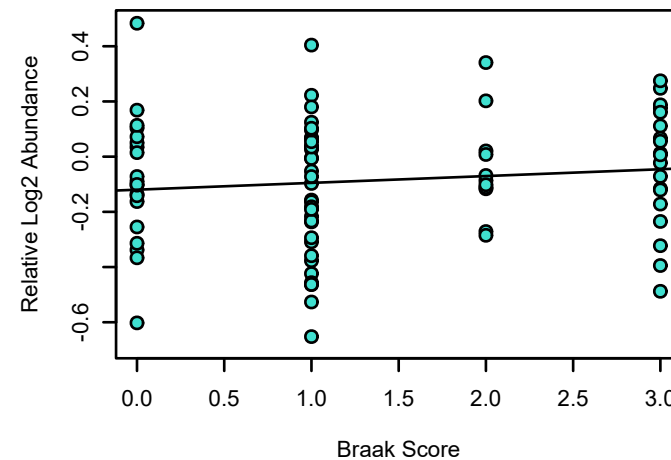

**bicor=-0.078, p=0.44**  
**cor=-0.073, p=0.47**

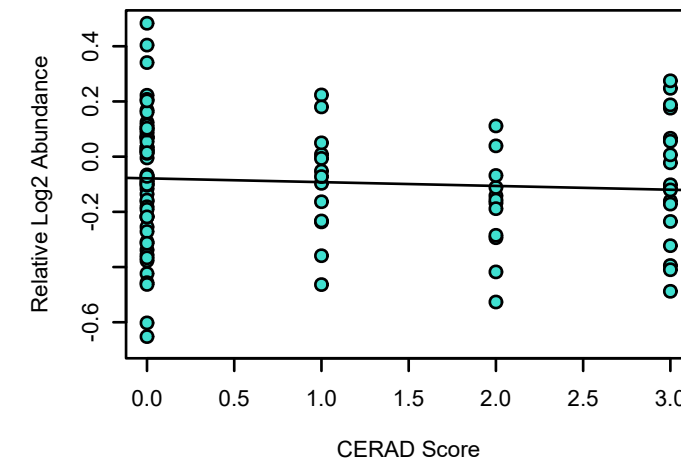

**GABRB2 UPenn Mixed PRM**  
M3 brown MEGA module member  
K-W ANOVA p: 0.063

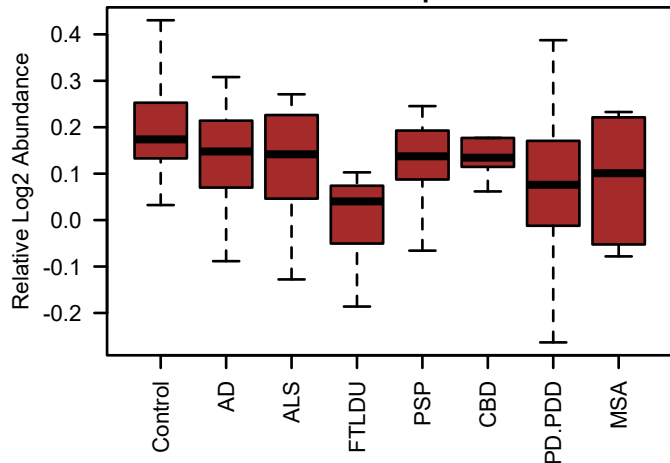

**GABRB2 UPenn Mixed PRM**  
K-W ANOVA p: 0.022

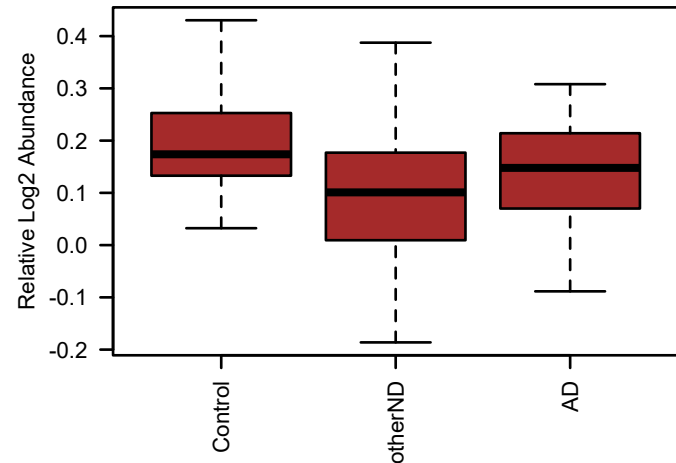

**bicor=-0.12, p=0.28**  
**cor=-0.11, p=0.32**

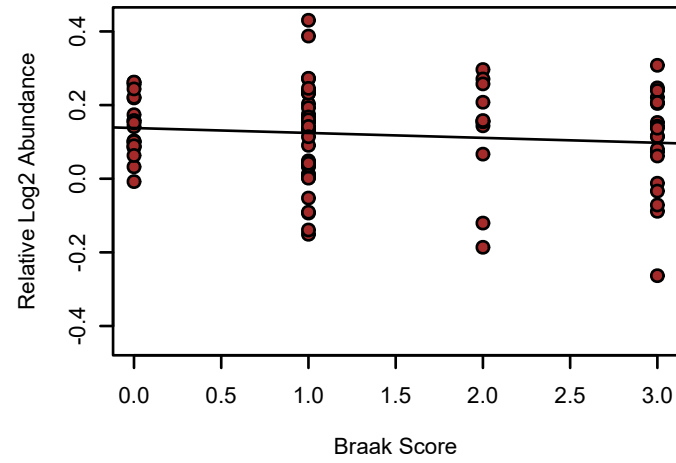

**bicor=-0.1, p=0.3**  
**cor=-0.11, p=0.28**

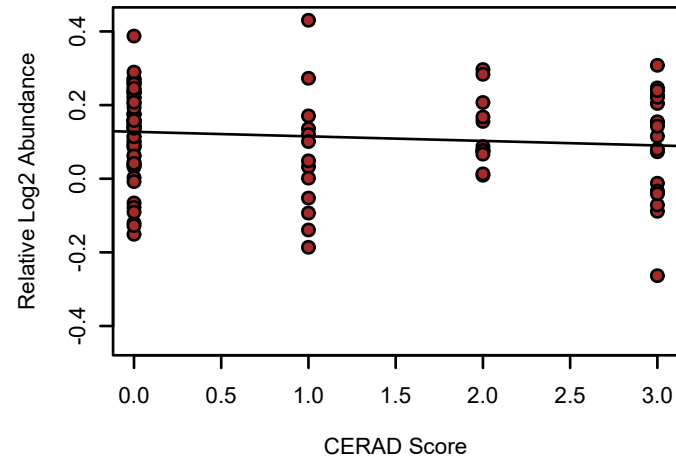

**CYFIP2 UPenn Mixed PRM**  
M1 turquoise MEGA module member  
K-W ANOVA p: 0.17

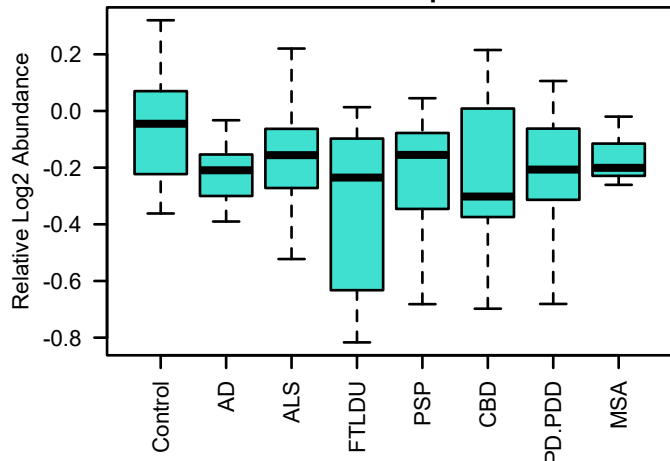

**CYFIP2 UPenn Mixed PRM**  
K-W ANOVA p: 0.049

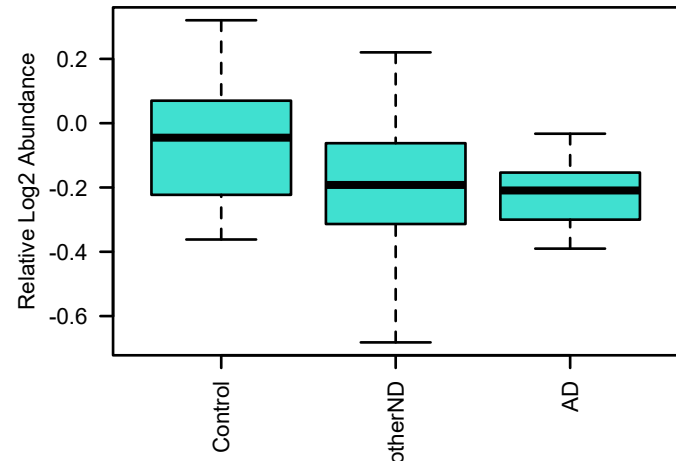

**bicor=-0.2, p=0.068**  
**cor=-0.21, p=0.055**

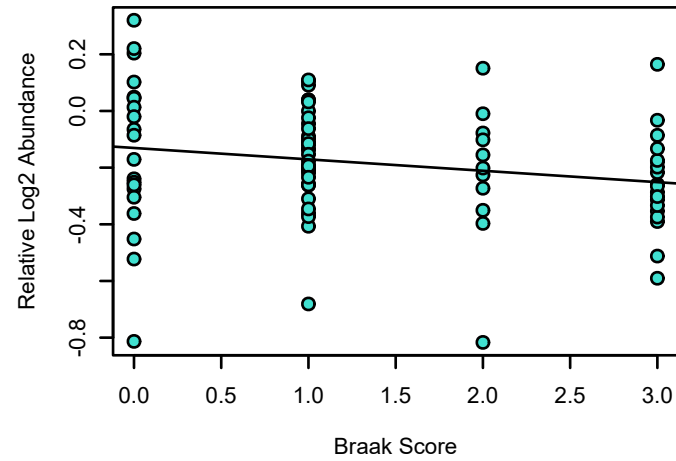

**bicor=0.0034, p=0.97**  
**cor=0.0047, p=0.96**

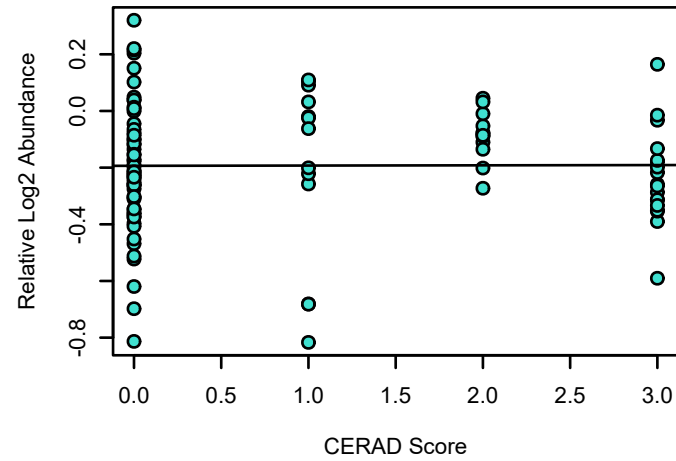

**CAMK2D UPenn Mixed PRM**  
NA grey MEGA module member  
K-W ANOVA p: 0.024

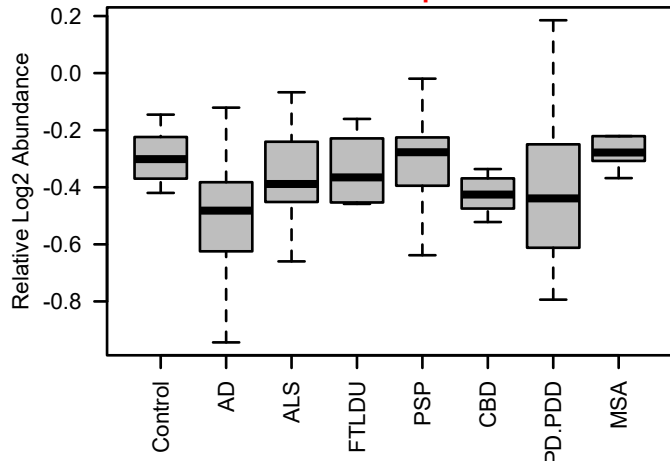

**CAMK2D UPenn Mixed PRM**  
K-W ANOVA p: 0.03

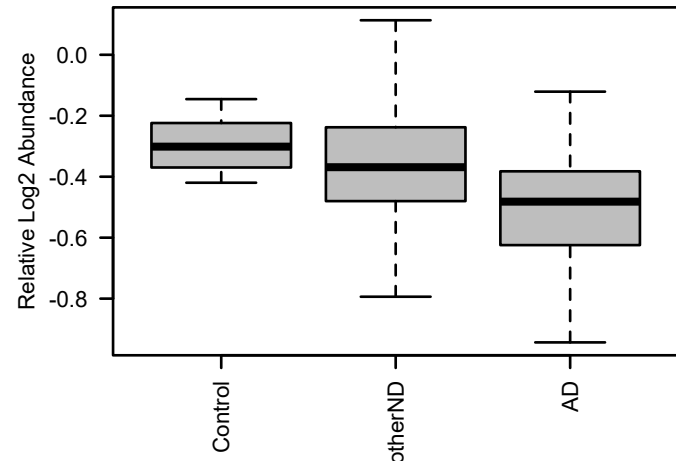

**bicor=-0.29, p=0.0078**  
**cor=-0.28, p=0.0099**

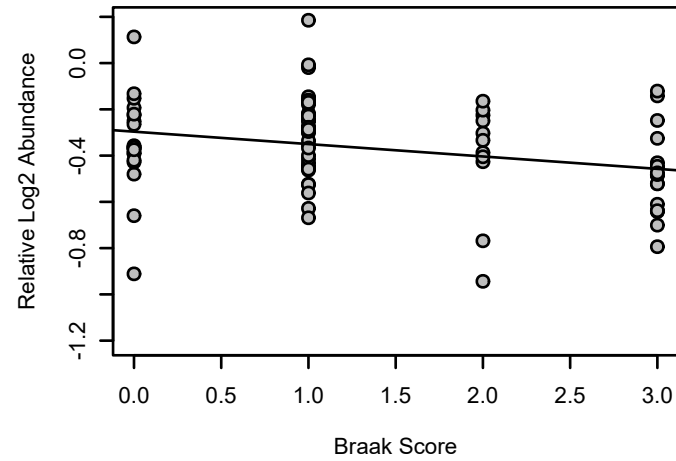

**bicor=-0.2, p=0.049**  
**cor=-0.18, p=0.073**

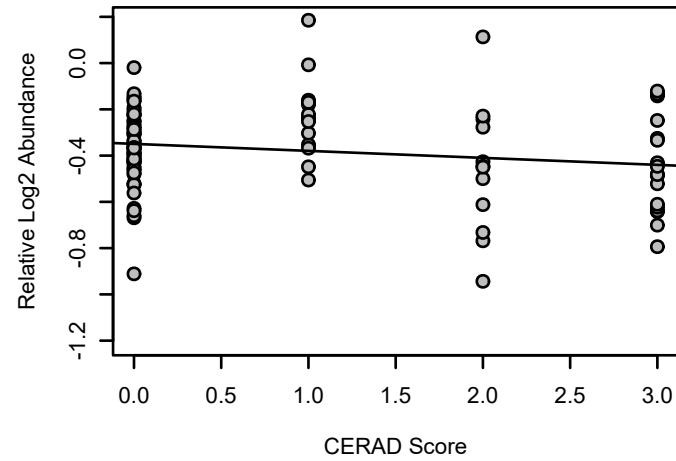

**AGK UPenn Mixed PRM**  
M1 turquoise MEGA module member  
K-W ANOVA p: 0.019

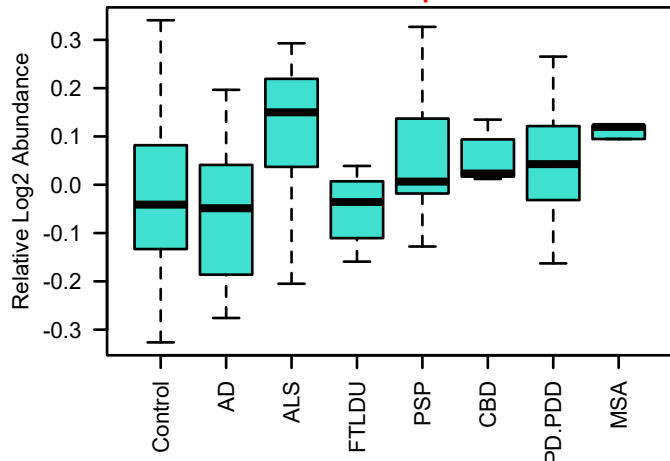

**AGK UPenn Mixed PRM**  
K-W ANOVA p: 0.004

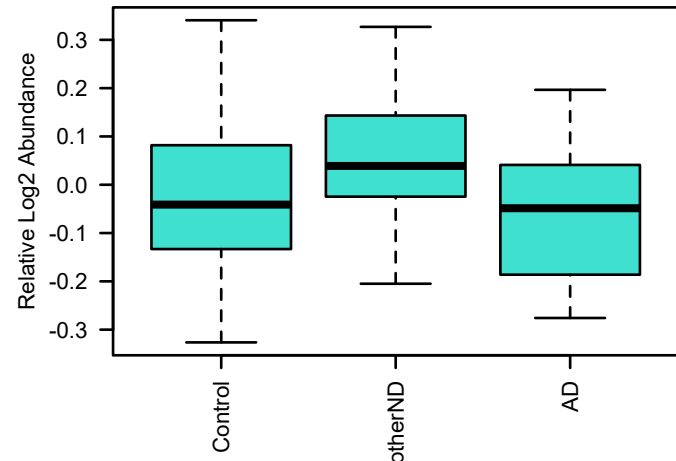

**bicor=-0.083, p=0.45**  
**cor=-0.12, p=0.28**

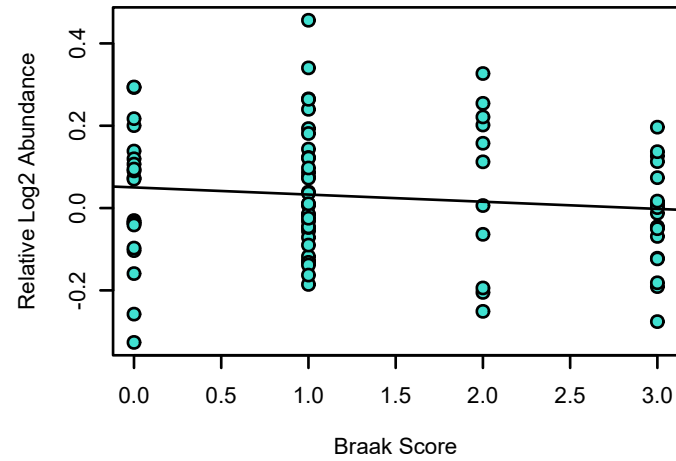

**bicor=-0.078, p=0.44**  
**cor=-0.067, p=0.51**

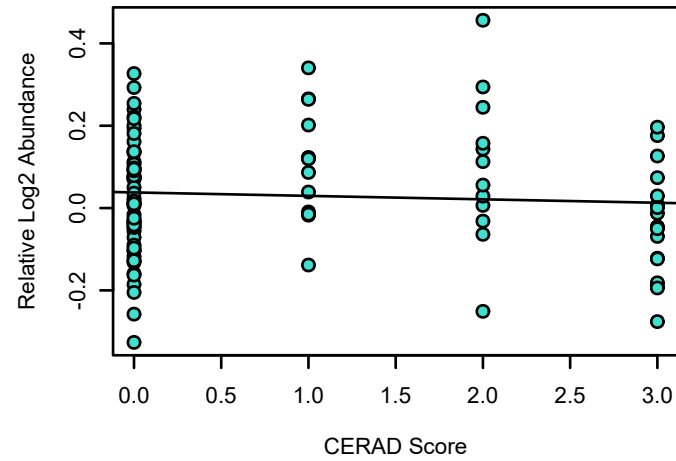

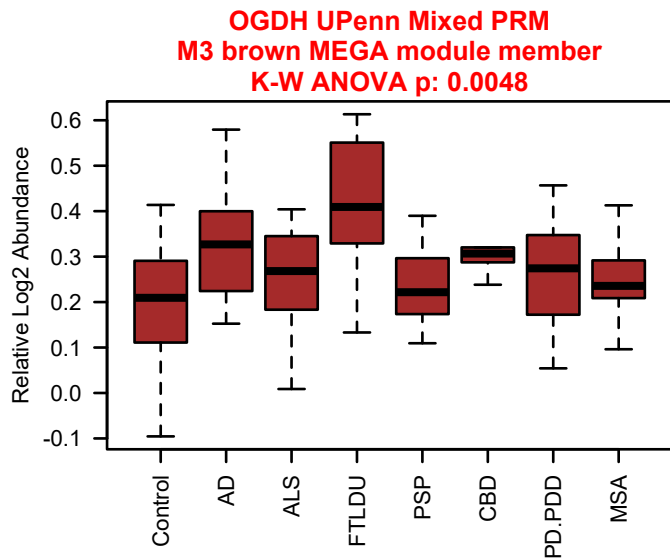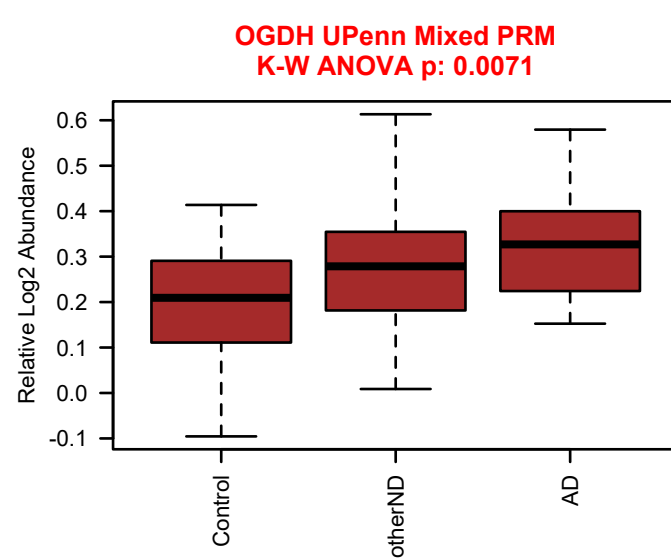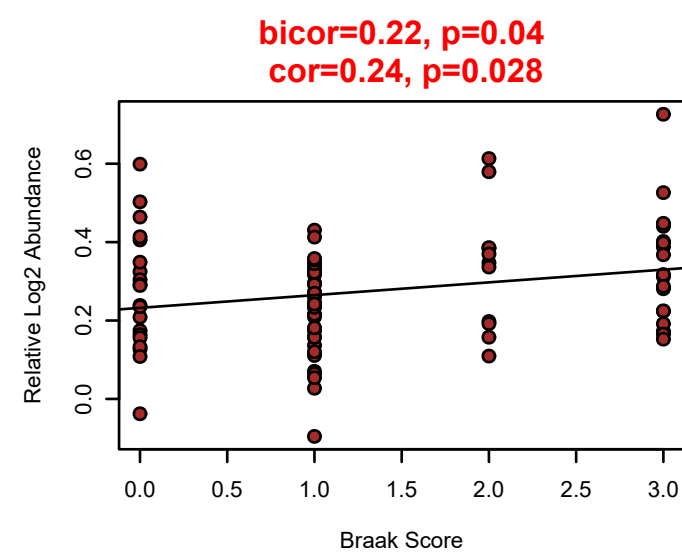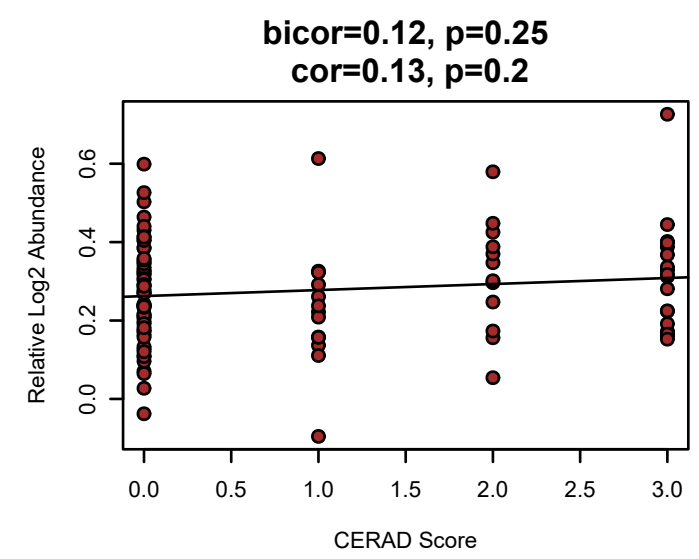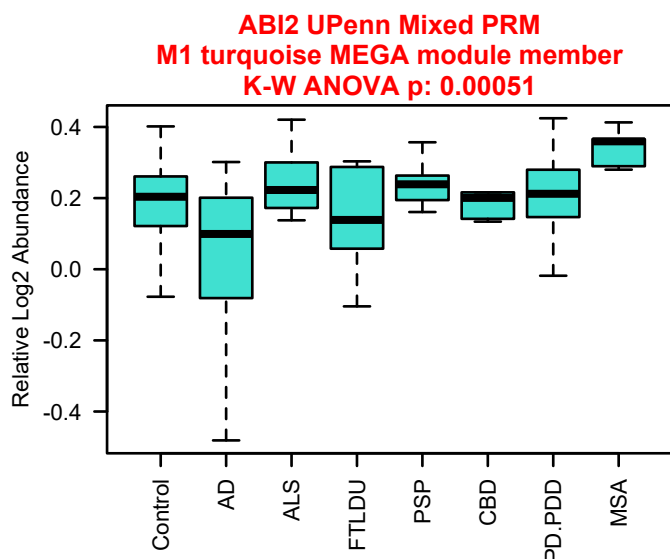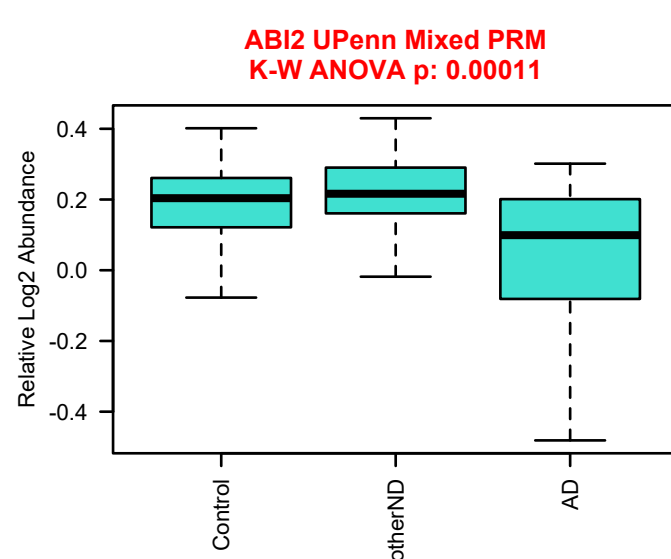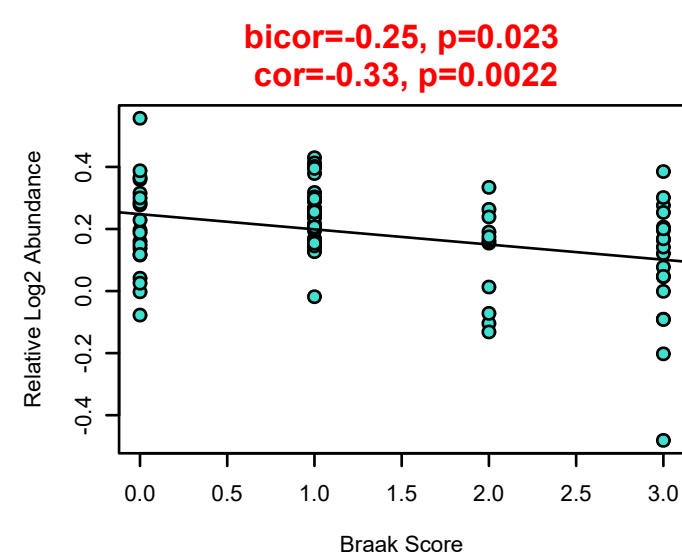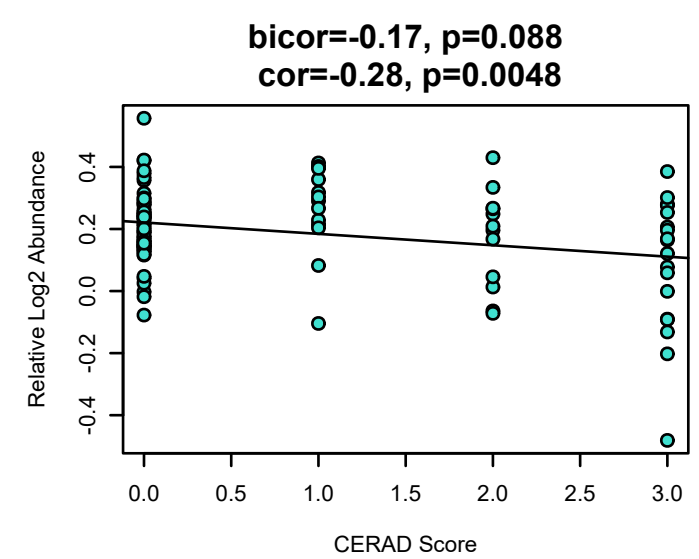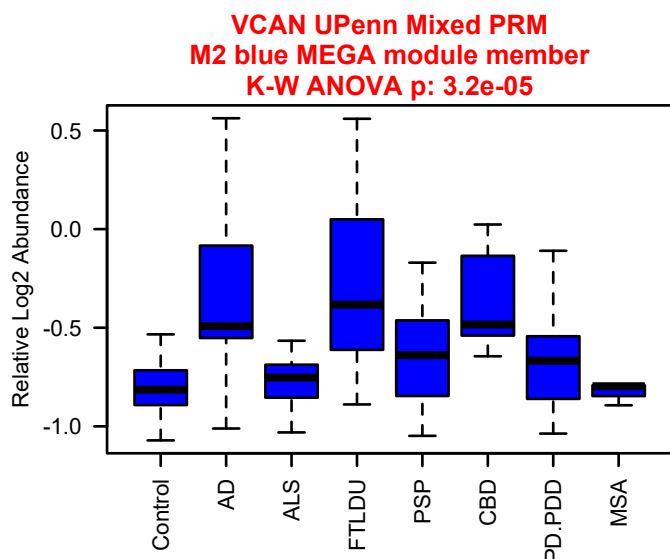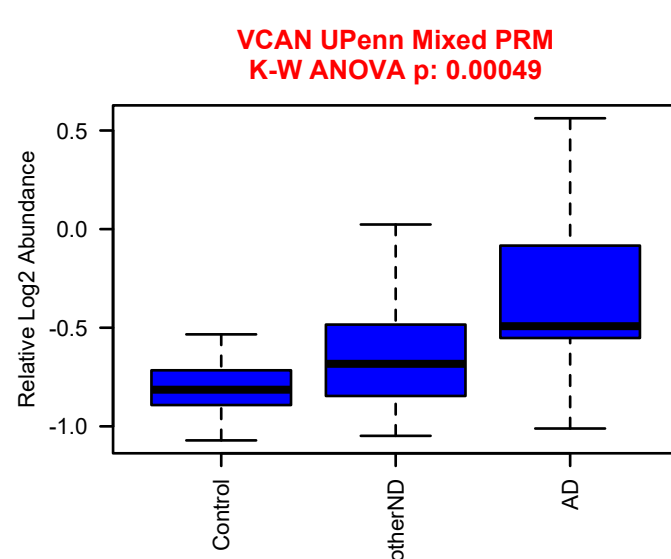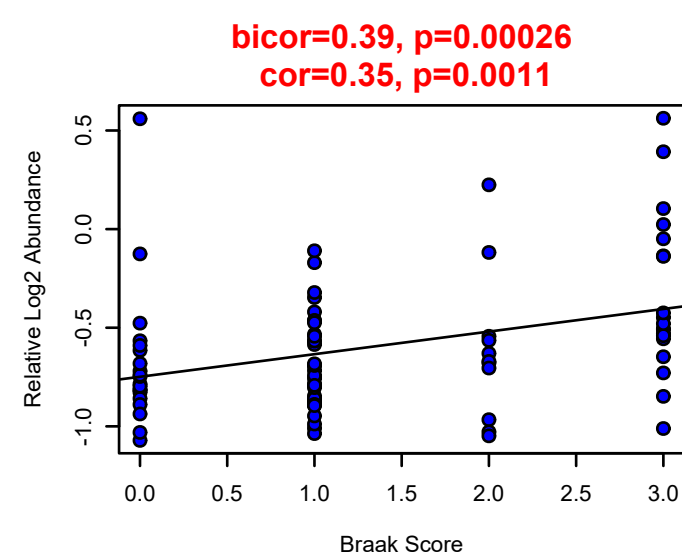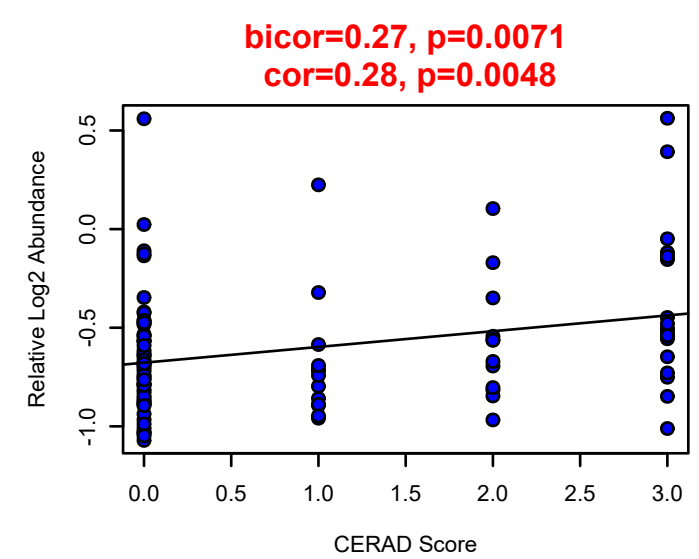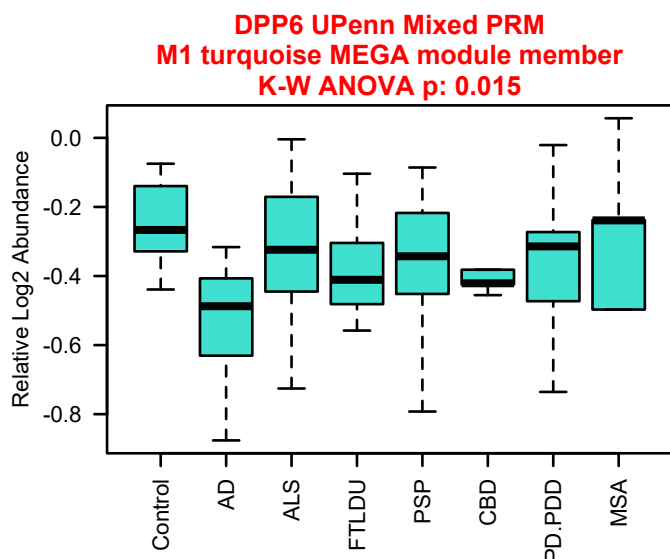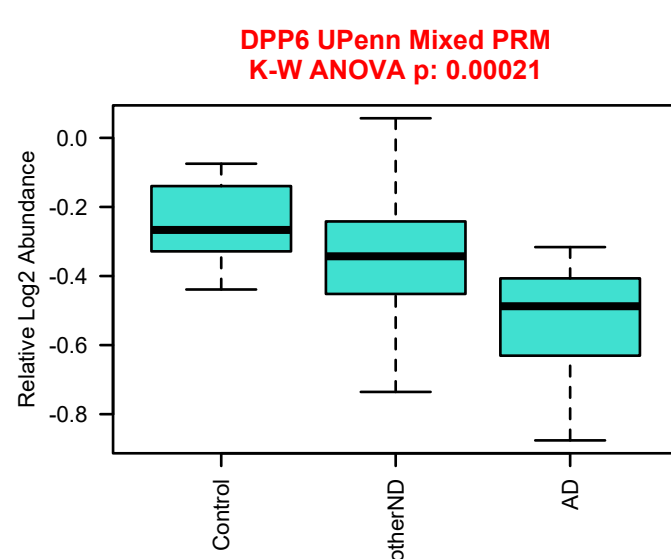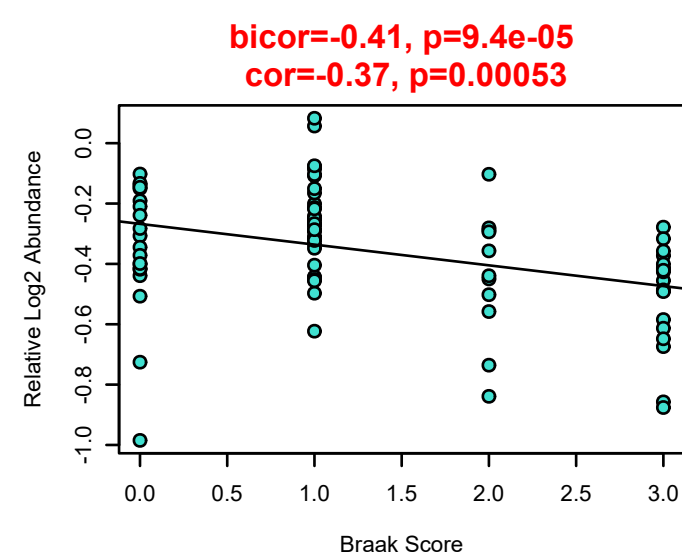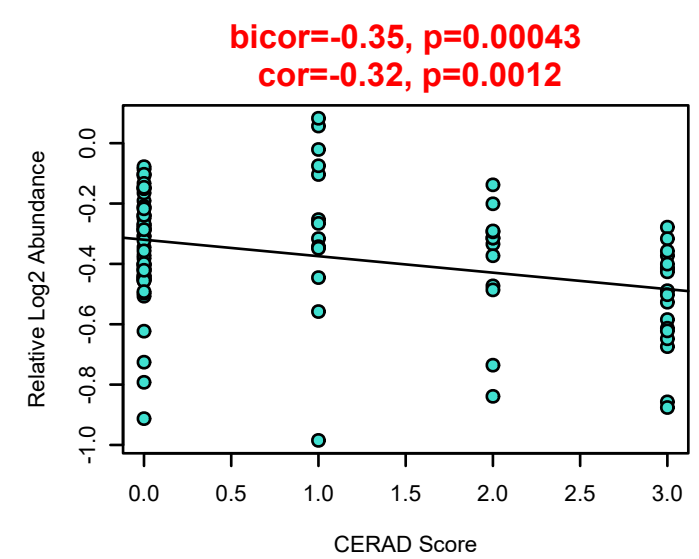

**CD81 UPenn Mixed PRM**  
M12 tan MEGA module member  
K-W ANOVA p: 0.13

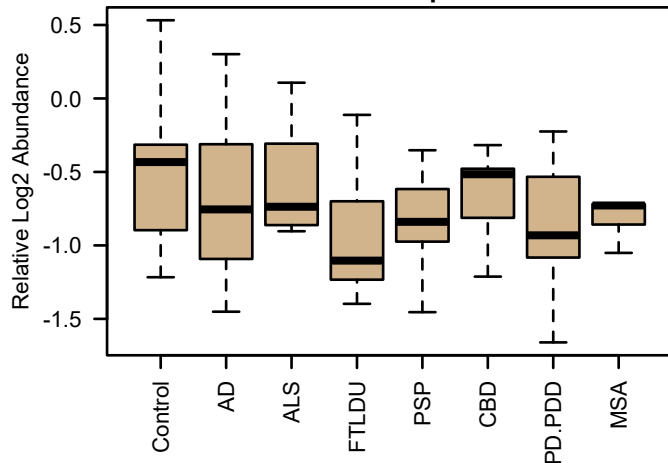

**CD81 UPenn Mixed PRM**  
K-W ANOVA p: 0.1

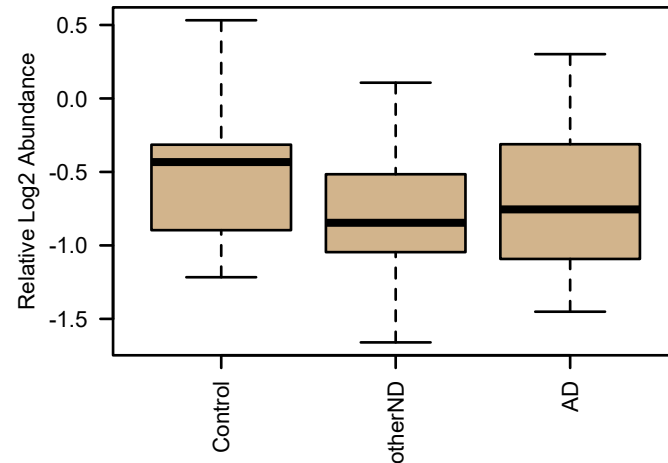

**bicor=-0.0055, p=0.96**  
**cor=-0.051, p=0.65**

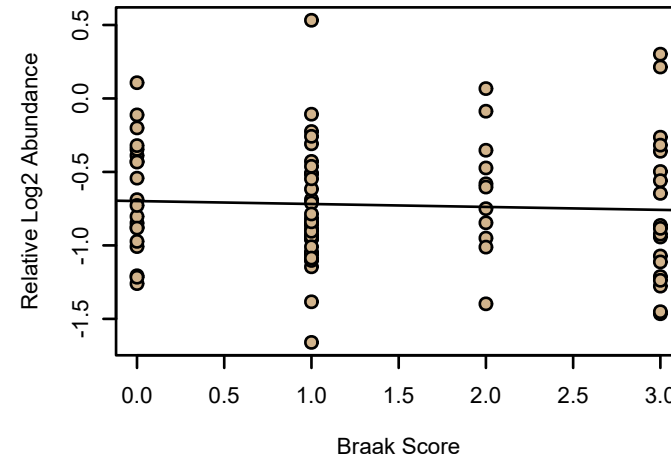

**bicor=-0.13, p=0.21**  
**cor=-0.086, p=0.39**

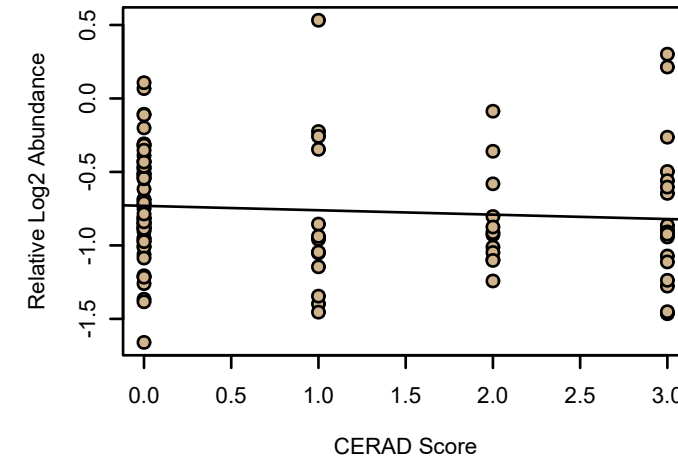

**NPEPPS UPenn Mixed PRM**  
M4 yellow MEGA module member  
K-W ANOVA p: 1.3e-05

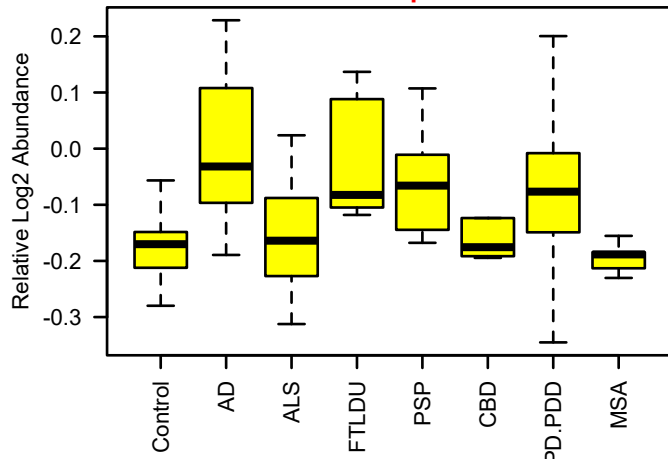

**NPEPPS UPenn Mixed PRM**  
K-W ANOVA p: 0.00054

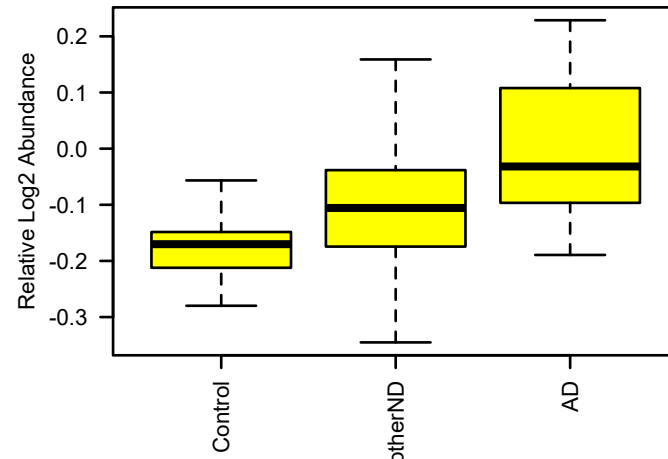

**bicor=0.37, p=0.00054**  
**cor=0.37, p=0.00053**

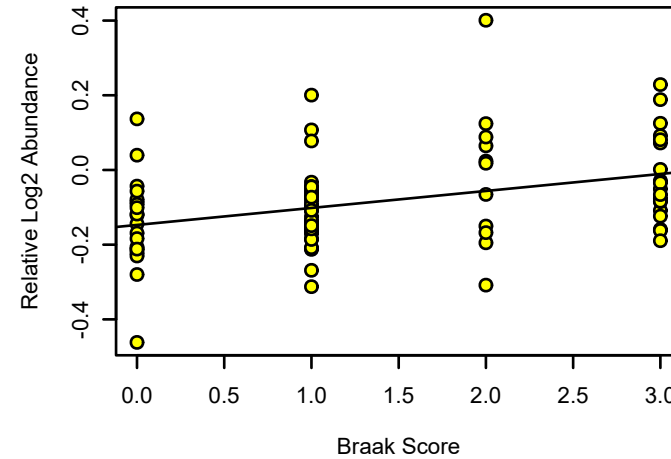

**bicor=0.39, p=6.5e-05**  
**cor=0.36, p=0.00023**

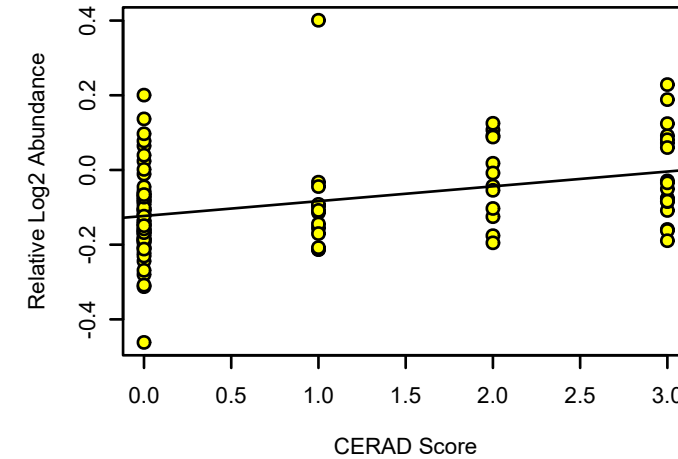

**NPEPPSL1 UPenn Mixed PRM**  
NA grey20 MEGA module member  
K-W ANOVA p: 0.016

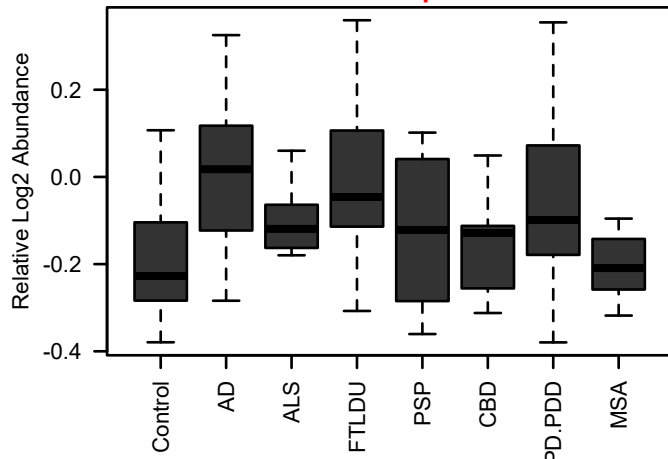

**NPEPPSL1 UPenn Mixed PRM**  
K-W ANOVA p: 0.0073

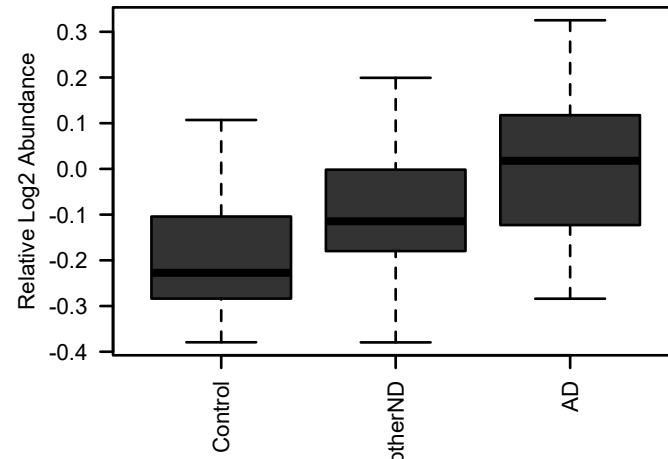

**bicor=0.27, p=0.015**  
**cor=0.27, p=0.013**

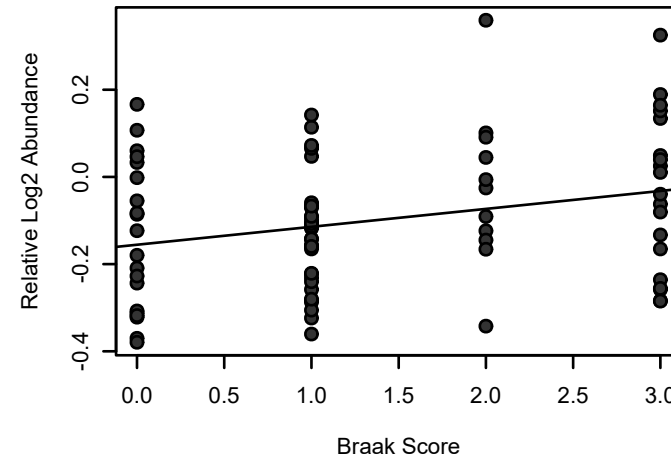

**bicor=0.32, p=0.0012**  
**cor=0.33, p=8e-04**

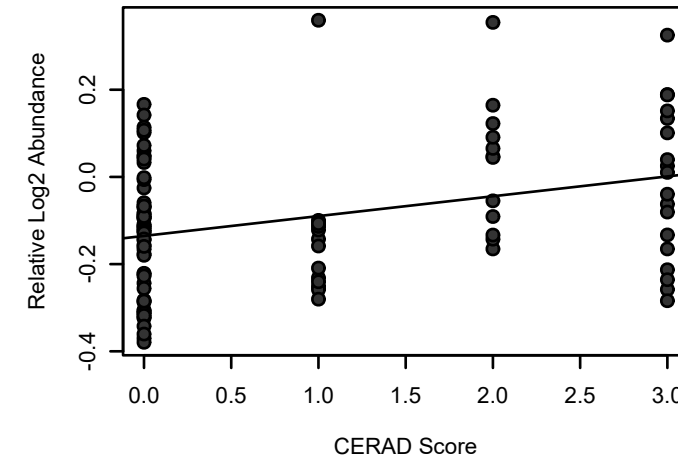

**NDUFS8 UPenn Mixed PRM**  
M3 brown MEGA module member  
K-W ANOVA p: 0.0011

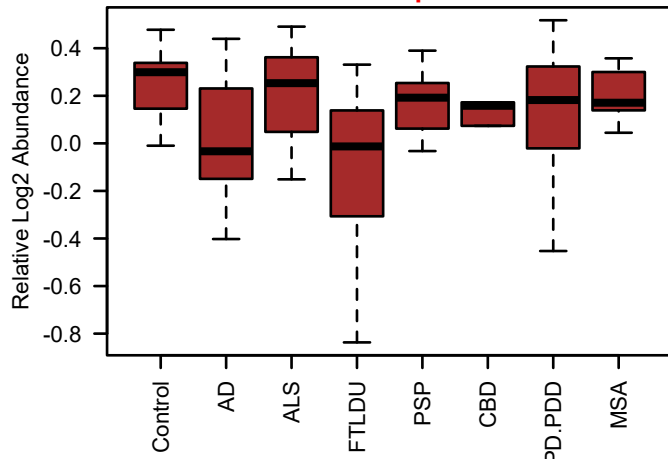

**NDUFS8 UPenn Mixed PRM**  
K-W ANOVA p: 0.0065

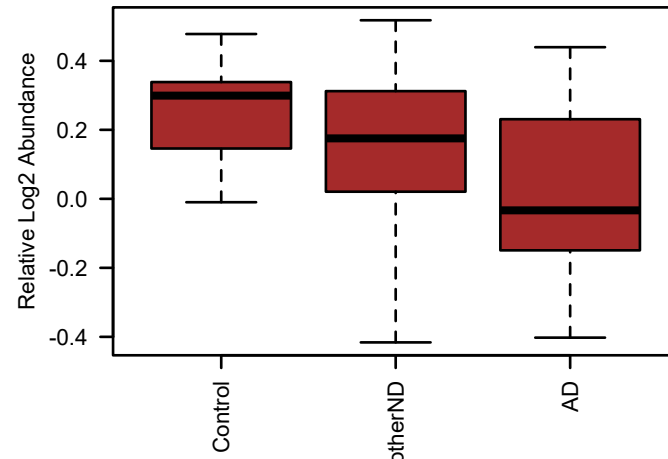

**bicor=-0.27, p=0.012**  
**cor=-0.25, p=0.022**

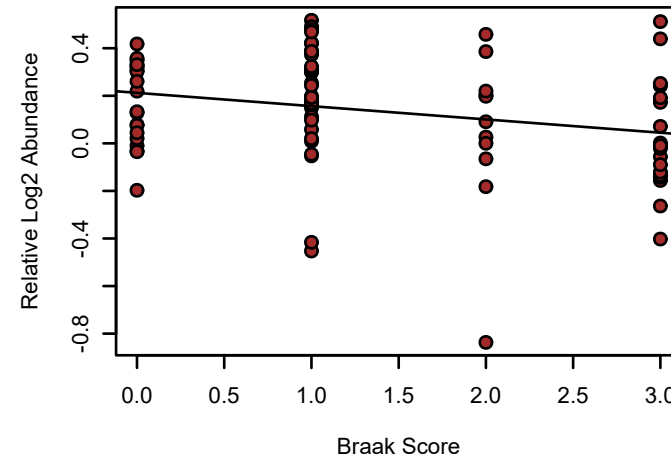

**bicor=-0.27, p=0.0074**  
**cor=-0.24, p=0.016**

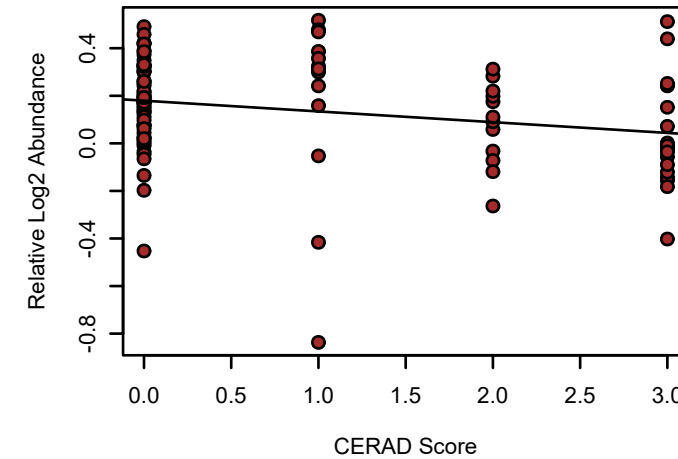

**MAPK3 UPenn Mixed PRM**  
M4 yellow MEGA module member  
K-W ANOVA p: 0.00037

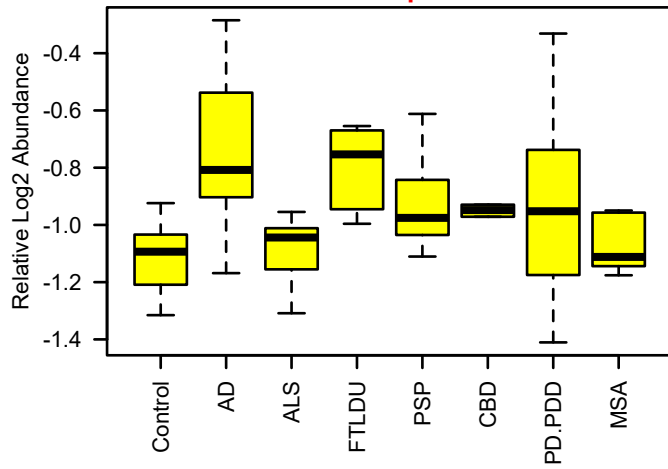

**MAPK3 UPenn Mixed PRM**  
K-W ANOVA p: 0.00034

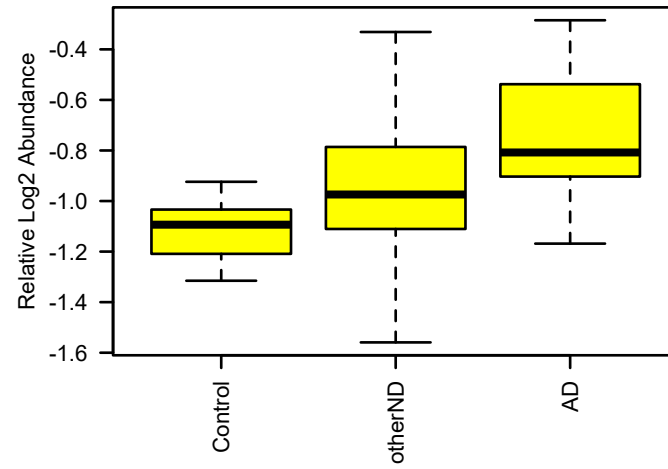

**bicor=0.44, p=2.4e-05**  
**cor=0.42, p=7e-05**

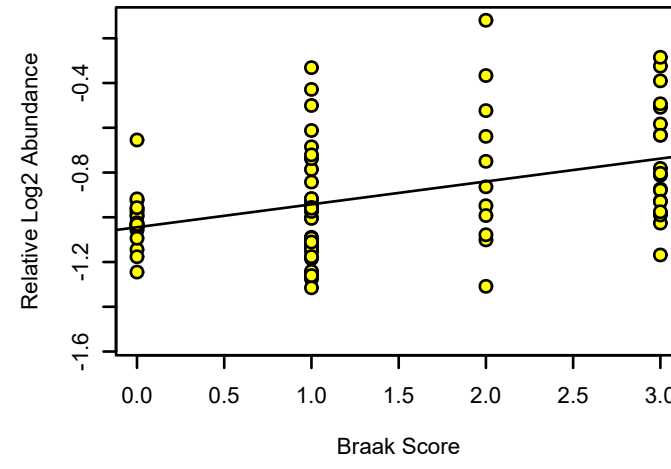

**bicor=0.38, p=9.9e-05**  
**cor=0.35, p=0.00036**

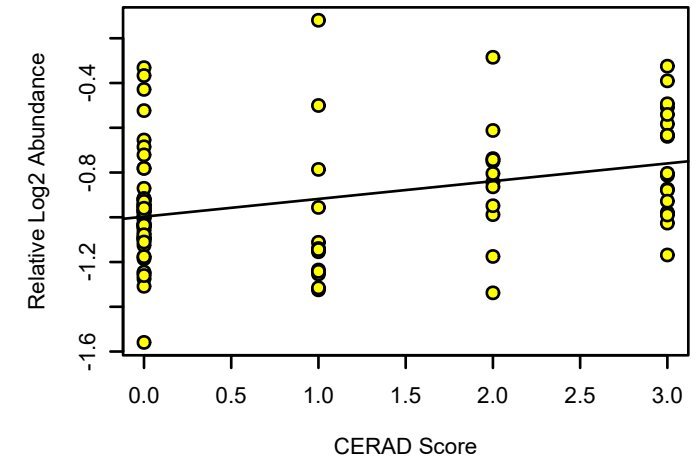

**ABLIM1 UPenn Mixed PRM**  
NA grey MEGA module member  
K-W ANOVA p: 0.0092

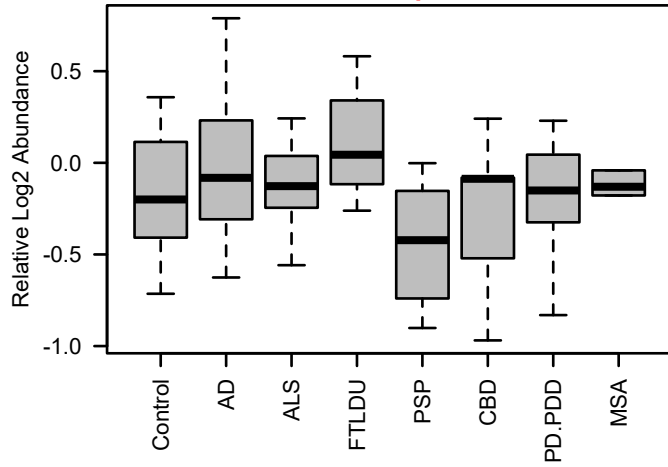

**ABLIM1 UPenn Mixed PRM**  
K-W ANOVA p: 0.22

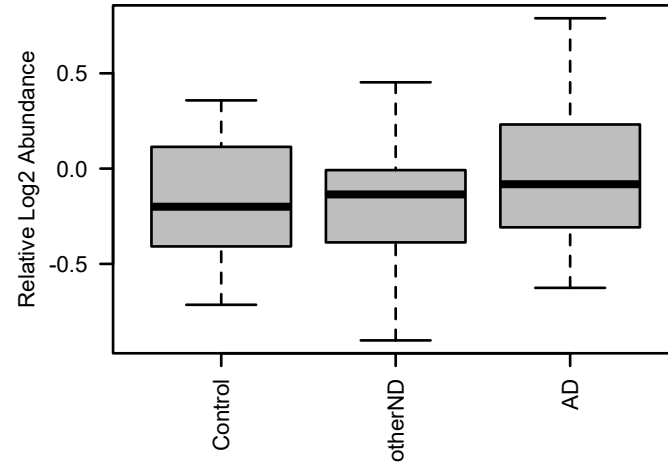

**bicor=0.056, p=0.62**  
**cor=0.085, p=0.44**

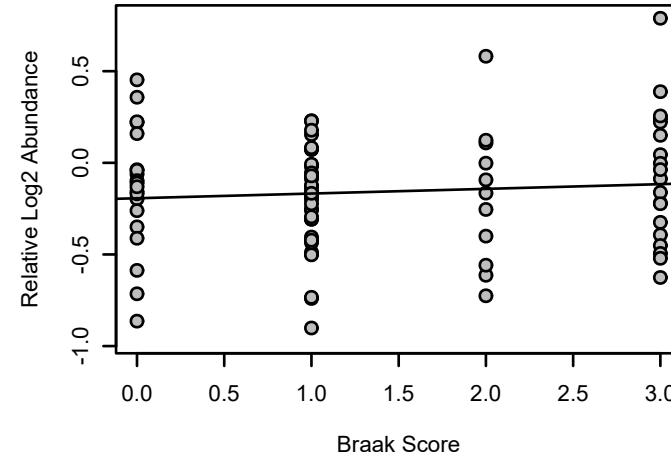

**bicor=0.068, p=0.5**  
**cor=0.078, p=0.44**

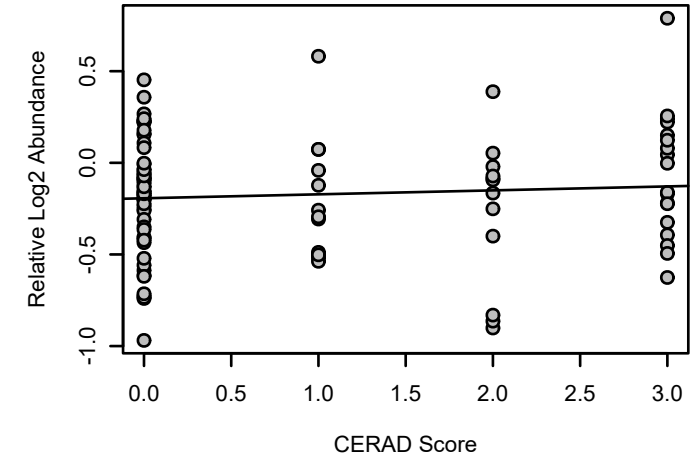

**NDUFV1 UPenn Mixed PRM**  
M3 brown MEGA module member  
K-W ANOVA p: 1.5e-07

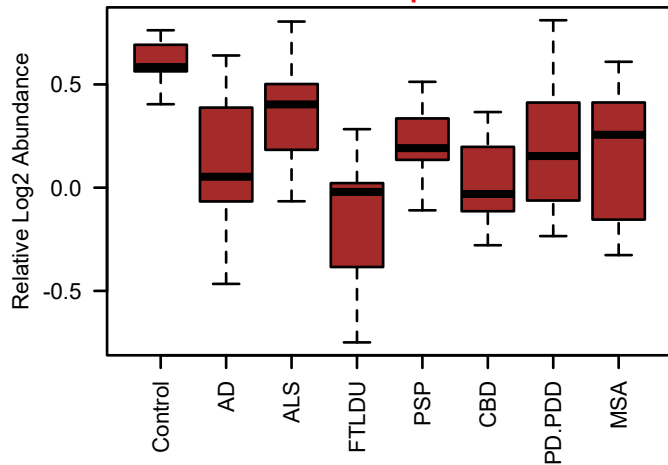

**NDUFV1 UPenn Mixed PRM**  
K-W ANOVA p: 1.7e-06

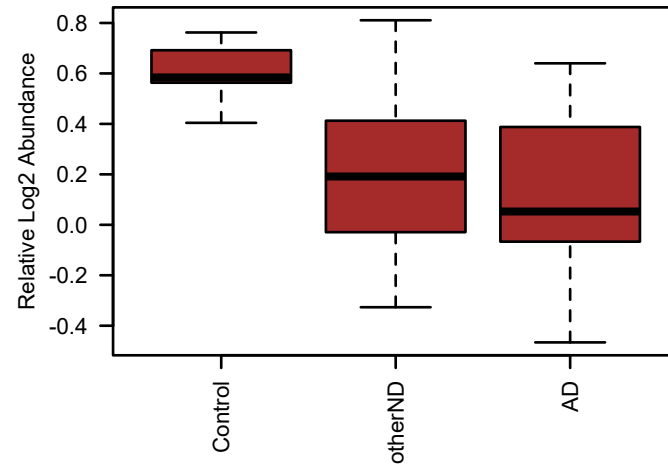

**bicor=-0.32, p=0.0029**  
**cor=-0.3, p=0.0056**

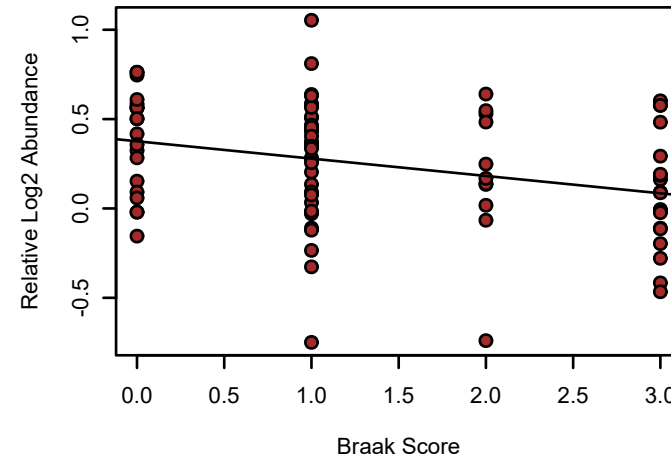

**bicor=-0.25, p=0.011**  
**cor=-0.24, p=0.016**

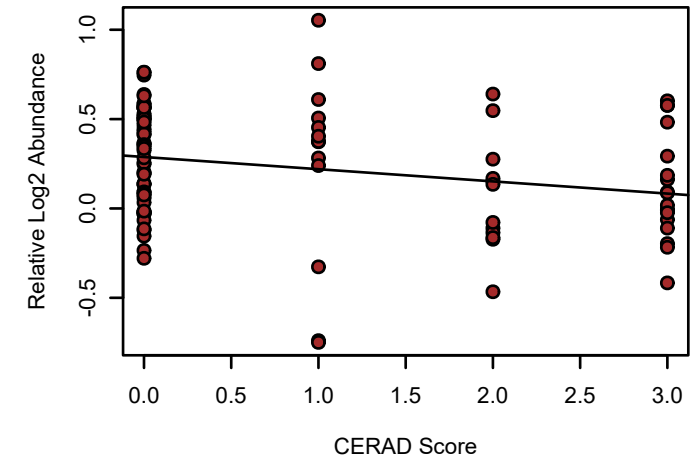

**TUBB4B UPenn Mixed PRM**  
M2 blue MEGA module member  
K-W ANOVA p: 0.48

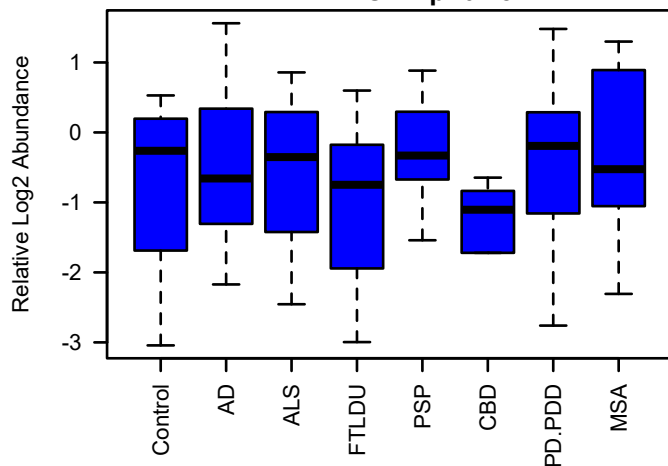

**TUBB4B UPenn Mixed PRM**  
K-W ANOVA p: 0.37

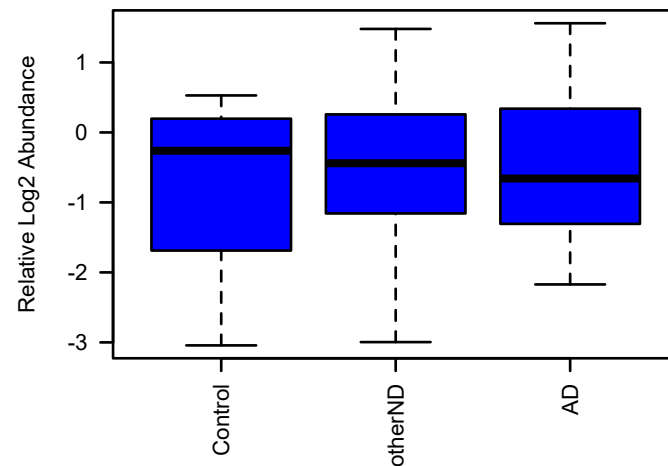

**bicor=0.0096, p=0.93**  
**cor=0.12, p=0.28**

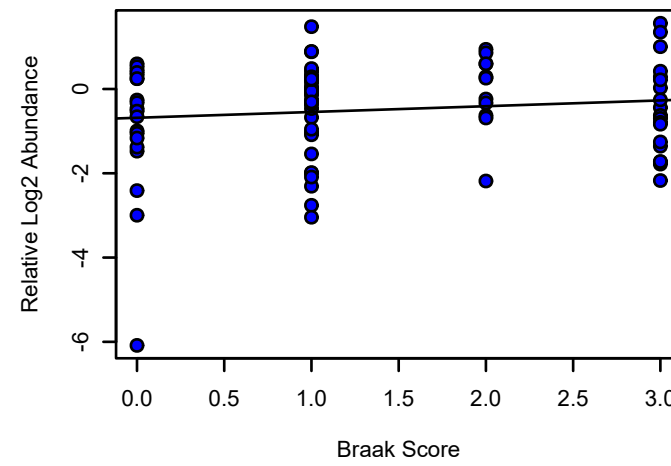

**bicor=0.058, p=0.57**  
**cor=0.1, p=0.32**

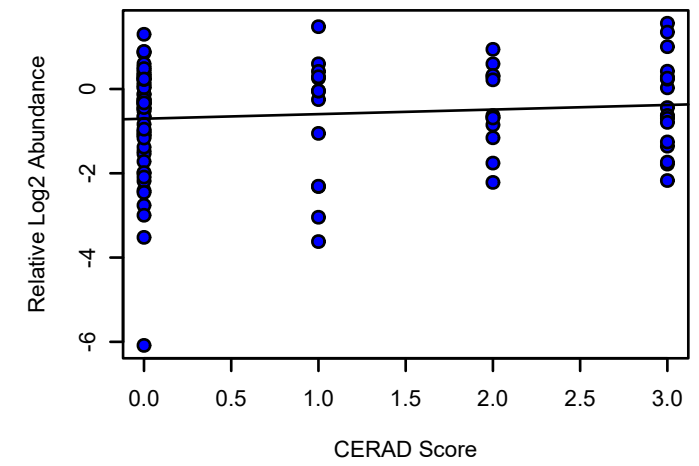

**SEPT5 UPenn Mixed PRM**  
**M1 turquoise MEGA module member**  
**K-W ANOVA p: 8.9e-09**

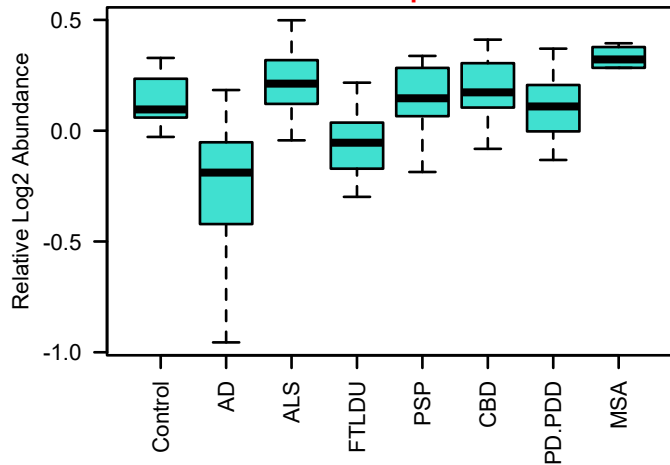

**SEPT5 UPenn Mixed PRM**  
**K-W ANOVA p: 2.2e-09**

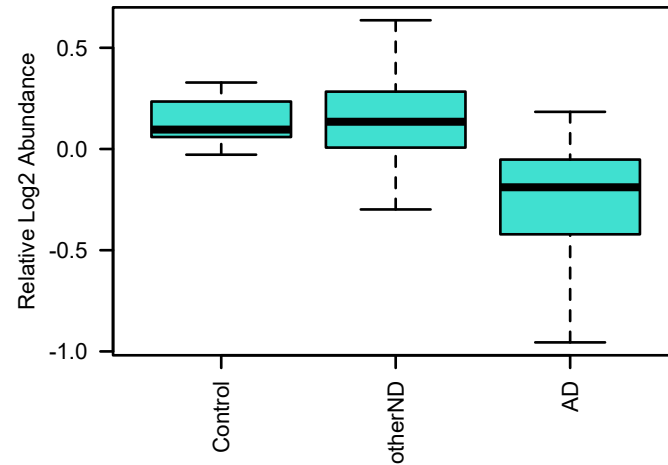

**bicor=-0.38, p=0.00037**  
**cor=-0.46, p=1.1e-05**

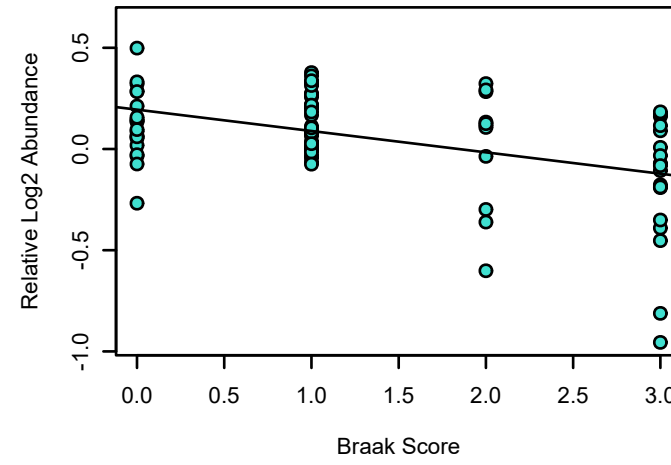

**bicor=-0.39, p=6.4e-05**  
**cor=-0.45, p=2.6e-06**

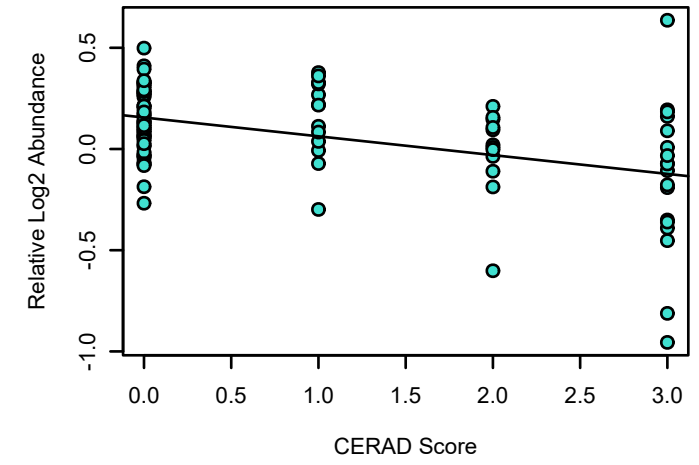

**TMPO UPenn Mixed PRM**  
**M10 purple MEGA module member**  
**K-W ANOVA p: 0.021**

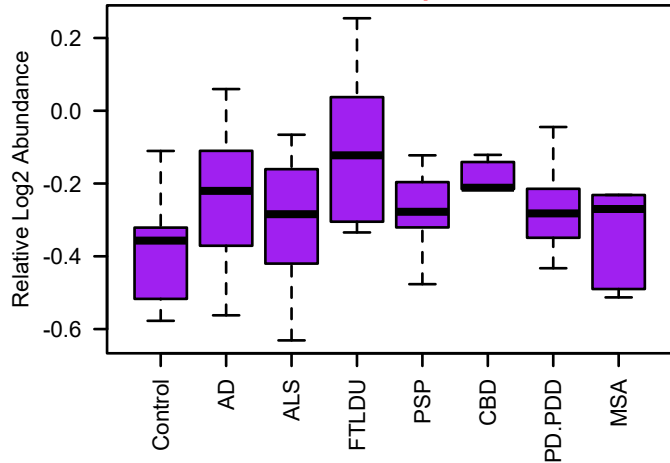

**TMPO UPenn Mixed PRM**  
**K-W ANOVA p: 0.042**

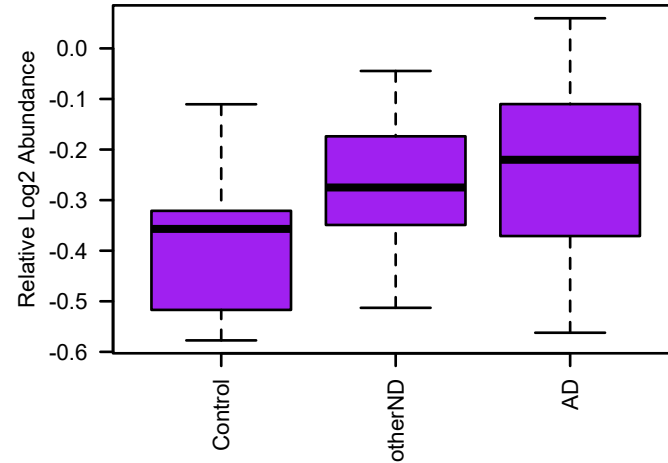

**bicor=0.21, p=0.055**  
**cor=0.25, p=0.022**

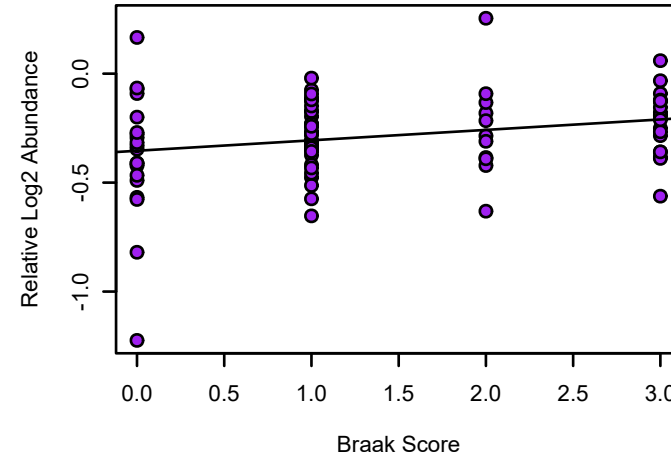

**bicor=0.11, p=0.27**  
**cor=0.14, p=0.16**

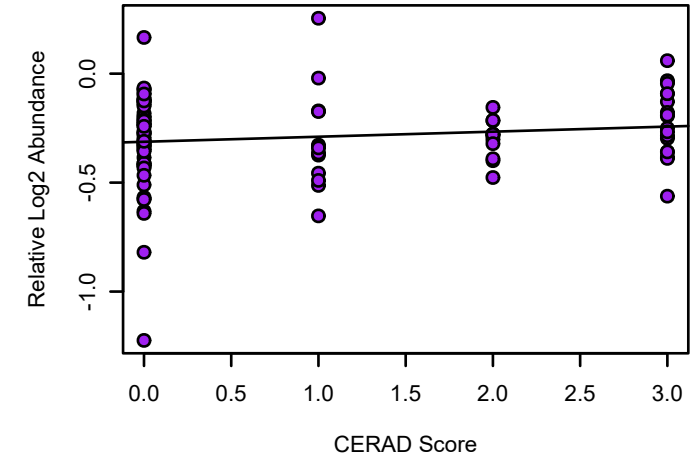

**DNM1L UPenn Mixed PRM**  
**M1 turquoise MEGA module member**  
**K-W ANOVA p: 0.39**

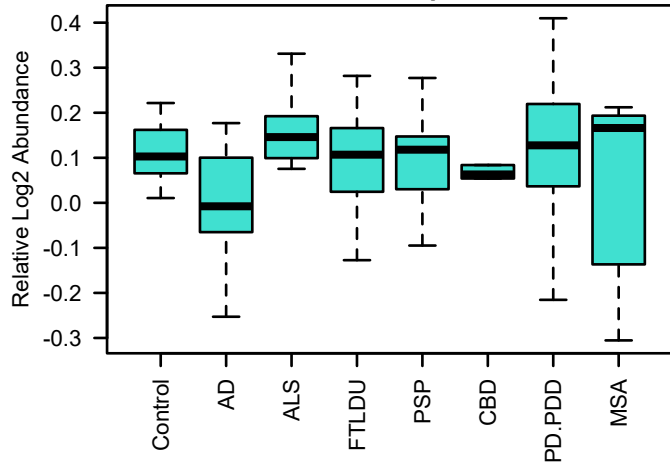

**DNM1L UPenn Mixed PRM**  
**K-W ANOVA p: 0.086**

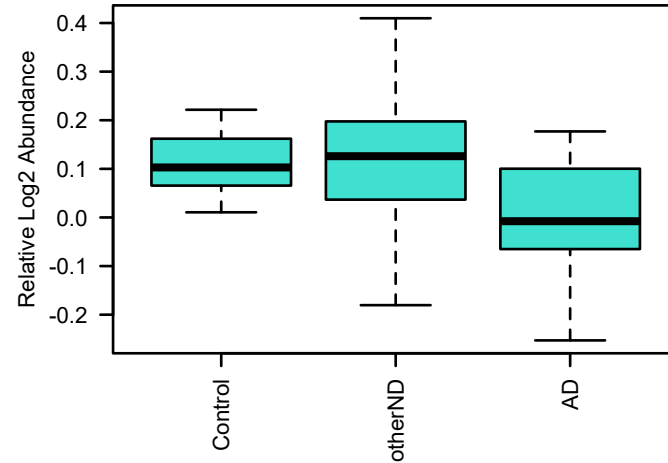

**bicor=-0.32, p=0.0029**  
**cor=-0.21, p=0.055**

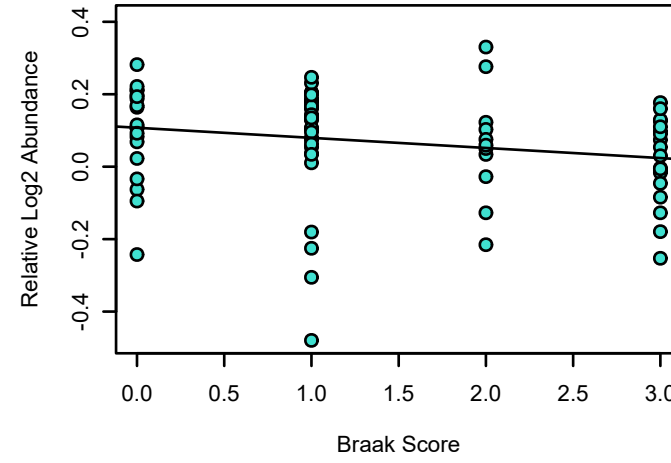

**bicor=-0.27, p=0.0074**  
**cor=-0.21, p=0.036**

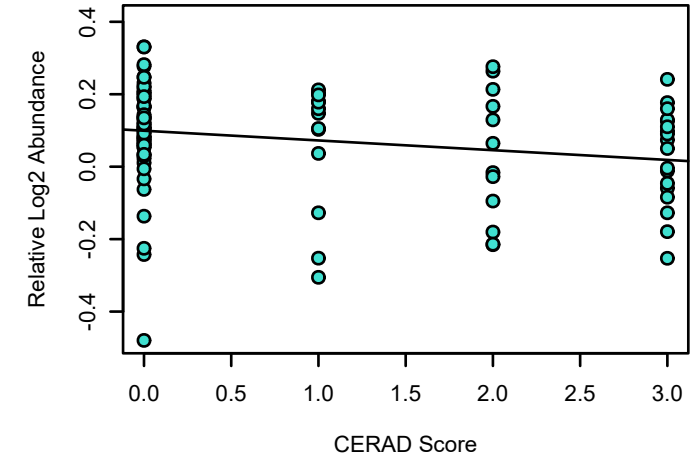

**CD44 UPenn Mixed PRM**  
**M4 yellow MEGA module member**  
**K-W ANOVA p: 1.7e-06**

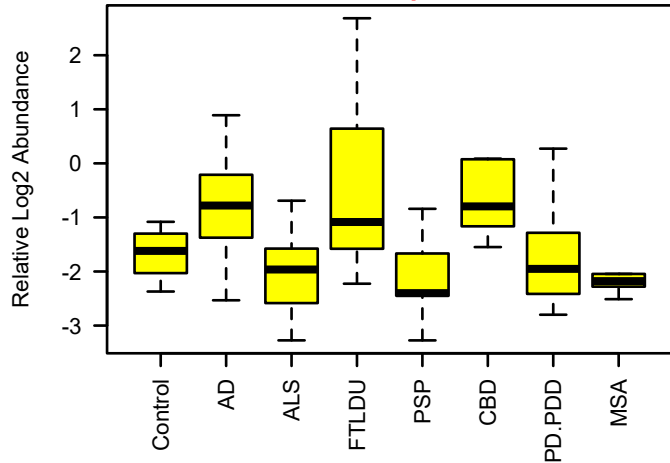

**CD44 UPenn Mixed PRM**  
**K-W ANOVA p: 0.0019**

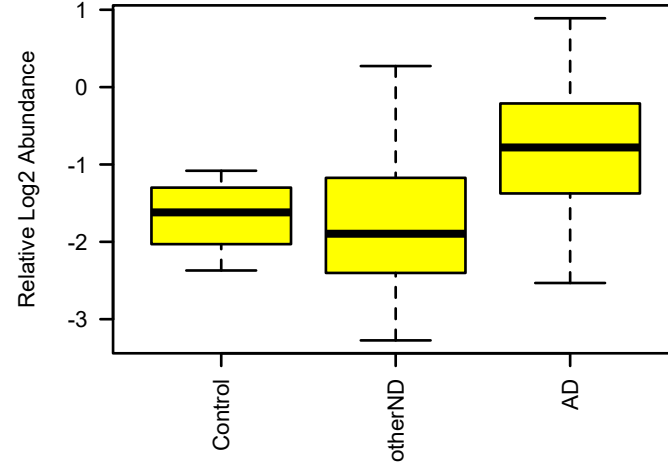

**bicor=0.4, p=0.00015**  
**cor=0.39, p=0.00025**

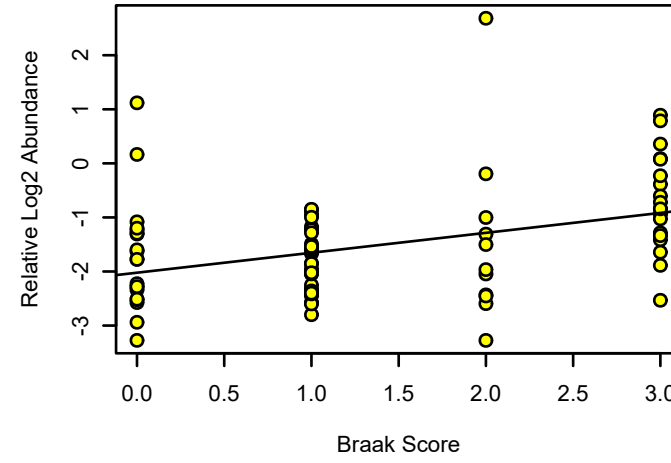

**bicor=0.34, p=6e-04**  
**cor=0.3, p=0.0024**

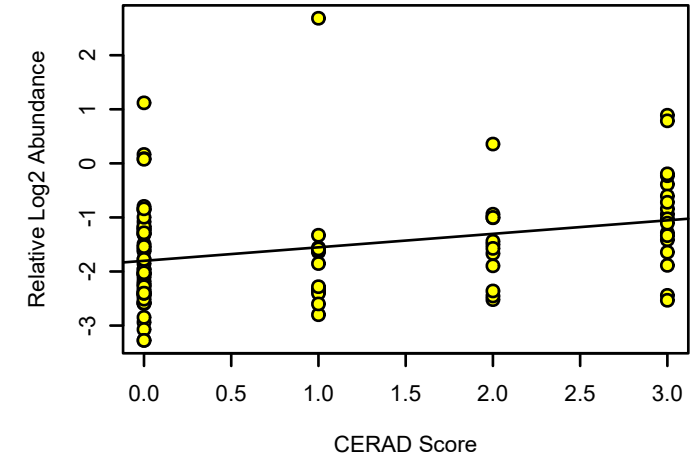



**CRIP2 UPenn Mixed PRM**  
**M6 red MEGA module member**  
**K-W ANOVA p: 0.012**

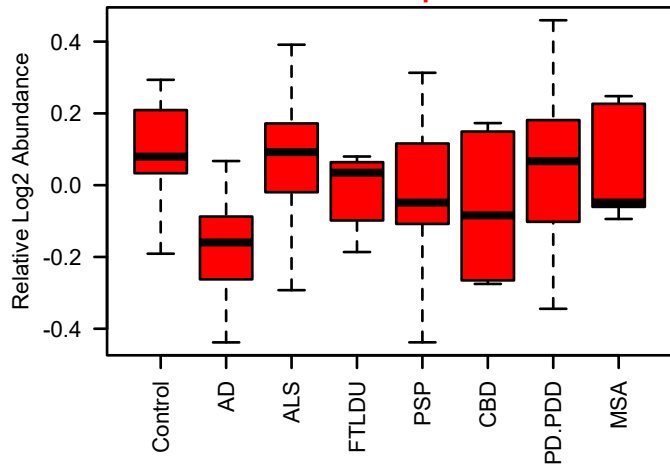

**CRIP2 UPenn Mixed PRM**  
**K-W ANOVA p: 0.00041**

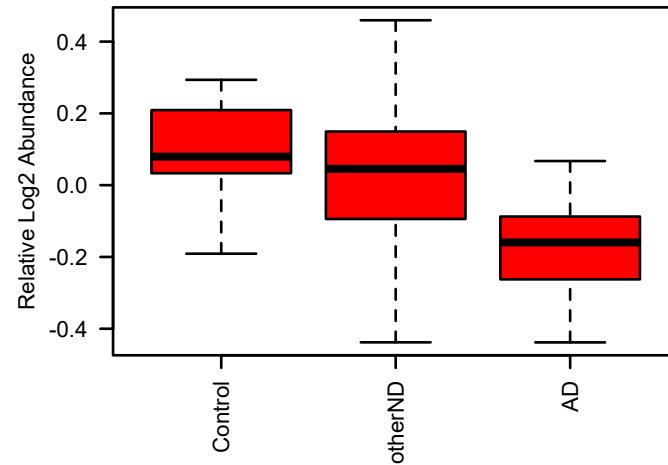

**bicor=-0.28, p=0.0094**  
**cor=-0.26, p=0.017**

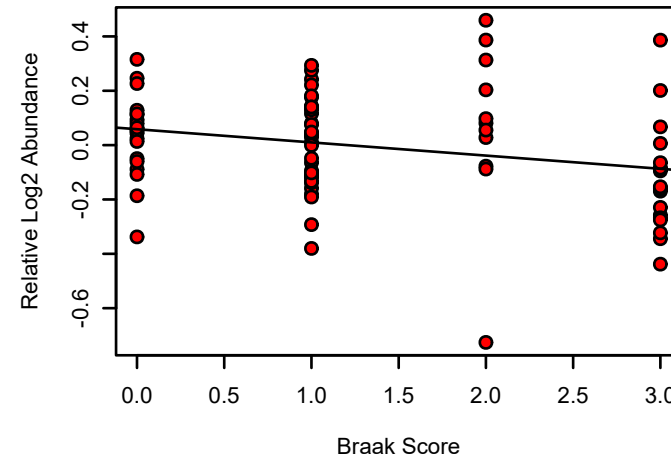

**bicor=-0.25, p=0.012**  
**cor=-0.26, p=0.009**

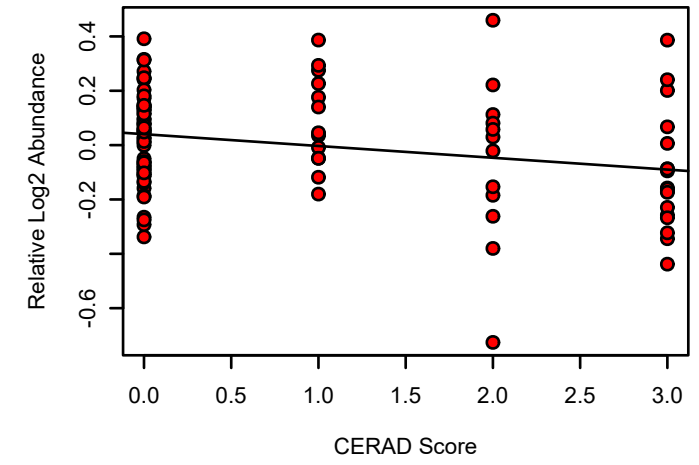

**ANKS1B UPenn Mixed PRM**  
**M1 turquoise MEGA module member**  
**K-W ANOVA p: 1.6e-05**

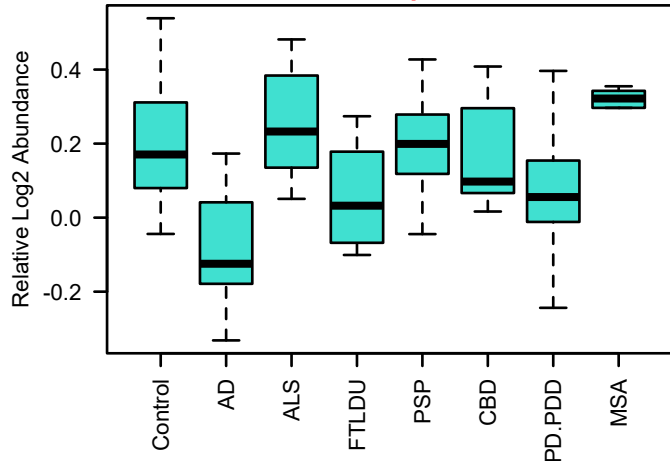

**ANKS1B UPenn Mixed PRM**  
**K-W ANOVA p: 2.1e-05**

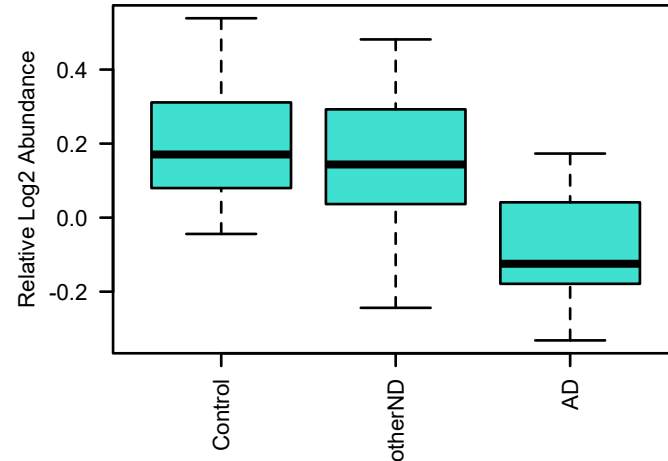

**bicor=-0.31, p=0.0041**  
**cor=-0.29, p=0.0075**

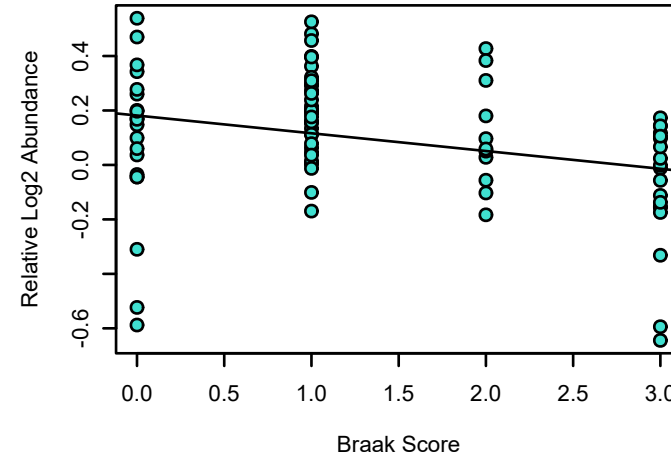

**bicor=-0.38, p=9.6e-05**  
**cor=-0.36, p=0.00023**

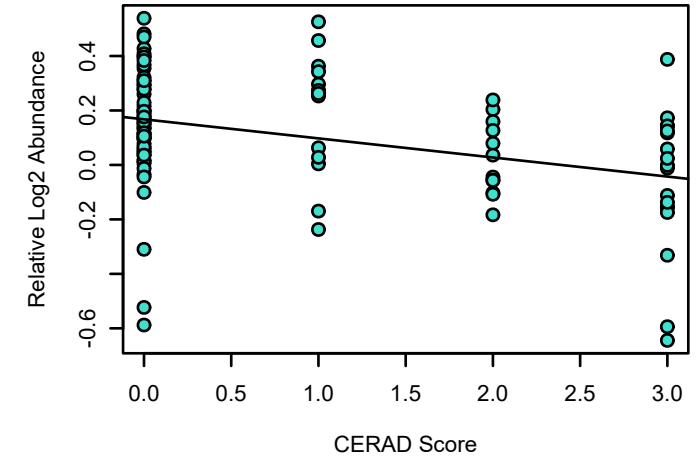

**ANP32A UPenn Mixed PRM**  
**M10 purple MEGA module member**  
**K-W ANOVA p: 3e-06**

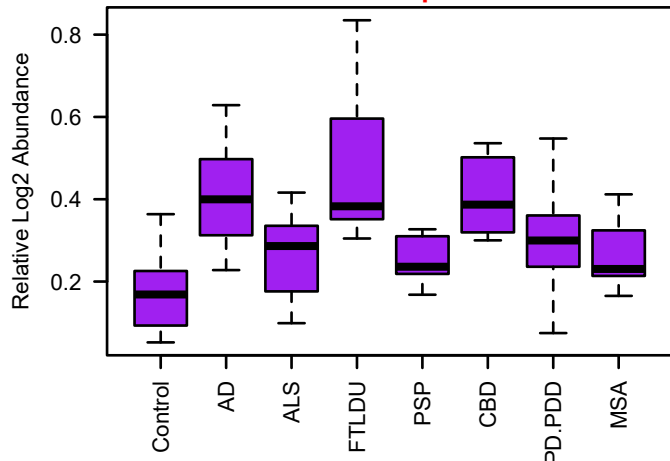

**ANP32A UPenn Mixed PRM**  
**K-W ANOVA p: 2.8e-05**

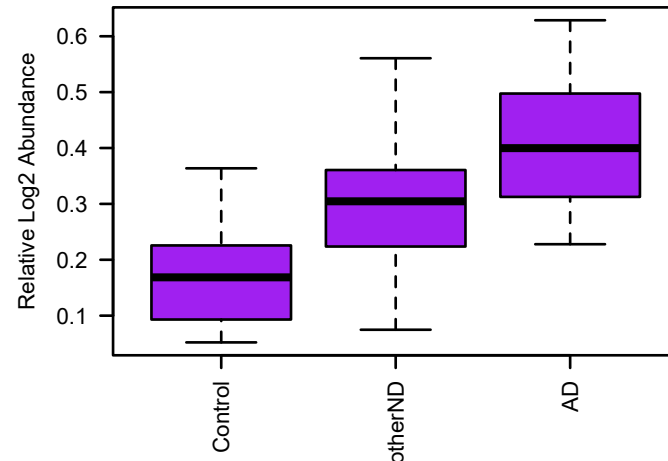

**bicor=0.43, p=4.9e-05**  
**cor=0.41, p=0.00011**

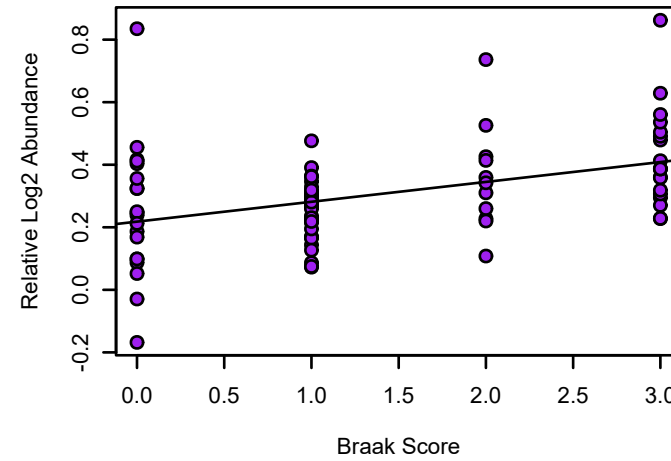

**bicor=0.23, p=0.023**  
**cor=0.22, p=0.028**

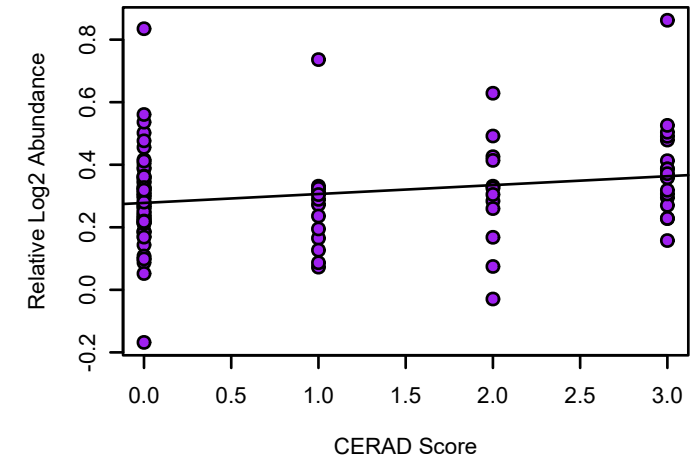

**NCAM2 UPenn Mixed PRM**  
**NA grey MEGA module member**  
**K-W ANOVA p: 0.025**

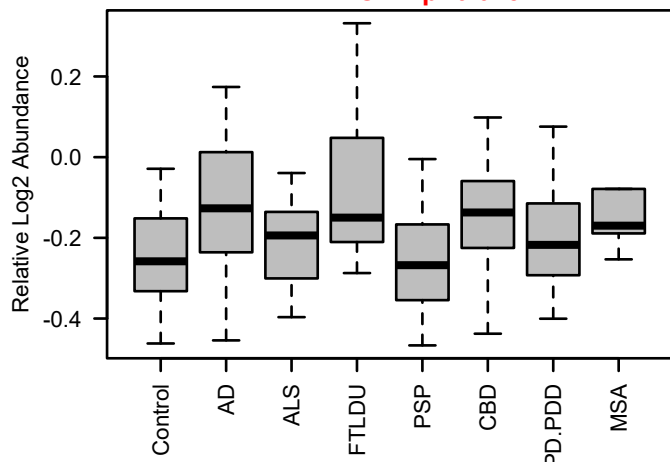

**NCAM2 UPenn Mixed PRM**  
**K-W ANOVA p: 0.066**

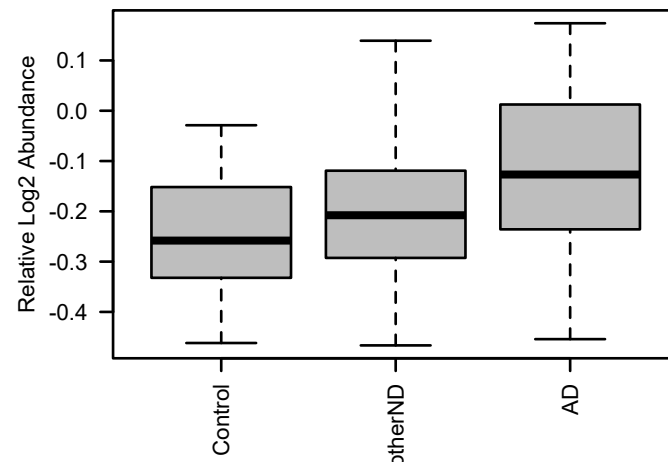

**bicor=0.25, p=0.019**  
**cor=0.24, p=0.028**

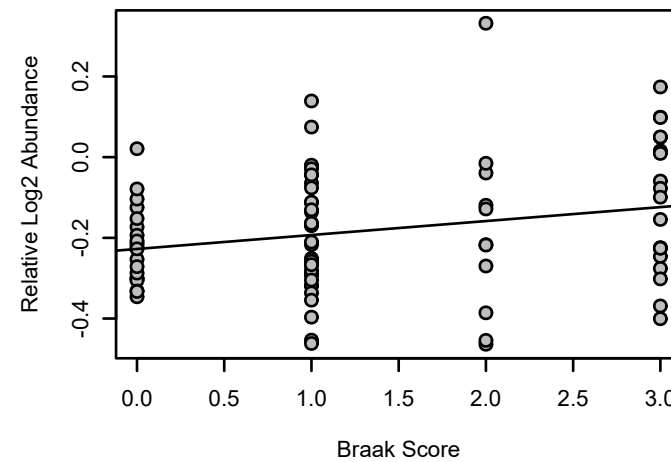

**bicor=0.21, p=0.032**  
**cor=0.22, p=0.028**

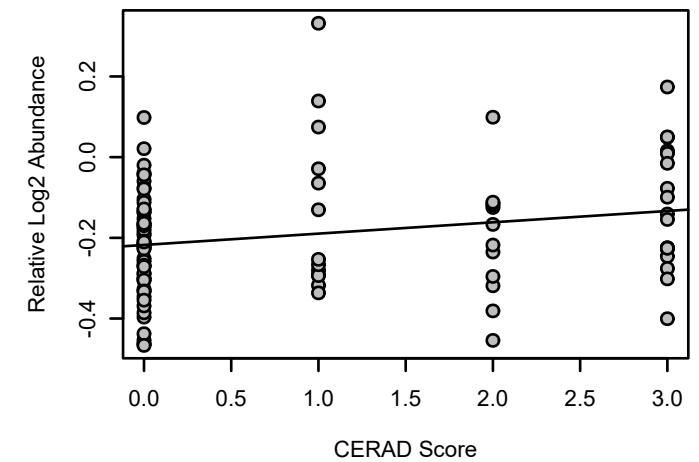

**ACTN1 UPenn Mixed PRM**  
M1 turquoise MEGA module member  
K-W ANOVA p: 5.8e-07

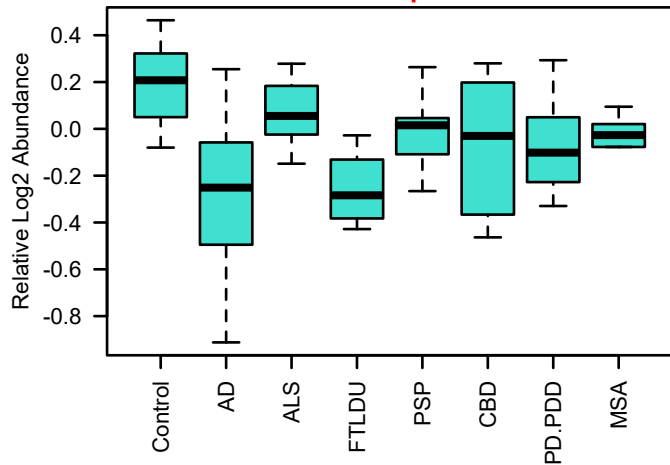

**ACTN1 UPenn Mixed PRM**  
K-W ANOVA p: 2.7e-06

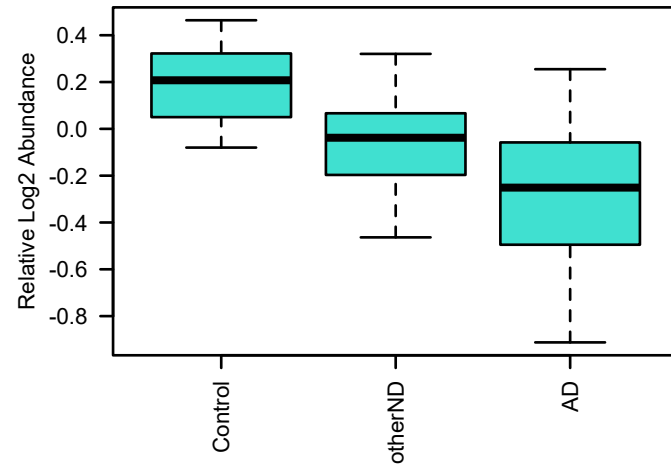

**bicor=-0.36, p=0.00076**  
**cor=-0.4, p=0.00016**

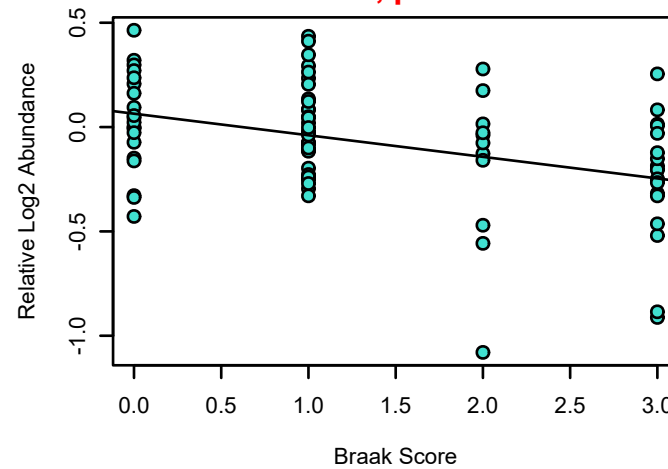

**bicor=-0.34, p=0.00055**  
**cor=-0.35, p=0.00036**

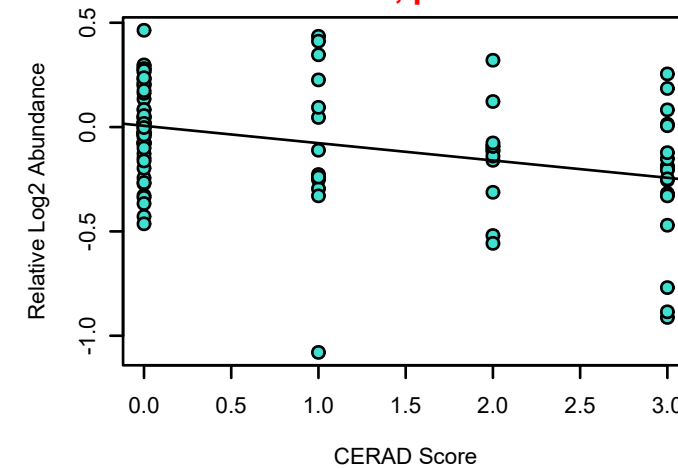

**SYT1 UPenn Mixed PRM**  
M1 turquoise MEGA module member  
K-W ANOVA p: 0.011

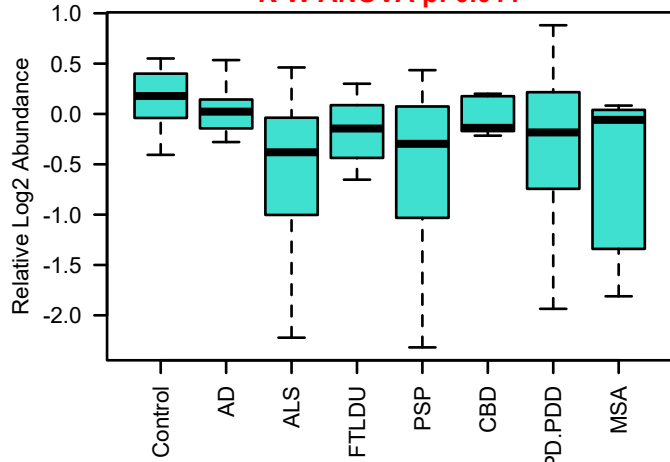

**SYT1 UPenn Mixed PRM**  
K-W ANOVA p: 0.00094

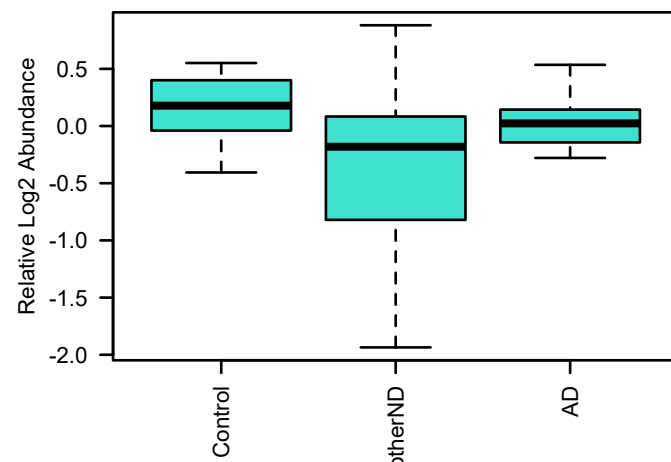

**bicor=-0.095, p=0.39**  
**cor=0.013, p=0.91**

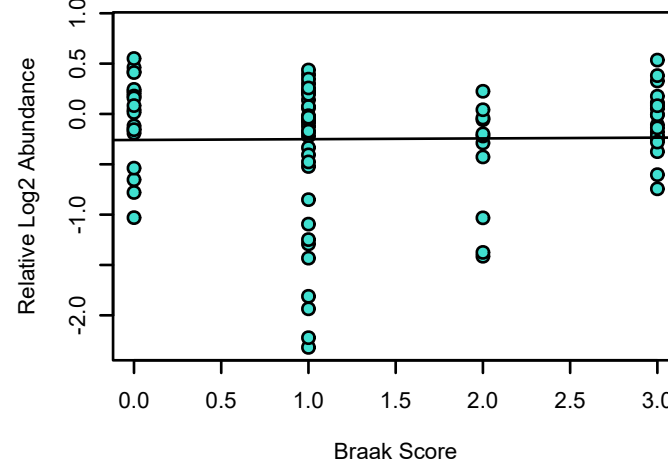

**bicor=0.1, p=0.32**  
**cor=0.1, p=0.32**

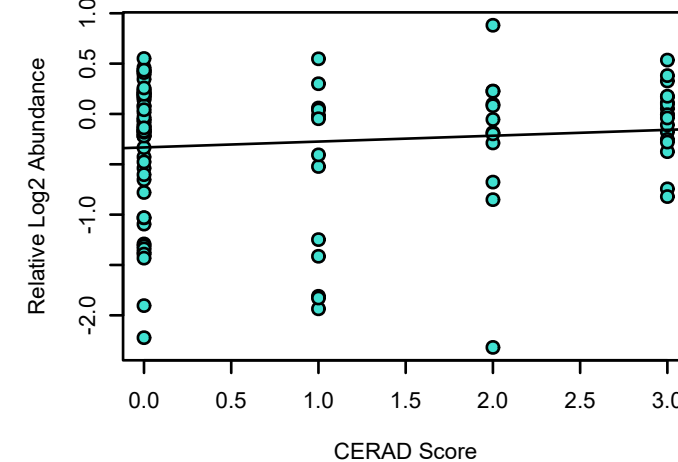

**SRSF2 UPenn Mixed PRM**  
M10 purple MEGA module member  
K-W ANOVA p: 0.057

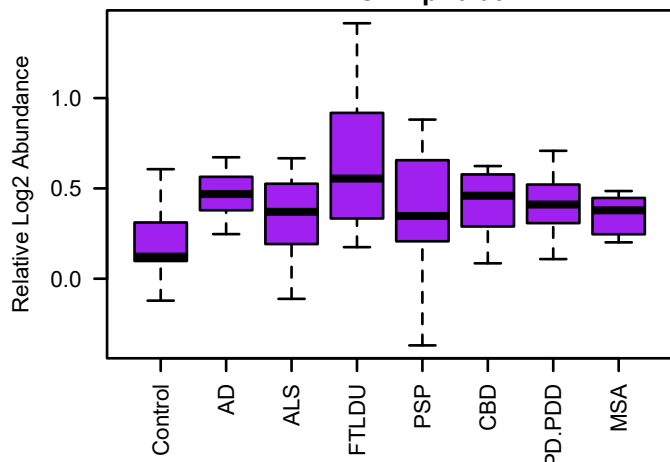

**SRSF2 UPenn Mixed PRM**  
K-W ANOVA p: 0.063

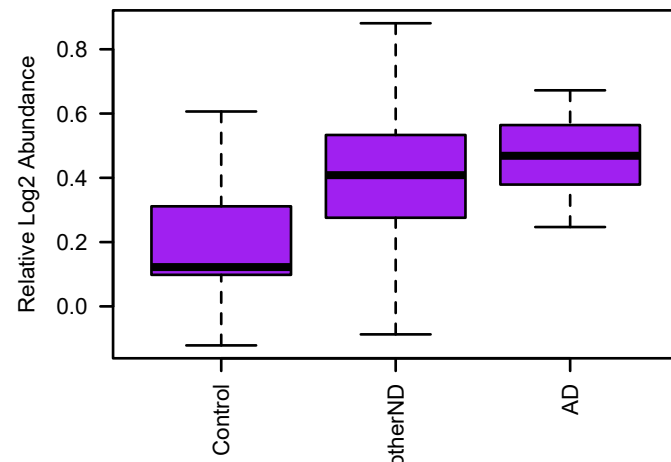

**bicor=0.27, p=0.012**  
**cor=0.057, p=0.61**

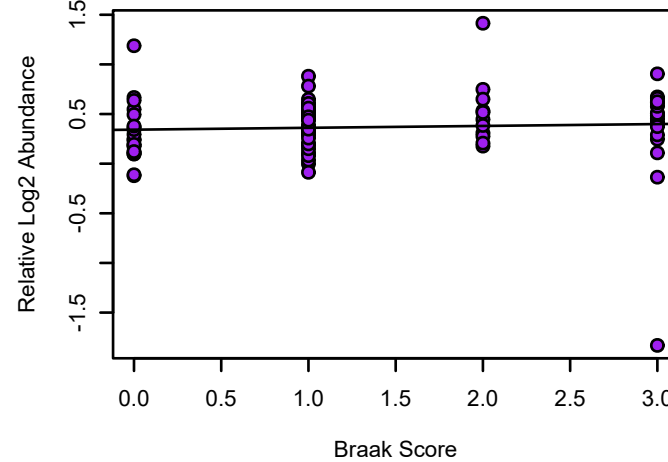

**bicor=0.19, p=0.056**  
**cor=0.17, p=0.091**

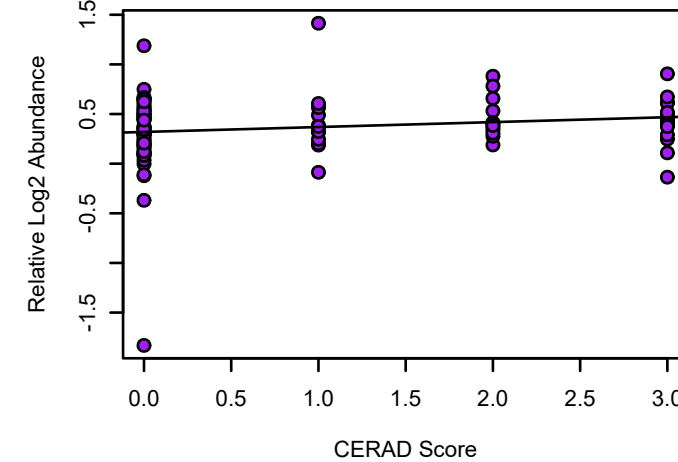

**LONP1 UPenn Mixed PRM**  
M3 brown MEGA module member  
K-W ANOVA p: 0.37

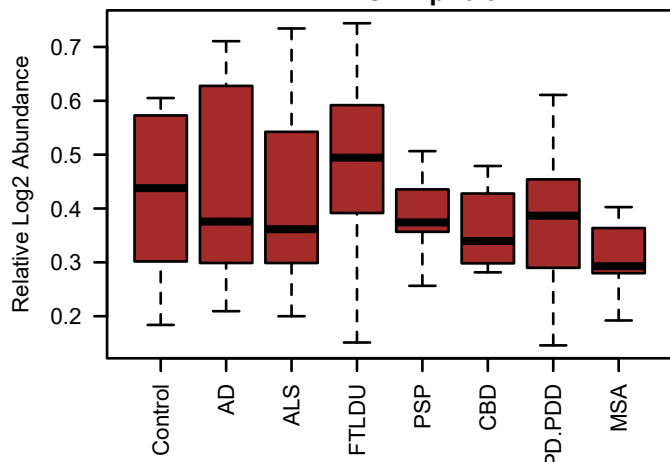

**LONP1 UPenn Mixed PRM**  
K-W ANOVA p: 0.38

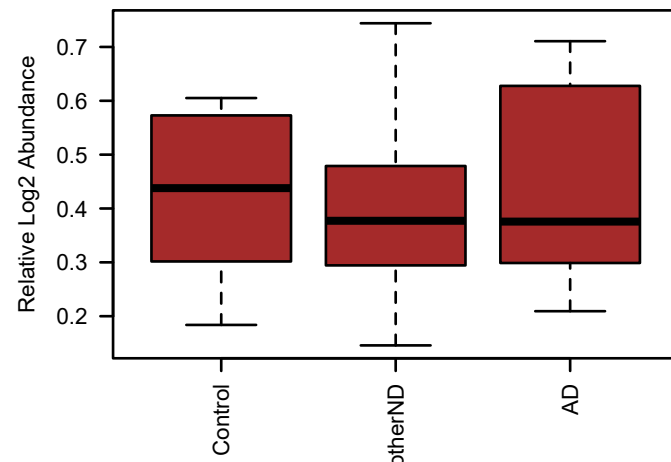

**bicor=0.018, p=0.87**  
**cor=0.026, p=0.81**

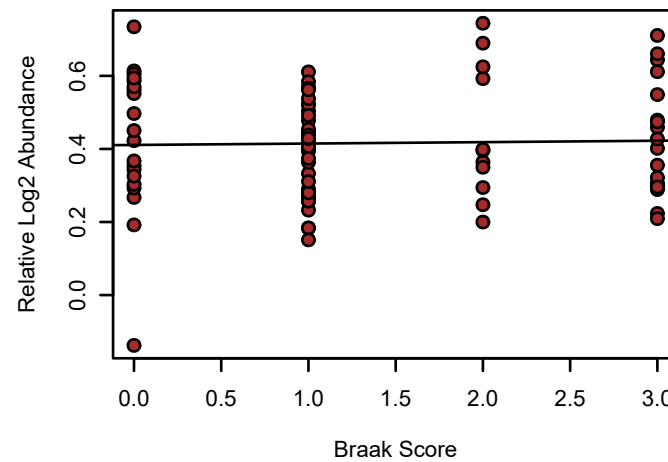

**bicor=-0.071, p=0.48**  
**cor=-0.069, p=0.5**

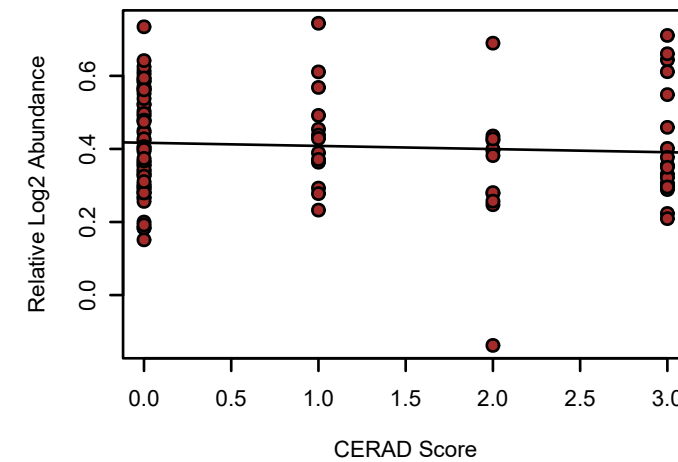

**RPS5 UPenn Mixed PRM**  
**M12 tan MEGA module member**  
**K-W ANOVA p: 0.0019**

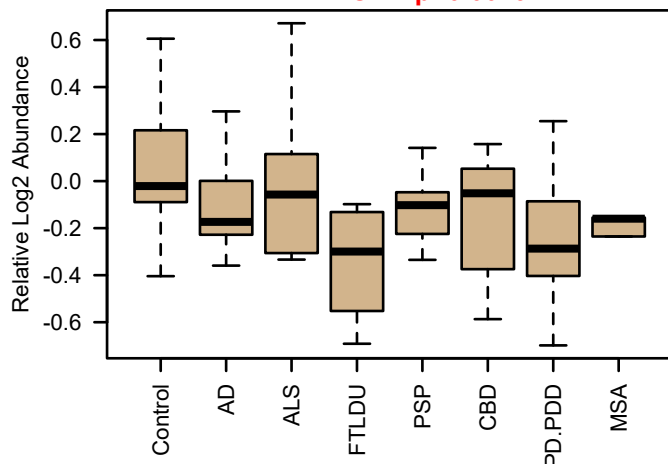

**RPS5 UPenn Mixed PRM**  
**K-W ANOVA p: 0.0019**

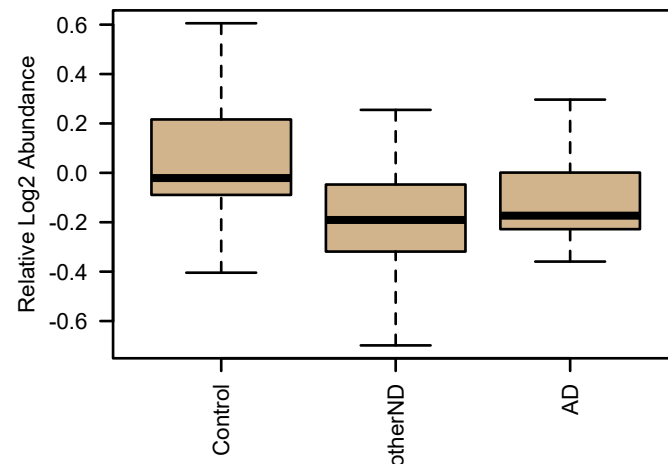

**bicor=0.0041, p=0.97**  
**cor=0.0071, p=0.95**

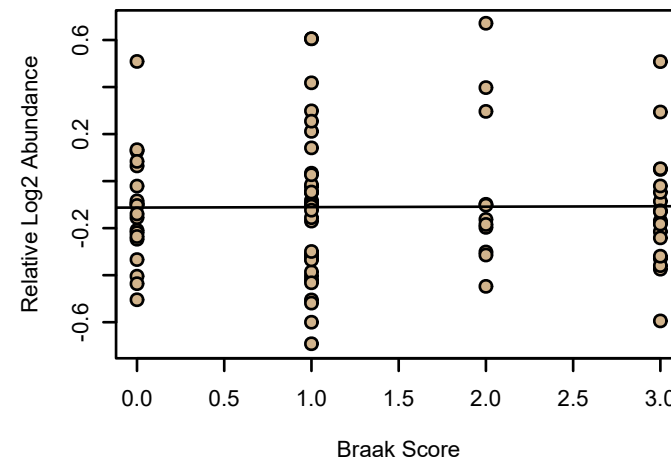

**bicor=-0.055, p=0.59**  
**cor=-0.059, p=0.56**

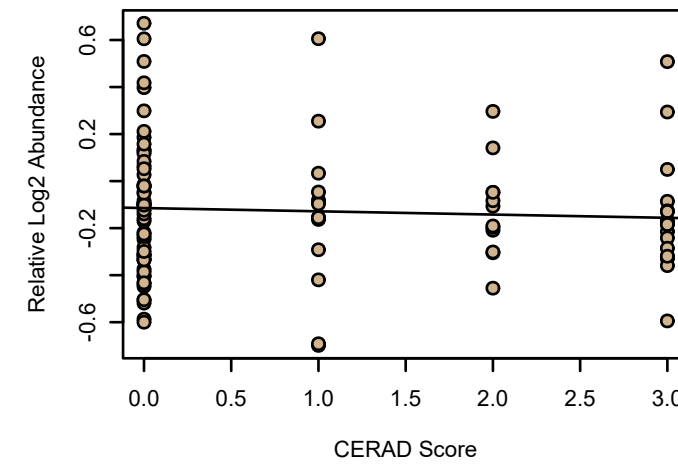

**PAFAH1B3 UPenn Mixed PRM**  
**M4 yellow MEGA module member**  
**K-W ANOVA p: 1.2e-08**

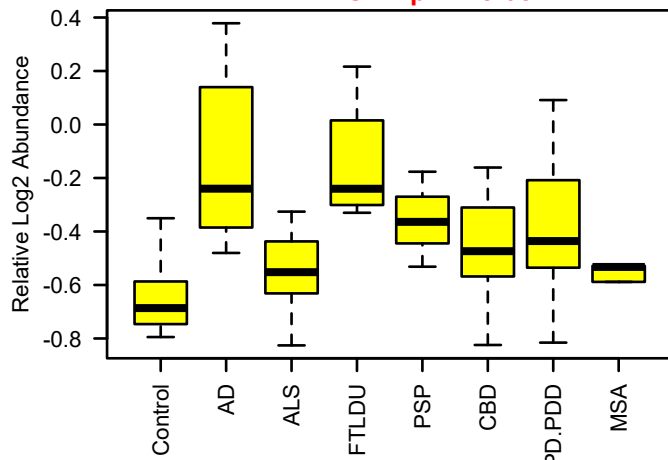

**PAFAH1B3 UPenn Mixed PRM**  
**K-W ANOVA p: 8.8e-07**

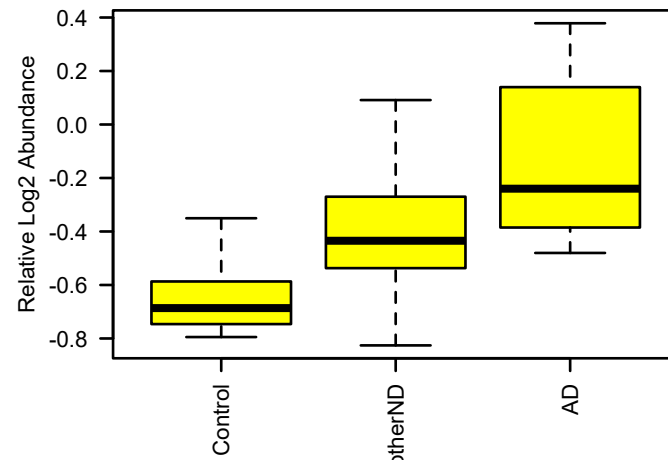

**bicor=0.46, p=8.6e-06**  
**cor=0.45, p=1.7e-05**

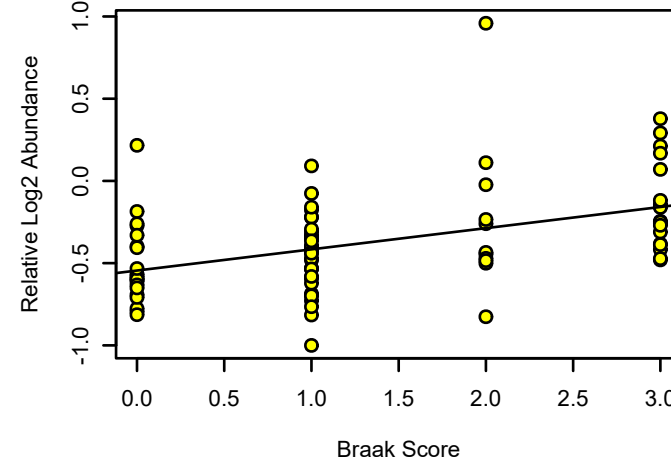

**bicor=0.43, p=8.6e-06**  
**cor=0.39, p=6e-05**

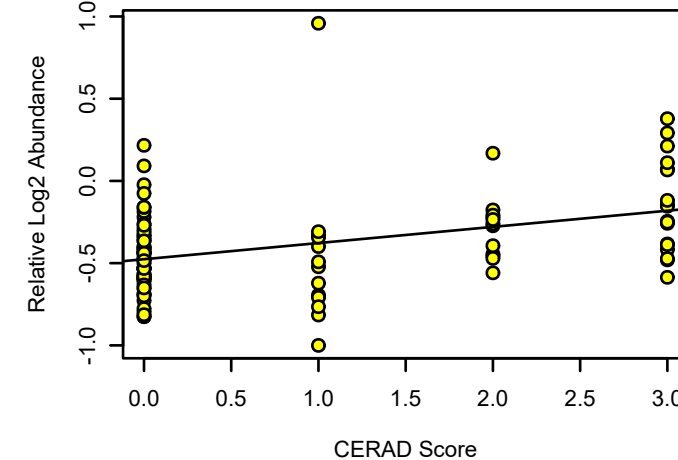

**RPL18A UPenn Mixed PRM**  
**M7 black MEGA module member**  
**K-W ANOVA p: 0.0015**

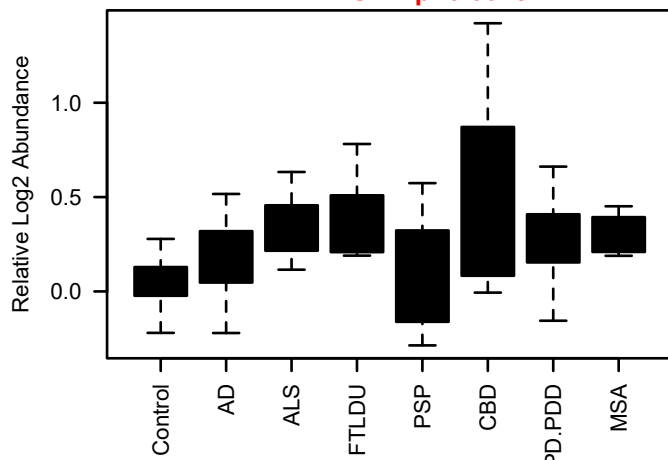

**RPL18A UPenn Mixed PRM**  
**K-W ANOVA p: 0.15**

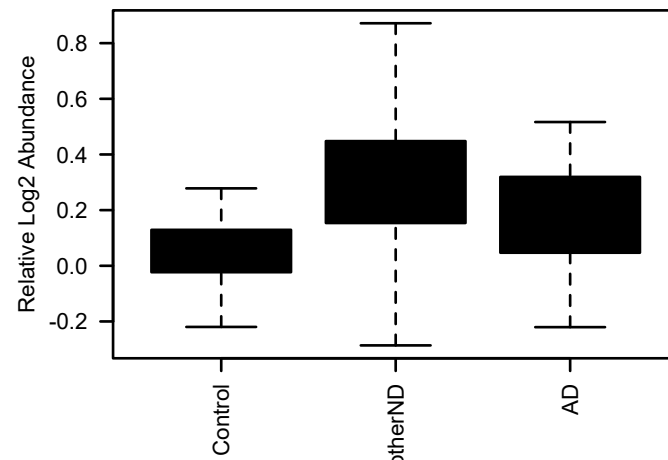

**bicor=0.016, p=0.89**  
**cor=0.031, p=0.78**

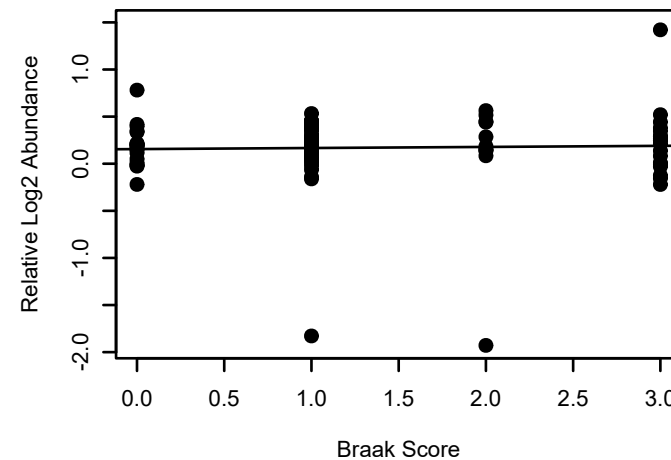

**bicor=0.033, p=0.74**  
**cor=-0.024, p=0.81**

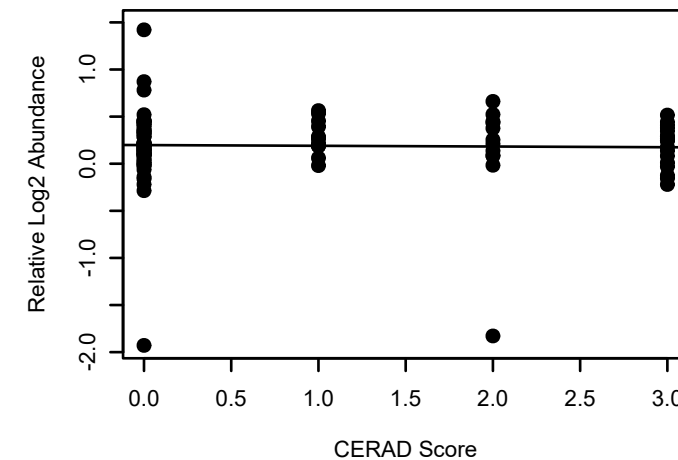

**RAB27B UPenn Mixed PRM**  
**NA grey MEGA module member**  
**K-W ANOVA p: 0.011**

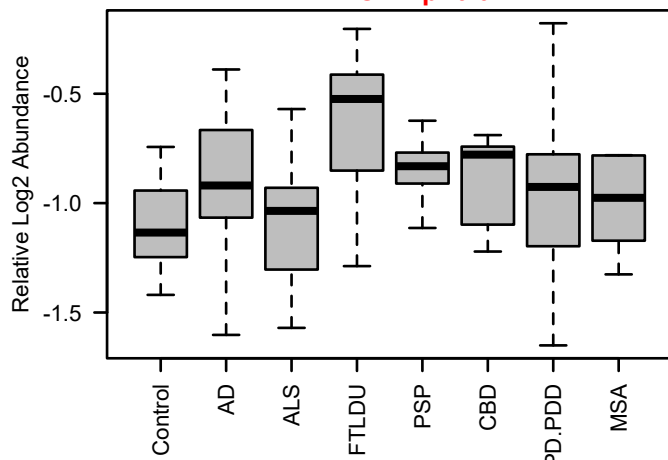

**RAB27B UPenn Mixed PRM**  
**K-W ANOVA p: 0.16**

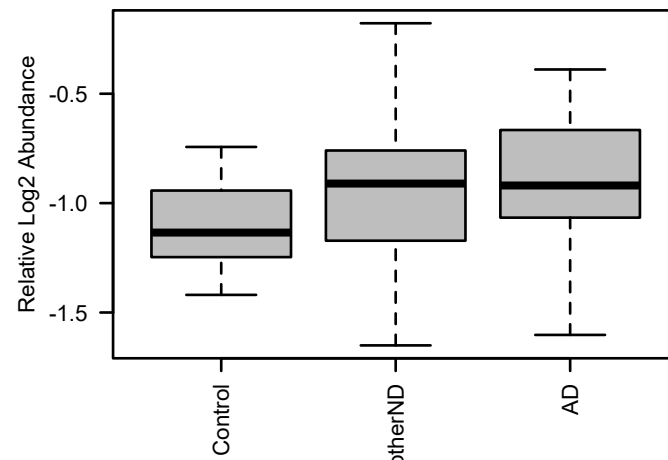

**bicor=0.1, p=0.37**  
**cor=0.1, p=0.37**

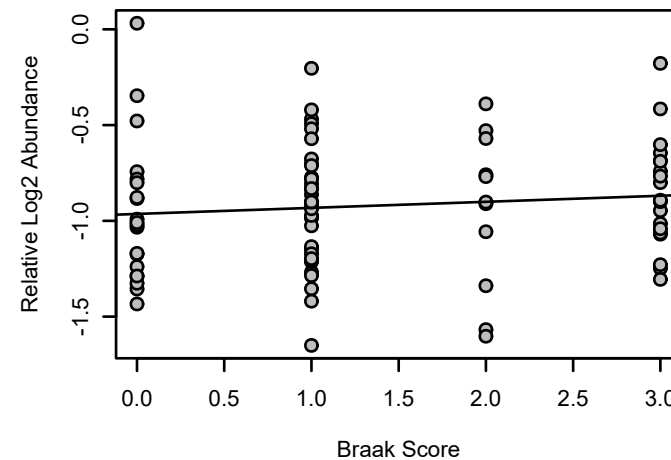

**bicor=0.16, p=0.11**  
**cor=0.17, p=0.091**

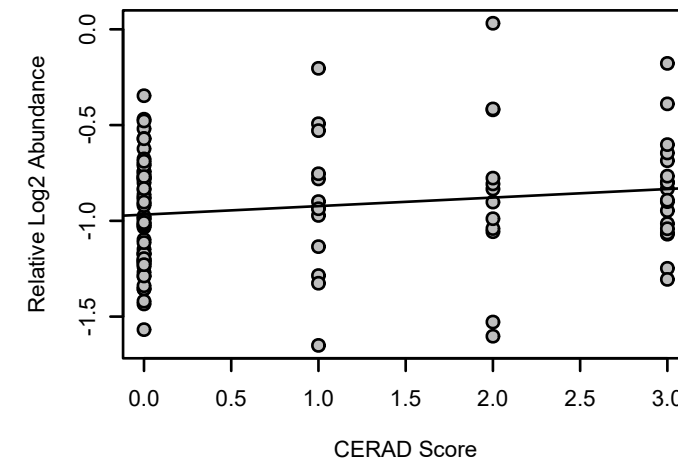

**PDHX UPenn Mixed PRM**  
M3 brown MEGA module member  
K-W ANOVA p: 0.41

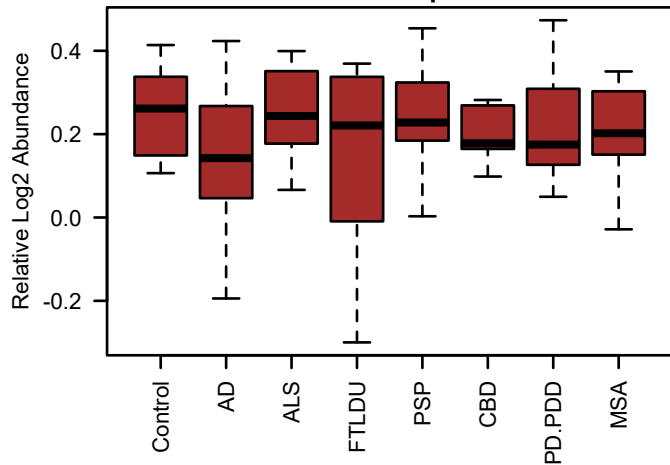

**PDHX UPenn Mixed PRM**  
K-W ANOVA p: 0.15

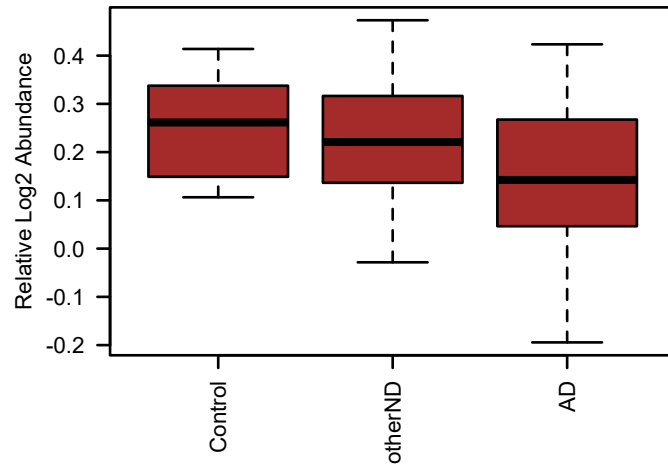

**bicor=-0.17, p=0.11**  
**cor=-0.17, p=0.12**

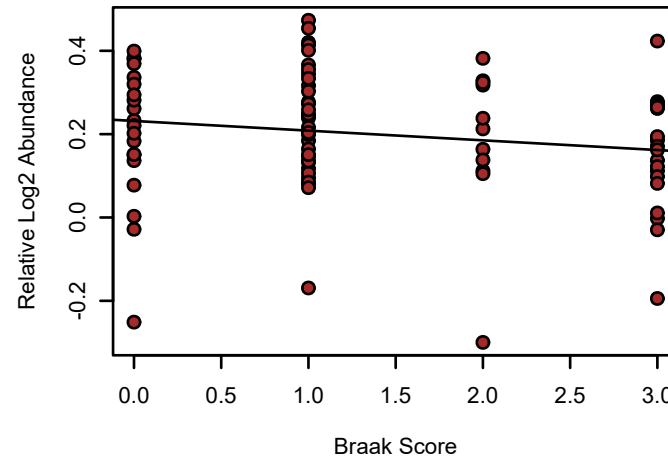

**bicor=-0.24, p=0.015**  
**cor=-0.2, p=0.046**

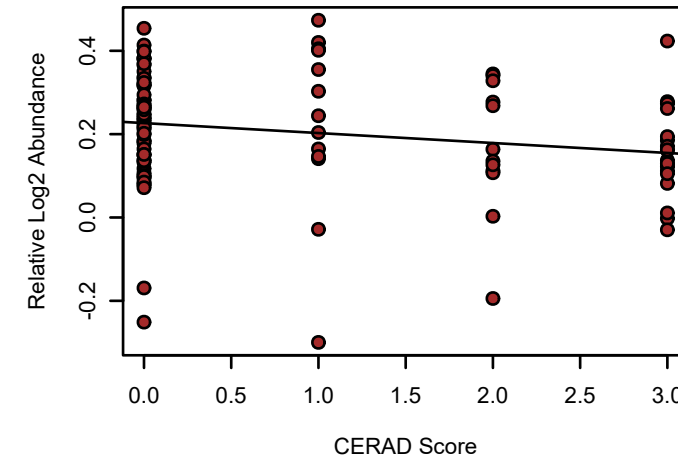

**IPO5 UPenn Mixed PRM**  
M12 tan MEGA module member  
K-W ANOVA p: 0.24

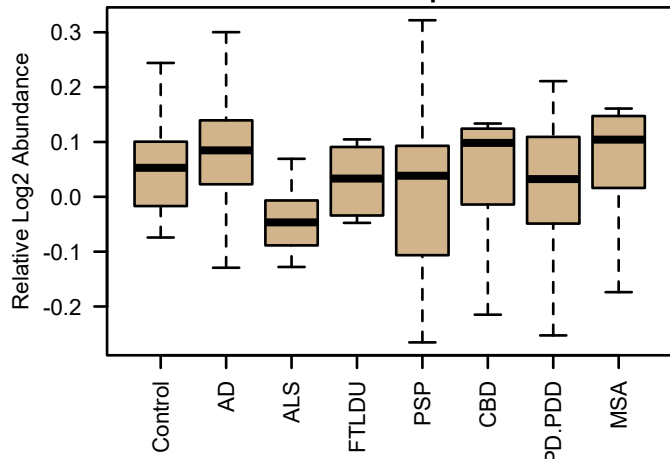

**IPO5 UPenn Mixed PRM**  
K-W ANOVA p: 0.083

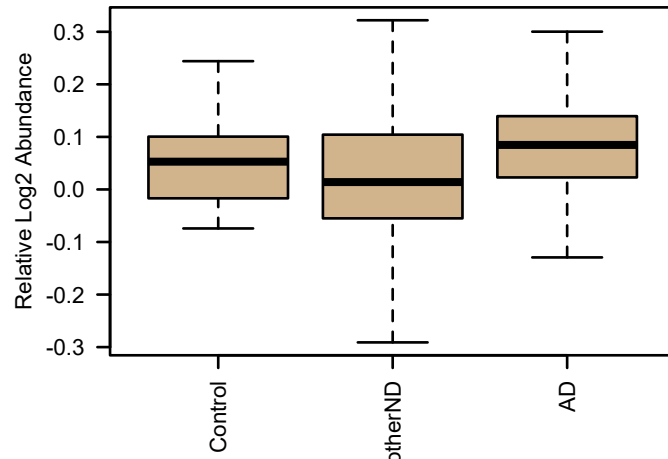

**bicor=0.22, p=0.044**  
**cor=0.29, p=0.0075**

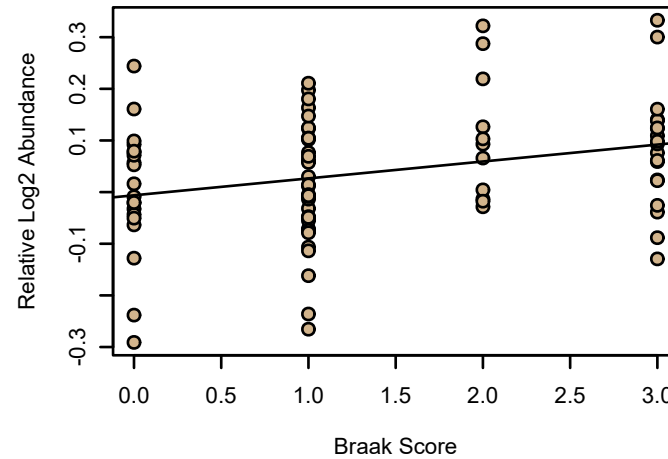

**bicor=0.12, p=0.22**  
**cor=0.13, p=0.2**

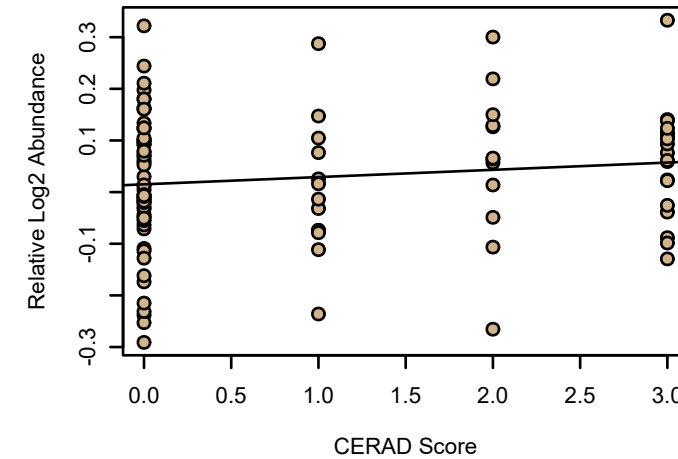

**AP3D1 UPenn Mixed PRM**  
M1 turquoise MEGA module member  
K-W ANOVA p: 0.0092

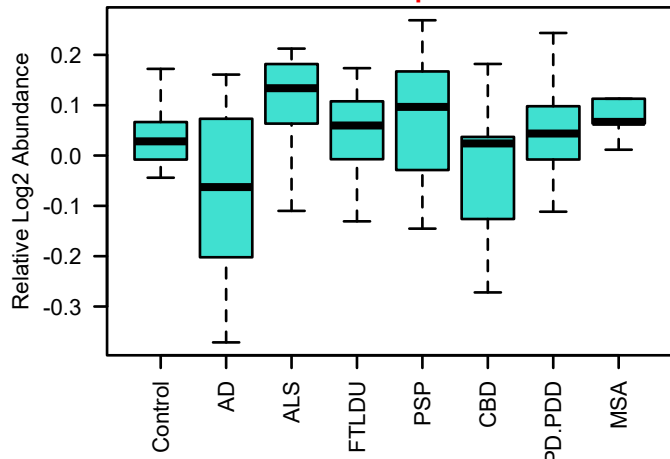

**AP3D1 UPenn Mixed PRM**  
K-W ANOVA p: 0.0018

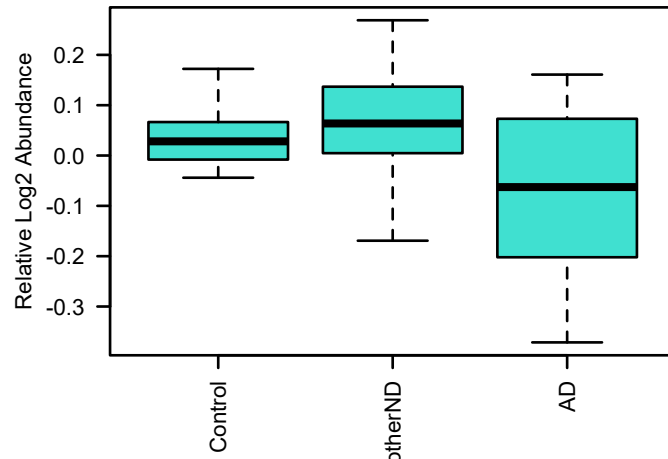

**bicor=-0.26, p=0.019**  
**cor=-0.31, p=0.0041**

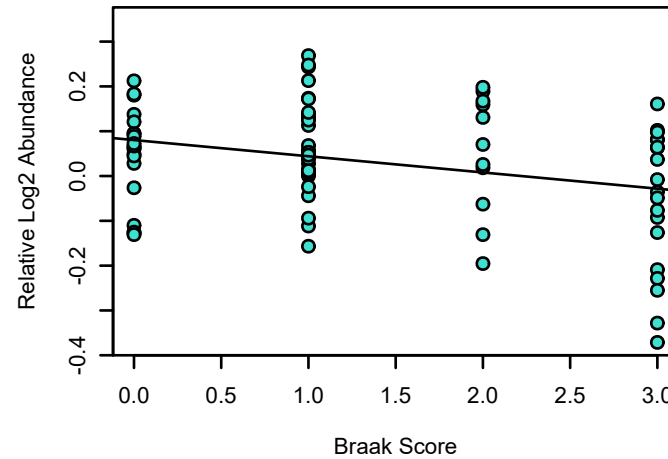

**bicor=-0.21, p=0.036**  
**cor=-0.21, p=0.036**

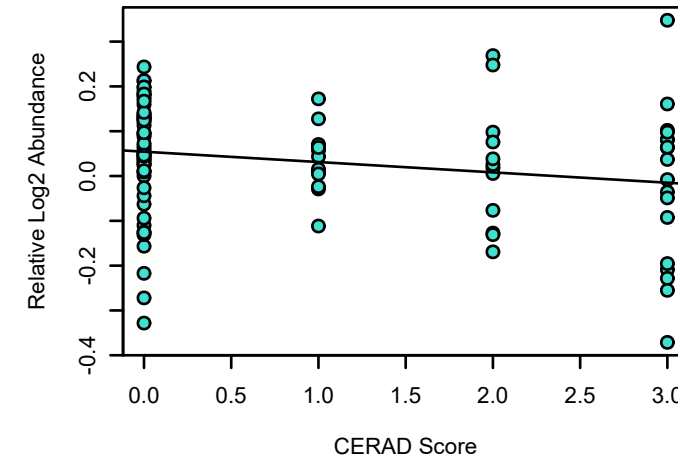

**GNB5 UPenn Mixed PRM**  
M1 turquoise MEGA module member  
K-W ANOVA p: 2.4e-06

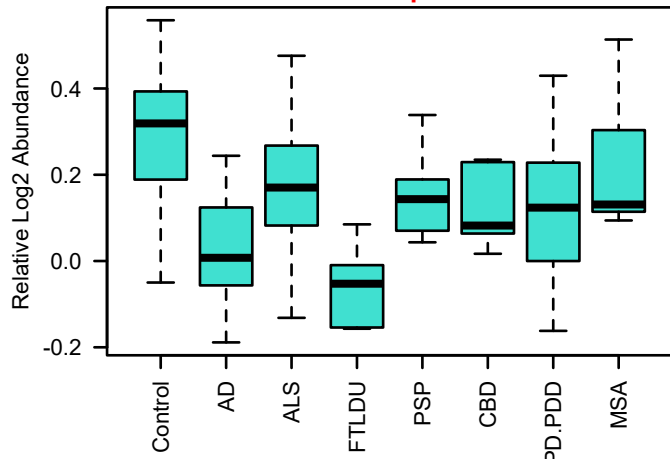

**GNB5 UPenn Mixed PRM**  
K-W ANOVA p: 5.5e-05

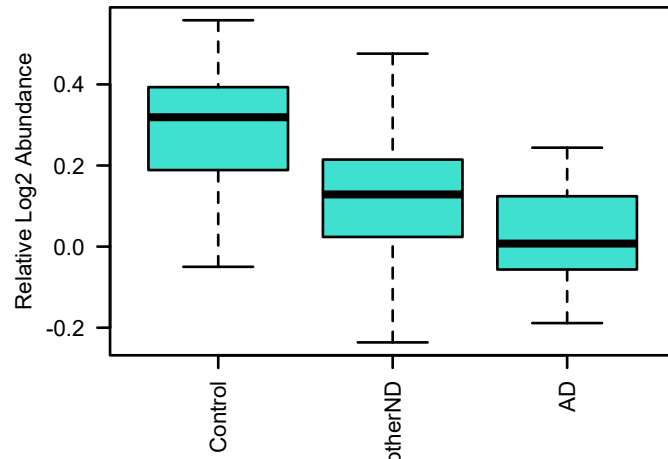

**bicor=-0.32, p=0.0032**  
**cor=-0.31, p=0.0041**

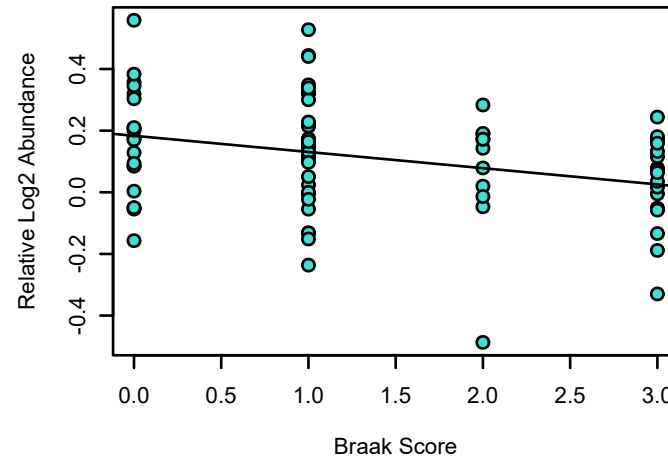

**bicor=-0.3, p=0.0028**  
**cor=-0.29, p=0.0034**

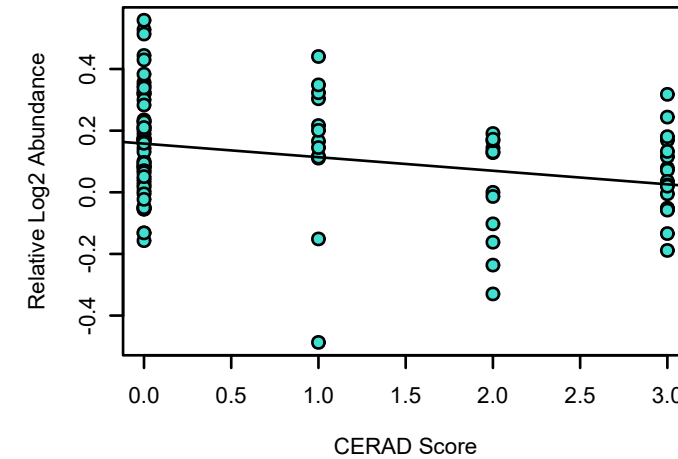

**MGST3 UPenn Mixed PRM**  
M12 tan MEGA module member  
K-W ANOVA p: 3.3e-05

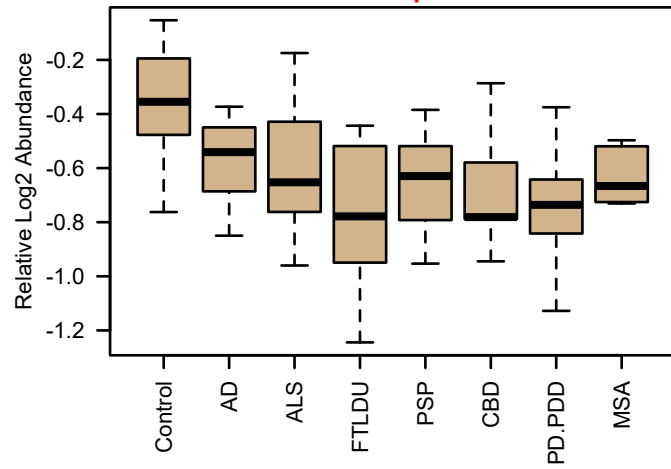

**MGST3 UPenn Mixed PRM**  
K-W ANOVA p: 1.2e-06

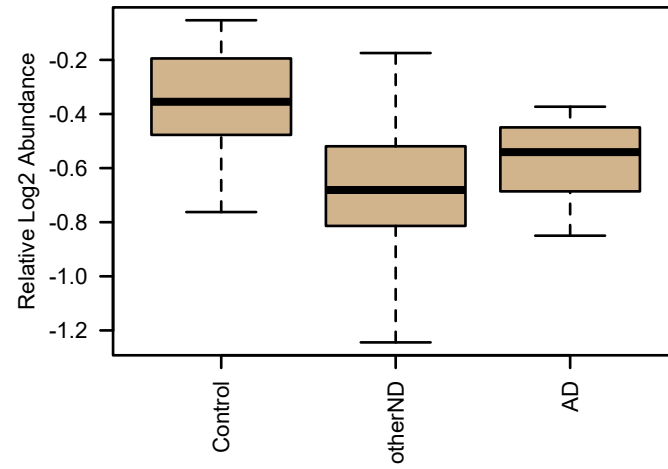

**bicor=-0.12, p=0.26**  
**cor=-0.13, p=0.24**

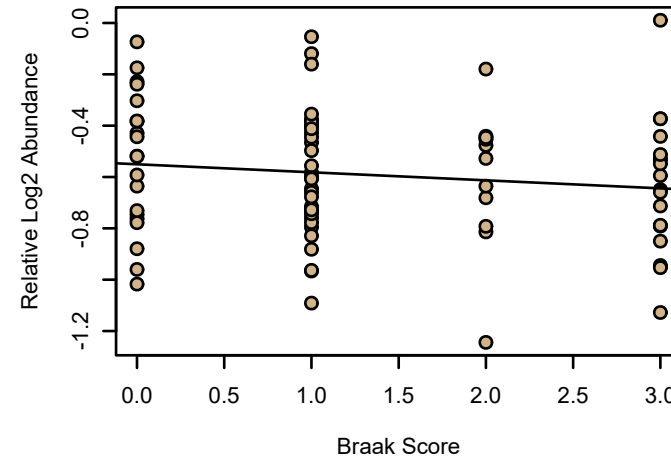

**bicor=-0.023, p=0.82**  
**cor=-0.026, p=0.8**

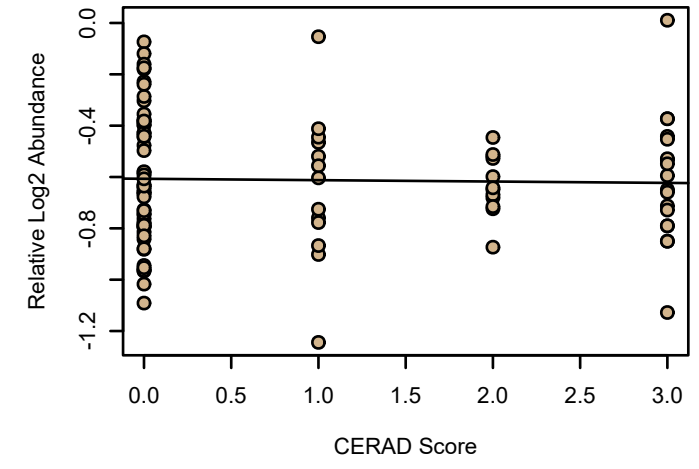

**LIN7A UPenn Mixed PRM**  
M1 turquoise MEGA module member  
K-W ANOVA p: 0.24

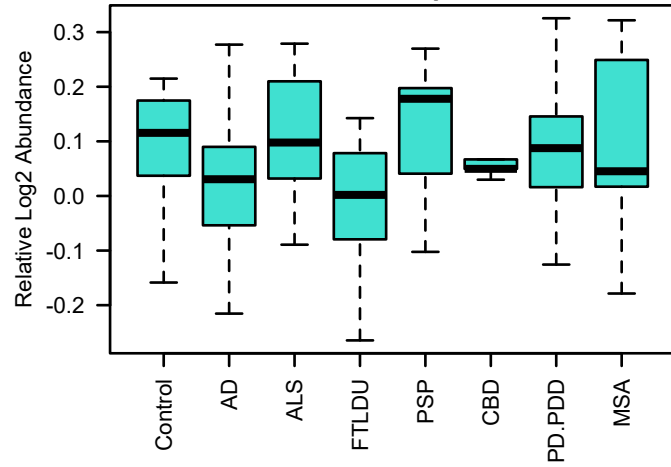

**LIN7A UPenn Mixed PRM**  
K-W ANOVA p: 0.2

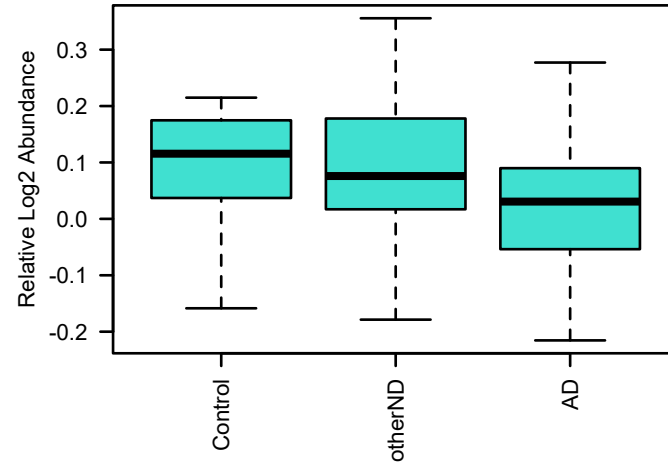

**bicor=-0.069, p=0.53**  
**cor=-0.082, p=0.46**

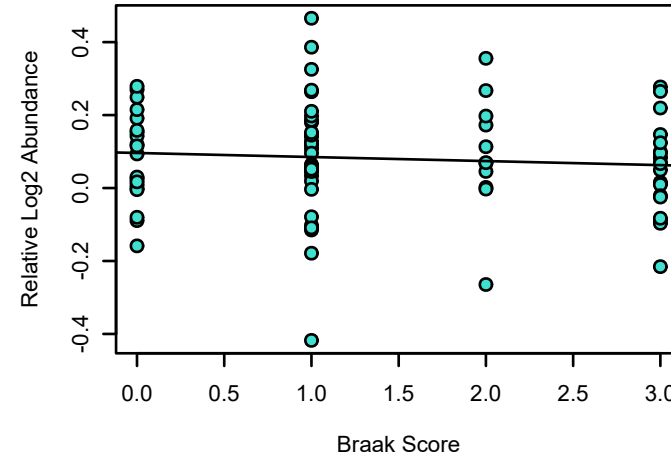

**bicor=-0.097, p=0.34**  
**cor=-0.074, p=0.46**

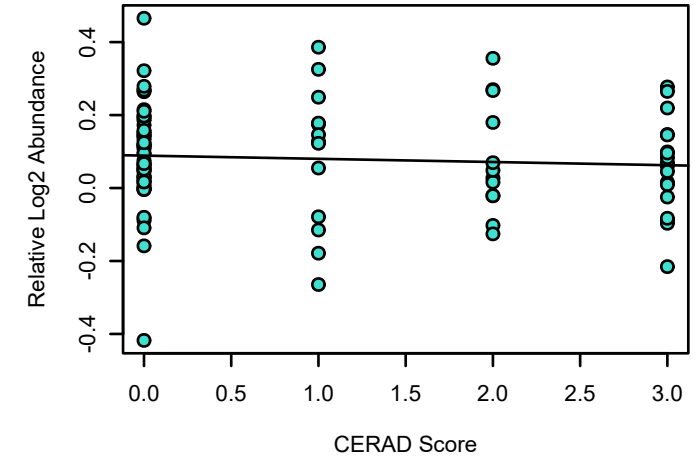

**SPTBN2 UPenn Mixed PRM**  
M1 turquoise MEGA module member  
K-W ANOVA p: 0.26

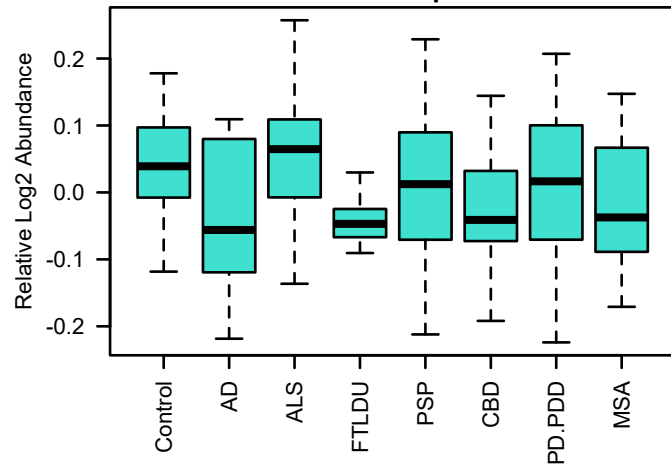

**SPTBN2 UPenn Mixed PRM**  
K-W ANOVA p: 0.15

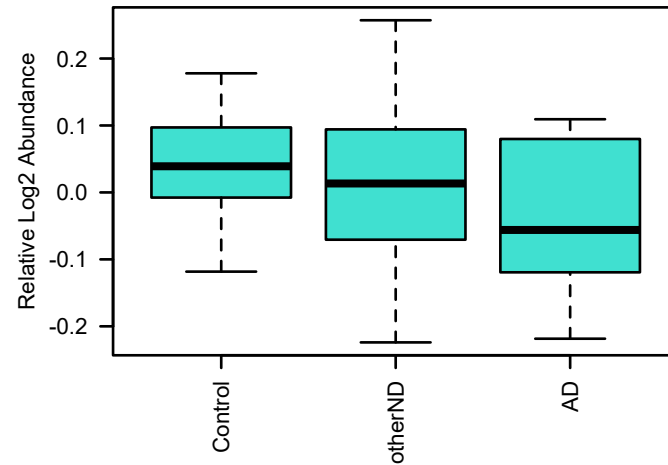

**bicor=-0.16, p=0.16**  
**cor=-0.18, p=0.1**

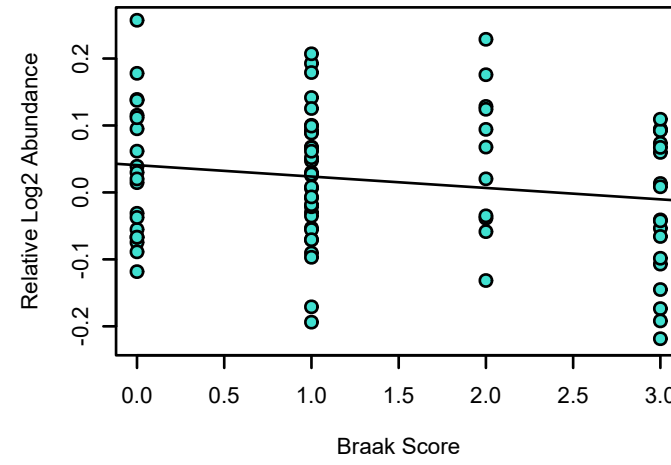

**bicor=-0.18, p=0.068**  
**cor=-0.19, p=0.058**

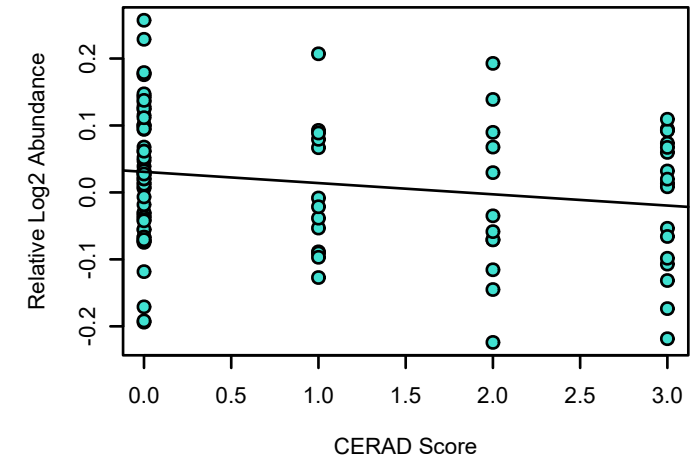

**DCLK1 UPenn Mixed PRM**  
M1 turquoise MEGA module member  
K-W ANOVA p: 0.0017

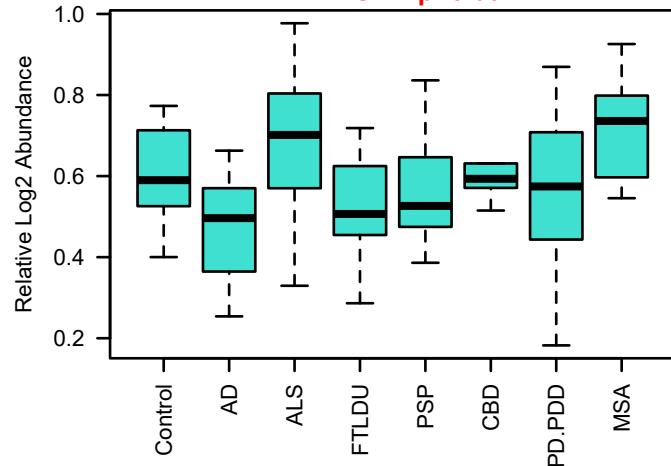

**DCLK1 UPenn Mixed PRM**  
K-W ANOVA p: 0.0099

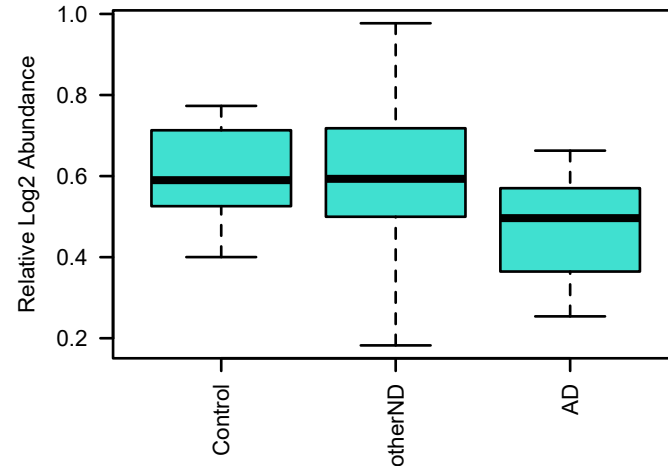

**bicor=-0.25, p=0.021**  
**cor=-0.28, p=0.0099**

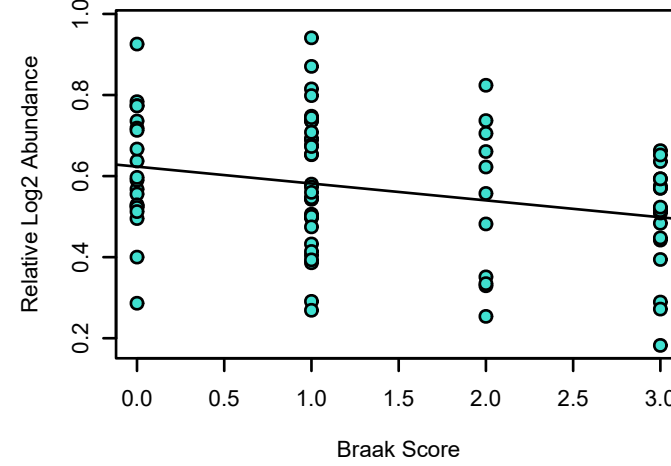

**bicor=-0.29, p=0.003**  
**cor=-0.3, p=0.0024**

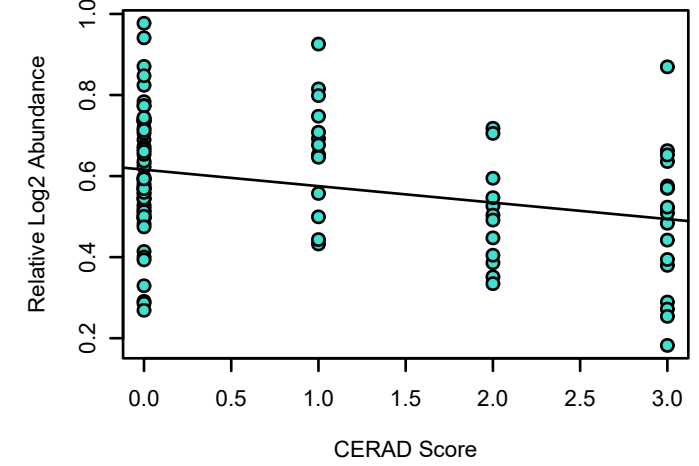

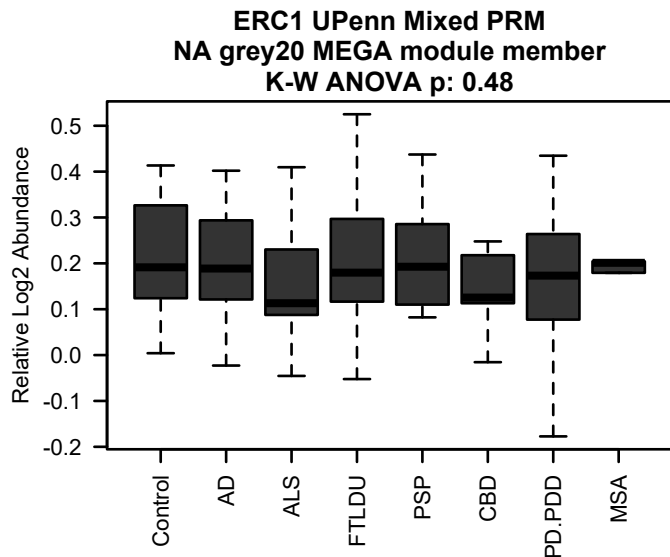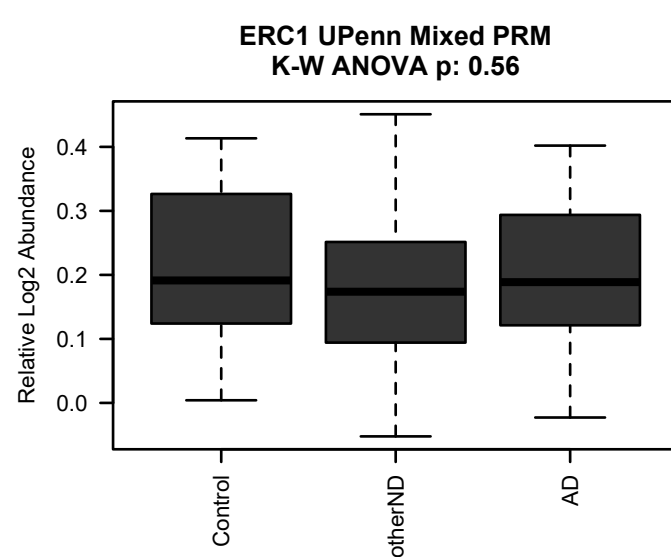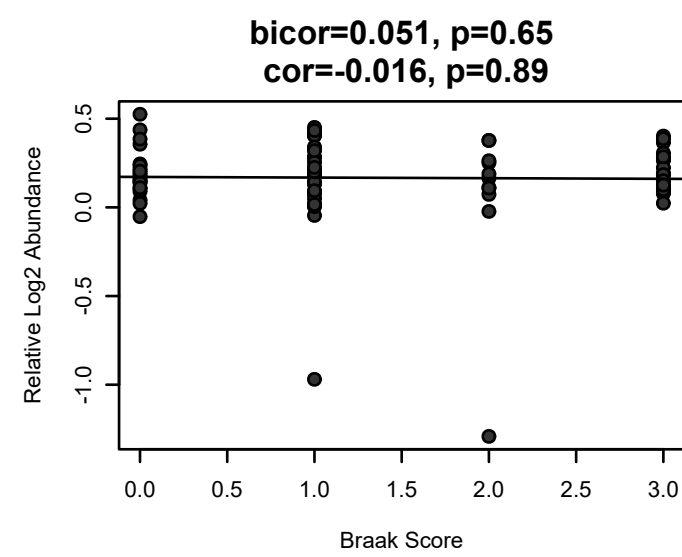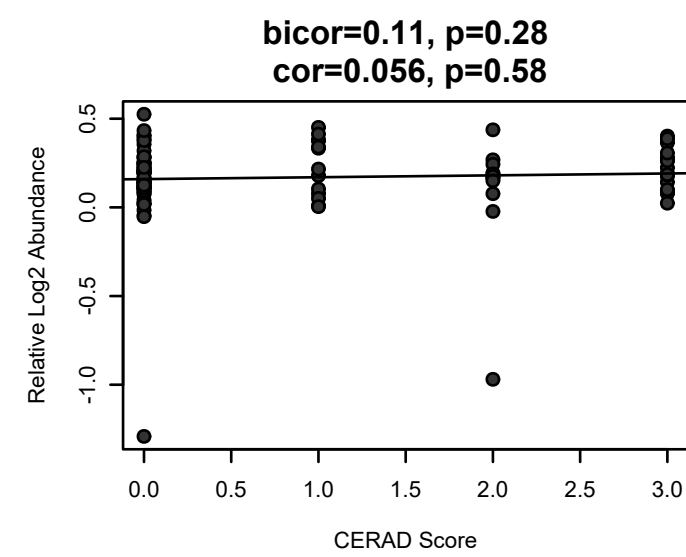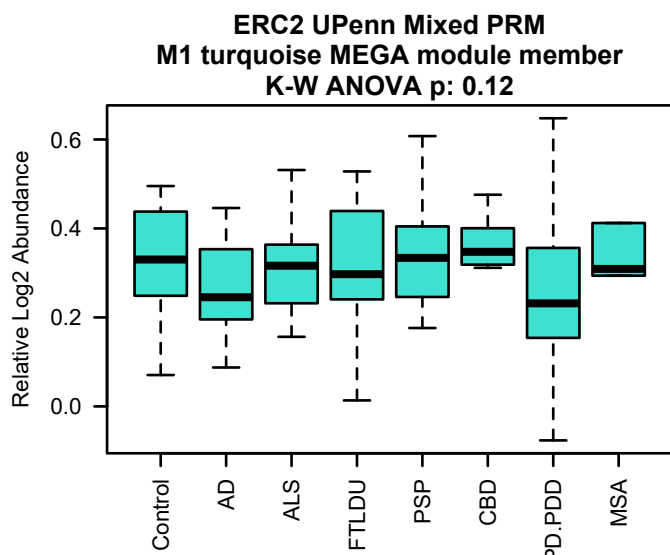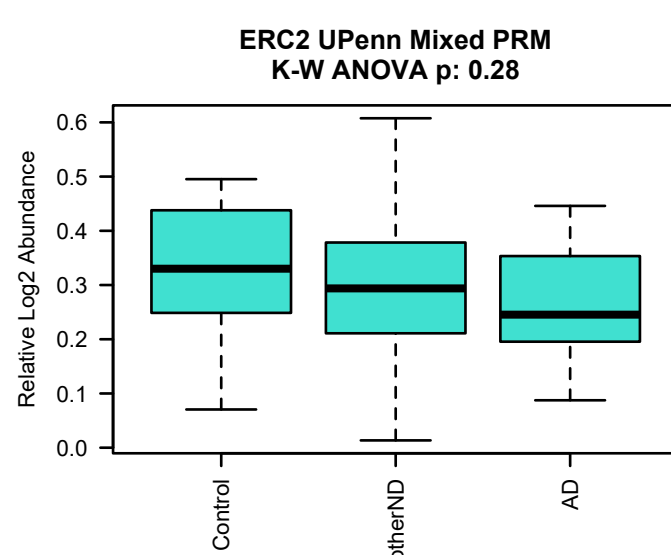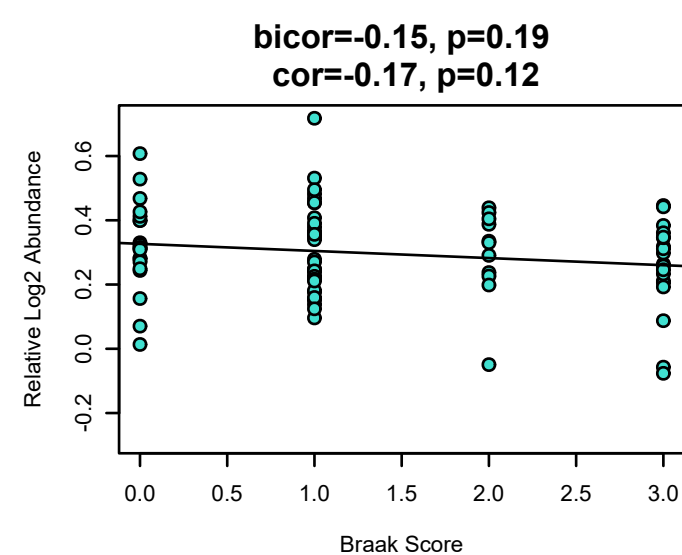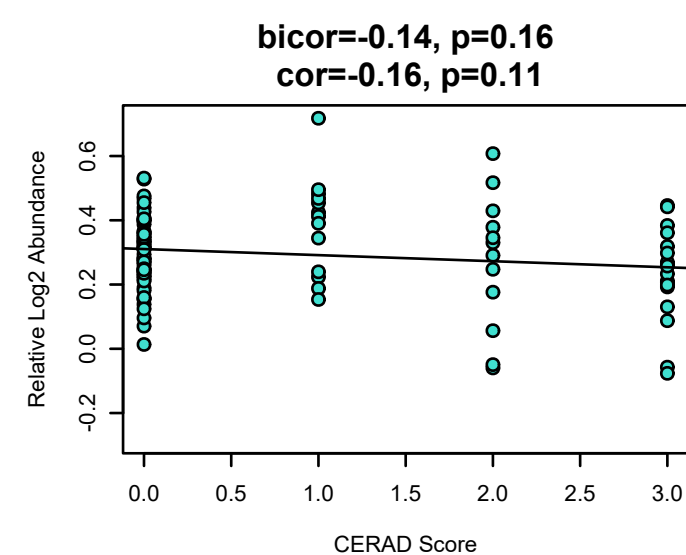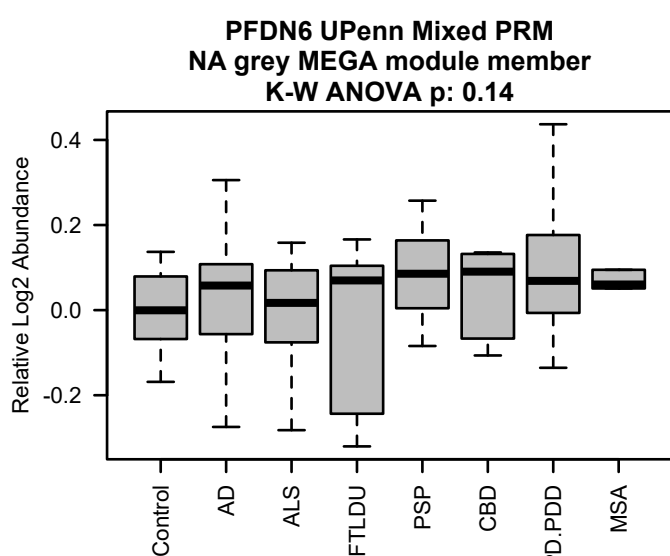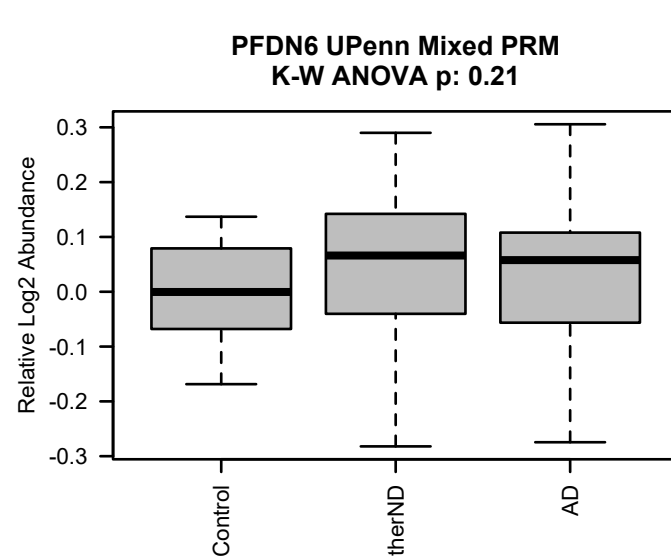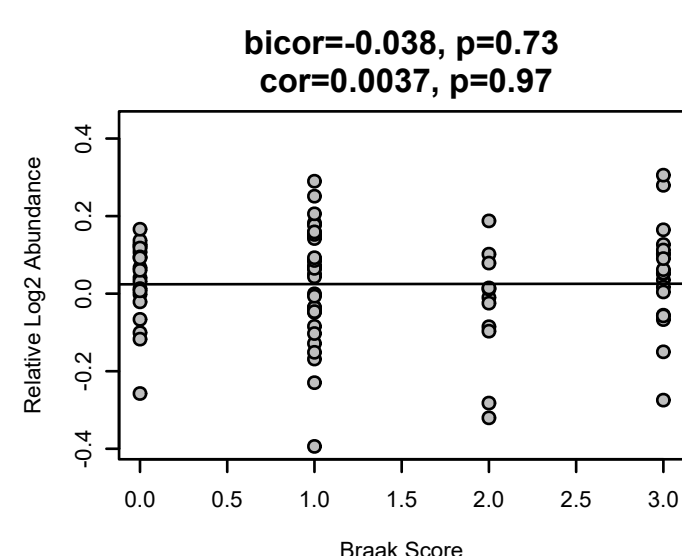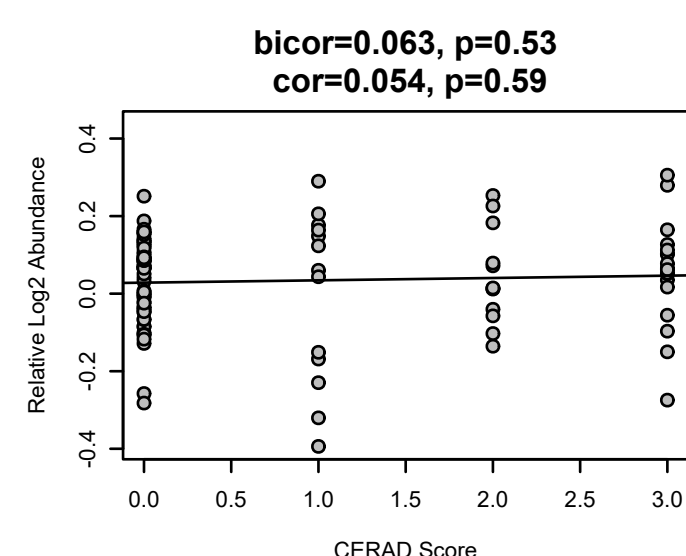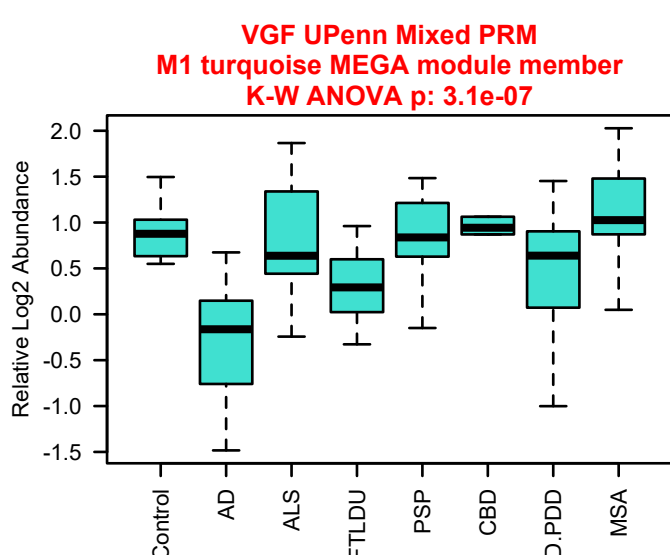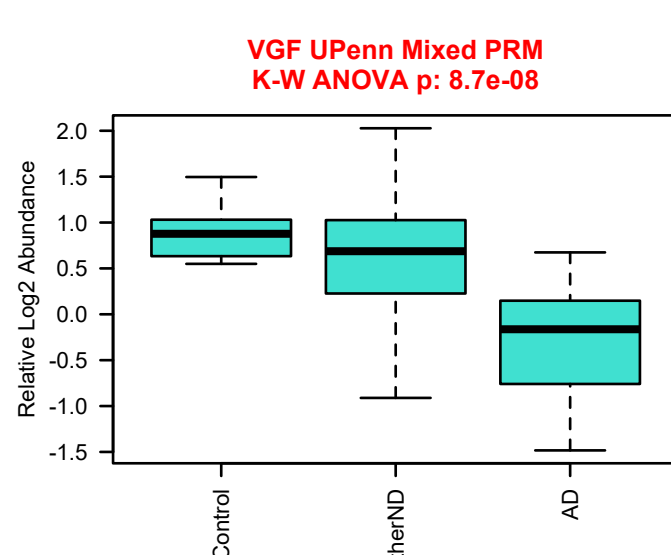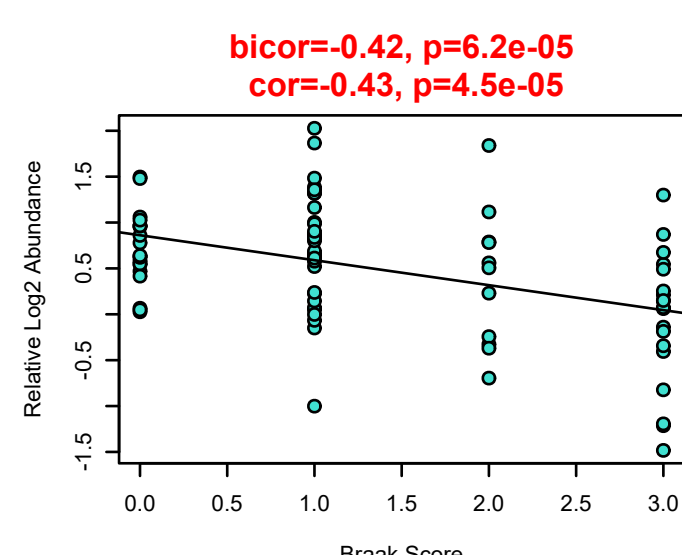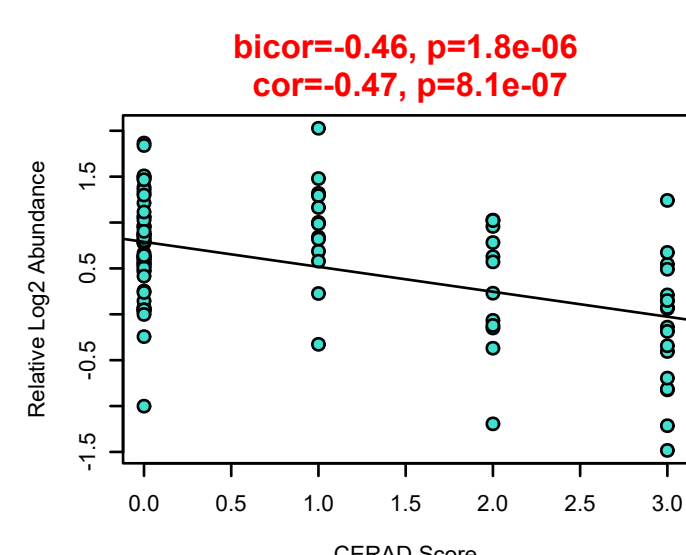

**OGT UPenn Mixed PRM**  
**M1 turquoise MEGA module member**  
**K-W ANOVA p: 0.92**

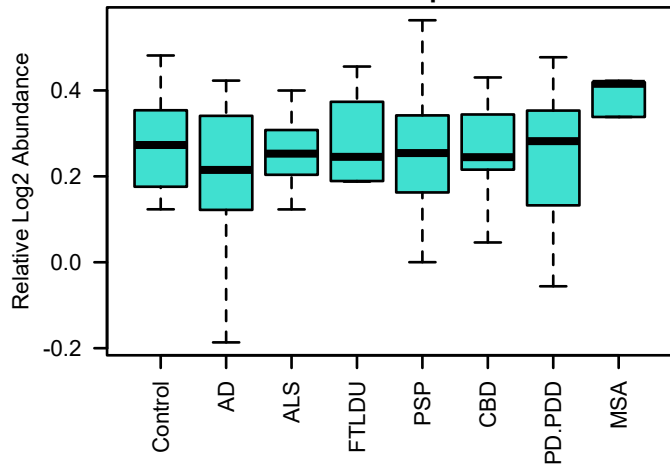

**OGT UPenn Mixed PRM**  
**K-W ANOVA p: 0.52**

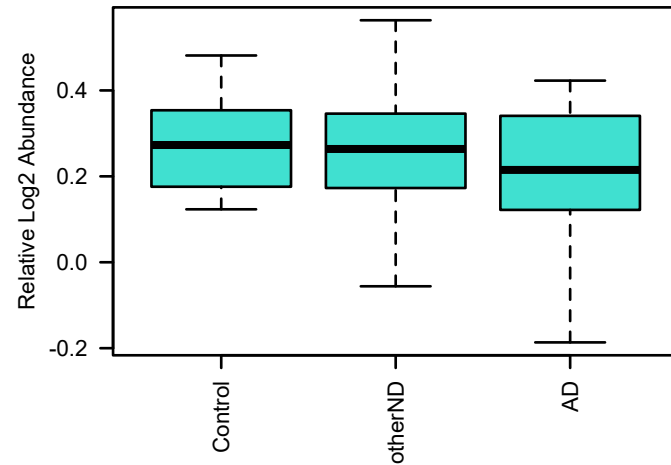

**bicor=-0.17, p=0.13**  
**cor=-0.2, p=0.068**

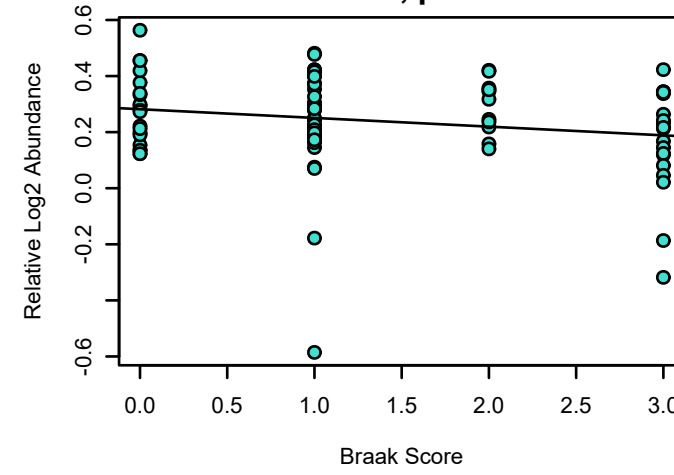

**bicor=-0.16, p=0.12**  
**cor=-0.18, p=0.073**

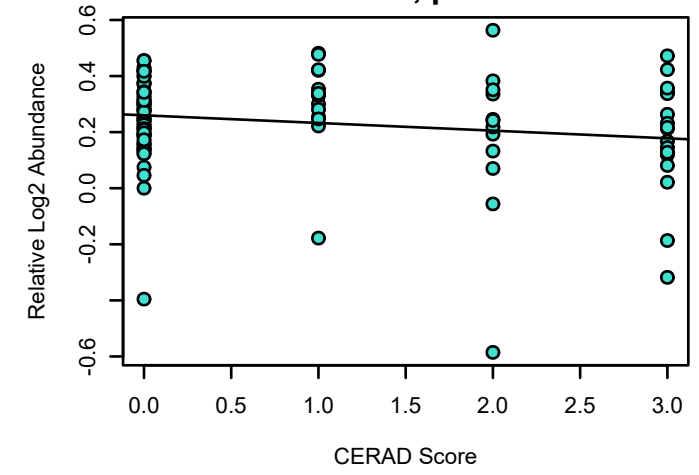

**HNRNPR UPenn Mixed PRM**  
**M10 purple MEGA module member**  
**K-W ANOVA p: 0.0049**

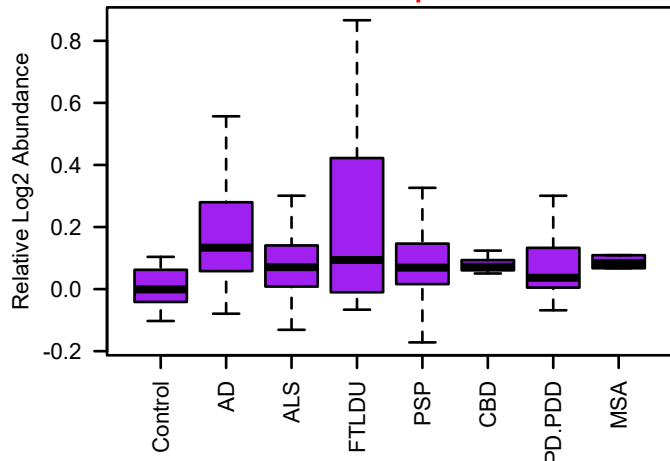

**HNRNPR UPenn Mixed PRM**  
**K-W ANOVA p: 0.0024**

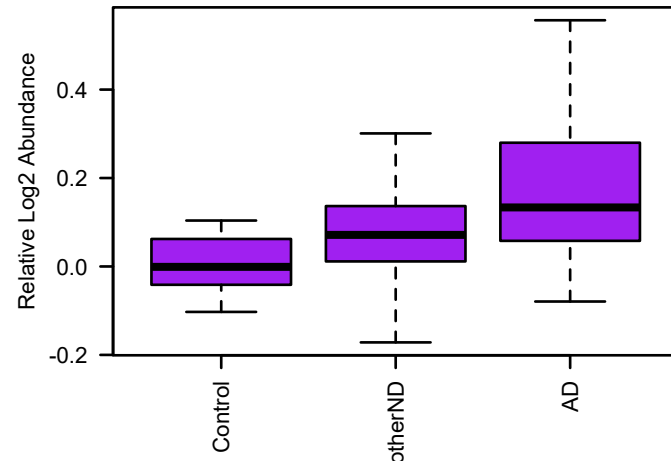

**bicor=0.26, p=0.016**  
**cor=0.28, p=0.0099**

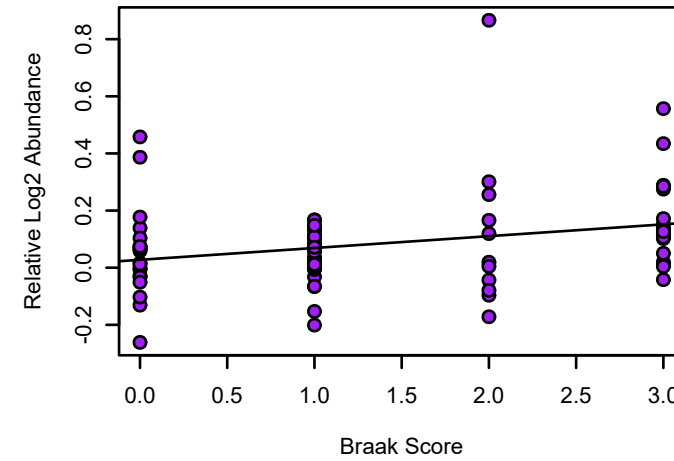

**bicor=0.28, p=0.0049**  
**cor=0.26, p=0.009**

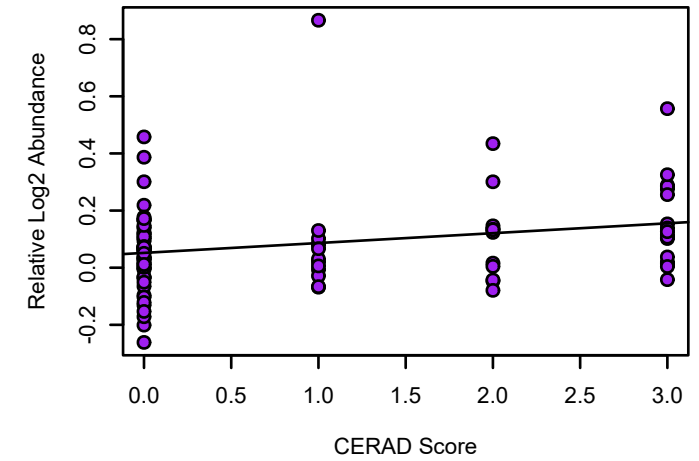

**NDUFS5 UPenn Mixed PRM**  
**M3 brown MEGA module member**  
**K-W ANOVA p: 0.0011**

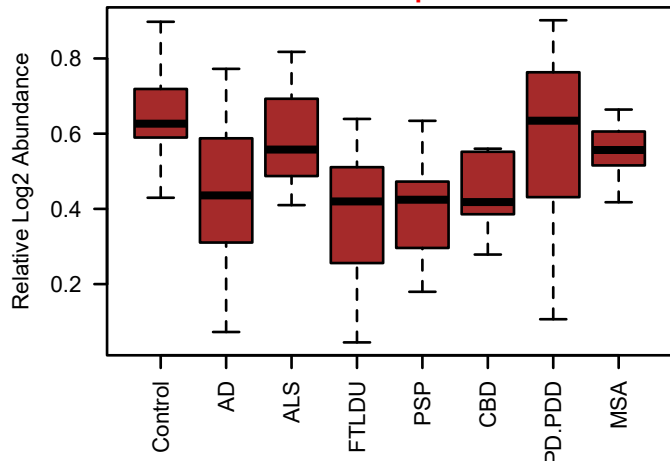

**NDUFS5 UPenn Mixed PRM**  
**K-W ANOVA p: 0.041**

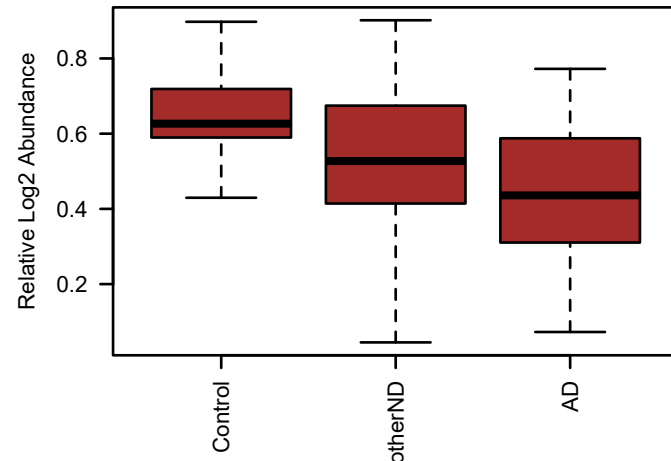

**bicor=-0.25, p=0.02**  
**cor=-0.24, p=0.028**

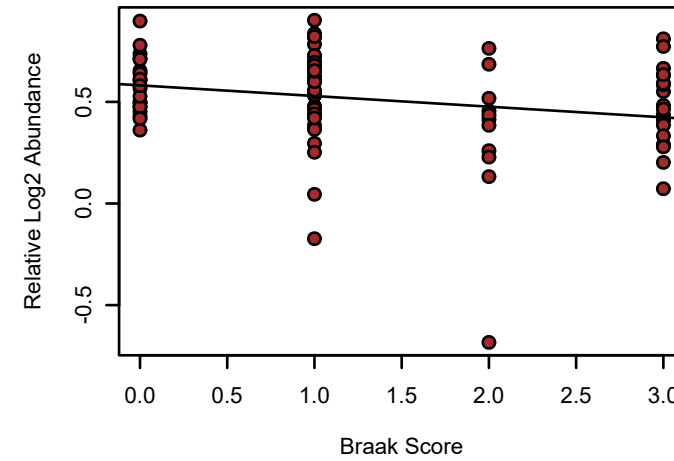

**bicor=-0.2, p=0.049**  
**cor=-0.14, p=0.16**

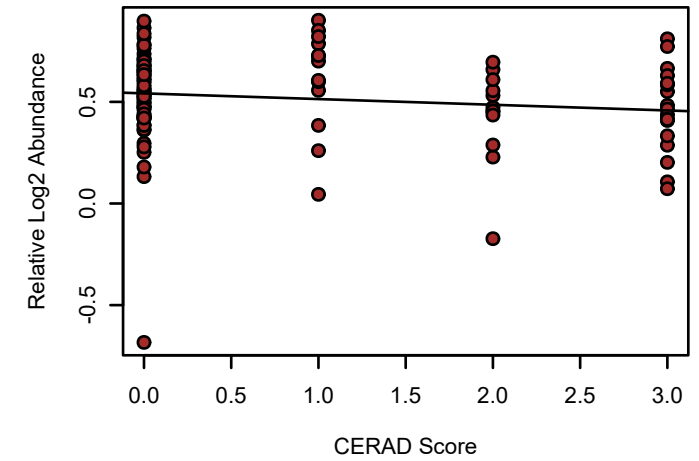

**OPA1 UPenn Mixed PRM**  
**M3 brown MEGA module member**  
**K-W ANOVA p: 0.17**

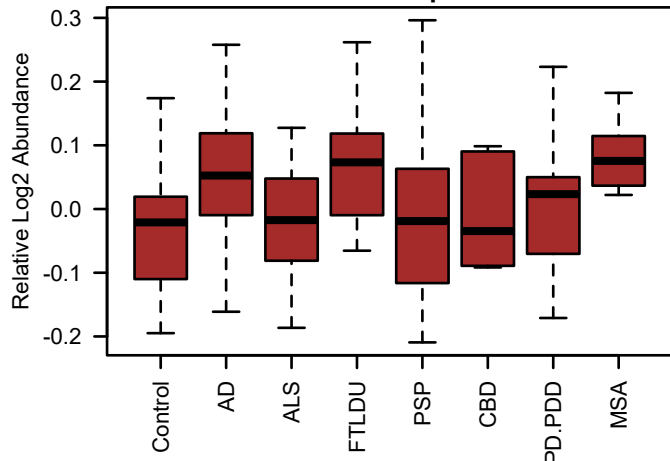

**OPA1 UPenn Mixed PRM**  
**K-W ANOVA p: 0.13**

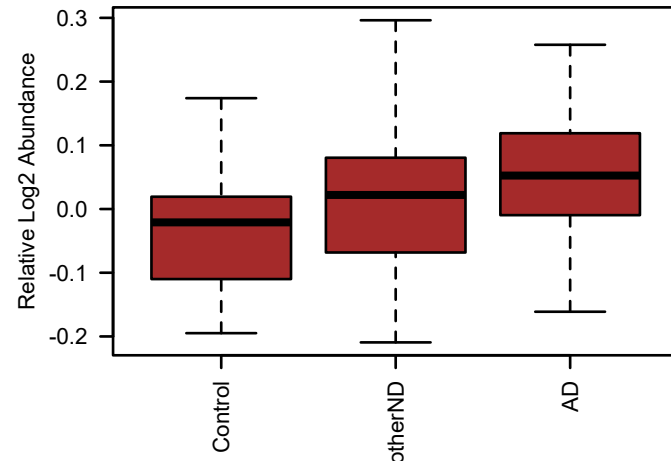

**bicor=0.12, p=0.28**  
**cor=0.14, p=0.2**

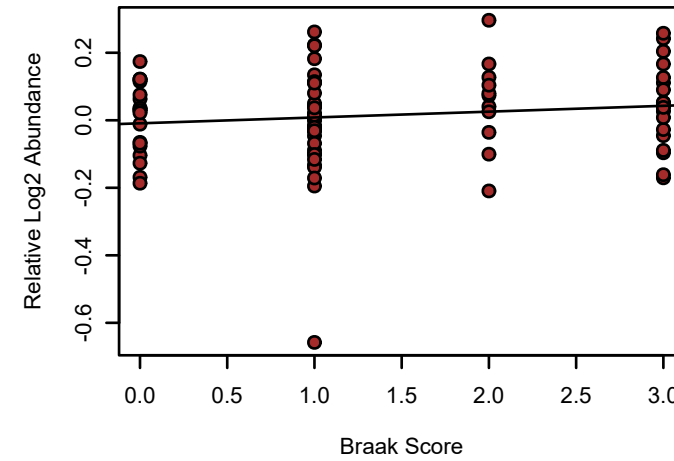

**bicor=0.081, p=0.42**  
**cor=0.023, p=0.82**

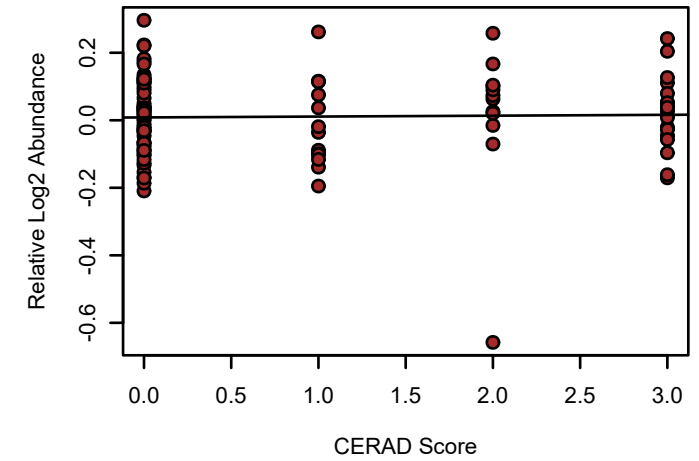

**DNAJC6 UPenn Mixed PRM**  
M1 turquoise MEGA module member  
K-W ANOVA p: 0.0021

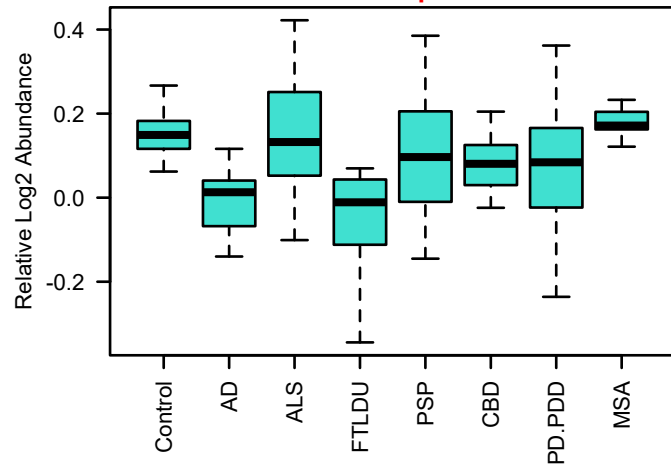

**DNAJC6 UPenn Mixed PRM**  
K-W ANOVA p: 0.0045

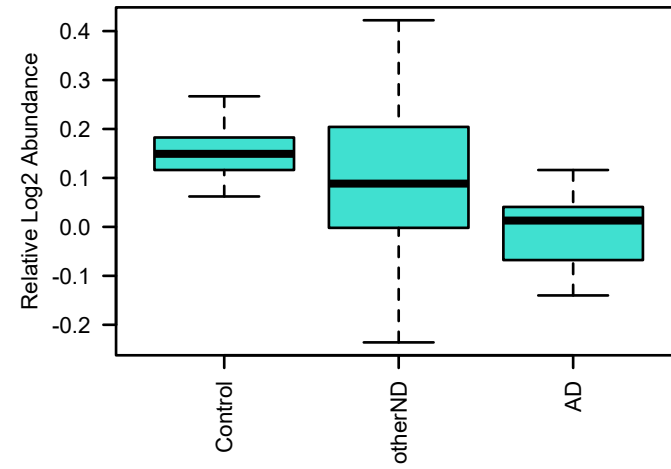

**bicor=-0.35, p=0.00098**  
**cor=-0.36, p=0.00077**

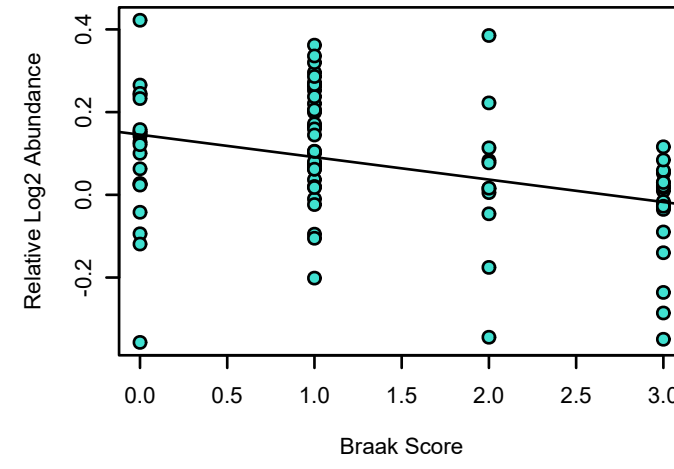

**bicor=-0.37, p=0.00014**  
**cor=-0.35, p=0.00036**

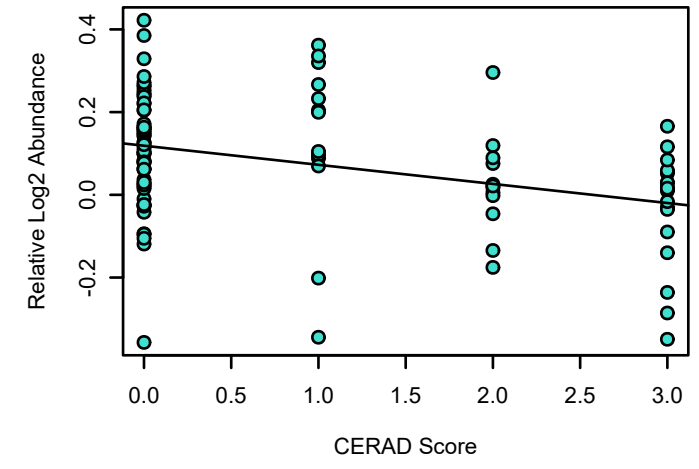

**WDR1 UPenn Mixed PRM**  
NA grey MEGA module member  
K-W ANOVA p: 0.00014

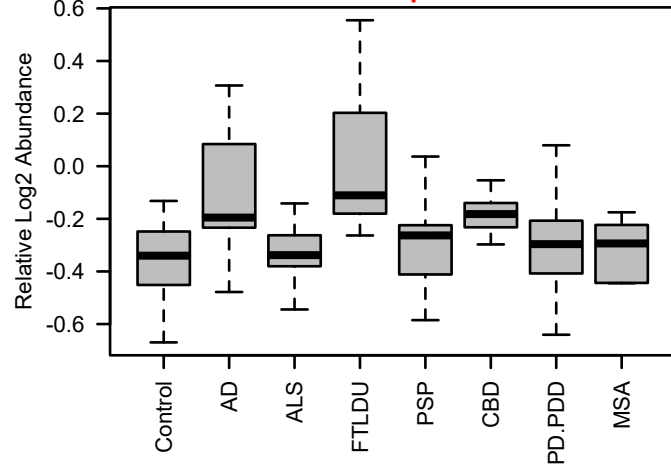

**WDR1 UPenn Mixed PRM**  
K-W ANOVA p: 0.0035

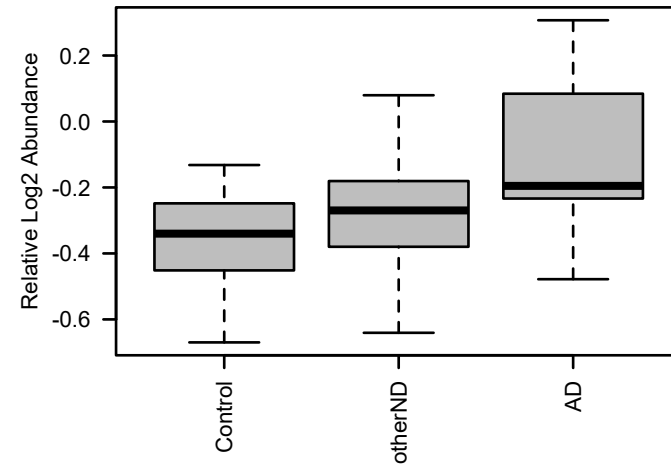

**bicor=0.29, p=0.0071**  
**cor=0.27, p=0.013**

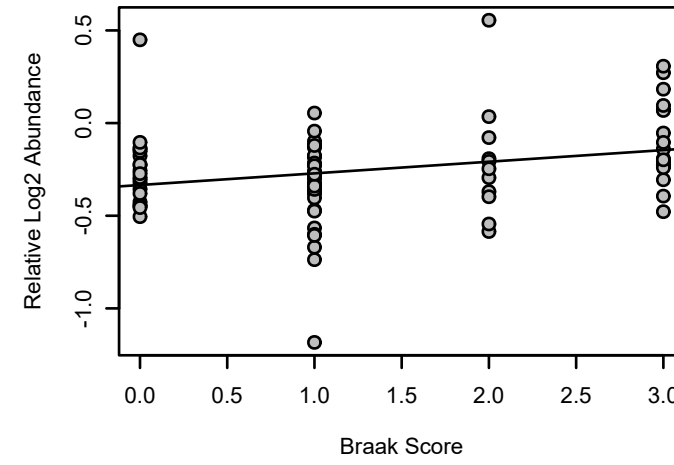

**bicor=0.27, p=0.0074**  
**cor=0.22, p=0.028**

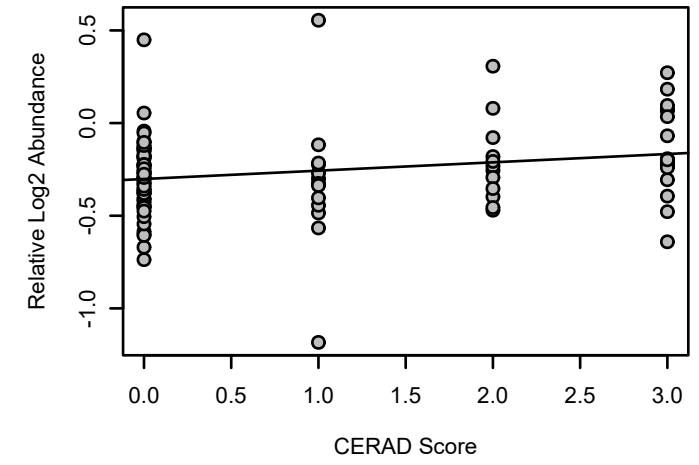

**NDUFS7 UPenn Mixed PRM**  
M3 brown MEGA module member  
K-W ANOVA p: 0.0018

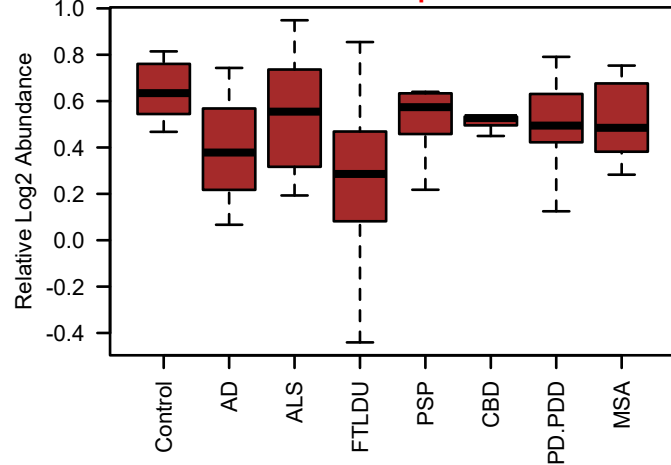

**NDUFS7 UPenn Mixed PRM**  
K-W ANOVA p: 0.0031

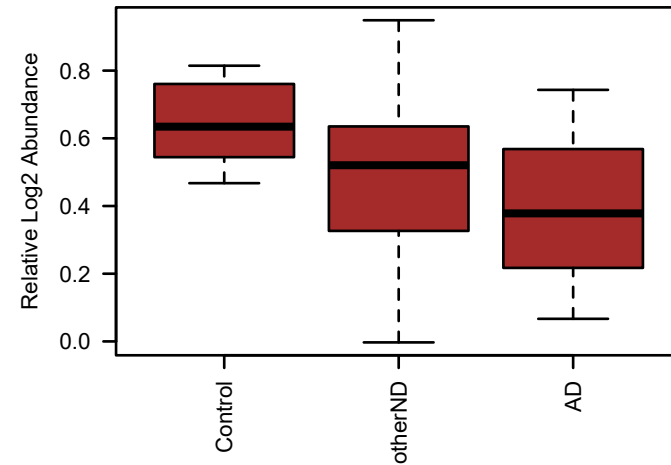

**bicor=-0.3, p=0.0058**  
**cor=-0.29, p=0.0075**

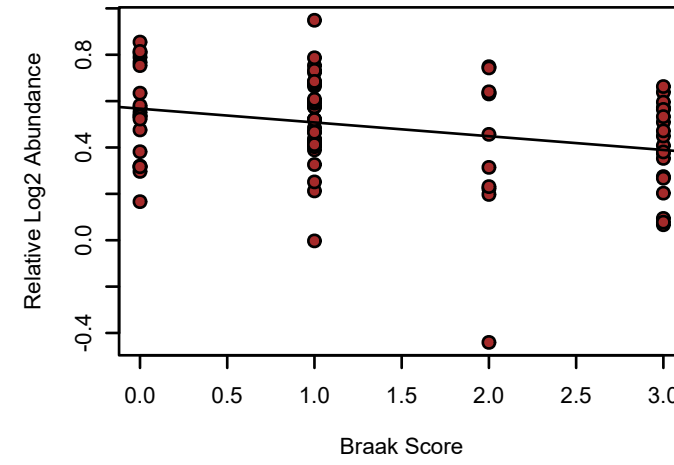

**bicor=-0.28, p=0.005**  
**cor=-0.27, p=0.0066**

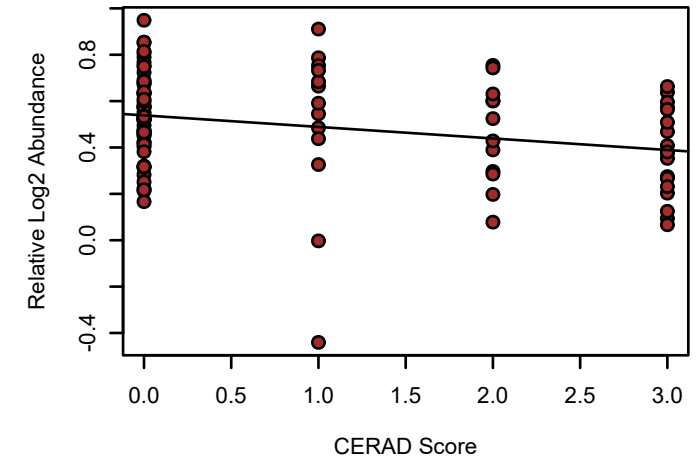

**NDUFS2 UPenn Mixed PRM**  
M3 brown MEGA module member  
K-W ANOVA p: 0.00013

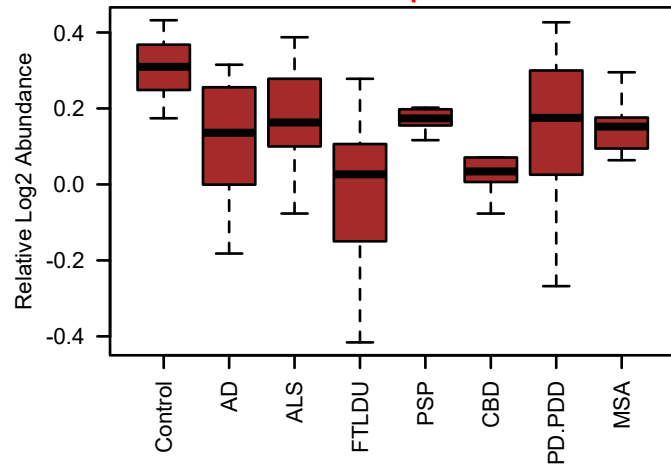

**NDUFS2 UPenn Mixed PRM**  
K-W ANOVA p: 0.00028

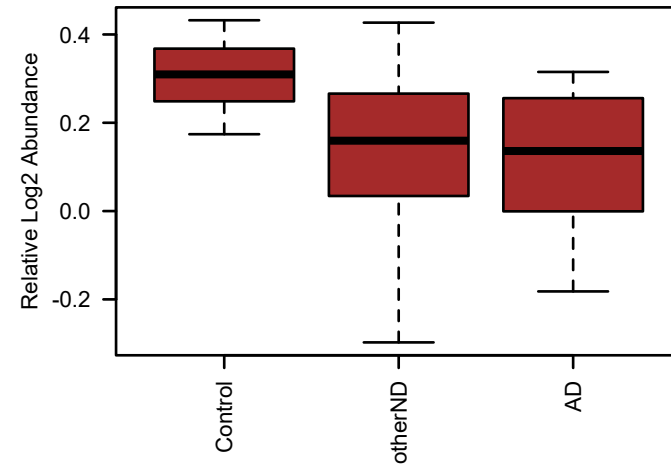

**bicor=-0.28, p=0.01**  
**cor=-0.28, p=0.0099**

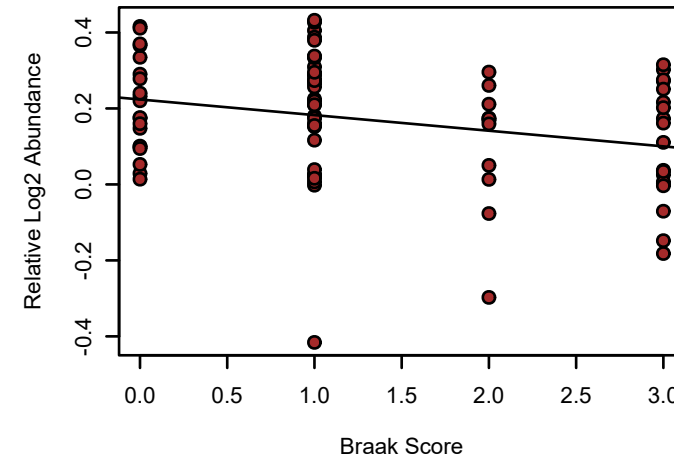

**bicor=-0.22, p=0.027**  
**cor=-0.22, p=0.028**

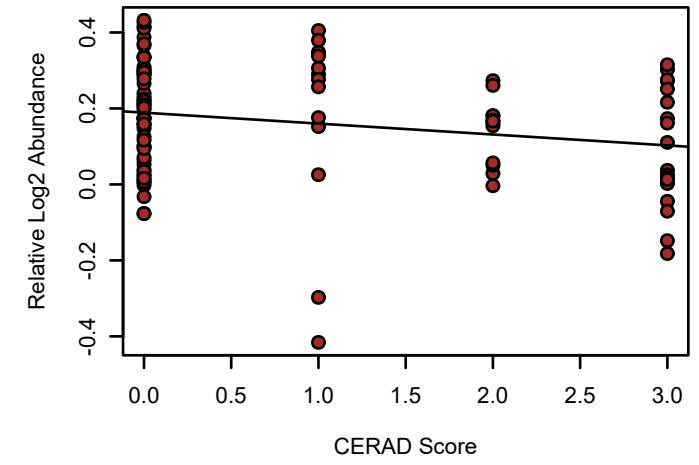



**H2AFY UPenn Mixed PRM**  
**M10 purple MEGA module member**  
**K-W ANOVA p: 4.8e-05**

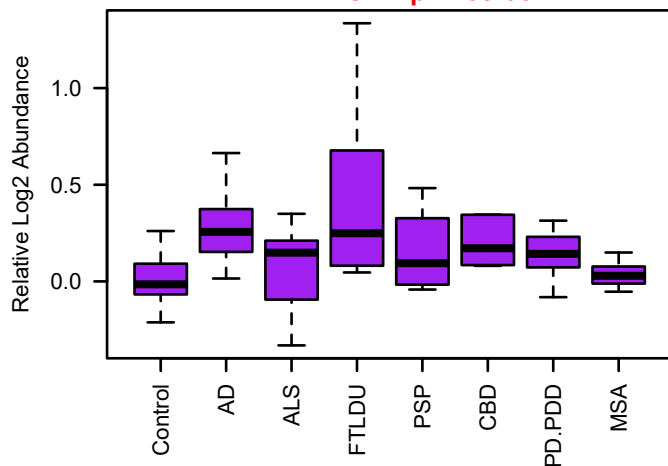

**H2AFY UPenn Mixed PRM**  
**K-W ANOVA p: 0.00093**

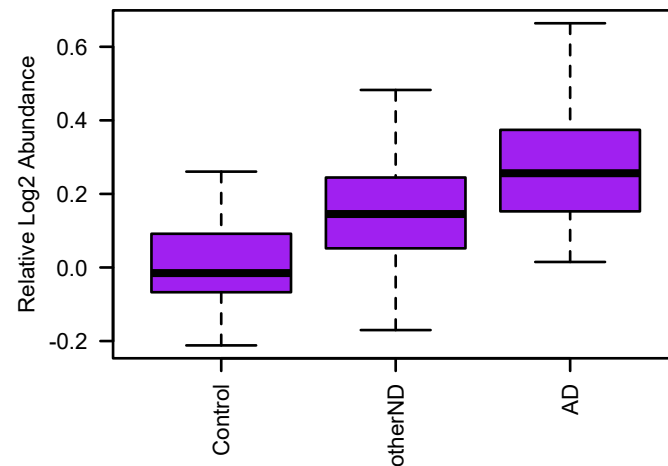

**bicor=0.41, p=0.00012**  
**cor=0.34, p=0.0016**

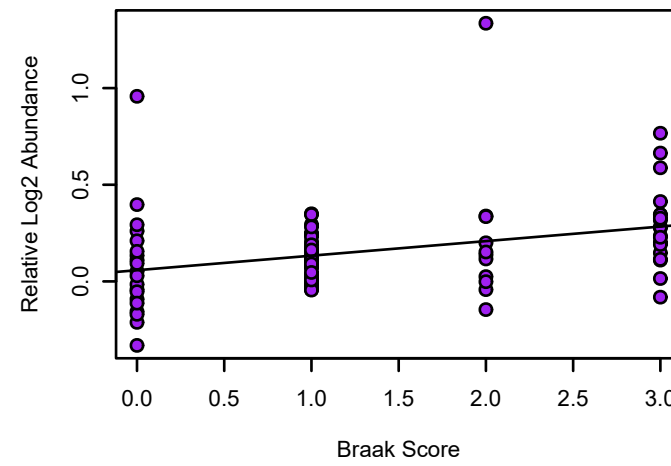

**bicor=0.26, p=0.0081**  
**cor=0.22, p=0.028**

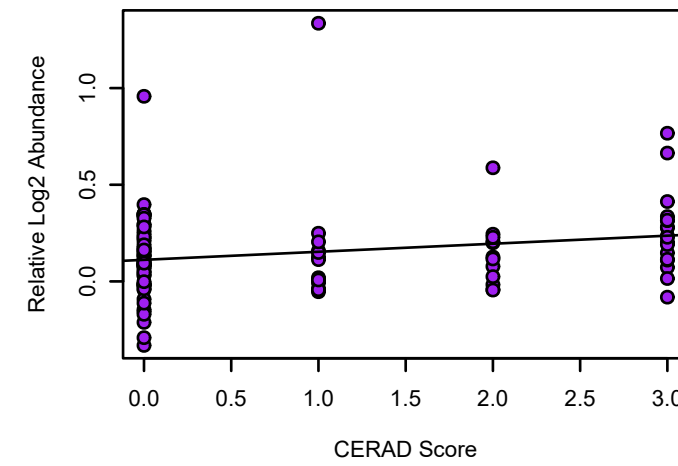

**H2AFY2 UPenn Mixed PRM**  
**NA grey20 MEGA module member**  
**K-W ANOVA p: 7.1e-06**

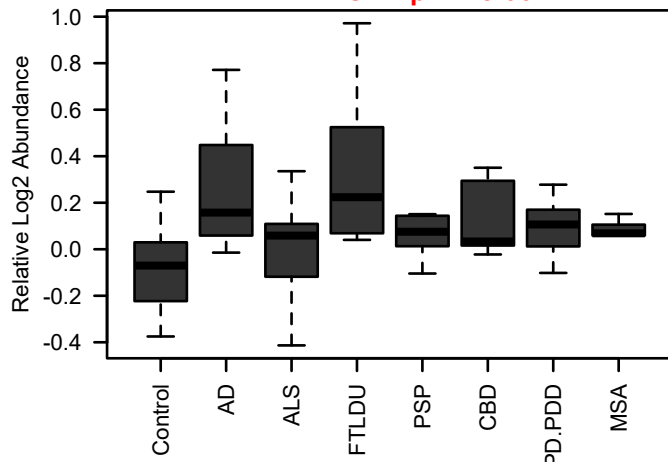

**H2AFY2 UPenn Mixed PRM**  
**K-W ANOVA p: 3.9e-05**

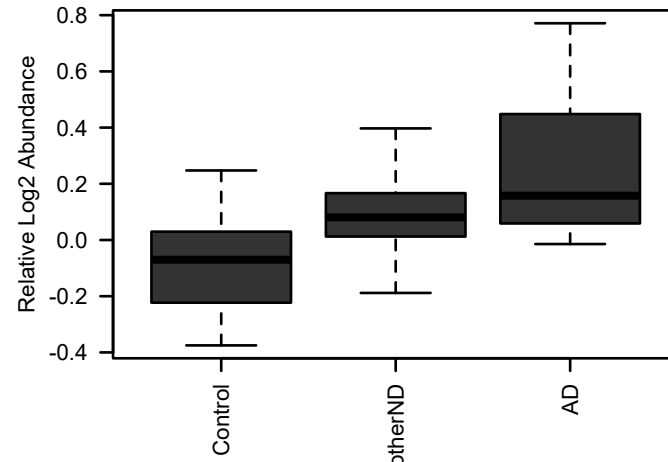

**bicor=0.39, p=0.00025**  
**cor=0.4, p=0.00016**

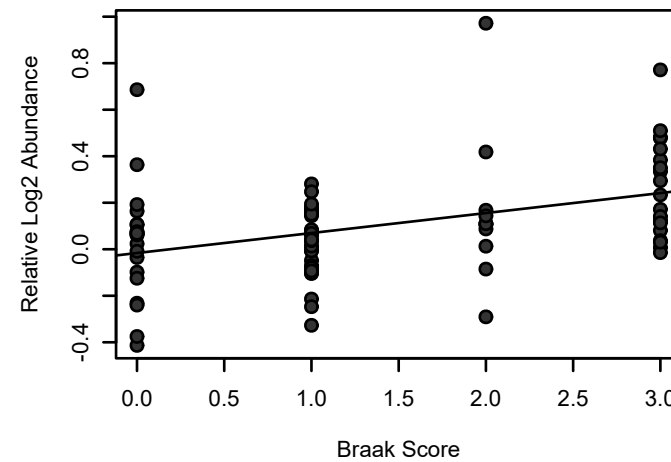

**bicor=0.31, p=0.0018**  
**cor=0.31, p=0.0017**

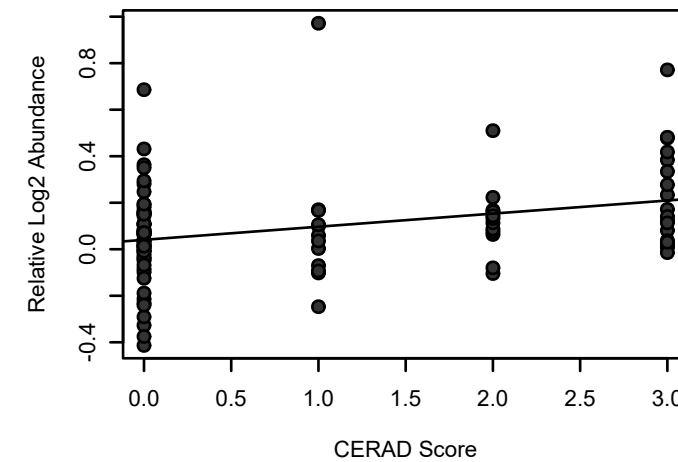

**PSIP1 UPenn Mixed PRM**  
**M10 purple MEGA module member**  
**K-W ANOVA p: 0.35**

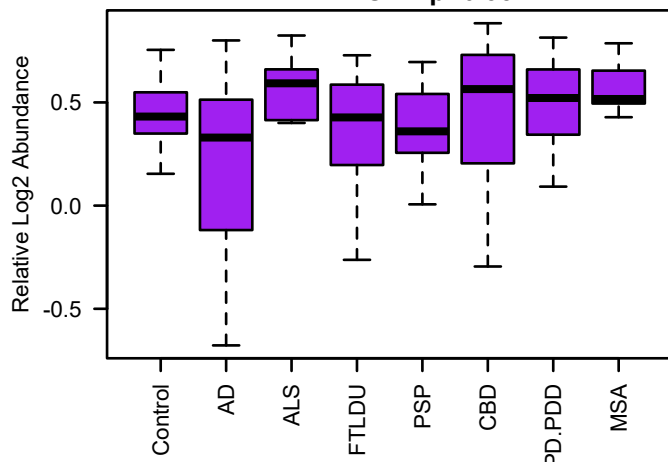

**PSIP1 UPenn Mixed PRM**  
**K-W ANOVA p: 0.043**

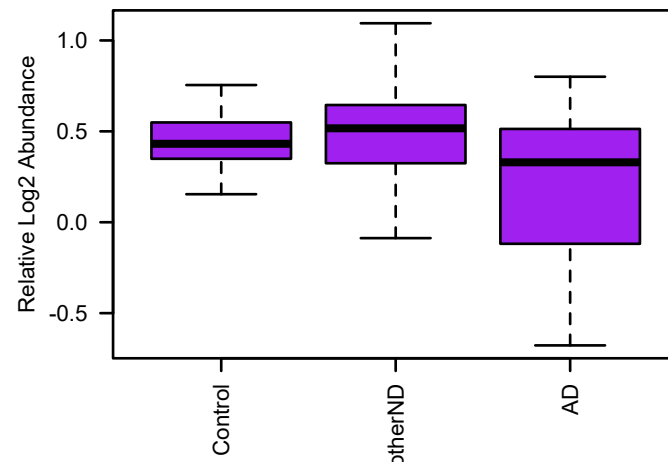

**bicor=-0.14, p=0.21**  
**cor=-0.13, p=0.24**

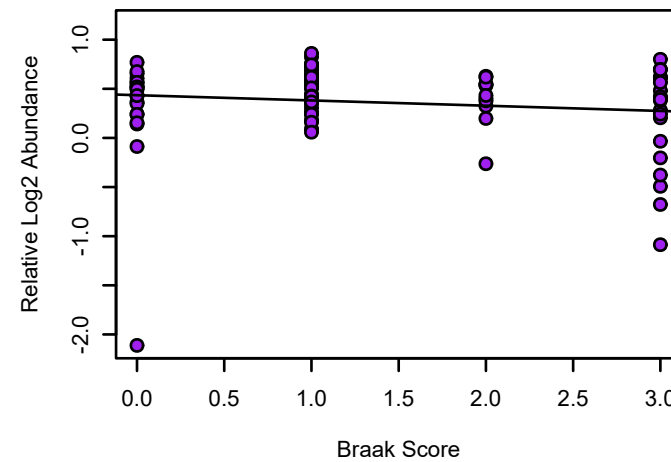

**bicor=-0.19, p=0.059**  
**cor=-0.2, p=0.046**

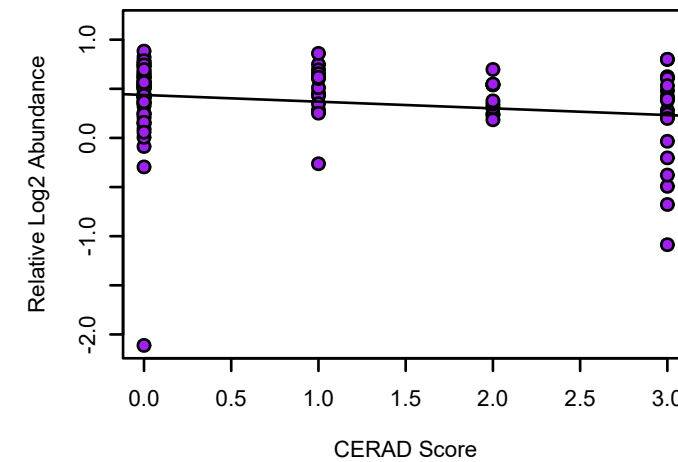

**NDUFS3 UPenn Mixed PRM**  
**M3 brown MEGA module member**  
**K-W ANOVA p: 0.0061**

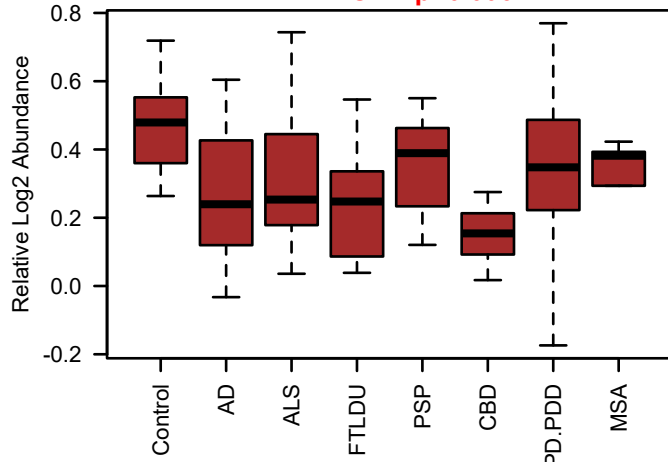

**NDUFS3 UPenn Mixed PRM**  
**K-W ANOVA p: 0.0056**

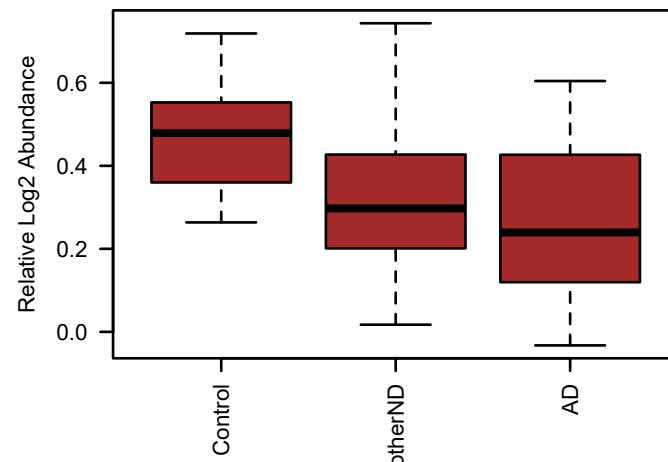

**bicor=-0.25, p=0.021**  
**cor=-0.26, p=0.017**

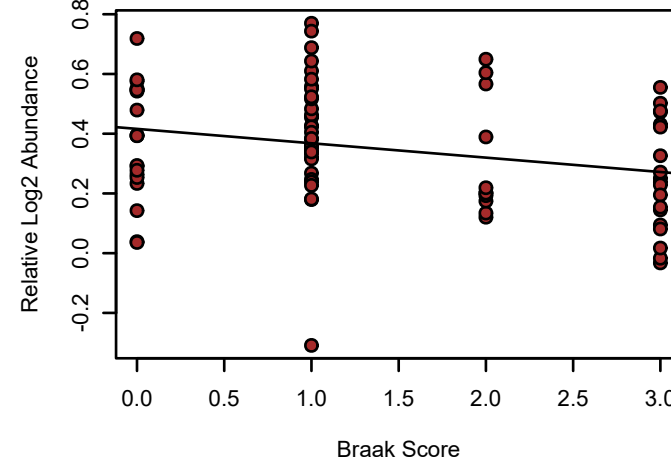

**bicor=-0.23, p=0.019**  
**cor=-0.23, p=0.021**

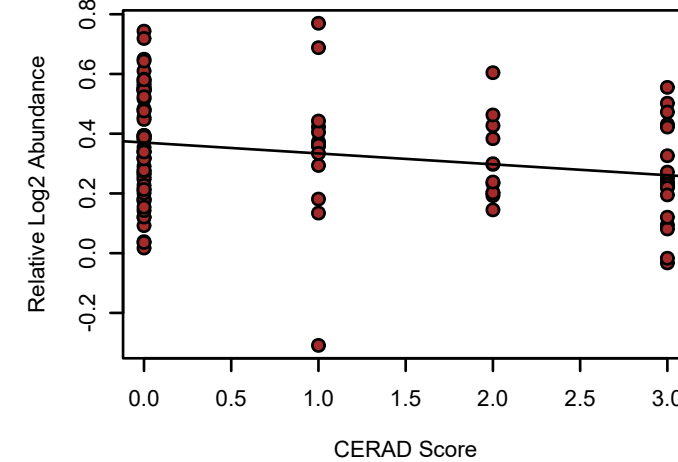

**PALM red MEGA module member**  
M6 red MEGA module member  
K-W ANOVA p: 0.28

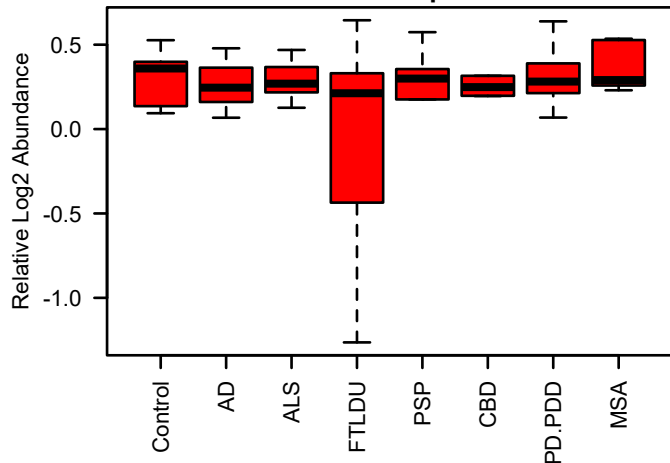

**PALM UPenn Mixed PRM**  
K-W ANOVA p: 0.85

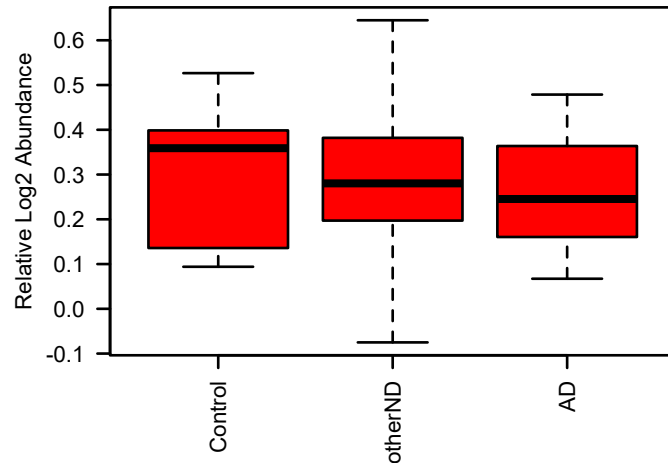

**bicor=-0.028, p=0.8**  
**cor=0.12, p=0.28**

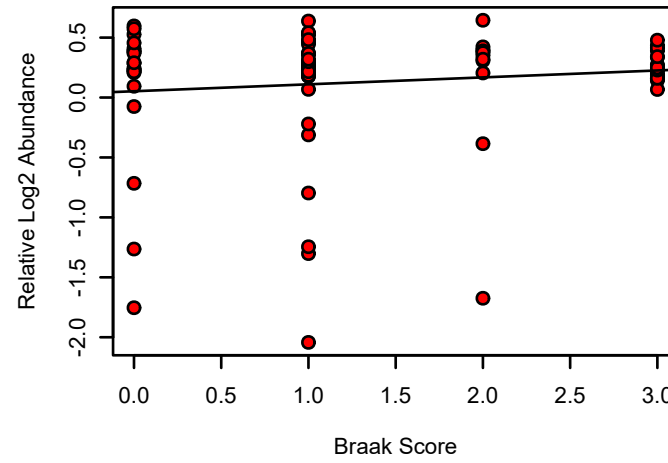

**bicor=-0.15, p=0.13**  
**cor=0.073, p=0.47**

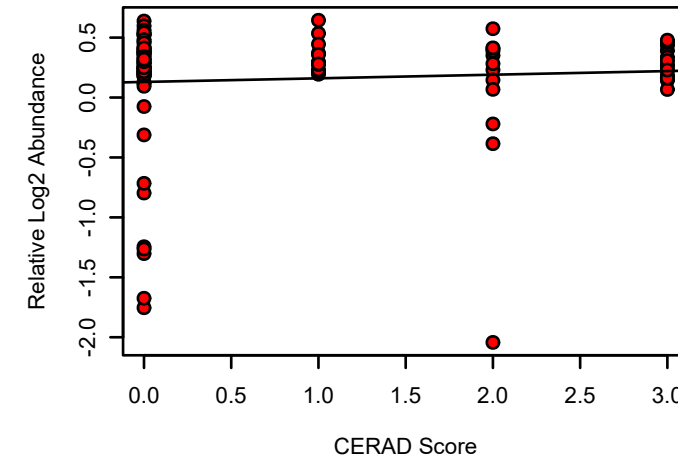

**ATP5H UPenn Mixed PRM**  
M3 brown MEGA module member  
K-W ANOVA p: 0.81

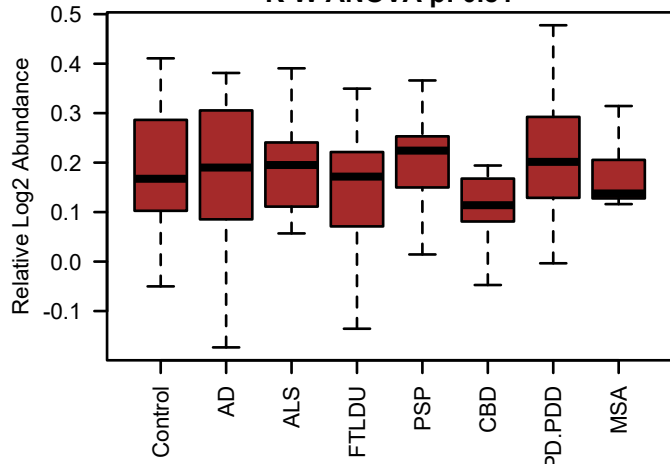

**ATP5H UPenn Mixed PRM**  
K-W ANOVA p: 0.84

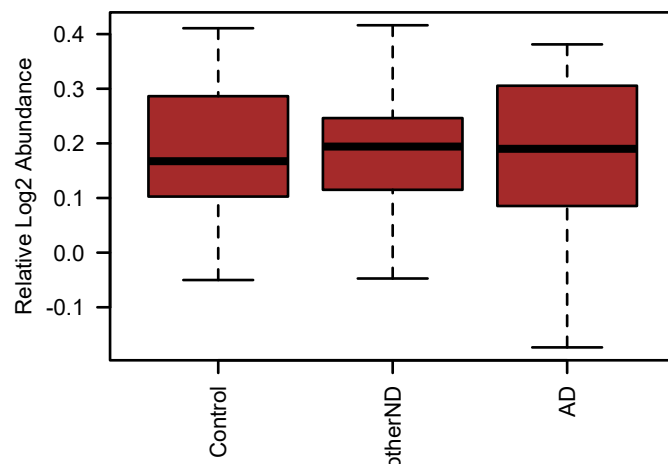

**bicor=-0.031, p=0.78**  
**cor=-0.08, p=0.47**

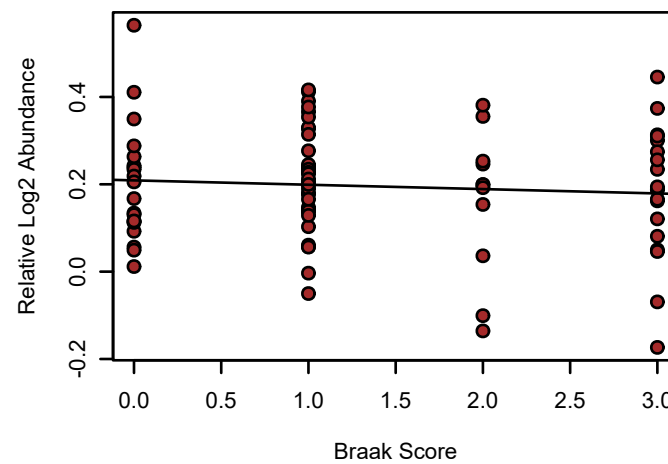

**bicor=0.057, p=0.57**  
**cor=0.027, p=0.79**

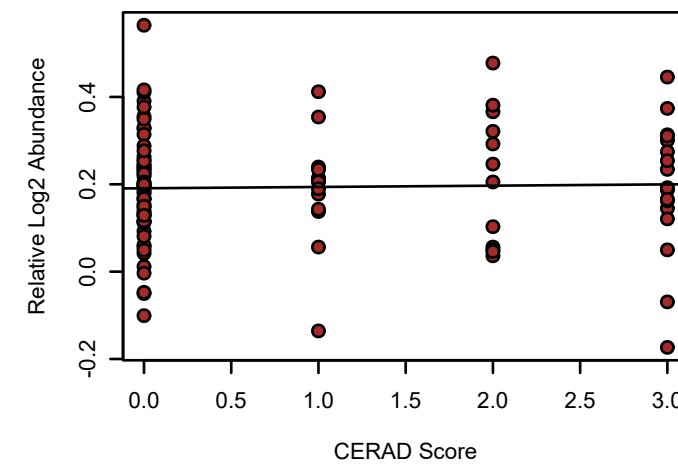

**AP2A2 UPenn Mixed PRM**  
M1 turquoise MEGA module member  
K-W ANOVA p: 0.014

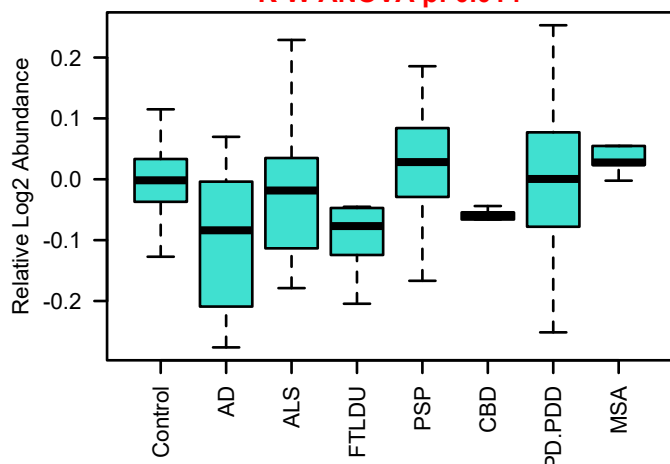

**AP2A2 UPenn Mixed PRM**  
K-W ANOVA p: 0.014

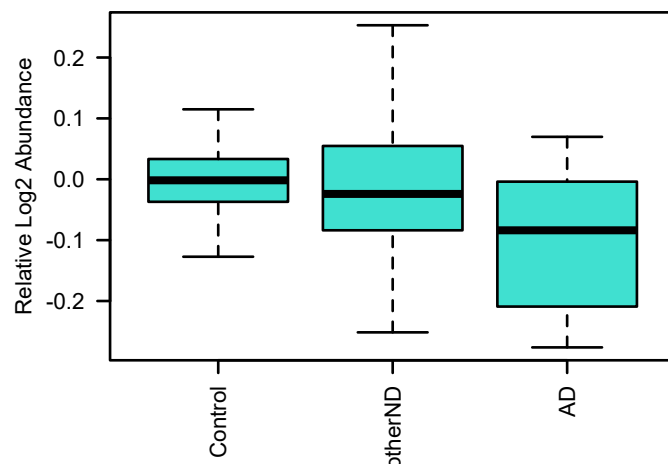

**bicor=-0.19, p=0.076**  
**cor=-0.2, p=0.068**

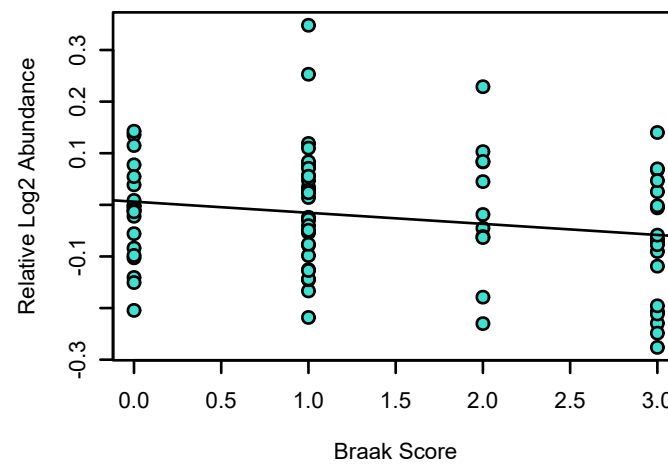

**bicor=-0.17, p=0.084**  
**cor=-0.18, p=0.073**

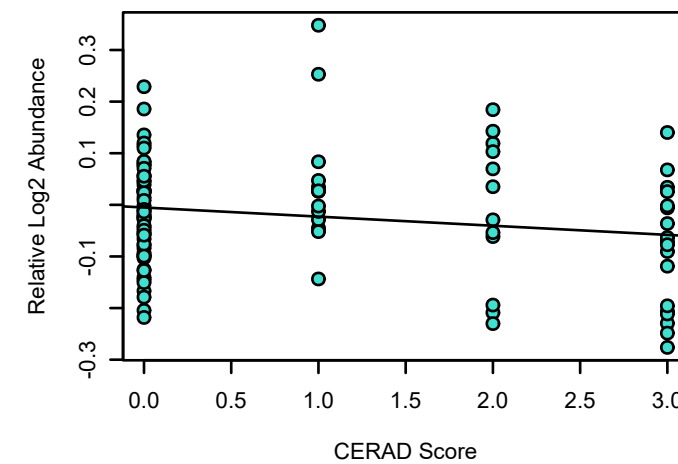

**DIRAS1 UPenn Mixed PRM**  
NA grey MEGA module member  
K-W ANOVA p: 0.028

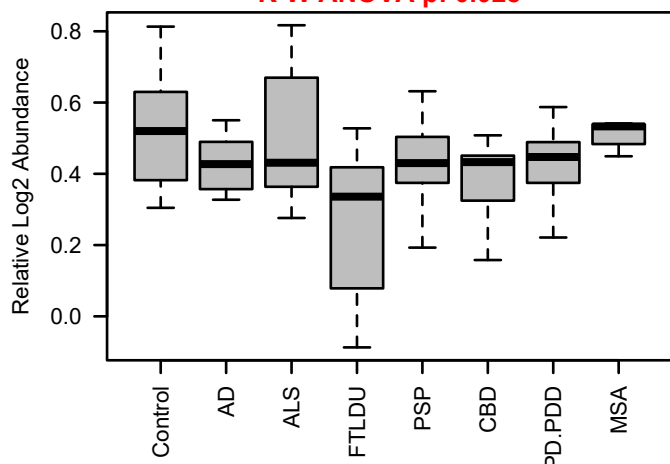

**DIRAS1 UPenn Mixed PRM**  
K-W ANOVA p: 0.24

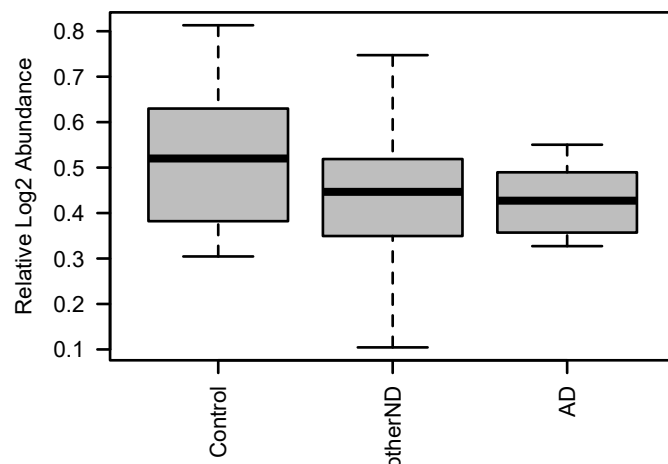

**bicor=-0.092, p=0.4**  
**cor=-0.1, p=0.37**

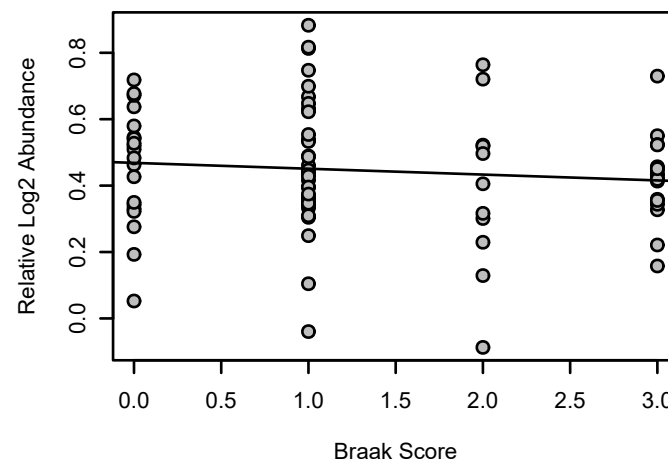

**bicor=-0.14, p=0.17**  
**cor=-0.12, p=0.23**

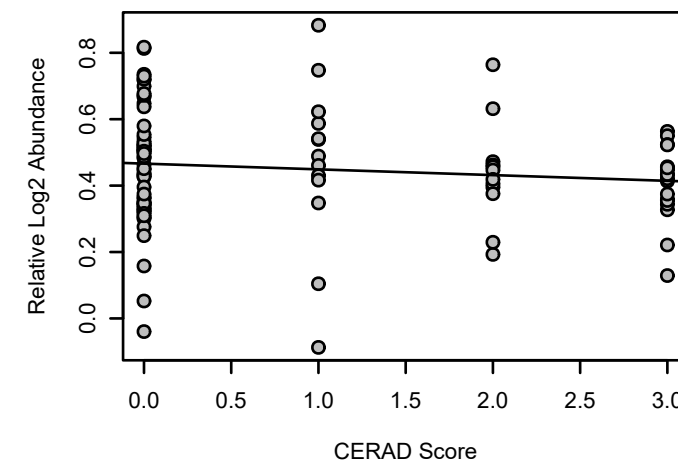

**RTN3 UPenn Mixed PRM**  
M6 red MEGA module member  
K-W ANOVA p: 0.17

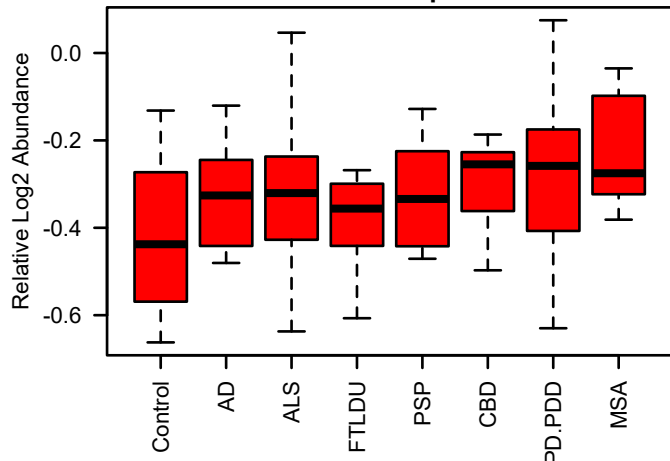

**RTN3 UPenn Mixed PRM**  
K-W ANOVA p: 0.024

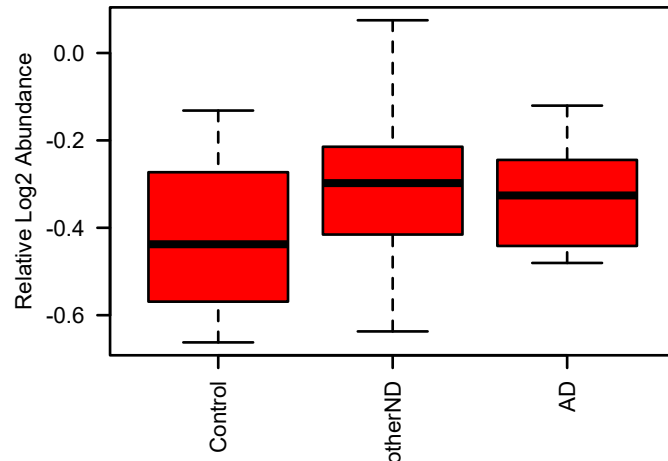

**bicor=0.032, p=0.77**  
**cor=0.019, p=0.86**

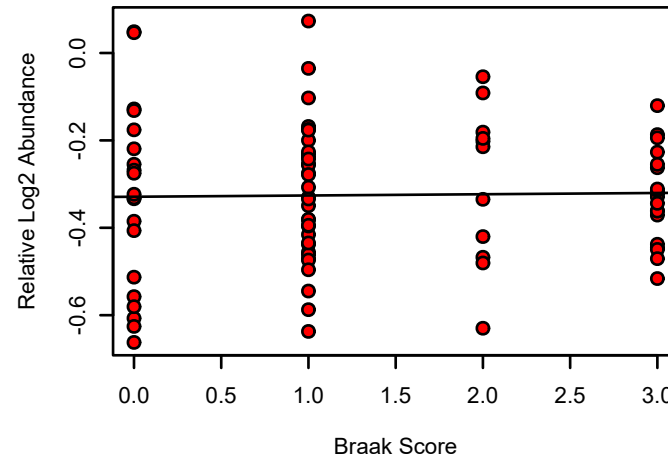

**bicor=0.013, p=0.9**  
**cor=0.0066, p=0.95**

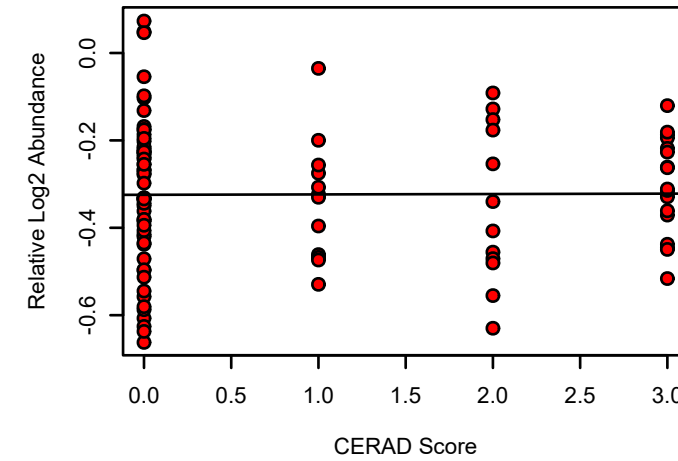

**LETM1 UPenn Mixed PRM**  
M1 turquoise MEGA module member  
K-W ANOVA p: 0.15

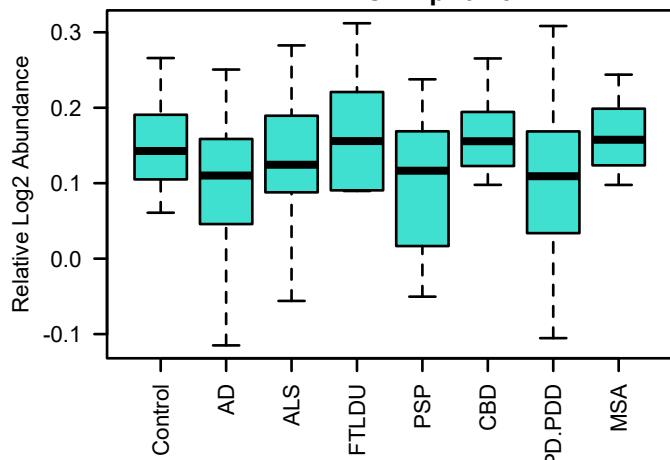

**LETM1 UPenn Mixed PRM**  
K-W ANOVA p: 0.21

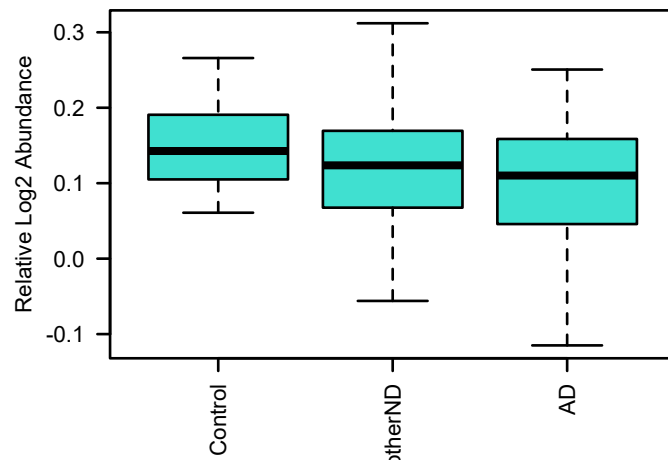

**bicor=-0.25, p=0.02**  
**cor=-0.27, p=0.013**

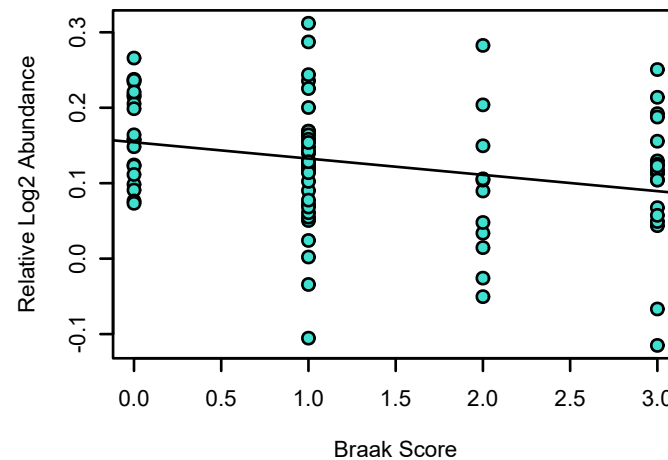

**bicor=-0.19, p=0.058**  
**cor=-0.19, p=0.058**

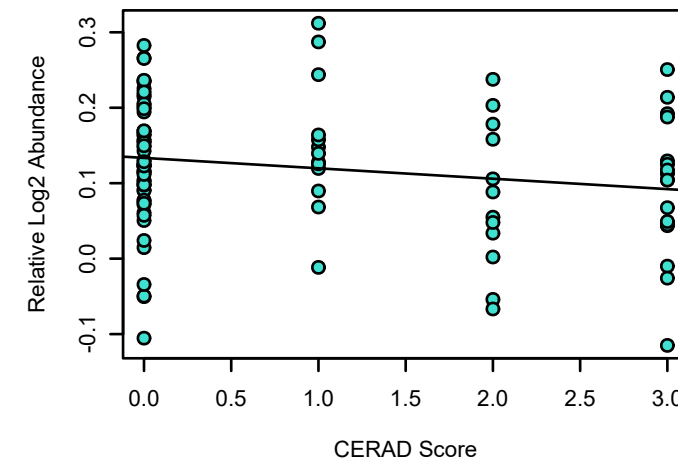

**PGLS UPenn Mixed PRM**  
M4 yellow MEGA module member  
K-W ANOVA p: 1e-05

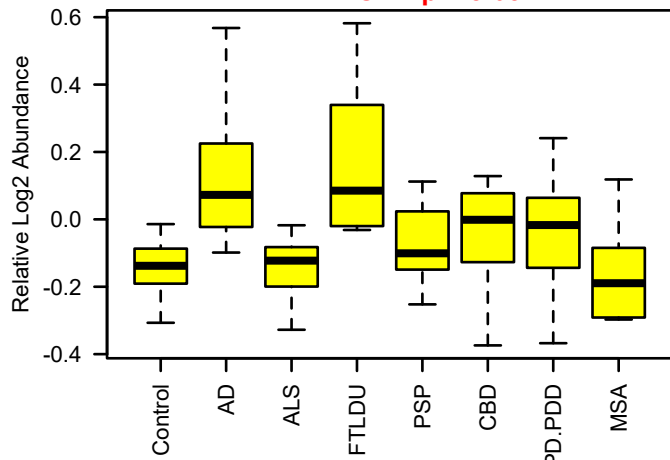

**PGLS UPenn Mixed PRM**  
K-W ANOVA p: 0.001

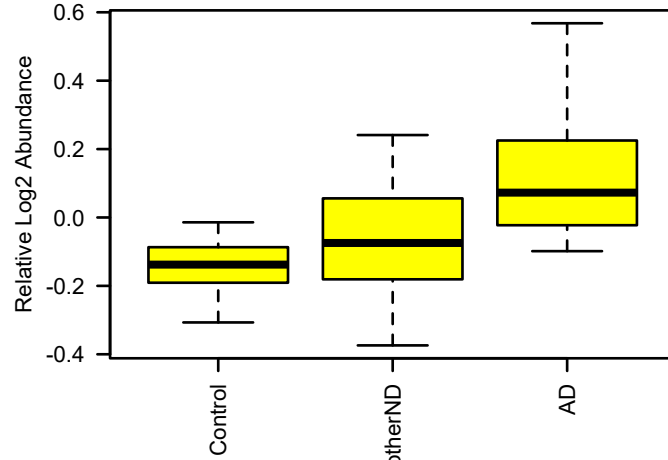

**bicor=0.36, p=0.00072**  
**cor=0.31, p=0.0041**

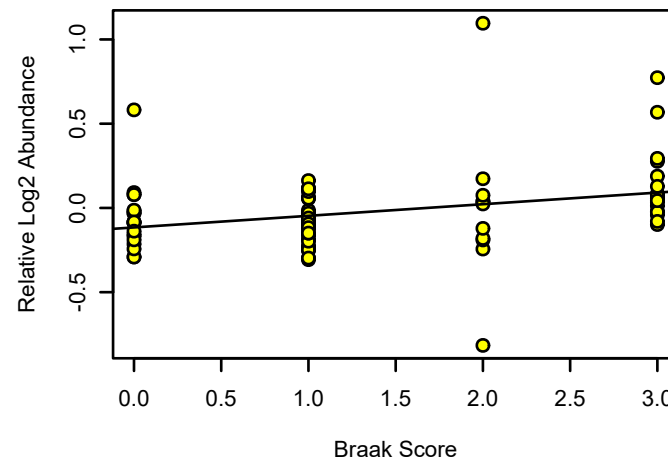

**bicor=0.37, p=0.00016**  
**cor=0.33, p=8e-04**

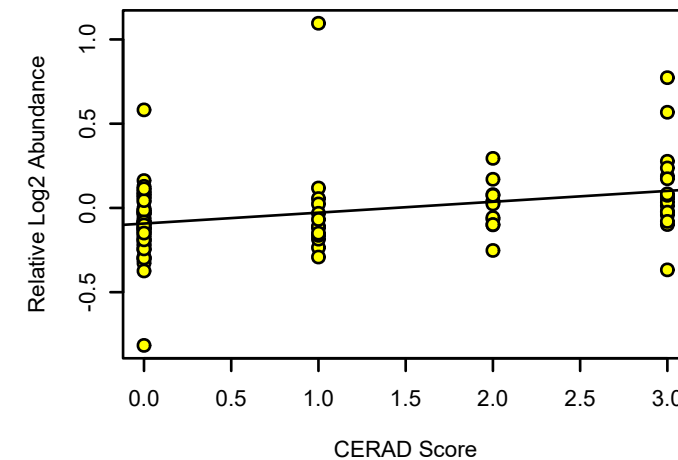

**RAB3D UPenn Mixed PRM**  
M1 turquoise MEGA module member  
K-W ANOVA p: 0.0072

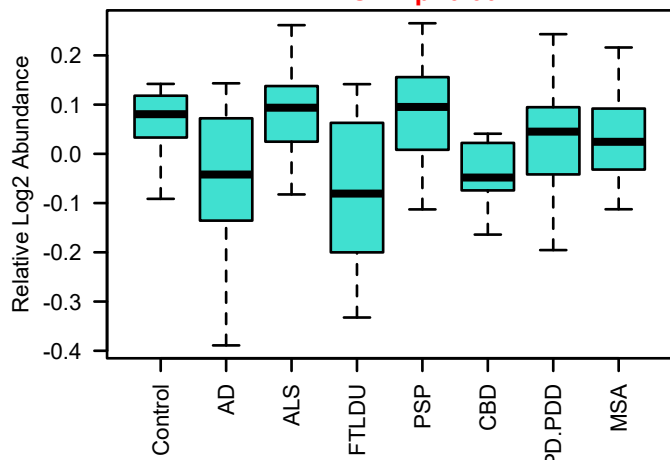

**RAB3D UPenn Mixed PRM**  
K-W ANOVA p: 0.018

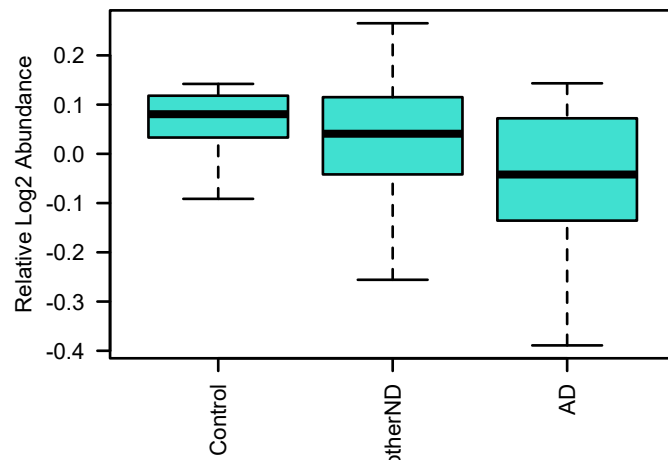

**bicor=-0.25, p=0.023**  
**cor=-0.23, p=0.035**

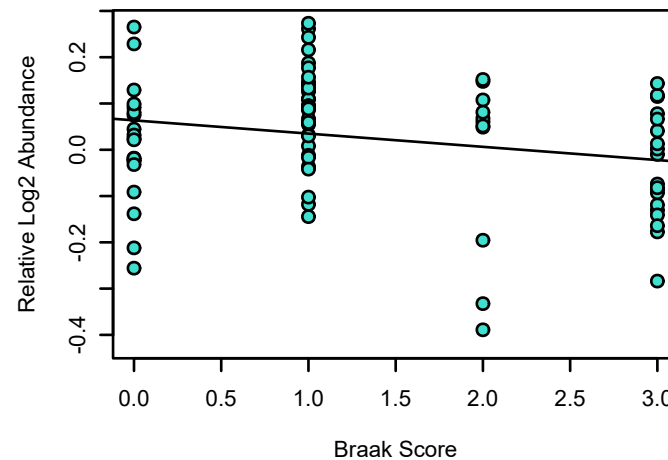

**bicor=-0.14, p=0.15**  
**cor=-0.16, p=0.11**

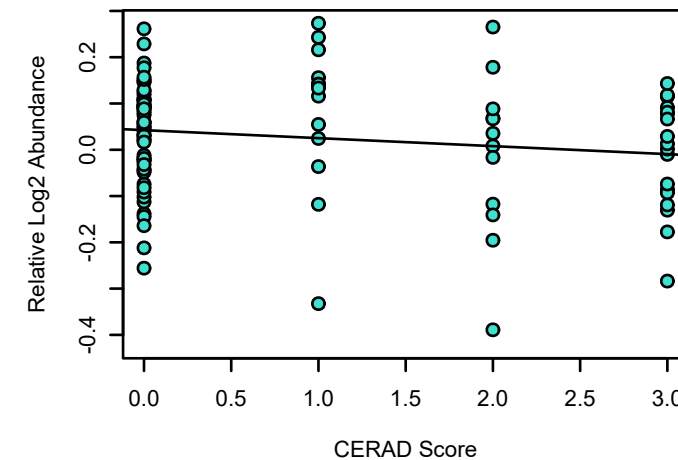

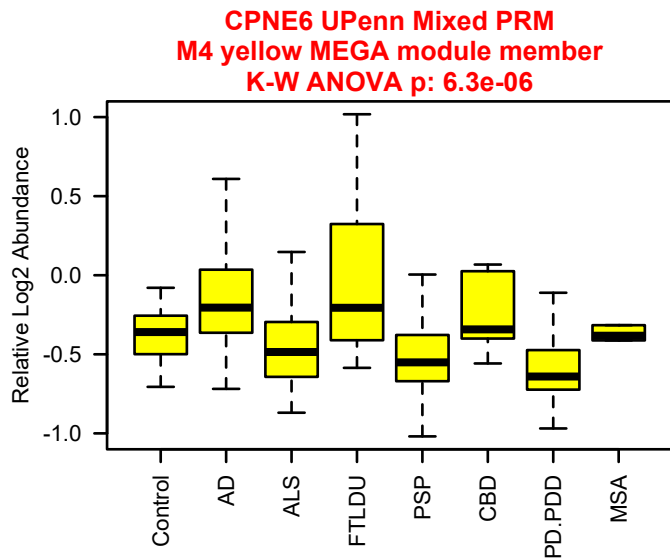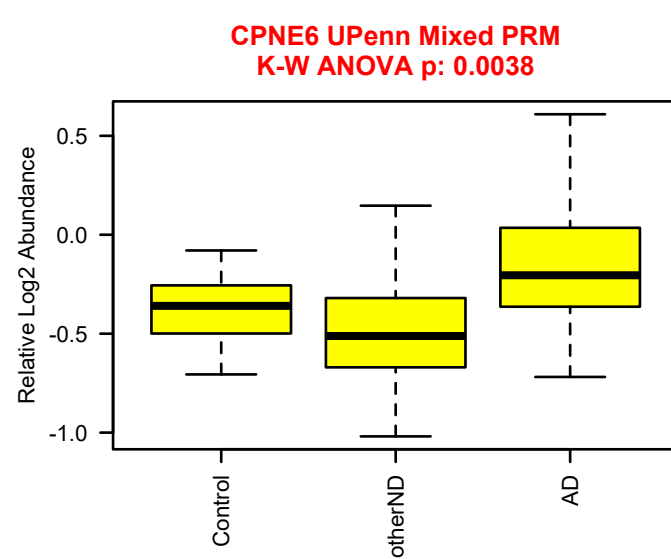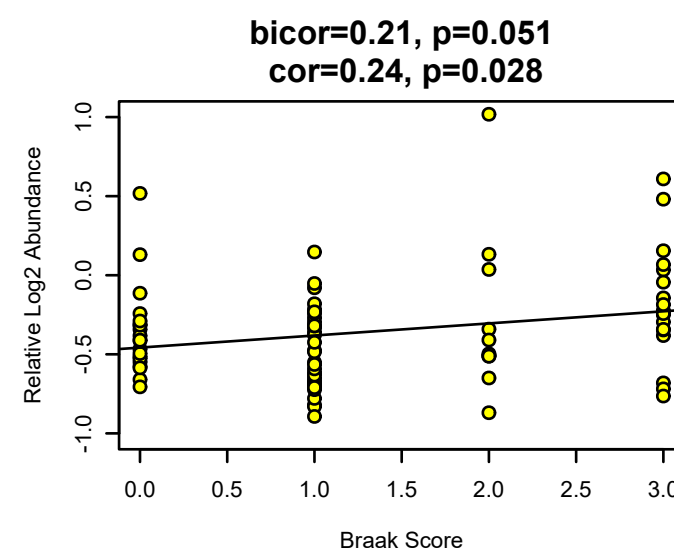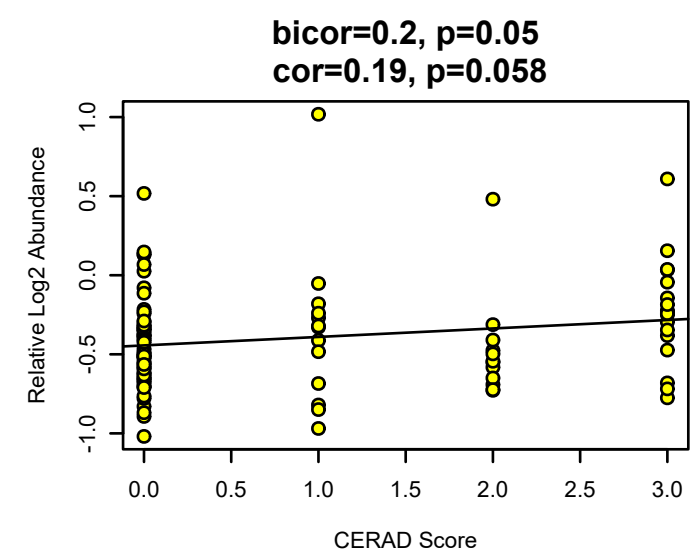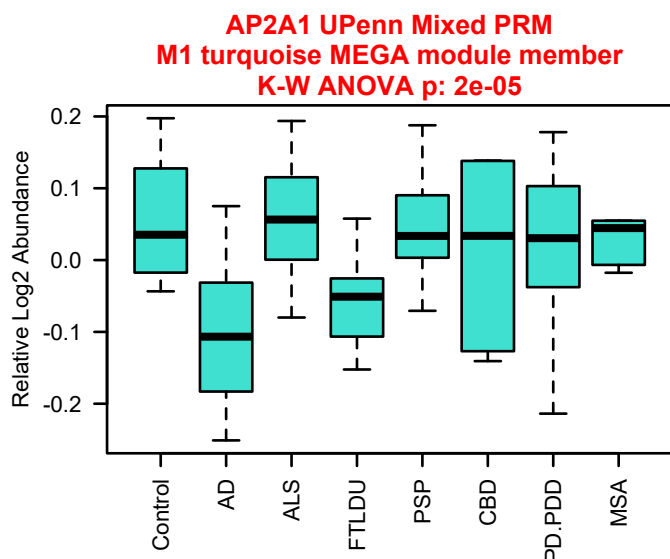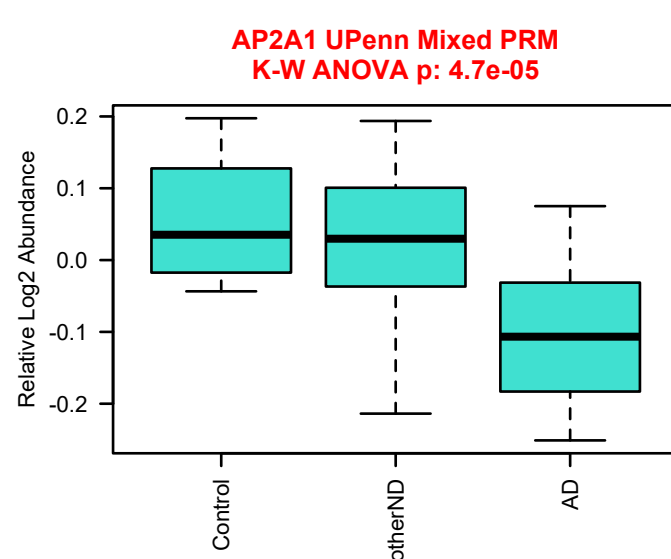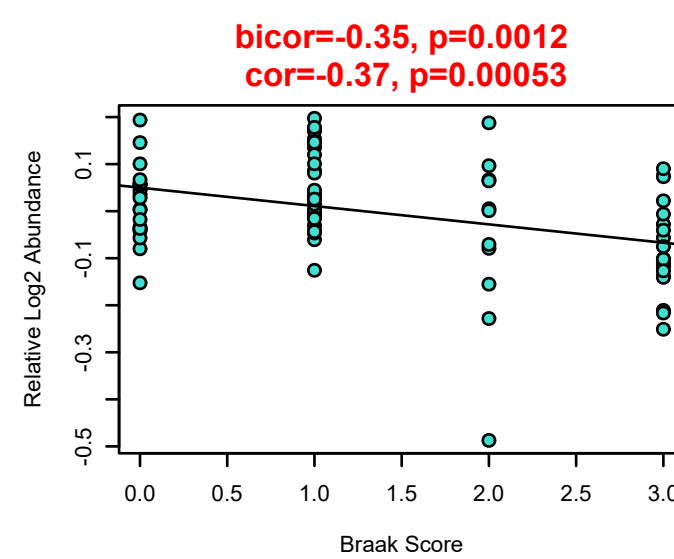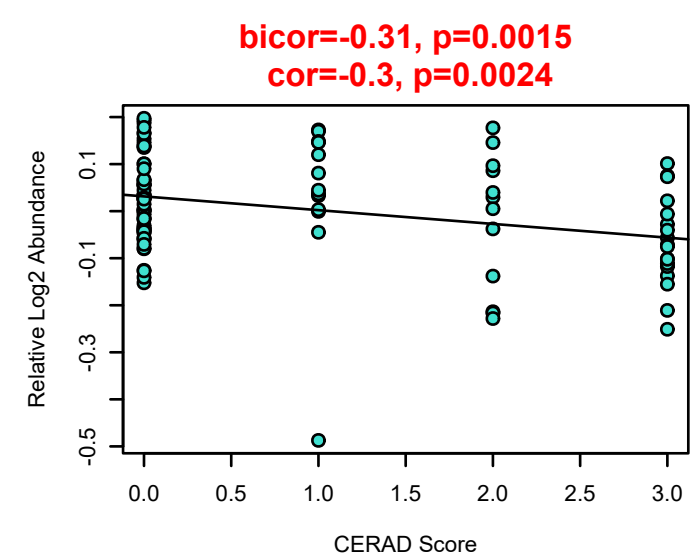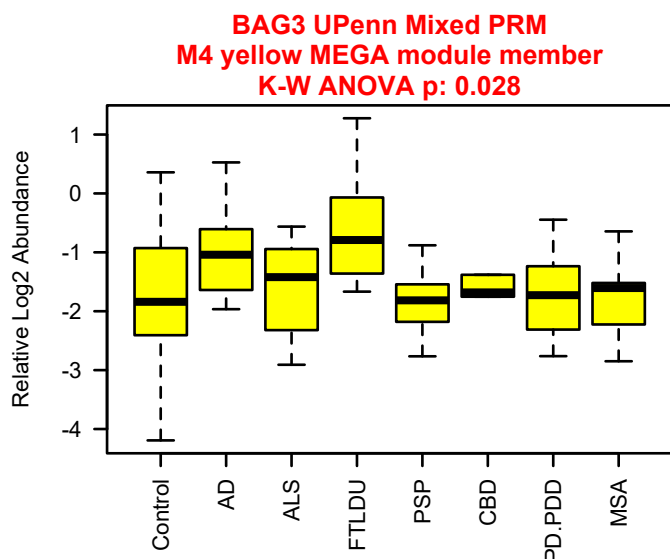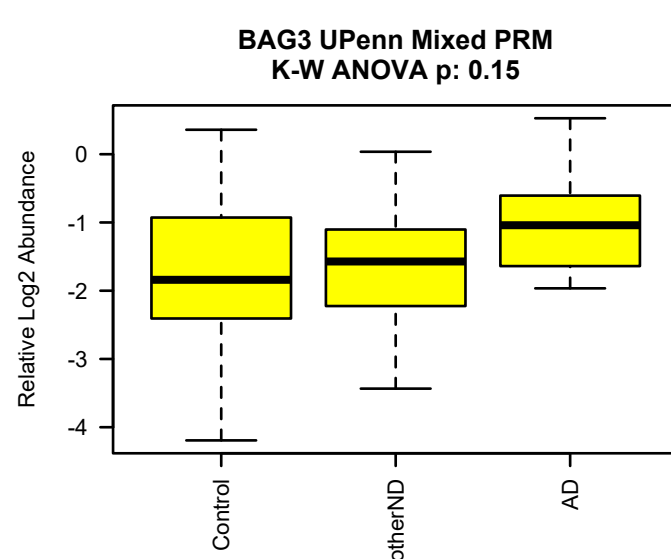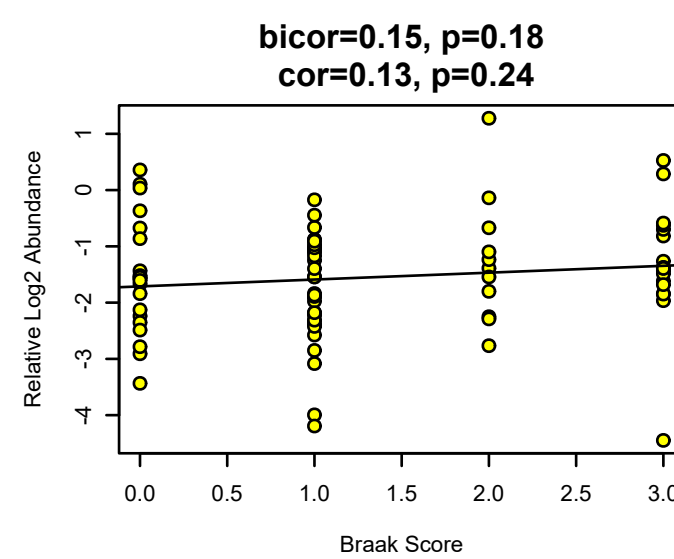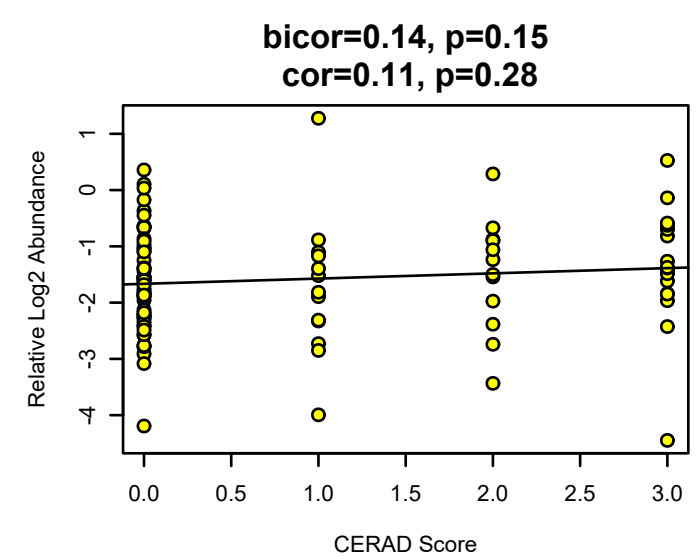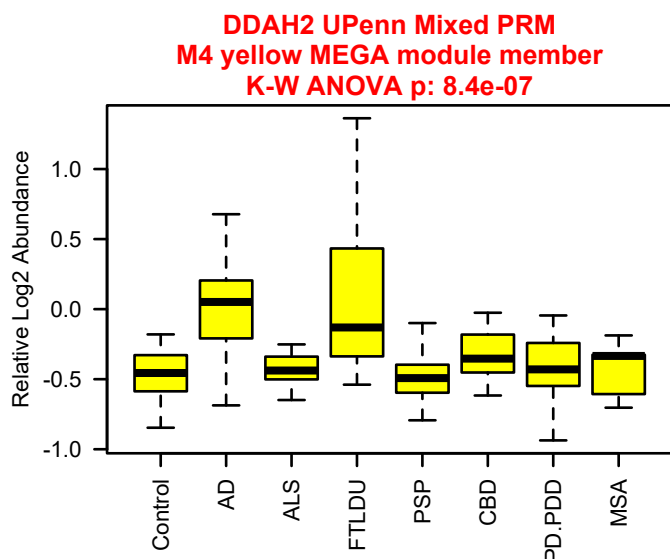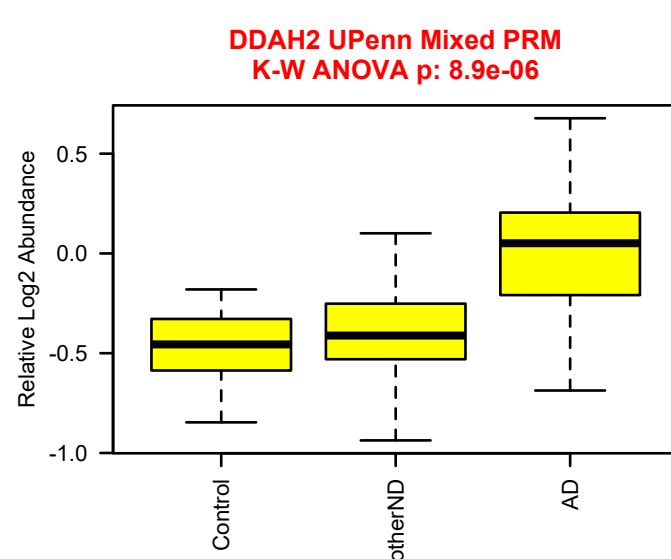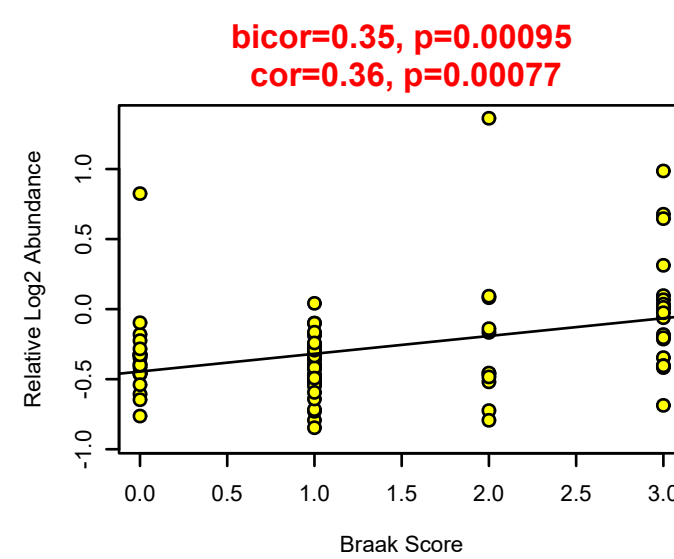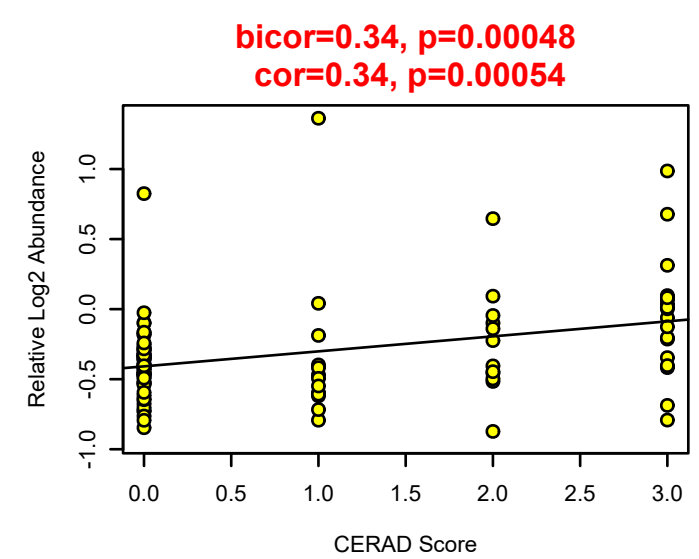

**AK1 UPenn Mixed PRM**  
M4 yellow MEGA module member  
K-W ANOVA p: 0.0049

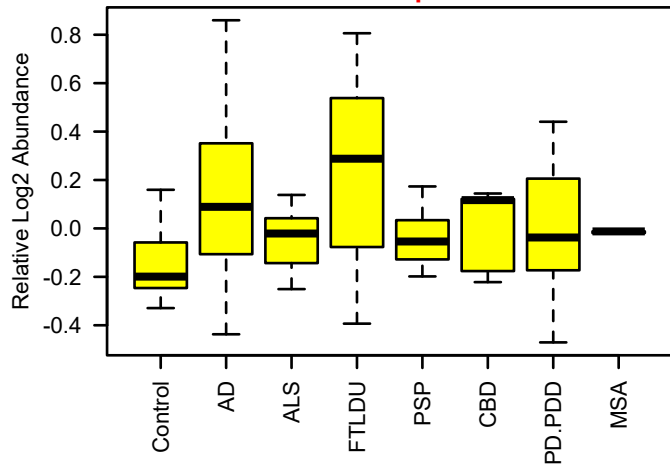

**AK1 UPenn Mixed PRM**  
K-W ANOVA p: 0.0014

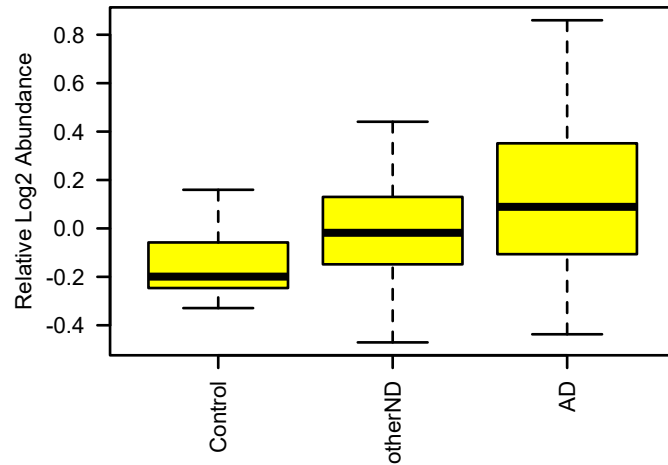

**bicor=0.27, p=0.015**  
**cor=0.28, p=0.0099**

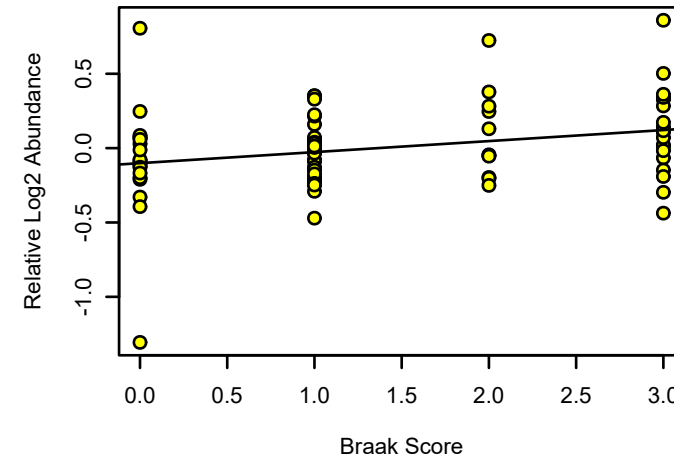

**bicor=0.19, p=0.057**  
**cor=0.22, p=0.028**

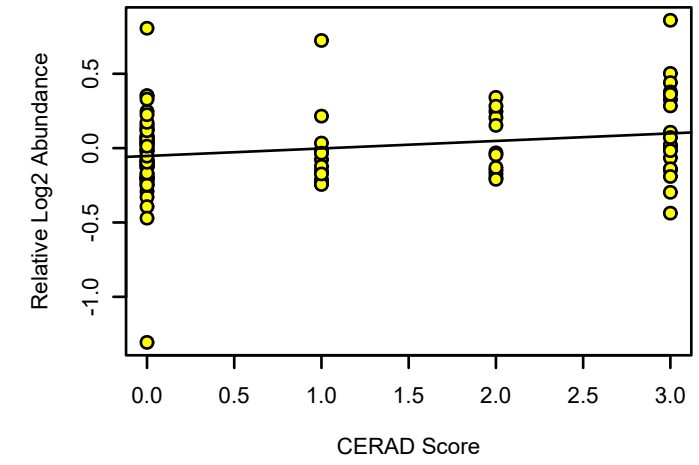

**LMNA UPenn Mixed PRM**  
M4 yellow MEGA module member  
K-W ANOVA p: 7.1e-06

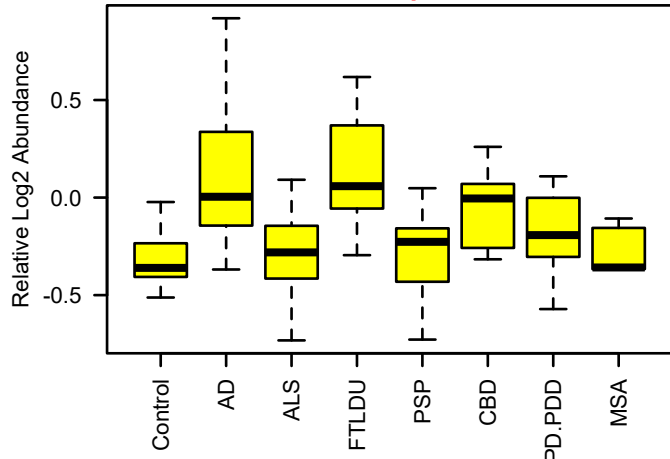

**LMNA UPenn Mixed PRM**  
K-W ANOVA p: 0.00021

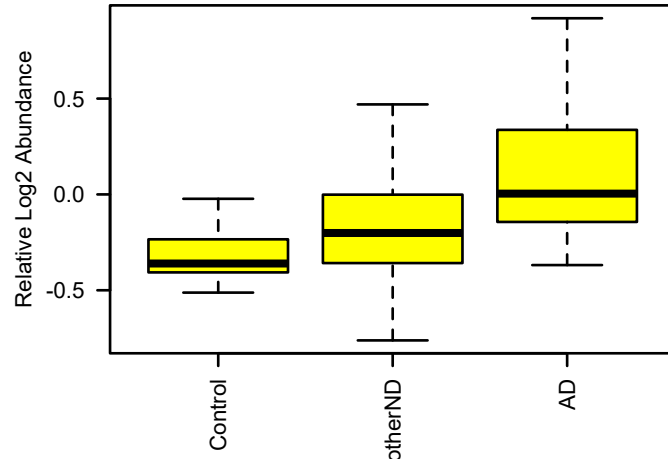

**bicor=0.34, p=0.0013**  
**cor=0.36, p=0.00077**

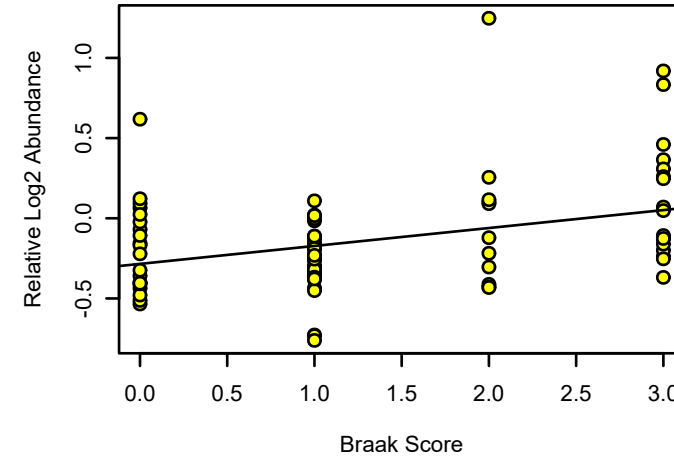

**bicor=0.25, p=0.011**  
**cor=0.28, p=0.0048**

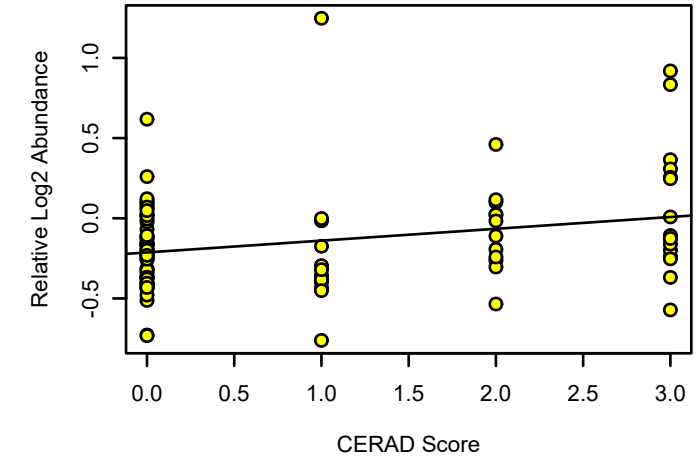

**CSTB UPenn Mixed PRM**  
M4 yellow MEGA module member  
K-W ANOVA p: 8e-08

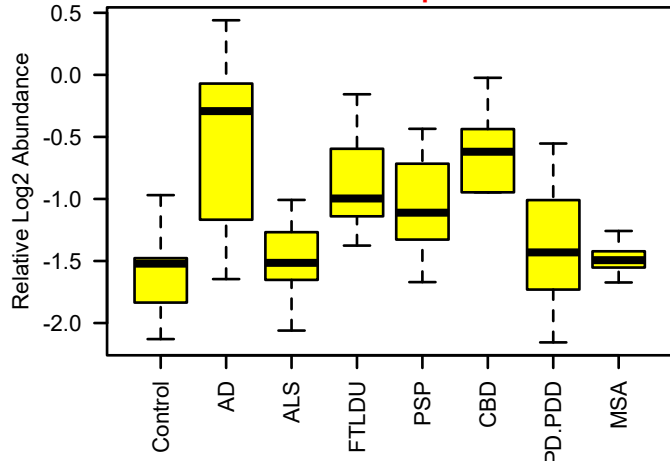

**CSTB UPenn Mixed PRM**  
K-W ANOVA p: 7.8e-08

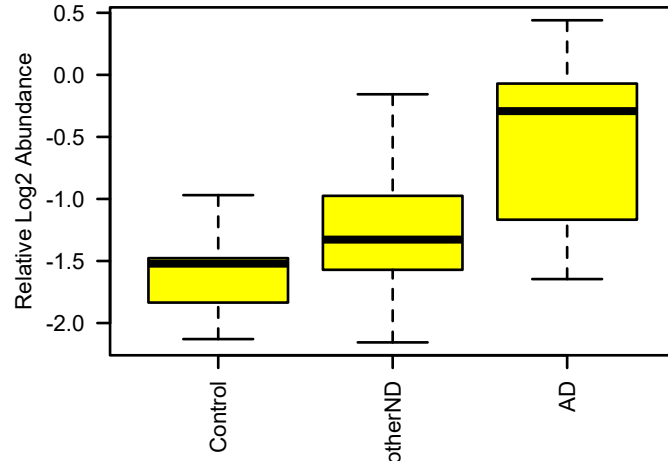

**bicor=0.43, p=5.4e-05**  
**cor=0.42, p=7e-05**

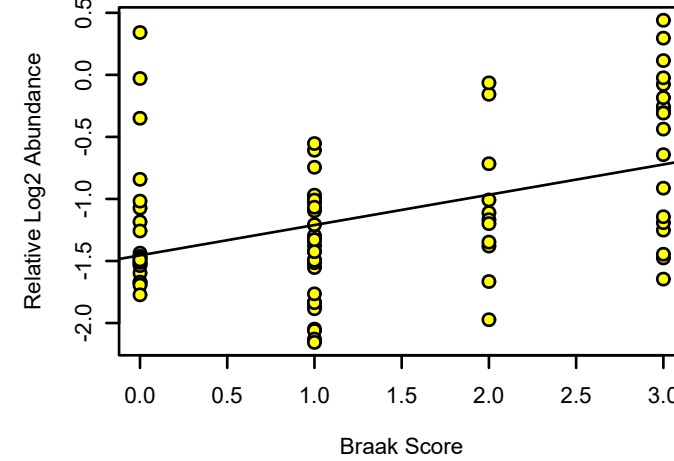

**bicor=0.29, p=0.0032**  
**cor=0.33, p=8e-04**

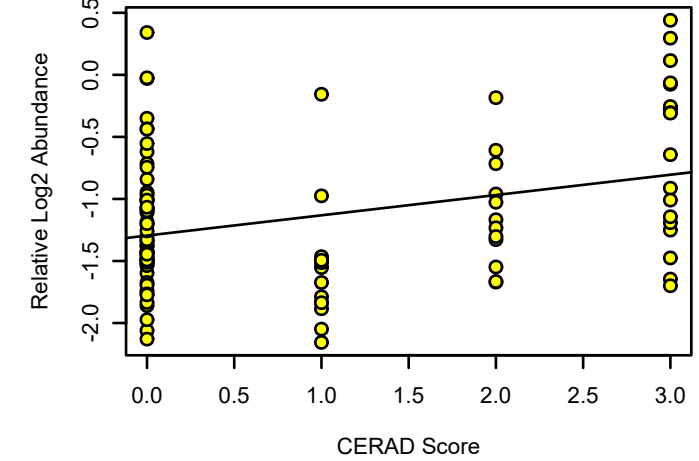

**ANXA1 UPenn Mixed PRM**  
M5 green MEGA module member  
K-W ANOVA p: 6.6e-05

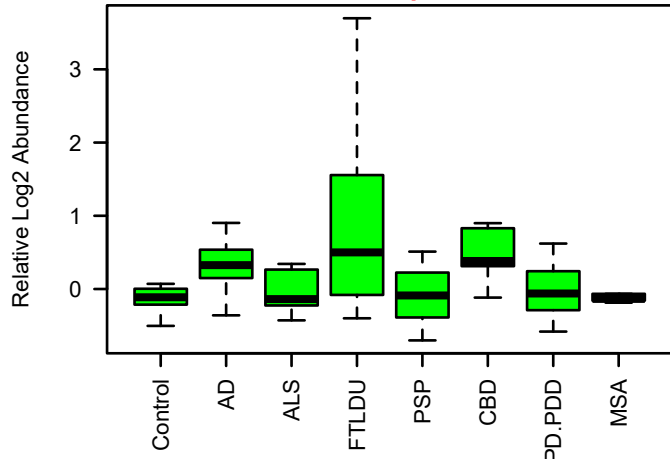

**ANXA1 UPenn Mixed PRM**  
K-W ANOVA p: 0.017

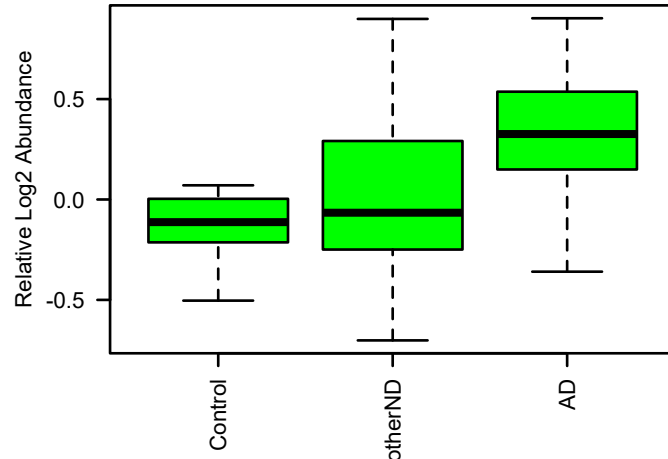

**bicor=0.46, p=9.3e-06**  
**cor=0.32, p=0.003**

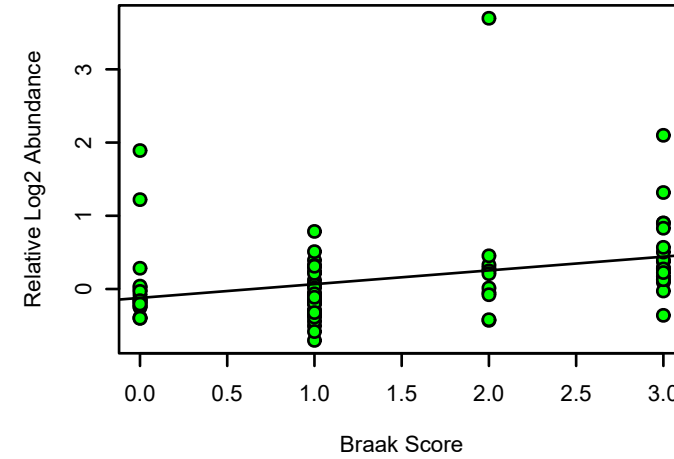

**bicor=0.34, p=5e-04**  
**cor=0.24, p=0.016**

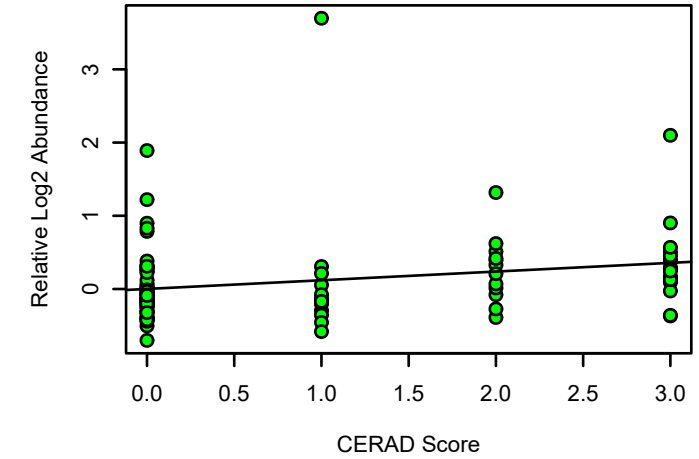

**CAPNS2 UPenn Mixed PRM**  
NA grey20 MEGA module member  
K-W ANOVA p: 5.4e-06

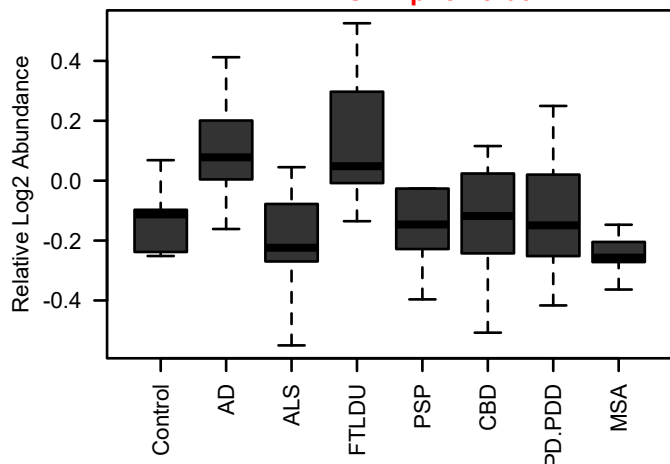

**CAPNS2 UPenn Mixed PRM**  
K-W ANOVA p: 0.00012

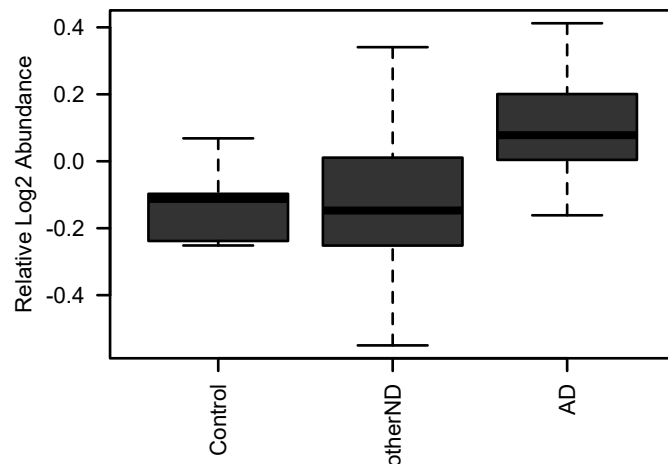

**bicor=0.4, p=0.00013**  
**cor=0.37, p=0.00053**

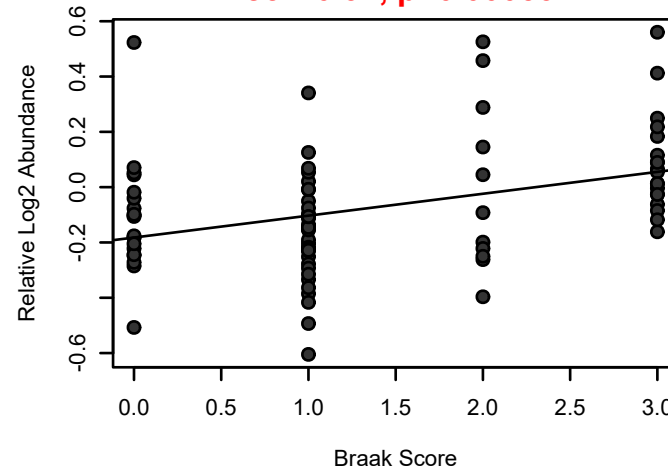

**bicor=0.36, p=0.00025**  
**cor=0.33, p=8e-04**

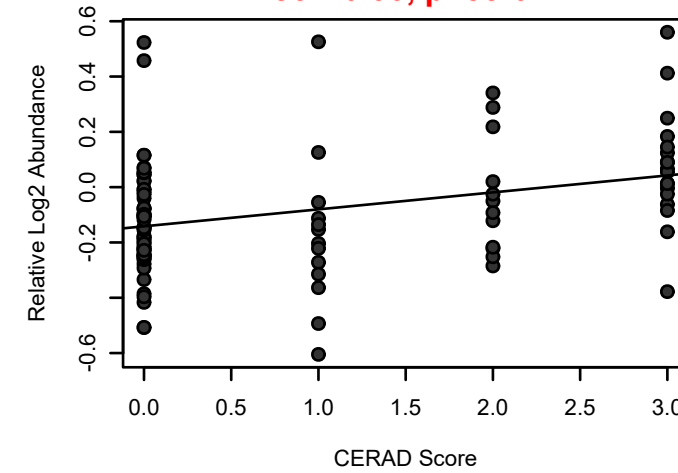

**CAPNS1 UPenn Mixed PRM**  
M4 yellow MEGA module member  
K-W ANOVA p: 0.00012

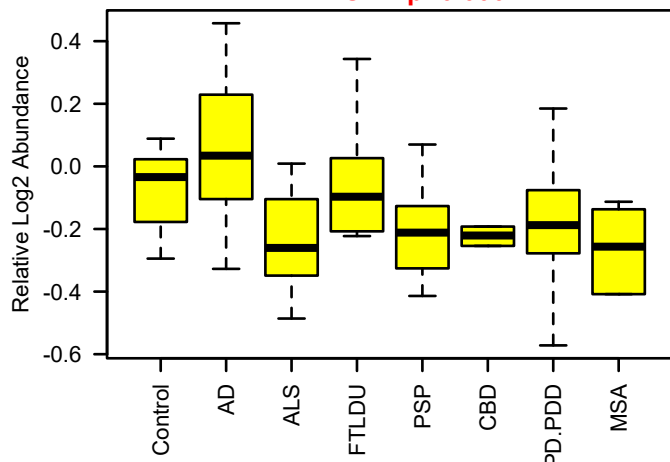

**CAPNS1 UPenn Mixed PRM**  
K-W ANOVA p: 5.7e-06

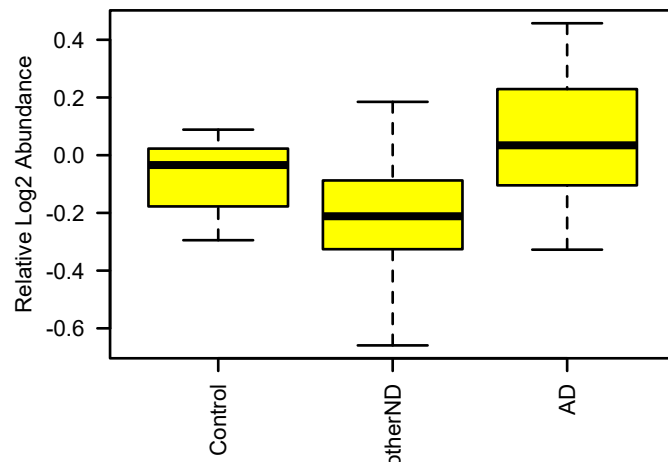

**bicor=0.24, p=0.028**  
**cor=0.27, p=0.013**

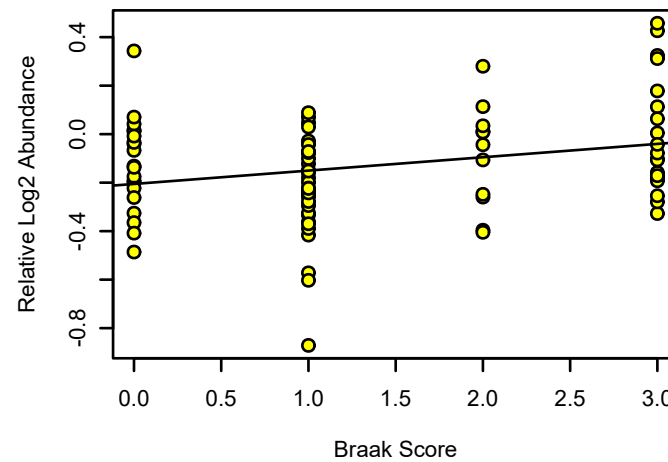

**bicor=0.25, p=0.013**  
**cor=0.27, p=0.0066**

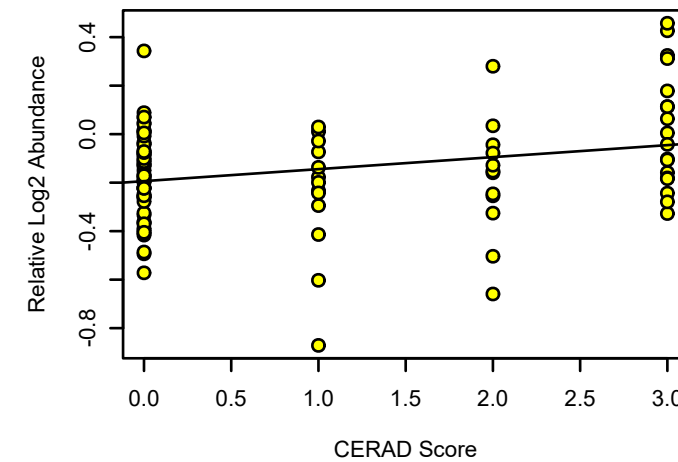

**HSPB1 UPenn Mixed PRM**  
M4 yellow MEGA module member  
K-W ANOVA p: 0.00018

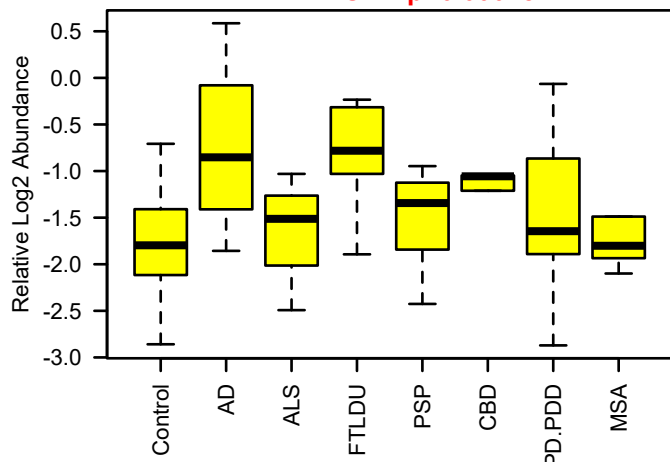

**HSPB1 UPenn Mixed PRM**  
K-W ANOVA p: 3e-04

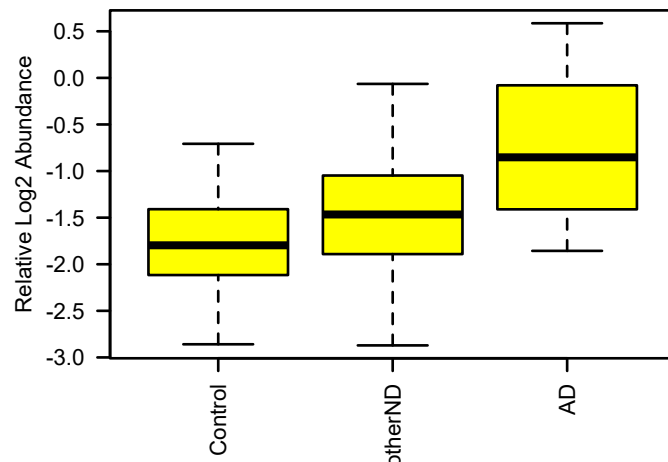

**bicor=0.39, p=0.00024**  
**cor=0.41, p=0.00011**

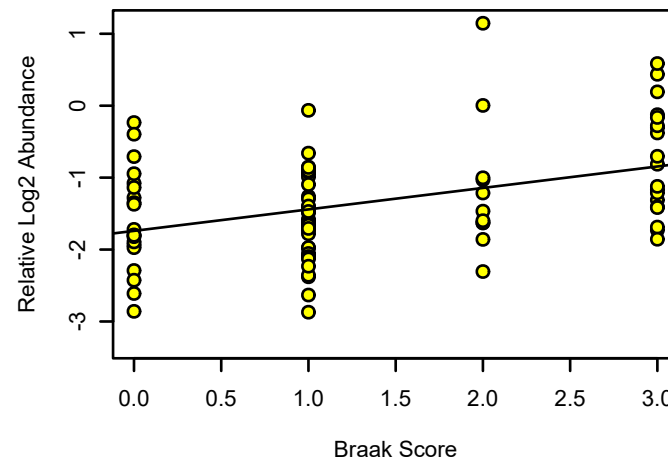

**bicor=0.29, p=0.003**  
**cor=0.3, p=0.0024**

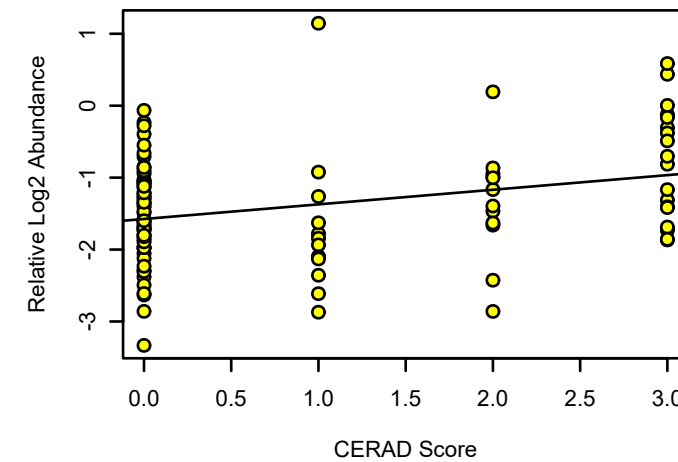

**ITGB1 UPenn Mixed PRM**  
M4 yellow MEGA module member  
K-W ANOVA p: 5.3e-06

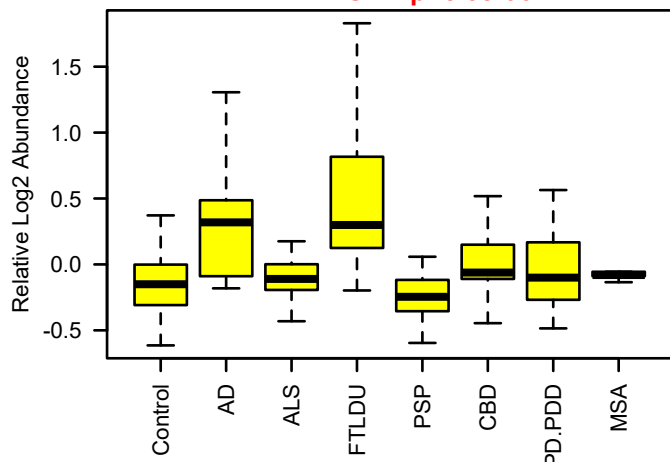

**ITGB1 UPenn Mixed PRM**  
K-W ANOVA p: 0.0011

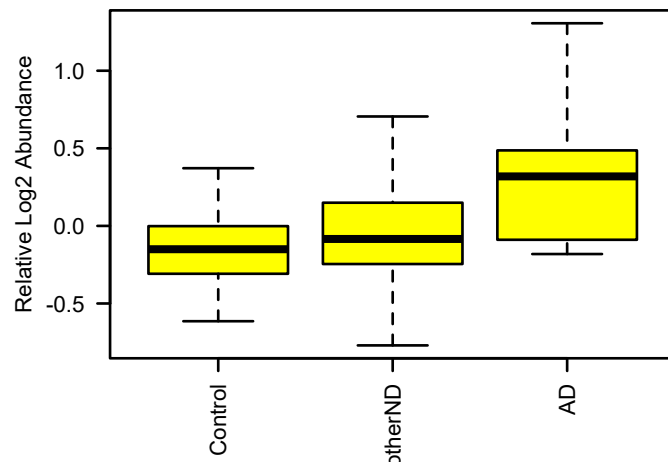

**bicor=0.34, p=0.0014**  
**cor=0.32, p=0.003**

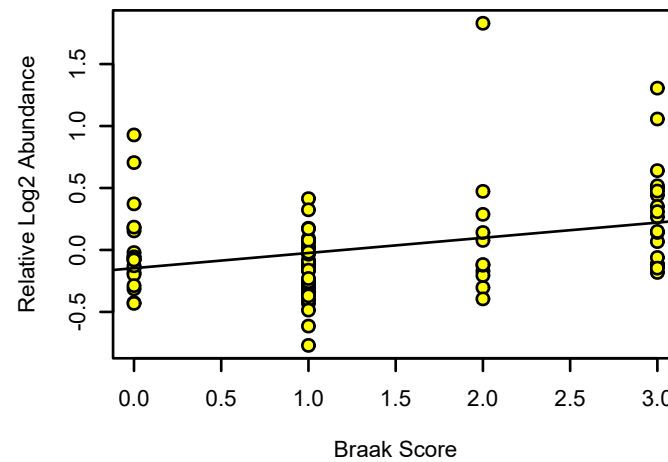

**bicor=0.31, p=0.002**  
**cor=0.29, p=0.0034**

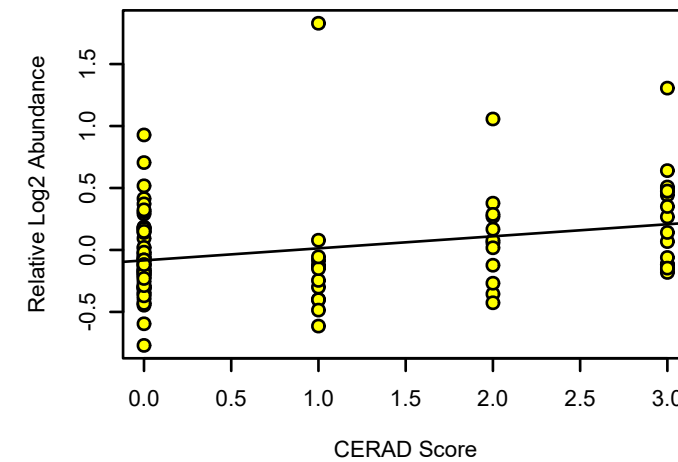

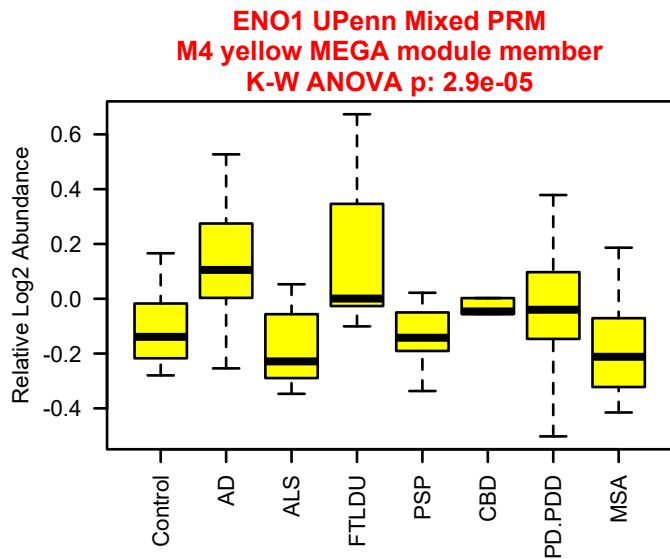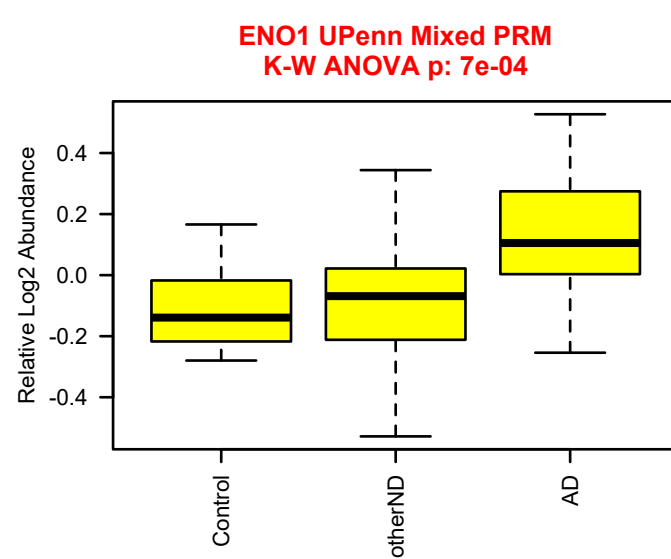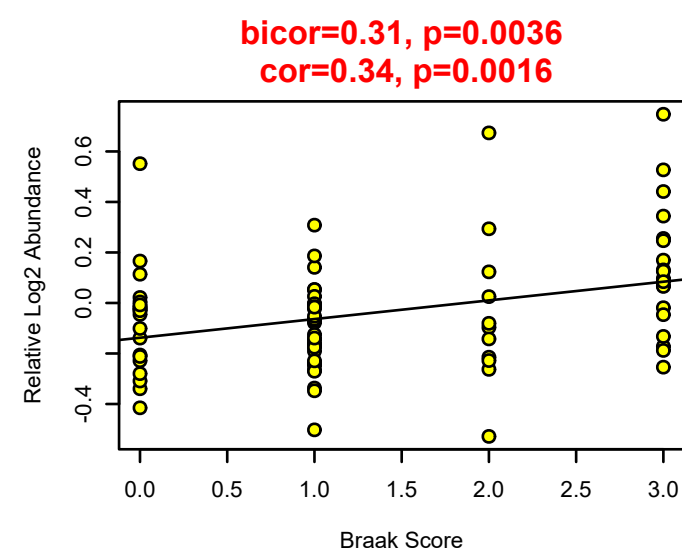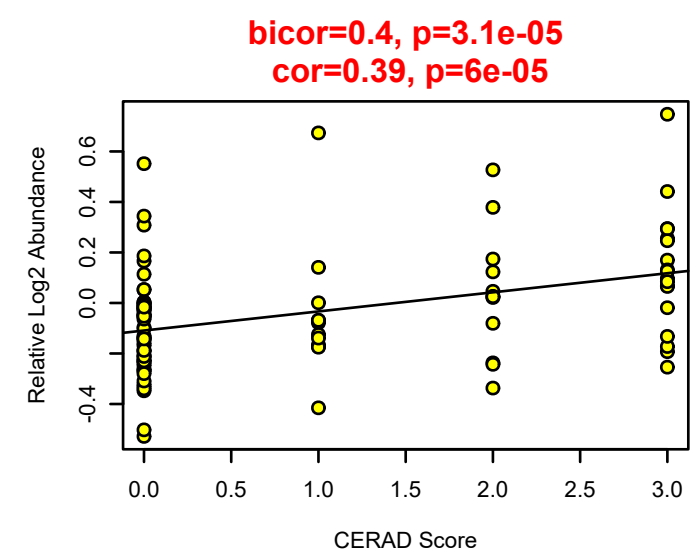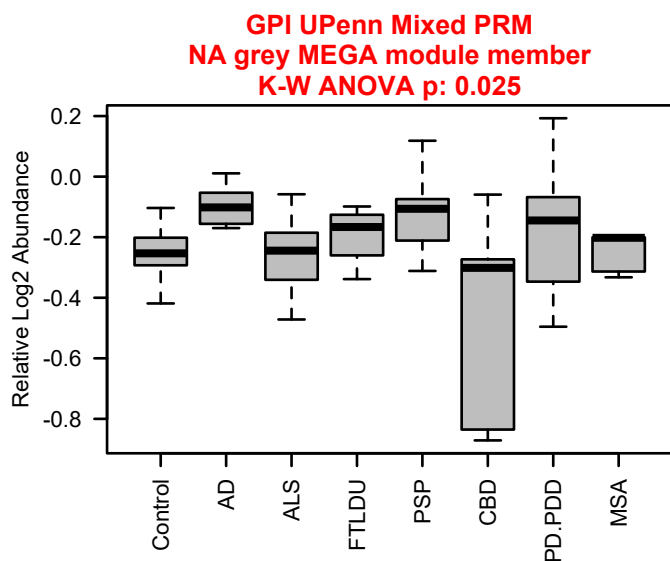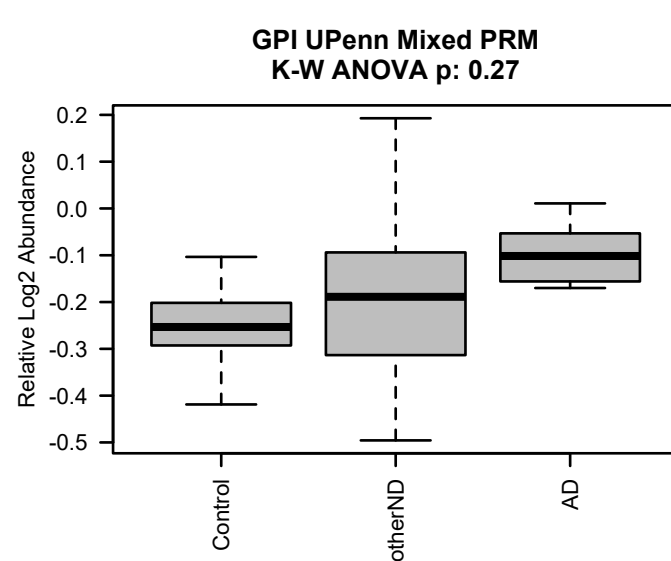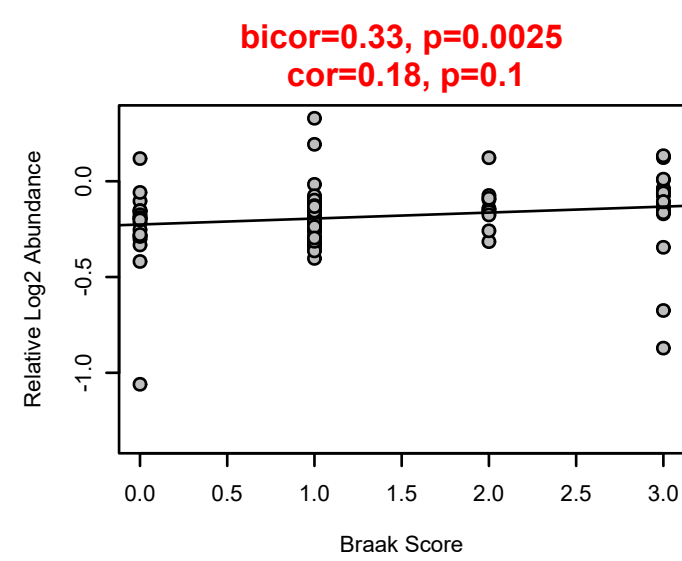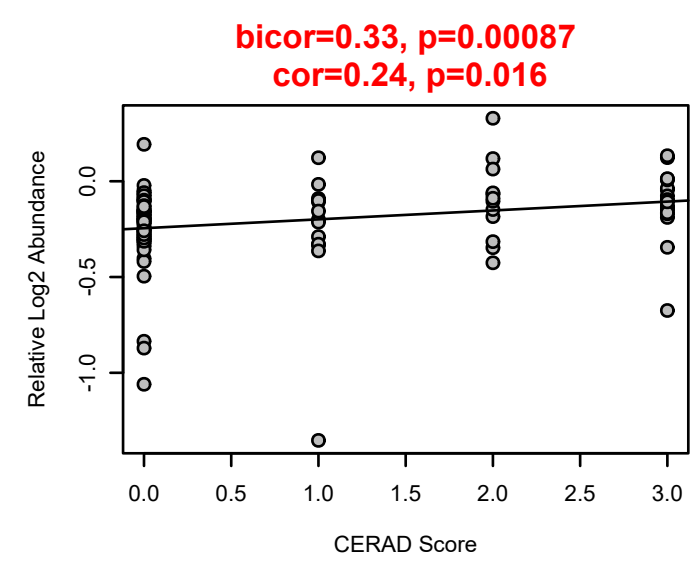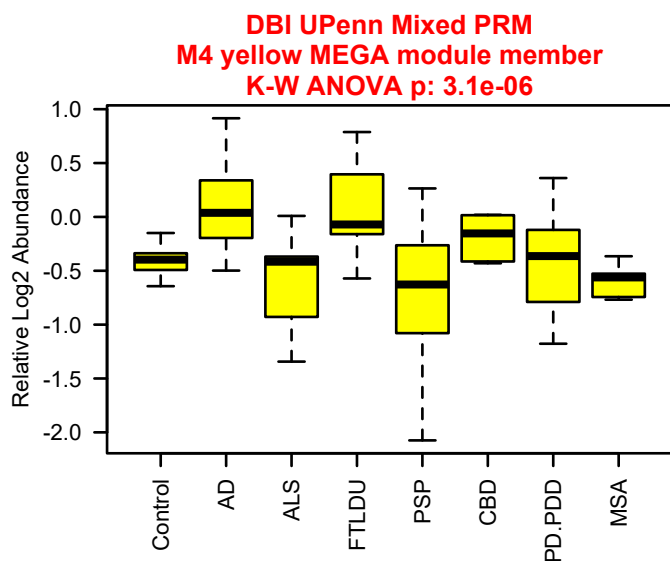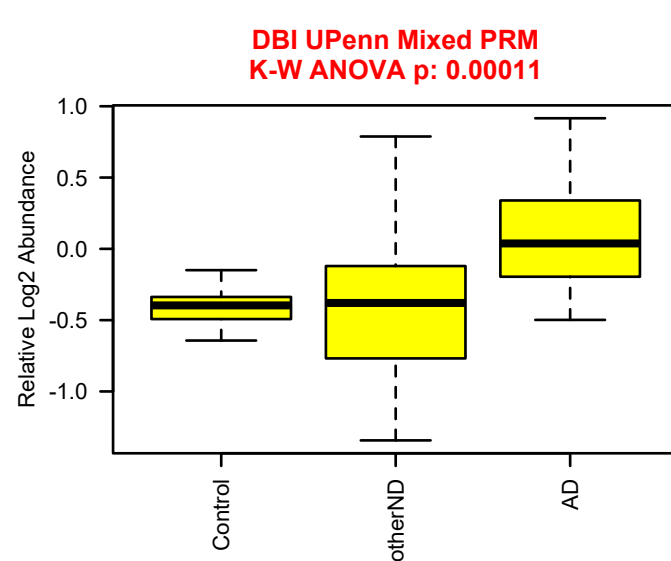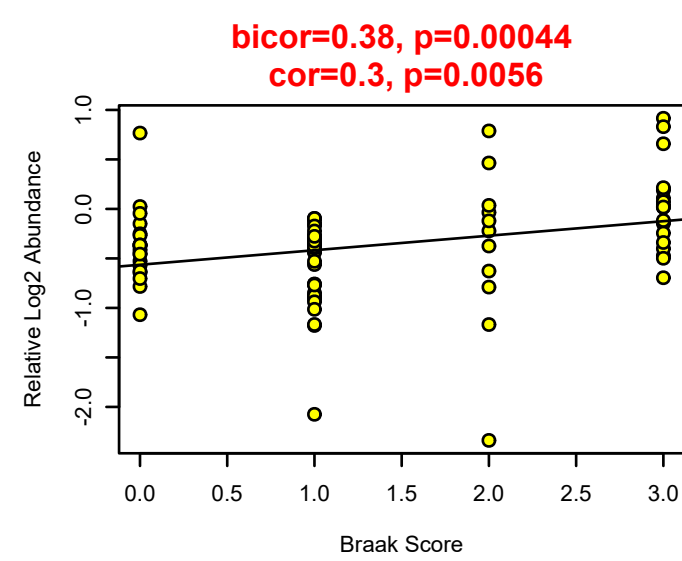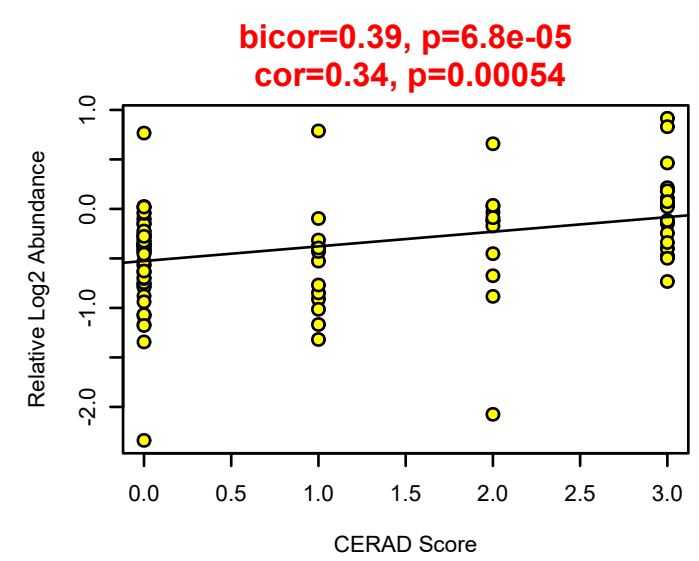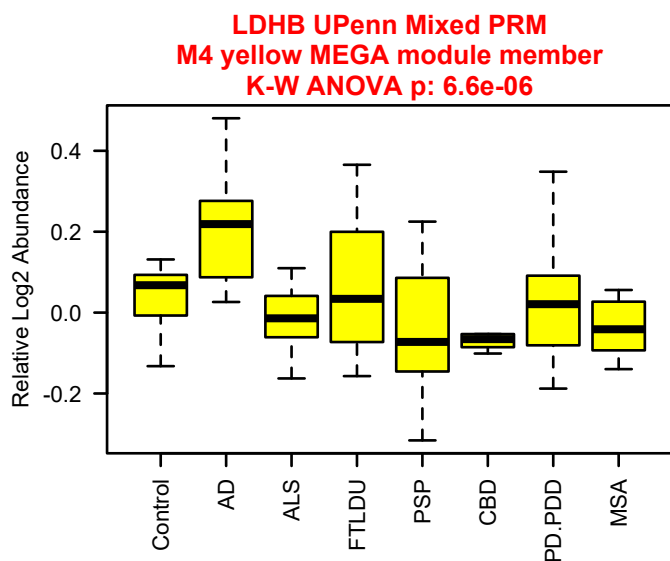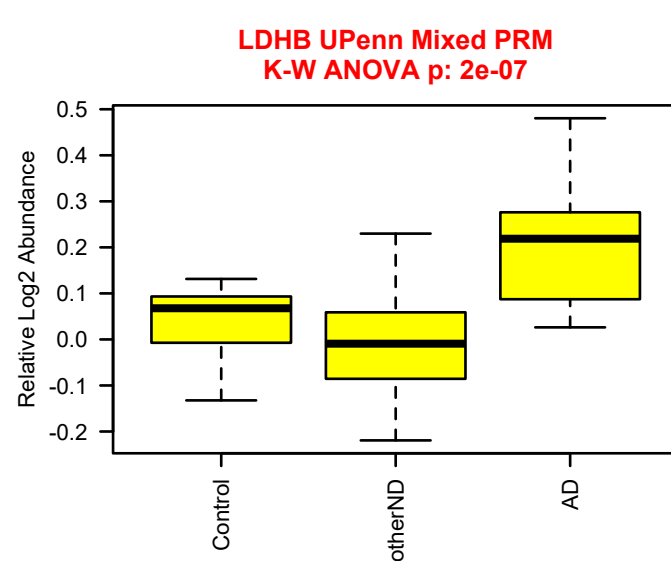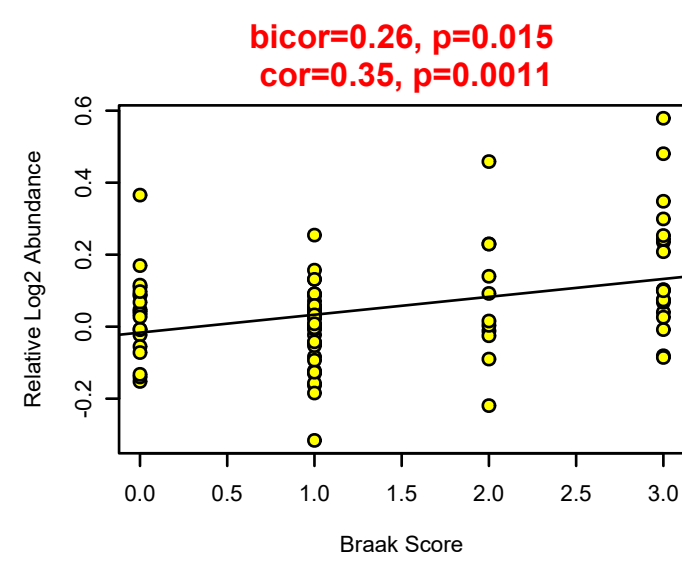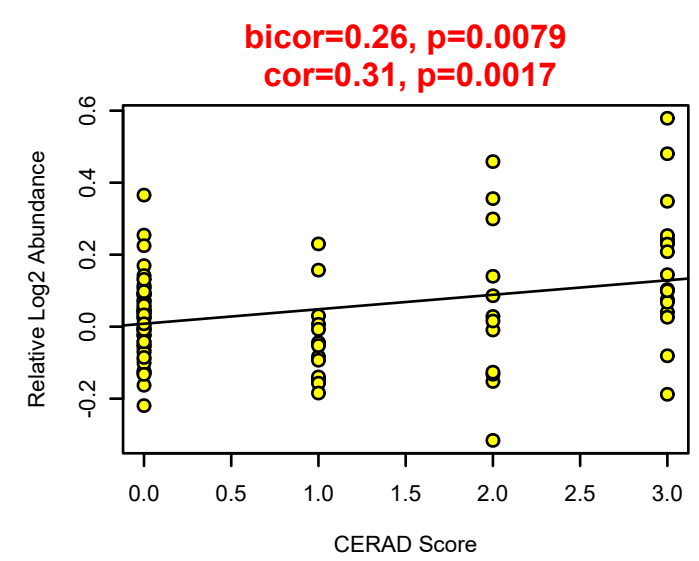

**HSP90AA1 UPenn Mixed PRM**  
**M11 greenyellow MEGA module member**  
**K-W ANOVA p: 0.031**

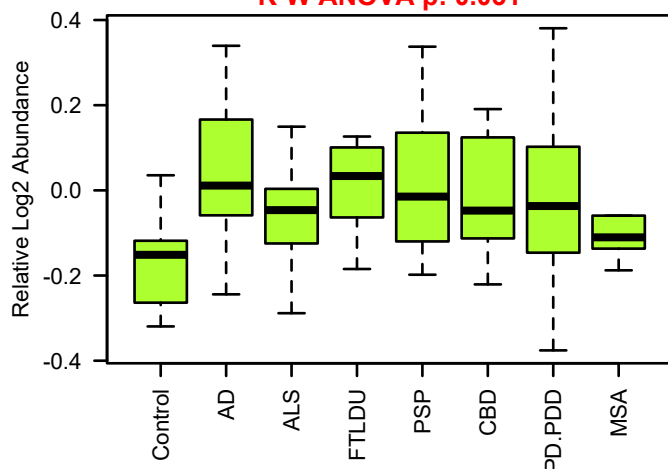

**HSP90AA1 UPenn Mixed PRM**  
**K-W ANOVA p: 0.0011**

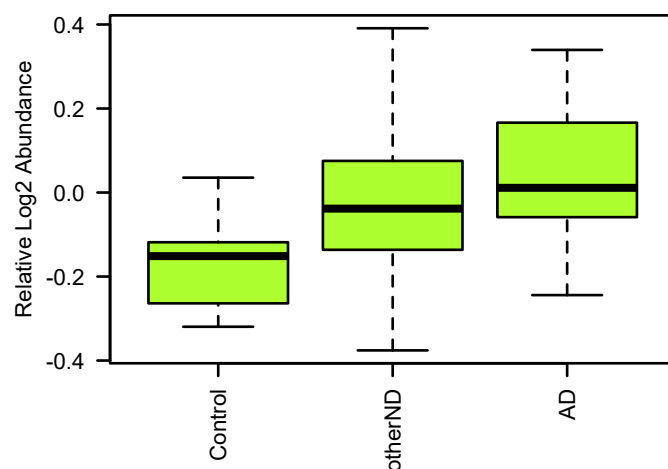

**bicor=0.3, p=0.0051**  
**cor=0.31, p=0.0041**

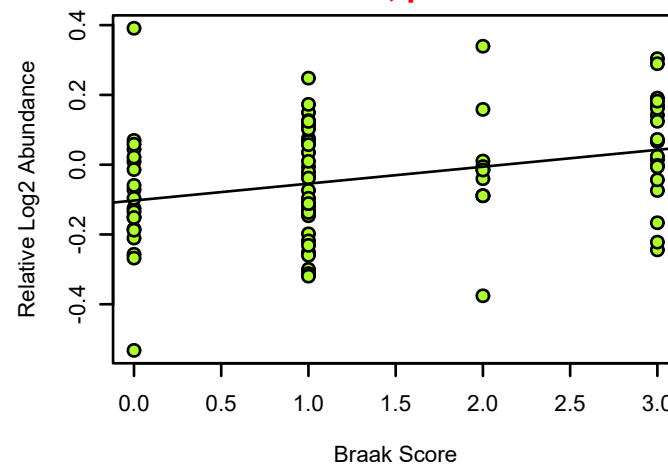

**bicor=0.0047, p=0.96**  
**cor=-0.009, p=0.93**

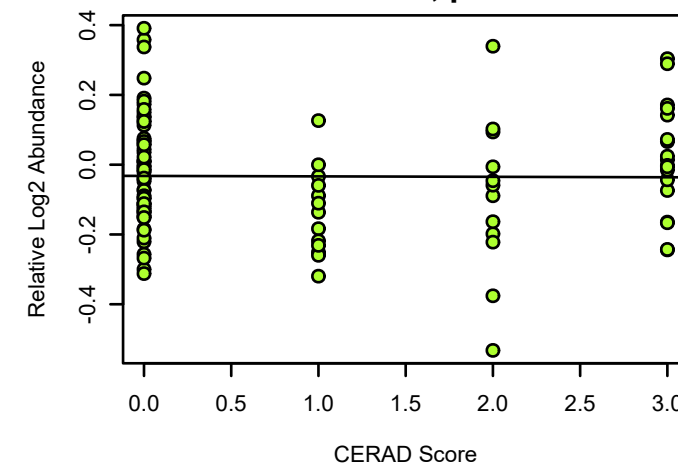

**HSP90AA2P UPenn Mixed PRM**  
**NA grey20 MEGA module member**  
**K-W ANOVA p: 0.0056**

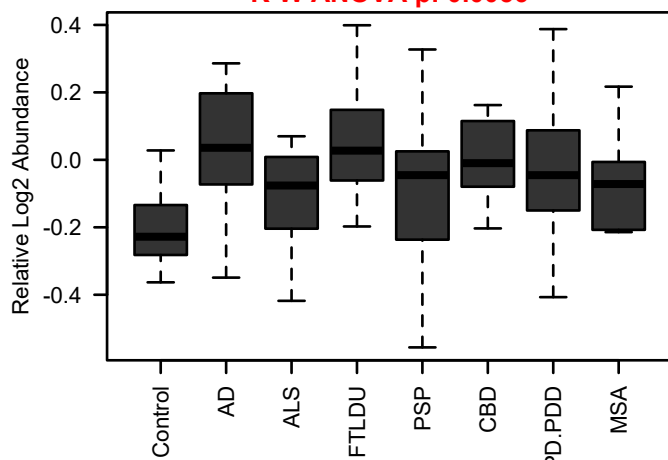

**HSP90AA2P UPenn Mixed PRM**  
**K-W ANOVA p: 0.00061**

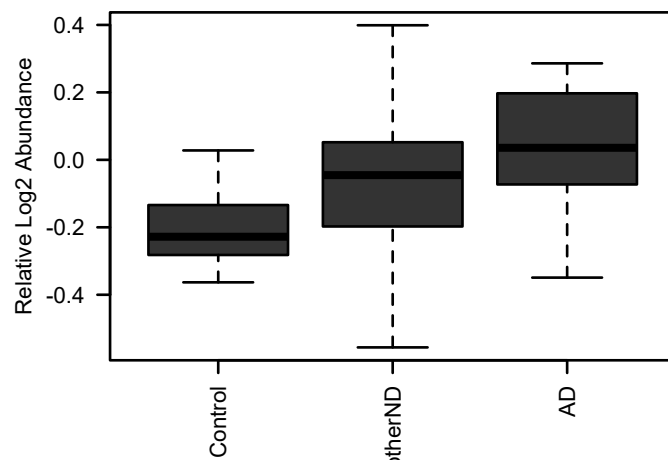

**bicor=0.28, p=0.0091**  
**cor=0.31, p=0.0041**

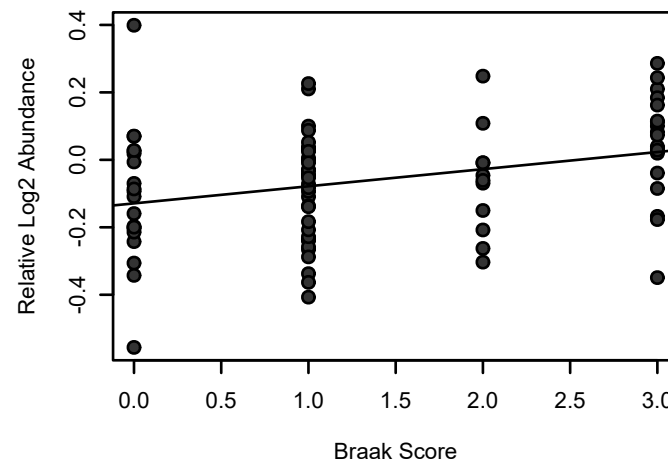

**bicor=0.12, p=0.22**  
**cor=0.11, p=0.28**

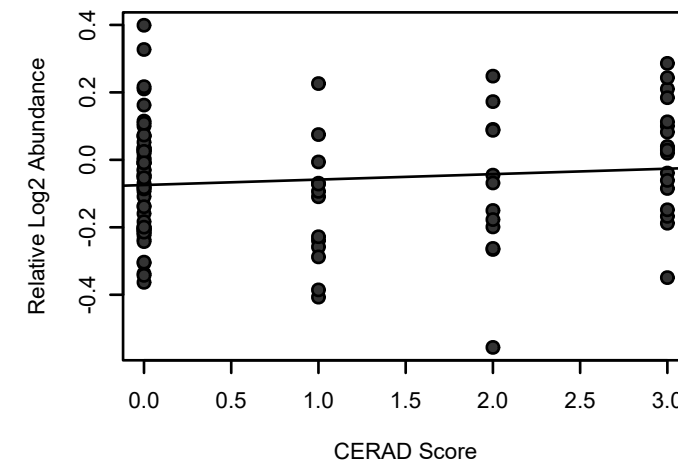

**HSP90AB2P UPenn Mixed PRM**  
**NA grey MEGA module member**  
**K-W ANOVA p: 0.22**

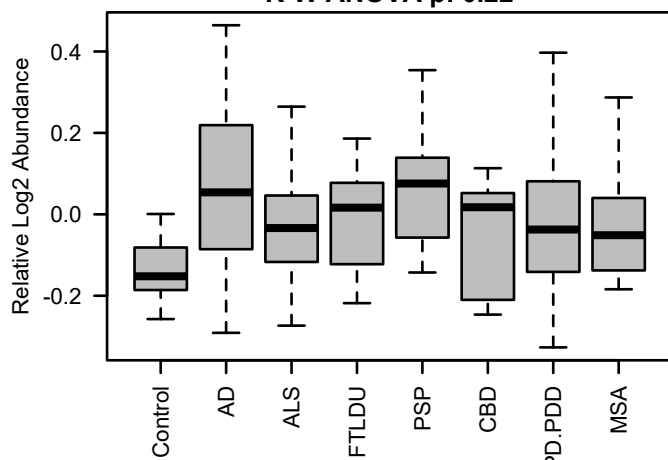

**HSP90AB2P UPenn Mixed PRM**  
**K-W ANOVA p: 0.017**

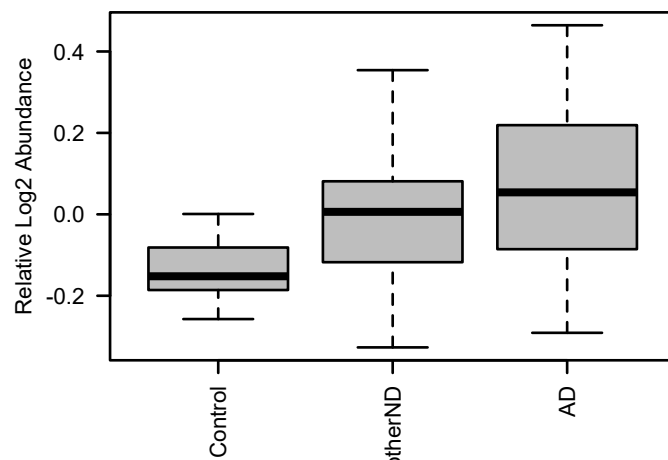

**bicor=0.19, p=0.088**  
**cor=0.23, p=0.035**

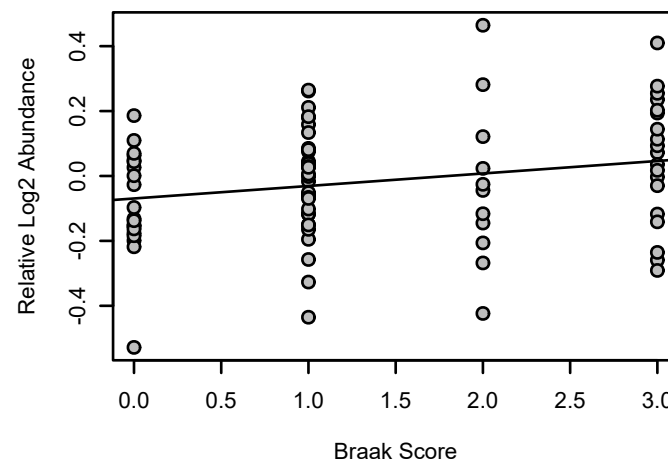

**bicor=0.0026, p=0.98**  
**cor=0.0071, p=0.94**

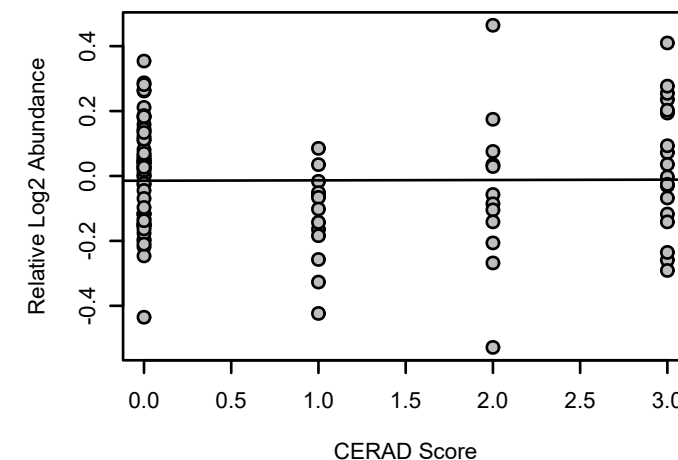

**HSP90AB1 UPenn Mixed PRM**  
**M11 greenyellow MEGA module member**  
**K-W ANOVA p: 0.57**

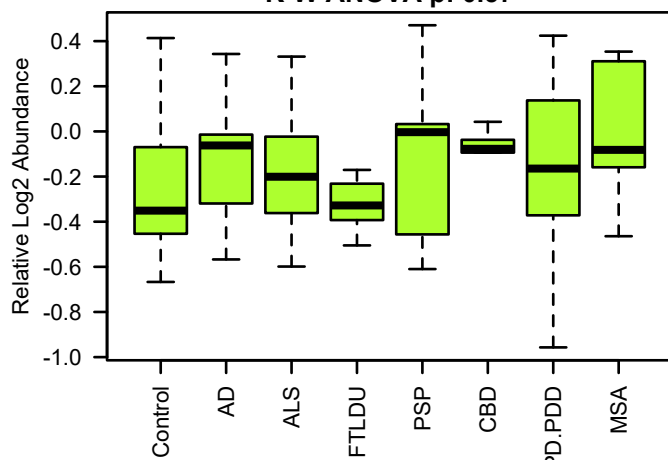

**HSP90AB1 UPenn Mixed PRM**  
**K-W ANOVA p: 0.41**

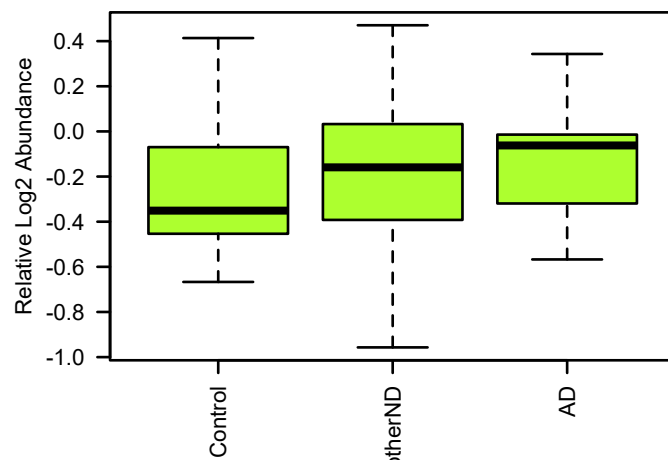

**bicor=0.14, p=0.22**  
**cor=0.13, p=0.24**

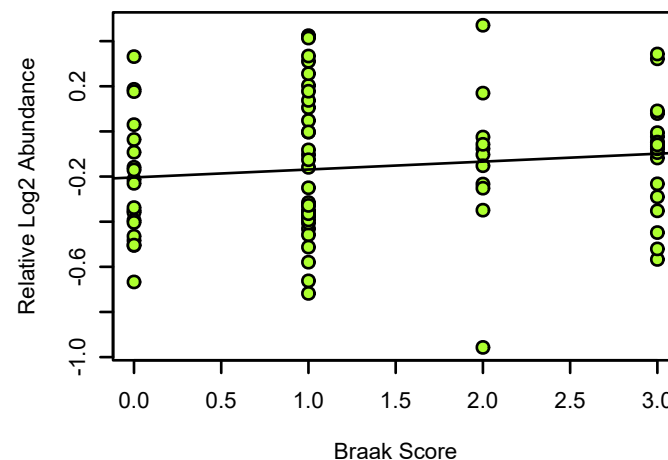

**bicor=-0.0019, p=0.99**  
**cor=-0.0089, p=0.93**

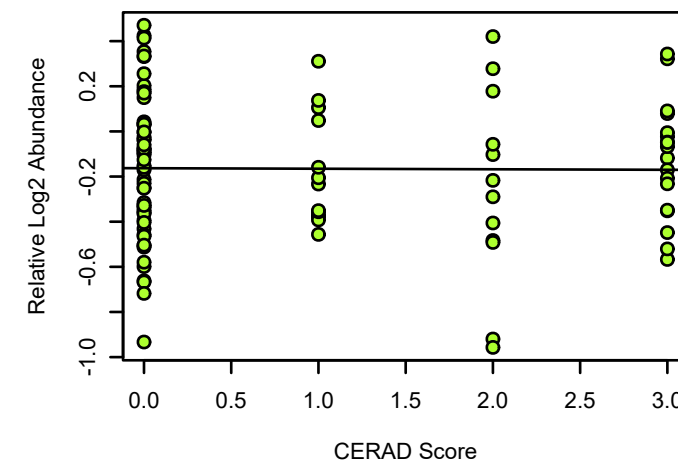



**HSP90AB3P UPenn Mixed PRM**  
**NA grey20 MEGA module member**  
**K-W ANOVA p: 0.0018**

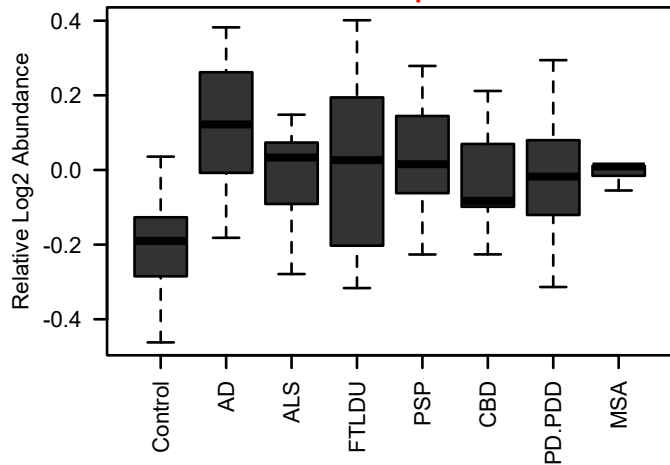

**HSP90AB3P UPenn Mixed PRM**  
**K-W ANOVA p: 1.8e-05**

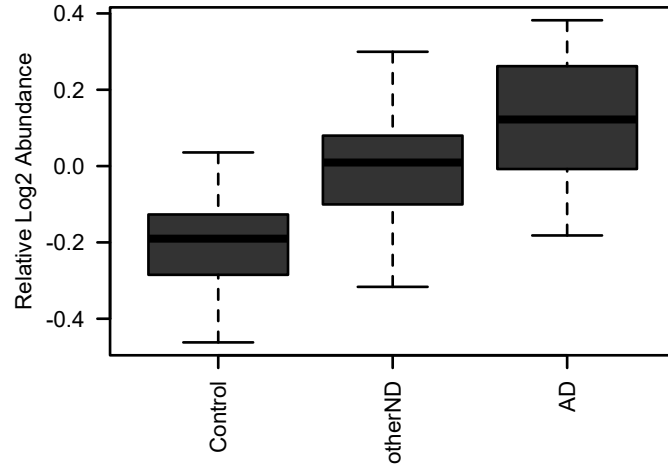

**bicor=0.33, p=0.0019**  
**cor=0.38, p=0.00036**

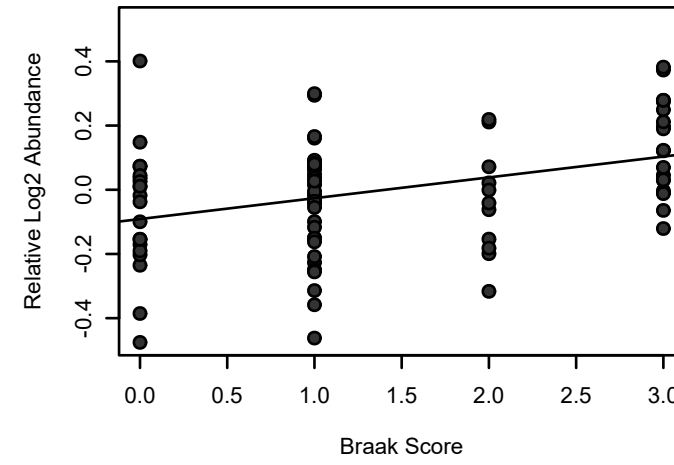

**bicor=0.087, p=0.39**  
**cor=0.078, p=0.44**

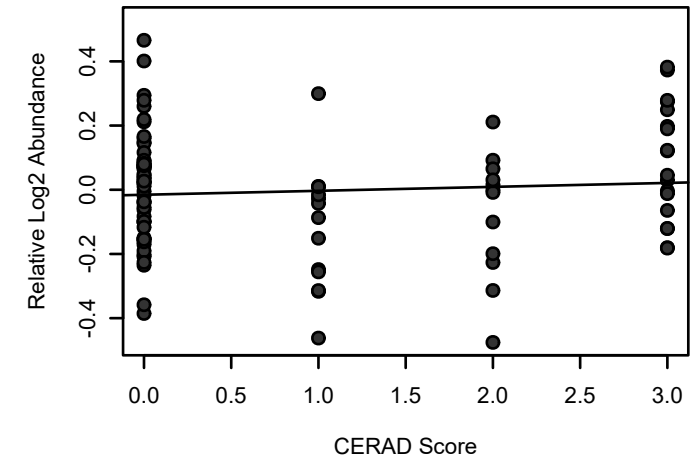

**SYN UPenn Mixed PRM**  
**M1 turquoise MEGA module member**  
**K-W ANOVA p: 3e-04**

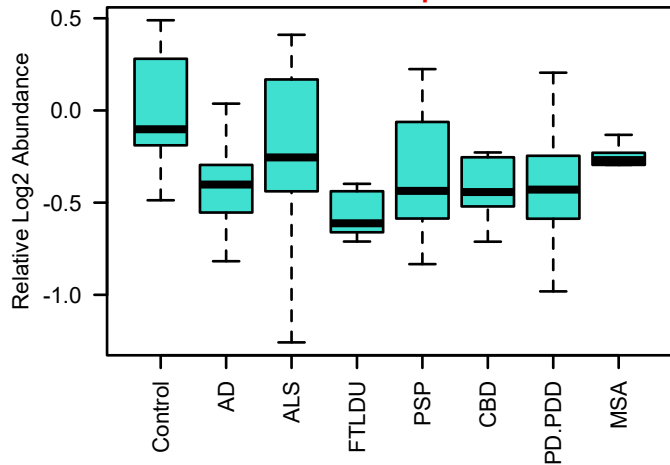

**SYN UPenn Mixed PRM**  
**K-W ANOVA p: 0.00012**

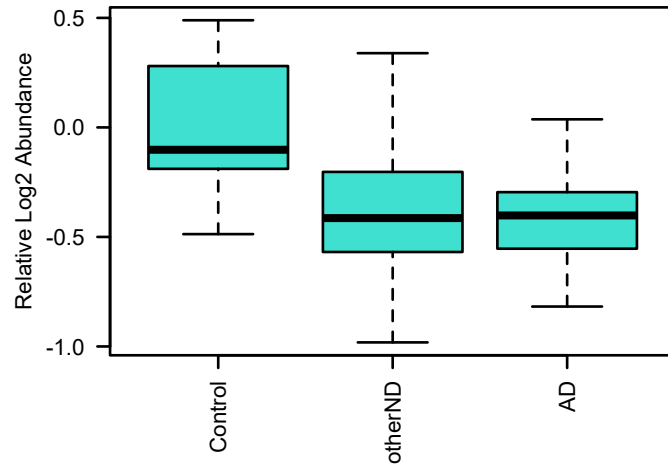

**bicor=-0.22, p=0.044**  
**cor=-0.23, p=0.035**

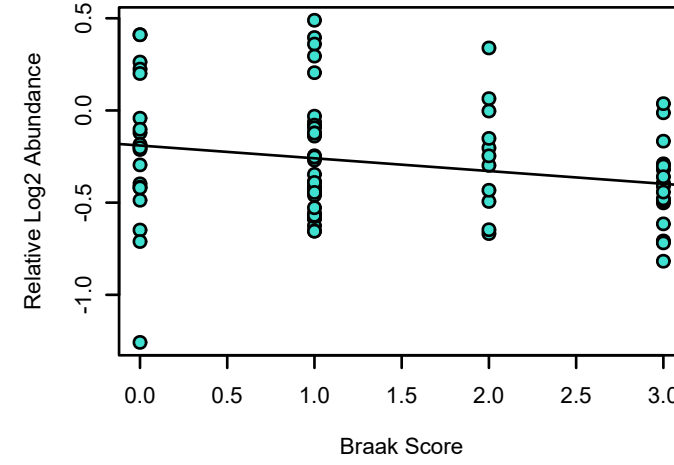

**bicor=-0.16, p=0.11**  
**cor=-0.16, p=0.11**

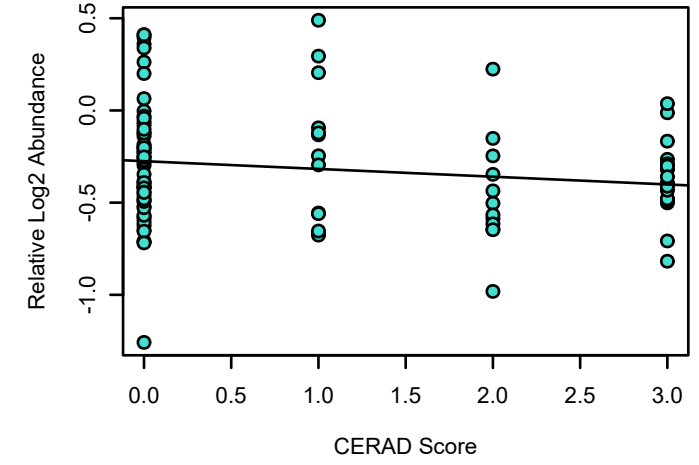

**PDHA2 UPenn Mixed PRM**  
**NA grey20 MEGA module member**  
**K-W ANOVA p: 1.4e-06**

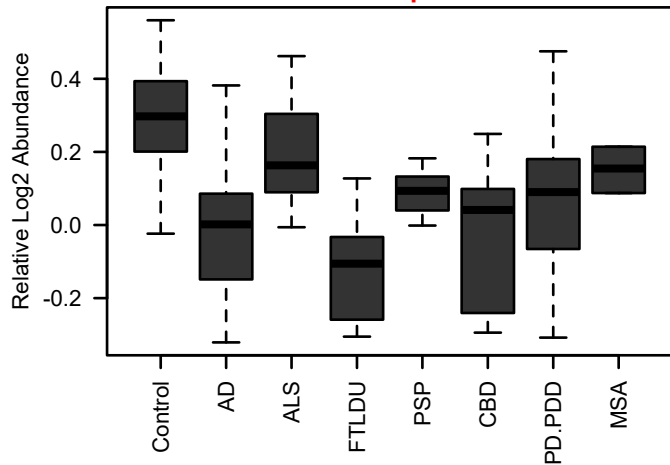

**PDHA2 UPenn Mixed PRM**  
**K-W ANOVA p: 4.4e-05**

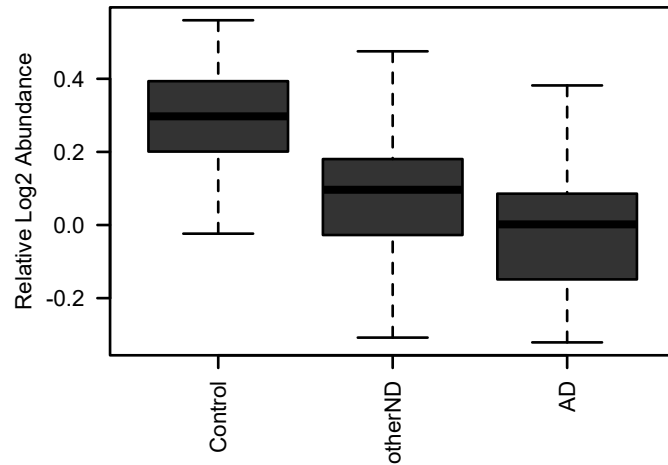

**bicor=-0.34, p=0.0017**  
**cor=-0.33, p=0.0022**

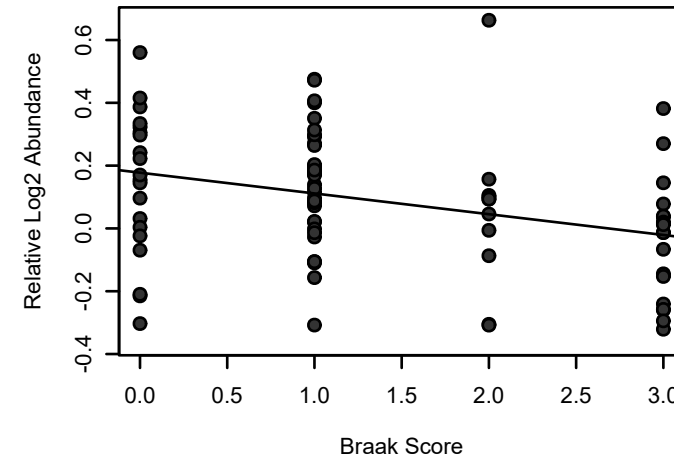

**bicor=-0.2, p=0.041**  
**cor=-0.21, p=0.036**

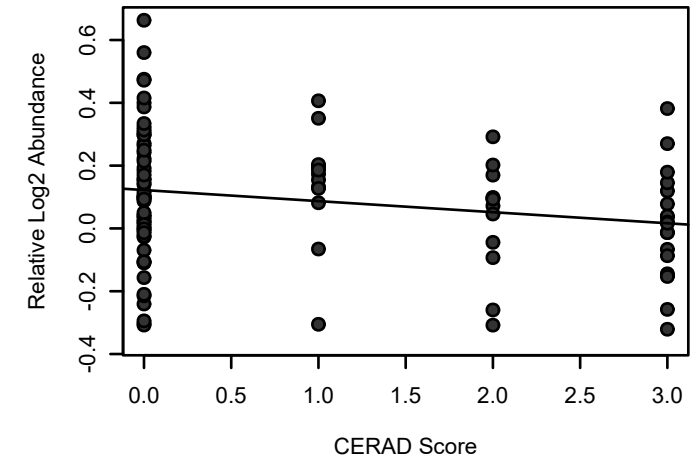

**PDHA1 UPenn Mixed PRM**  
**M3 brown MEGA module member**  
**K-W ANOVA p: 0.00053**

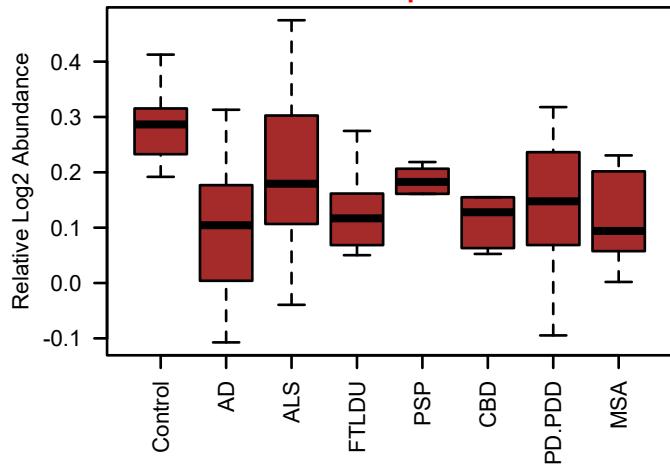

**PDHA1 UPenn Mixed PRM**  
**K-W ANOVA p: 2.1e-05**

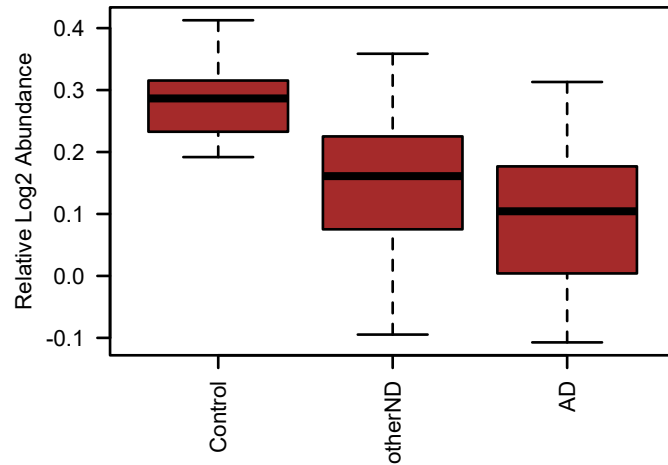

**bicor=-0.35, p=0.0013**  
**cor=-0.35, p=0.0011**

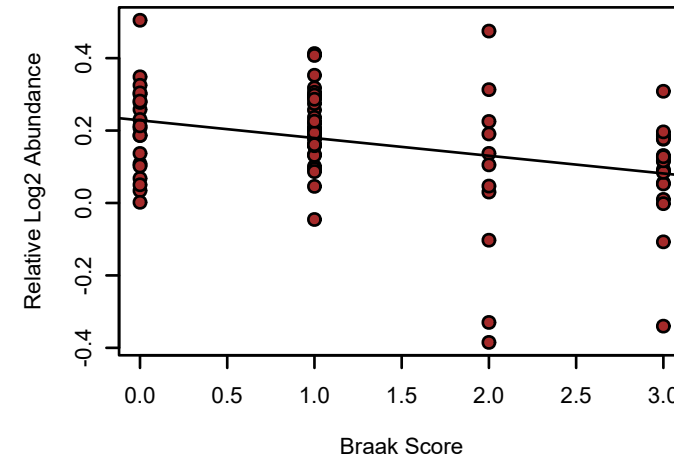

**bicor=-0.36, p=0.00024**  
**cor=-0.3, p=0.0024**

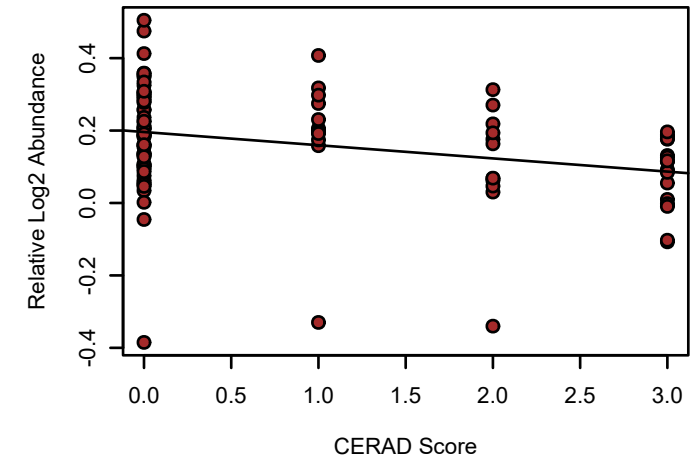

**HPS6 UPenn Mixed PRM**  
NA grey20 MEGA module member  
K-W ANOVA p: 4.2e-08

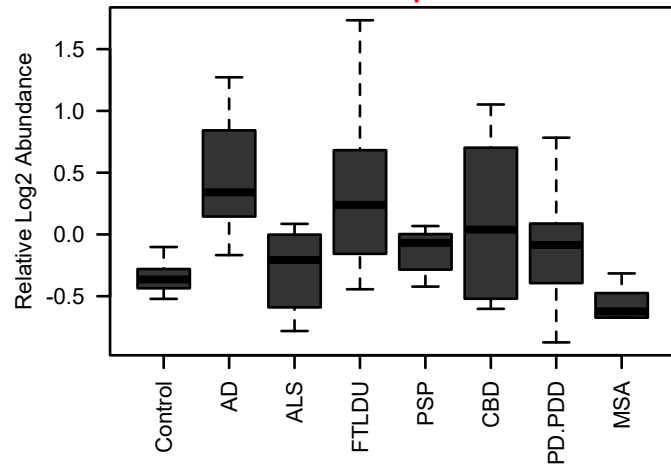

**HPS6 UPenn Mixed PRM**  
K-W ANOVA p: 1.1e-06

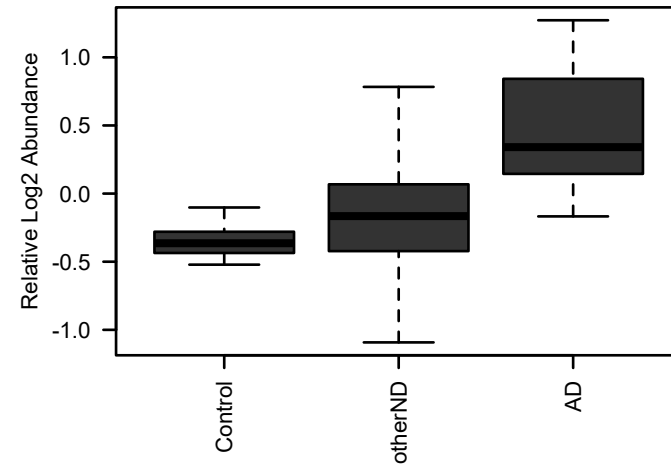

**bicor=0.47, p=6.2e-06**  
**cor=0.47, p=6.5e-06**

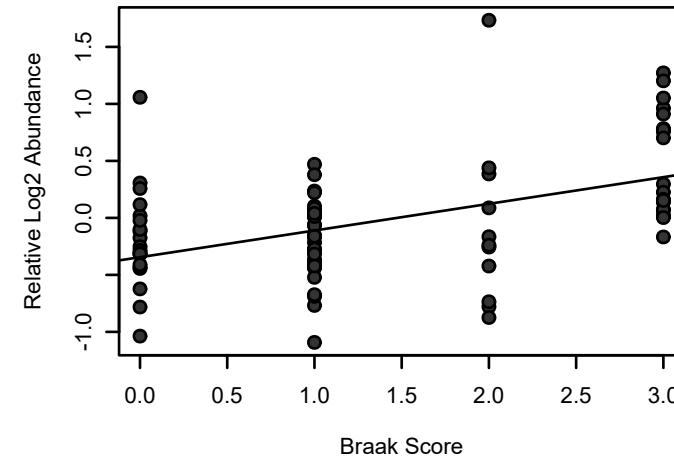

**bicor=0.42, p=1.7e-05**  
**cor=0.39, p=6e-05**

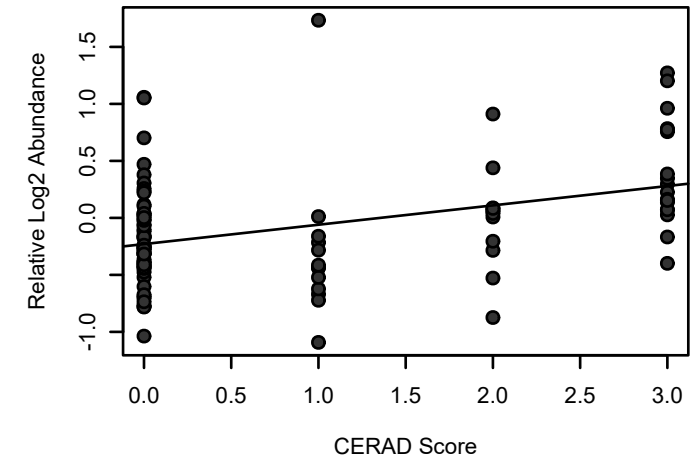

**ANXA5 UPenn Mixed PRM**  
M4 yellow MEGA module member  
K-W ANOVA p: 3.7e-08

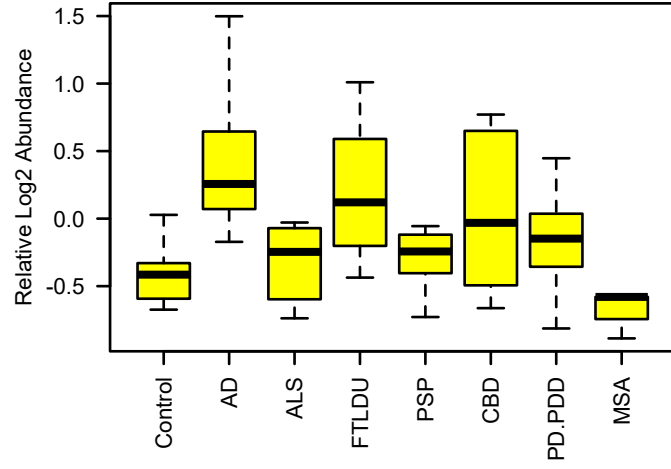

**ANXA5 UPenn Mixed PRM**  
K-W ANOVA p: 1.4e-06

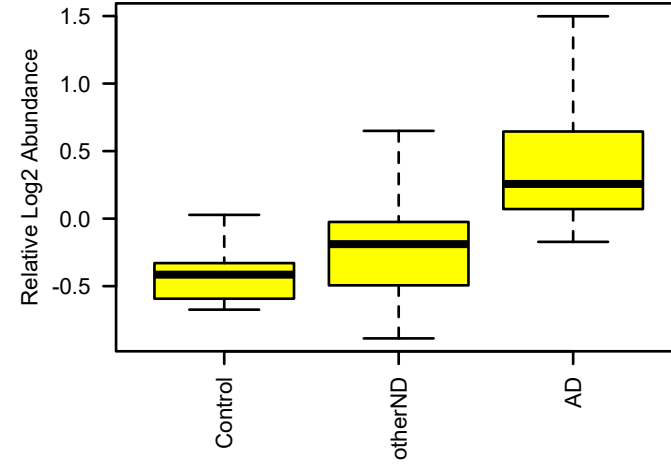

**bicor=0.46, p=9.7e-06**  
**cor=0.47, p=6.5e-06**

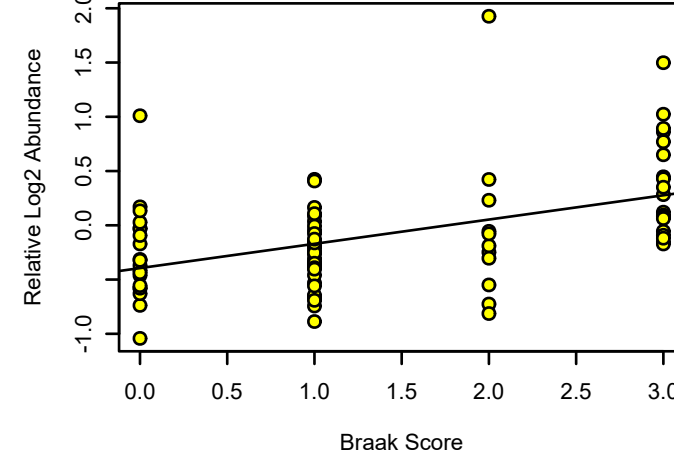

**bicor=0.4, p=4.3e-05**  
**cor=0.37, p=0.00015**

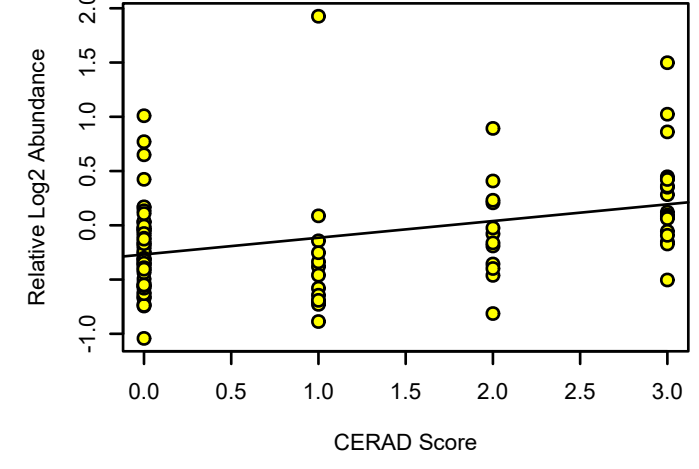

**CLTA UPenn Mixed PRM**  
M6 red MEGA module member  
K-W ANOVA p: 0.014

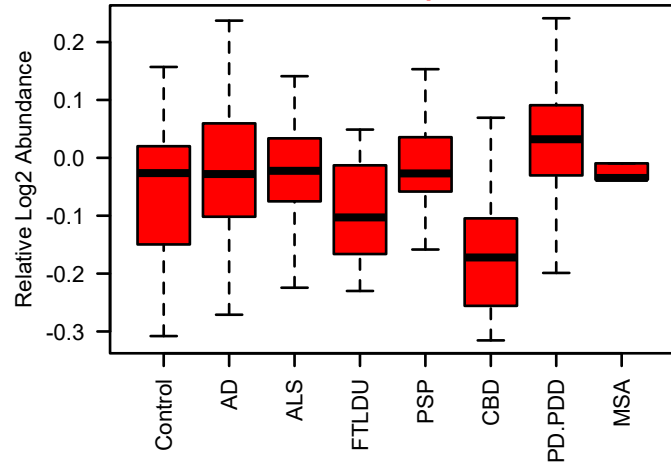

**CLTA UPenn Mixed PRM**  
K-W ANOVA p: 0.51

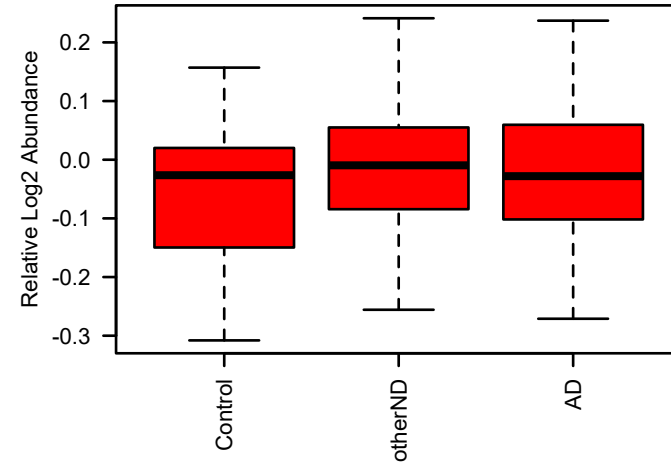

**bicor=0.056, p=0.61**  
**cor=0.054, p=0.63**

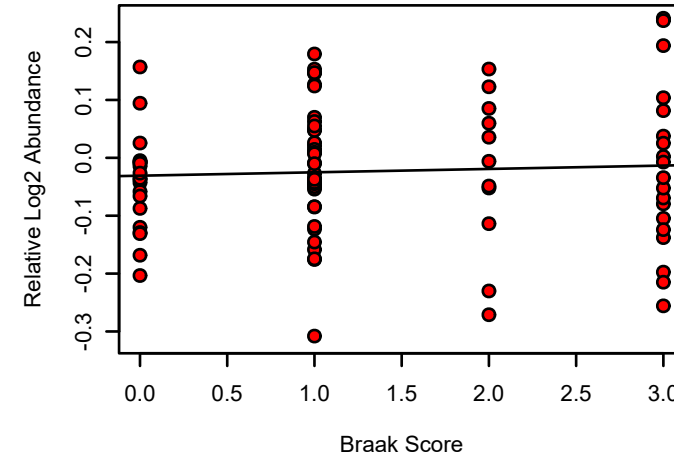

**bicor=0.0069, p=0.95**  
**cor=0.026, p=0.8**

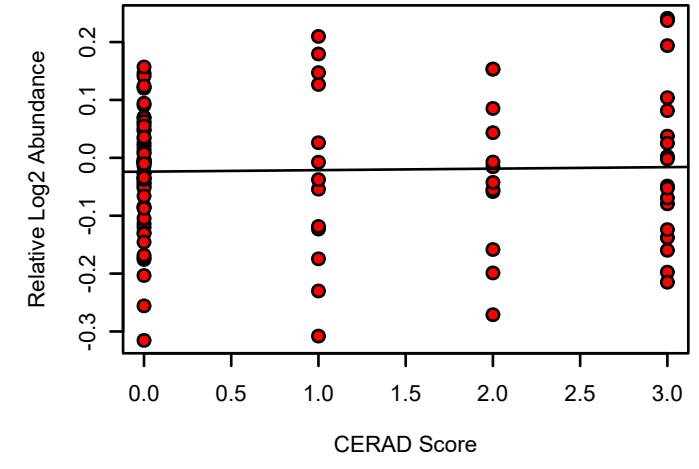

**CNP UPenn Mixed PRM**  
M2 blue MEGA module member  
K-W ANOVA p: 0.0081

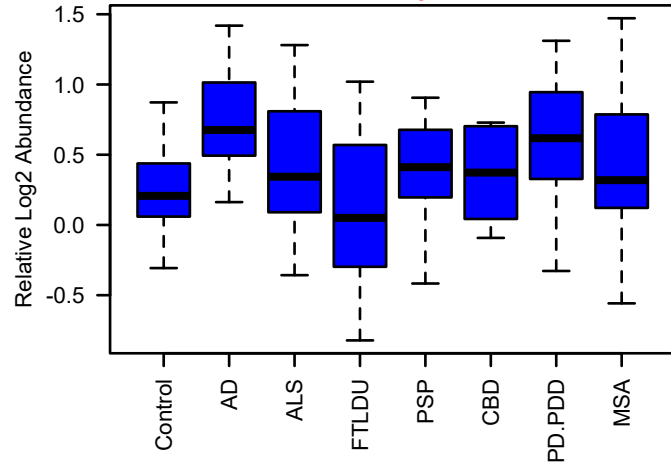

**CNP UPenn Mixed PRM**  
K-W ANOVA p: 0.011

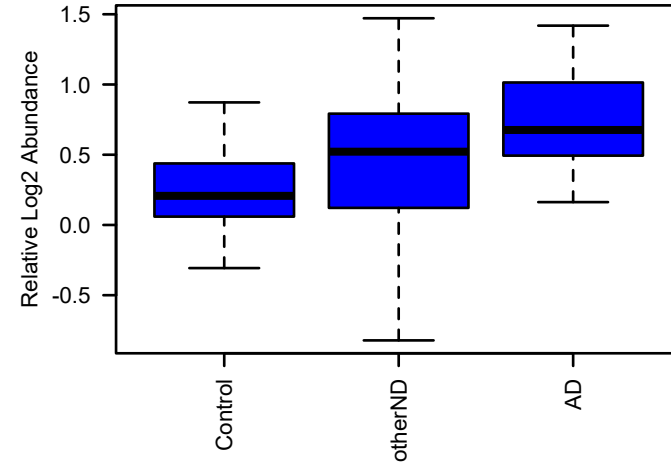

**bicor=0.28, p=0.01**  
**cor=0.31, p=0.0041**

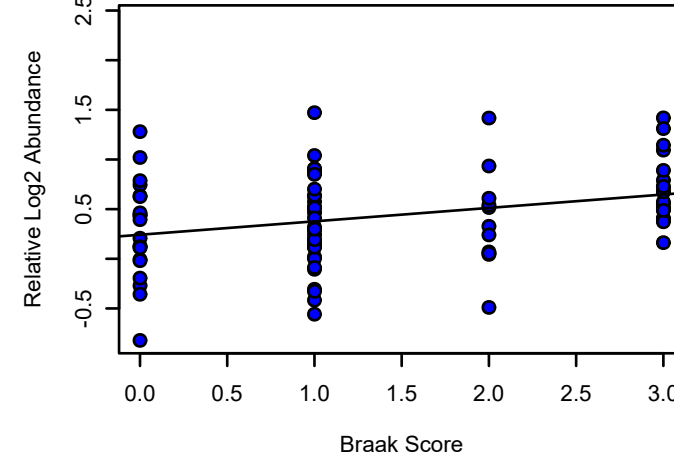

**bicor=0.29, p=0.0036**  
**cor=0.29, p=0.0034**

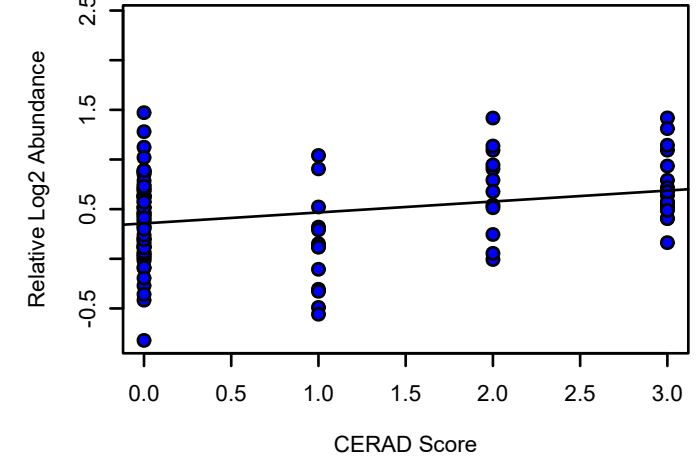

**DLD UPenn Mixed PRM**  
M3 brown MEGA module member  
K-W ANOVA p: 0.0056

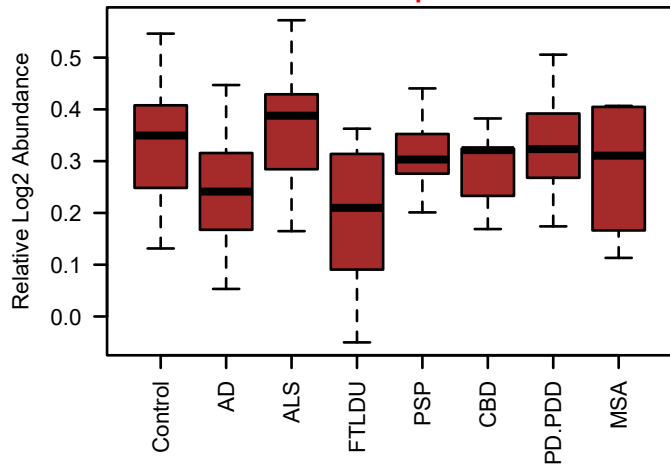

**DLD UPenn Mixed PRM**  
K-W ANOVA p: 0.061

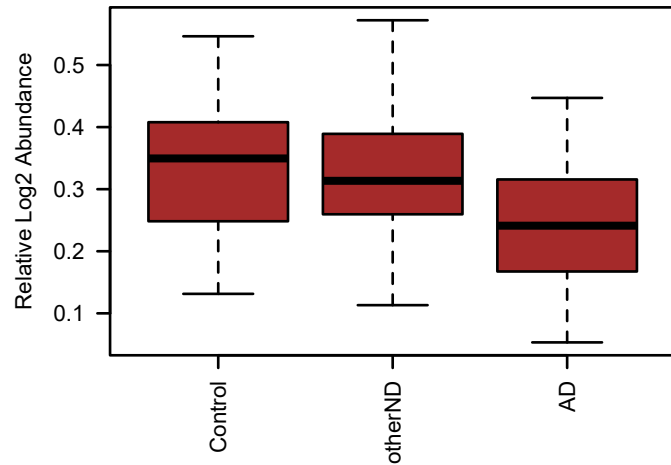

**bicor=-0.21, p=0.054**  
**cor=-0.21, p=0.055**

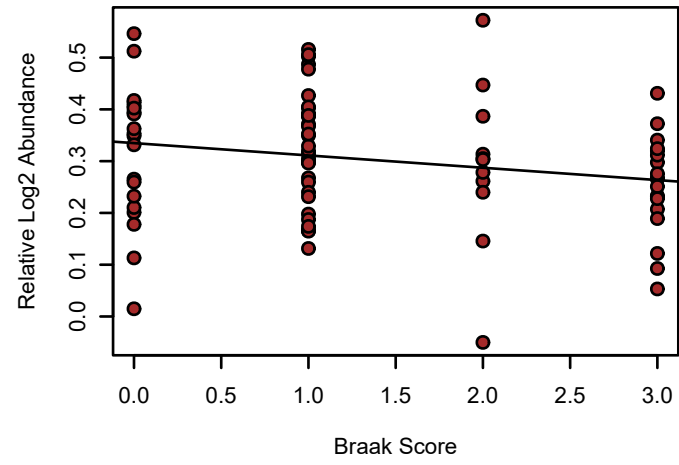

**bicor=-0.18, p=0.07**  
**cor=-0.18, p=0.073**

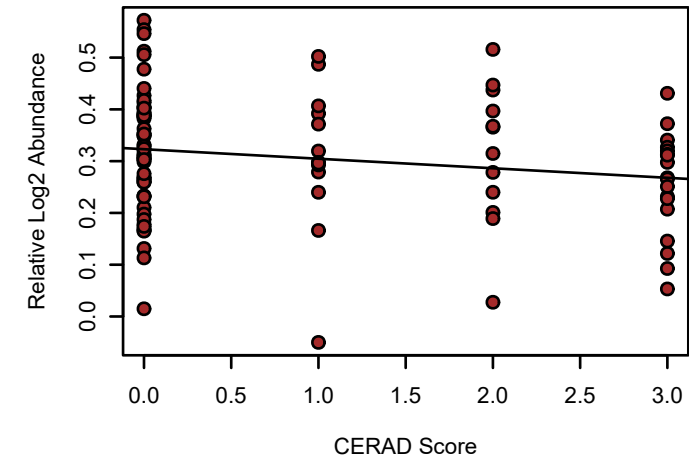

**DLAT UPenn Mixed PRM**  
M3 brown MEGA module member  
K-W ANOVA p: 0.13

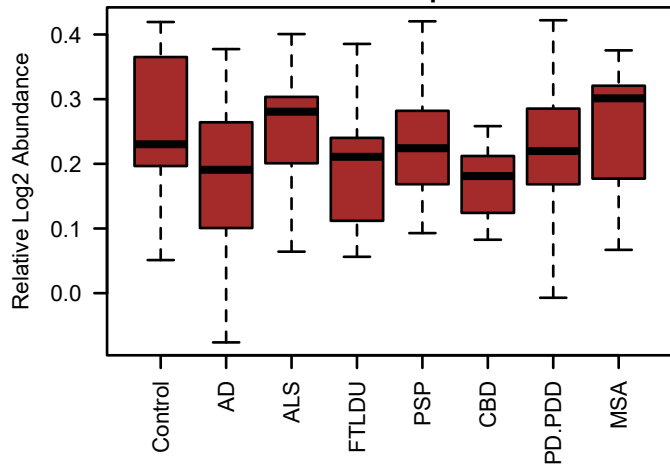

**DLAT UPenn Mixed PRM**  
K-W ANOVA p: 0.048

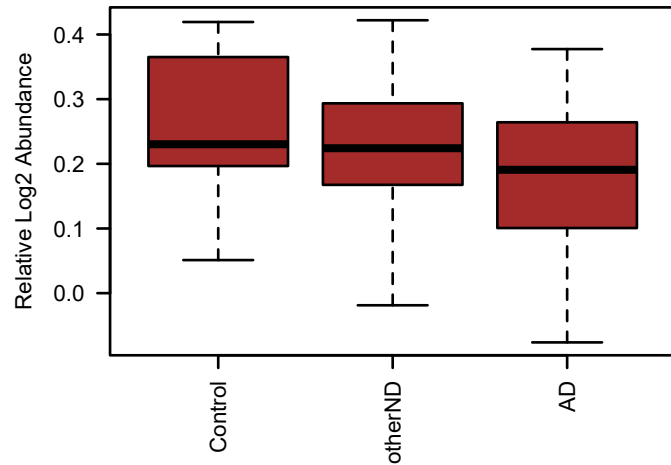

**bicor=-0.22, p=0.048**  
**cor=-0.24, p=0.028**

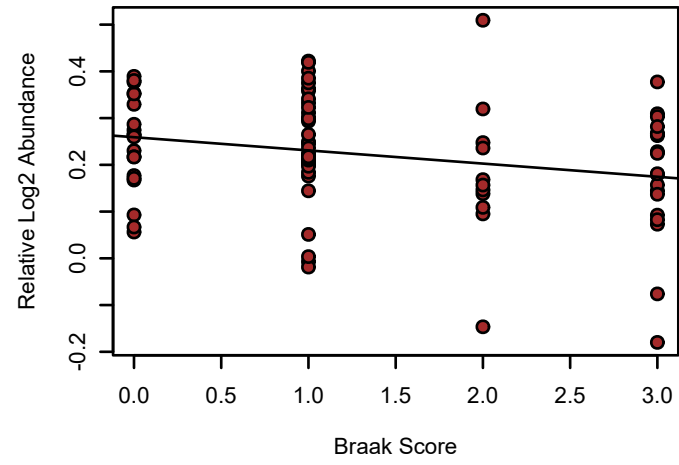

**bicor=-0.16, p=0.12**  
**cor=-0.18, p=0.073**

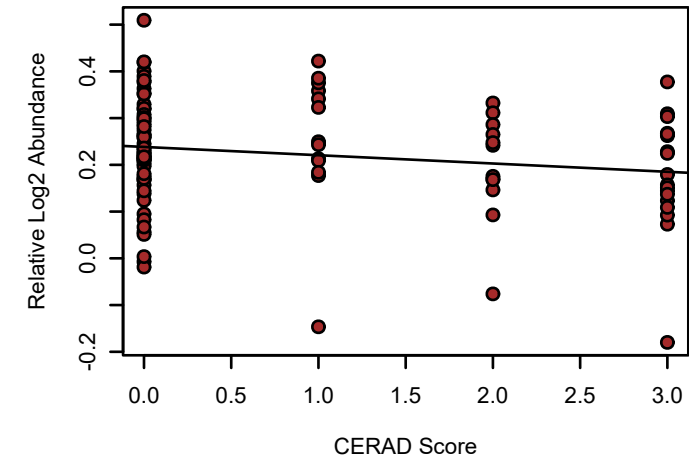

**COX5B UPenn Mixed PRM**  
M3 brown MEGA module member  
K-W ANOVA p: 0.18

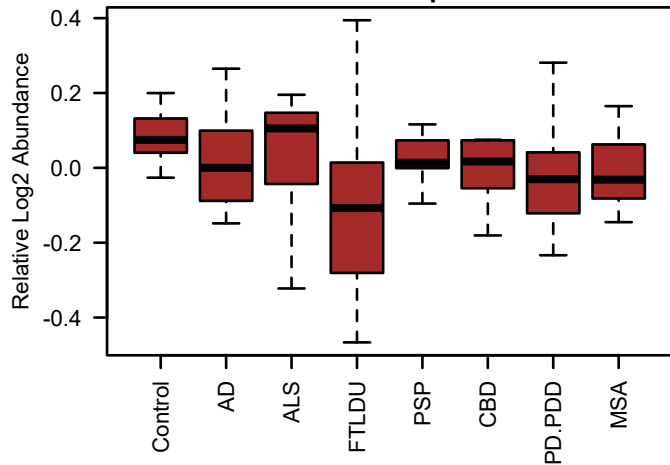

**COX5B UPenn Mixed PRM**  
K-W ANOVA p: 0.1

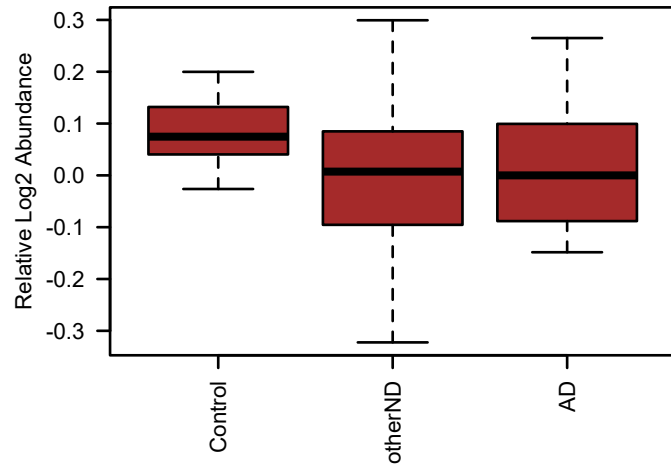

**bicor=-0.14, p=0.2**  
**cor=-0.14, p=0.2**

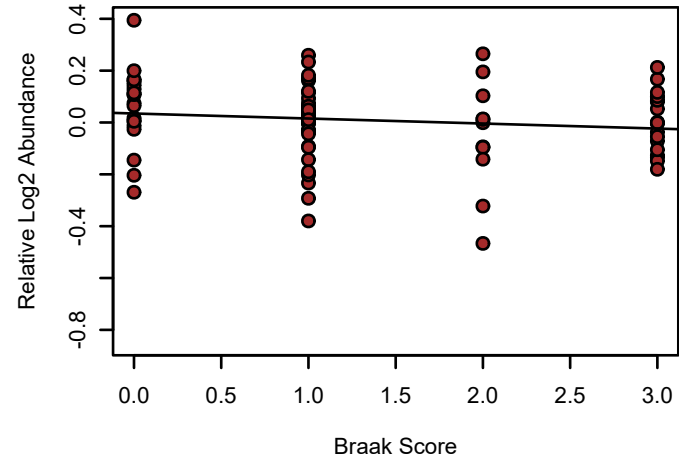

**bicor=-0.13, p=0.2**  
**cor=-0.096, p=0.34**

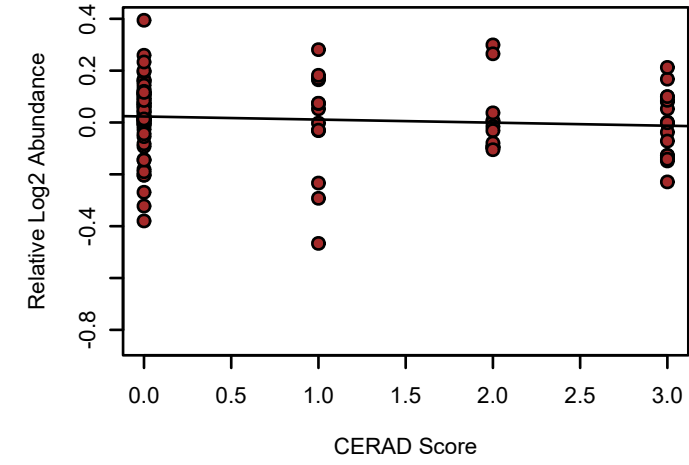

**CHGA UPenn Mixed PRM**  
NA grey MEGA module member  
K-W ANOVA p: 0.00092

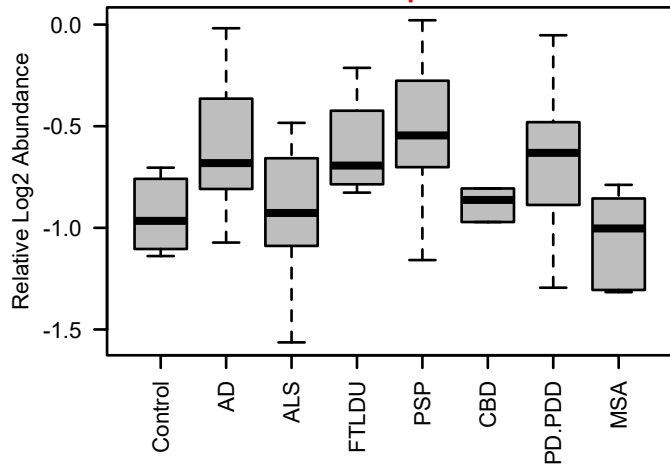

**CHGA UPenn Mixed PRM**  
K-W ANOVA p: 0.011

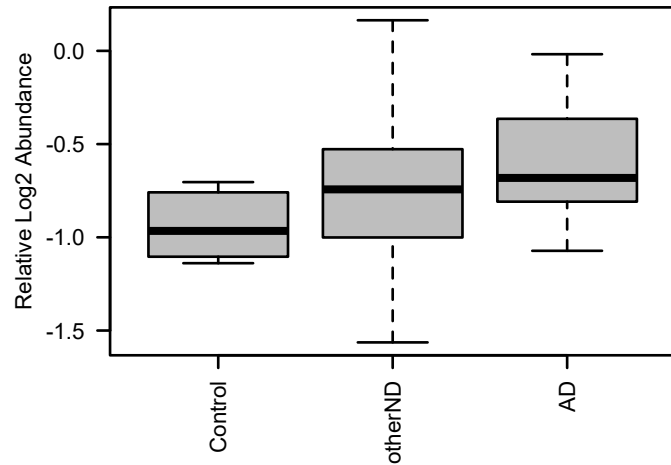

**bicor=0.28, p=0.01**  
**cor=0.28, p=0.0099**

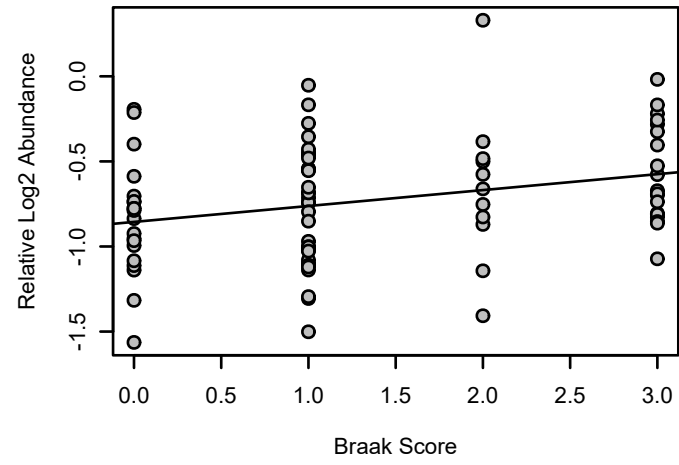

**bicor=0.28, p=0.0054**  
**cor=0.28, p=0.0048**

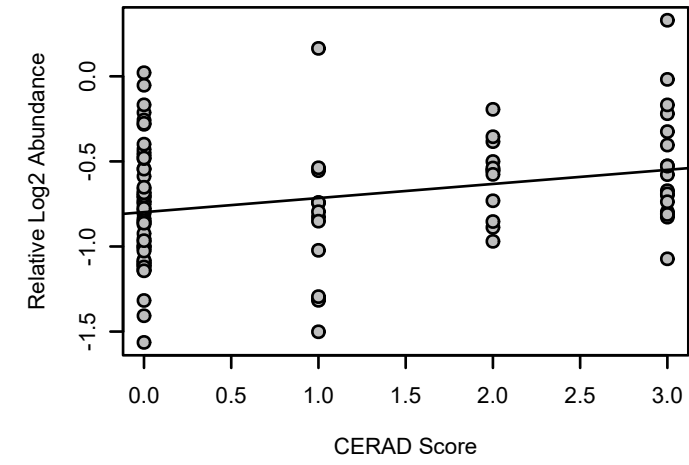

**ESD UPenn Mixed PRM**  
**M4 yellow MEGA module member**  
**K-W ANOVA p: 0.29**

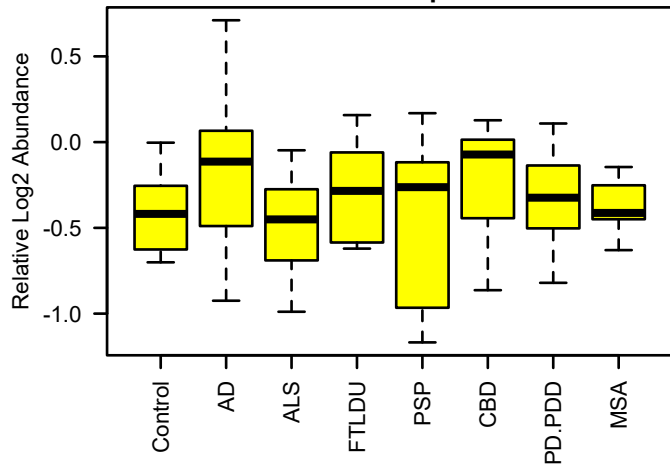

**ESD UPenn Mixed PRM**  
**K-W ANOVA p: 0.41**

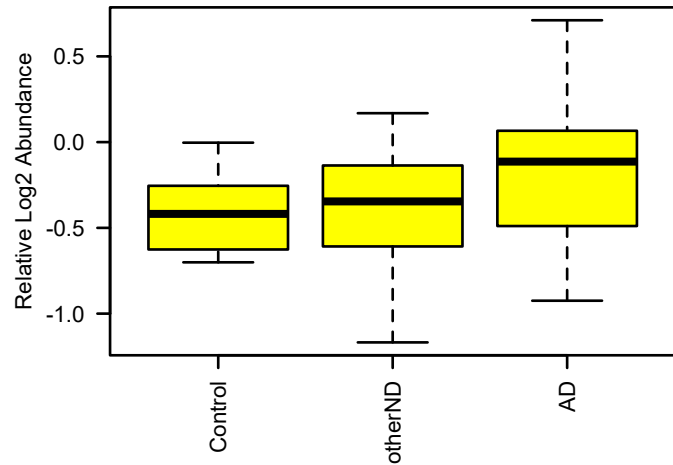

**bicor=0.15, p=0.16**  
**cor=0.11, p=0.32**

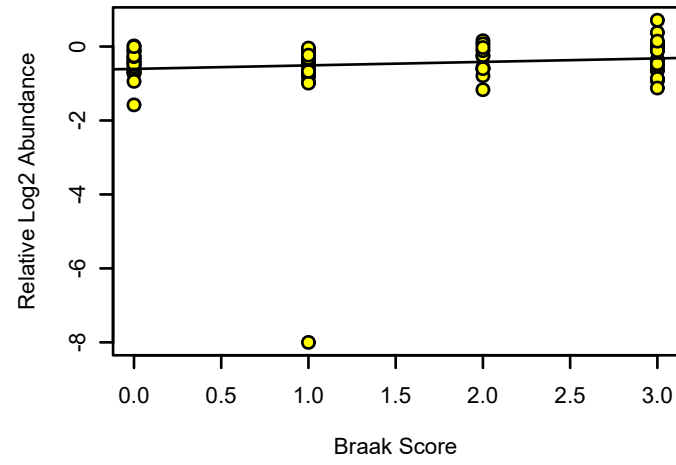

**bicor=0.28, p=0.0041**  
**cor=0.19, p=0.058**

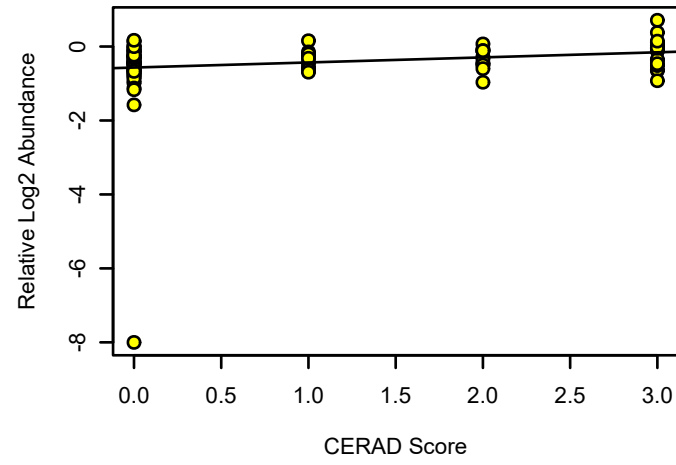

**HSPD1 UPenn Mixed PRM**  
**M3 brown MEGA module member**  
**K-W ANOVA p: 0.004**

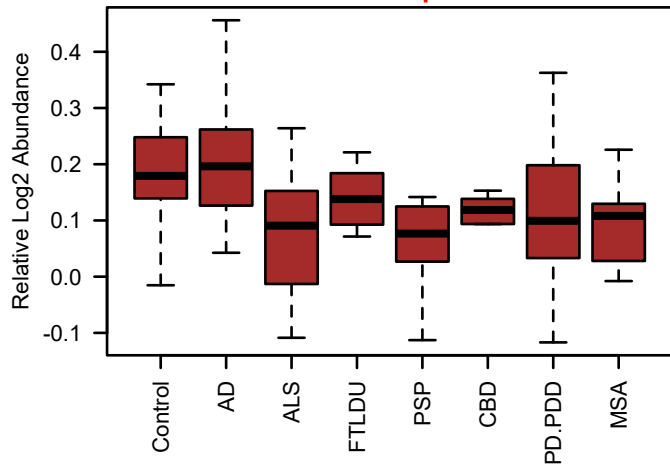

**HSPD1 UPenn Mixed PRM**  
**K-W ANOVA p: 0.00013**

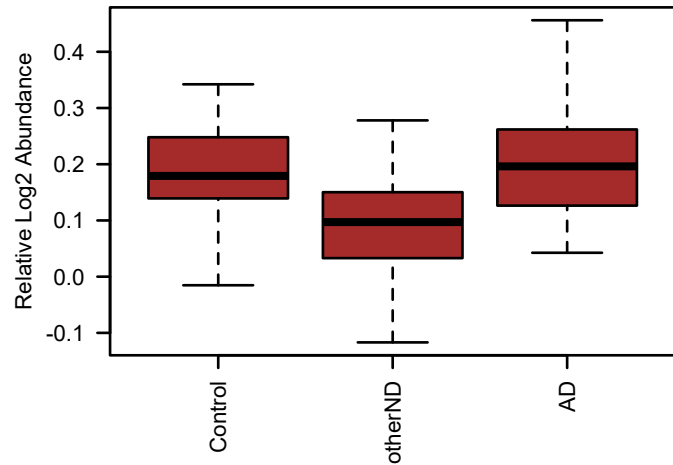

**bicor=0.13, p=0.23**  
**cor=0.14, p=0.2**

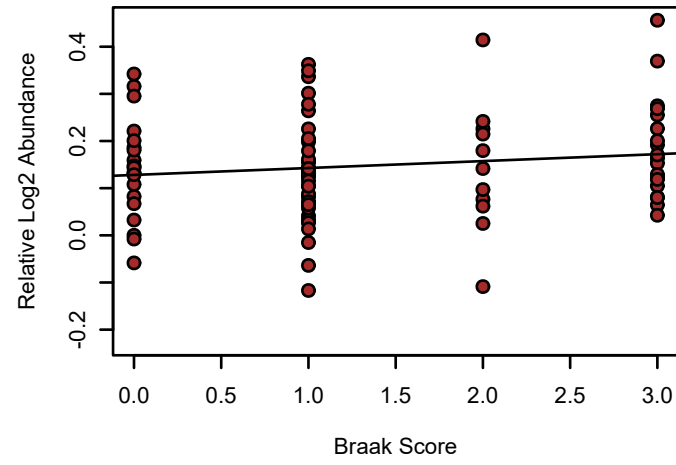

**bicor=0.12, p=0.24**  
**cor=0.14, p=0.16**

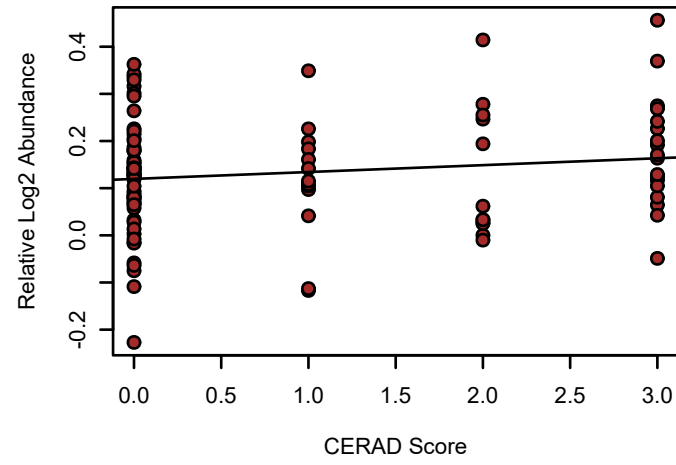

**PDHB UPenn Mixed PRM**  
**M3 brown MEGA module member**  
**K-W ANOVA p: 0.0019**

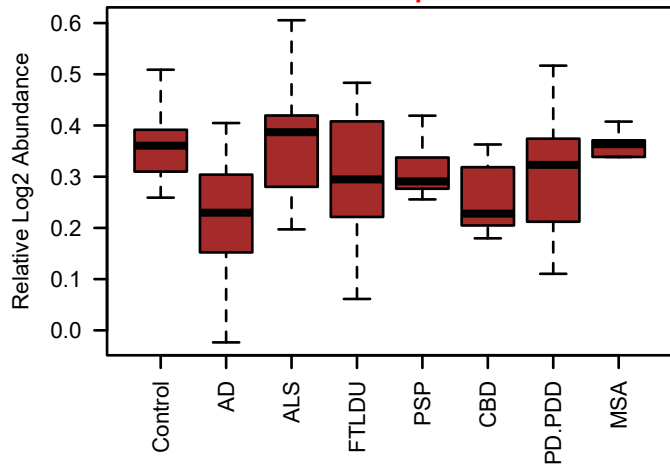

**PDHB UPenn Mixed PRM**  
**K-W ANOVA p: 2e-04**

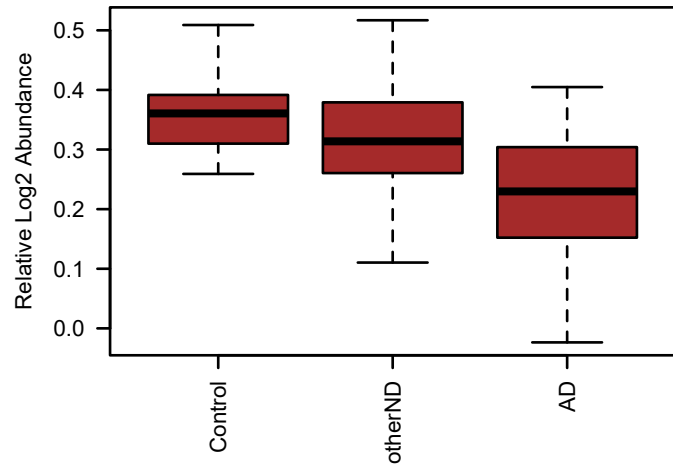

**bicor=-0.36, p=0.00074**  
**cor=-0.39, p=0.00025**

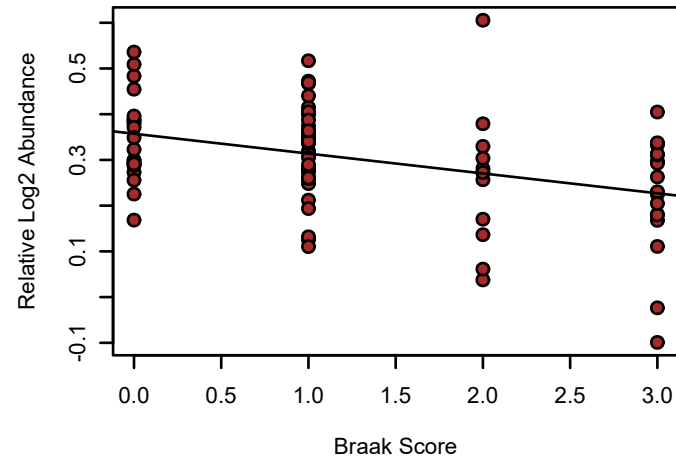

**bicor=-0.29, p=0.0036**  
**cor=-0.3, p=0.0024**

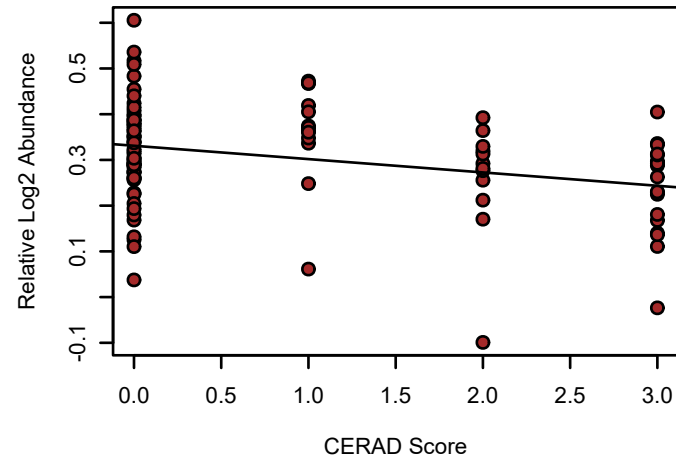

**SLC25A4 UPenn Mixed PRM**  
**M3 brown MEGA module member**  
**K-W ANOVA p: 0.5**

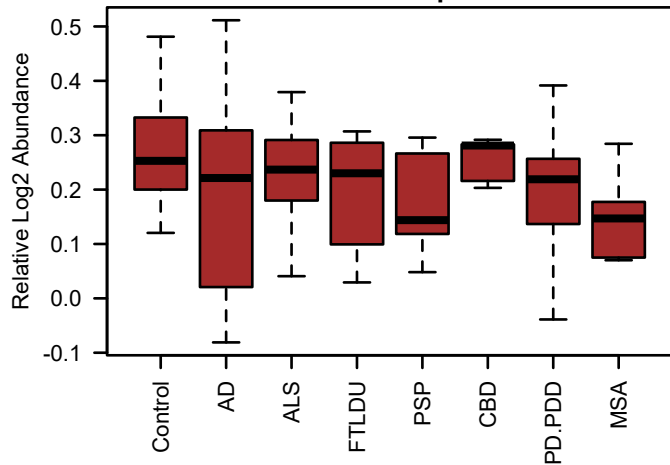

**SLC25A4 UPenn Mixed PRM**  
**K-W ANOVA p: 0.15**

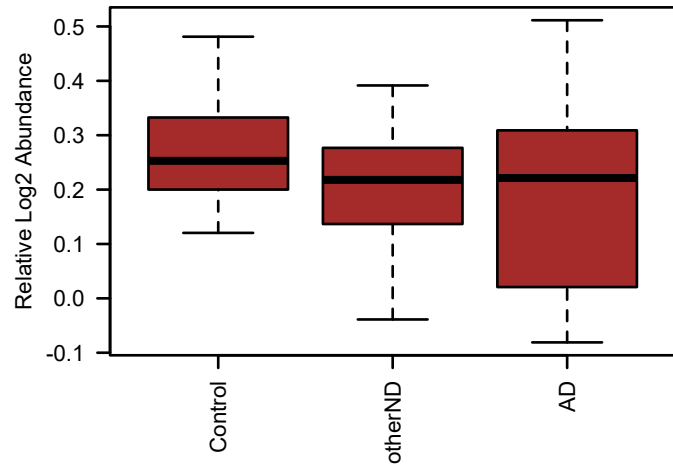

**bicor=-0.092, p=0.41**  
**cor=-0.16, p=0.15**

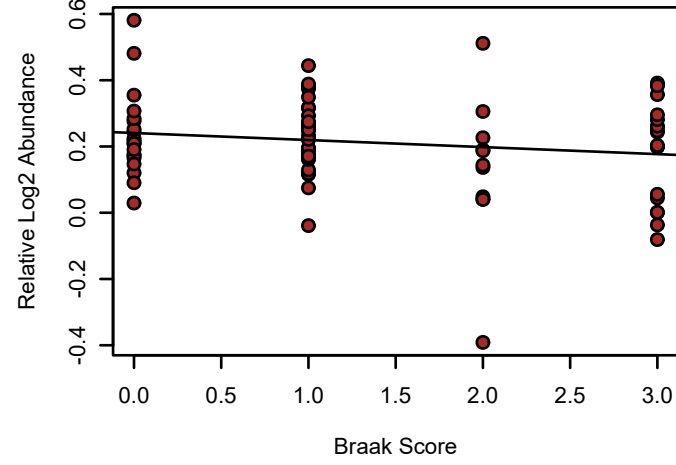

**bicor=-0.17, p=0.095**  
**cor=-0.18, p=0.073**

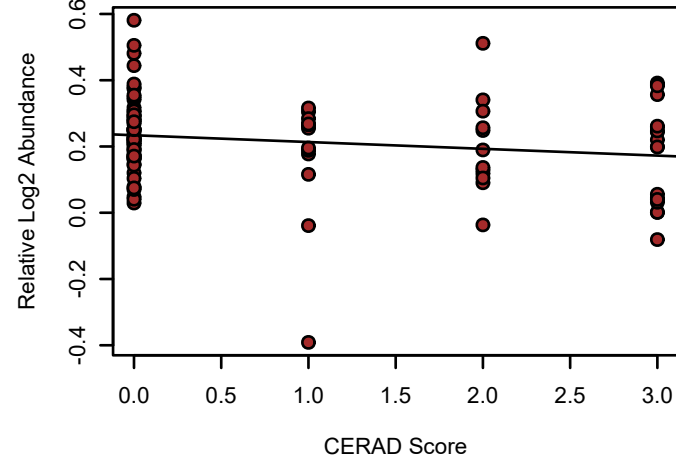

**SLC25A6 UPenn Mixed PRM**  
M3 brown MEGA module member  
K-W ANOVA p: 0.066

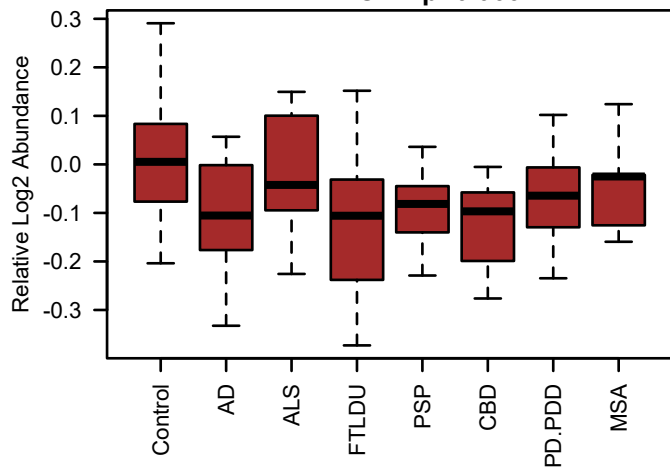

**SLC25A6 UPenn Mixed PRM**  
K-W ANOVA p: 0.021

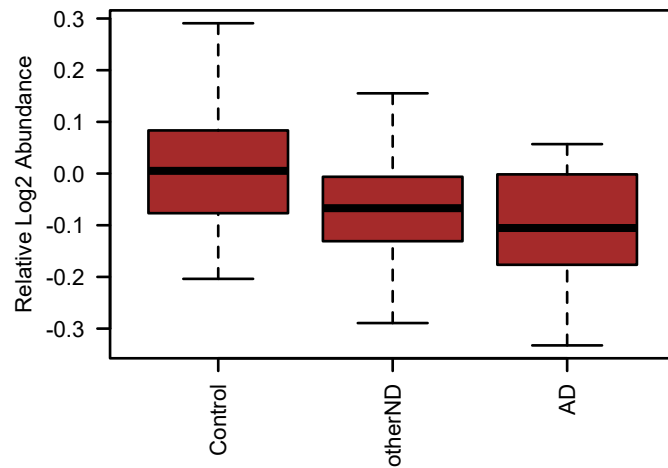

**bicor=-0.19, p=0.078**  
**cor=-0.22, p=0.044**

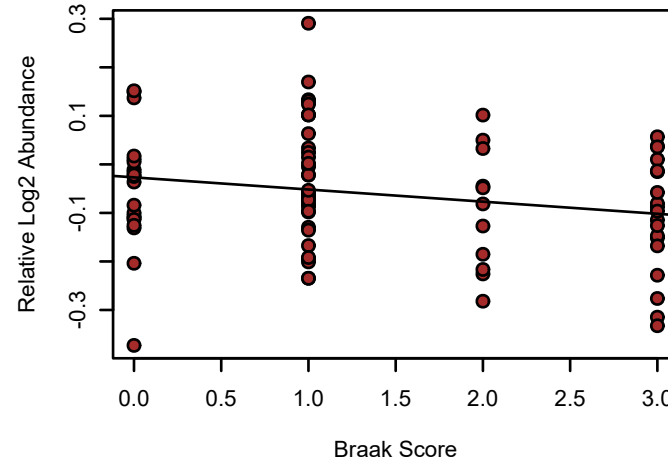

**bicor=-0.15, p=0.14**  
**cor=-0.16, p=0.11**

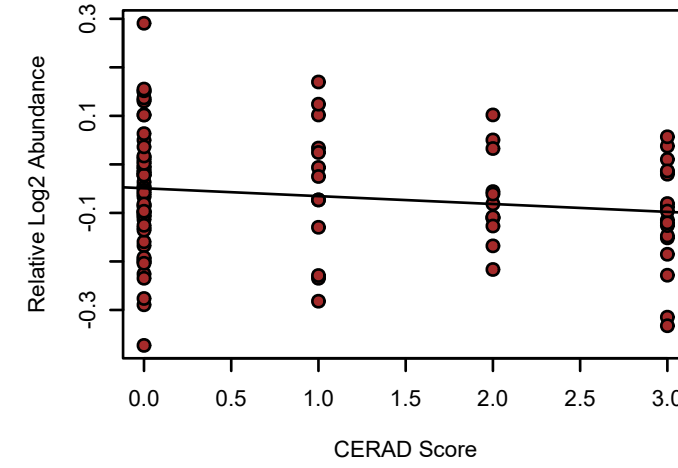

**XRCC6 UPenn Mixed PRM**  
M4 yellow MEGA module member  
K-W ANOVA p: 0.0019

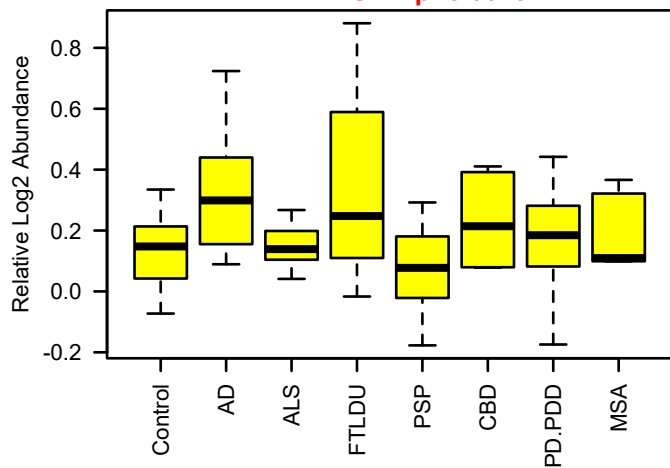

**XRCC6 UPenn Mixed PRM**  
K-W ANOVA p: 0.004

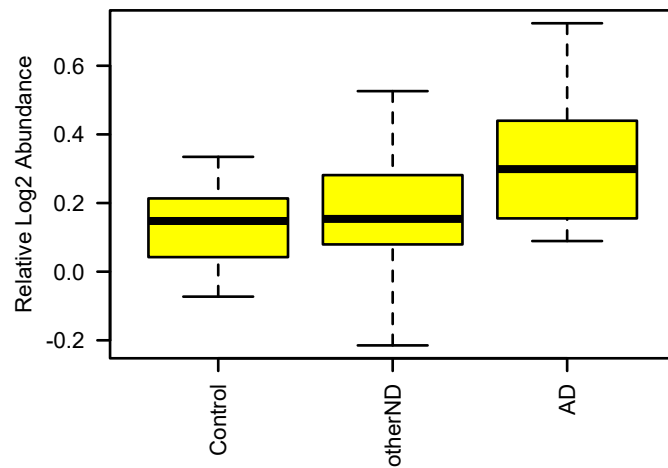

**bicor=0.32, p=0.0028**  
**cor=0.31, p=0.0041**

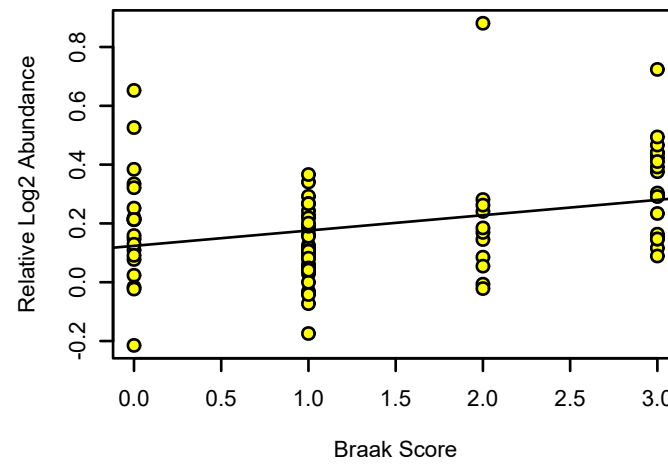

**bicor=0.25, p=0.011**  
**cor=0.24, p=0.016**

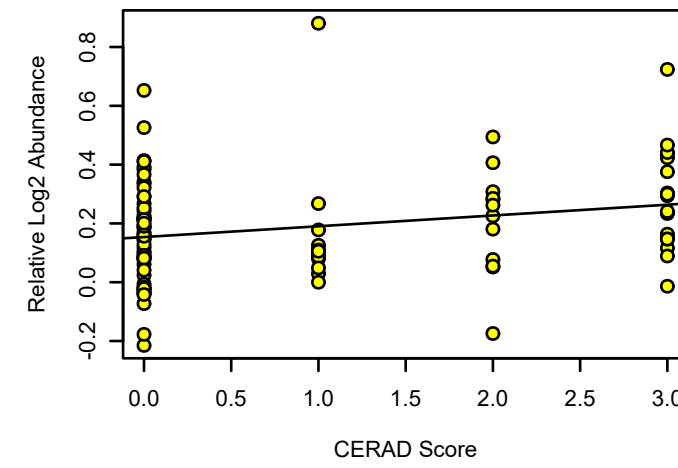

**XRCC5 UPenn Mixed PRM**  
M10 purple MEGA module member  
K-W ANOVA p: 2.9e-05

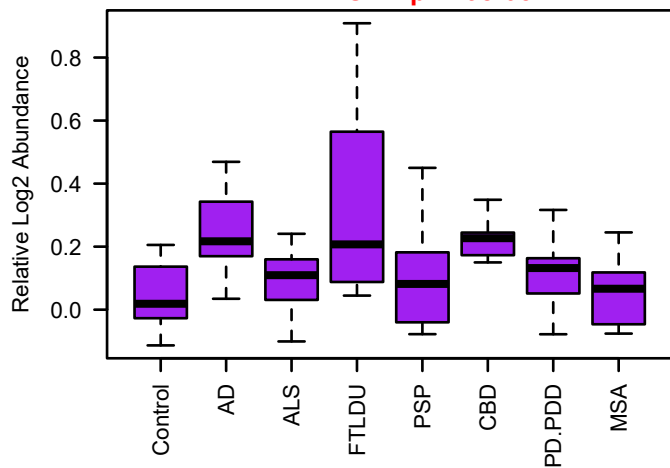

**XRCC5 UPenn Mixed PRM**  
K-W ANOVA p: 0.00083

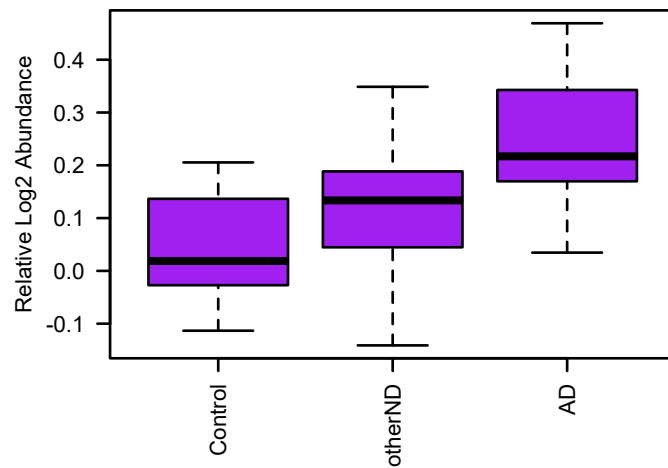

**bicor=0.37, p=0.00052**  
**cor=0.33, p=0.0022**

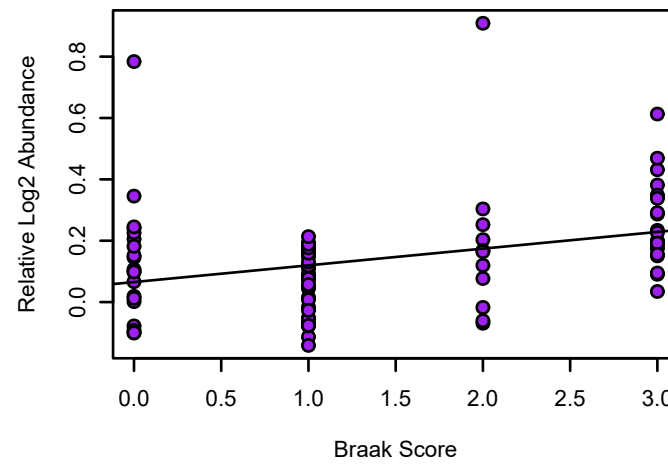

**bicor=0.27, p=0.0058**  
**cor=0.22, p=0.028**

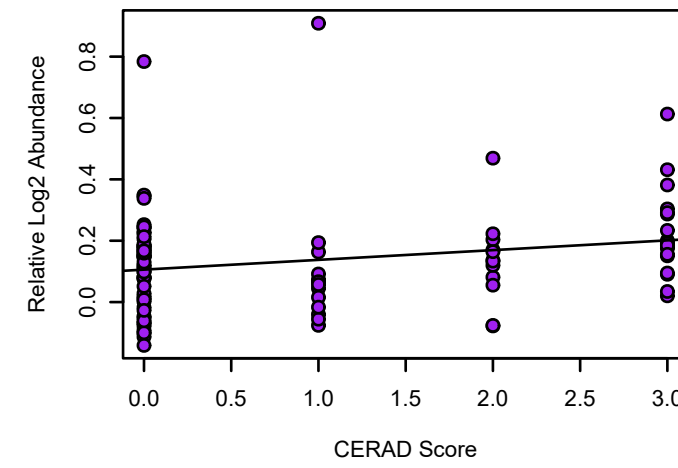

**COX41 UPenn Mixed PRM**  
M3 brown MEGA module member  
K-W ANOVA p: 0.31

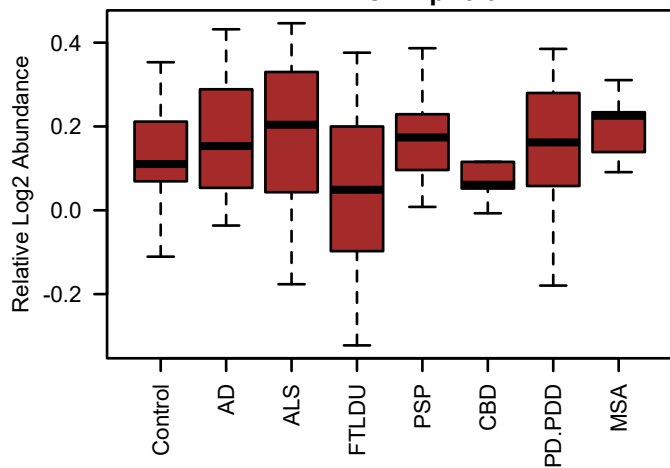

**COX41 UPenn Mixed PRM**  
K-W ANOVA p: 0.76

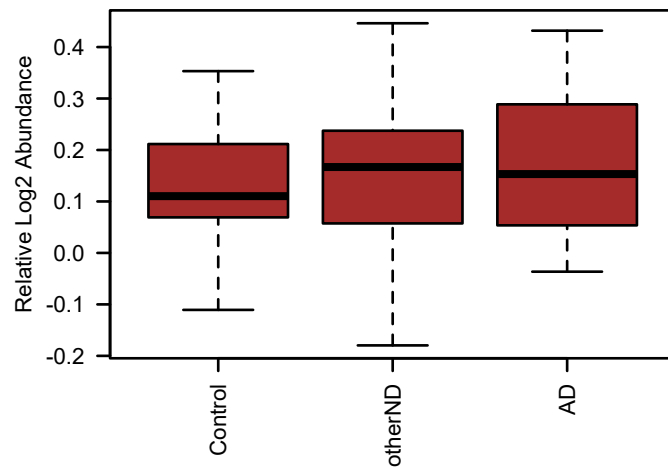

**bicor=-0.051, p=0.65**  
**cor=-0.081, p=0.46**

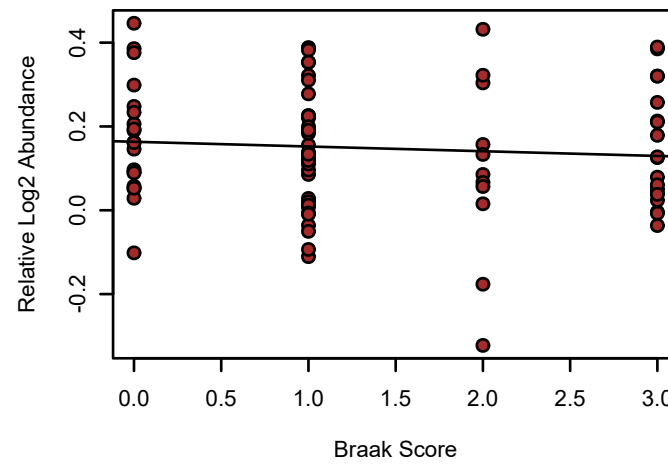

**bicor=0.037, p=0.71**  
**cor=0.041, p=0.69**

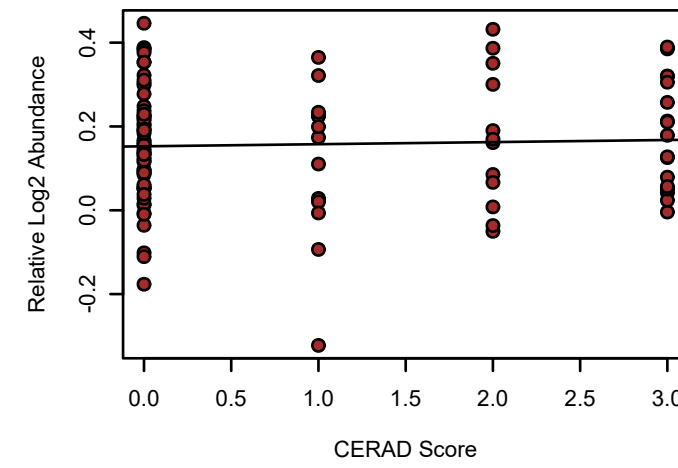

**ATP1A3 UPenn Mixed PRM**  
M3 brown MEGA module member  
K-W ANOVA p: 0.24

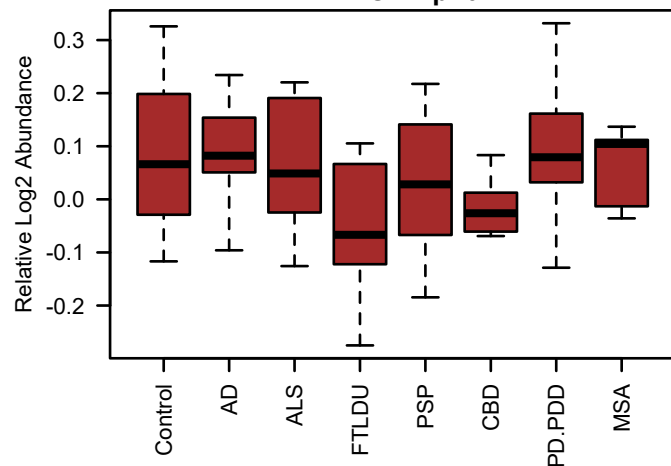

**ATP1A3 UPenn Mixed PRM**  
K-W ANOVA p: 0.54

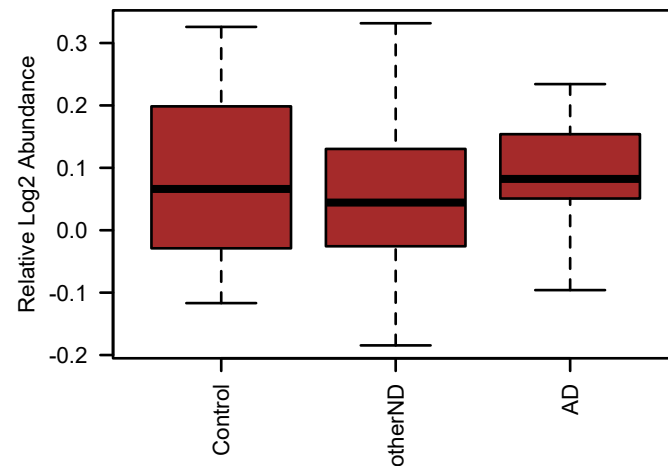

**bicor=0.037, p=0.74**  
**cor=-0.017, p=0.88**

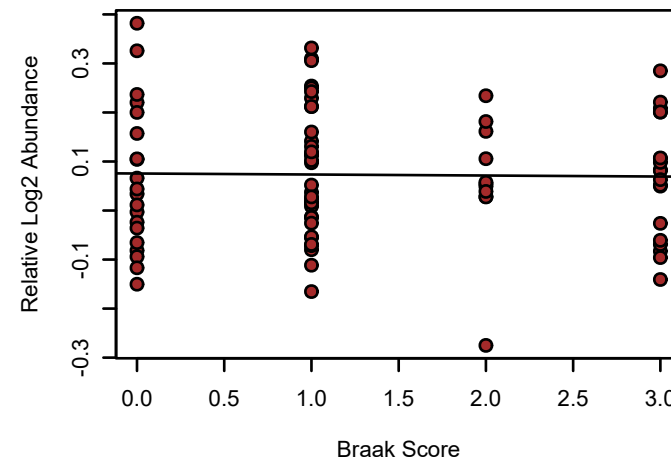

**bicor=-0.017, p=0.87**  
**cor=-0.032, p=0.75**

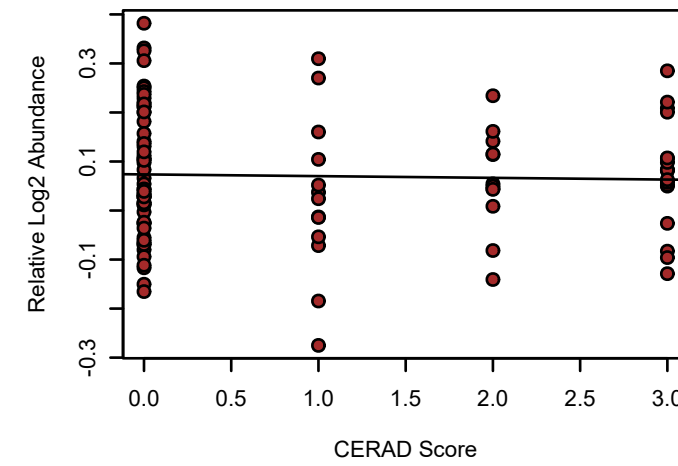

**GFAP UPenn Mixed PRM**  
M4 yellow MEGA module member  
K-W ANOVA p: 2.7e-07

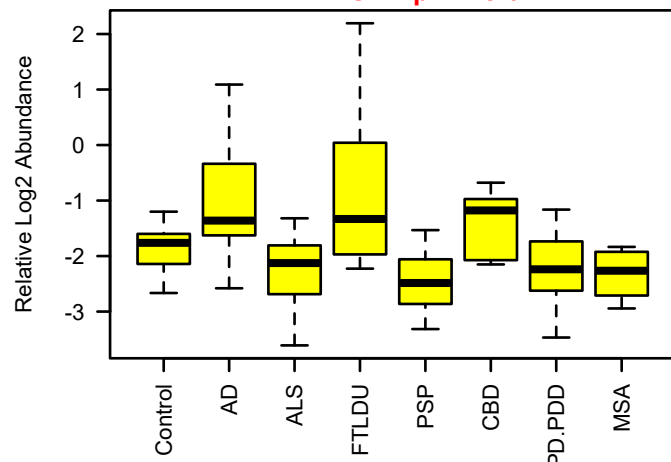

**GFAP UPenn Mixed PRM**  
K-W ANOVA p: 0.00011

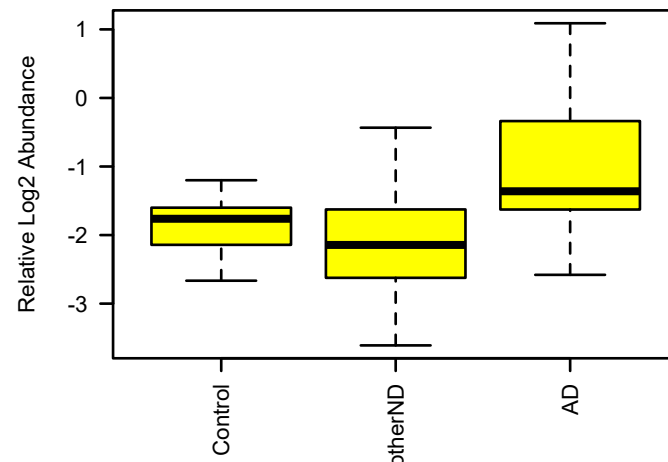

**bicor=0.33, p=0.0019**  
**cor=0.37, p=0.00053**

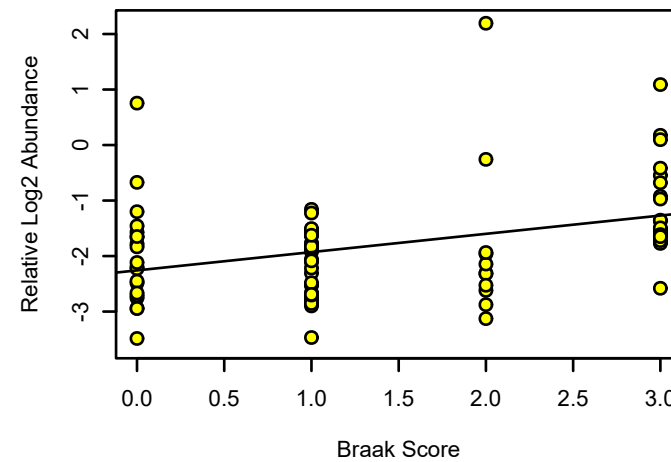

**bicor=0.34, p=0.00049**  
**cor=0.32, p=0.0012**

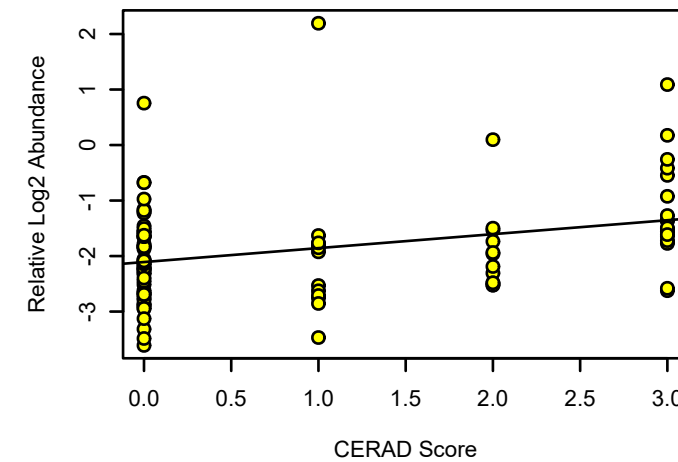

**PKM UPenn Mixed PRM**  
M4 yellow MEGA module member  
K-W ANOVA p: 3.1e-06

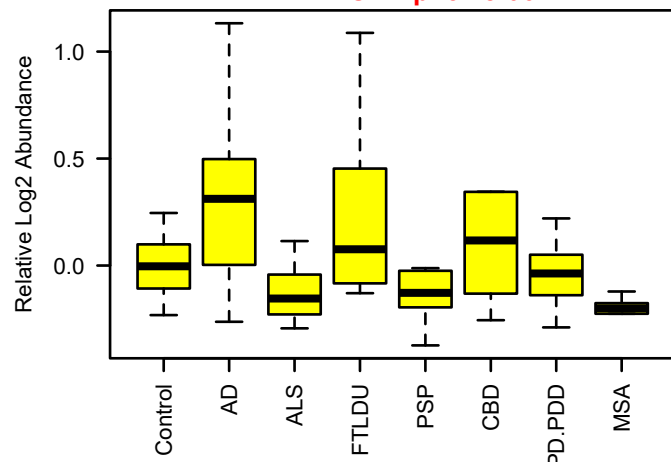

**PKM UPenn Mixed PRM**  
K-W ANOVA p: 1.7e-05

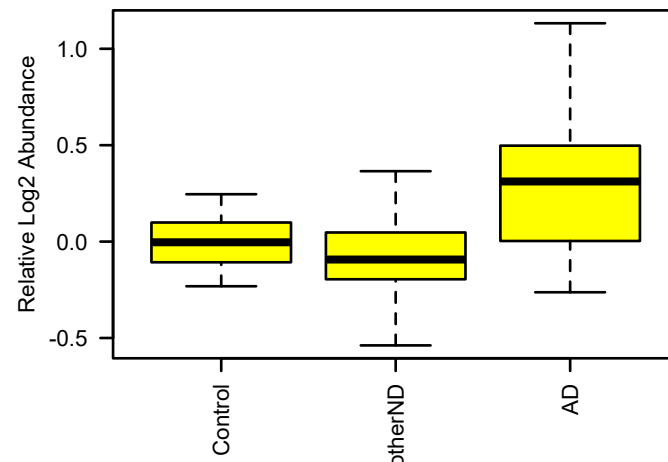

**bicor=0.36, p=0.00082**  
**cor=0.4, p=0.00016**

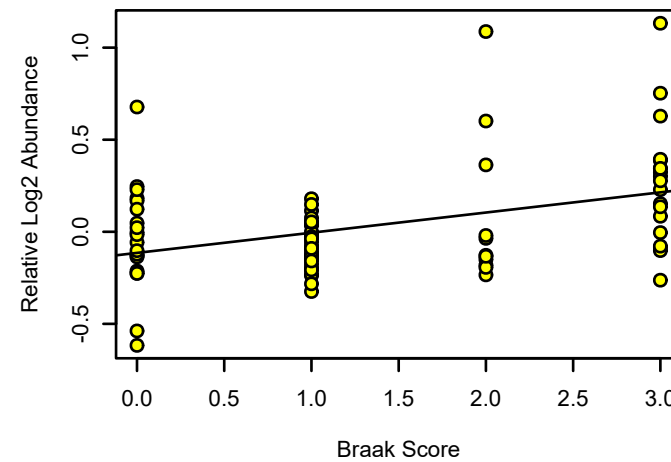

**bicor=0.21, p=0.035**  
**cor=0.26, p=0.009**

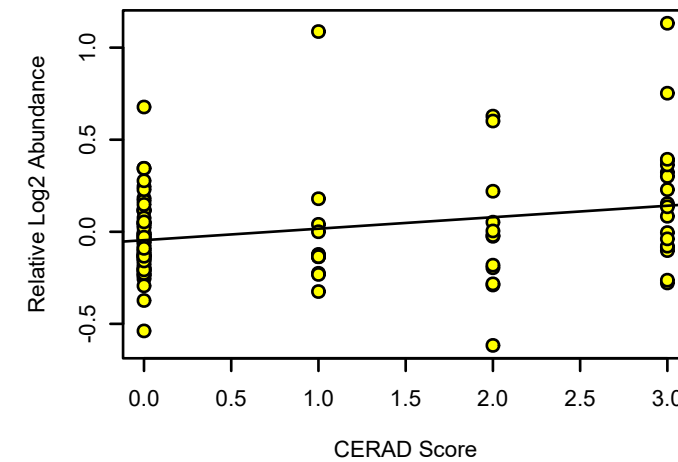

**UQCRB UPenn Mixed PRM**  
M3 brown MEGA module member  
K-W ANOVA p: 0.0053

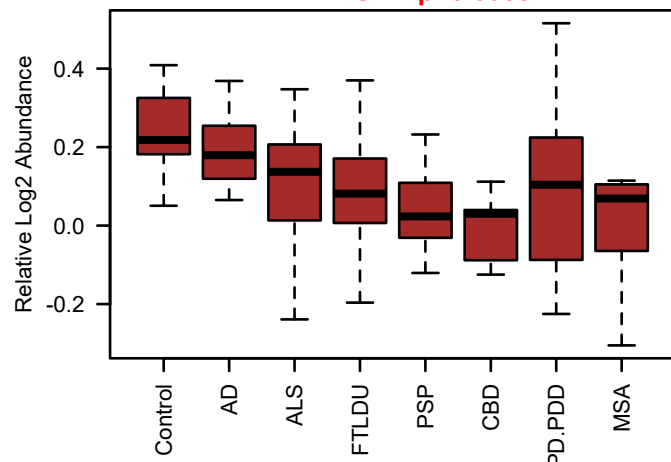

**UQCRB UPenn Mixed PRM**  
K-W ANOVA p: 0.00054

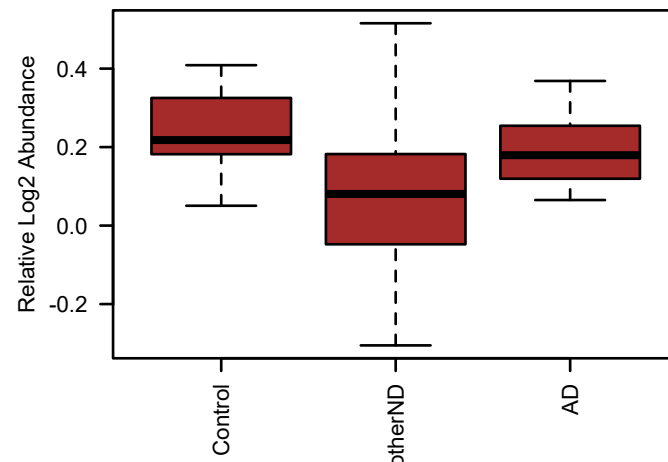

**bicor=-0.013, p=0.91**  
**cor=0.019, p=0.86**

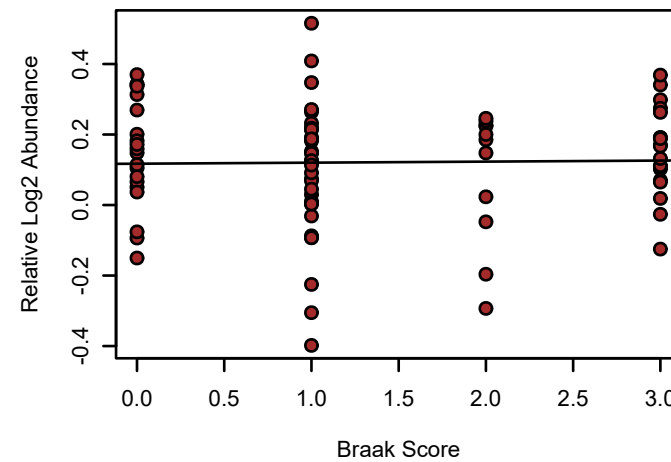

**bicor=0.088, p=0.39**  
**cor=0.062, p=0.54**

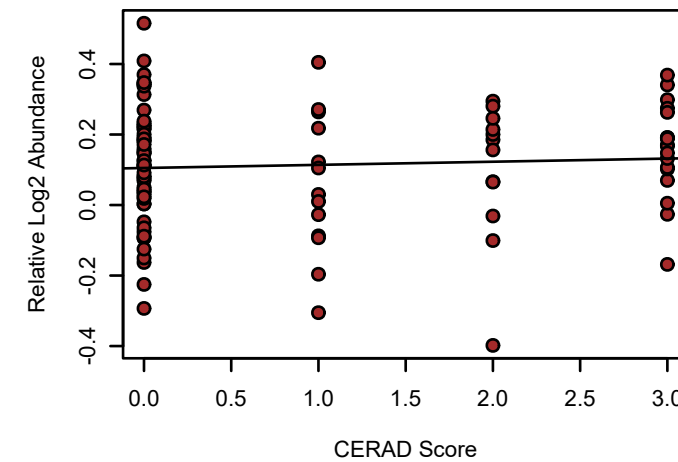

**AKR1B1 UPenn Mixed PRM**  
M4 yellow MEGA module member  
K-W ANOVA p: 5.5e-06

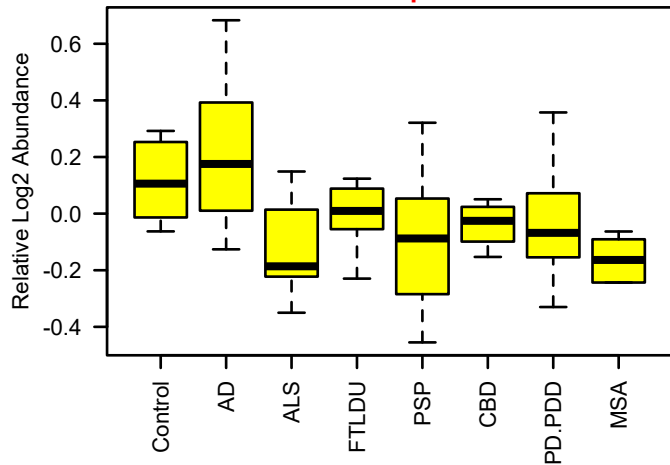

**AKR1B1 UPenn Mixed PRM**  
K-W ANOVA p: 2.6e-07

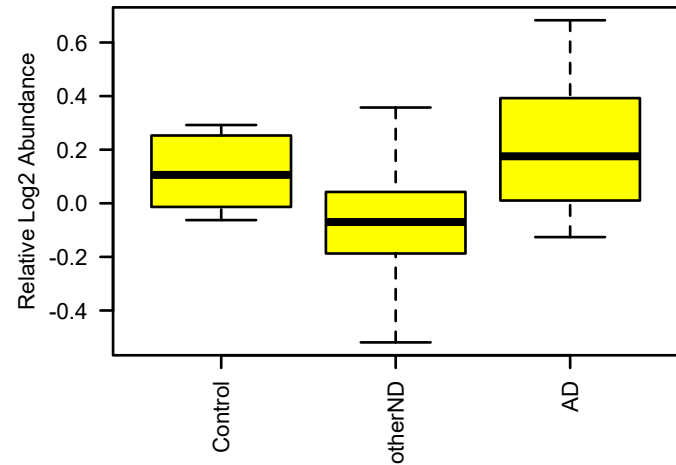

**bicor=0.24, p=0.031**  
**cor=0.27, p=0.013**

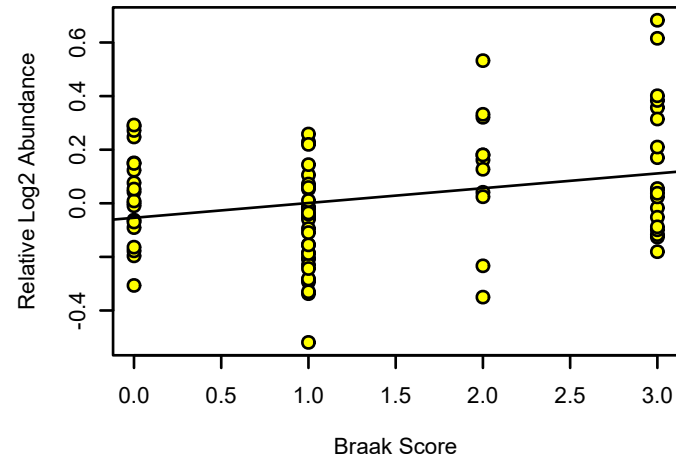

**bicor=0.29, p=0.003**  
**cor=0.33, p=8e-04**

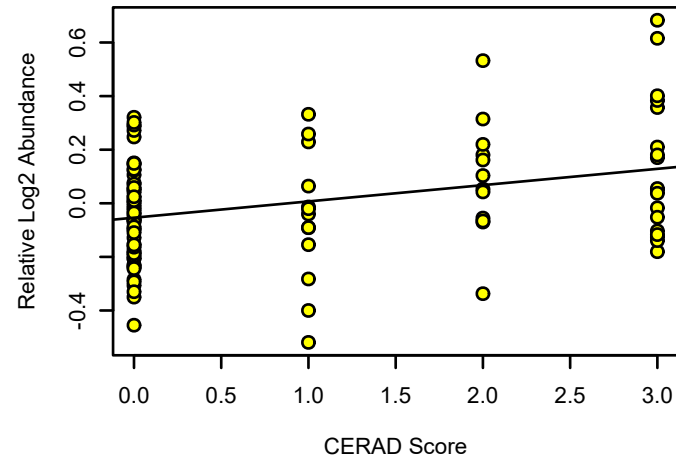

**PGAM2 UPenn Mixed PRM**  
M4 yellow MEGA module member  
K-W ANOVA p: 1.2e-06

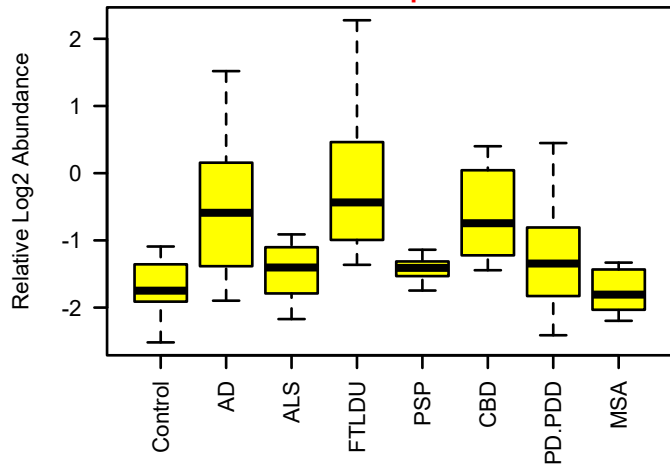

**PGAM2 UPenn Mixed PRM**  
K-W ANOVA p: 0.00018

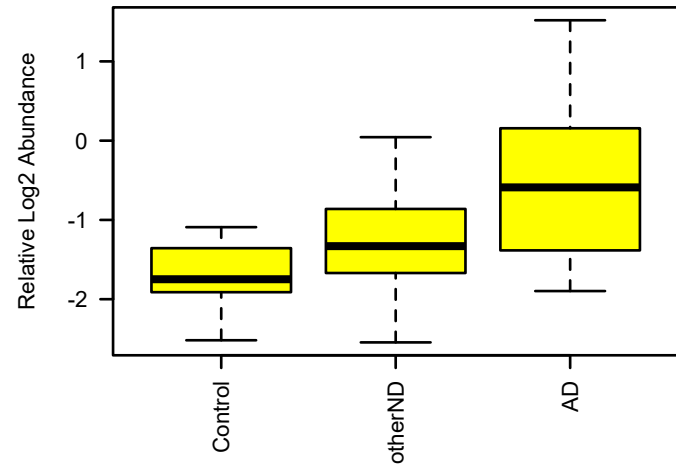

**bicor=0.43, p=3.9e-05**  
**cor=0.41, p=0.00011**

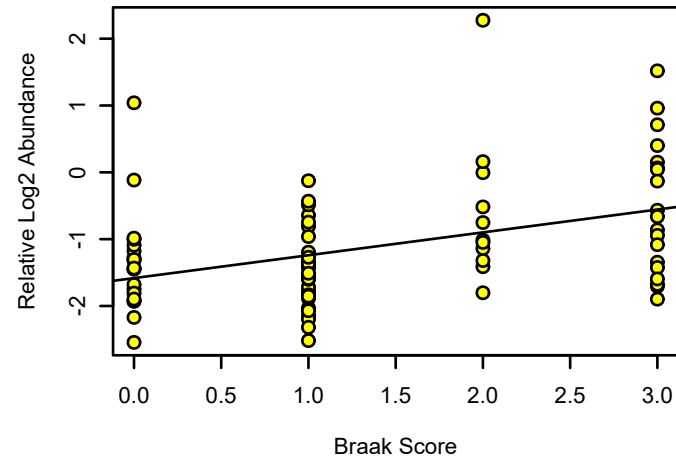

**bicor=0.23, p=0.02**  
**cor=0.25, p=0.012**

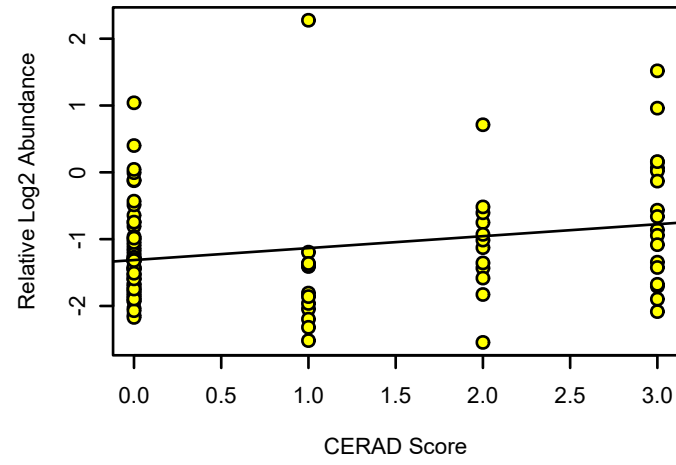

**ATP2A2 UPenn Mixed PRM**  
M1 turquoise MEGA module member  
K-W ANOVA p: 0.01

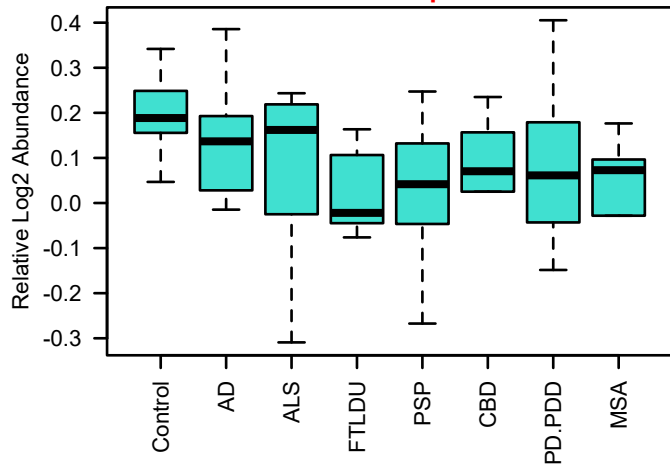

**ATP2A2 UPenn Mixed PRM**  
K-W ANOVA p: 0.00043

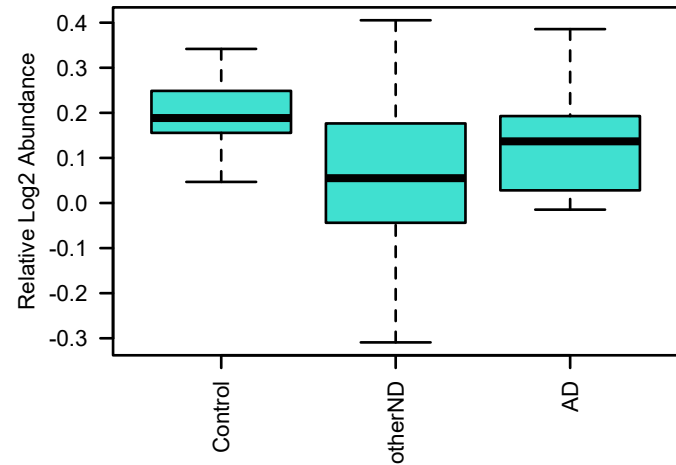

**bicor=-0.13, p=0.26**  
**cor=-0.085, p=0.44**

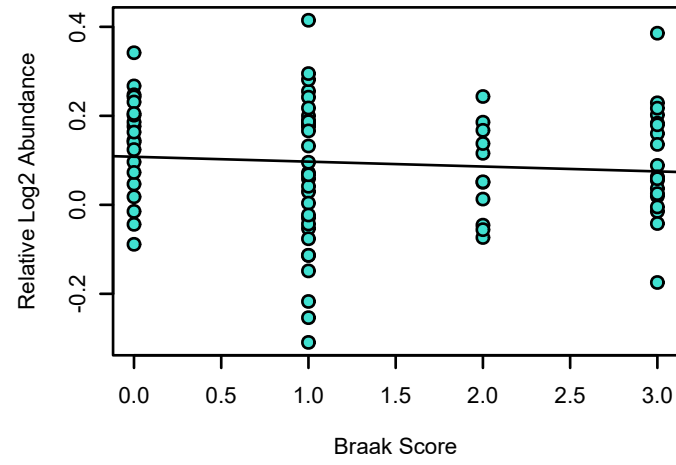

**bicor=0.082, p=0.42**  
**cor=0.093, p=0.36**

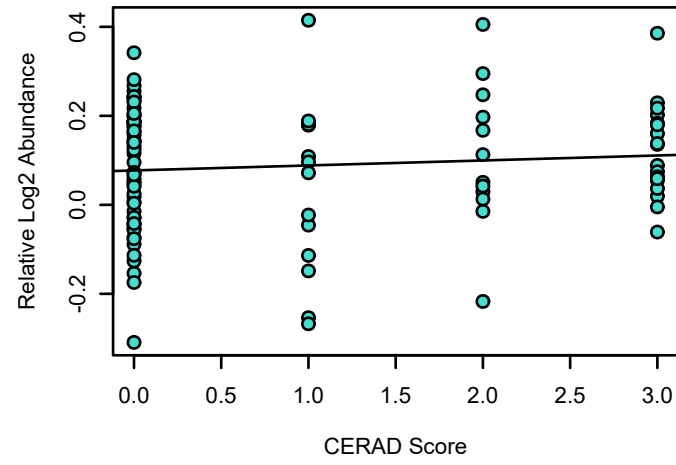

**CPE UPenn Mixed PRM**  
NA grey MEGA module member  
K-W ANOVA p: 0.01

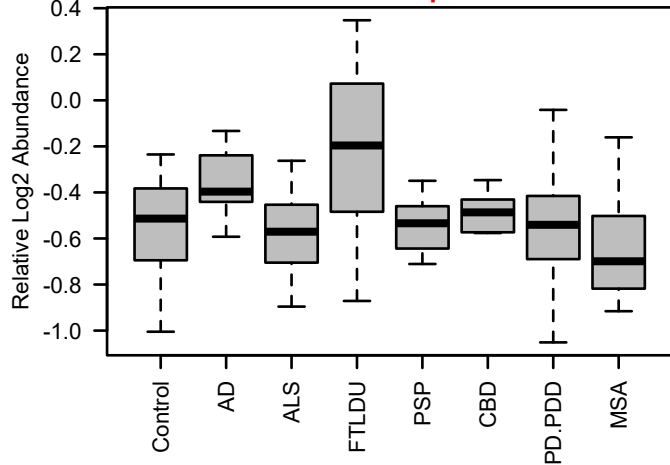

**CPE UPenn Mixed PRM**  
K-W ANOVA p: 0.15

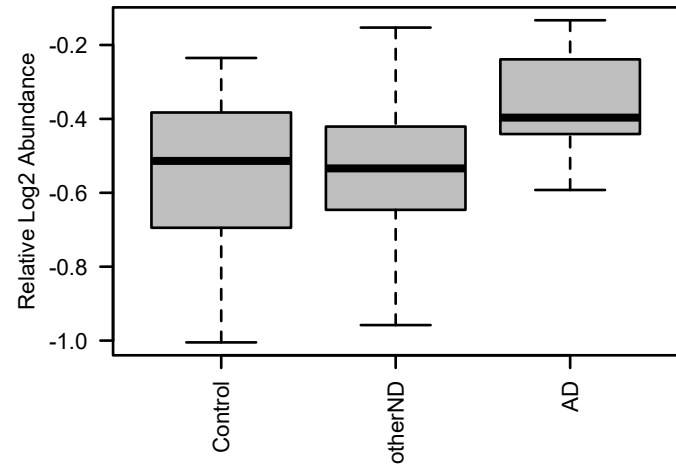

**bicor=0.13, p=0.25**  
**cor=0.16, p=0.15**

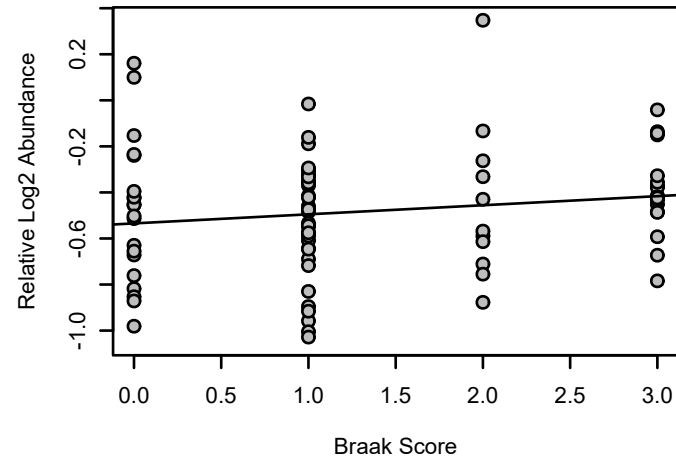

**bicor=0.26, p=0.0097**  
**cor=0.24, p=0.016**

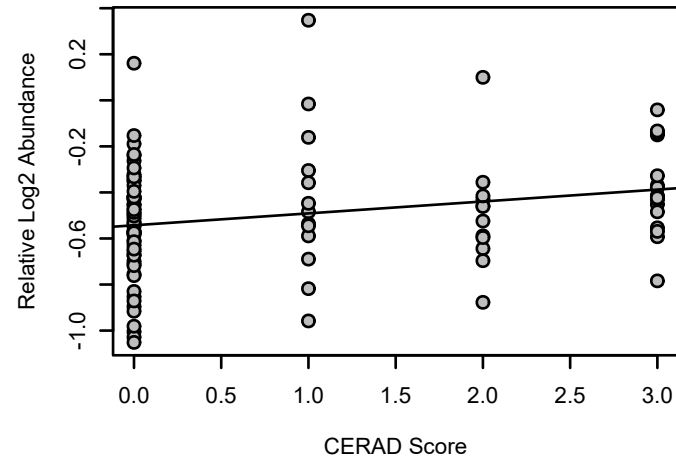

**GOT1 UPenn Mixed PRM**  
NA grey MEGA module member  
K-W ANOVA p: 2e-04

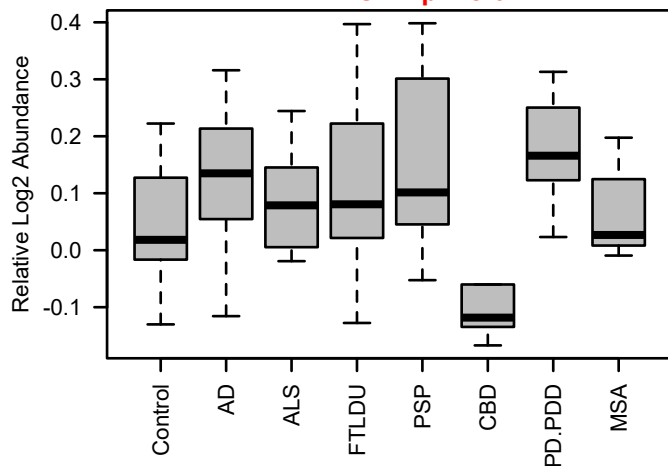

**GOT1 UPenn Mixed PRM**  
K-W ANOVA p: 0.06

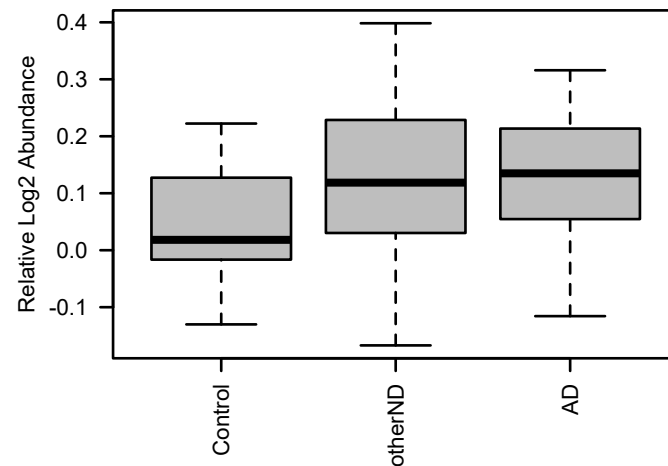

**bicor=0.088, p=0.43**  
**cor=0.081, p=0.46**

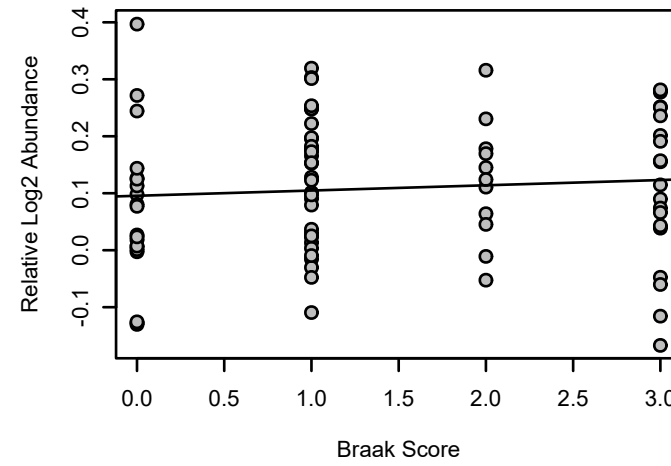

**bicor=0.21, p=0.037**  
**cor=0.2, p=0.046**

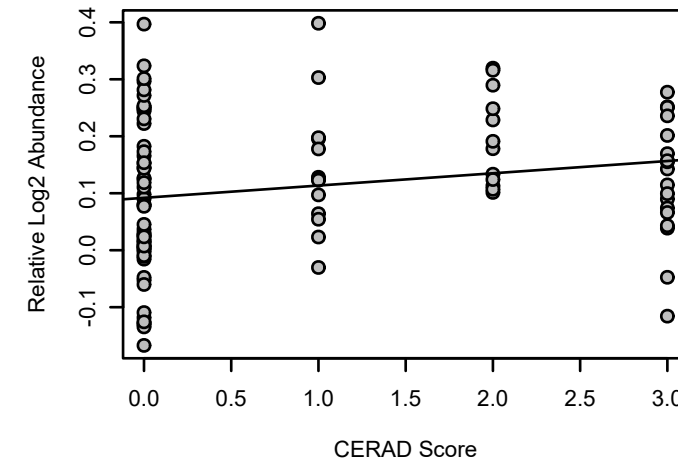

**SYN1 UPenn Mixed PRM**  
M1 turquoise MEGA module member  
K-W ANOVA p: 0.91

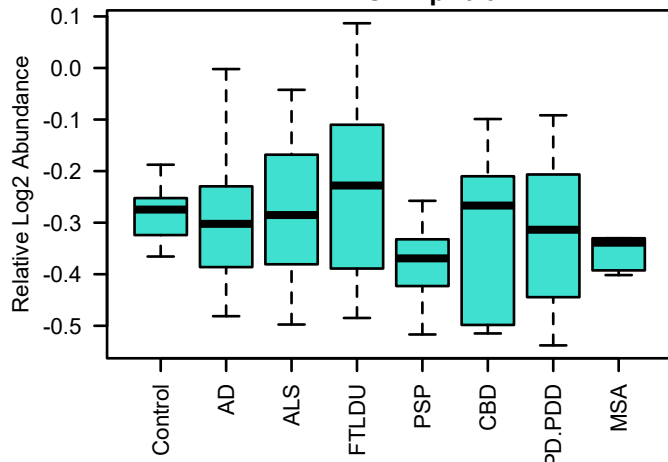

**SYN1 UPenn Mixed PRM**  
K-W ANOVA p: 0.81

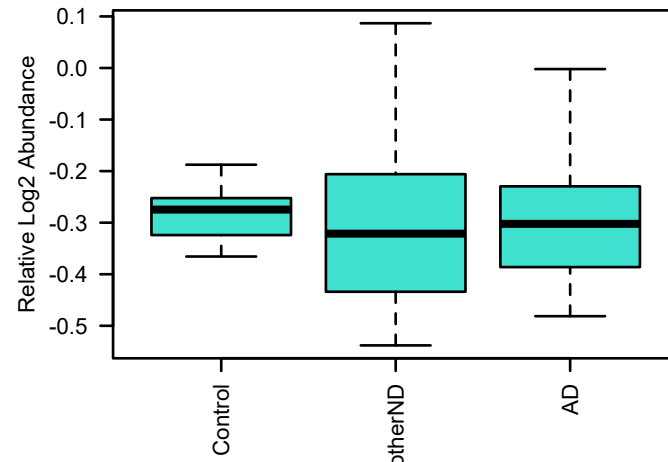

**bicor=-0.019, p=0.87**  
**cor=-0.0043, p=0.97**

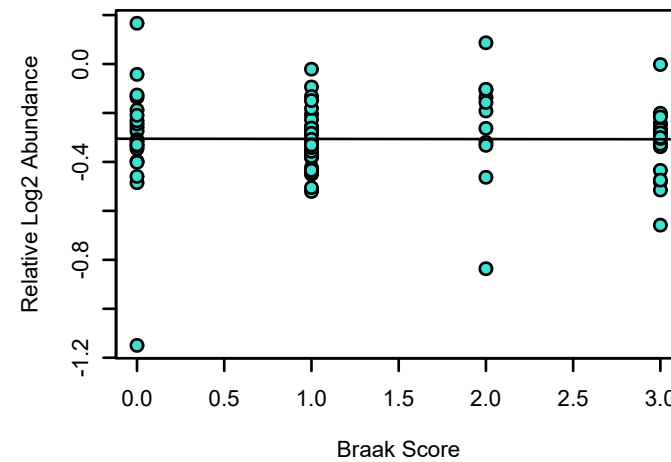

**bicor=0.099, p=0.33**  
**cor=0.099, p=0.33**

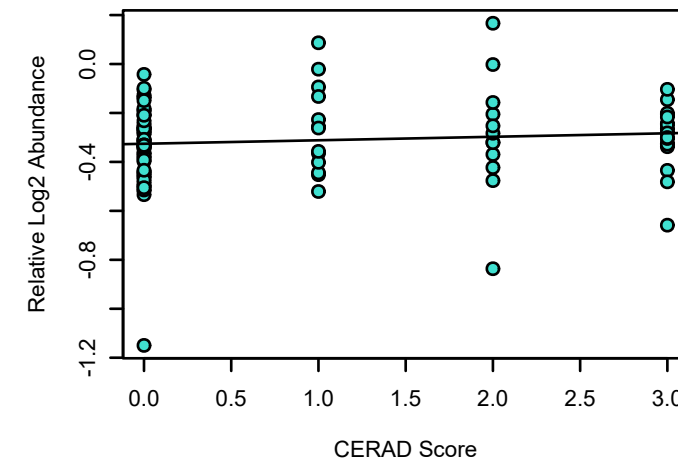

**CAPN2 UPenn Mixed PRM**  
M4 yellow MEGA module member  
K-W ANOVA p: 1.5e-08

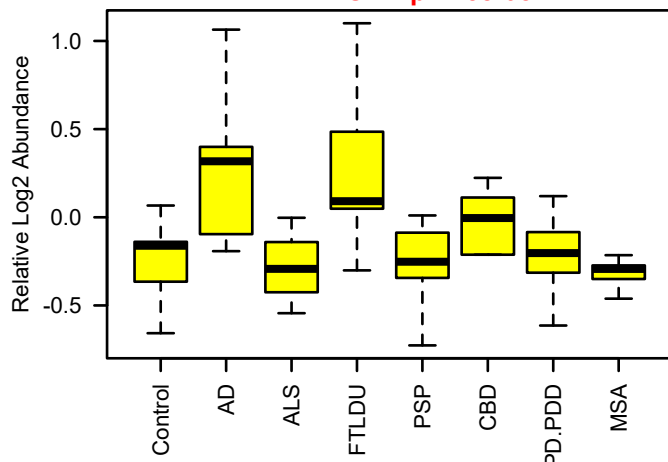

**CAPN2 UPenn Mixed PRM**  
K-W ANOVA p: 9.1e-07

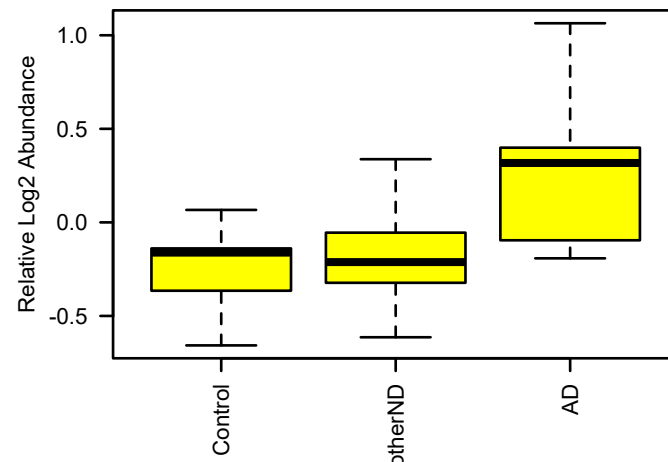

**bicor=0.49, p=2.9e-06**  
**cor=0.46, p=1.1e-05**

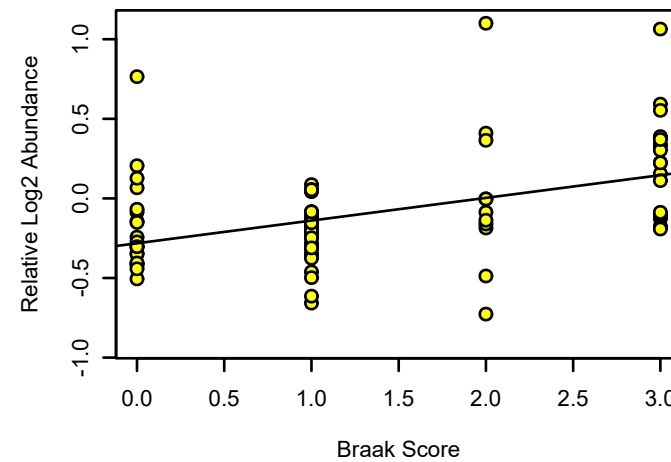

**bicor=0.39, p=7.6e-05**  
**cor=0.39, p=6e-05**

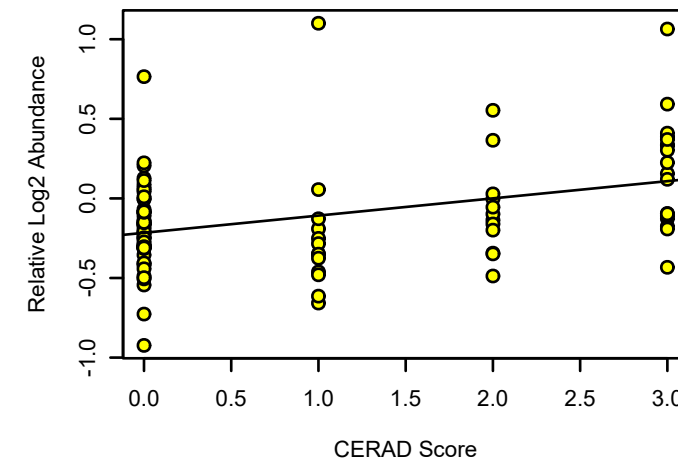

**GAP43 UPenn Mixed PRM**  
M6 red MEGA module member  
K-W ANOVA p: 0.23

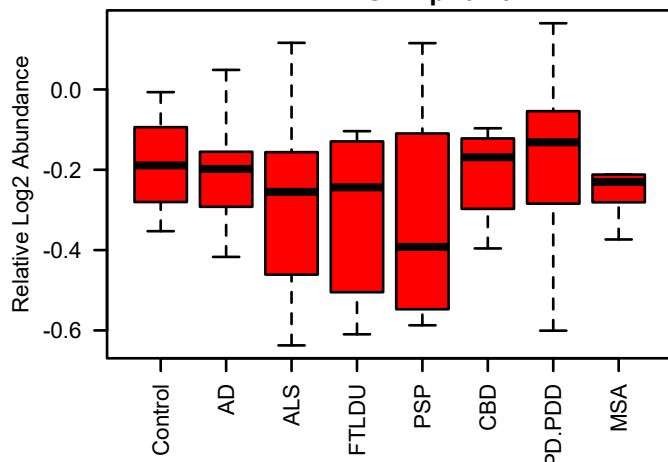

**GAP43 UPenn Mixed PRM**  
K-W ANOVA p: 0.77

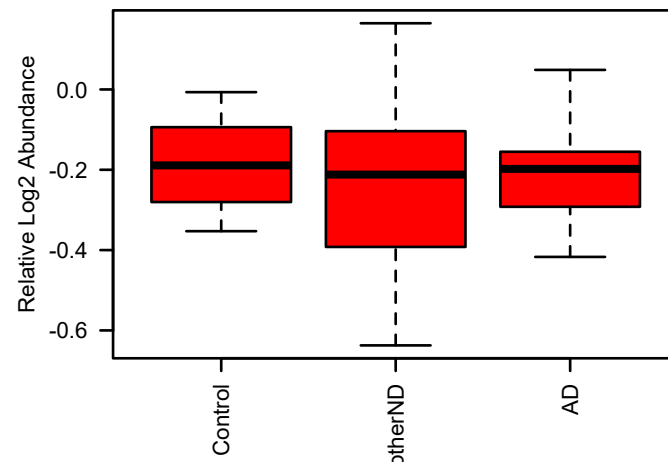

**bicor=-0.093, p=0.4**  
**cor=-0.0021, p=0.98**

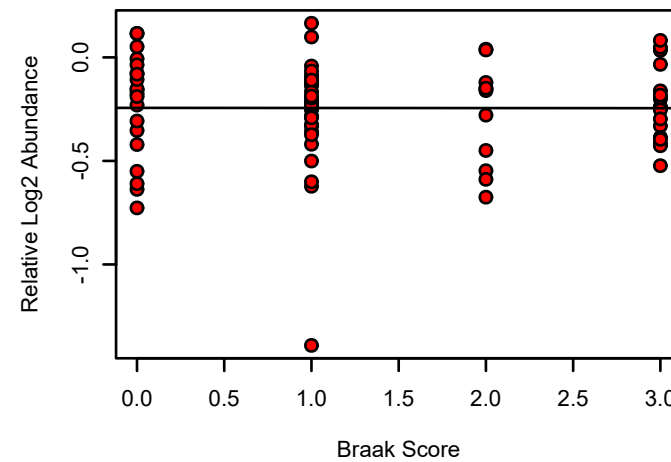

**bicor=0.15, p=0.15**  
**cor=0.086, p=0.39**

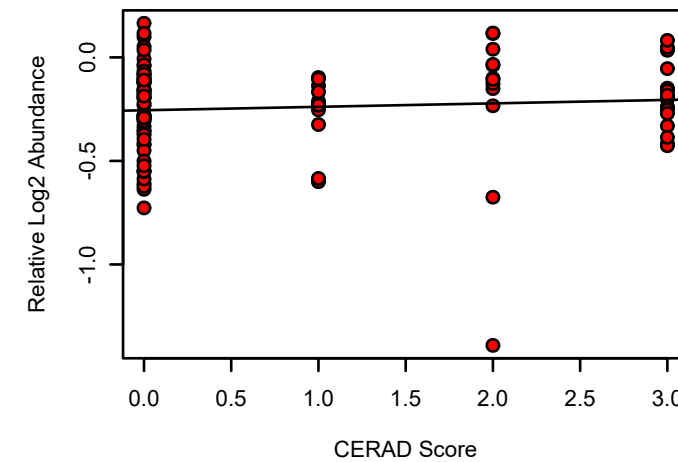



**TCP1 UPenn Mixed PRM**  
**M11 greenyellow MEGA module member**  
**K-W ANOVA p: 0.00071**

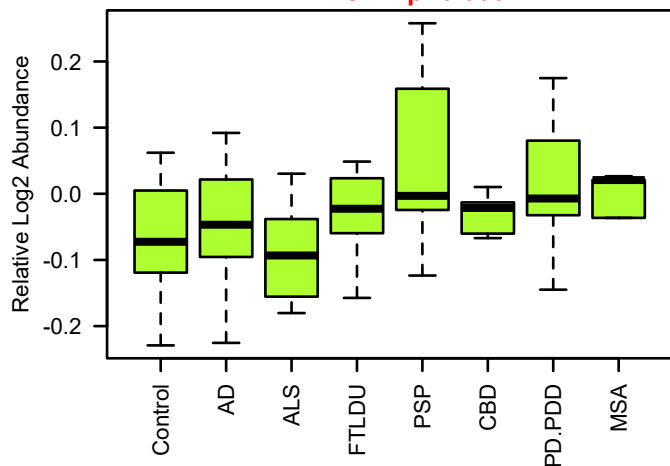

**TCP1 UPenn Mixed PRM**  
**K-W ANOVA p: 0.047**

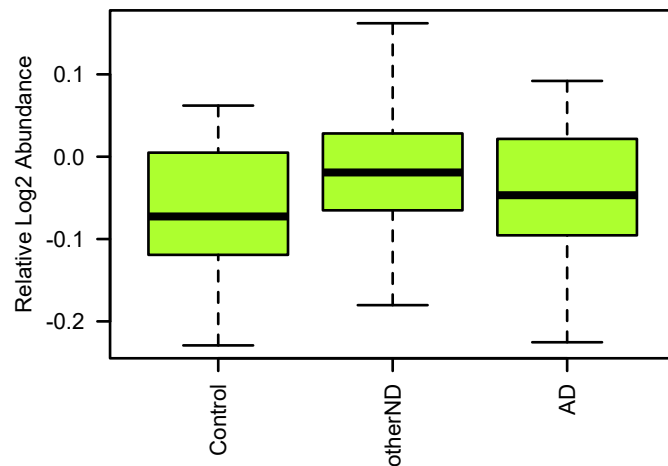

**bicor=0.1, p=0.36**  
**cor=0.077, p=0.49**

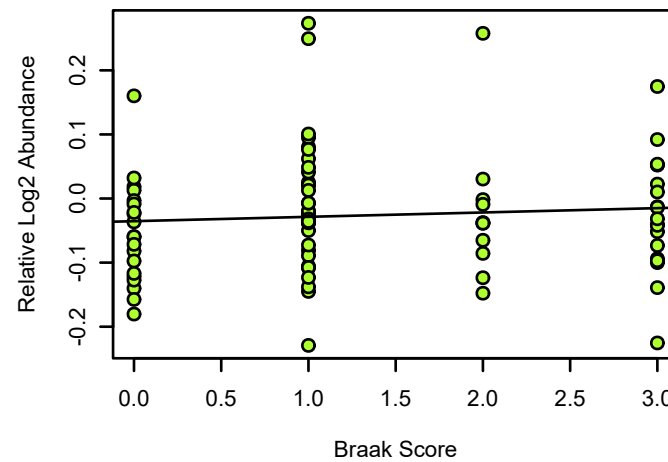

**bicor=0.11, p=0.3**  
**cor=0.066, p=0.51**

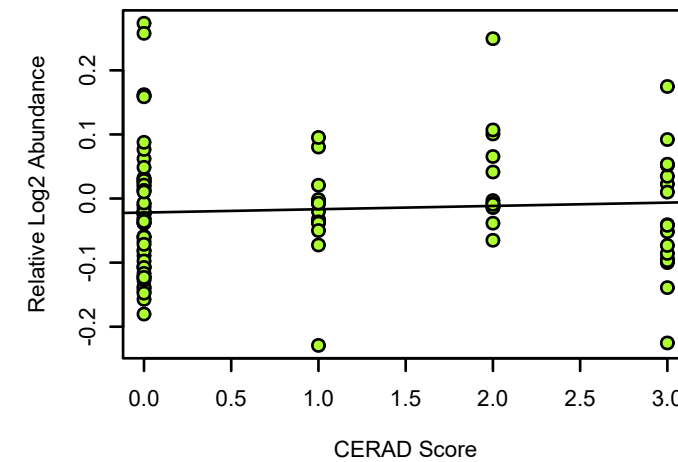

**NCL UPenn Mixed PRM**  
**M10 purple MEGA module member**  
**K-W ANOVA p: 1.8e-05**

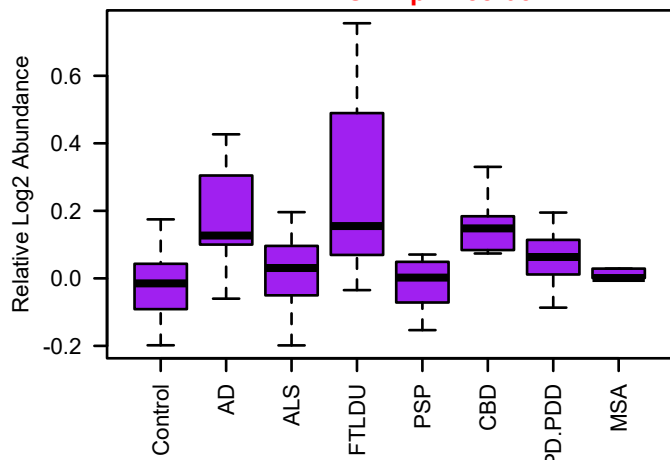

**NCL UPenn Mixed PRM**  
**K-W ANOVA p: 0.00087**

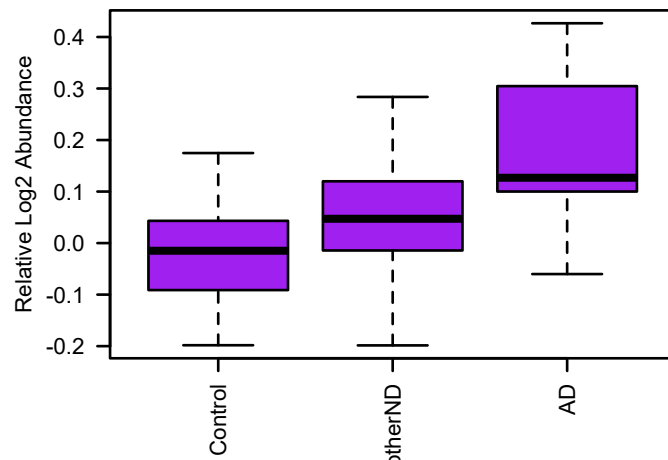

**bicor=0.4, p=0.00015**  
**cor=0.35, p=0.0011**

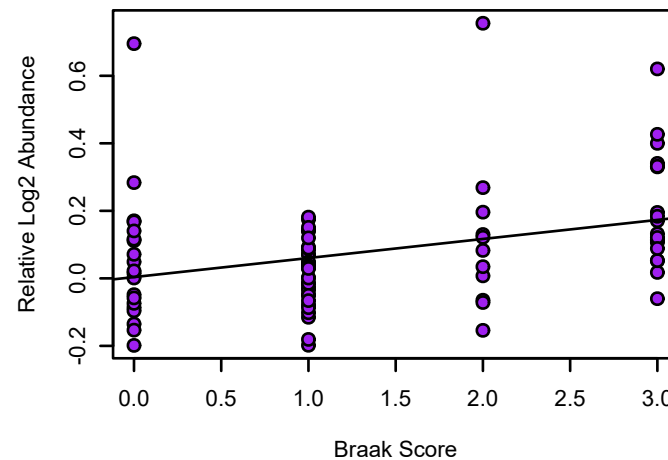

**bicor=0.22, p=0.027**  
**cor=0.2, p=0.046**

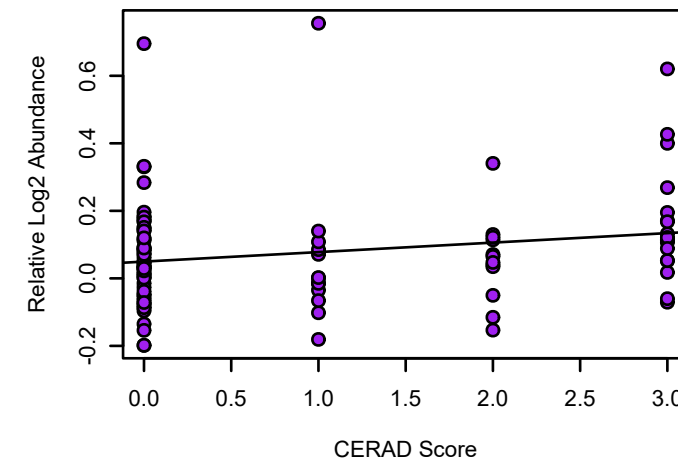

**NDUFV2 UPenn Mixed PRM**  
**M3 brown MEGA module member**  
**K-W ANOVA p: 7.8e-05**

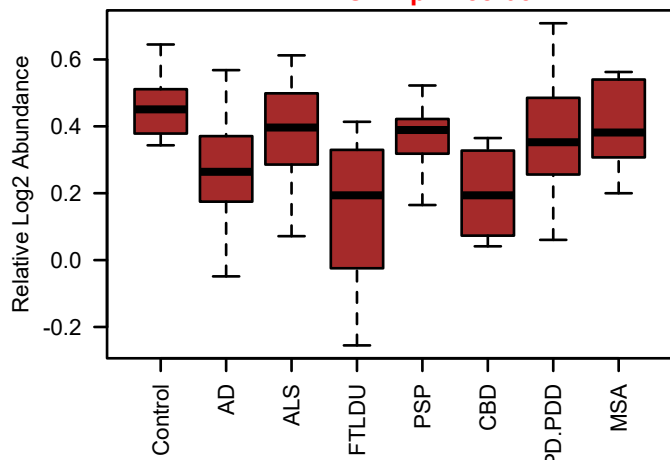

**NDUFV2 UPenn Mixed PRM**  
**K-W ANOVA p: 0.0025**

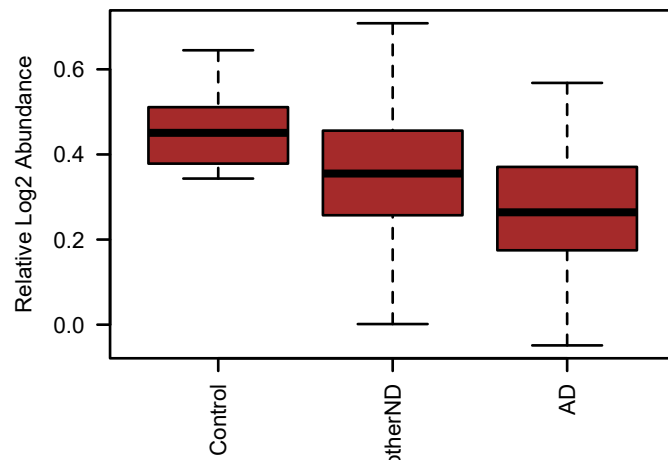

**bicor=-0.31, p=0.0036**  
**cor=-0.29, p=0.0075**

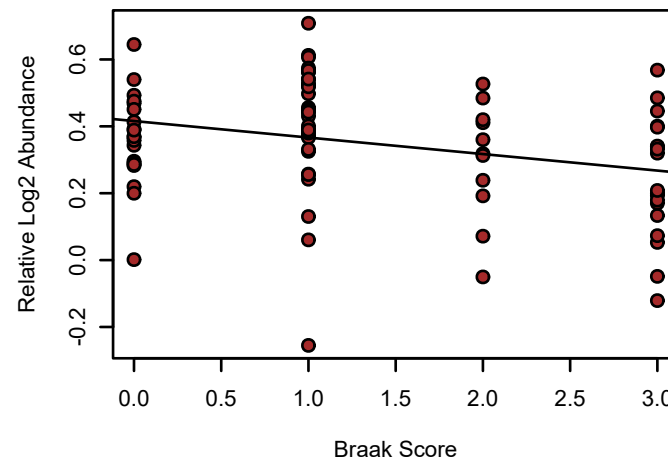

**bicor=-0.23, p=0.02**  
**cor=-0.22, p=0.028**

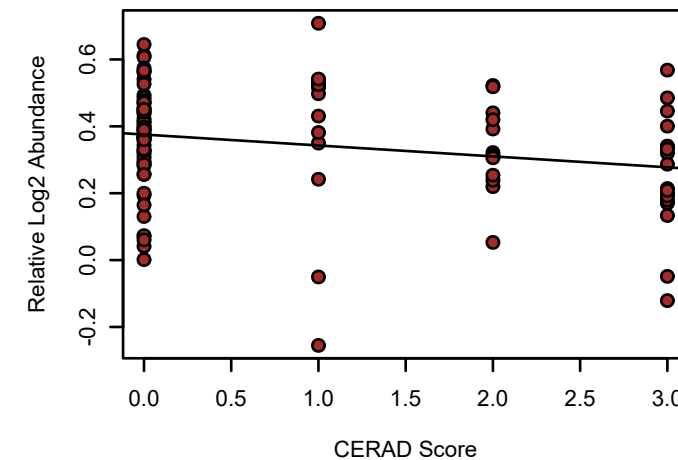

**ATP2B1 UPenn Mixed PRM**  
**M1 turquoise MEGA module member**  
**K-W ANOVA p: 0.0075**

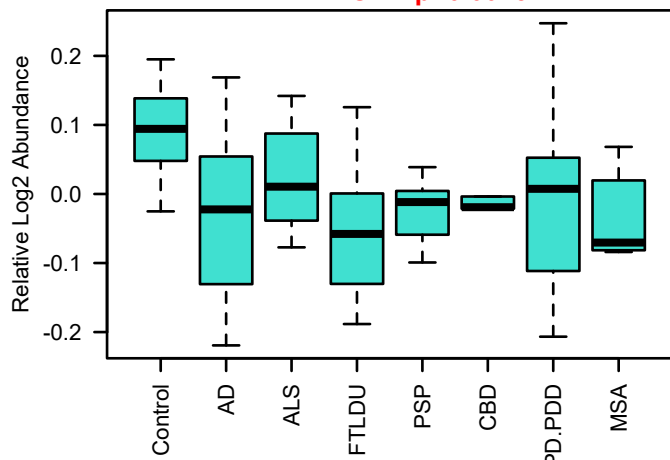

**ATP2B1 UPenn Mixed PRM**  
**K-W ANOVA p: 0.00066**

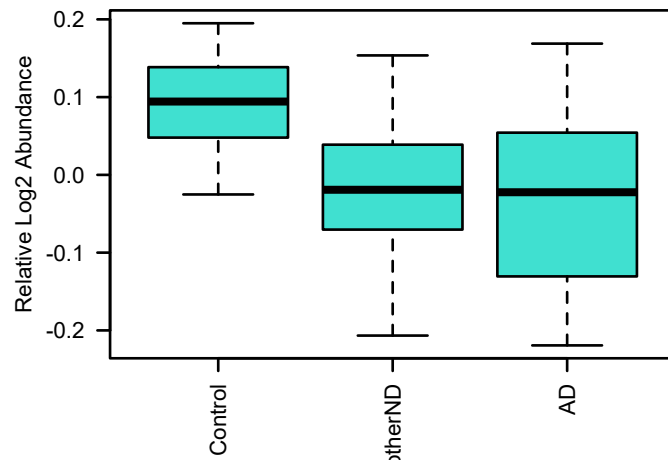

**bicor=-0.21, p=0.051**  
**cor=-0.22, p=0.044**

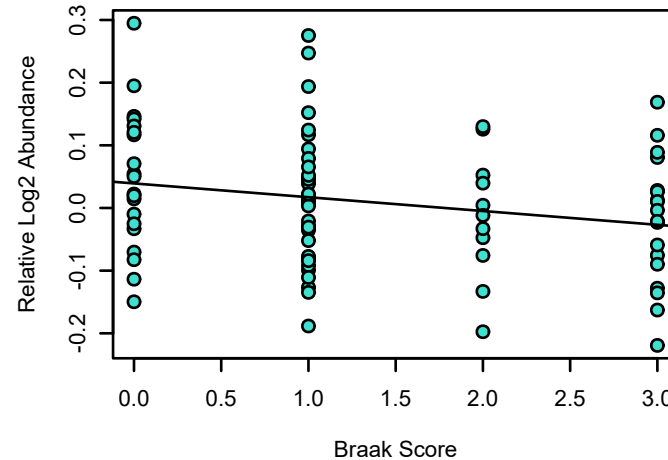

**bicor=-0.21, p=0.038**  
**cor=-0.22, p=0.028**

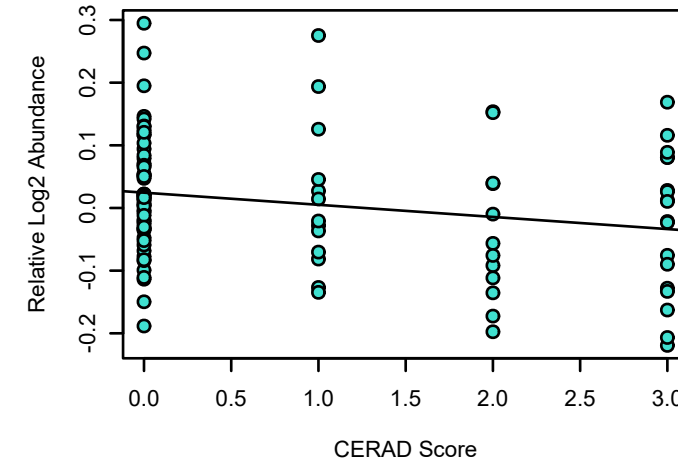

**RAB3A UPenn Mixed PRM**  
M1 turquoise MEGA module member  
K-W ANOVA p: 7.5e-05

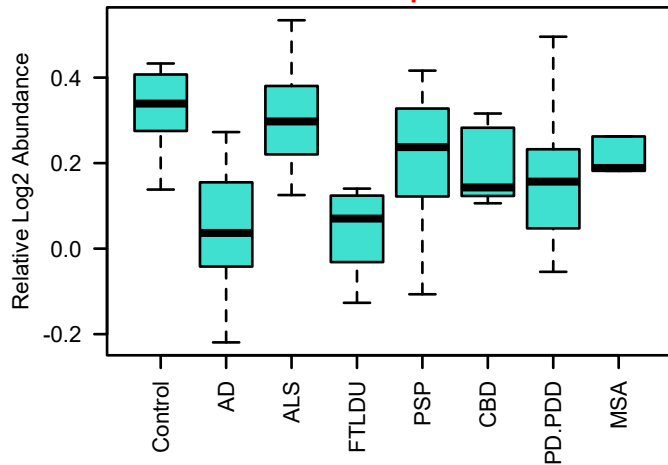

**RAB3A UPenn Mixed PRM**  
K-W ANOVA p: 4.4e-05

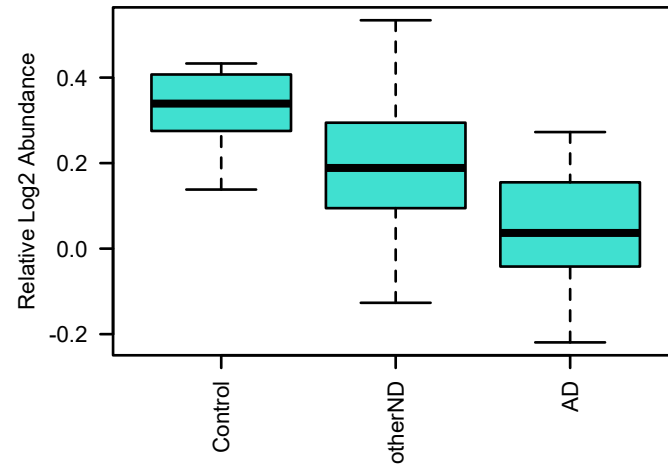

**bicor=-0.3, p=0.0049**  
**cor=-0.31, p=0.0041**

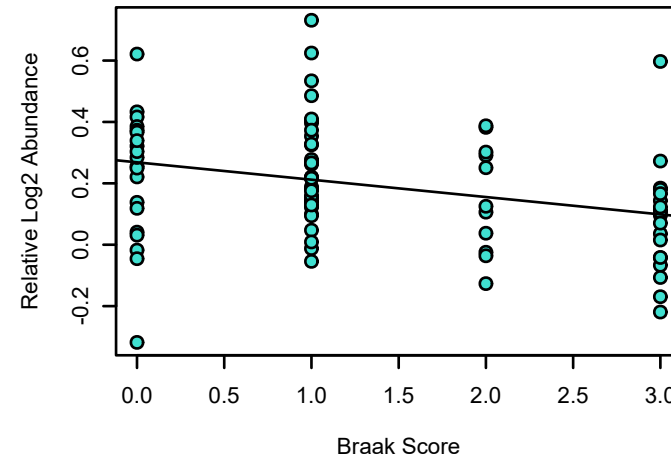

**bicor=-0.29, p=0.0033**  
**cor=-0.26, p=0.009**

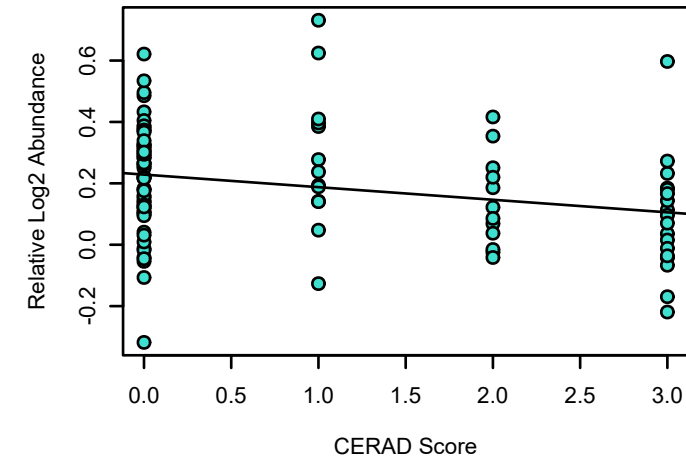

**MAG UPenn Mixed PRM**  
M2 blue MEGA module member  
K-W ANOVA p: 0.0067

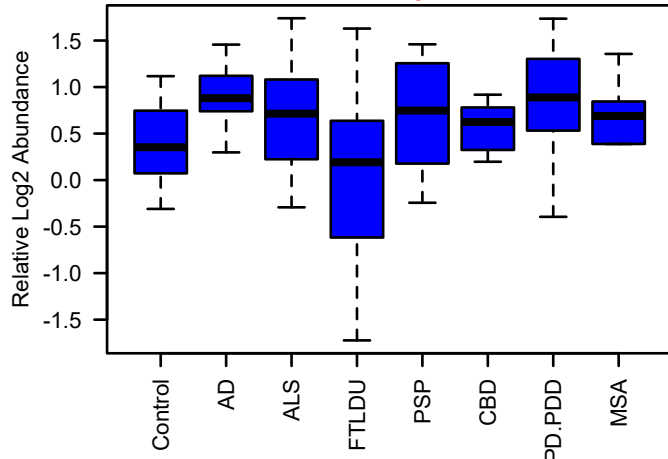

**MAG UPenn Mixed PRM**  
K-W ANOVA p: 0.042

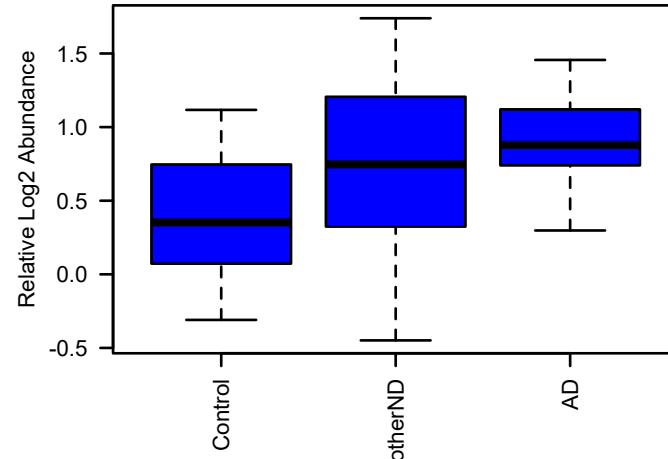

**bicor=0.21, p=0.05**  
**cor=0.23, p=0.035**

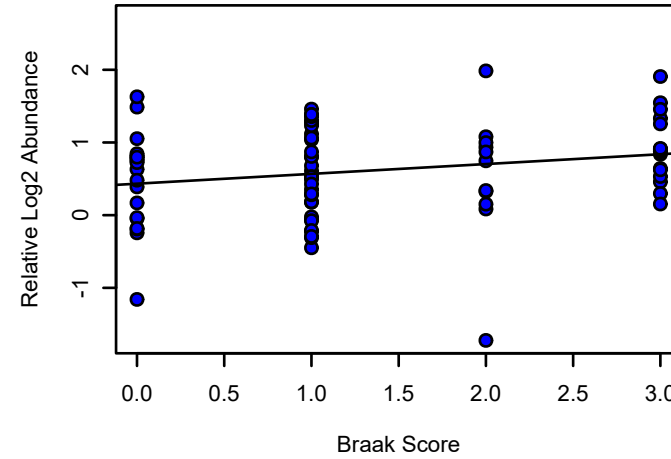

**bicor=0.18, p=0.075**  
**cor=0.17, p=0.091**

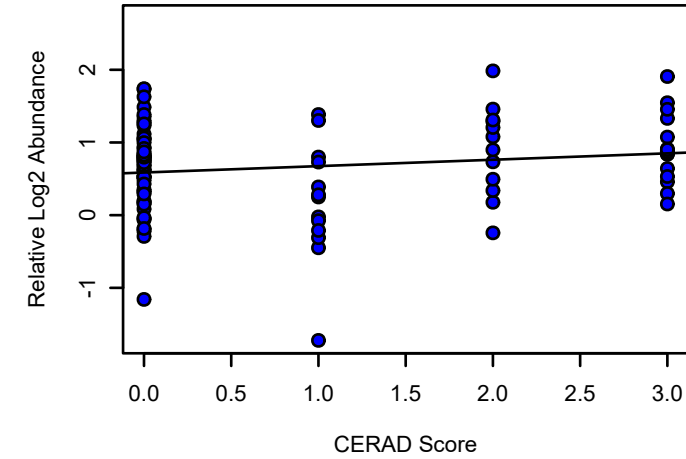

**ATP6V1B2 UPenn Mixed PRM**  
M1 turquoise MEGA module member  
K-W ANOVA p: 0.052

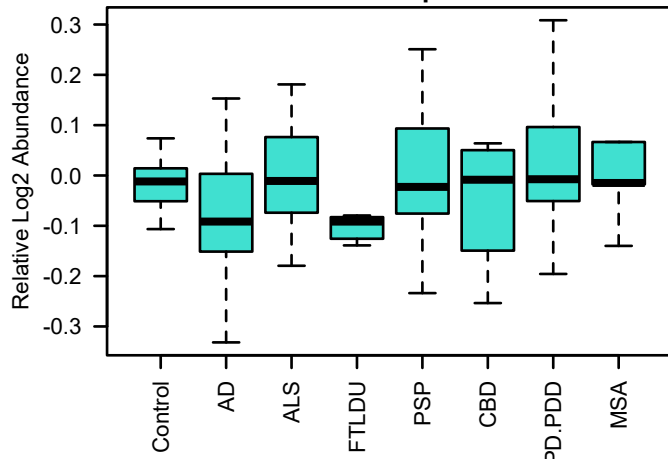

**ATP6V1B2 UPenn Mixed PRM**  
K-W ANOVA p: 0.11

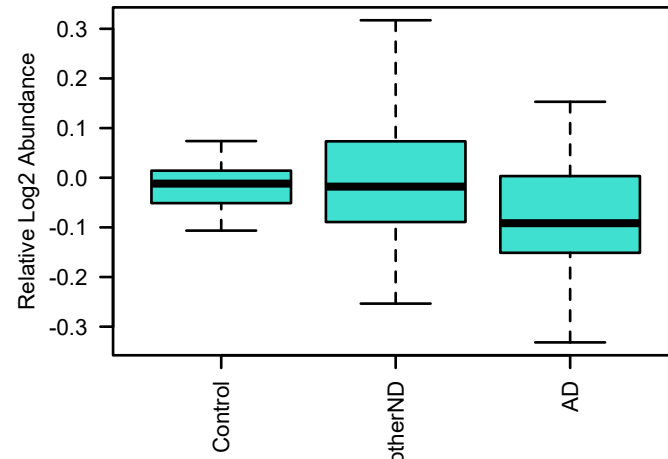

**bicor=-0.17, p=0.12**  
**cor=-0.17, p=0.12**

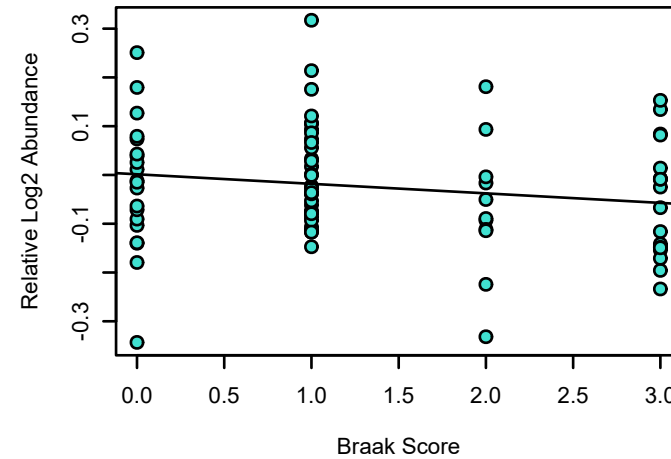

**bicor=-0.035, p=0.73**  
**cor=-0.02, p=0.84**

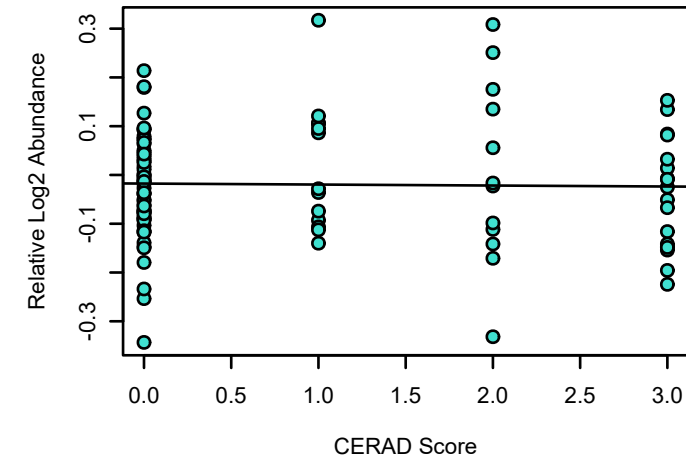

**ATP6V1C1 UPenn Mixed PRM**  
M1 turquoise MEGA module member  
K-W ANOVA p: 0.19

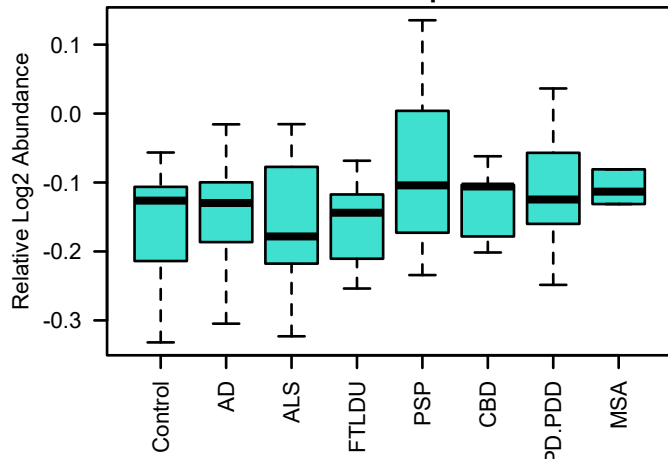

**ATP6V1C1 UPenn Mixed PRM**  
K-W ANOVA p: 0.32

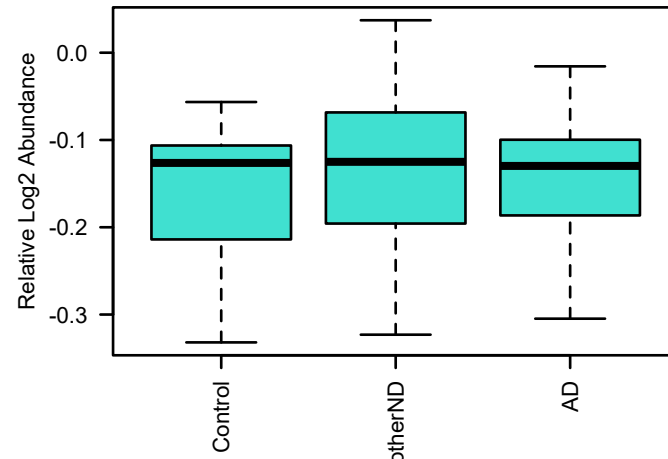

**bicor=0.014, p=0.9**  
**cor=0.0036, p=0.97**

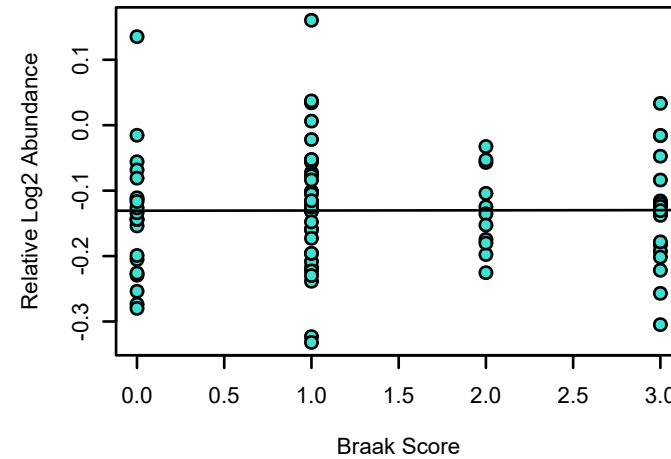

**bicor=-0.011, p=0.91**  
**cor=-0.0091, p=0.93**

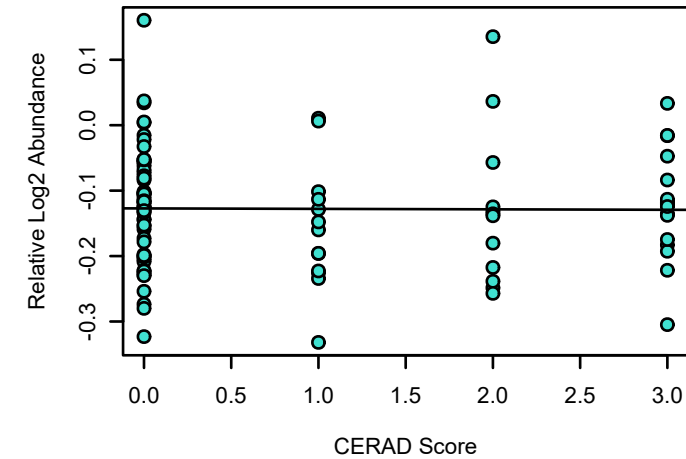

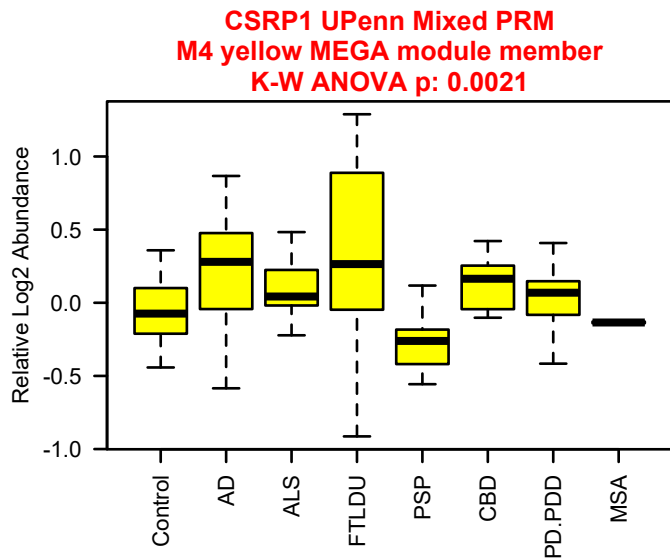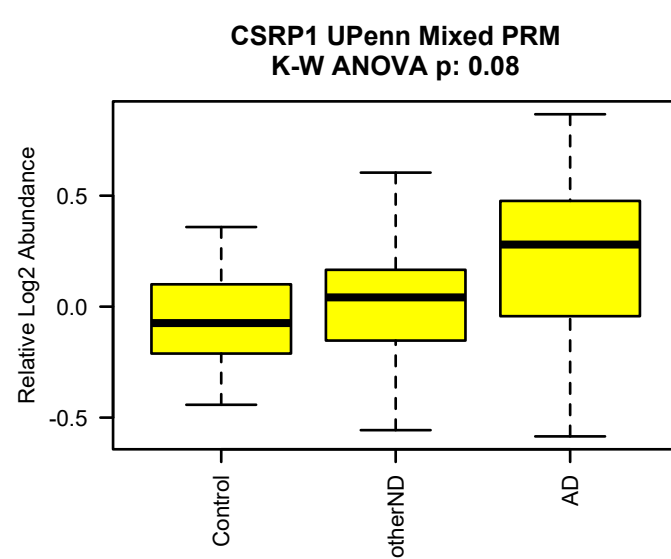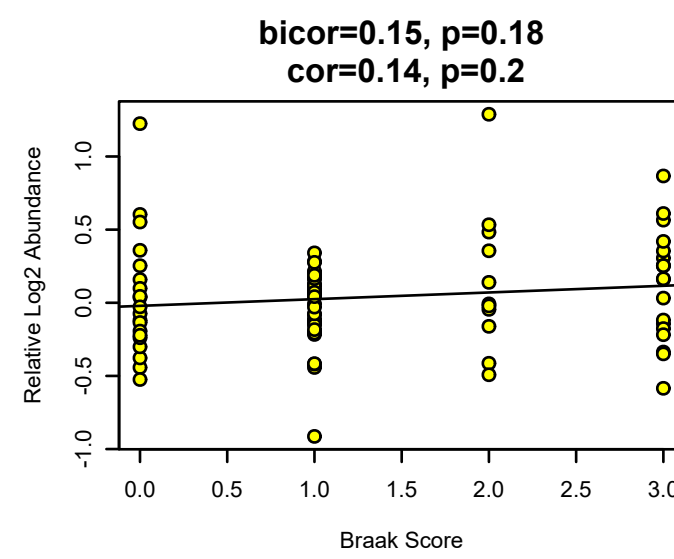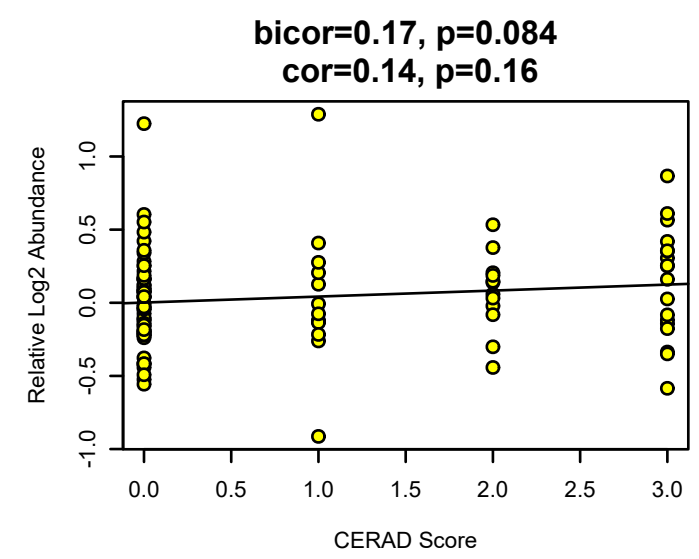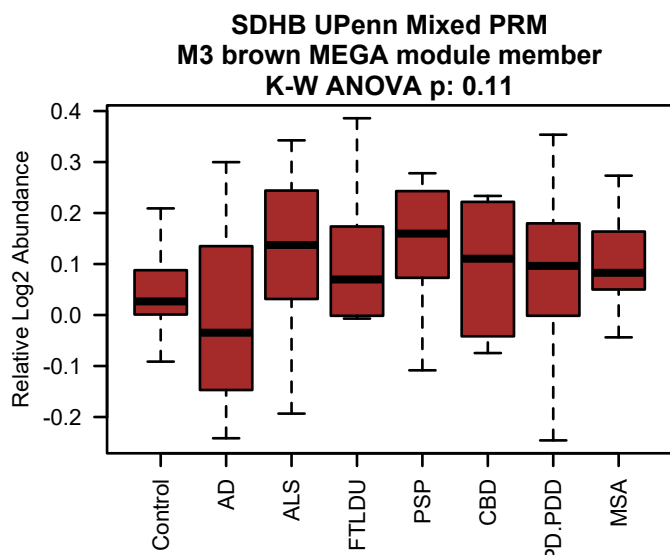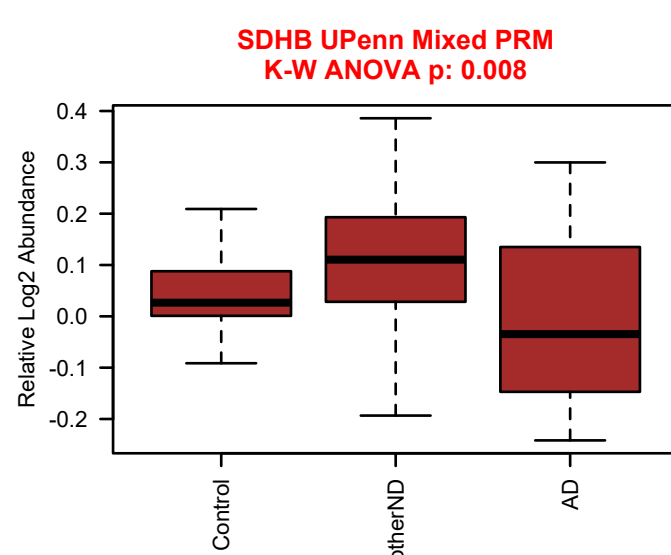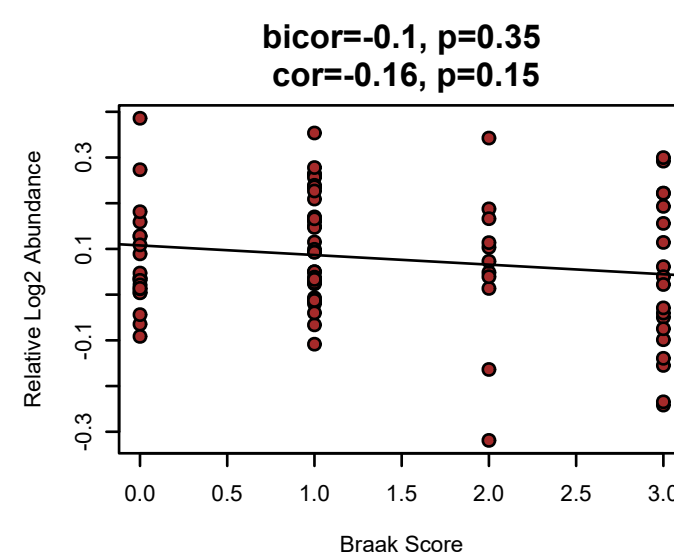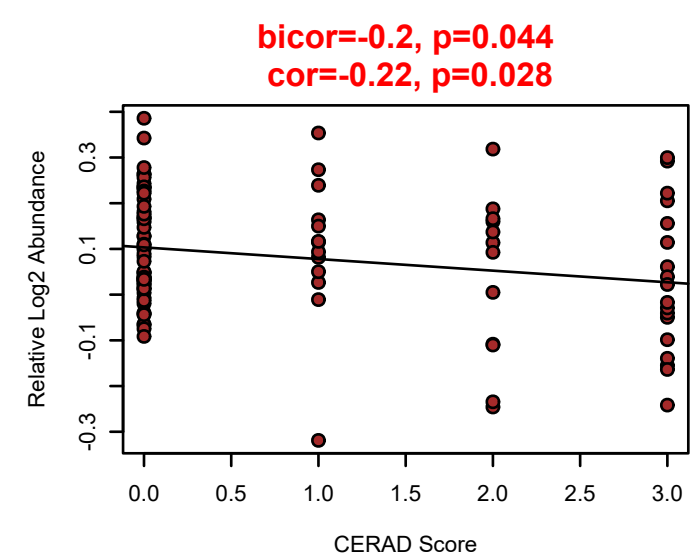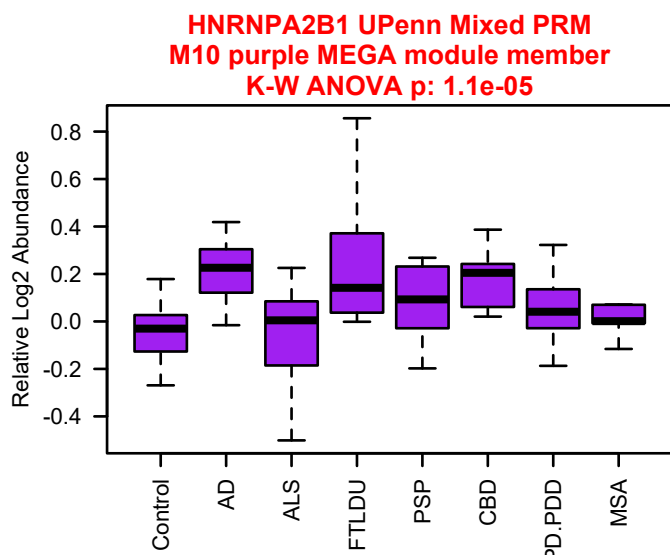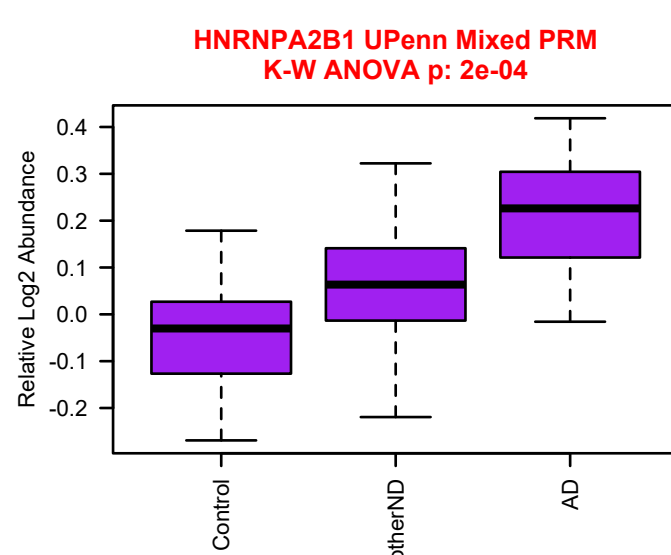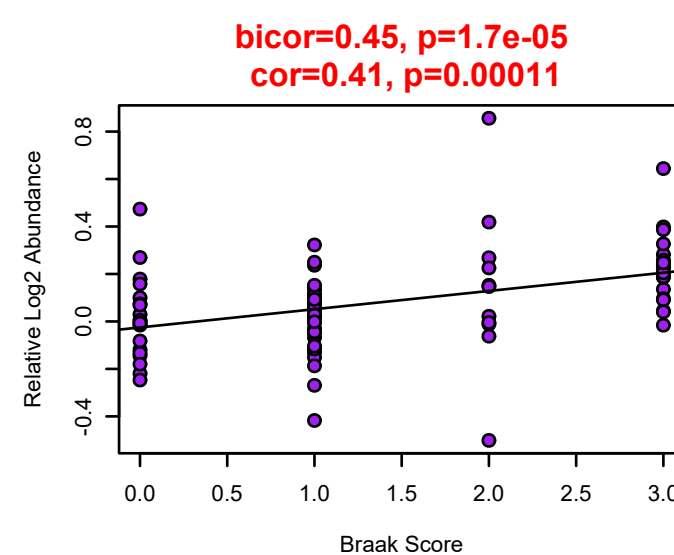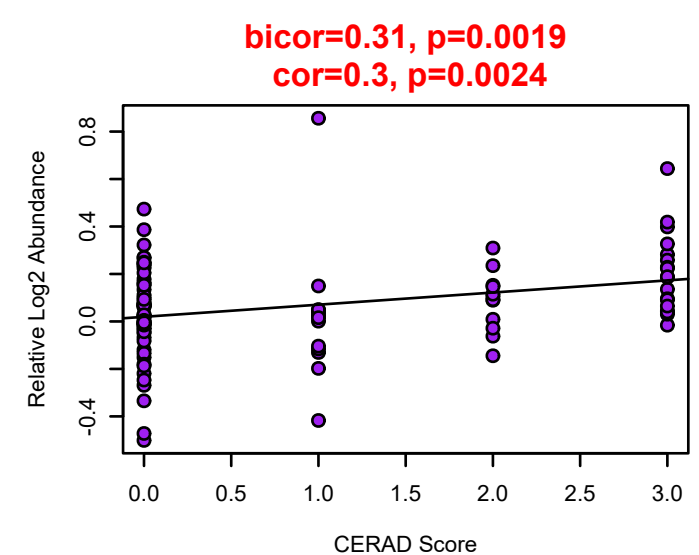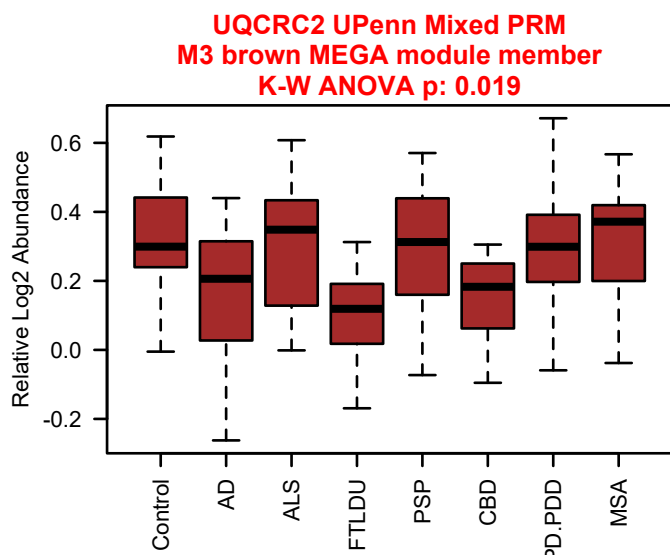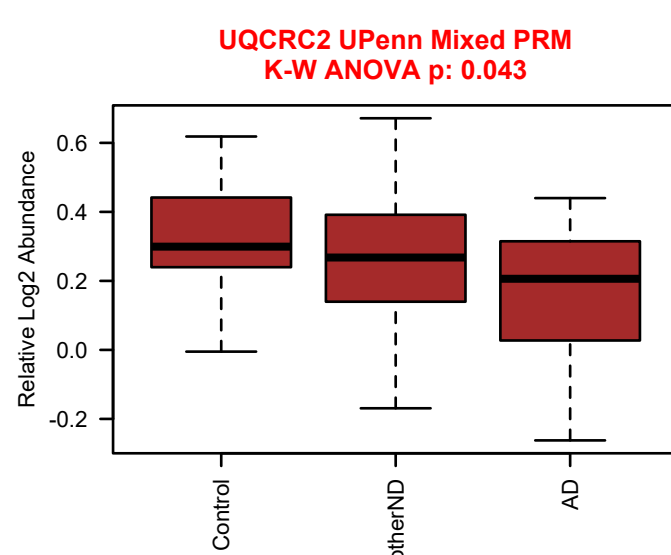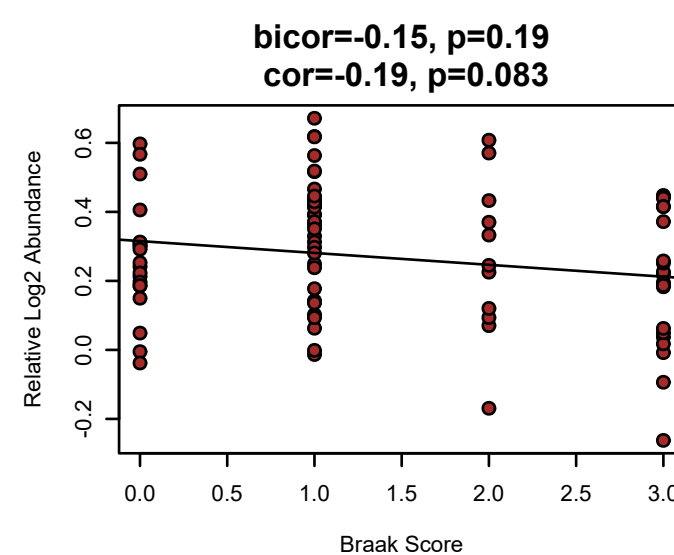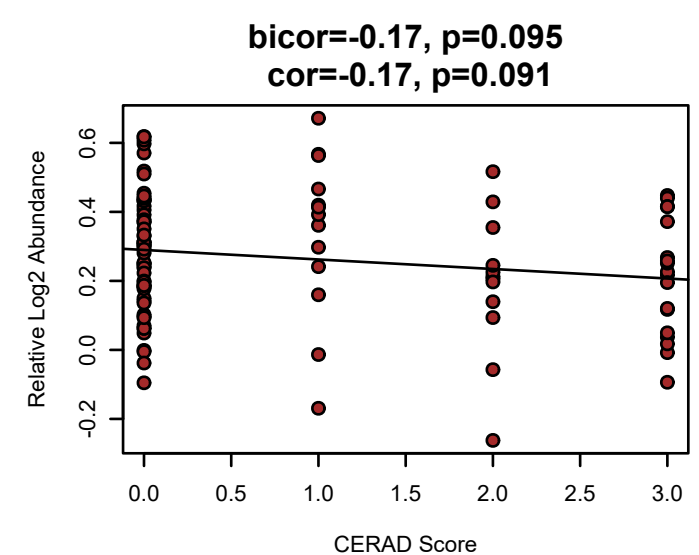

**SFPQ UPenn Mixed PRM**  
M10 purple MEGA module member  
K-W ANOVA p: 0.21

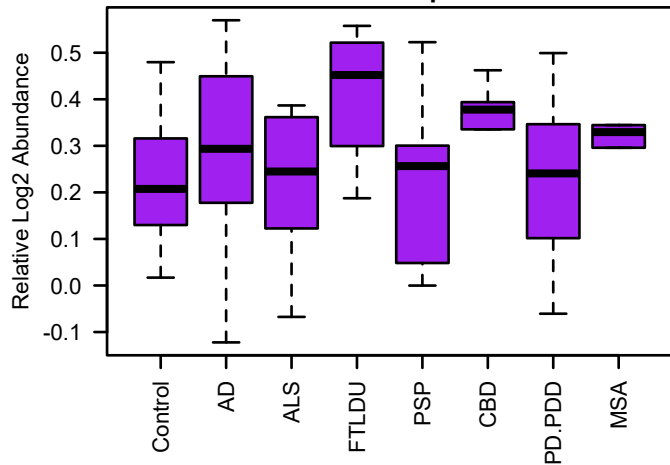

**SFPQ UPenn Mixed PRM**  
K-W ANOVA p: 0.9

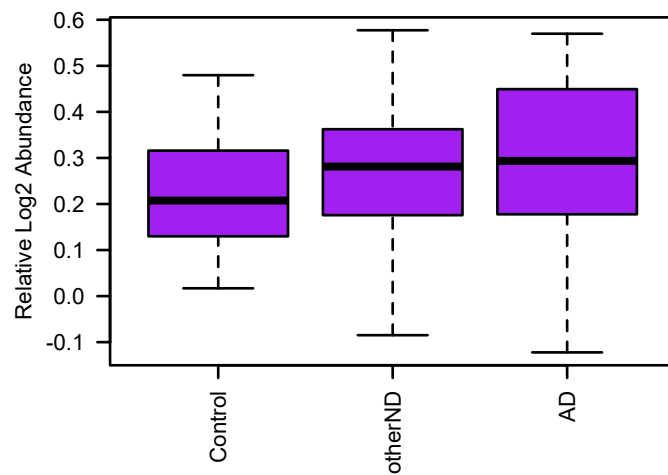

**bicor=0.14, p=0.22**  
**cor=0.13, p=0.24**

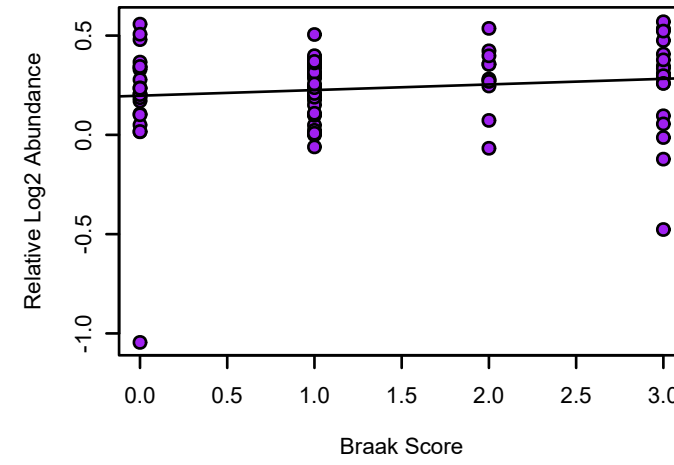

**bicor=0.033, p=0.75**  
**cor=0.006, p=0.95**

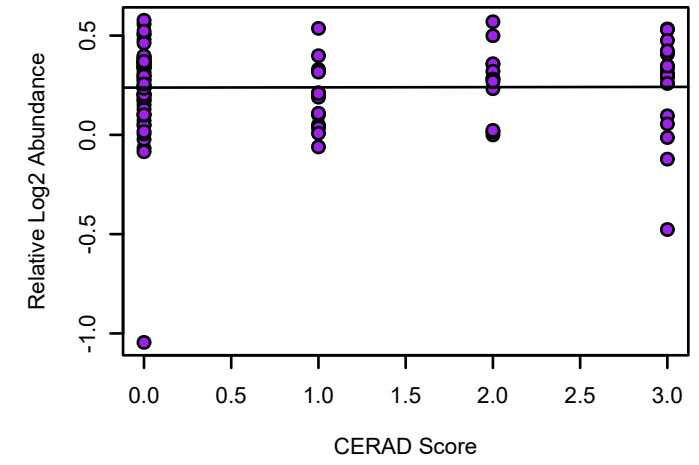

**CFL1 UPenn Mixed PRM**  
NA grey MEGA module member  
K-W ANOVA p: 0.00069

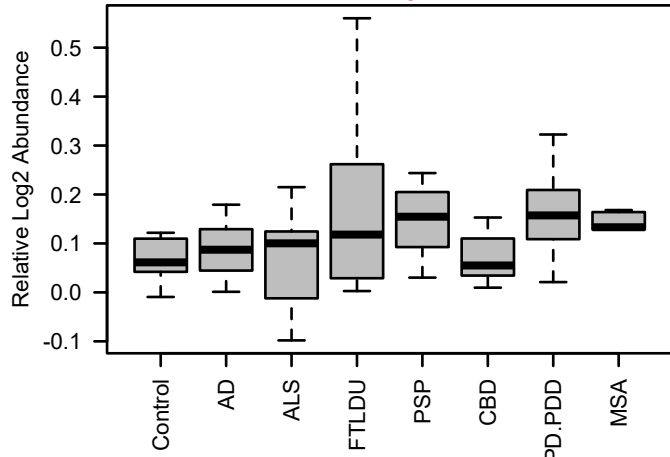

**CFL1 UPenn Mixed PRM**  
K-W ANOVA p: 0.0062

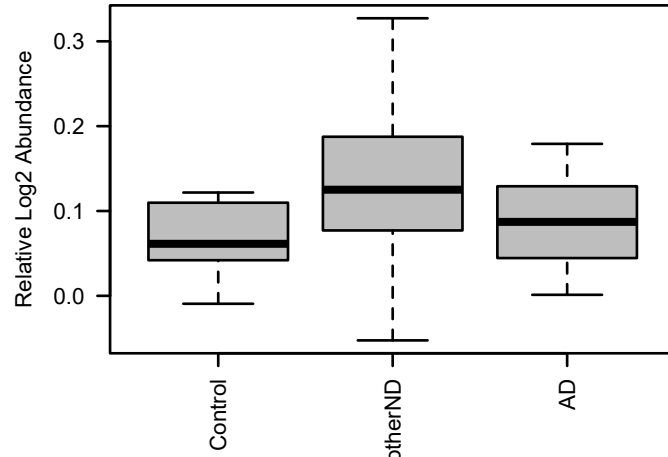

**bicor=0.026, p=0.81**  
**cor=0.056, p=0.61**

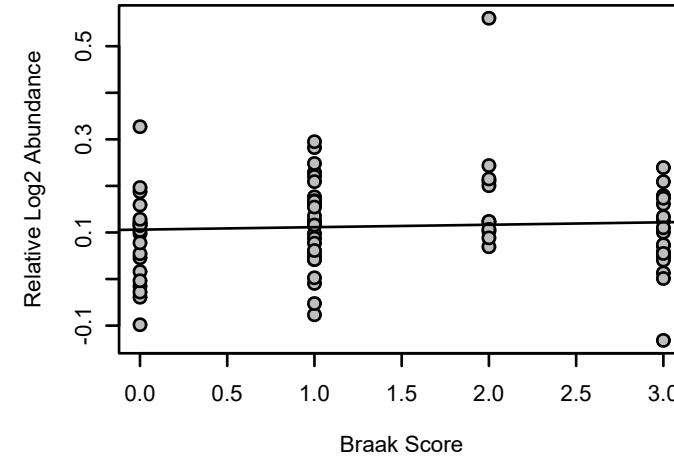

**bicor=-0.014, p=0.89**  
**cor=-0.026, p=0.8**

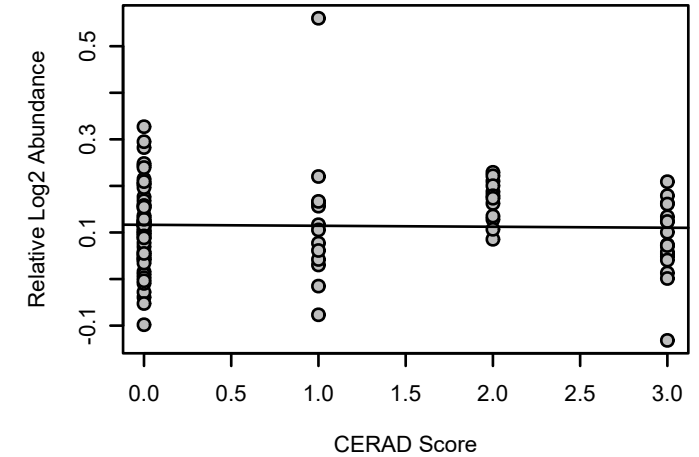

**ATP2B4 UPenn Mixed PRM**  
M1 turquoise MEGA module member  
K-W ANOVA p: 0.44

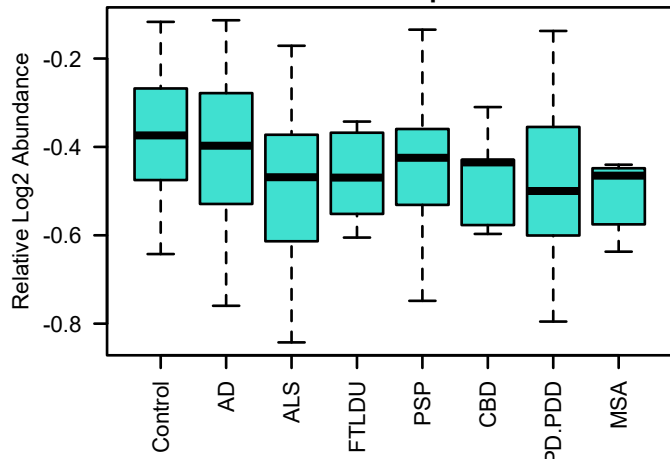

**ATP2B4 UPenn Mixed PRM**  
K-W ANOVA p: 0.067

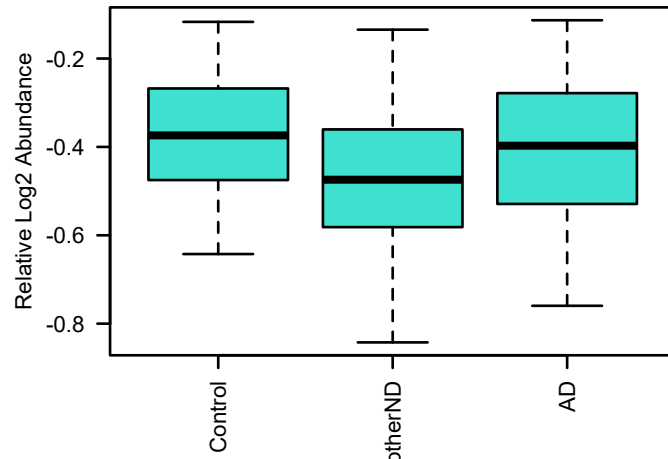

**bicor=0.049, p=0.66**  
**cor=0.055, p=0.62**

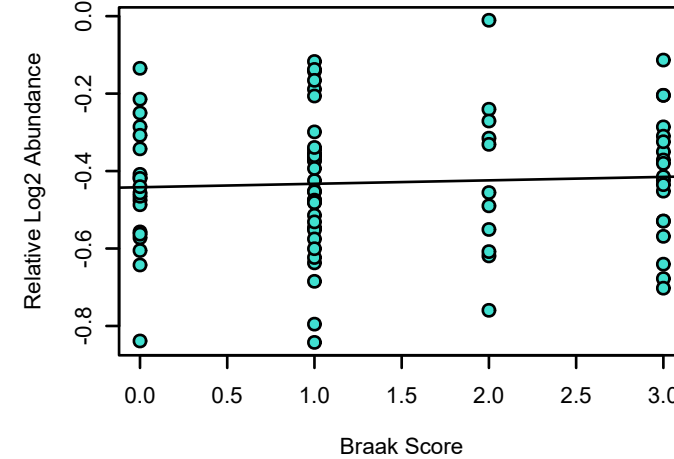

**bicor=0.097, p=0.34**  
**cor=0.11, p=0.28**

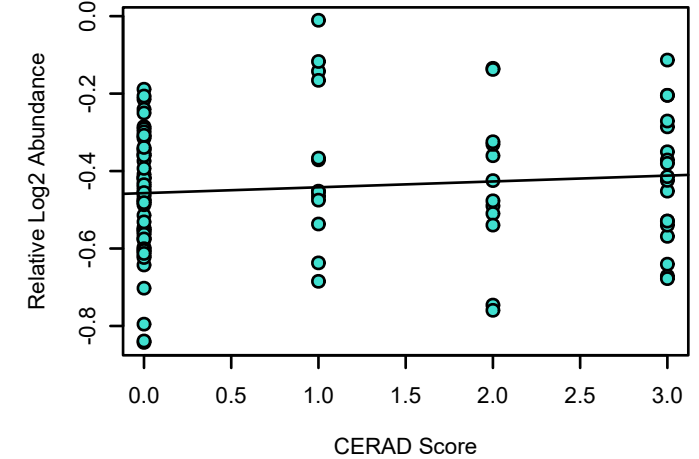

**ATP5F1 UPenn Mixed PRM**  
M3 brown MEGA module member  
K-W ANOVA p: 0.11

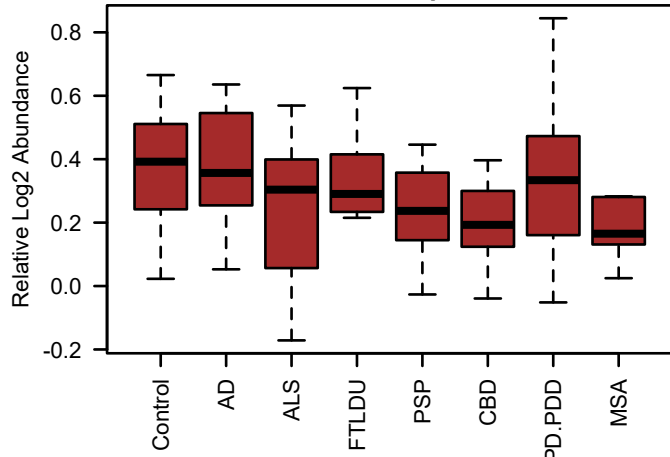

**ATP5F1 UPenn Mixed PRM**  
K-W ANOVA p: 0.041

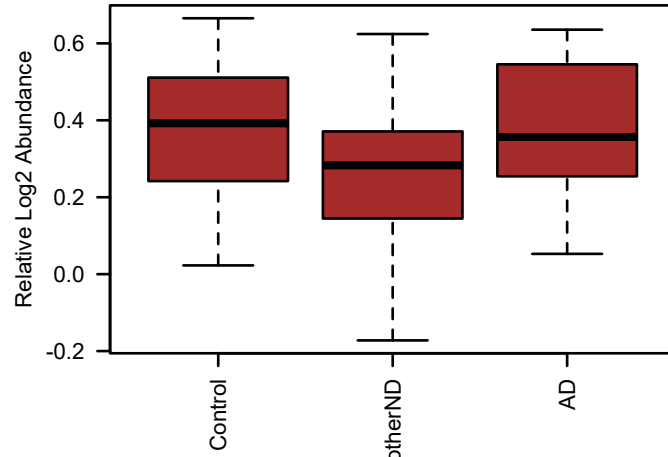

**bicor=0.047, p=0.67**  
**cor=0.069, p=0.53**

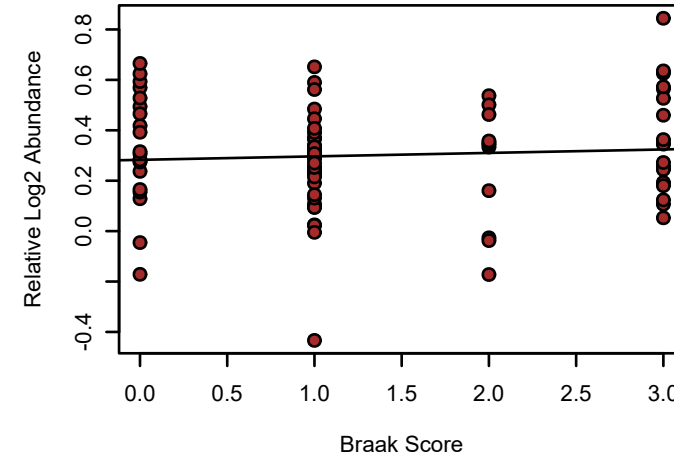

**bicor=0.15, p=0.15**  
**cor=0.13, p=0.2**

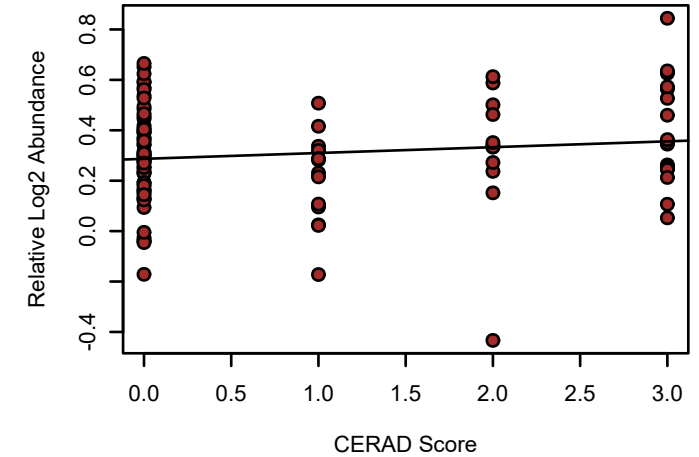

**DNAJB2 UPenn Mixed PRM**  
NA grey MEGA module member  
K-W ANOVA p: 0.0094

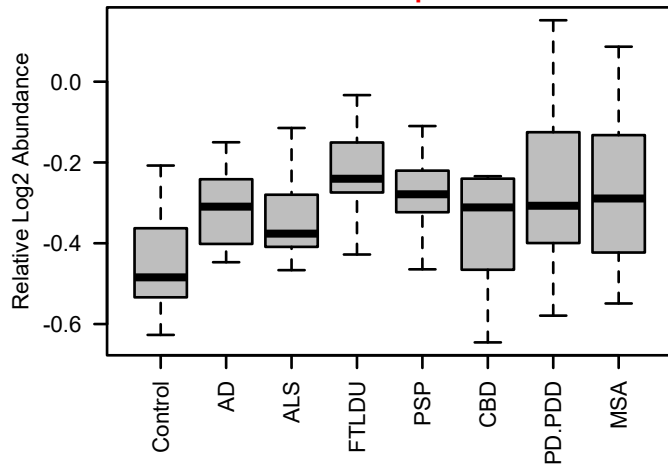

**DNAJB2 UPenn Mixed PRM**  
K-W ANOVA p: 0.0022

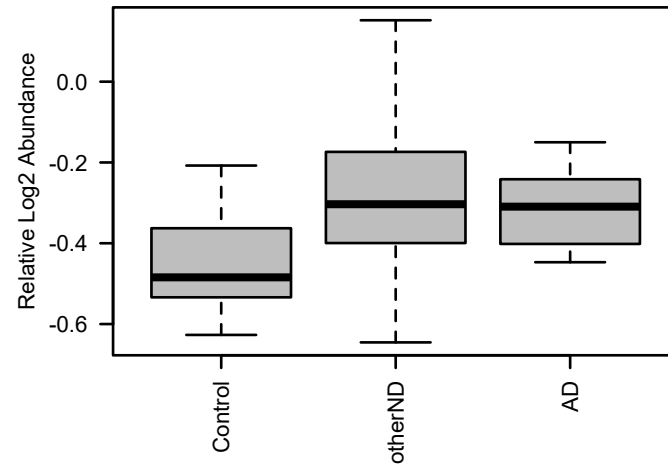

**bicor=0.21, p=0.051**  
**cor=0.21, p=0.055**

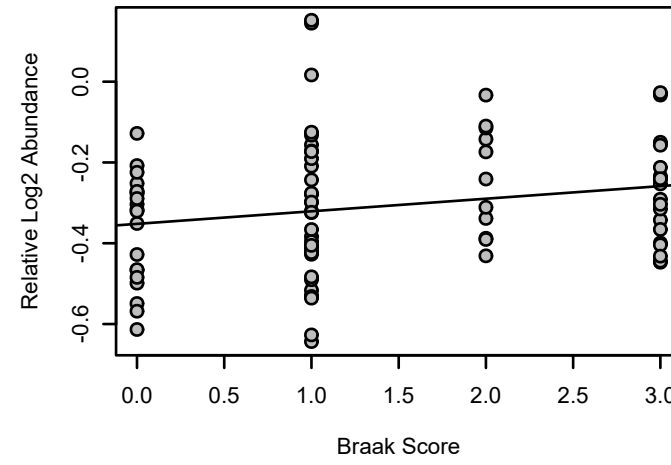

**bicor=0.18, p=0.072**  
**cor=0.16, p=0.11**

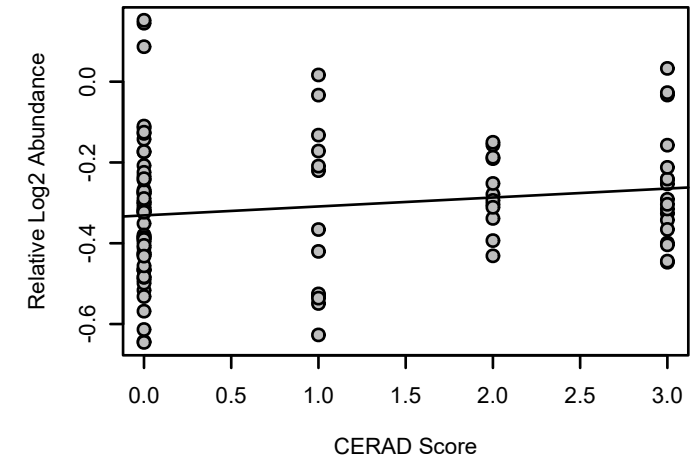

**ATP5A1 UPenn Mixed PRM**  
M3 brown MEGA module member  
K-W ANOVA p: 0.52

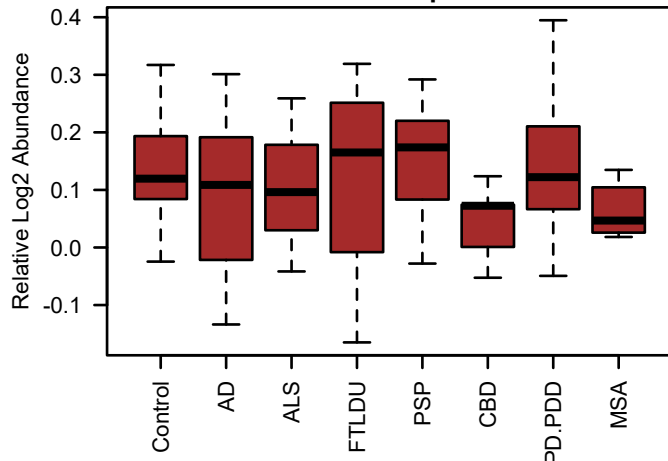

**ATP5A1 UPenn Mixed PRM**  
K-W ANOVA p: 0.52

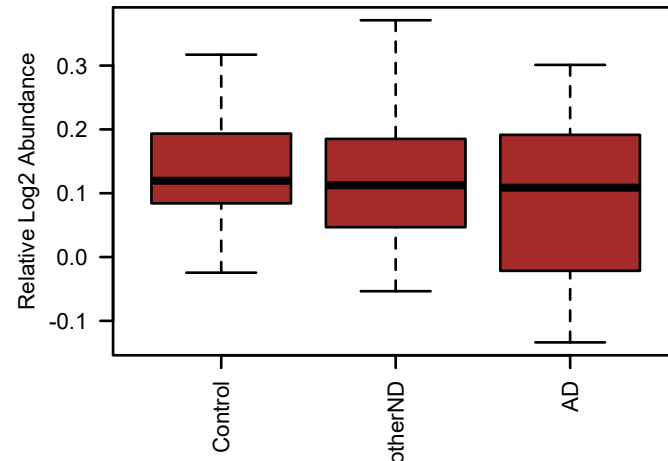

**bicor=-0.092, p=0.4**  
**cor=-0.12, p=0.28**

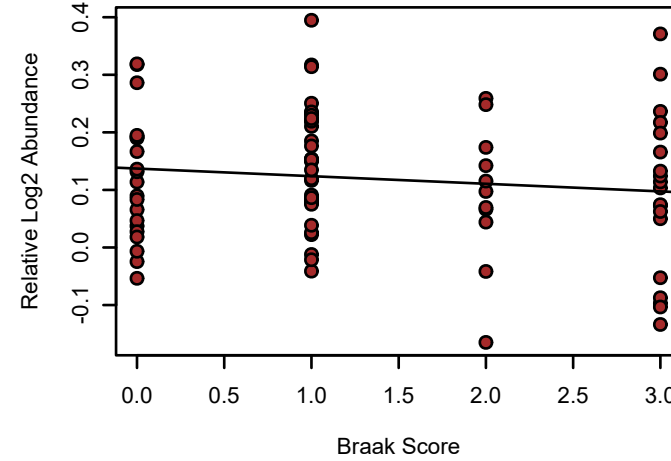

**bicor=-0.083, p=0.41**  
**cor=-0.094, p=0.35**

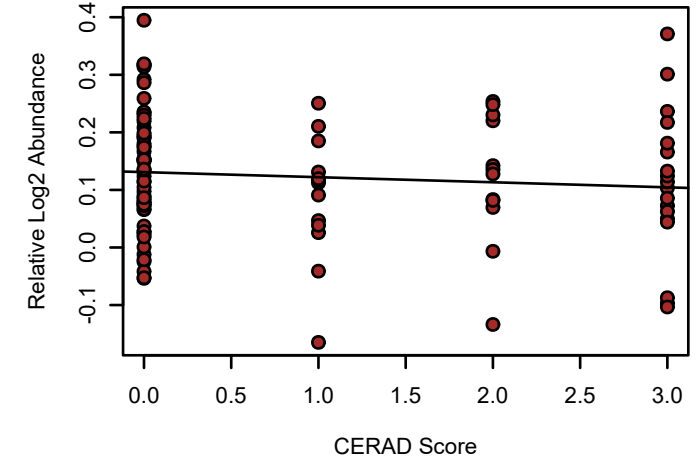

**MSN UPenn Mixed PRM**  
M4 yellow MEGA module member  
K-W ANOVA p: 1.7e-06

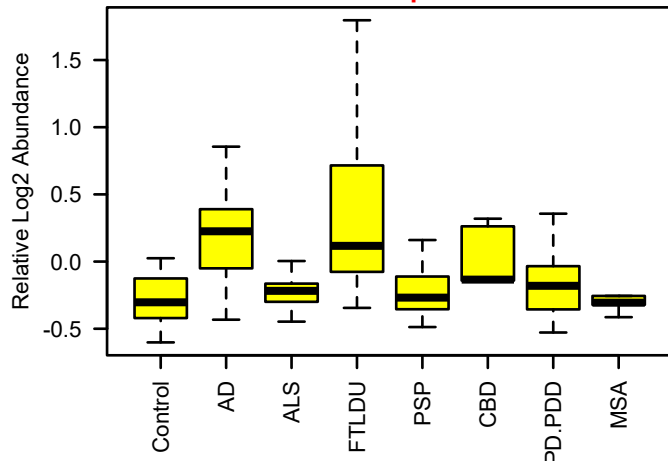

**MSN UPenn Mixed PRM**  
K-W ANOVA p: 0.00014

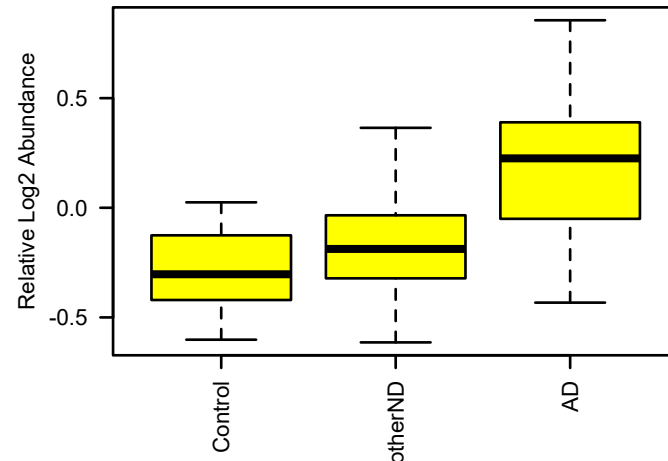

**bicor=0.46, p=1e-05**  
**cor=0.4, p=0.00016**

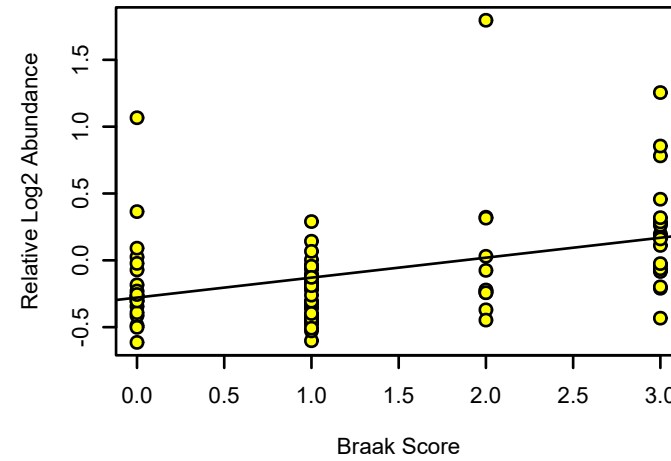

**bicor=0.31, p=0.0019**  
**cor=0.3, p=0.0024**

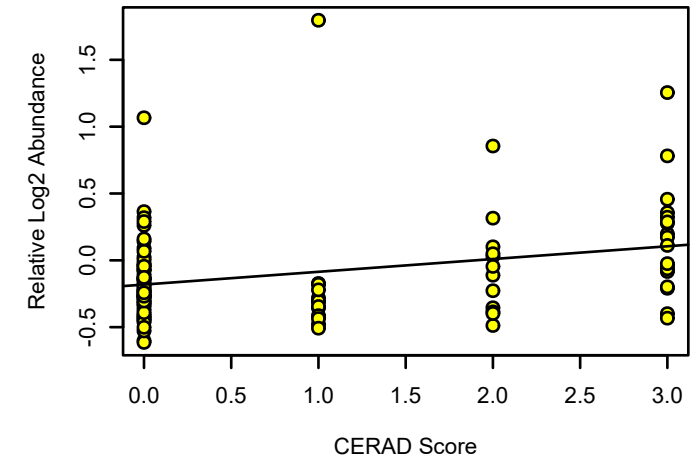

**RPL13 UPenn Mixed PRM**  
M7 black MEGA module member  
K-W ANOVA p: 0.18

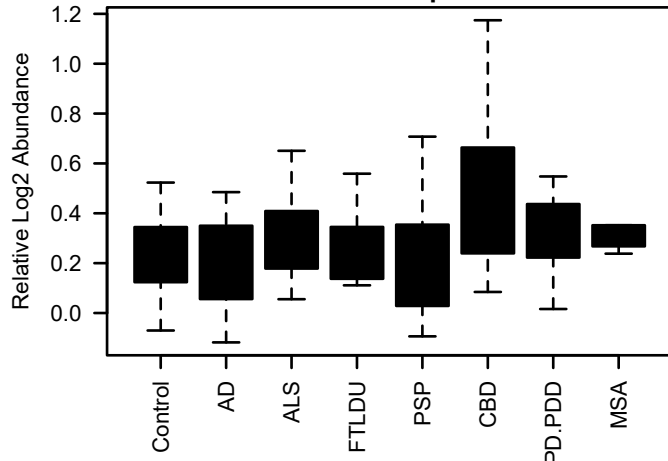

**RPL13 UPenn Mixed PRM**  
K-W ANOVA p: 0.17

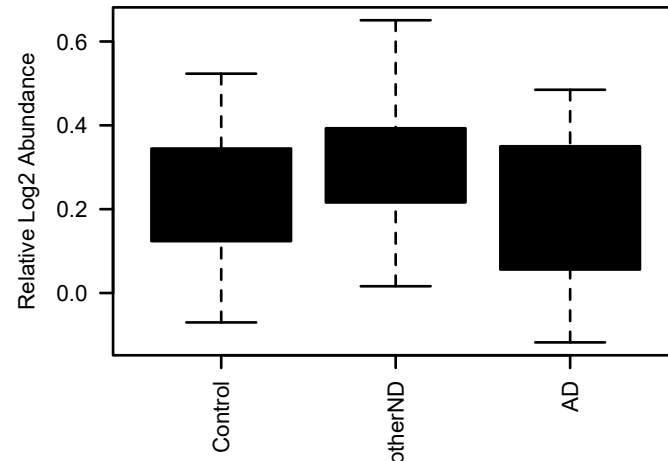

**bicor=-0.09, p=0.42**  
**cor=0.0049, p=0.96**

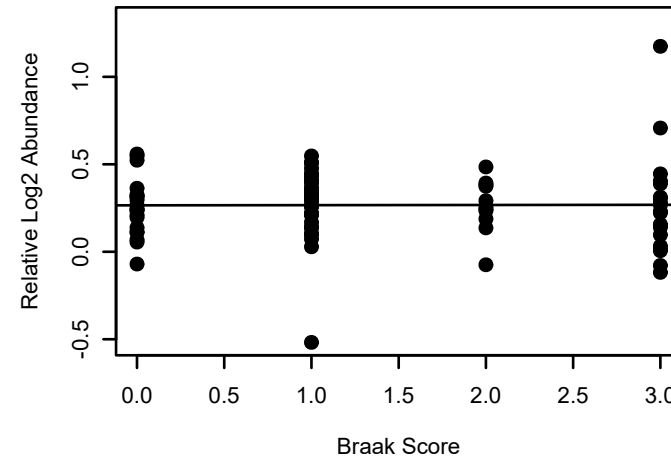

**bicor=-0.14, p=0.16**  
**cor=-0.19, p=0.058**

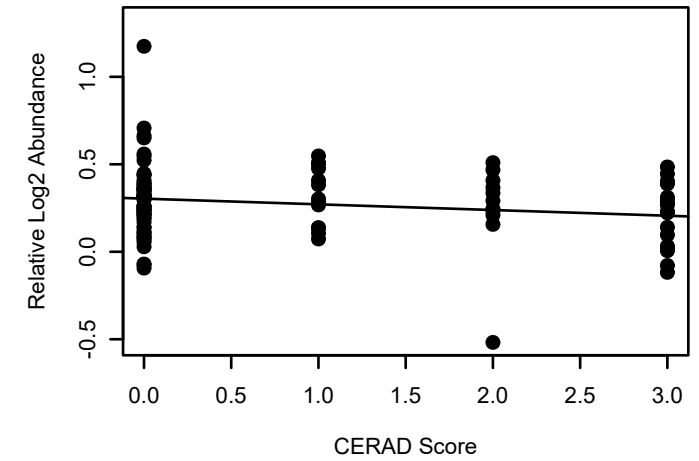

**MAP4 UPenn Mixed PRM**  
**M10 purple MEGA module member**  
**K-W ANOVA p: 0.019**

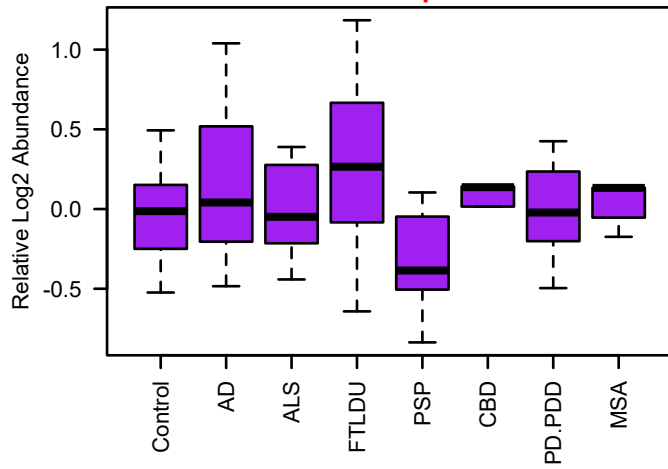

**MAP4 UPenn Mixed PRM**  
**K-W ANOVA p: 0.2**

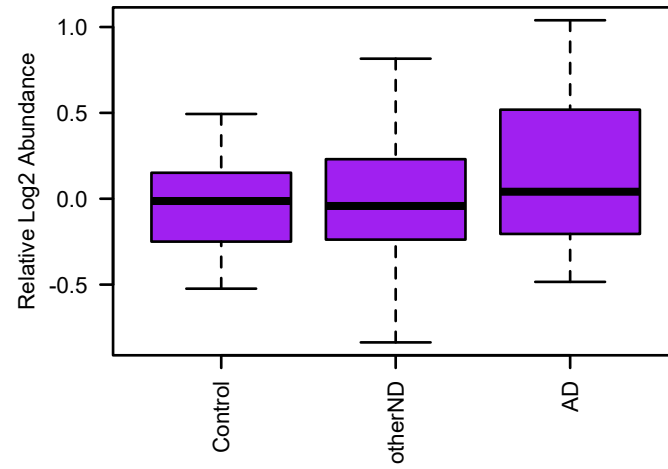

**bicor=0.13, p=0.24**  
**cor=0.15, p=0.17**

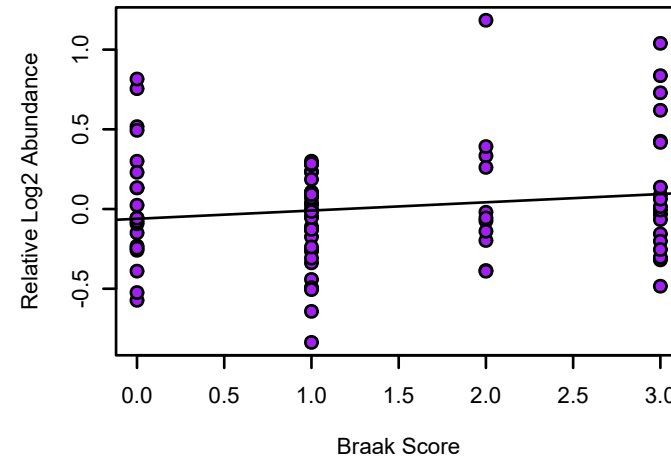

**bicor=0.13, p=0.2**  
**cor=0.15, p=0.14**

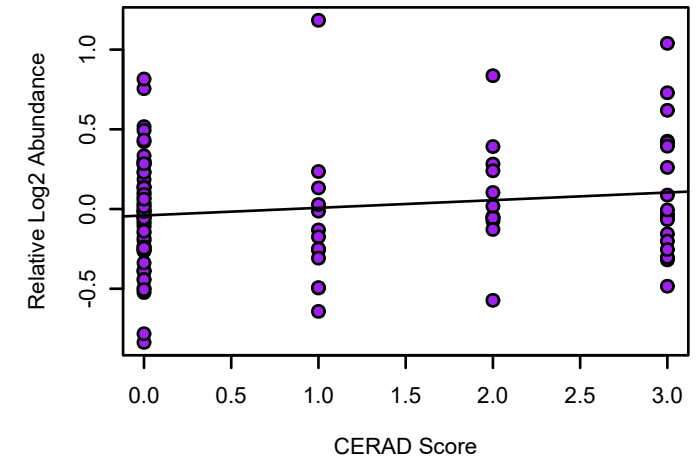

**NDUFS1 UPenn Mixed PRM**  
**M3 brown MEGA module member**  
**K-W ANOVA p: 0.00028**

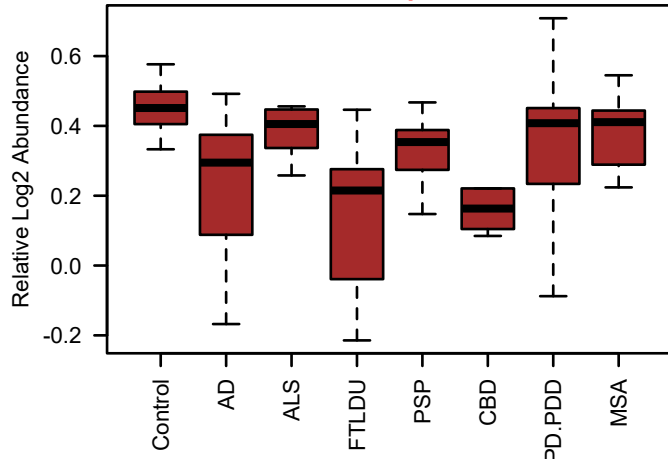

**NDUFS1 UPenn Mixed PRM**  
**K-W ANOVA p: 0.0034**

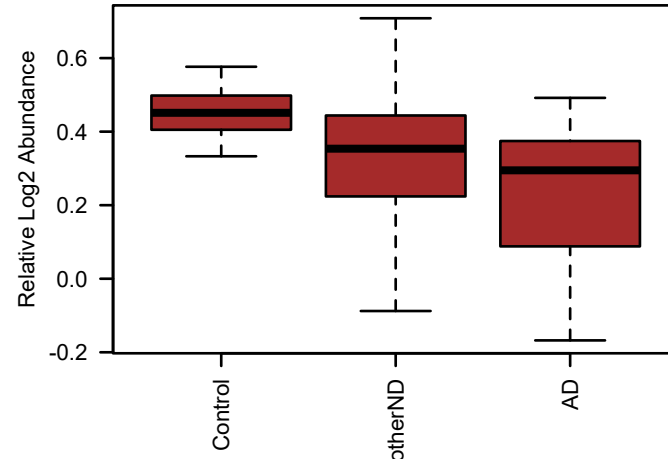

**bicor=-0.37, p=0.00058**  
**cor=-0.33, p=0.0022**

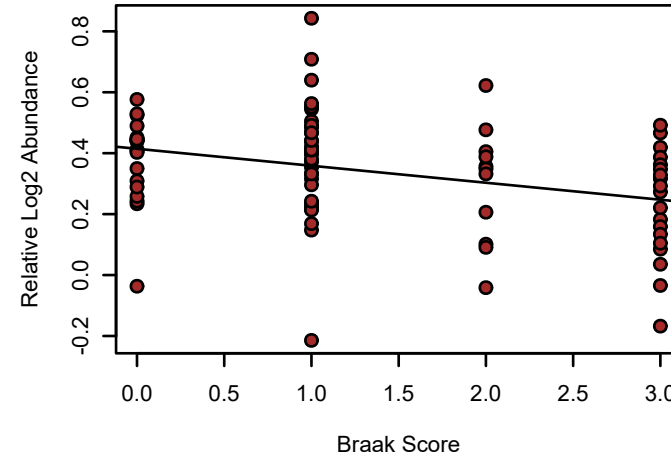

**bicor=-0.2, p=0.041**  
**cor=-0.24, p=0.016**

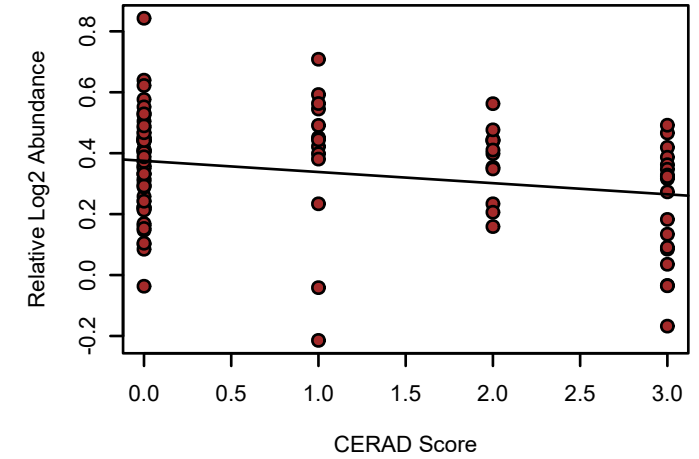

**MAPK1 UPenn Mixed PRM**  
**M4 yellow MEGA module member**  
**K-W ANOVA p: 1.3e-05**

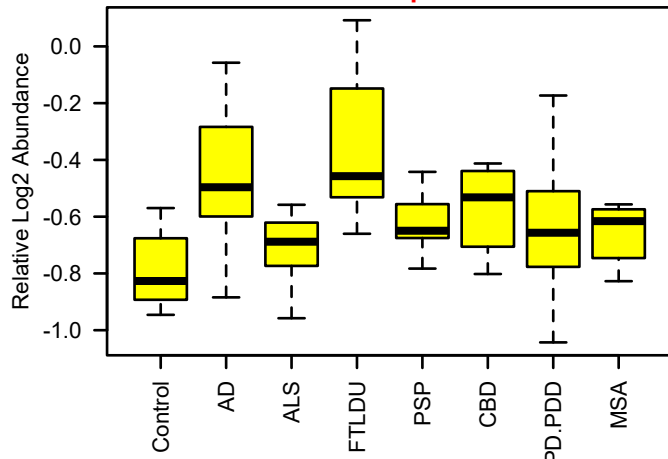

**MAPK1 UPenn Mixed PRM**  
**K-W ANOVA p: 9.7e-05**

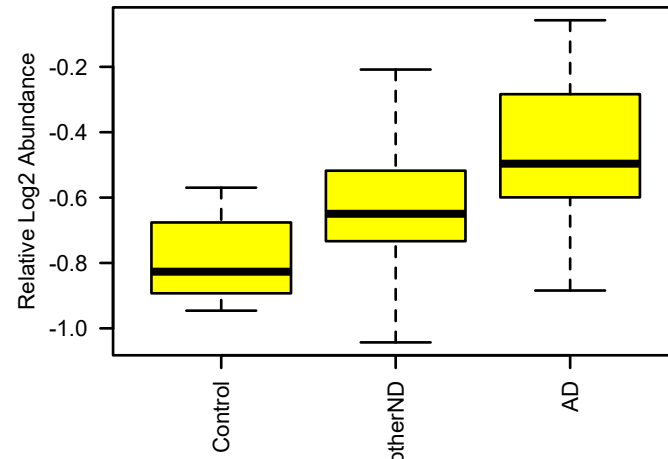

**bicor=0.41, p=0.00012**  
**cor=0.36, p=0.00077**

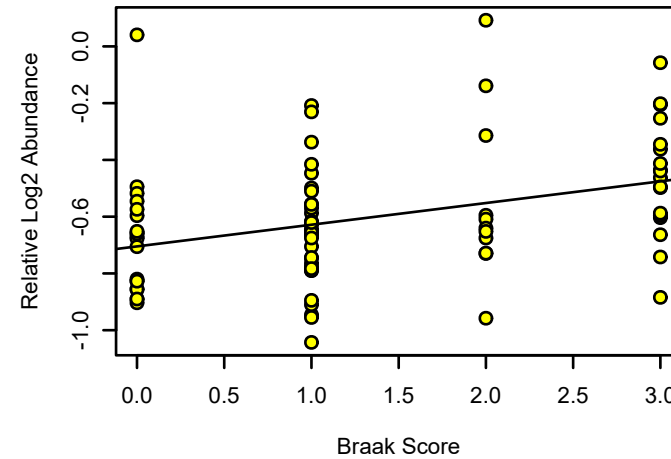

**bicor=0.3, p=0.0022**  
**cor=0.27, p=0.0066**

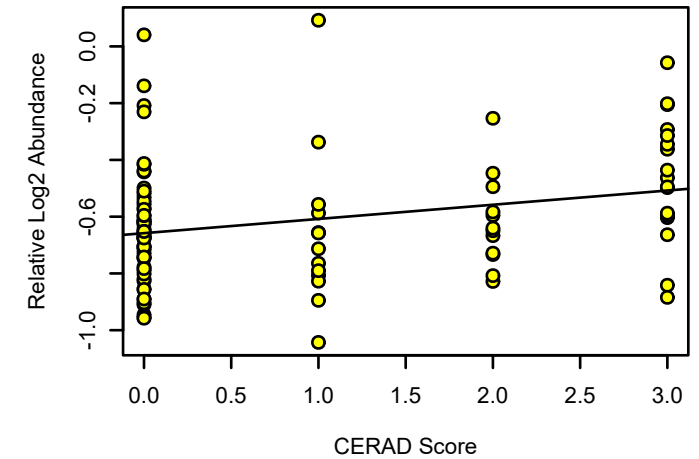

**PRDX6 UPenn Mixed PRM**  
**M4 yellow MEGA module member**  
**K-W ANOVA p: 3.4e-05**

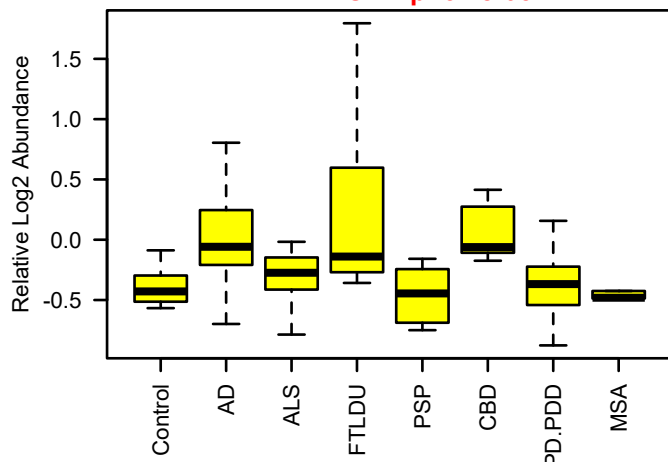

**PRDX6 UPenn Mixed PRM**  
**K-W ANOVA p: 0.0044**

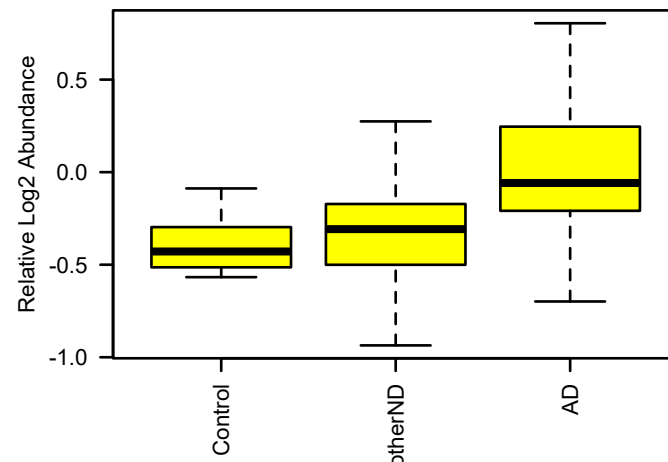

**bicor=0.33, p=0.0024**  
**cor=0.32, p=0.003**

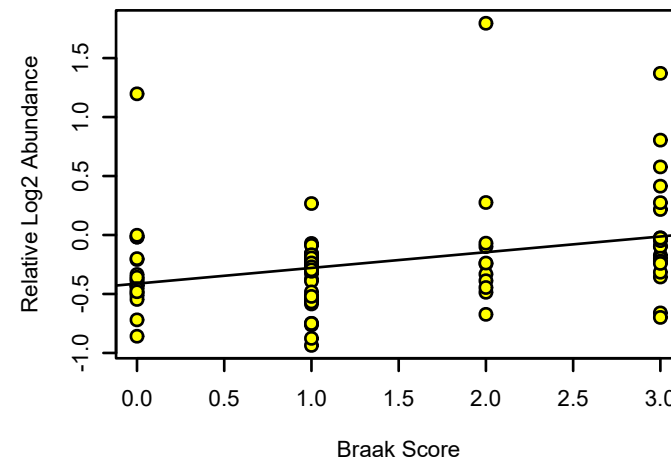

**bicor=0.23, p=0.021**  
**cor=0.21, p=0.036**

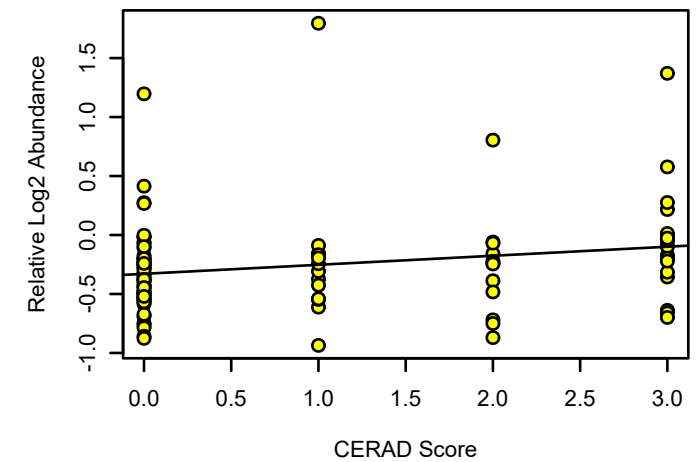

**PPP2R1A UPenn Mixed PRM**  
M12 tan MEGA module member  
K-W ANOVA p: 0.064

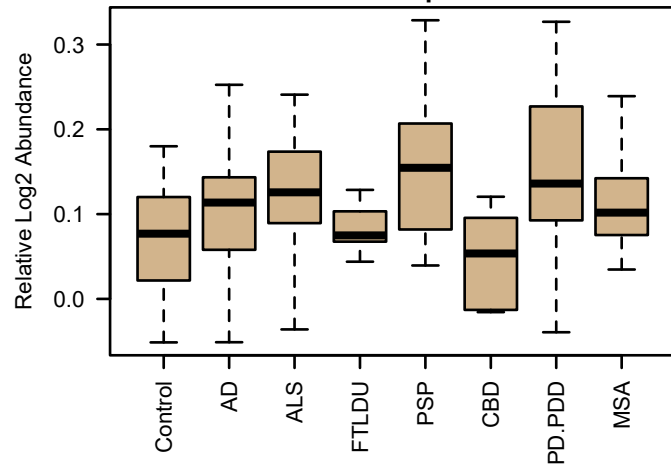

**PPP2R1A UPenn Mixed PRM**  
K-W ANOVA p: 0.033

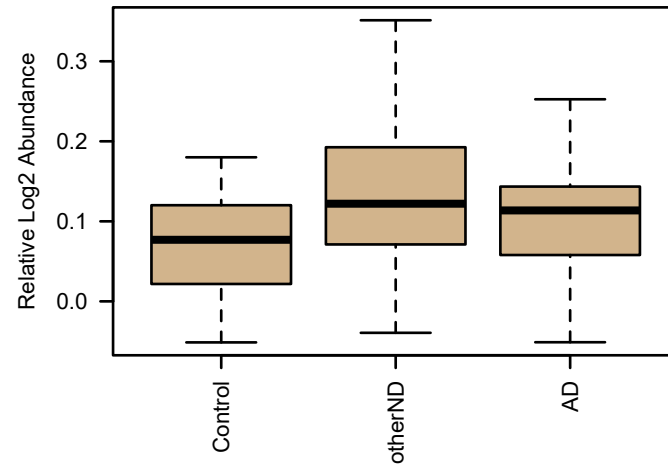

**bicor=0.13, p=0.23**  
**cor=0.12, p=0.28**

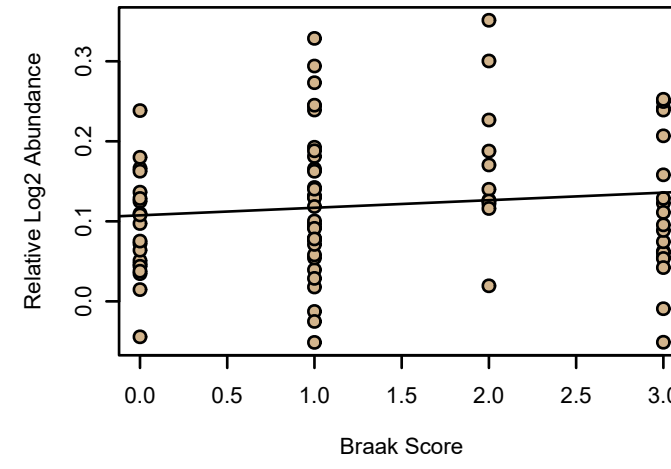

**bicor=0.015, p=0.88**  
**cor=0.015, p=0.88**

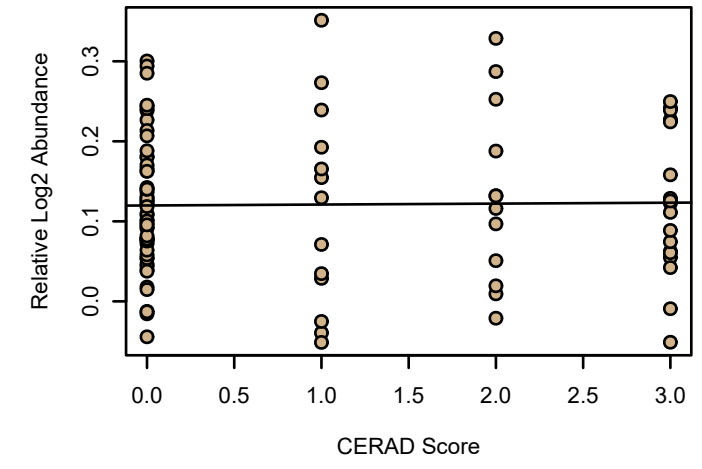

**SDHA UPenn Mixed PRM**  
M3 brown MEGA module member  
K-W ANOVA p: 0.0015

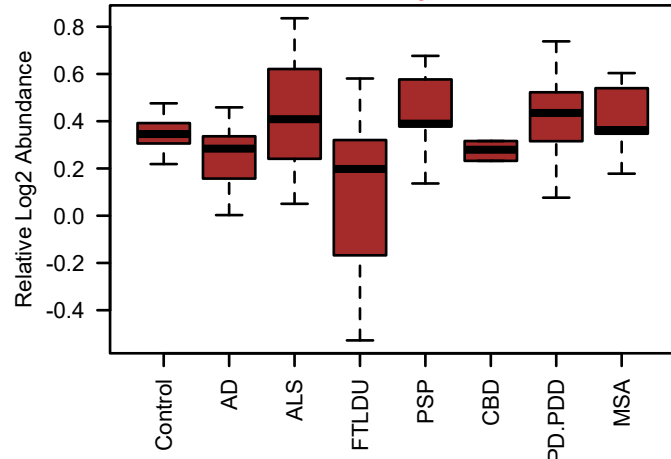

**SDHA UPenn Mixed PRM**  
K-W ANOVA p: 0.11

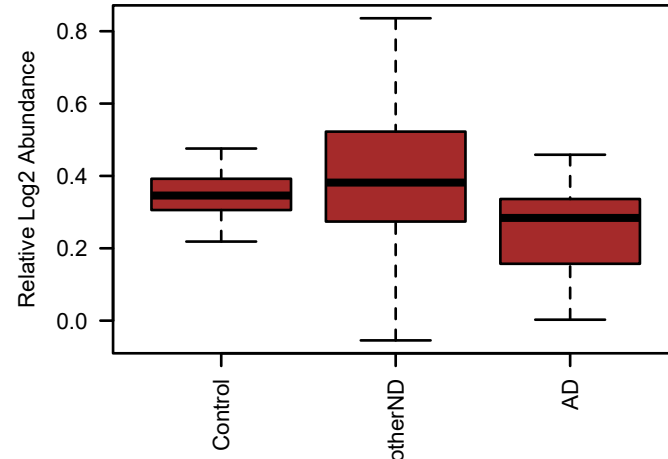

**bicor=-0.14, p=0.19**  
**cor=-0.15, p=0.17**

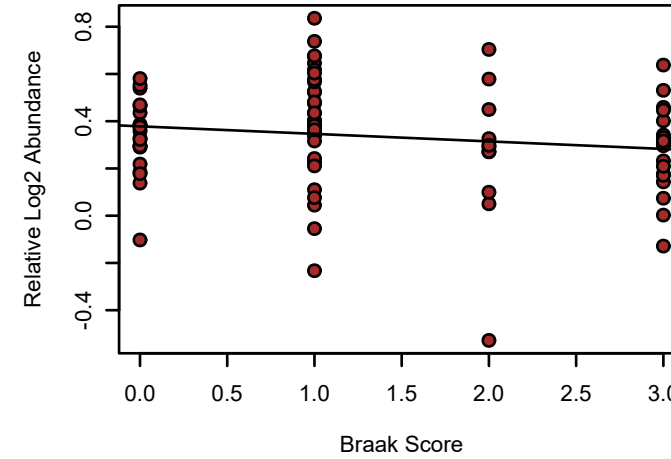

**bicor=-0.078, p=0.44**  
**cor=-0.078, p=0.44**

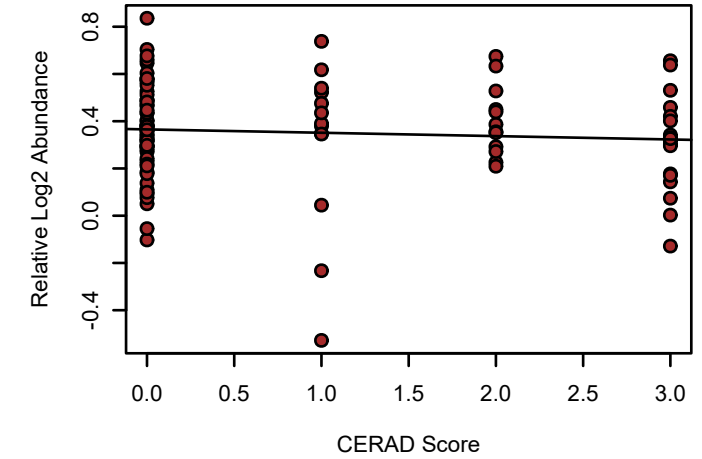

**PRKAR2B UPenn Mixed PRM**  
M1 turquoise MEGA module member  
K-W ANOVA p: 0.33

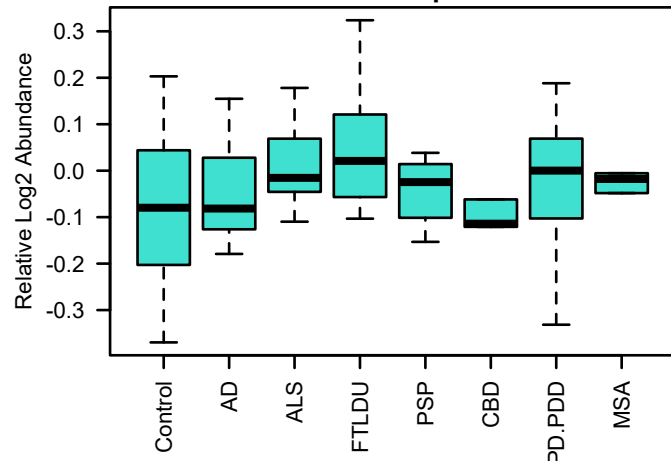

**PRKAR2B UPenn Mixed PRM**  
K-W ANOVA p: 0.13

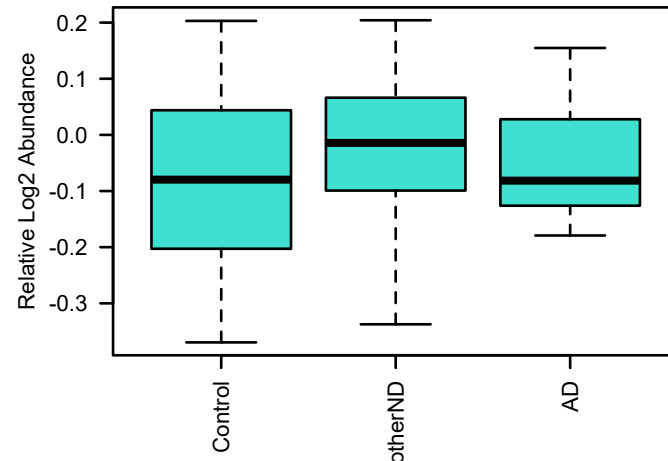

**bicor=-0.0048, p=0.97**  
**cor=-0.013, p=0.91**

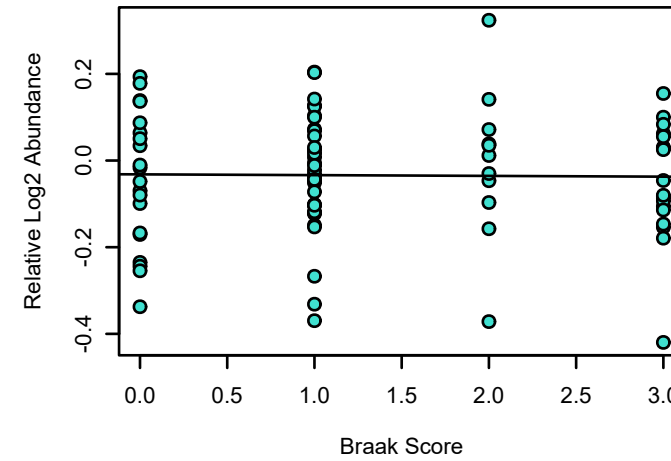

**bicor=0.093, p=0.36**  
**cor=0.11, p=0.28**

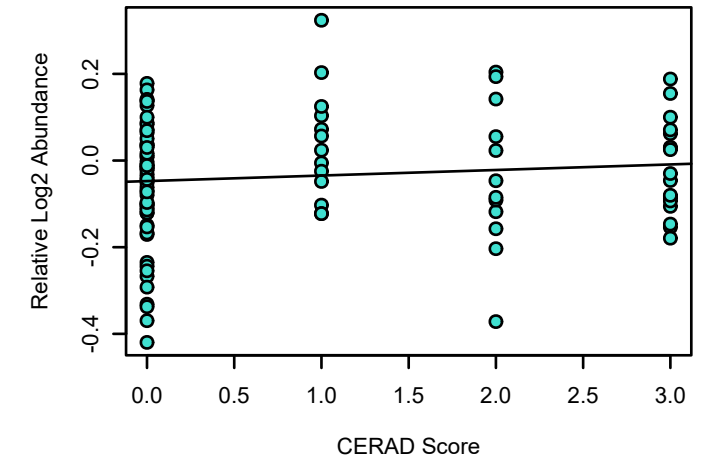

**DNAJA1 UPenn Mixed PRM**  
M11 greenyellow MEGA module member  
K-W ANOVA p: 3.2e-05

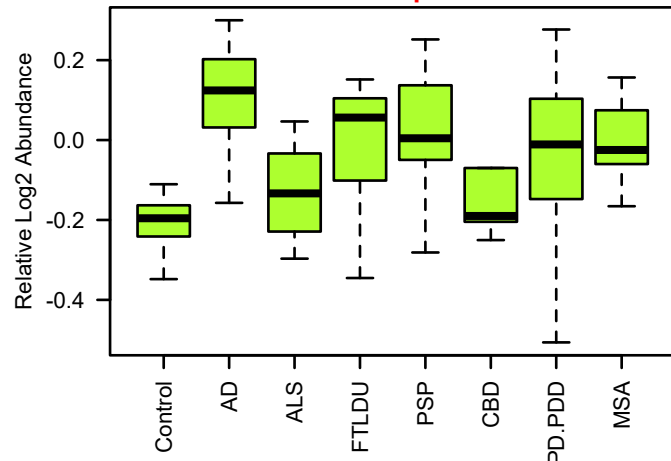

**DNAJA1 UPenn Mixed PRM**  
K-W ANOVA p: 1.6e-05

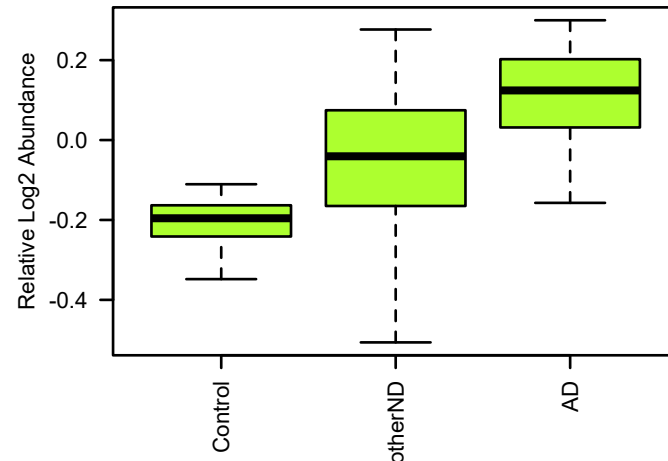

**bicor=0.43, p=4.1e-05**  
**cor=0.46, p=1.1e-05**

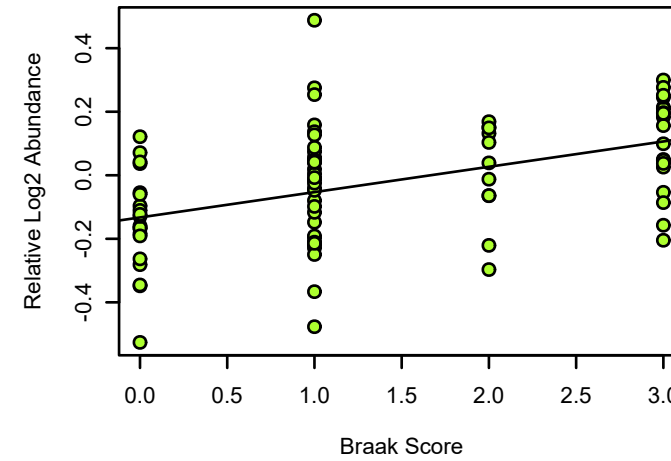

**bicor=0.33, p=0.00096**  
**cor=0.31, p=0.0017**

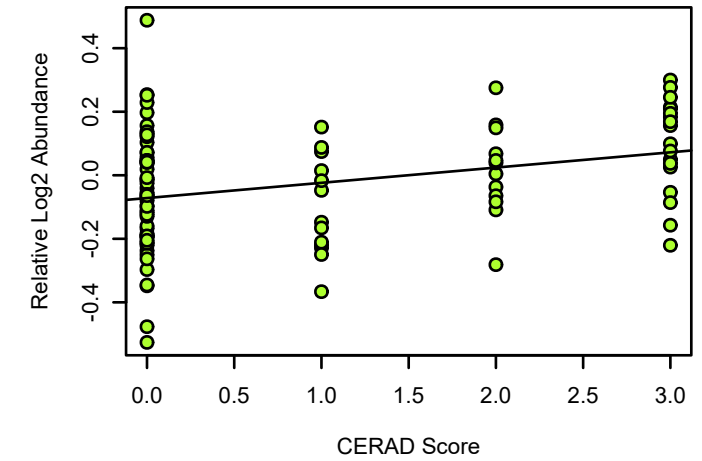

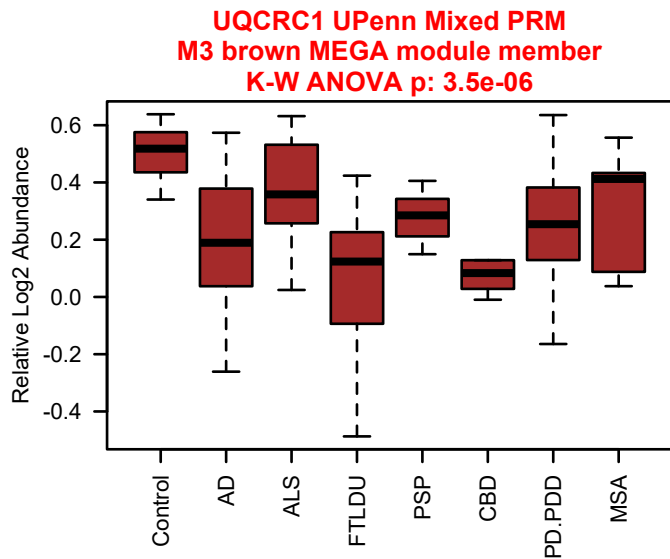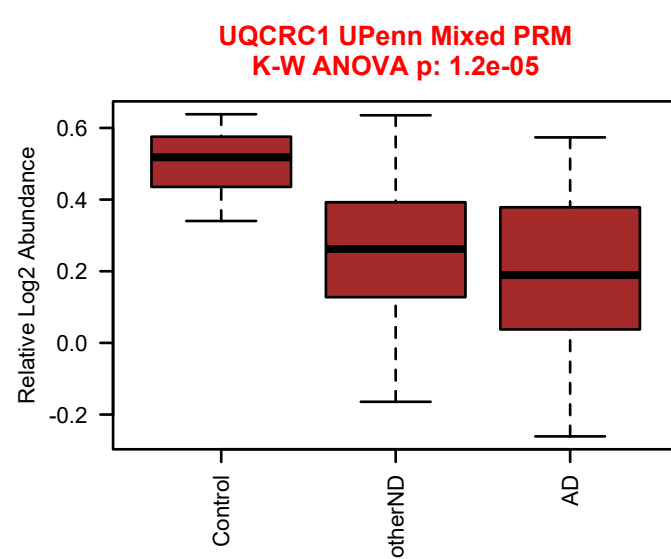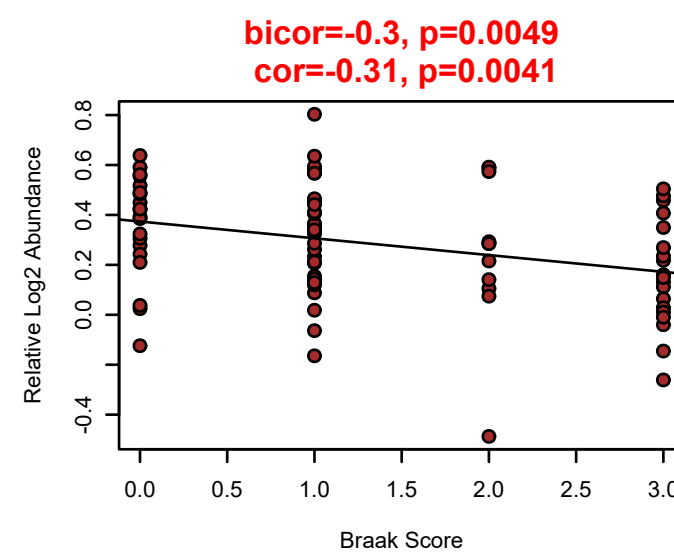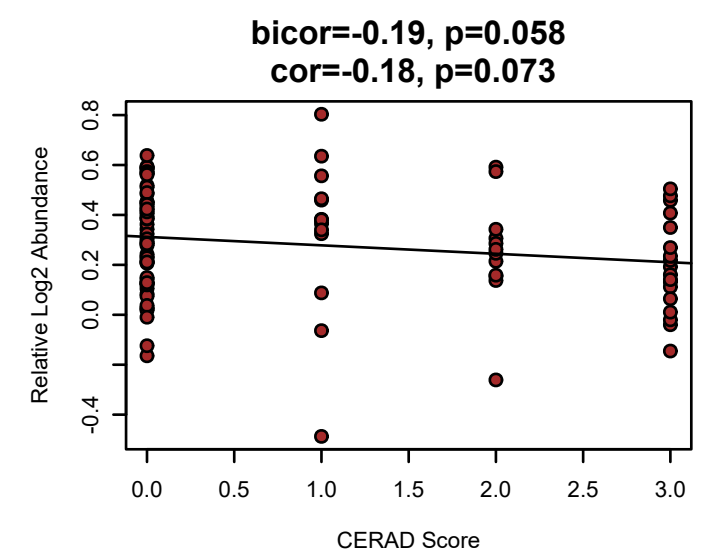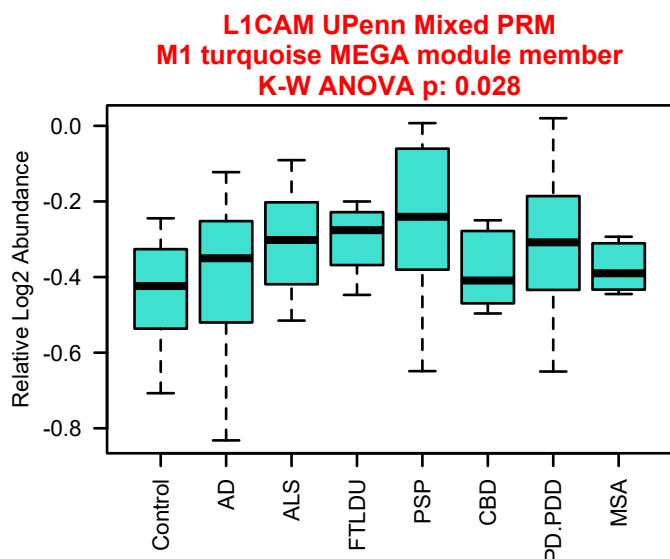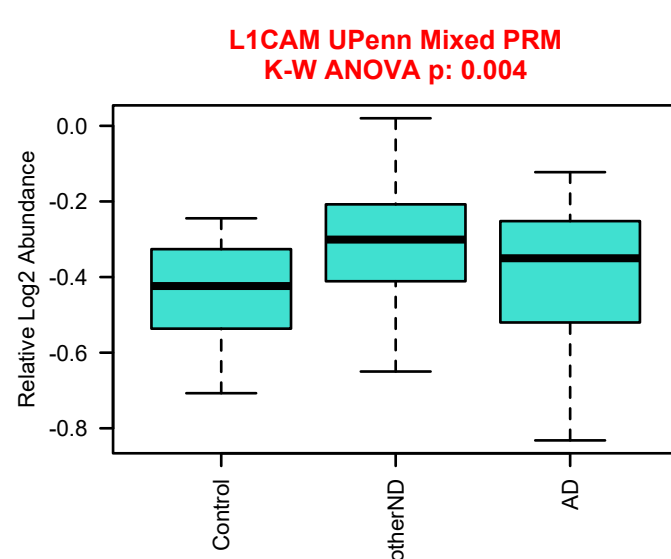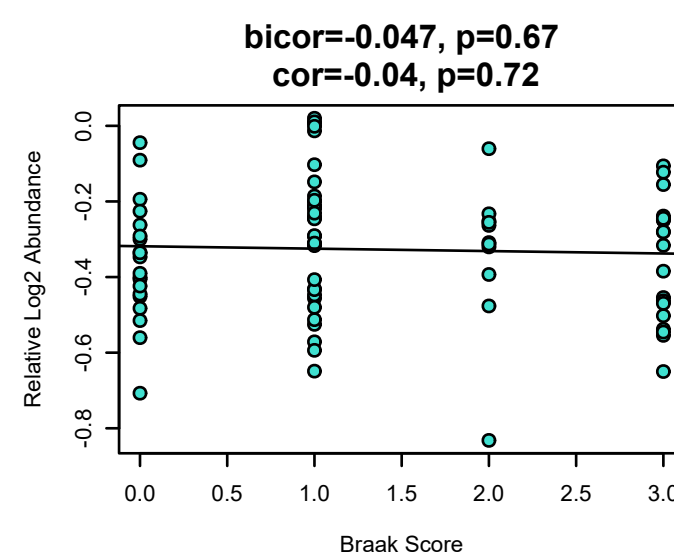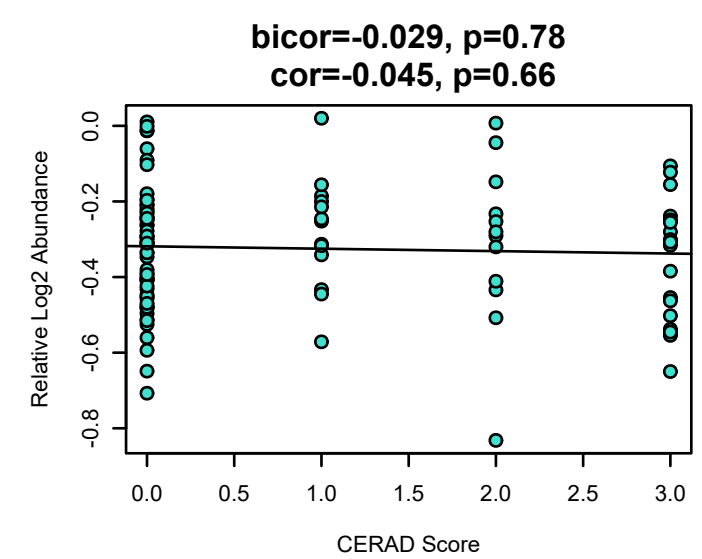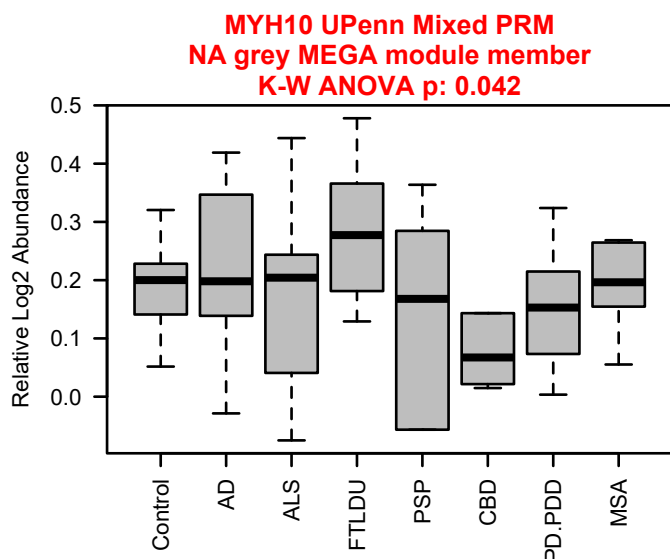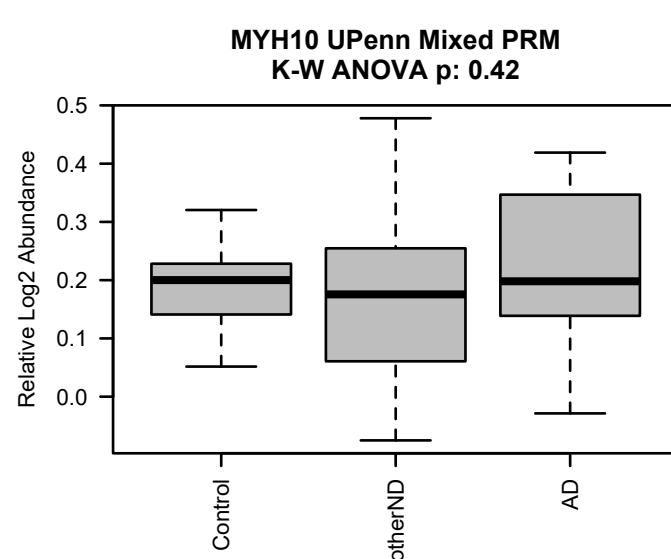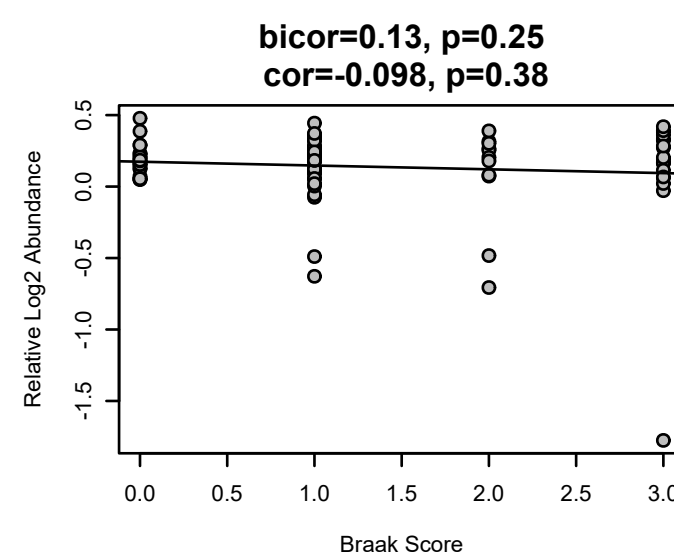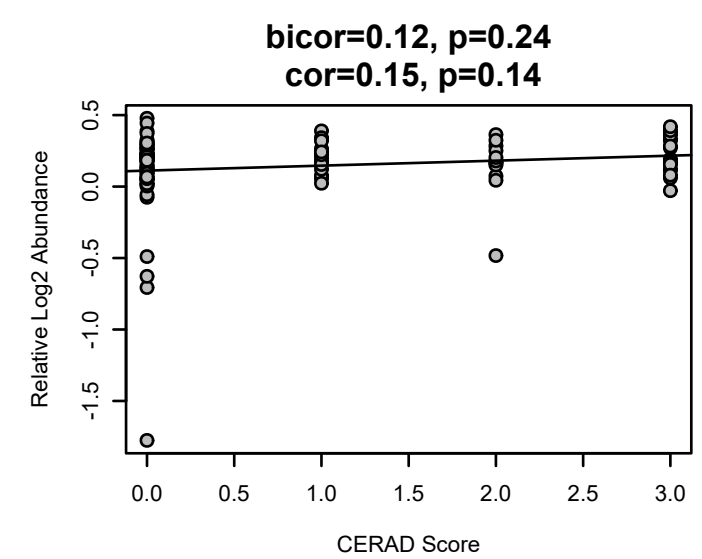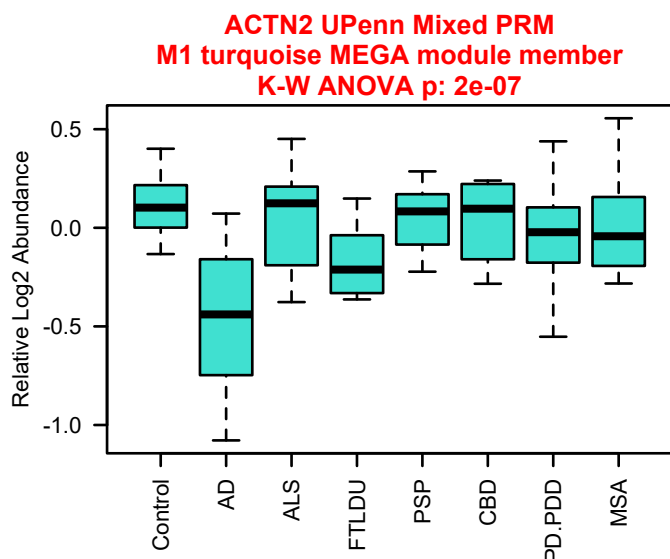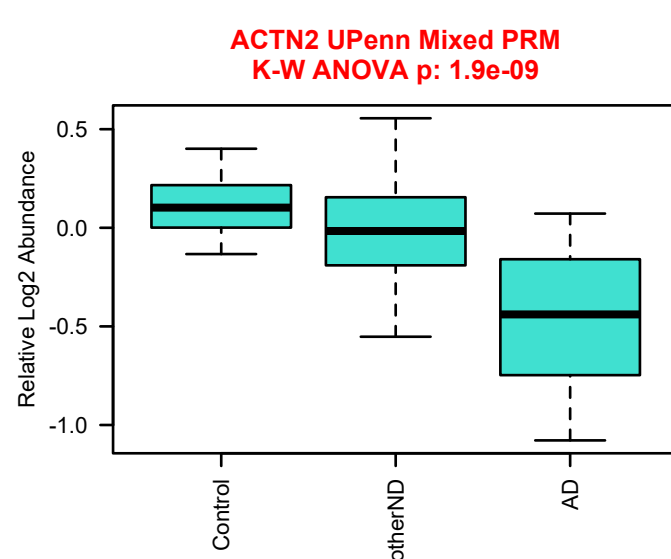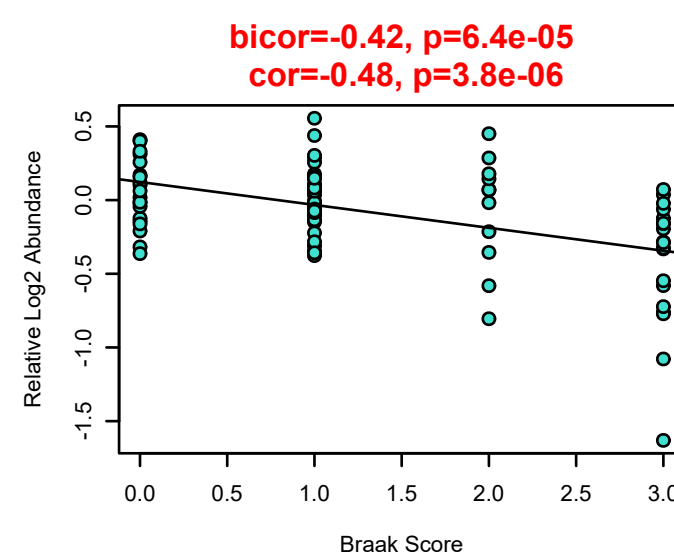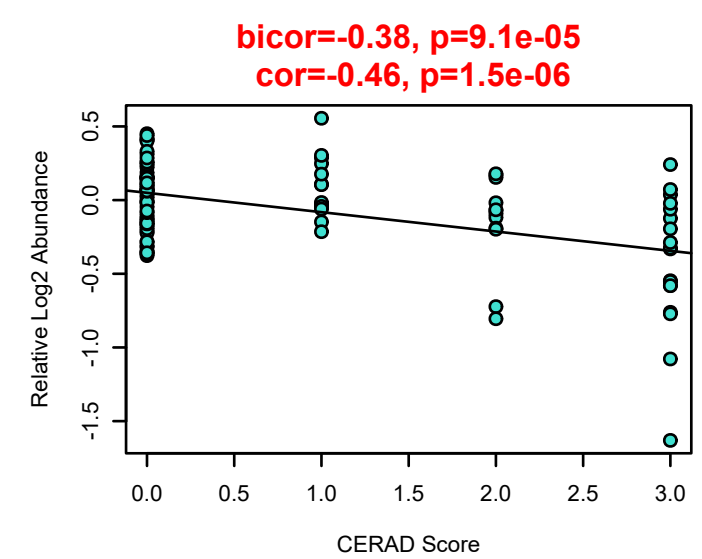



**KRT2 UPenn Mixed PRM**  
NA grey MEGA module member  
K-W ANOVA p: 0.32

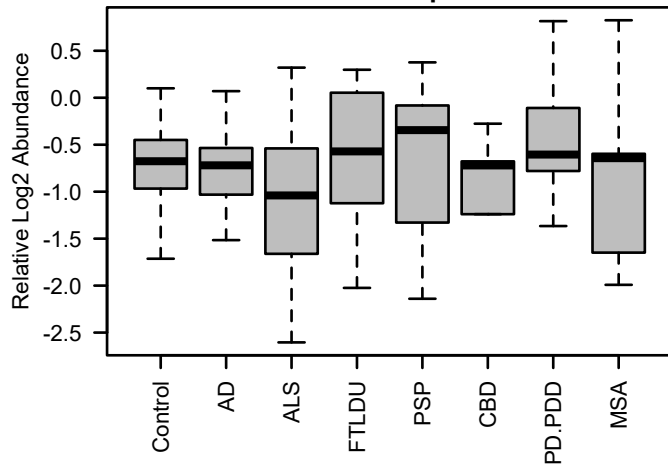

**KRT2 UPenn Mixed PRM**  
K-W ANOVA p: 0.99

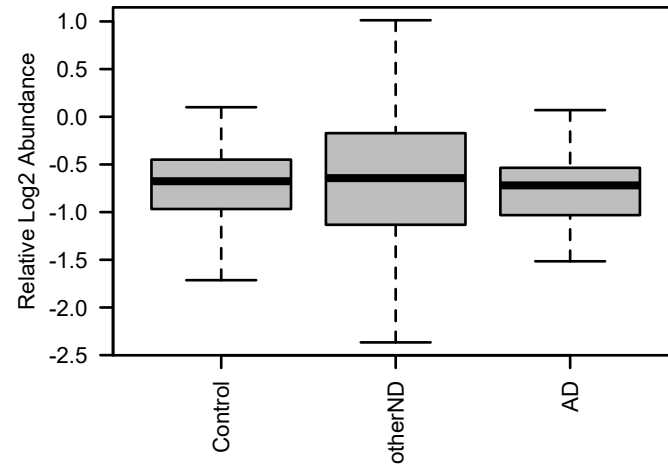

**bicor=0.12, p=0.26**  
**cor=0.17, p=0.12**

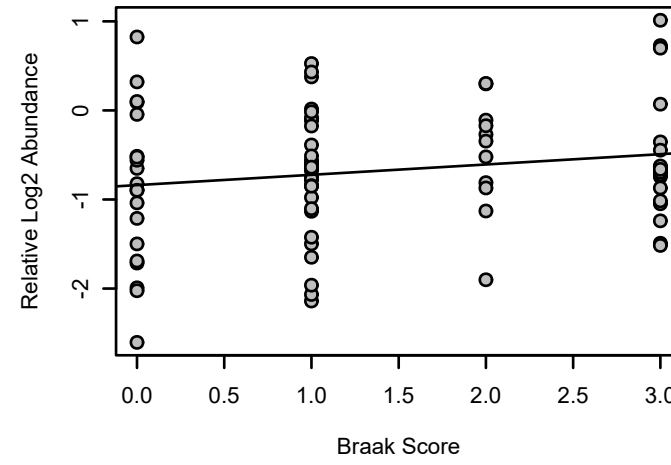

**bicor=0.085, p=0.4**  
**cor=0.12, p=0.23**

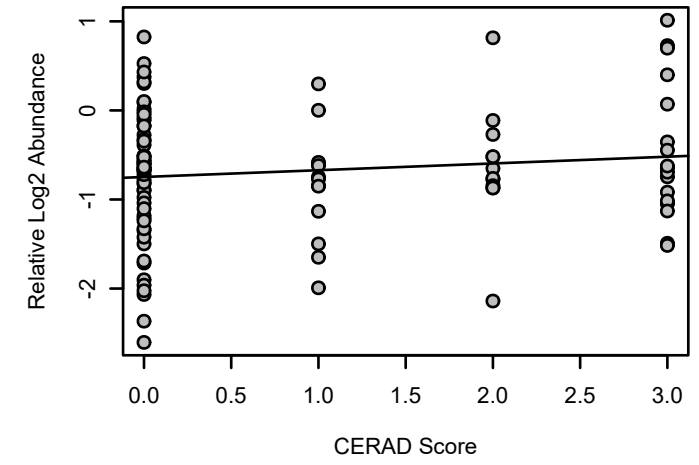

**ATP5C1 UPenn Mixed PRM**  
M3 brown MEGA module member  
K-W ANOVA p: 0.16

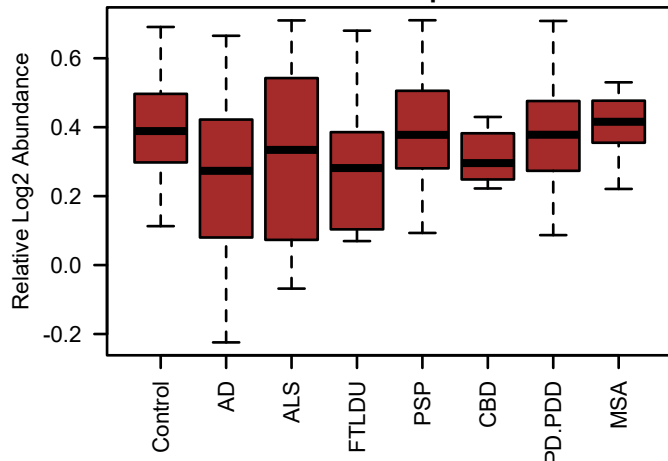

**ATP5C1 UPenn Mixed PRM**  
K-W ANOVA p: 0.2

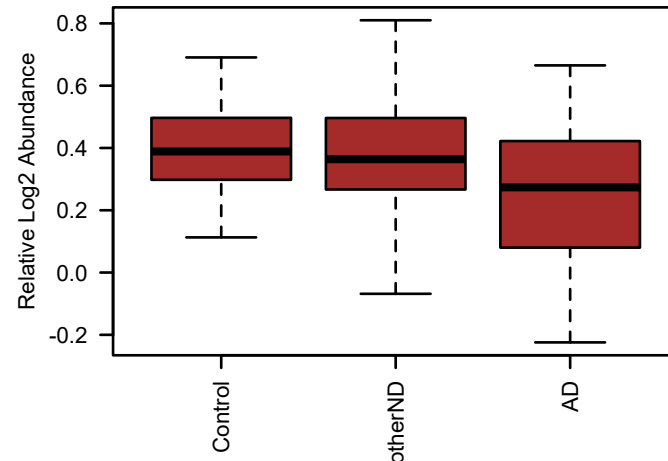

**bicor=-0.12, p=0.26**  
**cor=-0.17, p=0.12**

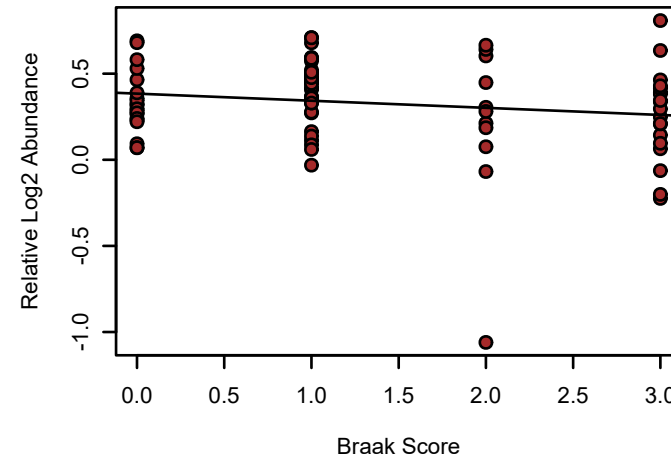

**bicor=-0.13, p=0.18**  
**cor=-0.12, p=0.23**

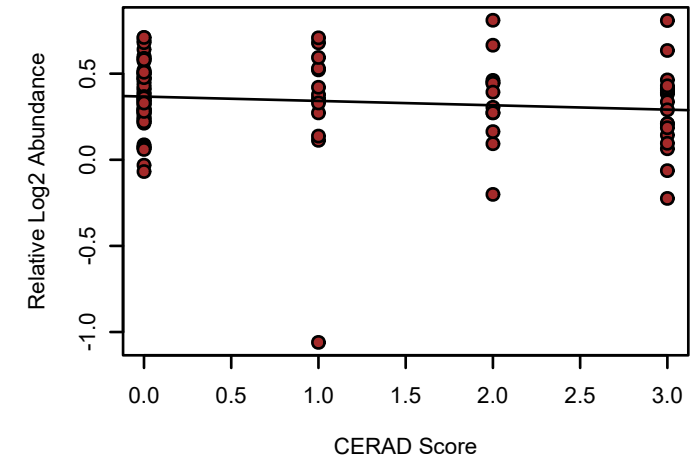

**ATP6V1E2 UPenn Mixed PRM**  
NA grey20 MEGA module member  
K-W ANOVA p: 0.21

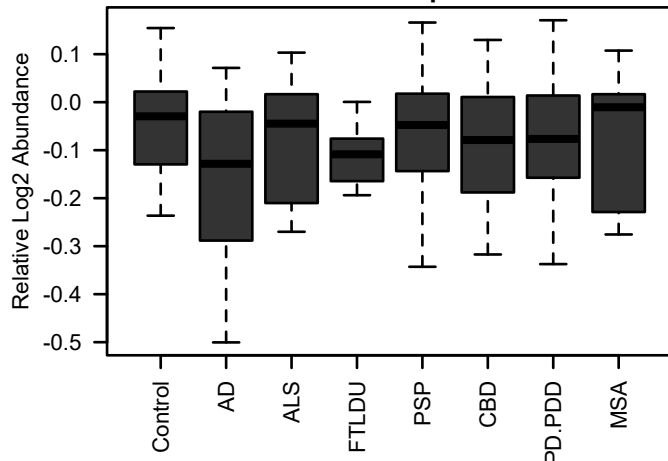

**ATP6V1E2 UPenn Mixed PRM**  
K-W ANOVA p: 0.37

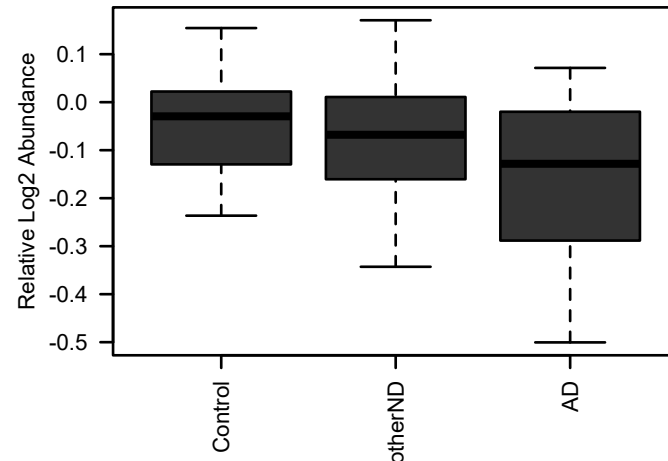

**bicor=-0.18, p=0.096**  
**cor=-0.18, p=0.1**

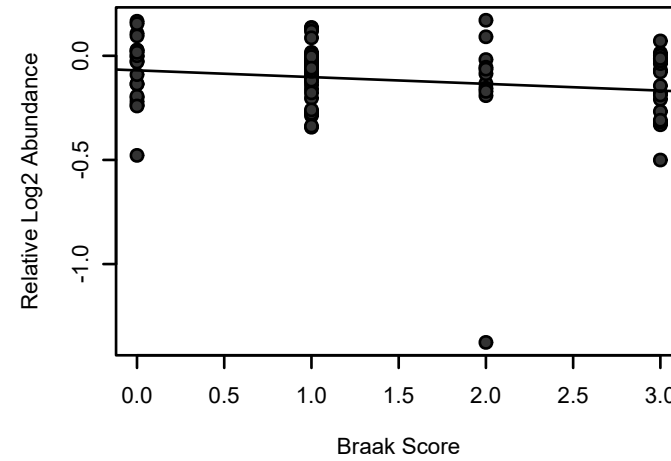

**bicor=-0.1, p=0.31**  
**cor=-0.083, p=0.41**

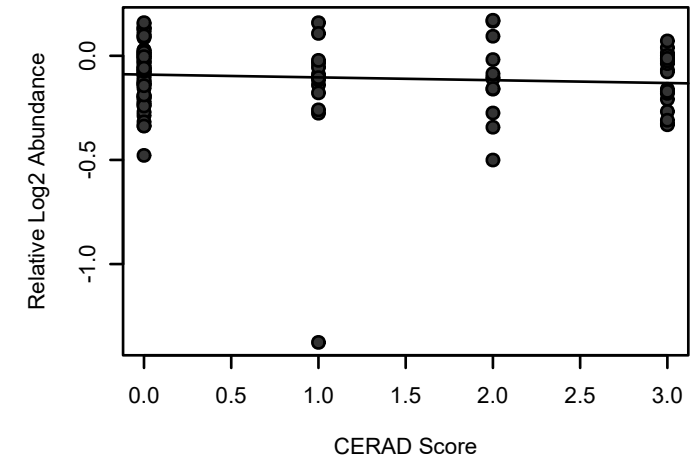

**ATP6V1A UPenn Mixed PRM**  
M1 turquoise MEGA module member  
K-W ANOVA p: 0.15

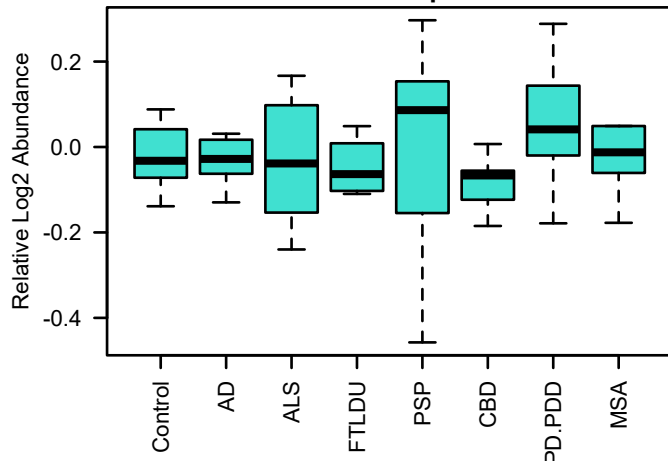

**ATP6V1A UPenn Mixed PRM**  
K-W ANOVA p: 0.31

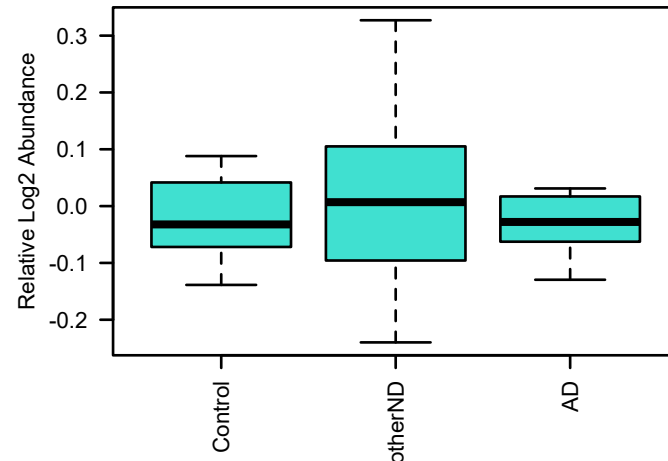

**bicor=0.052, p=0.64**  
**cor=0.0036, p=0.97**

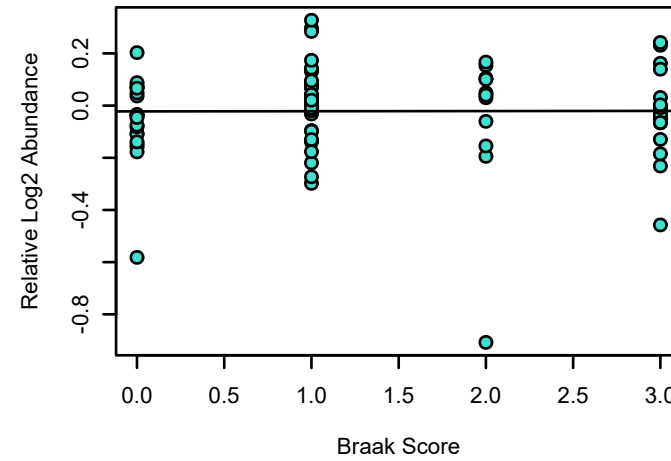

**bicor=0.14, p=0.15**  
**cor=0.097, p=0.34**

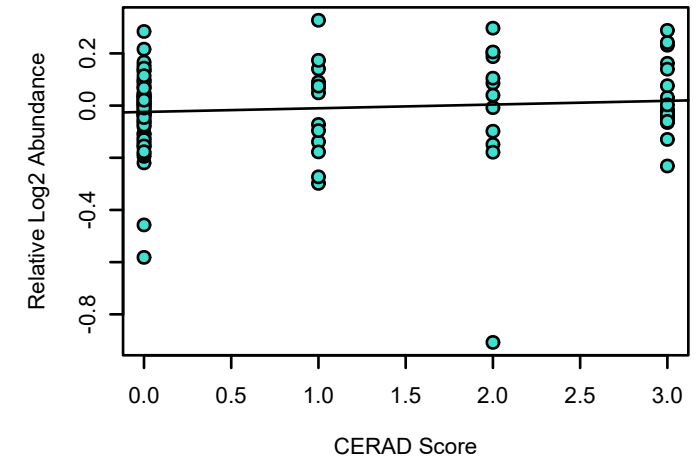

**GRIA2 UPenn Mixed PRM**  
M1 turquoise MEGA module member  
K-W ANOVA p: 7.7e-05

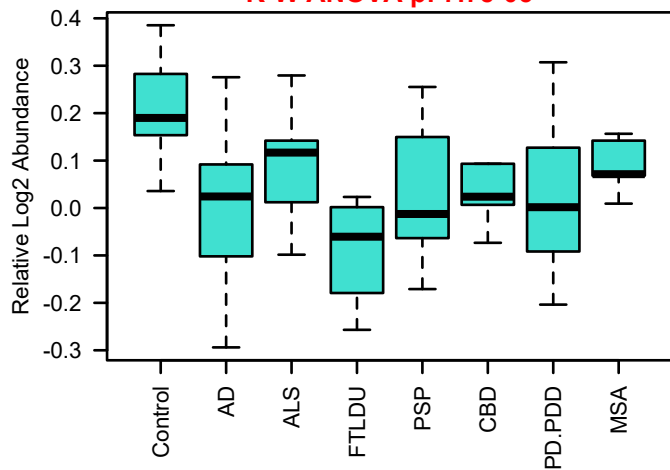

**GRIA2 UPenn Mixed PRM**  
K-W ANOVA p: 3.4e-05

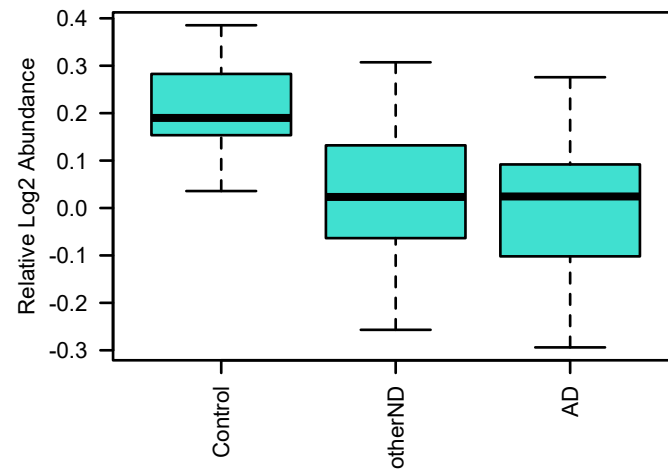

**bicor=-0.3, p=0.005**  
**cor=-0.29, p=0.0075**

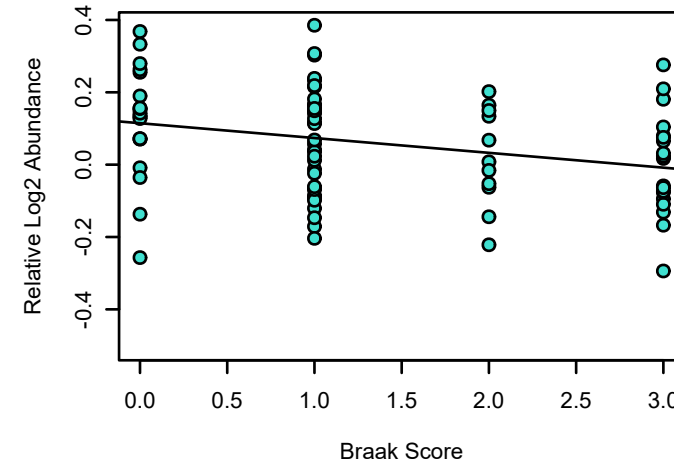

**bicor=-0.12, p=0.25**  
**cor=-0.11, p=0.28**

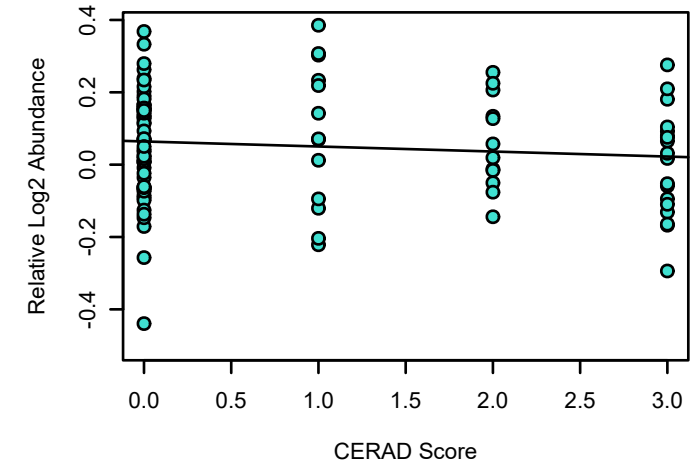

**UQCRFS1 UPenn Mixed PRM**  
M3 brown MEGA module member  
K-W ANOVA p: 0.5

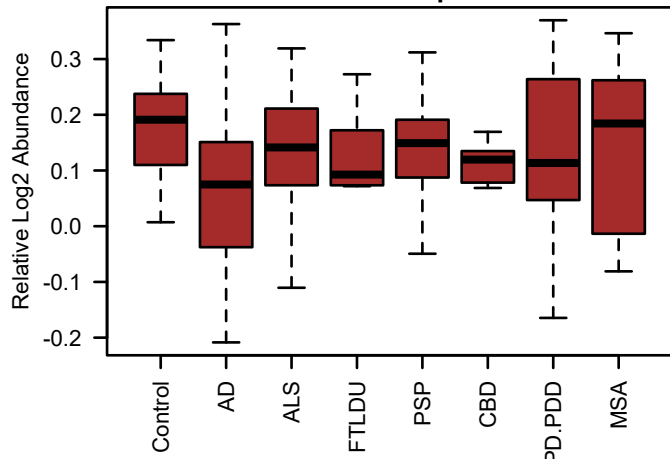

**UQCRFS1 UPenn Mixed PRM**  
K-W ANOVA p: 0.059

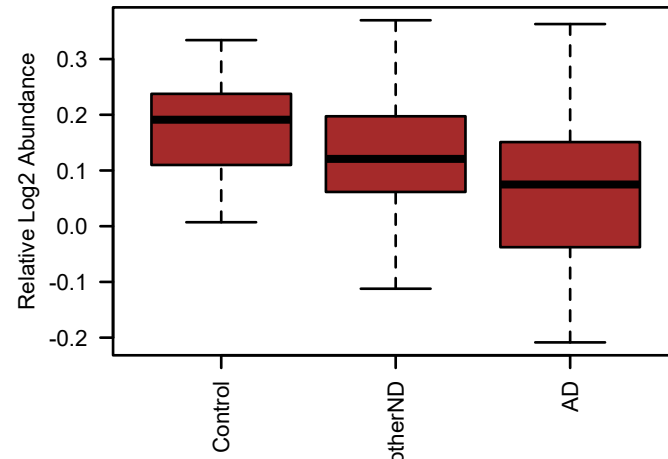

**bicor=-0.19, p=0.085**  
**cor=-0.2, p=0.068**

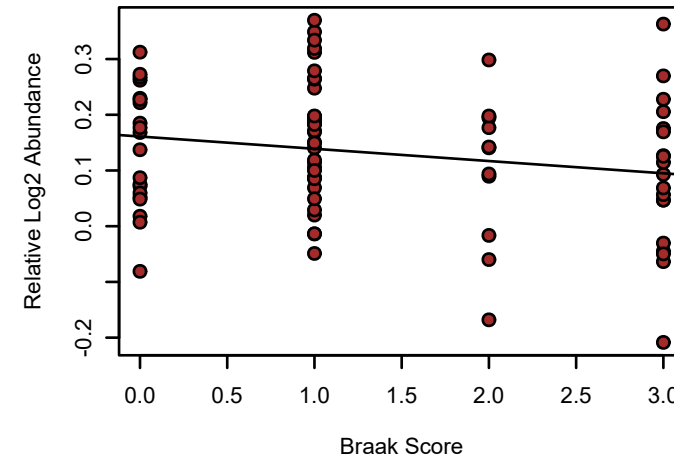

**bicor=-0.18, p=0.075**  
**cor=-0.17, p=0.091**

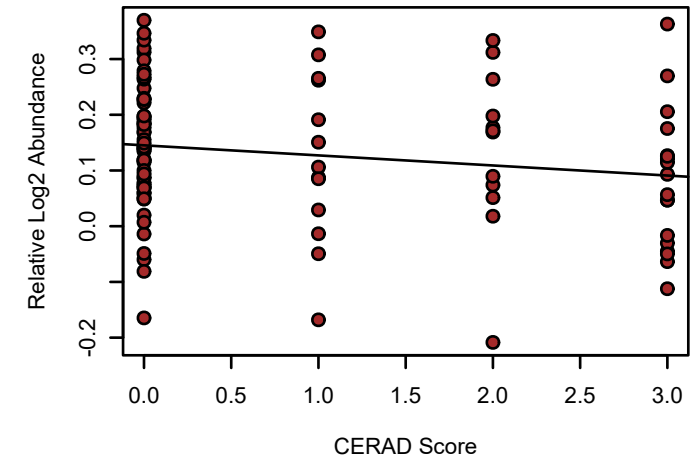

**CCT5 UPenn Mixed PRM**  
M11 greenyellow MEGA module member  
K-W ANOVA p: 0.017

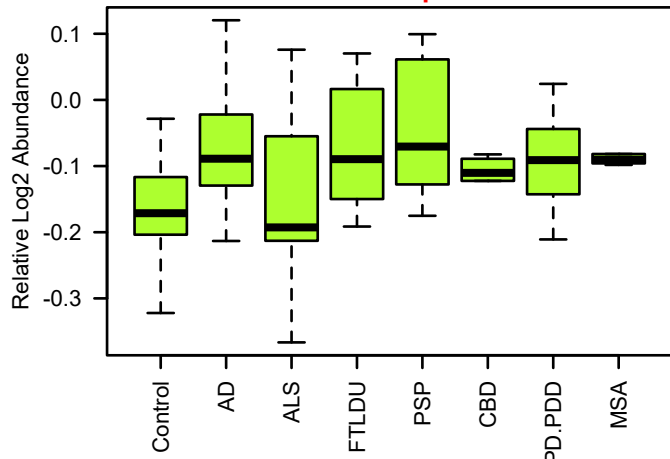

**CCT5 UPenn Mixed PRM**  
K-W ANOVA p: 0.042

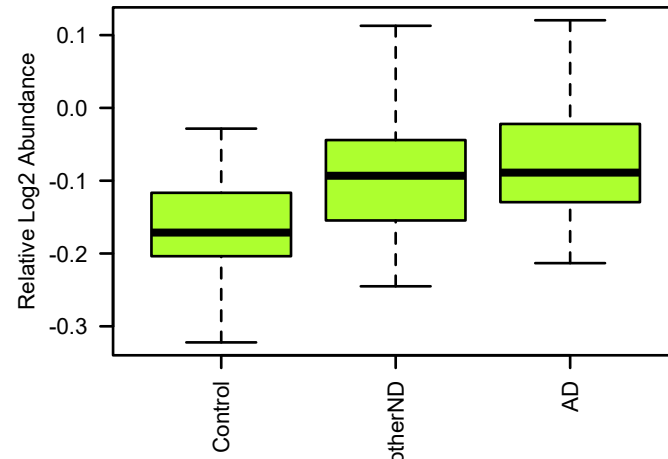

**bicor=0.24, p=0.025**  
**cor=0.27, p=0.013**

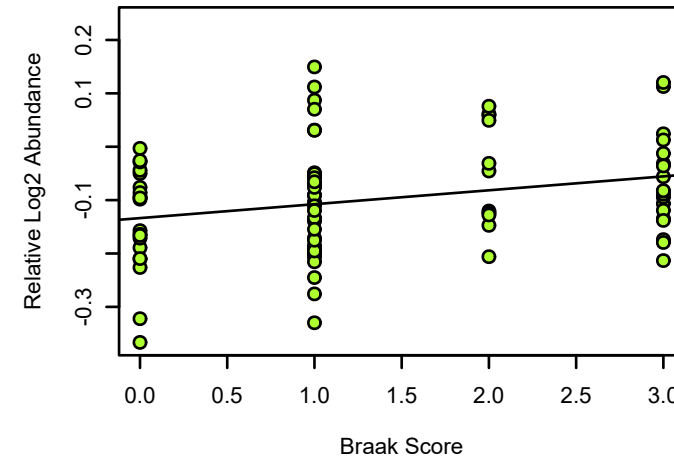

**bicor=0.26, p=0.0084**  
**cor=0.27, p=0.0066**

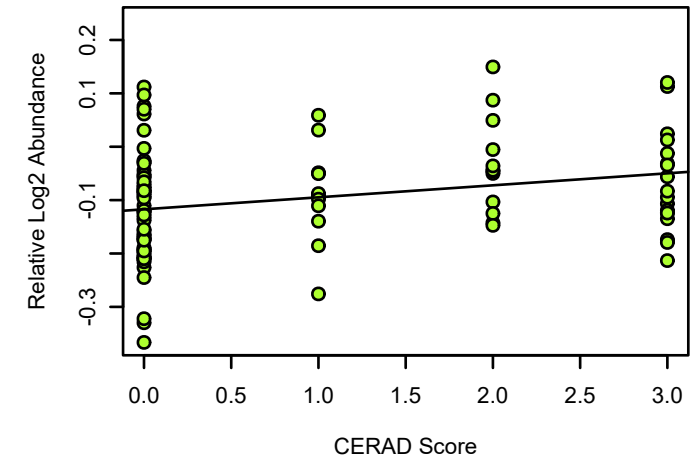

**IDH2 UPenn Mixed PRM**  
M1 turquoise MEGA module member  
K-W ANOVA p: 0.001

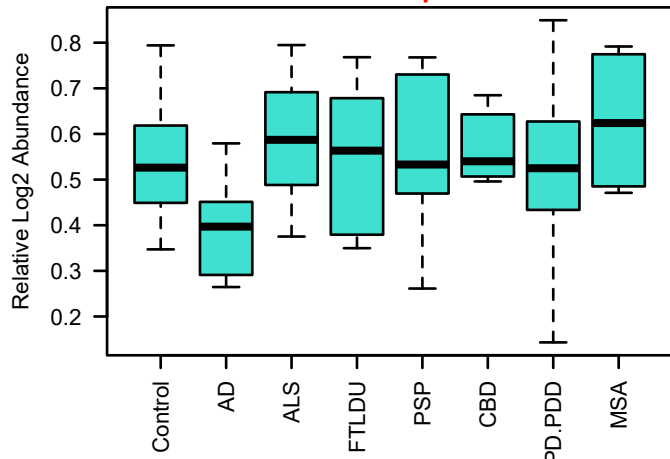

**IDH2 UPenn Mixed PRM**  
K-W ANOVA p: 2.4e-05

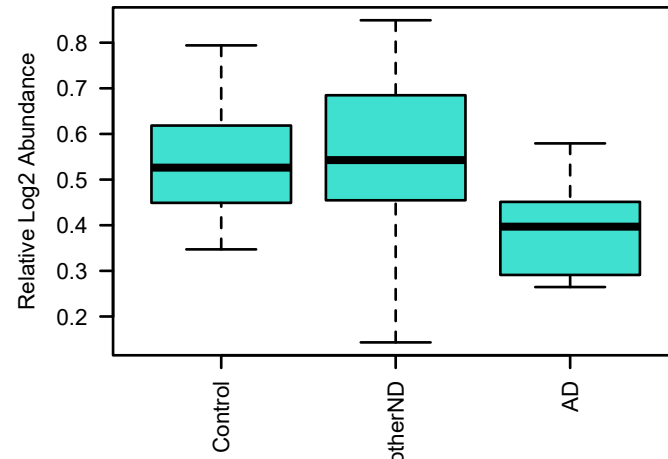

**bicor=-0.22, p=0.049**  
**cor=-0.29, p=0.0075**

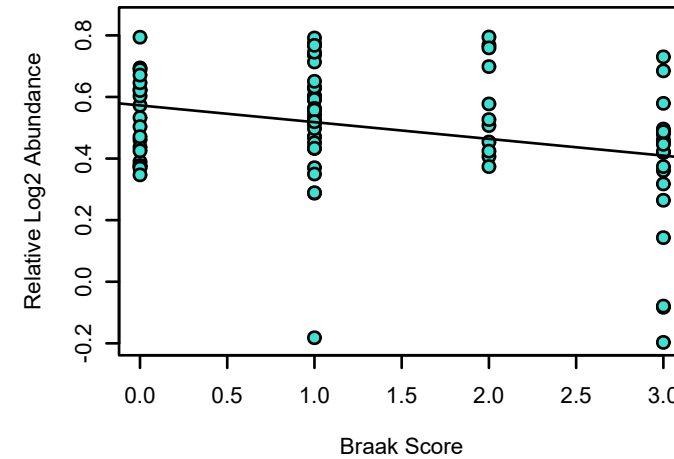

**bicor=-0.33, p=0.00071**  
**cor=-0.38, p=9.6e-05**

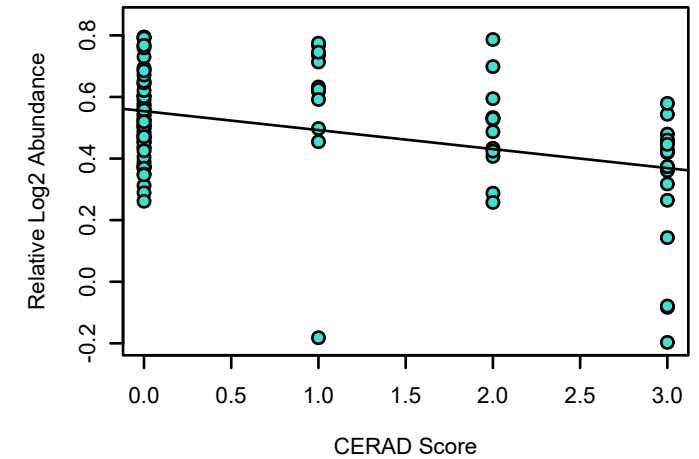

**TUFM UPenn Mixed PRM**  
**M3 brown MEGA module member**  
**K-W ANOVA p: 0.13**

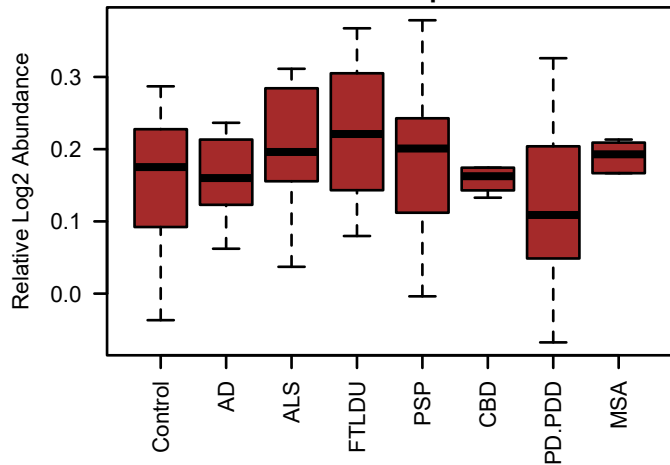

**TUFM UPenn Mixed PRM**  
**K-W ANOVA p: 0.88**

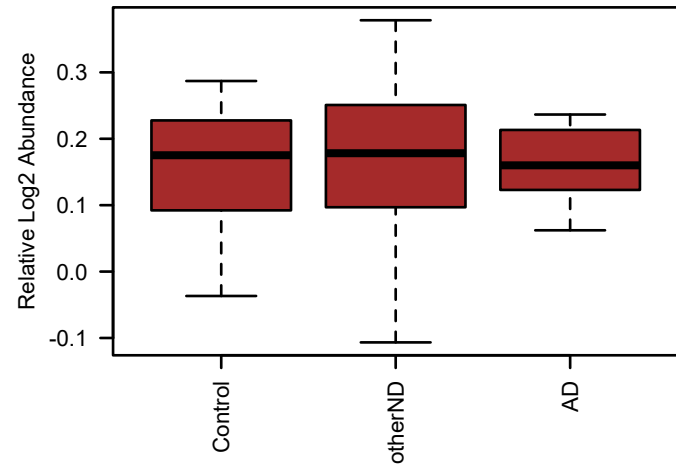

**bicor=-0.16, p=0.15**  
**cor=-0.12, p=0.28**

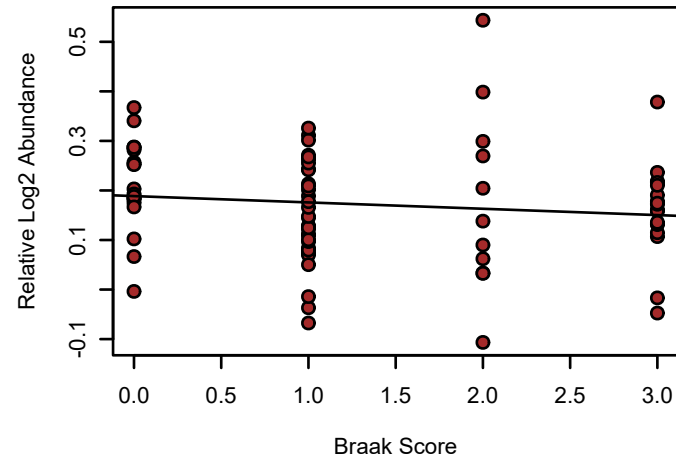

**bicor=-0.21, p=0.036**  
**cor=-0.21, p=0.036**

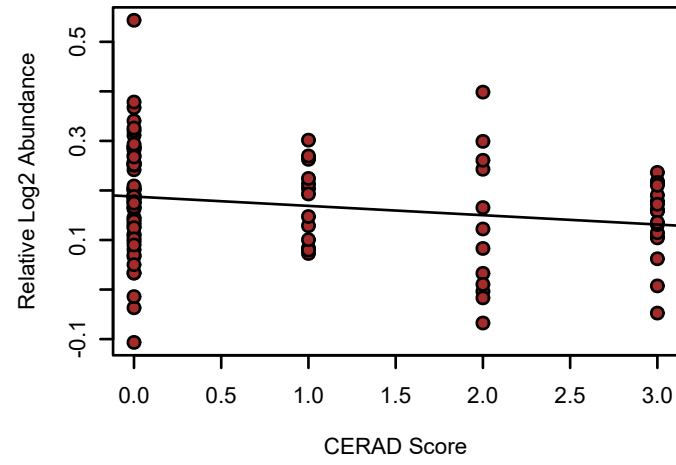

**RGS7 UPenn Mixed PRM**  
**M1 turquoise MEGA module member**  
**K-W ANOVA p: 1.1e-05**

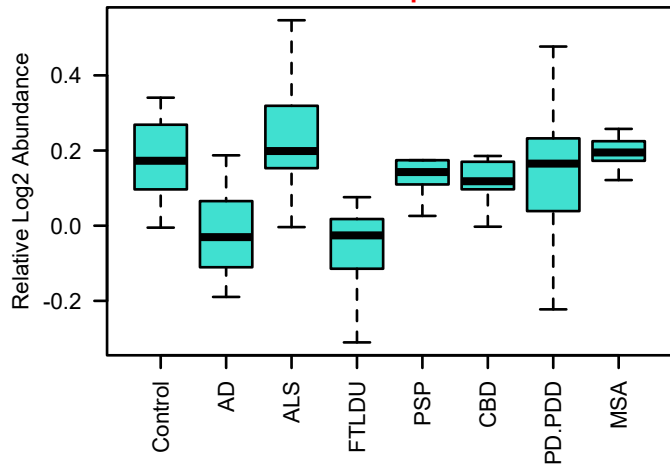

**RGS7 UPenn Mixed PRM**  
**K-W ANOVA p: 0.00012**

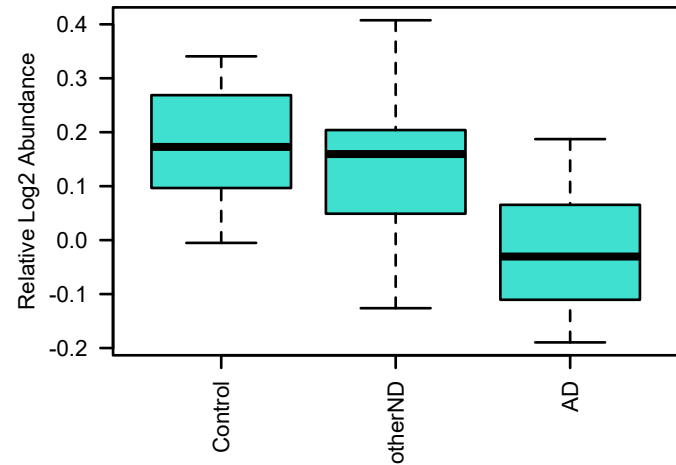

**bicor=-0.3, p=0.0054**  
**cor=-0.3, p=0.0056**

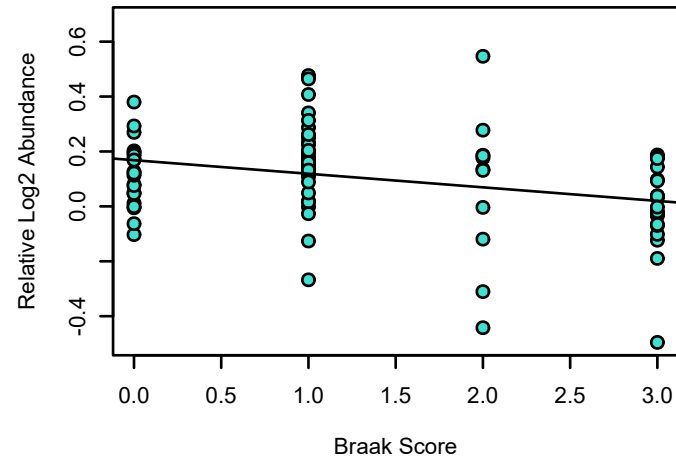

**bicor=-0.35, p=0.00036**  
**cor=-0.35, p=0.00036**

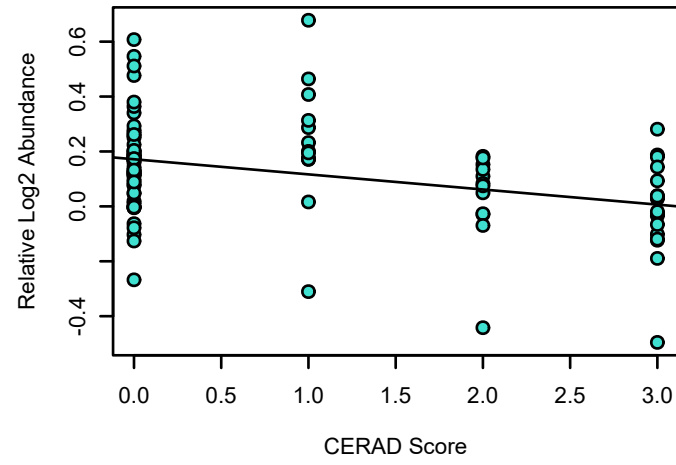

**CCT8 UPenn Mixed PRM**  
**M11 greenyellow MEGA module member**  
**K-W ANOVA p: 6e-04**

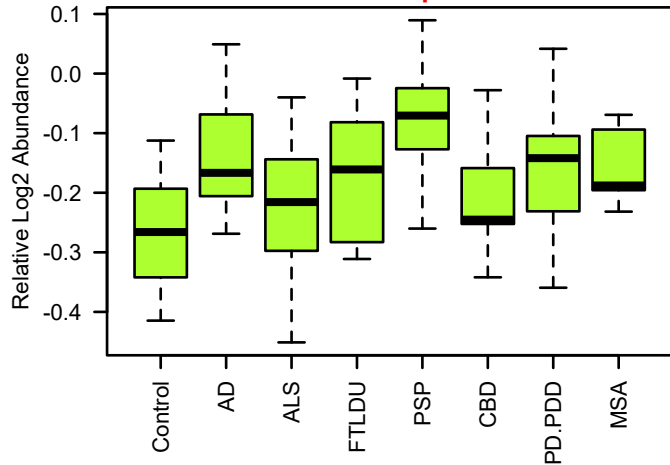

**CCT8 UPenn Mixed PRM**  
**K-W ANOVA p: 0.003**

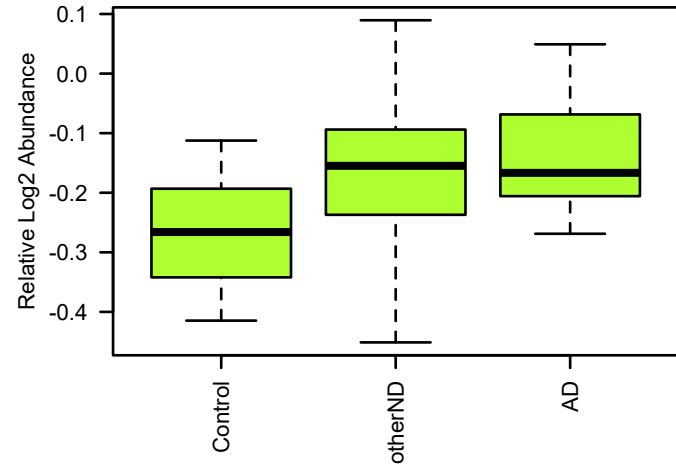

**bicor=0.26, p=0.019**  
**cor=0.23, p=0.035**

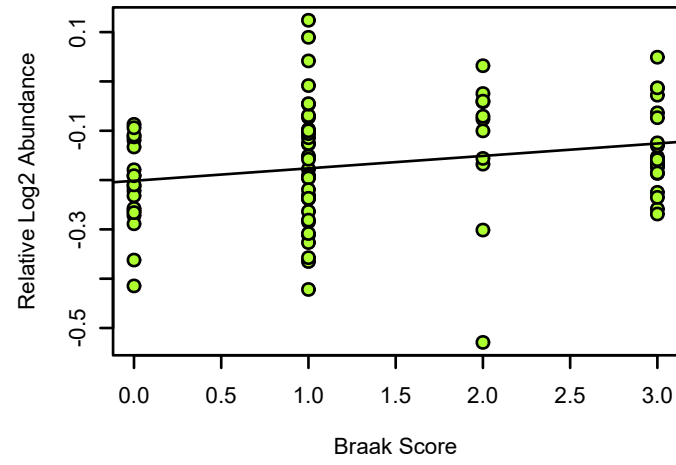

**bicor=0.073, p=0.47**  
**cor=0.062, p=0.54**

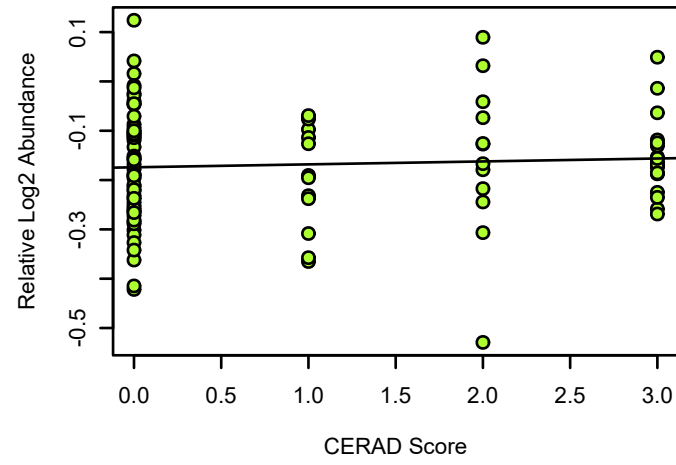

**PLCD1 UPenn Mixed PRM**  
**M4 yellow MEGA module member**  
**K-W ANOVA p: 5.3e-06**

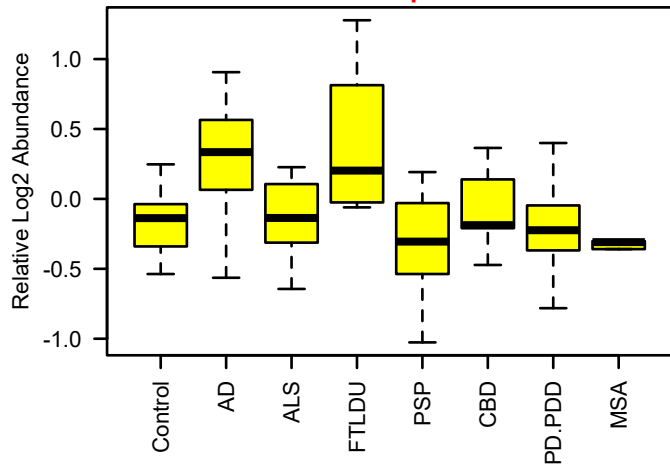

**PLCD1 UPenn Mixed PRM**  
**K-W ANOVA p: 0.00045**

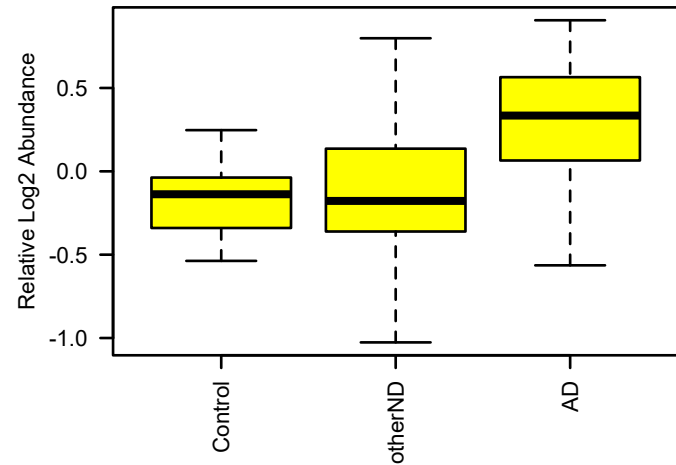

**bicor=0.31, p=0.0046**  
**cor=0.31, p=0.0041**

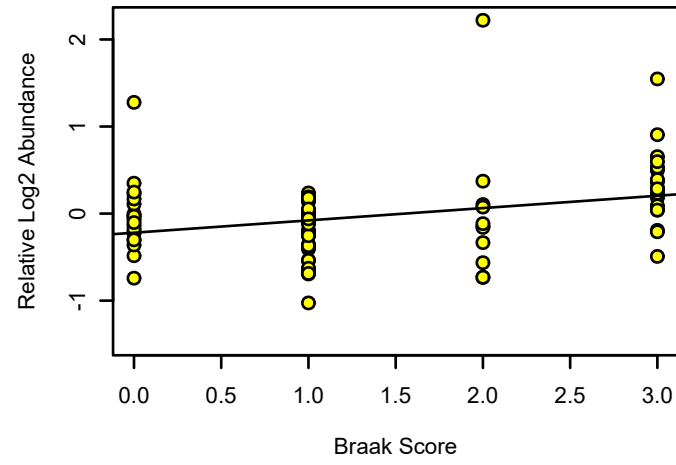

**bicor=0.39, p=6.3e-05**  
**cor=0.34, p=0.00054**

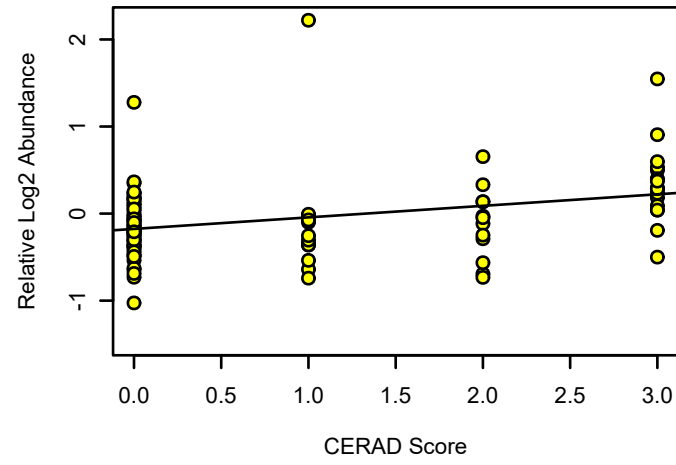

**NDUFA8 UPenn Mixed PRM**  
**M3 brown MEGA module member**  
**K-W ANOVA p: 0.011**

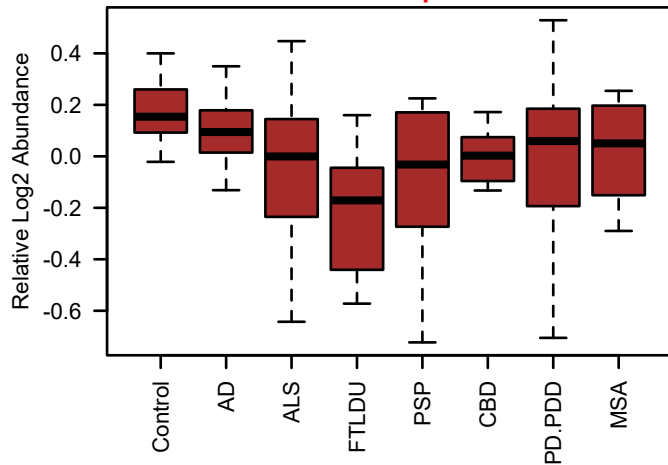

**NDUFA8 UPenn Mixed PRM**  
**K-W ANOVA p: 0.0019**

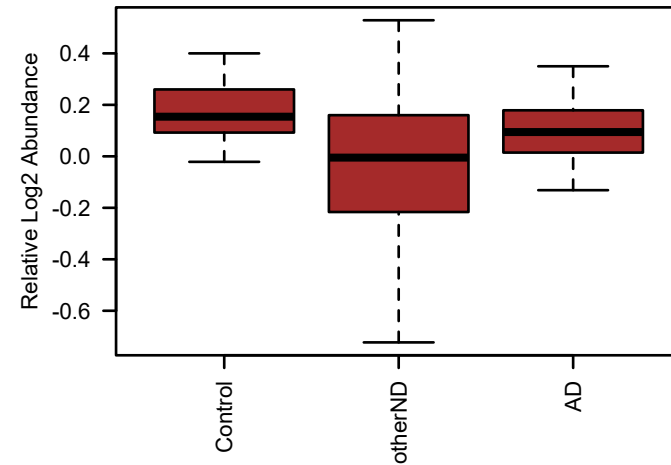

**bicor=-0.076, p=0.49**  
**cor=-0.016, p=0.89**

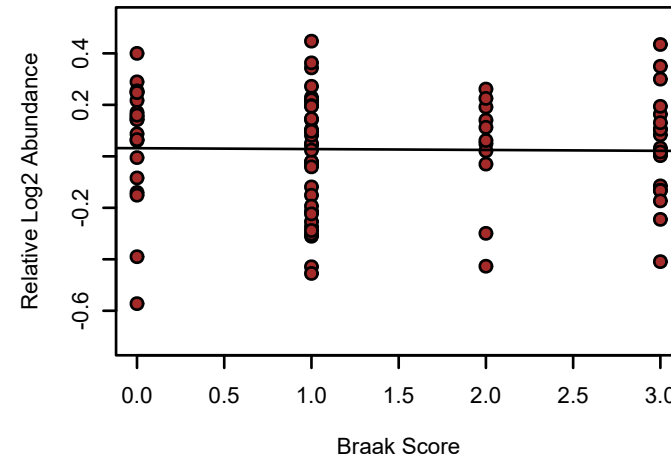

**bicor=0.1, p=0.32**  
**cor=0.12, p=0.23**

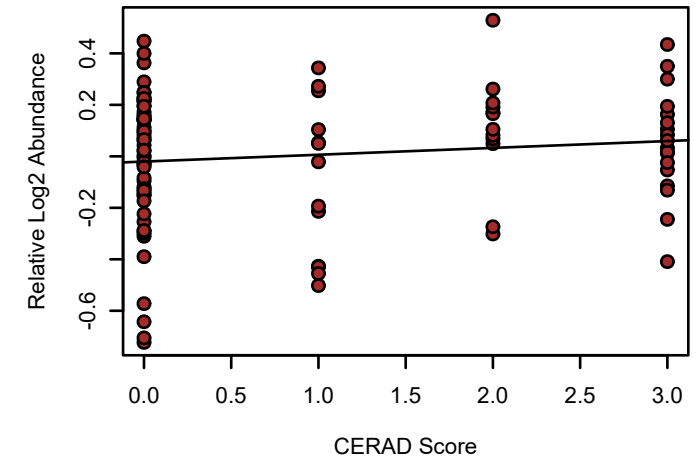

**HNRNPA3 UPenn Mixed PRM**  
**M10 purple MEGA module member**  
**K-W ANOVA p: 0.0052**

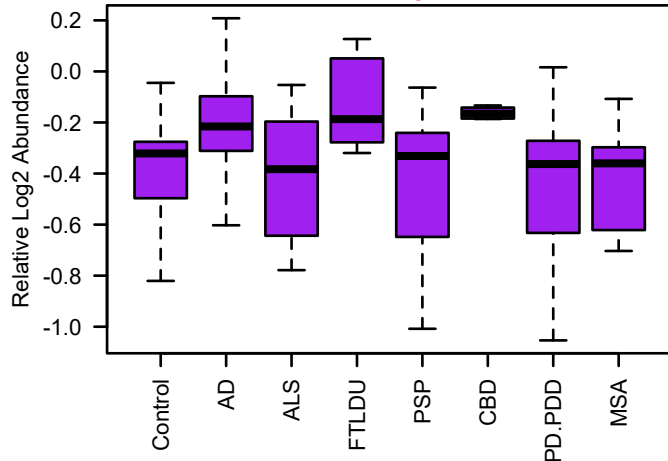

**HNRNPA3 UPenn Mixed PRM**  
**K-W ANOVA p: 0.031**

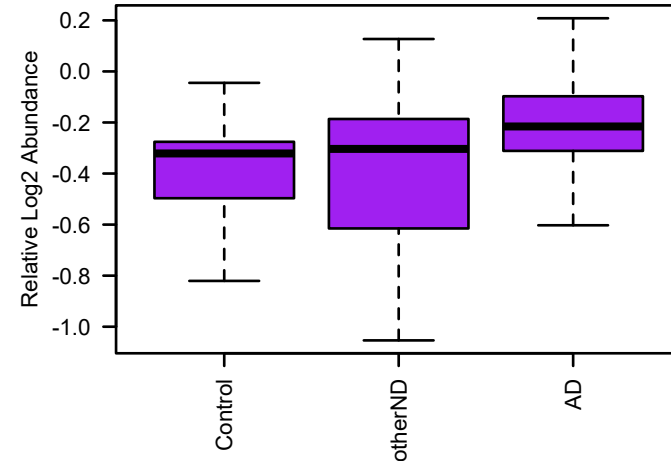

**bicor=0.16, p=0.14**  
**cor=0.22, p=0.044**

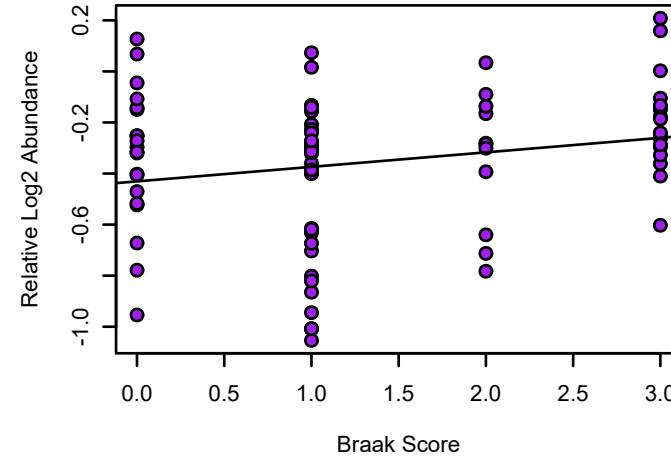

**bicor=0.17, p=0.085**  
**cor=0.19, p=0.058**

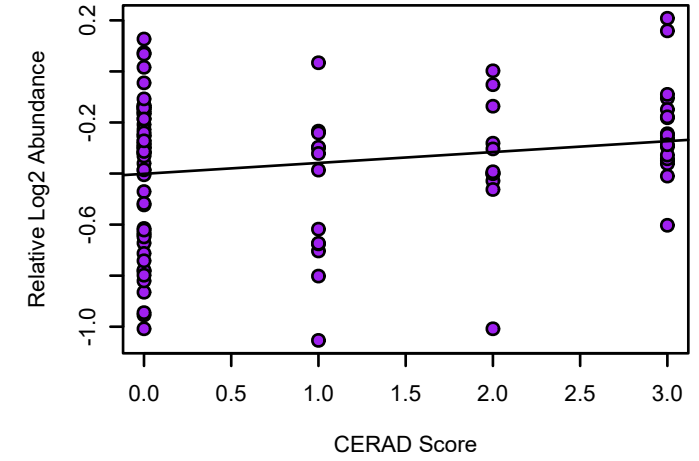

**CACNA2D1 UPenn Mixed PRM**  
**M1 turquoise MEGA module member**  
**K-W ANOVA p: 0.11**

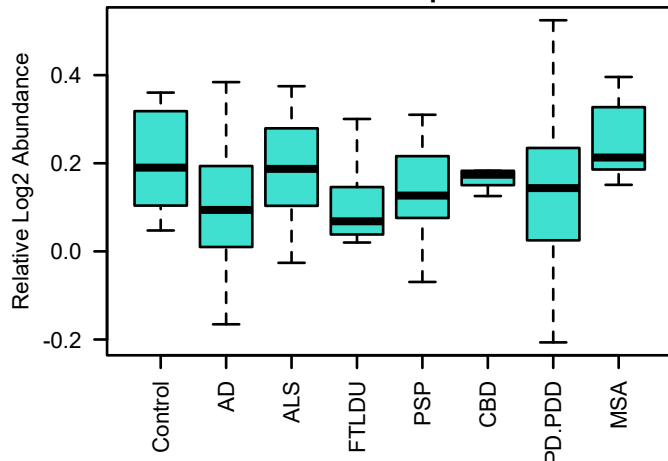

**CACNA2D1 UPenn Mixed PRM**  
**K-W ANOVA p: 0.061**

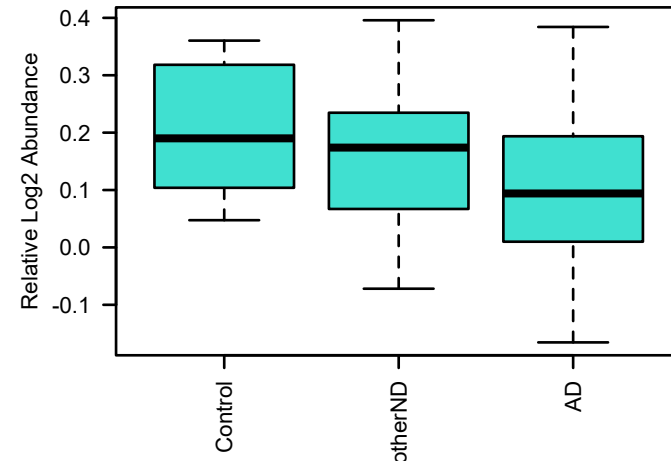

**bicor=-0.079, p=0.47**  
**cor=-0.13, p=0.24**

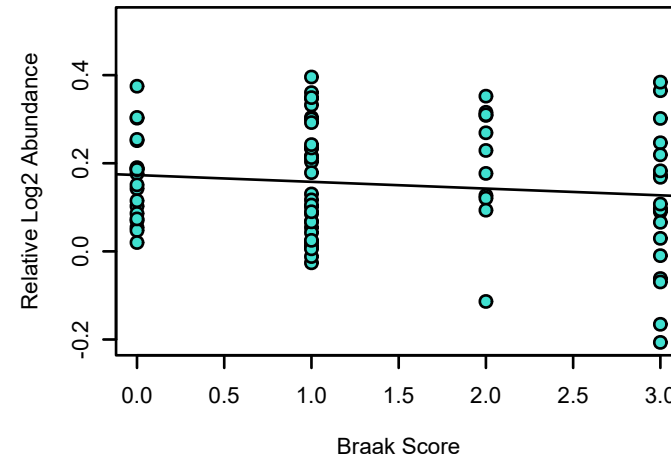

**bicor=-0.11, p=0.29**  
**cor=-0.13, p=0.2**

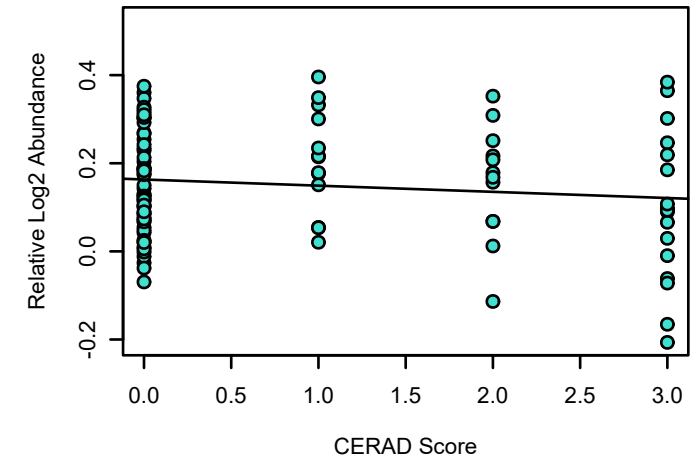

**YARS UPenn Mixed PRM**  
**NA grey MEGA module member**  
**K-W ANOVA p: 0.067**

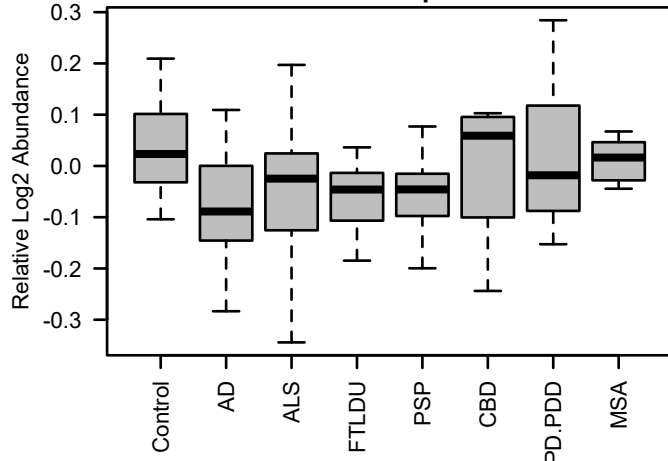

**YARS UPenn Mixed PRM**  
**K-W ANOVA p: 0.047**

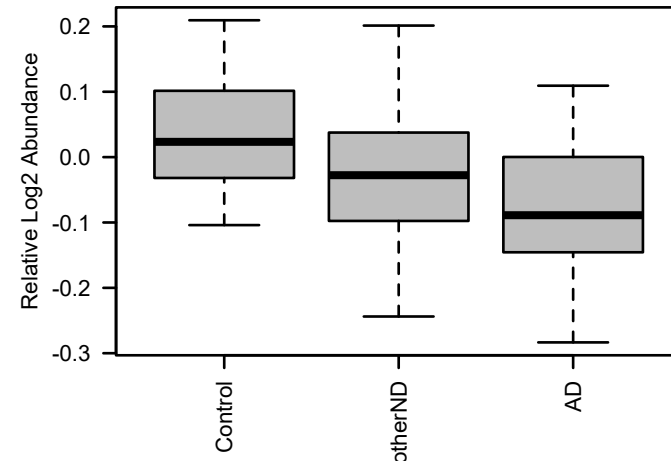

**bicor=-0.14, p=0.21**  
**cor=-0.13, p=0.24**

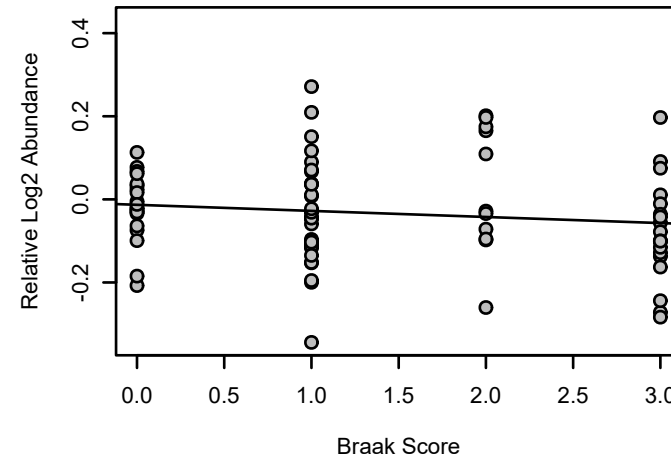

**bicor=-0.074, p=0.47**  
**cor=-0.076, p=0.45**

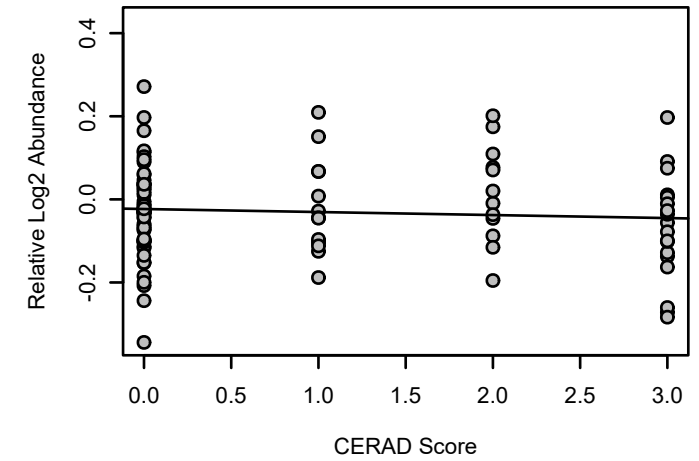

**NAPA UPenn Mixed PRM**  
**M12 tan MEGA module member**  
**K-W ANOVA p: 7.2e-06**

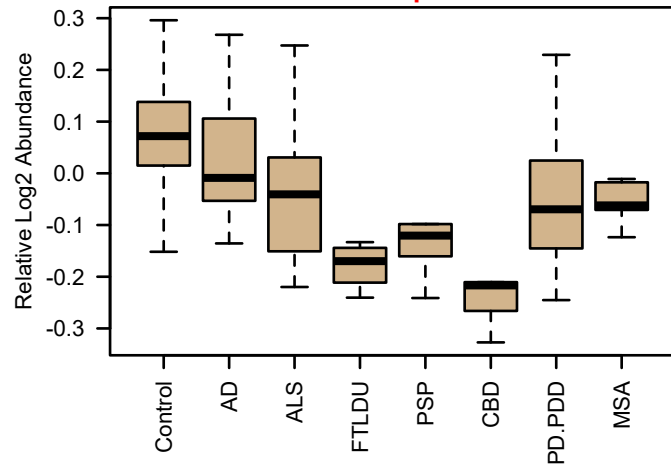

**NAPA UPenn Mixed PRM**  
**K-W ANOVA p: 7e-06**

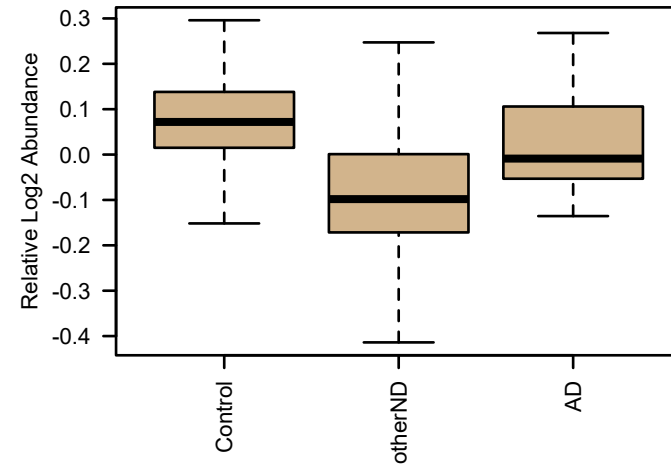

**bicor=-0.01, p=0.93**  
**cor=-0.023, p=0.84**

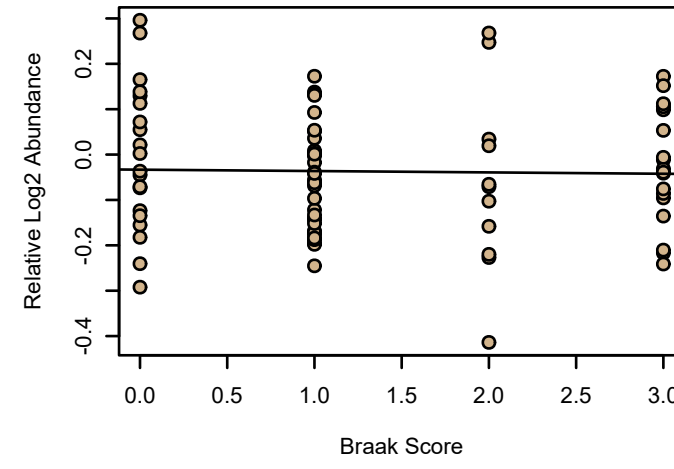

**bicor=0.15, p=0.13**  
**cor=0.14, p=0.16**

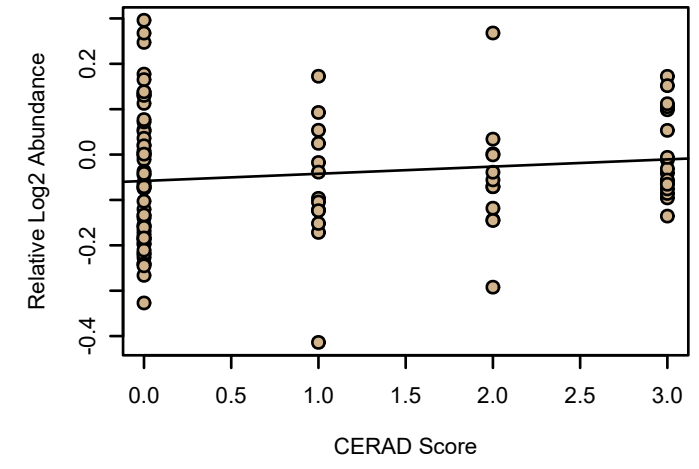

**VCP UPenn Mixed PRM**  
**M4 yellow MEGA module member**  
**K-W ANOVA p: 0.00057**

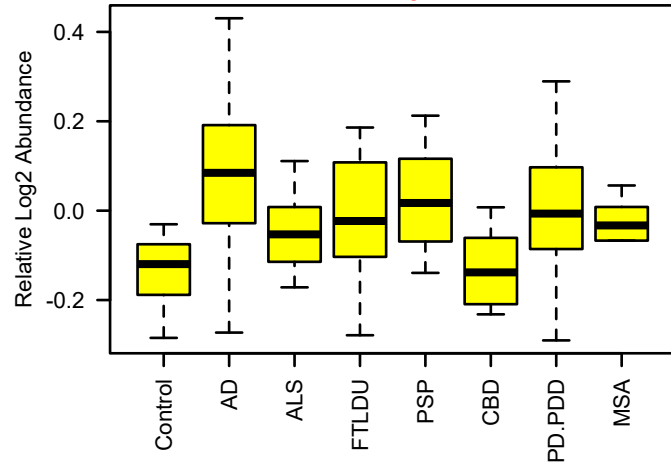

**VCP UPenn Mixed PRM**  
**K-W ANOVA p: 5.9e-05**

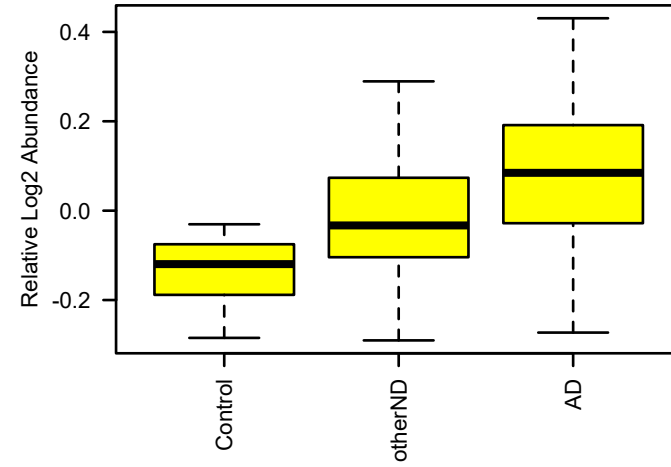

**bicor=0.37, p=0.00051**  
**cor=0.38, p=0.00036**

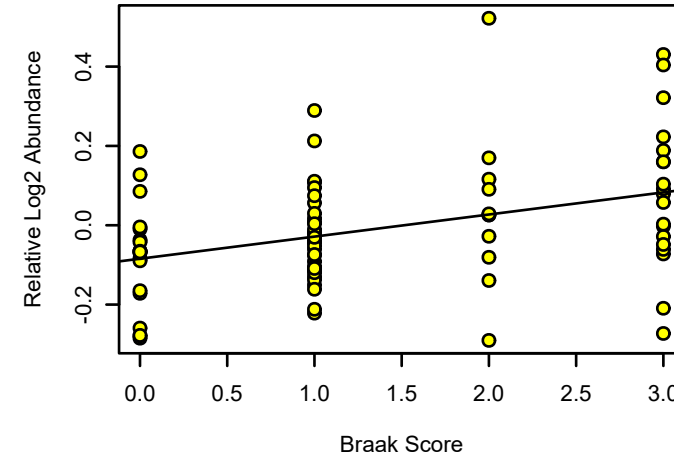

**bicor=0.34, p=0.00062**  
**cor=0.33, p=8e-04**

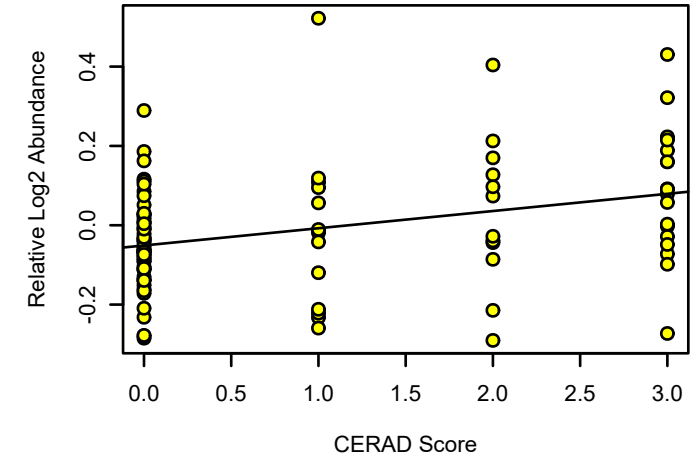

**HNRNPH2 UPenn Mixed PRM**  
**M10 purple MEGA module member**  
**K-W ANOVA p: 0.69**

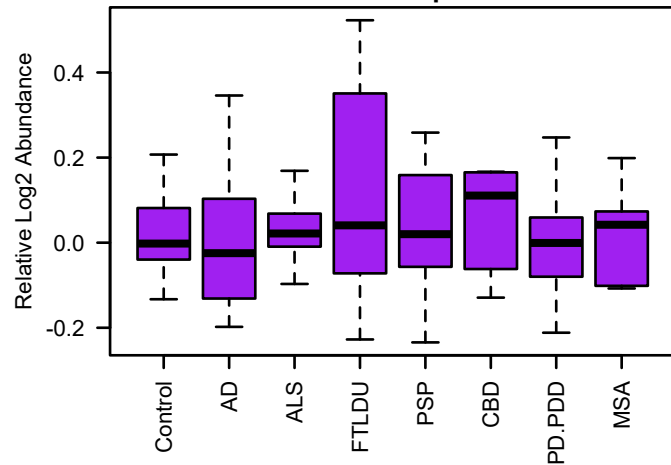

**HNRNPH2 UPenn Mixed PRM**  
**K-W ANOVA p: 0.82**

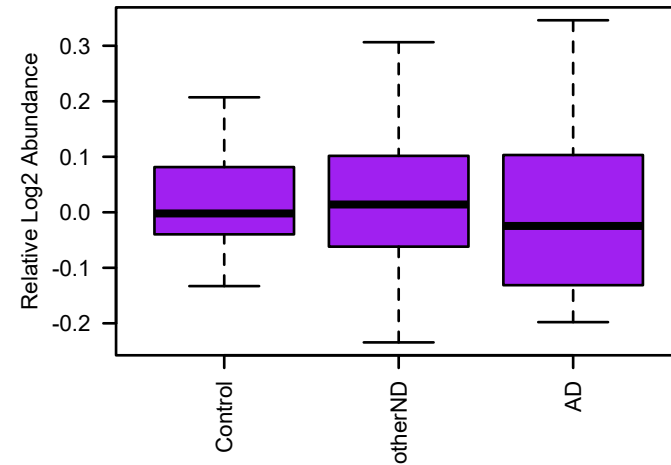

**bicor=-0.045, p=0.69**  
**cor=-0.063, p=0.57**

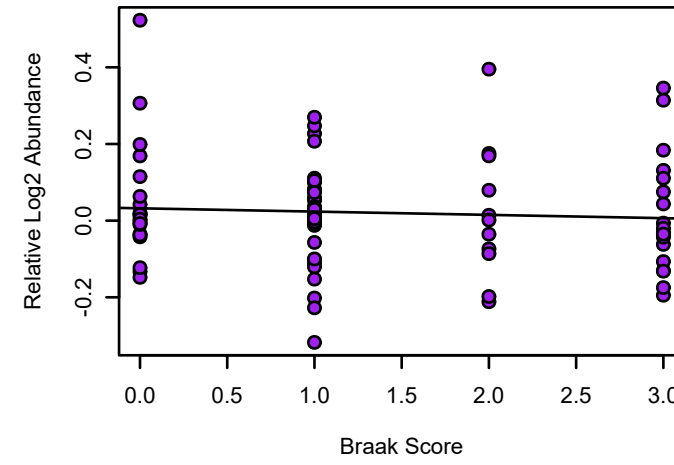

**bicor=-0.017, p=0.87**  
**cor=-0.0094, p=0.93**

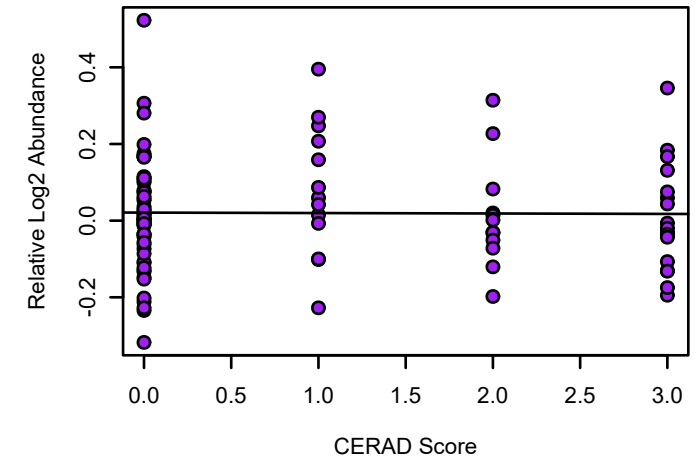

**RPS3A UPenn Mixed PRM**  
**M7 black MEGA module member**  
**K-W ANOVA p: 0.015**

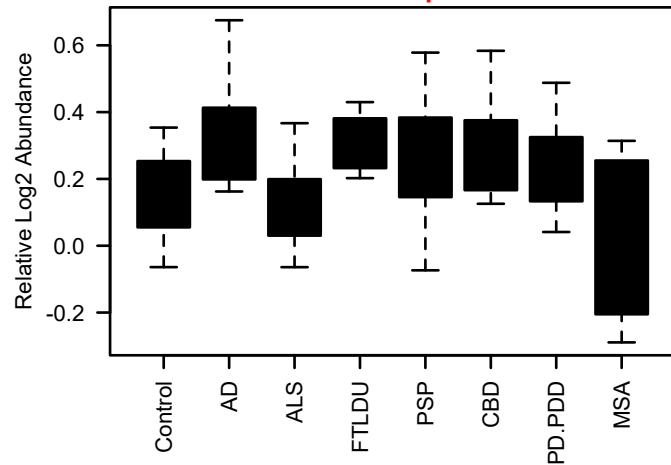

**RPS3A UPenn Mixed PRM**  
**K-W ANOVA p: 0.023**

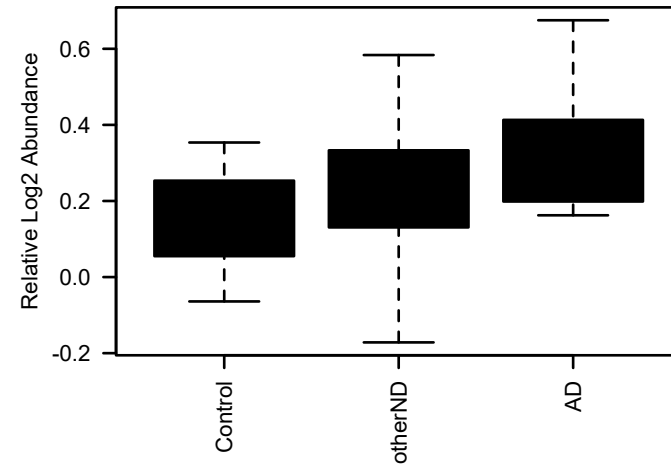

**bicor=0.23, p=0.037**  
**cor=0.24, p=0.028**

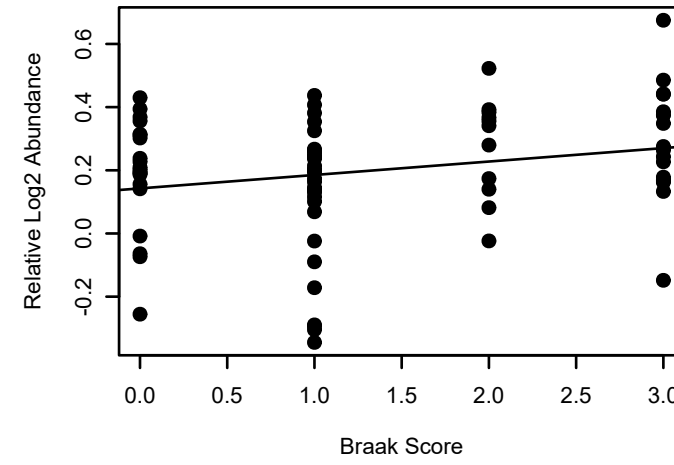

**bicor=0.077, p=0.45**  
**cor=0.087, p=0.39**

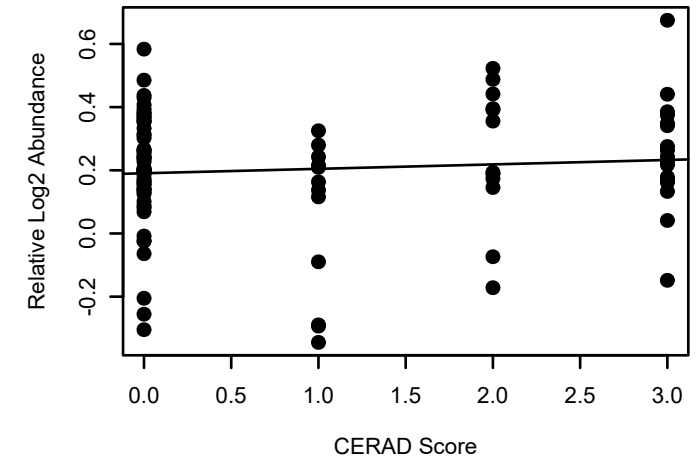

**ATP6V0D1 UPenn Mixed PRM**  
**M1 turquoise MEGA module member**  
**K-W ANOVA p: 0.35**

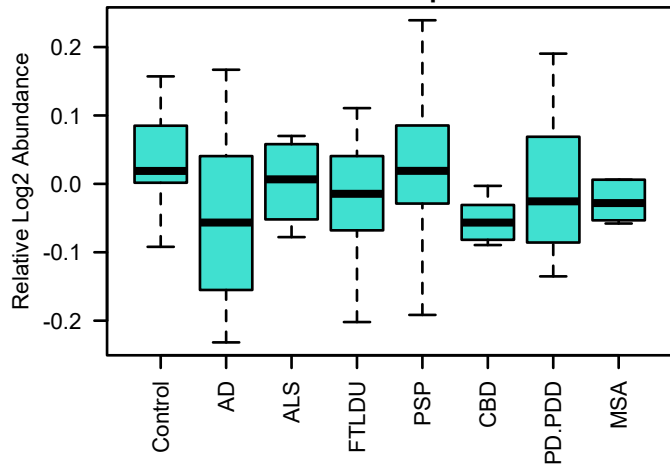

**ATP6V0D1 UPenn Mixed PRM**  
**K-W ANOVA p: 0.04**

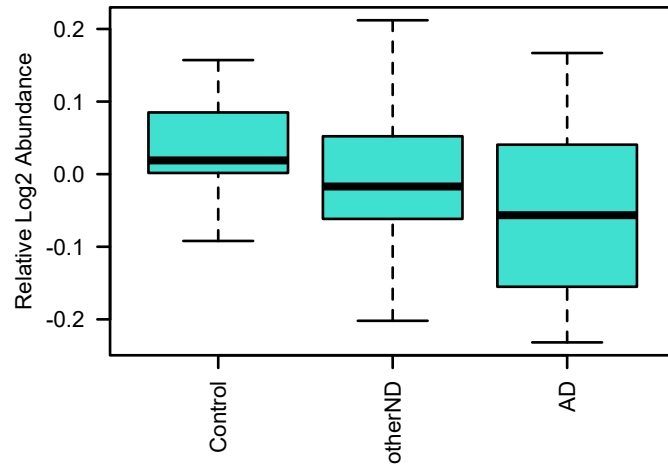

**bicor=-0.21, p=0.055**  
**cor=-0.16, p=0.15**

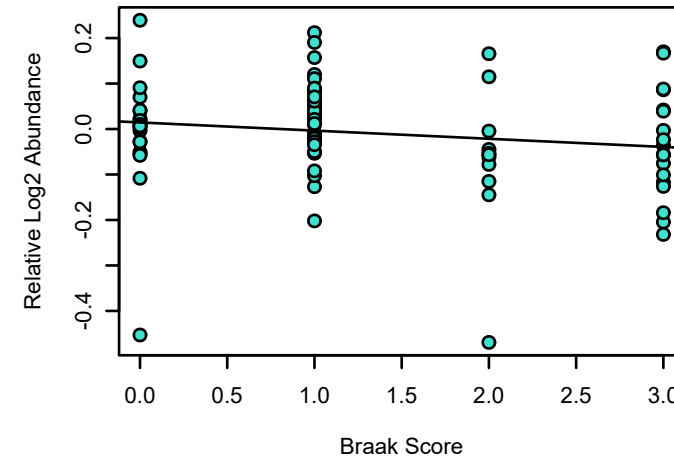

**bicor=-0.12, p=0.22**  
**cor=-0.1, p=0.32**

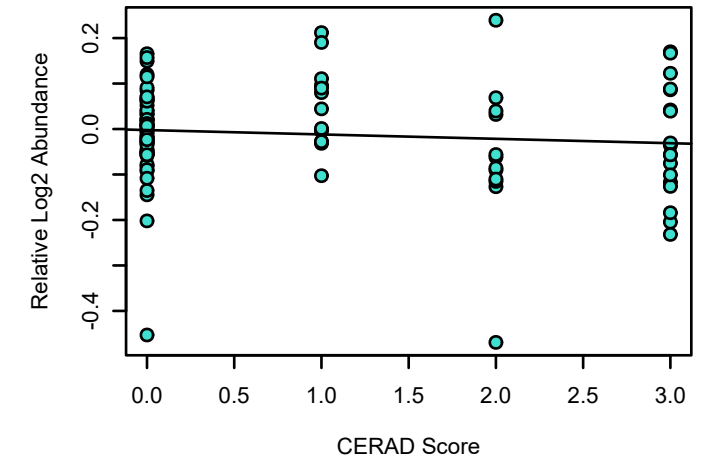

**HNRNPK UPenn Mixed PRM**  
**M10 purple MEGA module member**  
**K-W ANOVA p: 0.016**

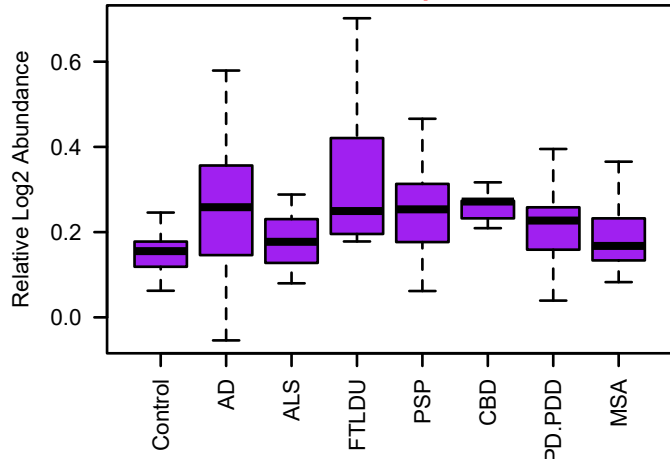

**HNRNPK UPenn Mixed PRM**  
**K-W ANOVA p: 0.076**

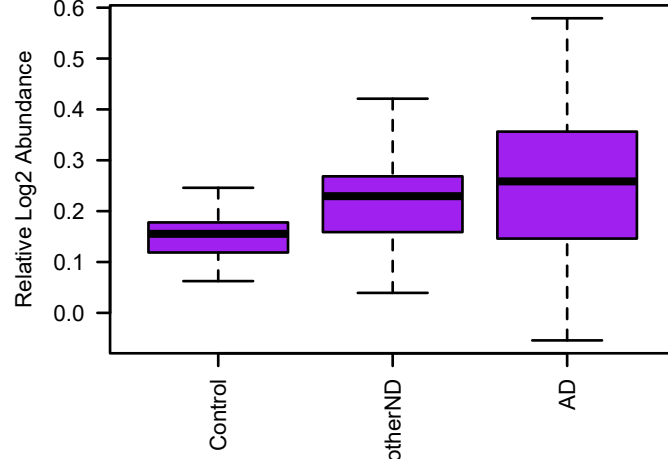

**bicor=0.2, p=0.063**  
**cor=0.25, p=0.022**

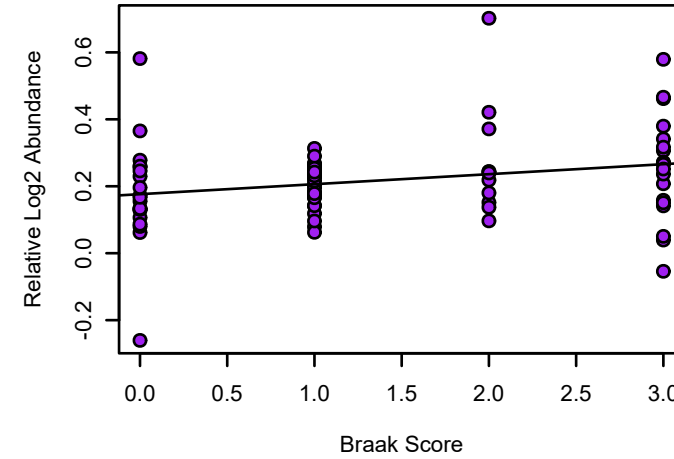

**bicor=0.089, p=0.38**  
**cor=0.1, p=0.32**

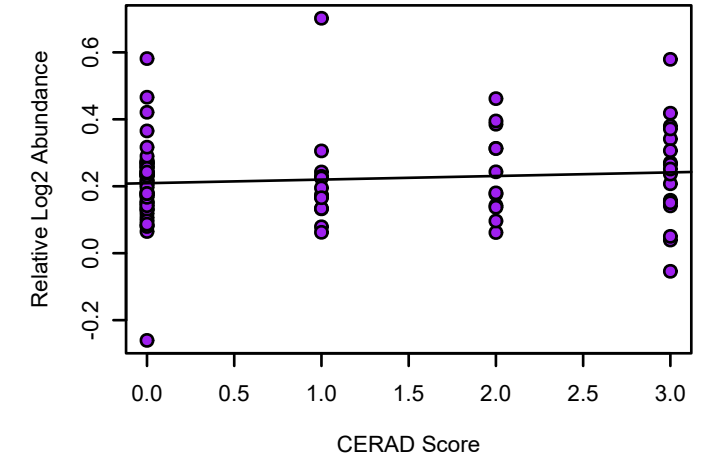

**PPIAL4E UPenn Mixed PRM**  
**NA grey20 MEGA module member**  
**K-W ANOVA p: 0.0045**

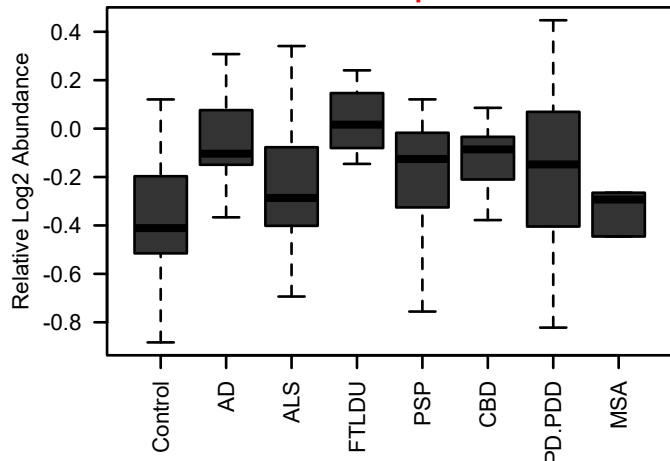

**PPIAL4E UPenn Mixed PRM**  
**K-W ANOVA p: 0.0047**

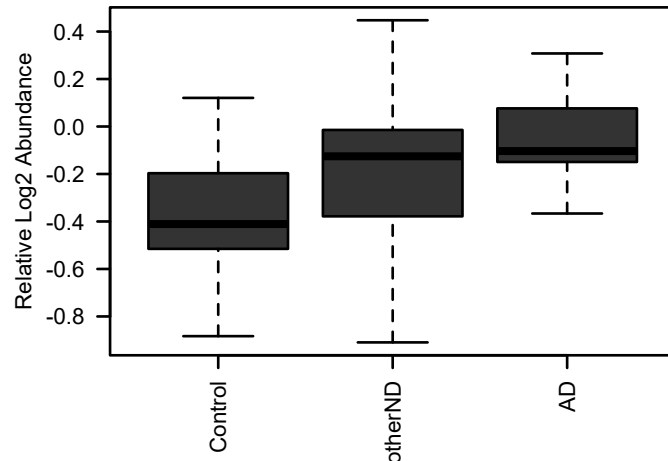

**bicor=0.16, p=0.14**  
**cor=0.23, p=0.035**

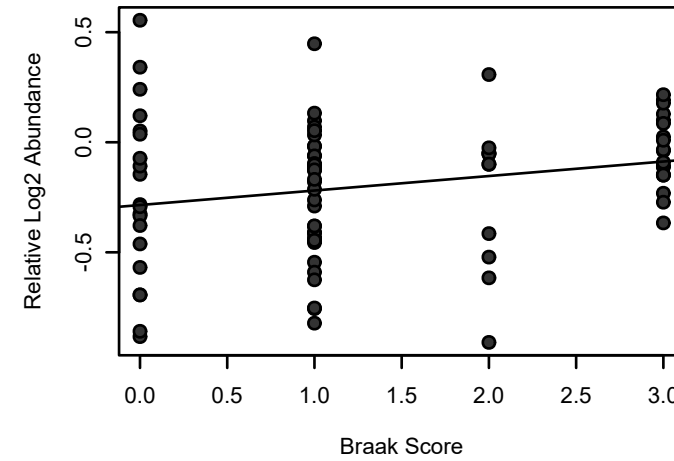

**bicor=0.17, p=0.089**  
**cor=0.17, p=0.091**

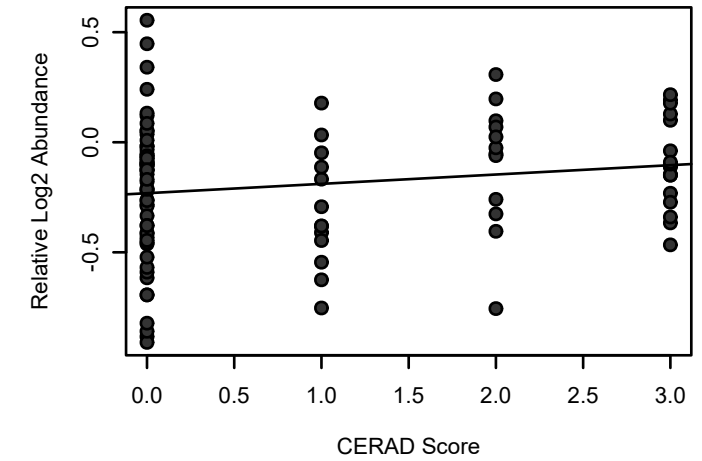

**PPIA UPenn Mixed PRM**  
**M2 blue MEGA module member**  
**K-W ANOVA p: 2.5e-07**

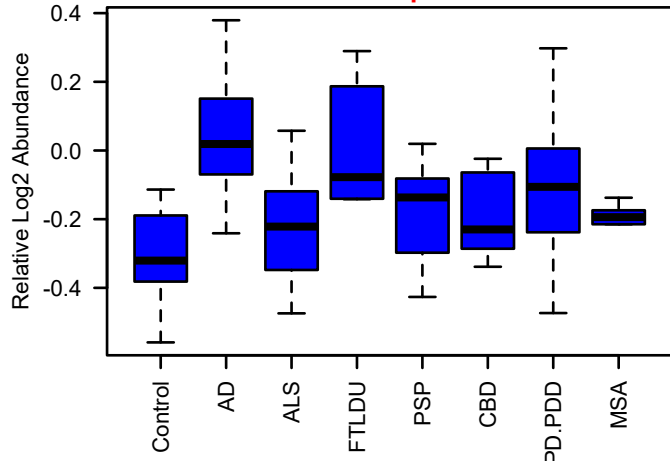

**PPIA UPenn Mixed PRM**  
**K-W ANOVA p: 5.1e-07**

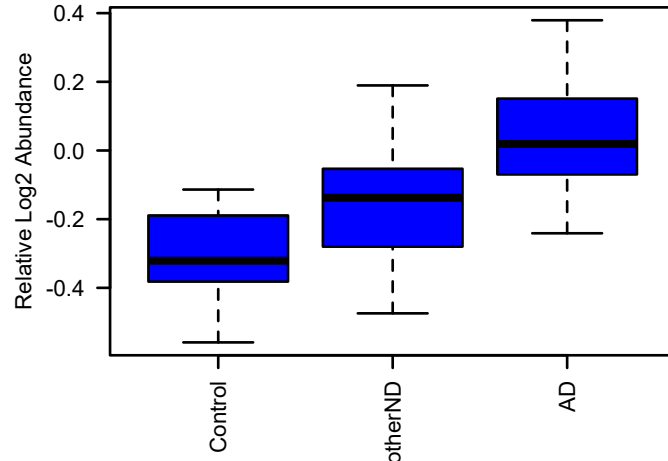

**bicor=0.41, p=0.00011**  
**cor=0.42, p=7e-05**

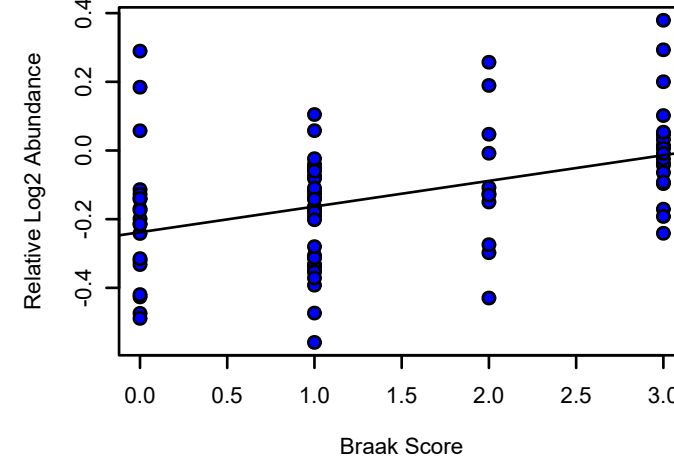

**bicor=0.4, p=3.2e-05**  
**cor=0.4, p=3.7e-05**

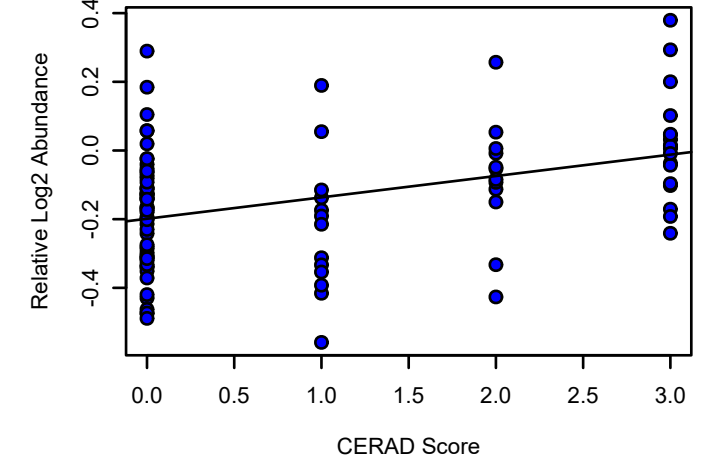

**RAC1 UPenn Mixed PRM**  
NA grey MEGA module member  
K-W ANOVA p: 0.23

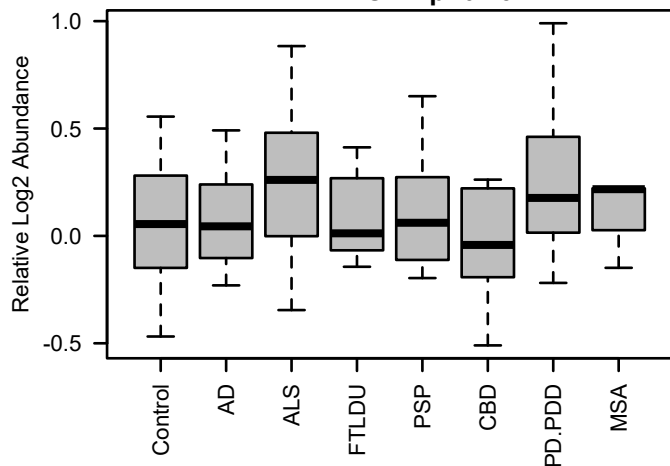

**RAC1 UPenn Mixed PRM**  
K-W ANOVA p: 0.19

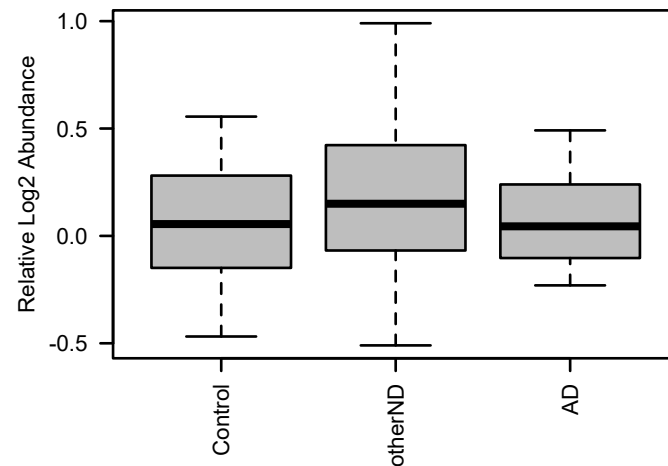

**bicor=-0.033, p=0.76**  
**cor=-0.057, p=0.61**

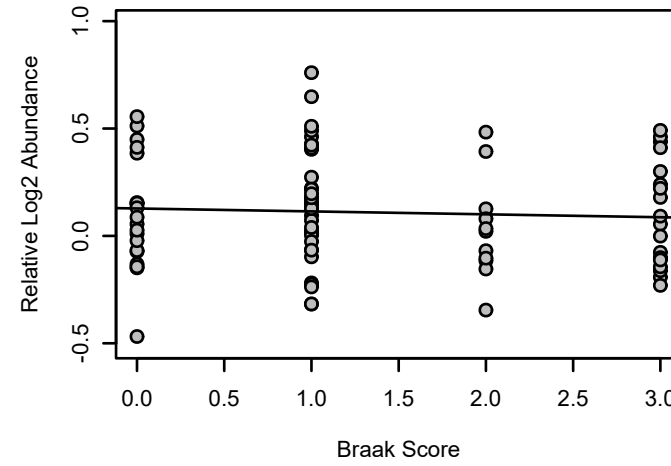

**bicor=0.07, p=0.49**  
**cor=0.059, p=0.56**

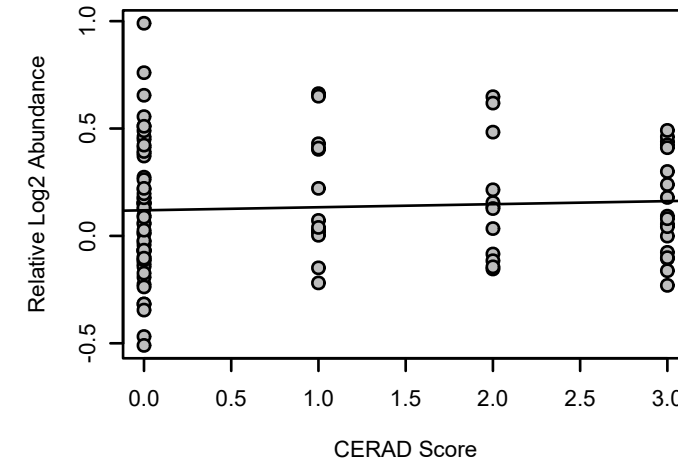

**AP2B1 UPenn Mixed PRM**  
M1 turquoise MEGA module member  
K-W ANOVA p: 0.0029

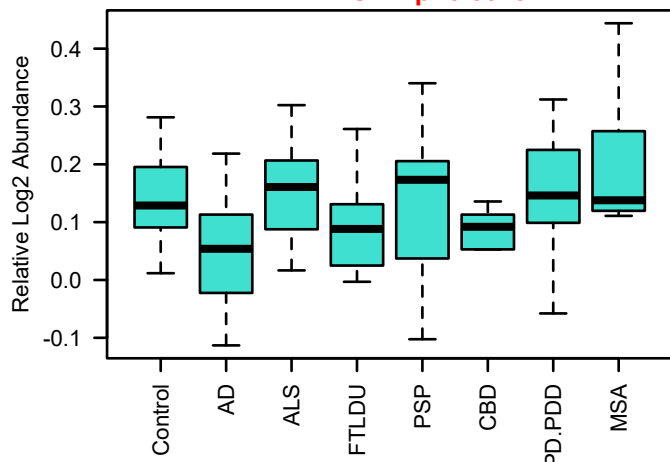

**AP2B1 UPenn Mixed PRM**  
K-W ANOVA p: 0.00053

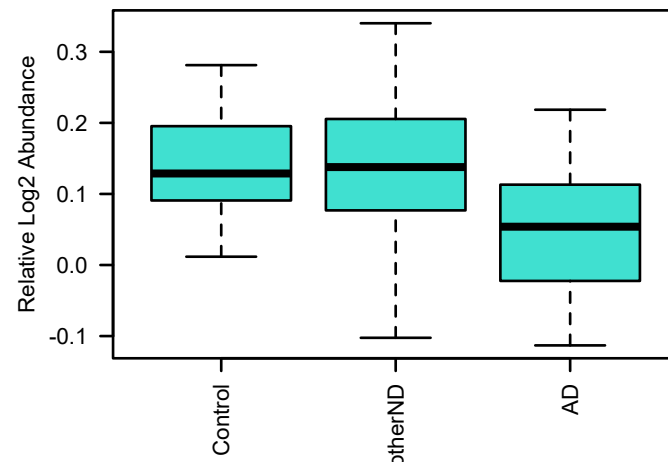

**bicor=-0.27, p=0.013**  
**cor=-0.31, p=0.0041**

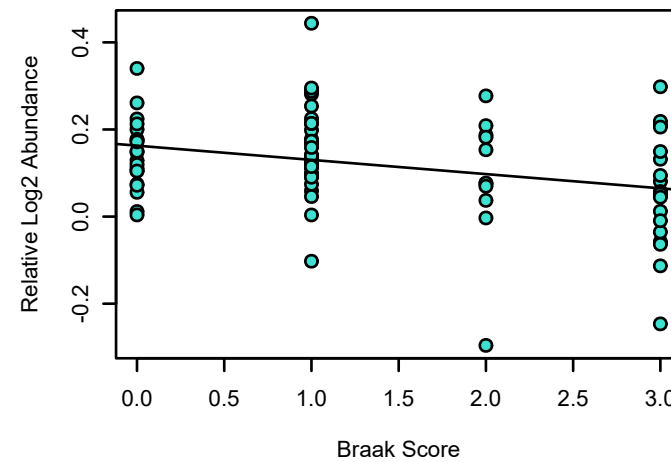

**bicor=-0.25, p=0.013**  
**cor=-0.27, p=0.0066**

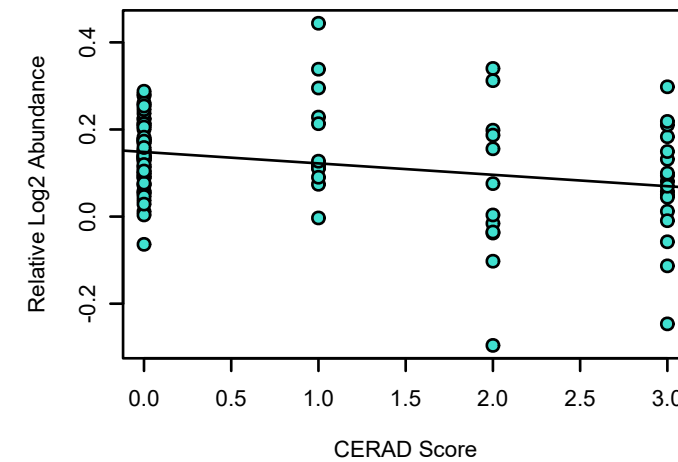

**GNAT3 UPenn Mixed PRM**  
NA grey20 MEGA module member  
K-W ANOVA p: 0.00099

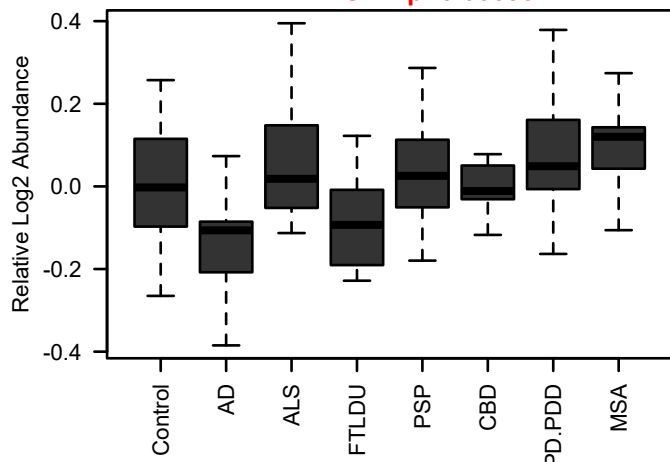

**GNAT3 UPenn Mixed PRM**  
K-W ANOVA p: 0.00047

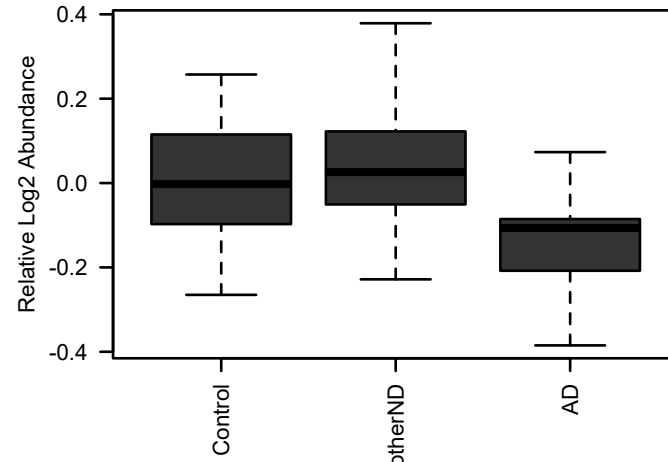

**bicor=-0.25, p=0.024**  
**cor=-0.28, p=0.0099**

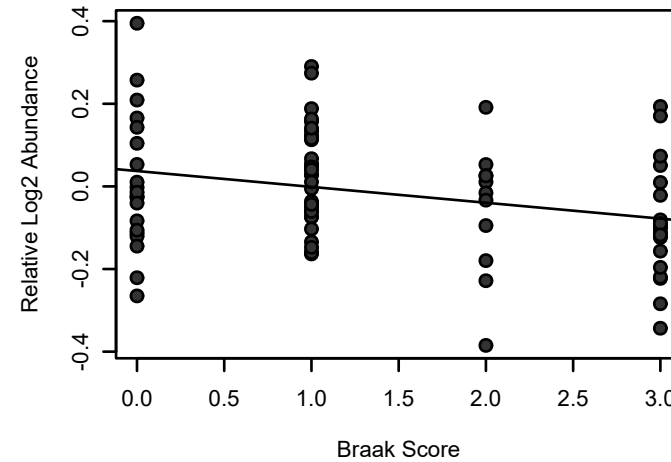

**bicor=-0.22, p=0.03**  
**cor=-0.22, p=0.028**

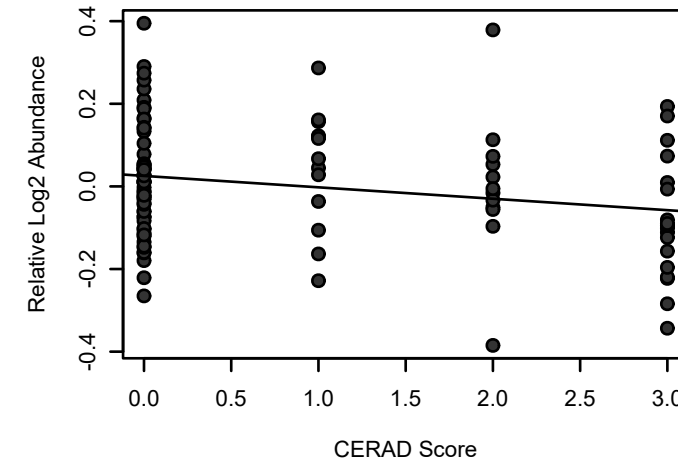

**GNAI1 UPenn Mixed PRM**  
M1 turquoise MEGA module member  
K-W ANOVA p: 1.2e-07

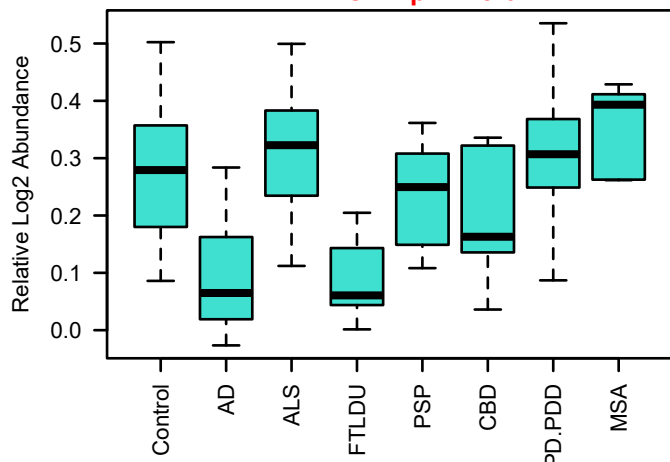

**GNAI1 UPenn Mixed PRM**  
K-W ANOVA p: 1.9e-06

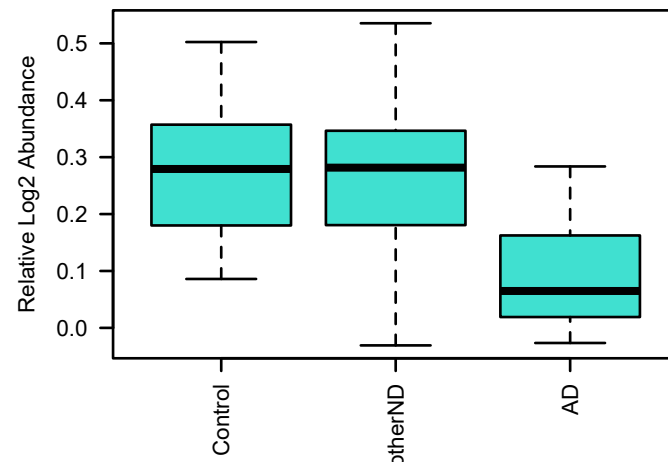

**bicor=-0.35, p=0.0013**  
**cor=-0.35, p=0.0011**

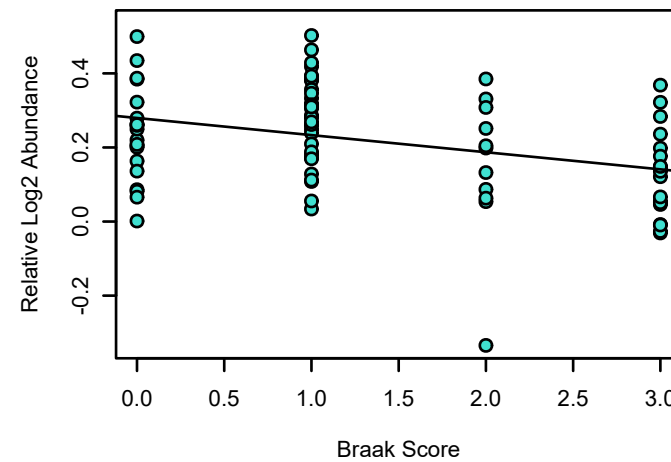

**bicor=-0.29, p=0.0032**  
**cor=-0.3, p=0.0024**

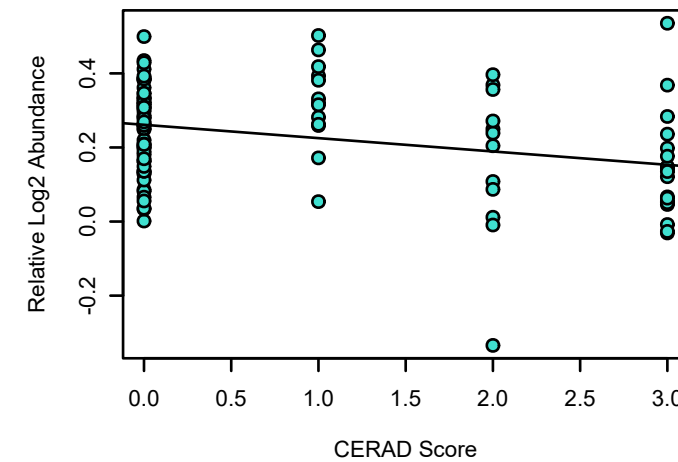

**SIRPA UPenn Mixed PRM**  
M1 turquoise MEGA module member  
K-W ANOVA p: 0.0011

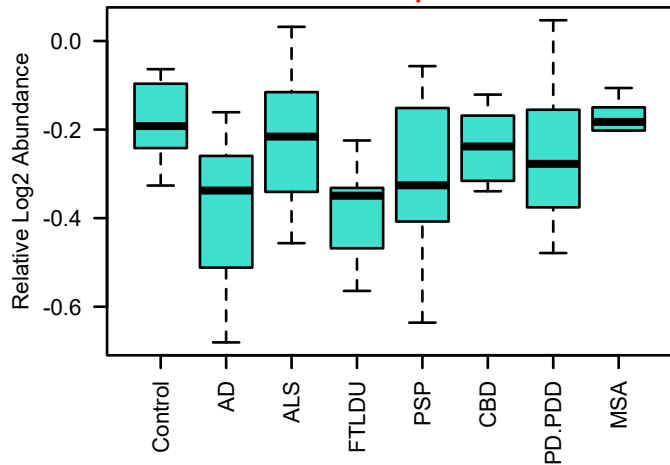

**SIRPA UPenn Mixed PRM**  
K-W ANOVA p: 0.0013

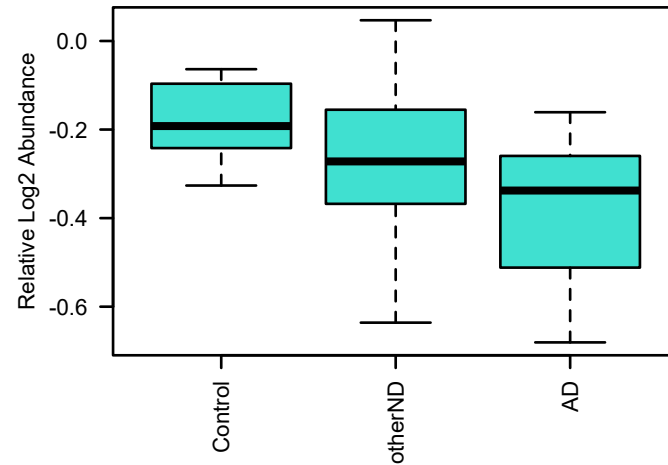

**bicor=-0.34, p=0.0014**  
**cor=-0.34, p=0.0016**

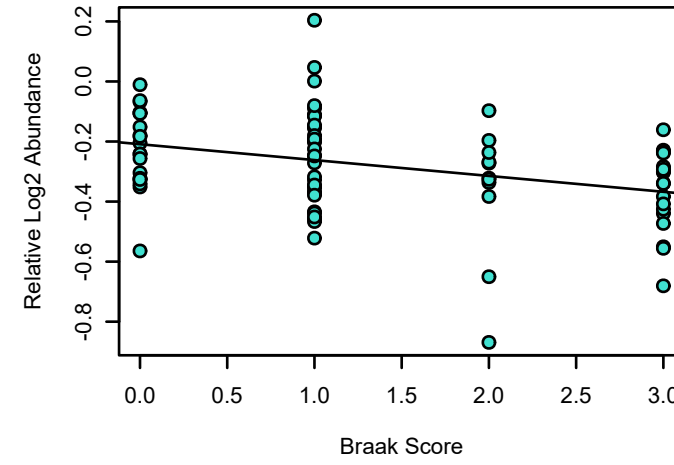

**bicor=-0.28, p=0.0054**  
**cor=-0.28, p=0.0048**

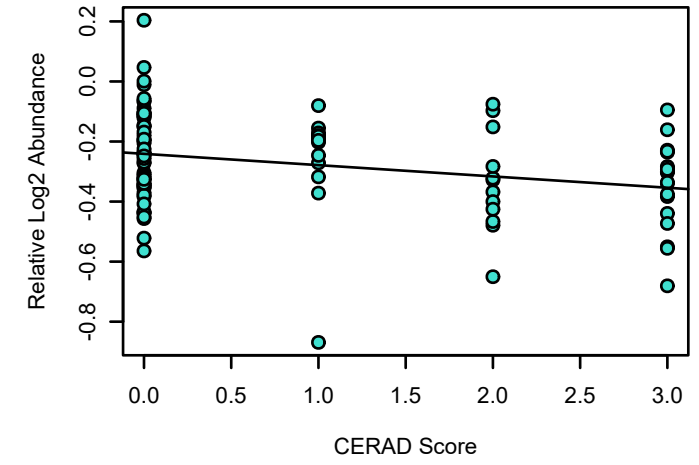

**DLG4 UPenn Mixed PRM**  
M1 turquoise MEGA module member  
K-W ANOVA p: 3.5e-07

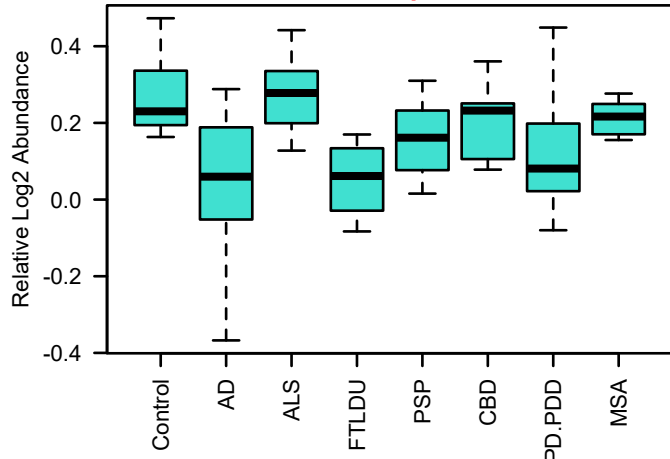

**DLG4 UPenn Mixed PRM**  
K-W ANOVA p: 7e-05

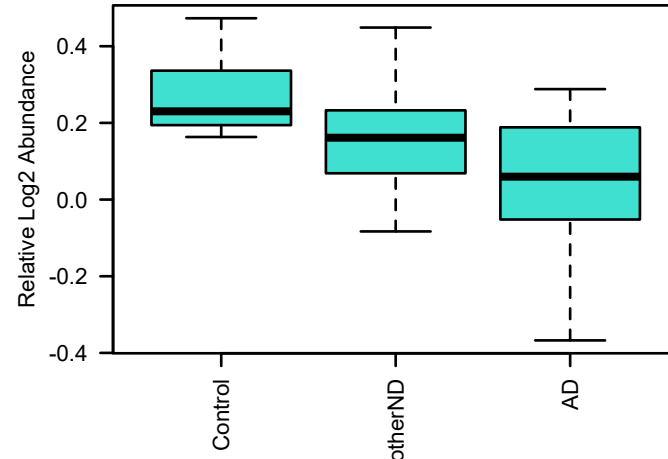

**bicor=-0.35, p=0.0011**  
**cor=-0.37, p=0.00053**

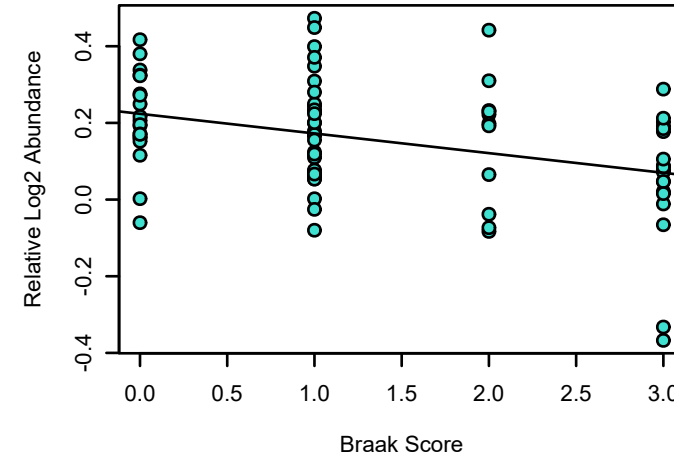

**bicor=-0.32, p=0.00099**  
**cor=-0.36, p=0.00023**

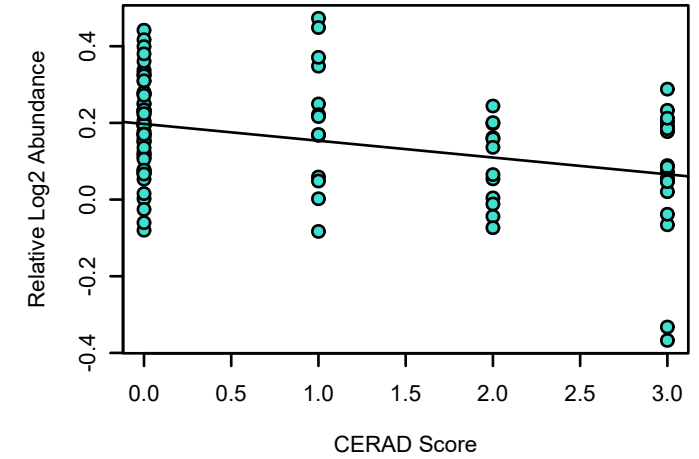

**ABAT UPenn Mixed PRM**  
M3 brown MEGA module member  
K-W ANOVA p: 0.0094

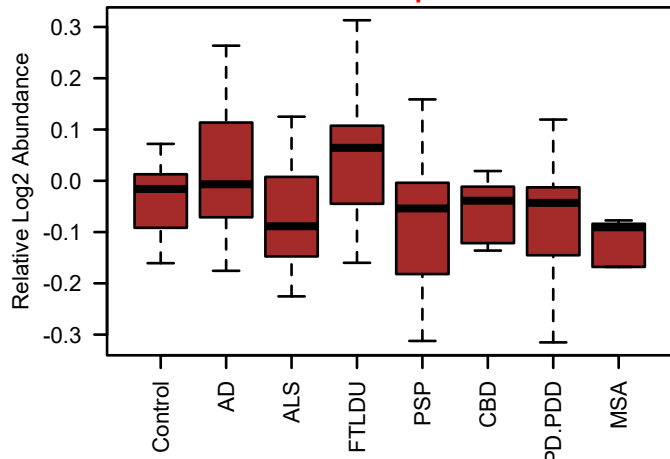

**ABAT UPenn Mixed PRM**  
K-W ANOVA p: 0.01

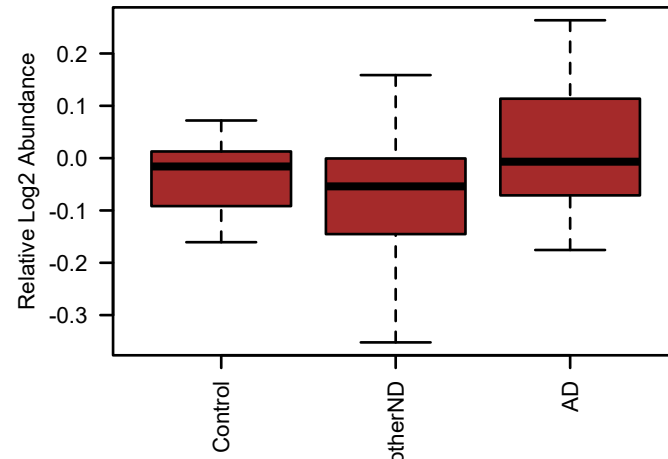

**bicor=-0.051, p=0.64**  
**cor=0.077, p=0.49**

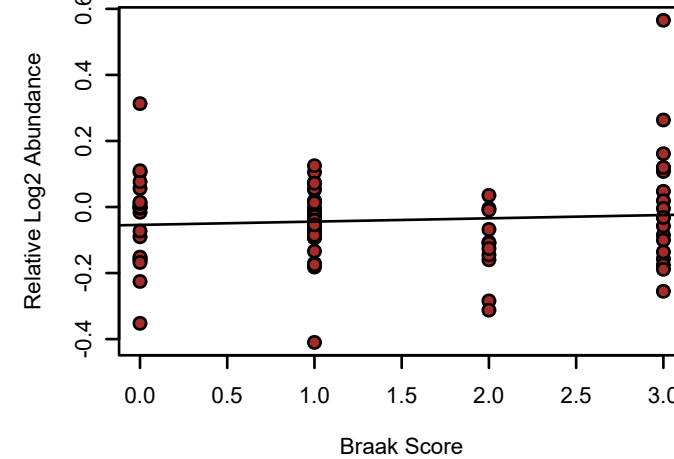

**bicor=0.056, p=0.58**  
**cor=0.14, p=0.16**

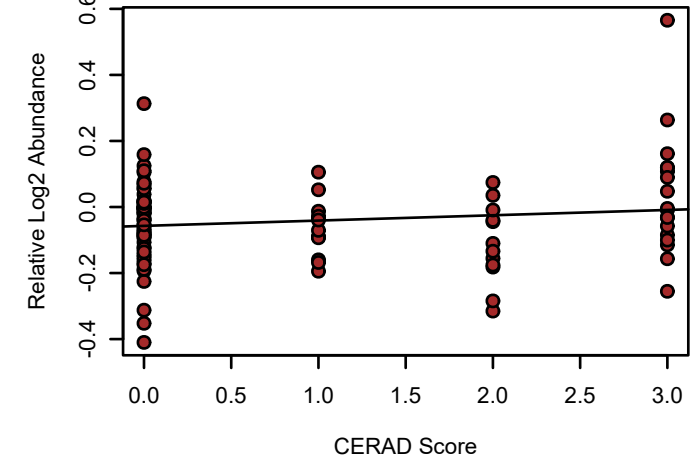

**HPCA UPenn Mixed PRM**  
M1 turquoise MEGA module member  
K-W ANOVA p: 0.009

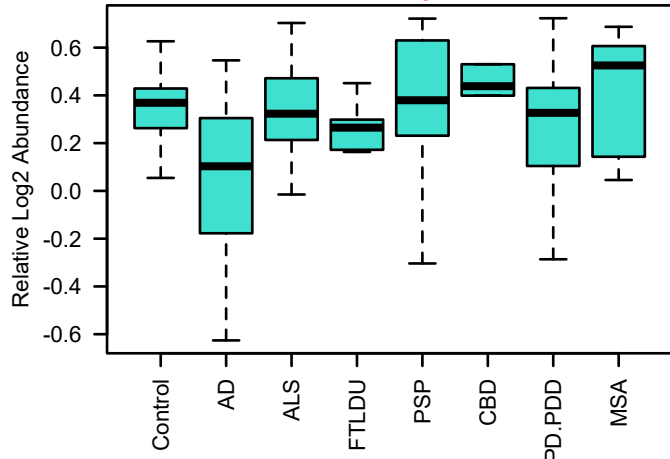

**HPCA UPenn Mixed PRM**  
K-W ANOVA p: 0.00038

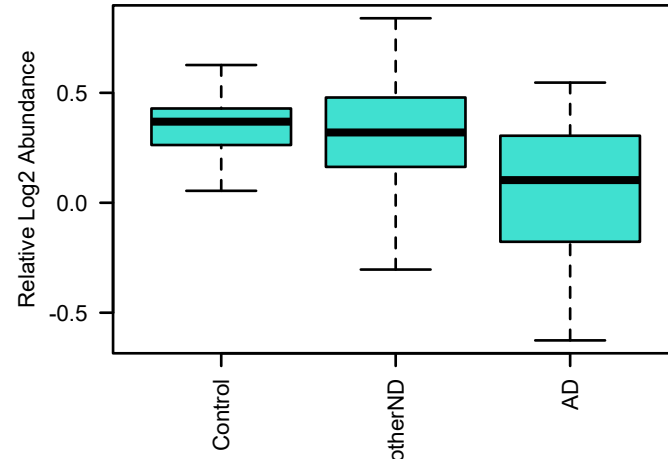

**bicor=-0.27, p=0.011**  
**cor=-0.33, p=0.0022**

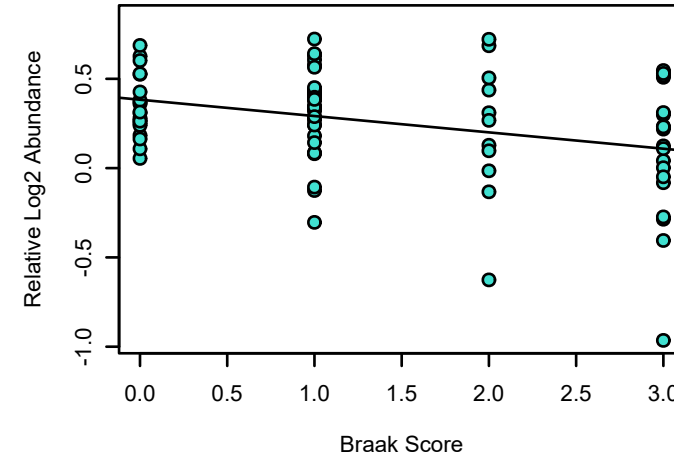

**bicor=-0.28, p=0.0046**  
**cor=-0.35, p=0.00036**

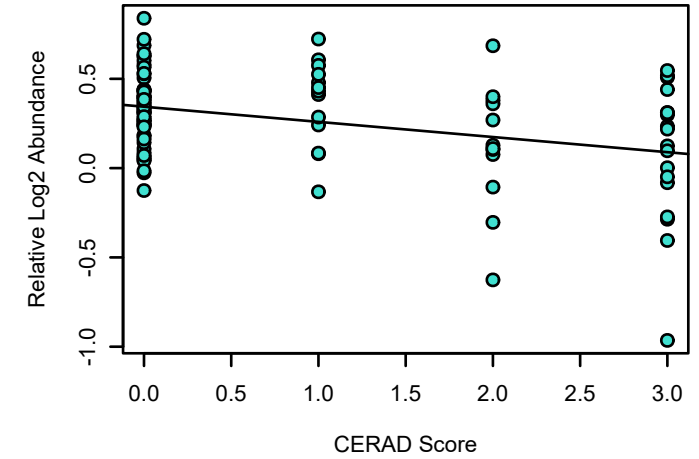



**CLTC UPenn Mixed PRM**  
**M1 turquoise MEGA module member**  
**K-W ANOVA p: 0.00091**

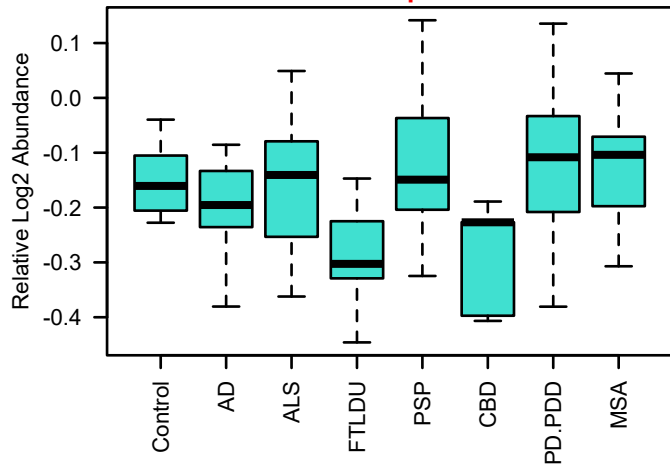

**CLTC UPenn Mixed PRM**  
**K-W ANOVA p: 0.32**

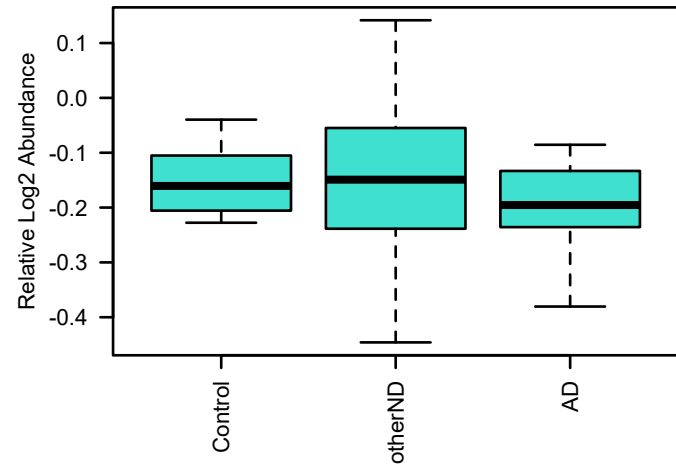

**bicor=-0.14, p=0.2**  
**cor=-0.13, p=0.24**

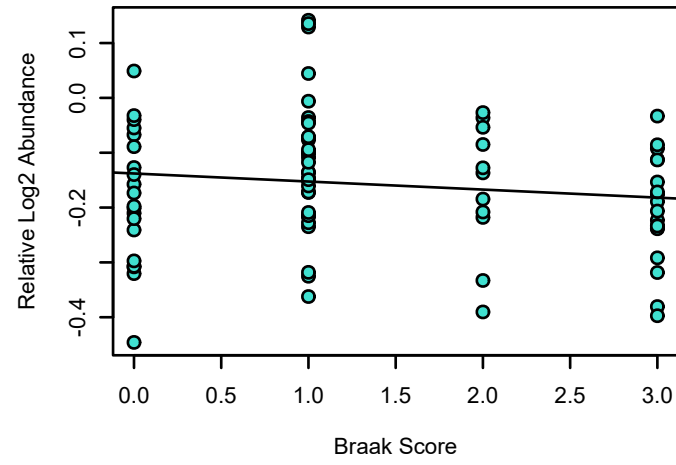

**bicor=-0.088, p=0.39**  
**cor=-0.08, p=0.43**

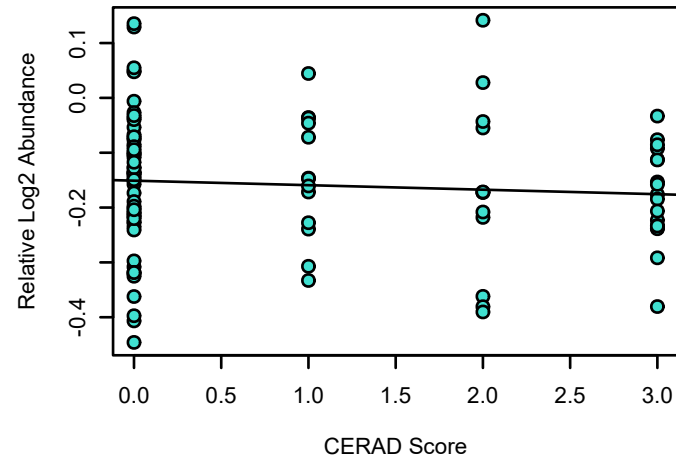

**HNRNPU UPenn Mixed PRM**  
**M10 purple MEGA module member**  
**K-W ANOVA p: 0.00047**

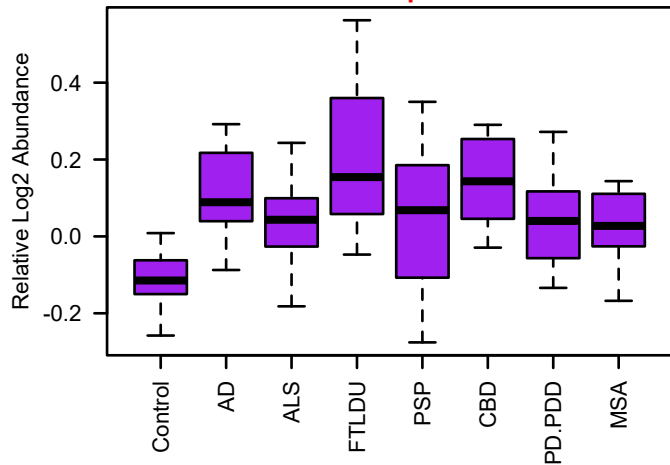

**HNRNPU UPenn Mixed PRM**  
**K-W ANOVA p: 0.00099**

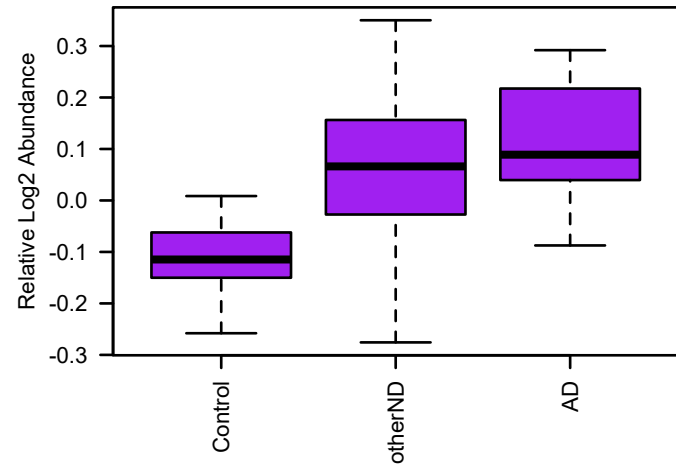

**bicor=0.3, p=0.005**  
**cor=0.3, p=0.0056**

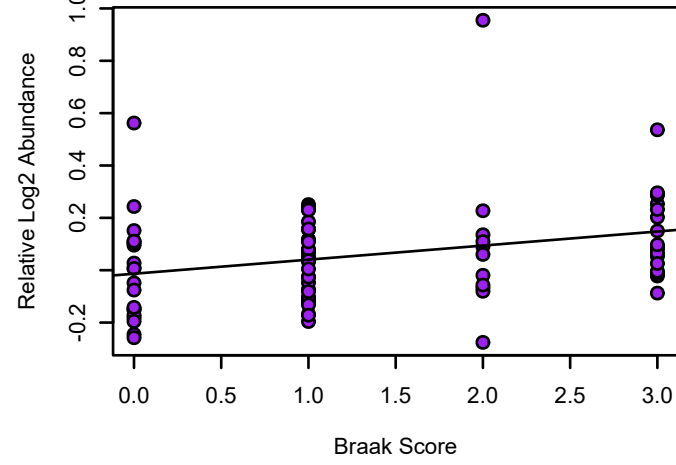

**bicor=0.14, p=0.16**  
**cor=0.13, p=0.2**

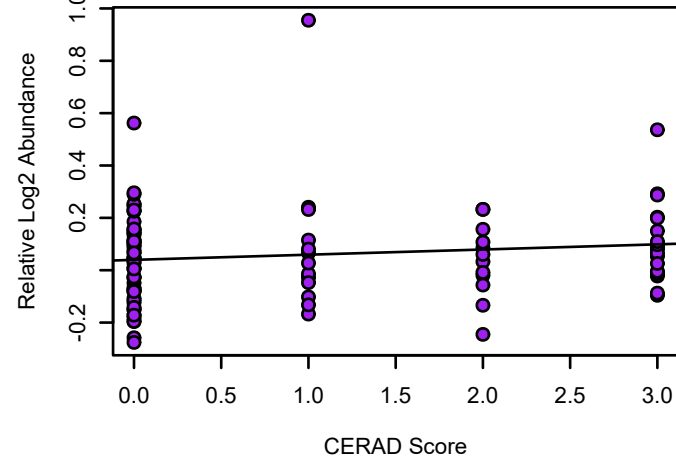

**SPTBN1 UPenn Mixed PRM**  
**NA grey MEGA module member**  
**K-W ANOVA p: 0.24**

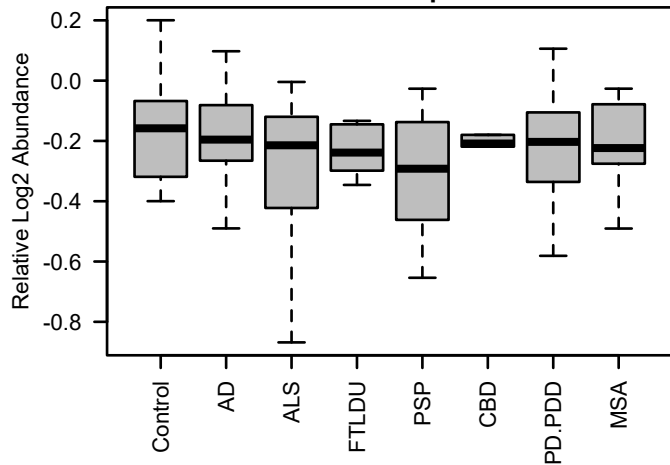

**SPTBN1 UPenn Mixed PRM**  
**K-W ANOVA p: 0.11**

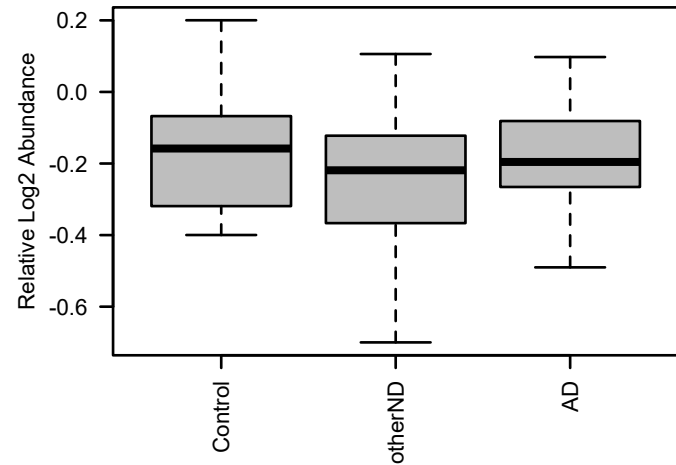

**bicor=0.015, p=0.89**  
**cor=0.056, p=0.61**

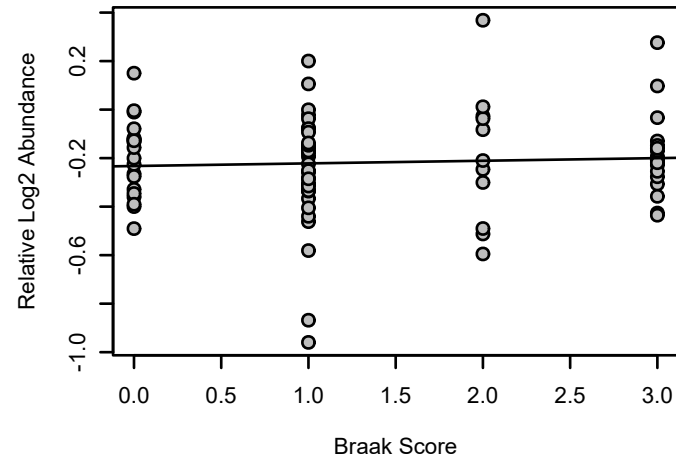

**bicor=0.14, p=0.16**  
**cor=0.13, p=0.2**

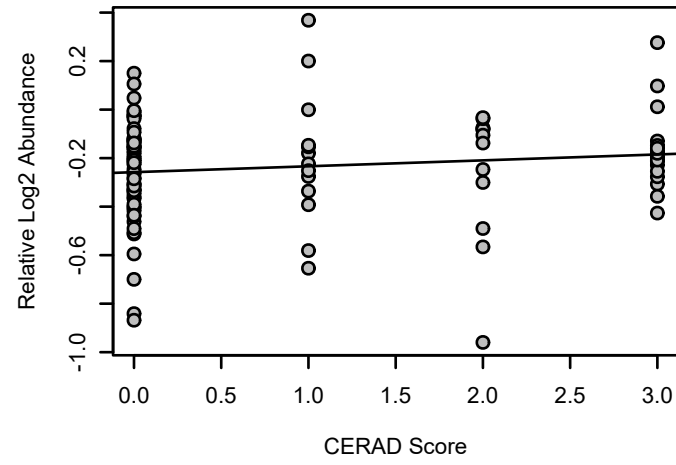

**ANK2 UPenn Mixed PRM**  
**M6 red MEGA module member**  
**K-W ANOVA p: 0.00036**

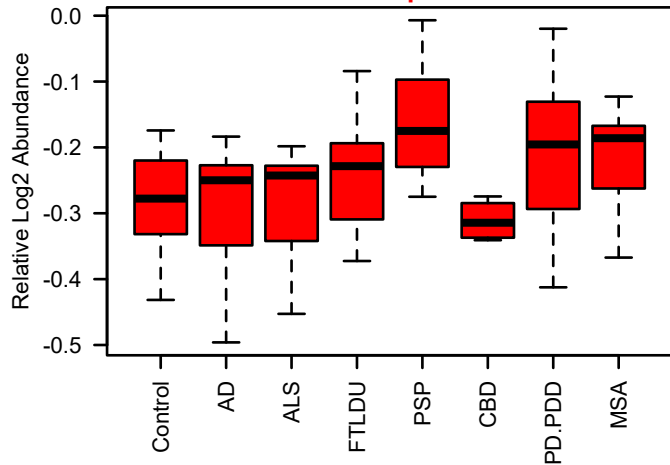

**ANK2 UPenn Mixed PRM**  
**K-W ANOVA p: 0.013**

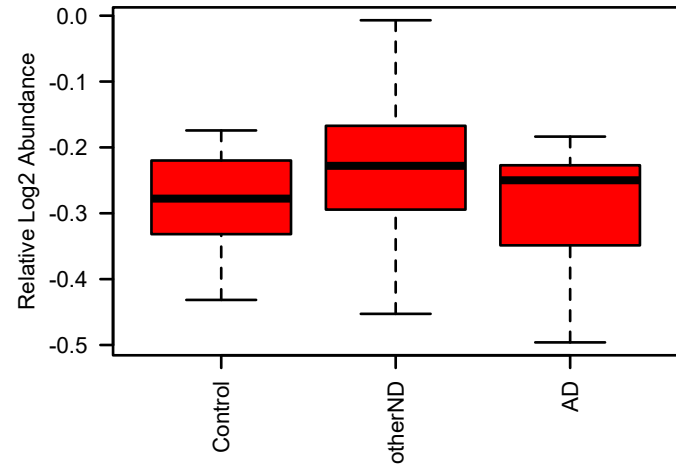

**bicor=-0.16, p=0.16**  
**cor=-0.14, p=0.2**

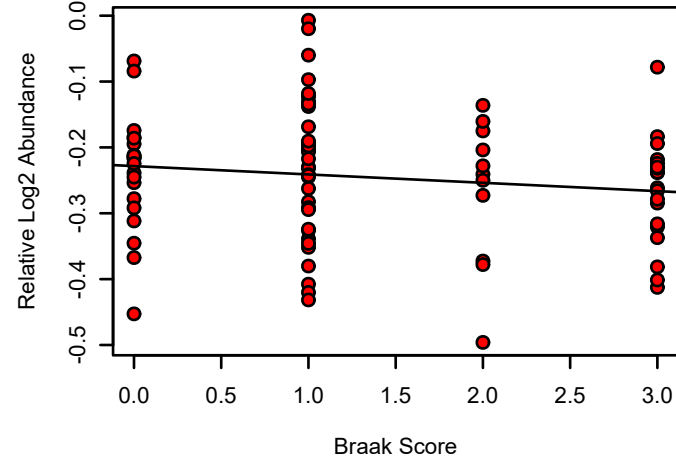

**bicor=0.018, p=0.86**  
**cor=0.0088, p=0.93**

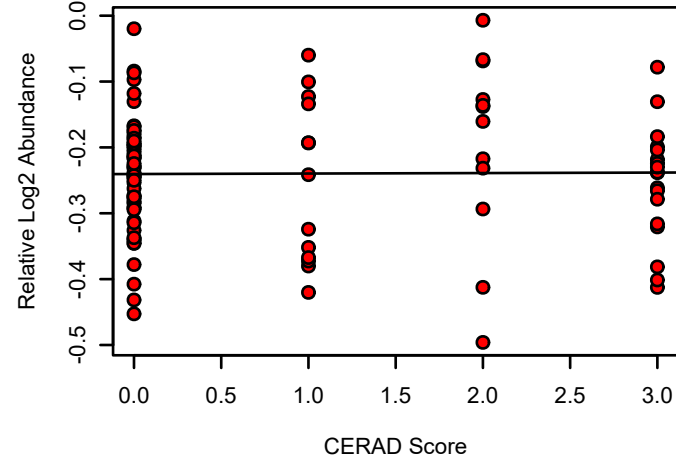

**ATP2B2 UPenn Mixed PRM**  
M3 brown MEGA module member  
K-W ANOVA p: 0.0013

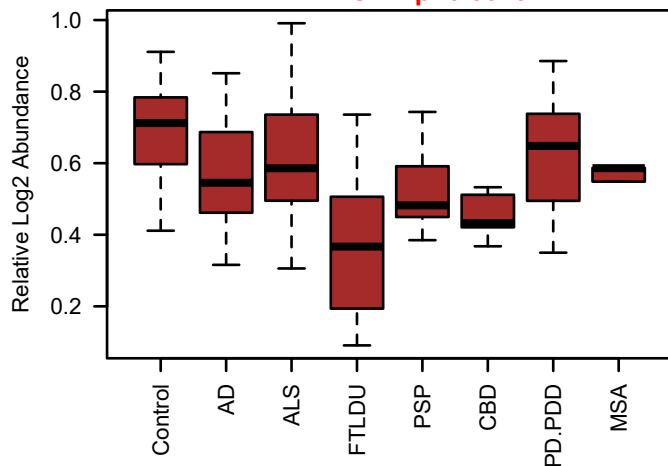

**ATP2B2 UPenn Mixed PRM**  
K-W ANOVA p: 0.023

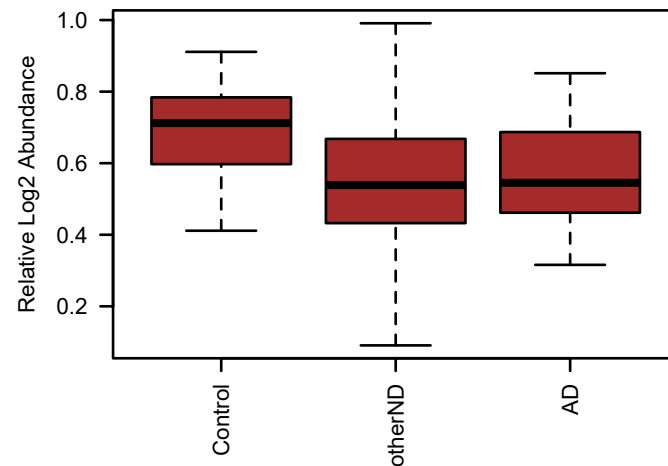

**bicor=-0.14, p=0.22**  
**cor=-0.13, p=0.24**

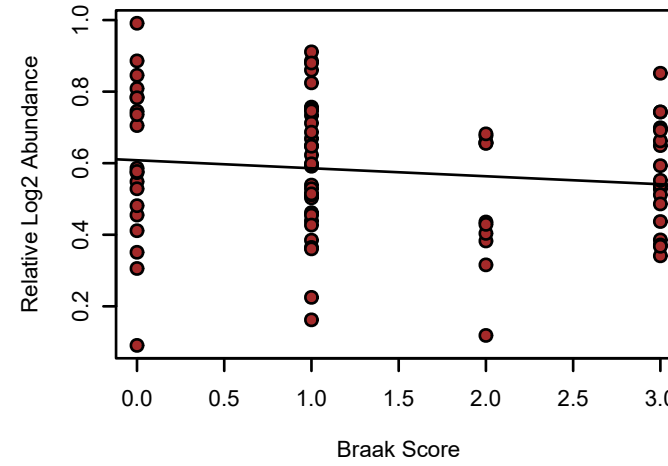

**bicor=-0.065, p=0.52**  
**cor=-0.057, p=0.57**

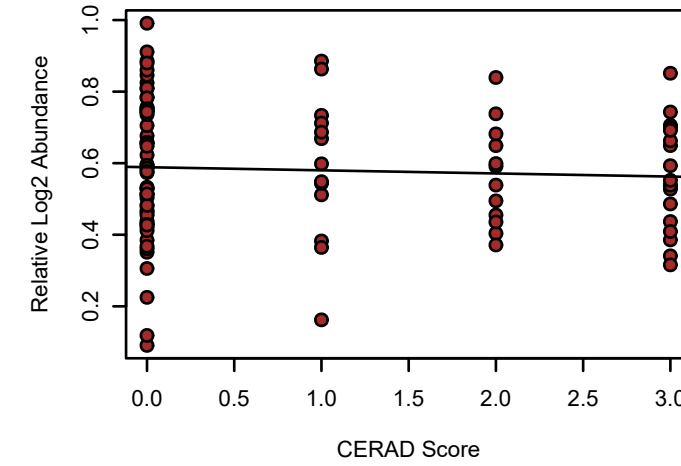

**FKBP4 UPenn Mixed PRM**  
M11 greenyellow MEGA module member  
K-W ANOVA p: 0.72

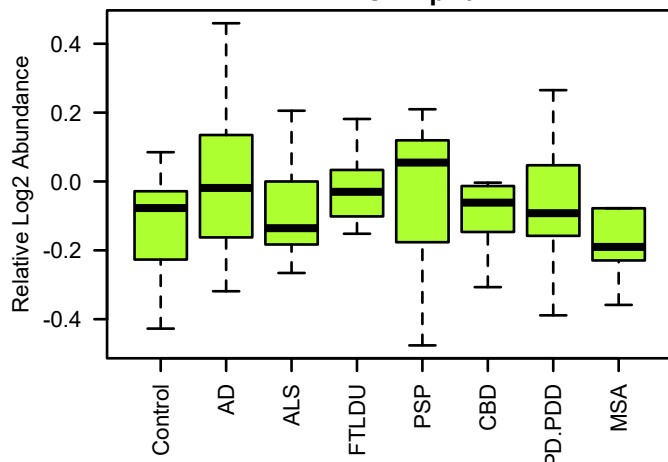

**FKBP4 UPenn Mixed PRM**  
K-W ANOVA p: 0.18

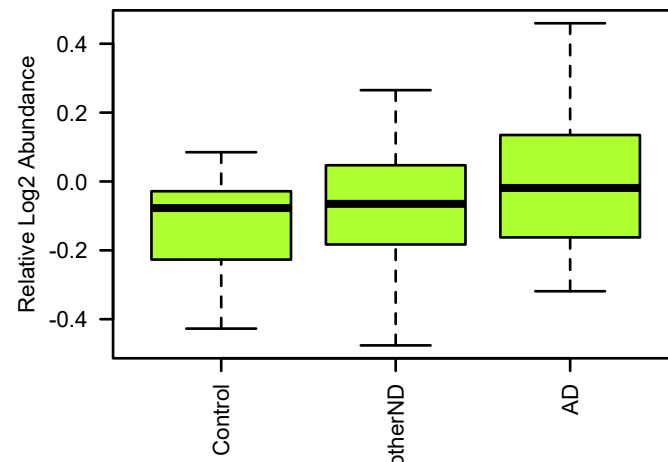

**bicor=0.17, p=0.12**  
**cor=0.2, p=0.068**

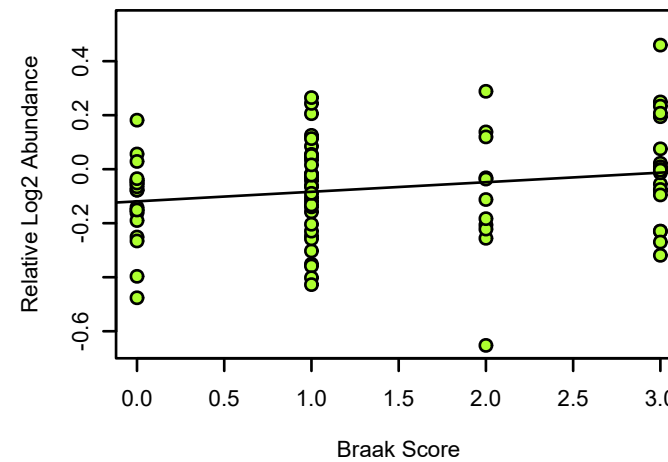

**bicor=0.014, p=0.89**  
**cor=0.017, p=0.87**

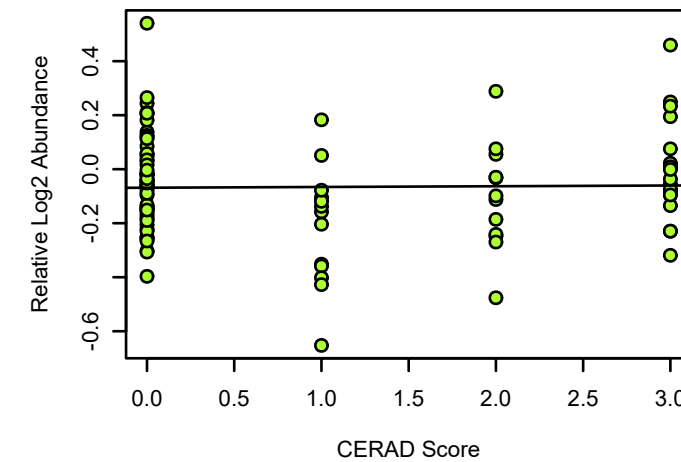

**SLC25A11 UPenn Mixed PRM**  
M3 brown MEGA module member  
K-W ANOVA p: 0.38

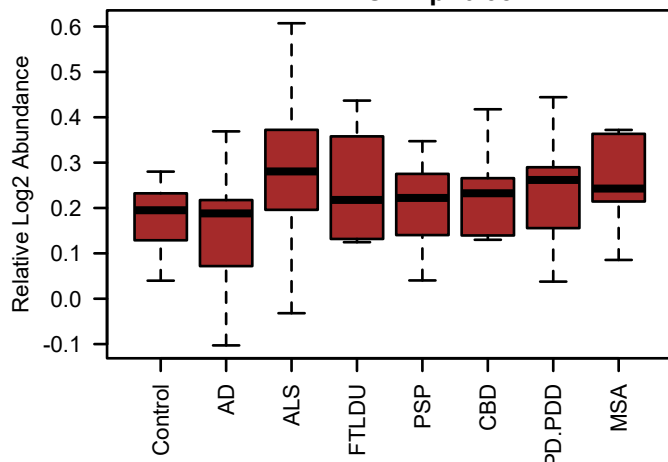

**SLC25A11 UPenn Mixed PRM**  
K-W ANOVA p: 0.075

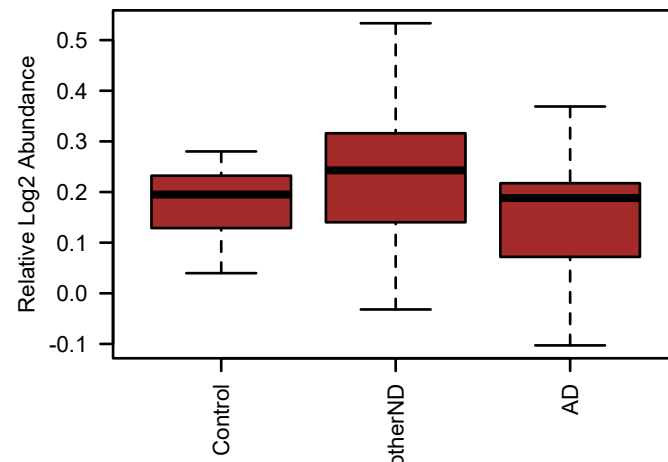

**bicor=-0.21, p=0.061**  
**cor=-0.18, p=0.1**

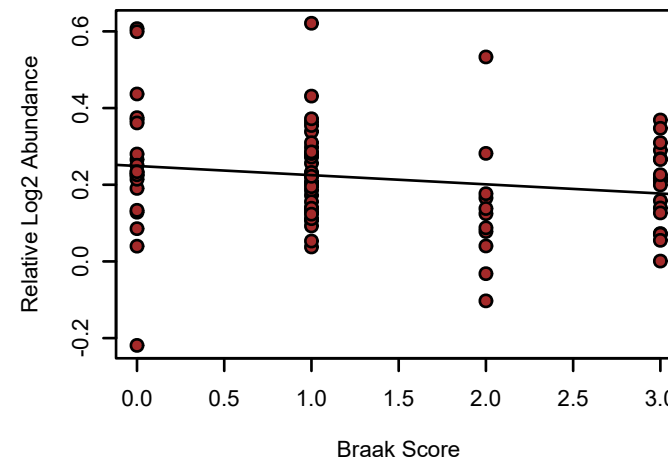

**bicor=-0.19, p=0.052**  
**cor=-0.19, p=0.058**

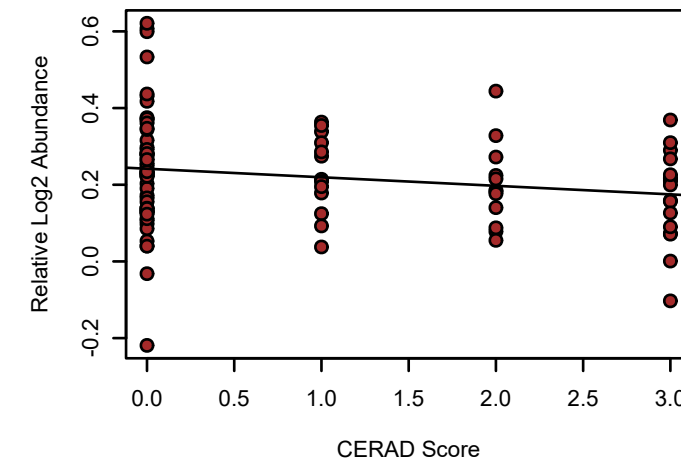

**LMNB2 UPenn Mixed PRM**  
M10 purple MEGA module member  
K-W ANOVA p: 1.1e-07

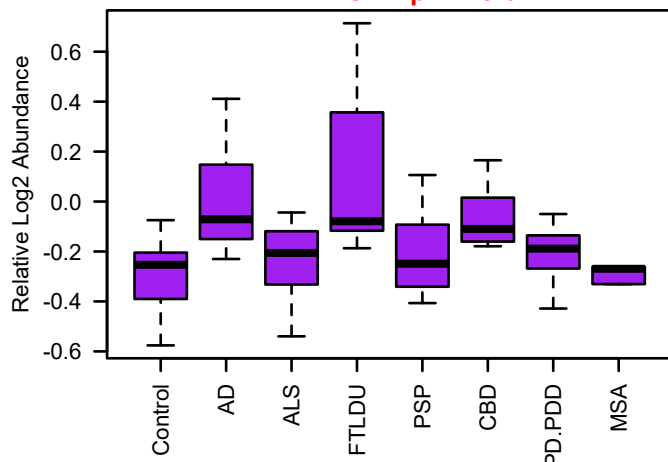

**LMNB2 UPenn Mixed PRM**  
K-W ANOVA p: 1e-04

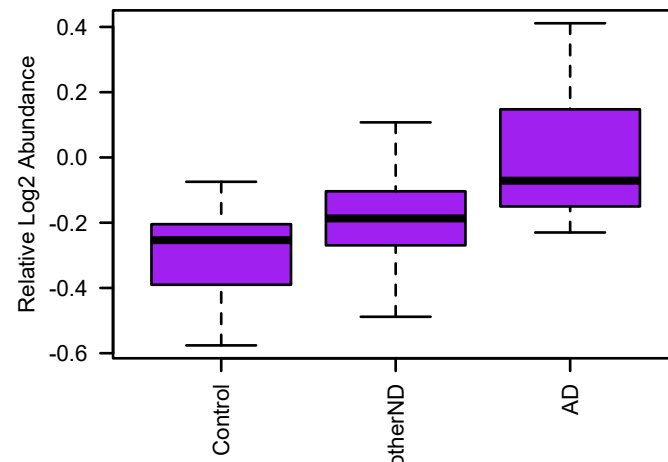

**bicor=0.4, p=0.00019**  
**cor=0.35, p=0.0011**

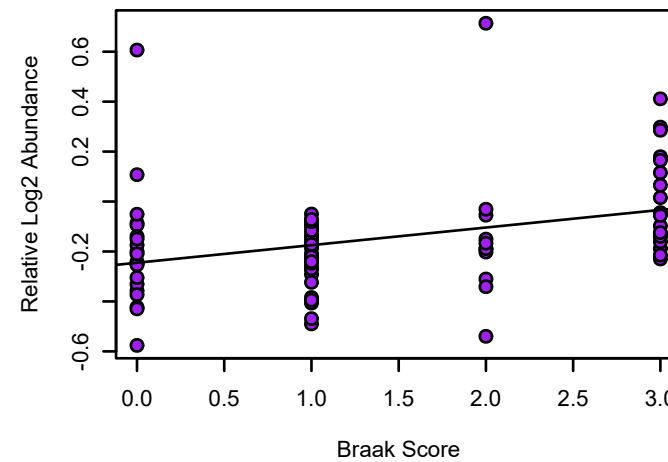

**bicor=0.24, p=0.018**  
**cor=0.22, p=0.028**

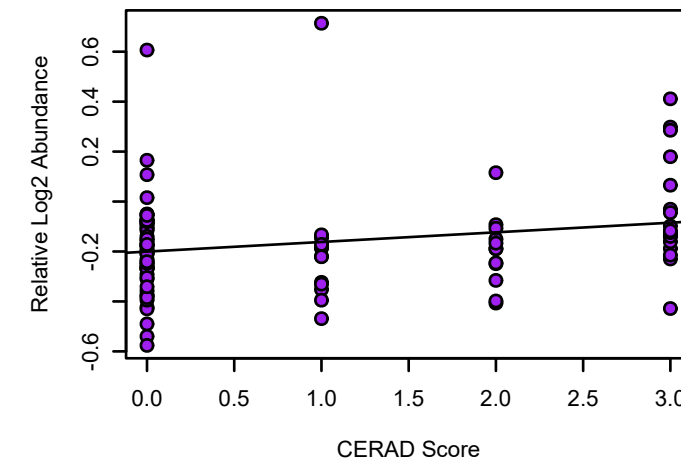

**PRDX4 UPenn Mixed PRM**  
NA grey MEGA module member  
K-W ANOVA p: 3.8e-07

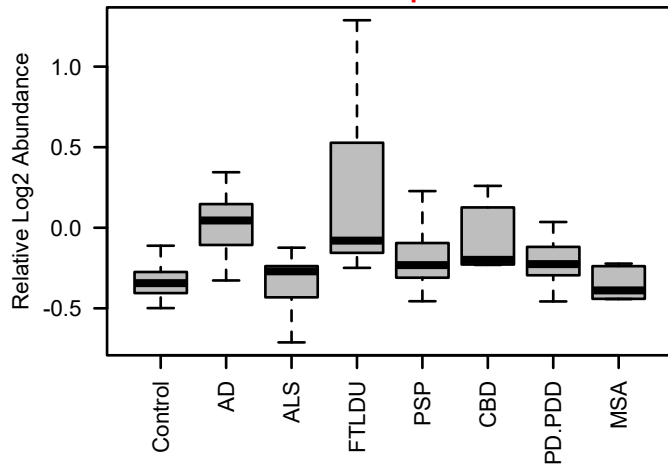

**PRDX4 UPenn Mixed PRM**  
K-W ANOVA p: 0.00012

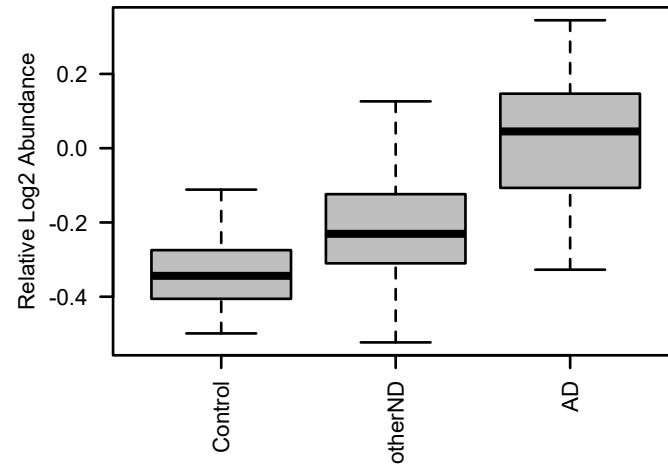

**bicor=0.53, p=2.7e-07**  
**cor=0.4, p=0.00016**

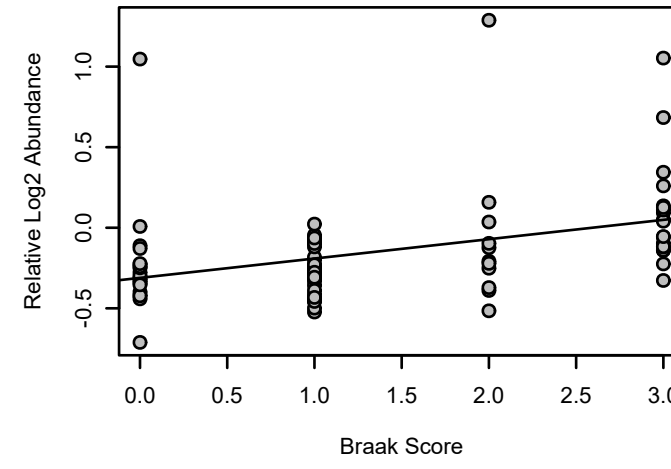

**bicor=0.39, p=6.3e-05**  
**cor=0.32, p=0.0012**

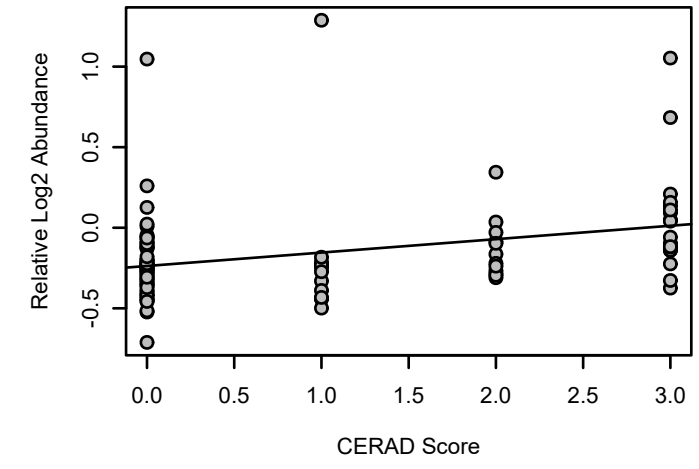

**PRDX1 UPenn Mixed PRM**  
M4 yellow MEGA module member  
K-W ANOVA p: 0.0012

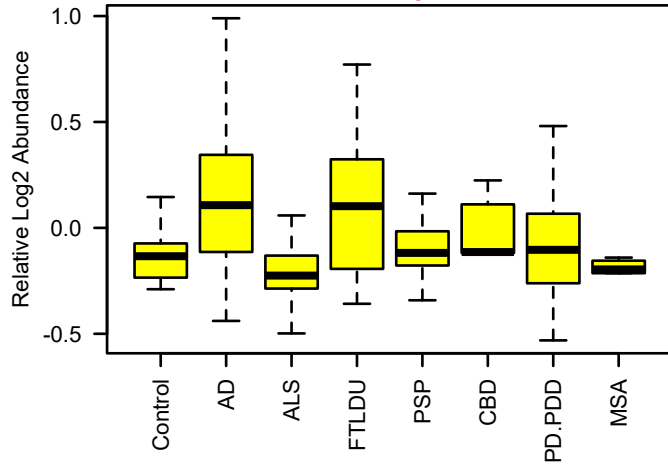

**PRDX1 UPenn Mixed PRM**  
K-W ANOVA p: 0.0012

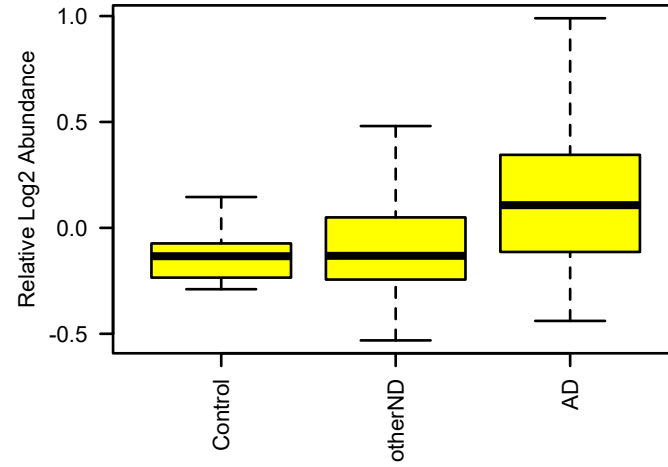

**bicor=0.31, p=0.0046**  
**cor=0.3, p=0.0056**

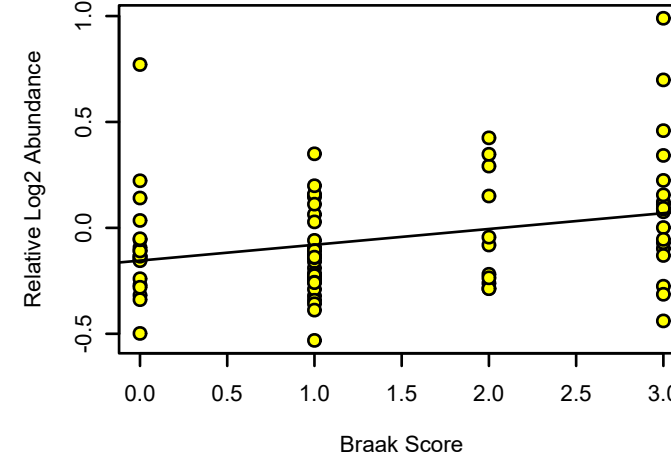

**bicor=0.22, p=0.026**  
**cor=0.27, p=0.0066**

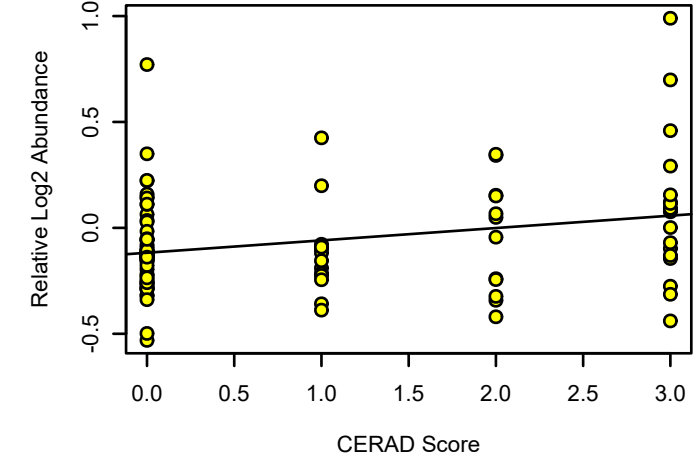

**SRSF1 UPenn Mixed PRM**  
M10 purple MEGA module member  
K-W ANOVA p: 5.2e-07

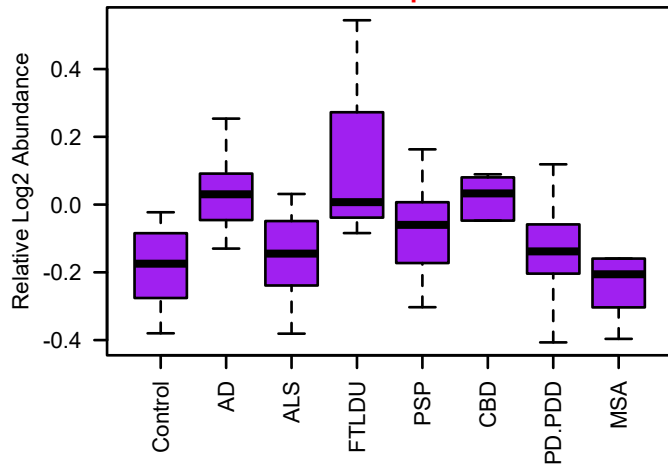

**SRSF1 UPenn Mixed PRM**  
K-W ANOVA p: 0.00017

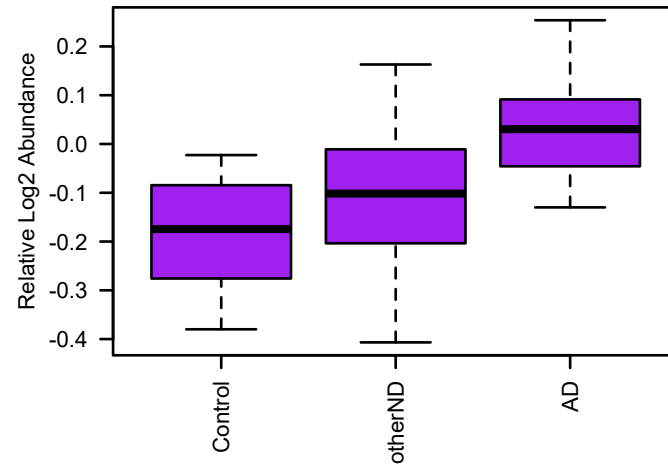

**bicor=0.36, p=0.00067**  
**cor=0.36, p=0.00077**

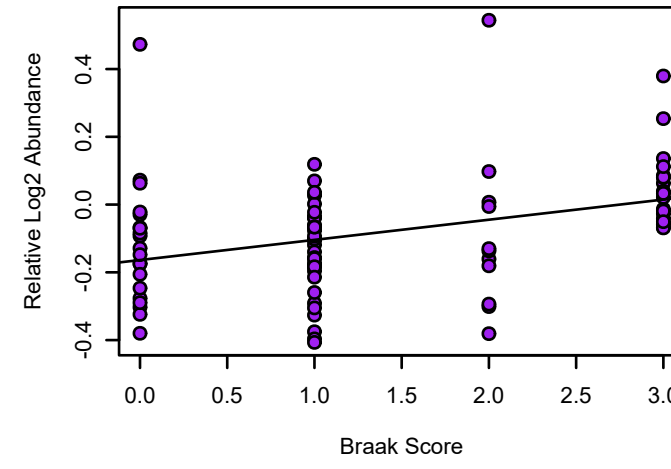

**bicor=0.28, p=0.0055**  
**cor=0.25, p=0.012**

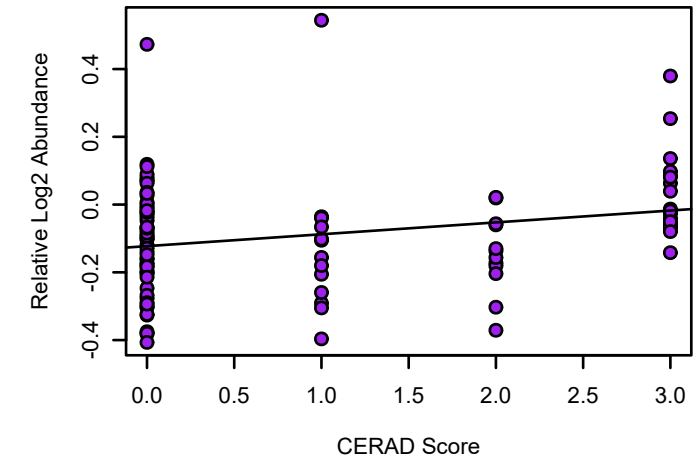

**ILF3 UPenn Mixed PRM**  
M10 purple MEGA module member  
K-W ANOVA p: 0.038

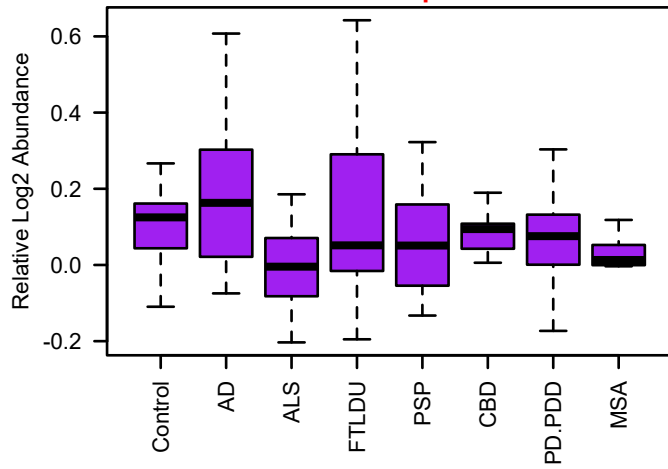

**ILF3 UPenn Mixed PRM**  
K-W ANOVA p: 0.018

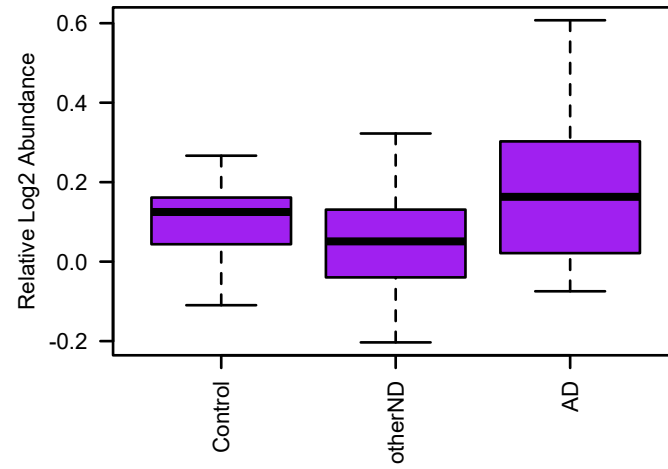

**bicor=0.2, p=0.066**  
**cor=0.23, p=0.035**

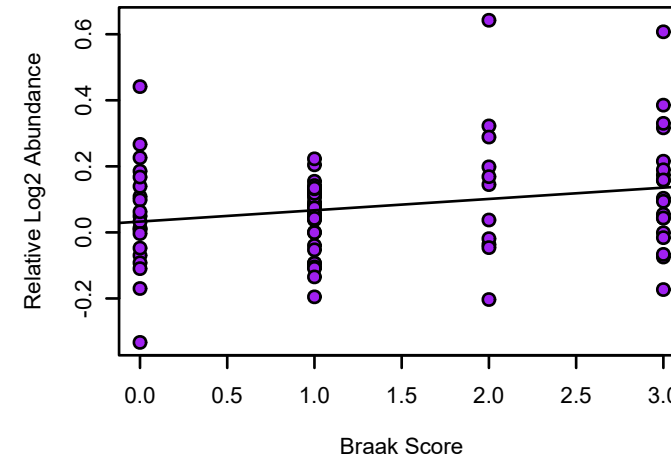

**bicor=0.13, p=0.2**  
**cor=0.16, p=0.11**

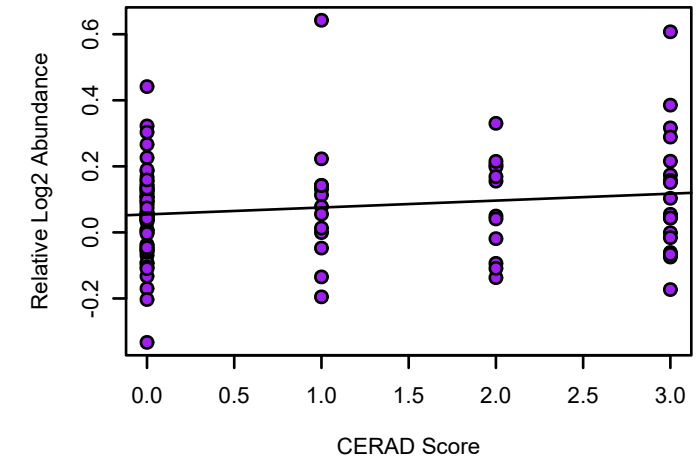

**PAK1 UPenn Mixed PRM**  
M1 turquoise MEGA module member  
K-W ANOVA p: 6.3e-06

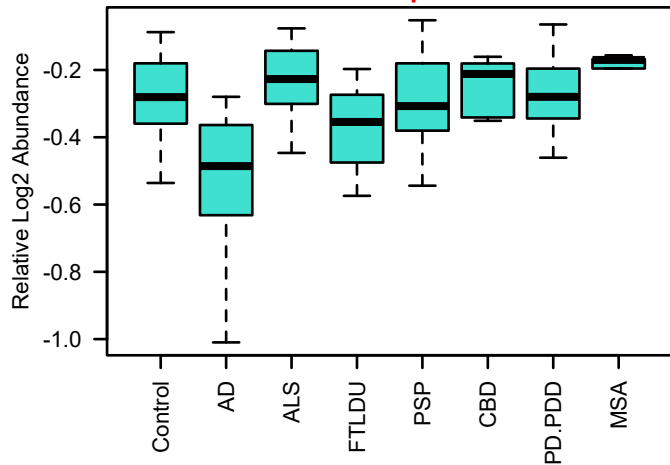

**PAK1 UPenn Mixed PRM**  
K-W ANOVA p: 1.4e-06

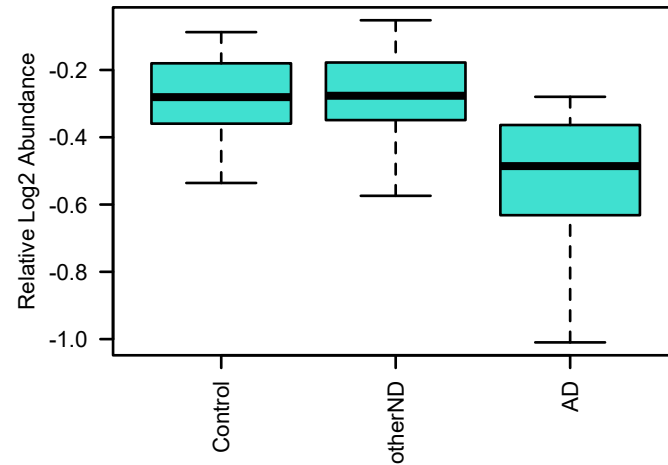

**bicor=-0.37, p=0.00056**  
**cor=-0.44, p=2.8e-05**

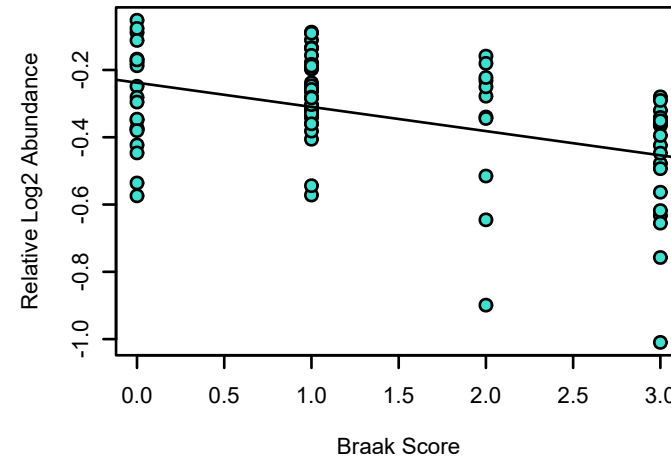

**bicor=-0.42, p=1.5e-05**  
**cor=-0.44, p=4.6e-06**

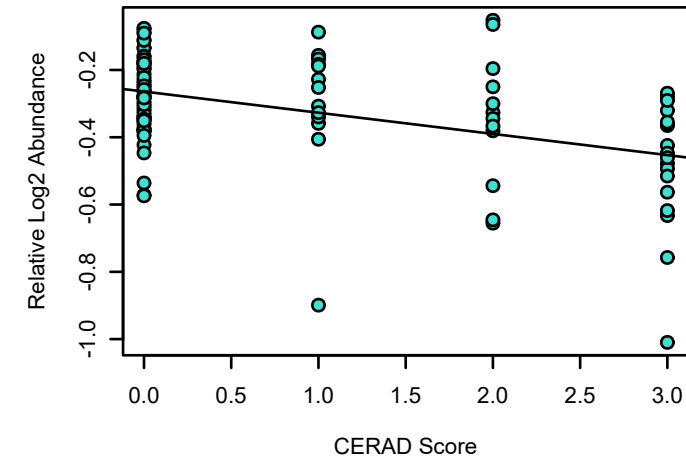

**AP3B2 UPenn Mixed PRM**  
M1 turquoise MEGA module member  
K-W ANOVA p: 1.5e-07

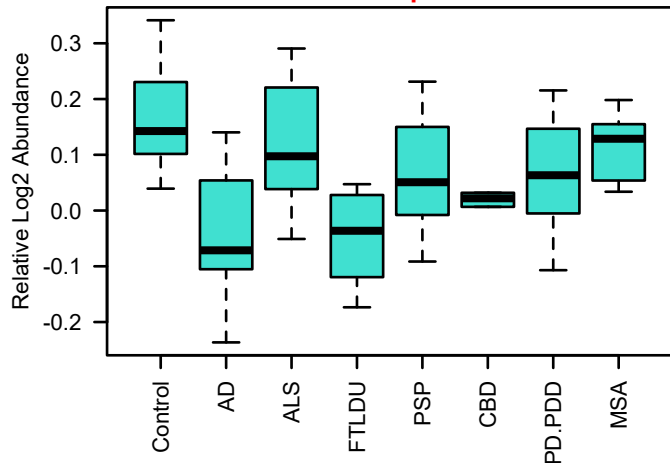

**AP3B2 UPenn Mixed PRM**  
K-W ANOVA p: 2.8e-07

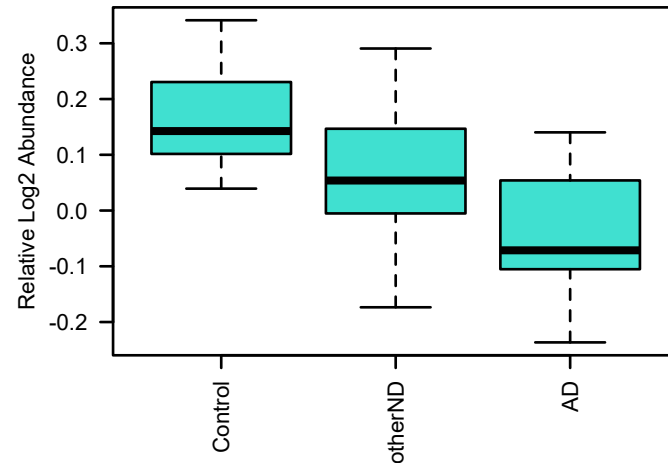

**bicor=-0.31, p=0.0047**  
**cor=-0.35, p=0.0011**

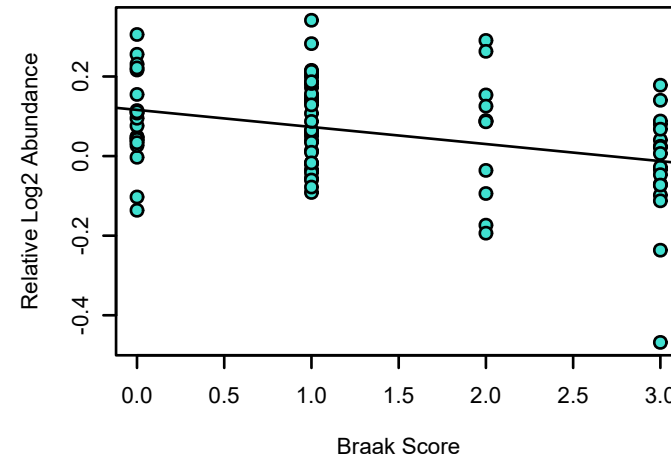

**bicor=-0.29, p=0.0032**  
**cor=-0.34, p=0.00054**

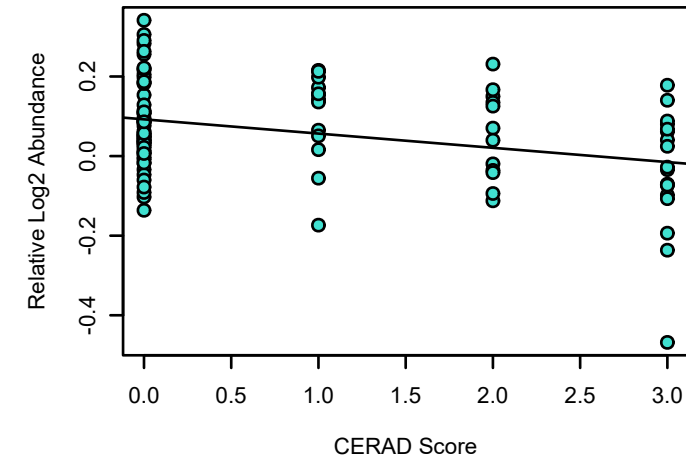

**NNT UPenn Mixed PRM**  
M3 brown MEGA module member  
K-W ANOVA p: 0.00079

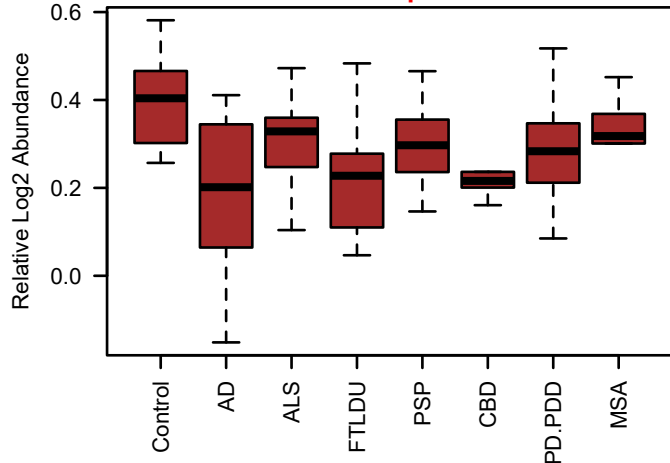

**NNT UPenn Mixed PRM**  
K-W ANOVA p: 0.00018

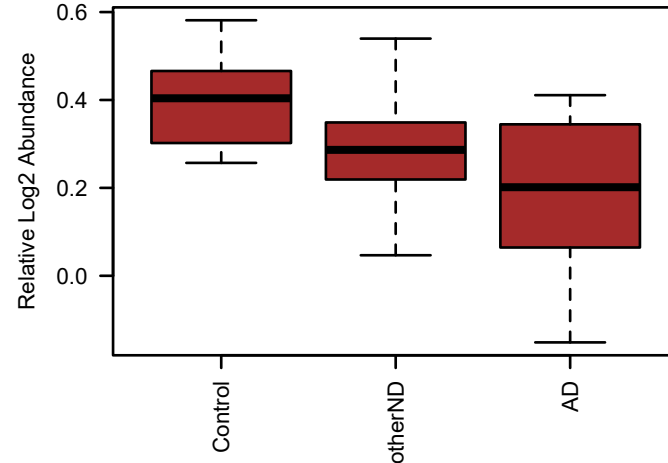

**bicor=-0.34, p=0.0017**  
**cor=-0.32, p=0.003**

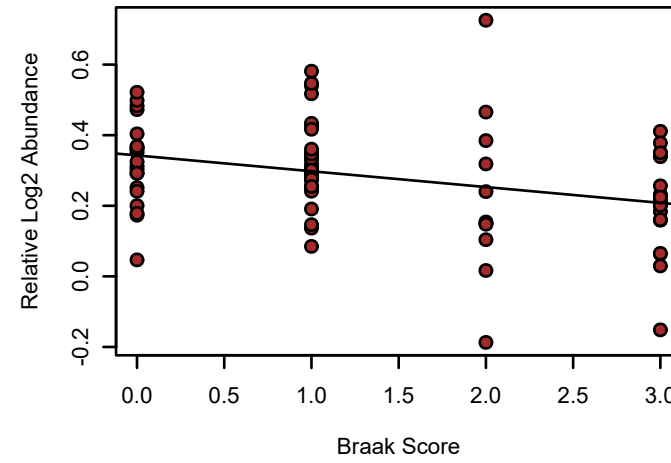

**bicor=-0.18, p=0.074**  
**cor=-0.2, p=0.046**

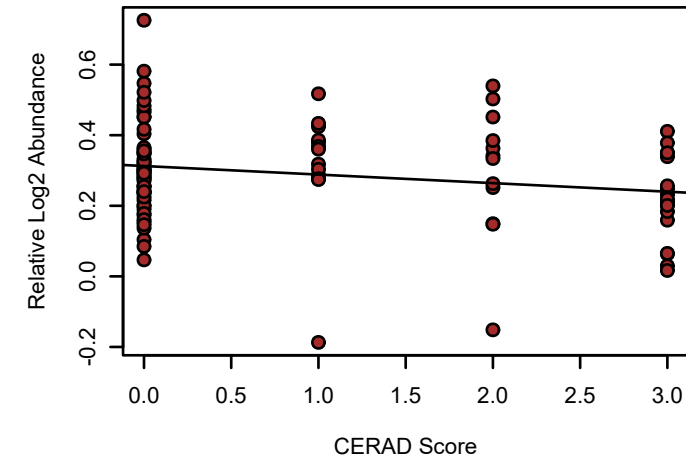

**TUBB3 UPenn Mixed PRM**  
NA grey MEGA module member  
K-W ANOVA p: 2.9e-05

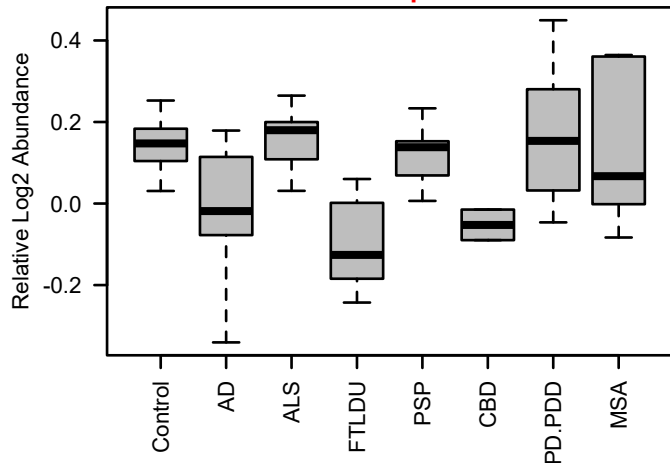

**TUBB3 UPenn Mixed PRM**  
K-W ANOVA p: 0.016

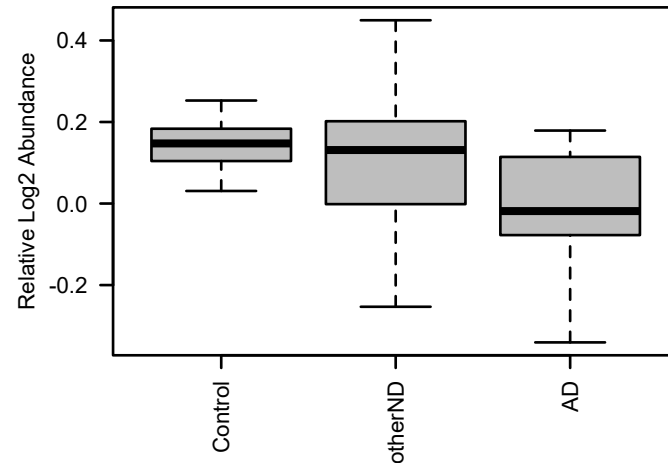

**bicor=-0.24, p=0.03**  
**cor=-0.2, p=0.068**

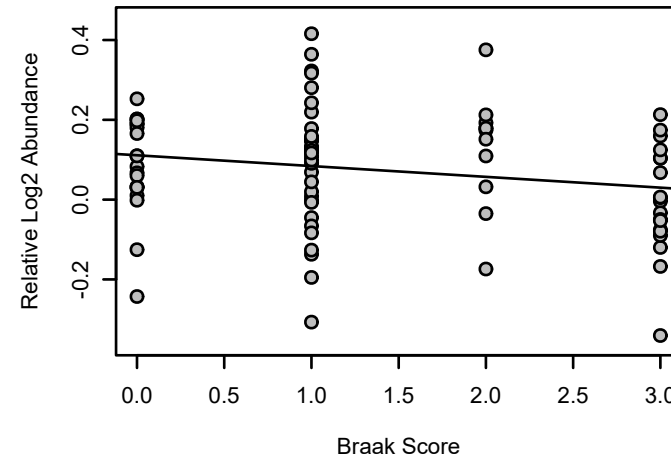

**bicor=-0.11, p=0.26**  
**cor=-0.13, p=0.2**

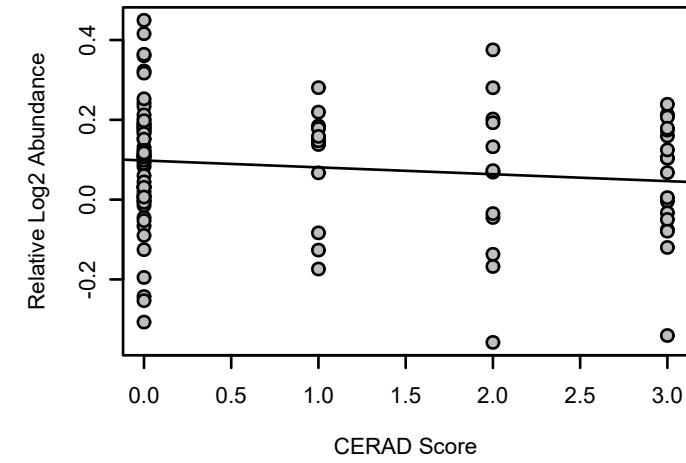

**CAMK2B UPenn Mixed PRM**  
**M1 turquoise MEGA module member**  
**K-W ANOVA p: 0.4**

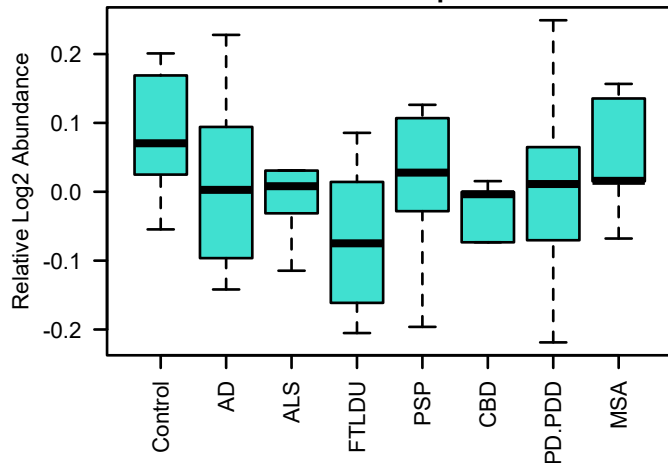

**CAMK2B UPenn Mixed PRM**  
**K-W ANOVA p: 0.18**

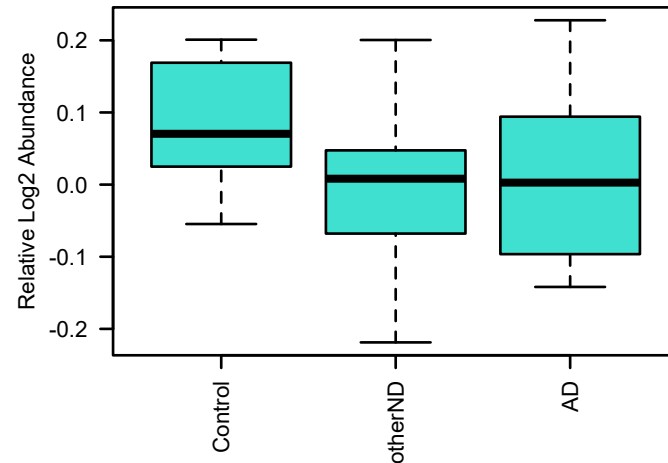

**bicor=-0.15, p=0.18**  
**cor=-0.14, p=0.2**

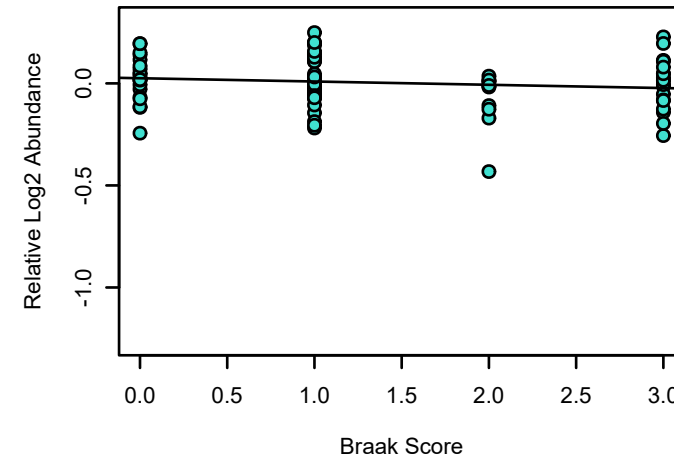

**bicor=0.0079, p=0.94**  
**cor=0.016, p=0.87**

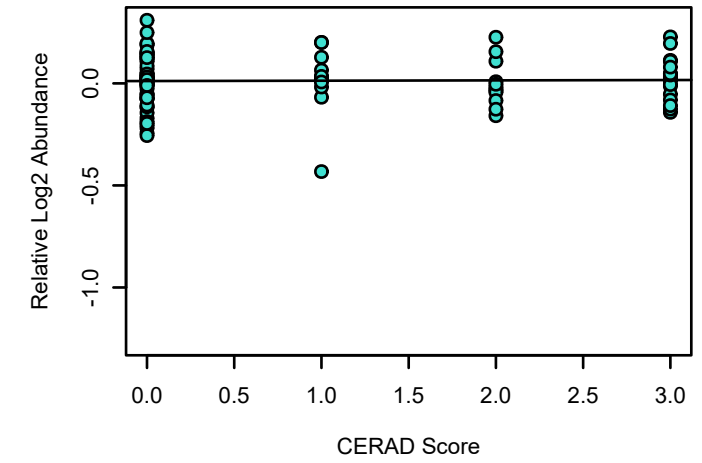

**DCTN2 UPenn Mixed PRM**  
**M2 blue MEGA module member**  
**K-W ANOVA p: 0.013**

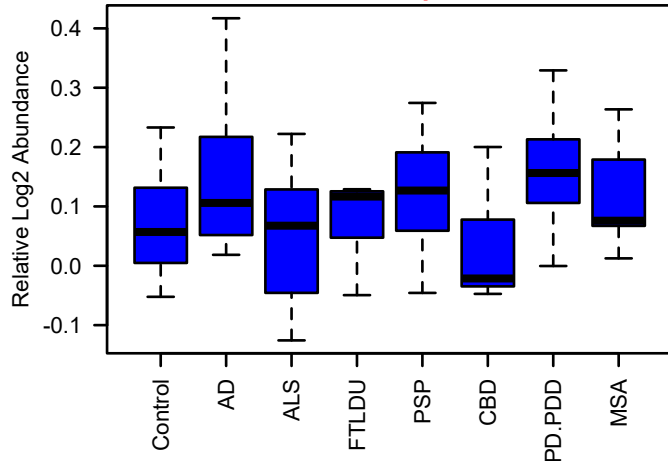

**DCTN2 UPenn Mixed PRM**  
**K-W ANOVA p: 0.13**

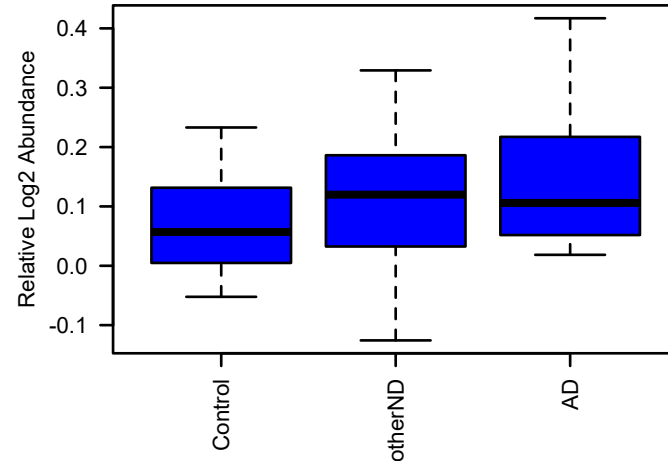

**bicor=0.22, p=0.04**  
**cor=0.25, p=0.022**

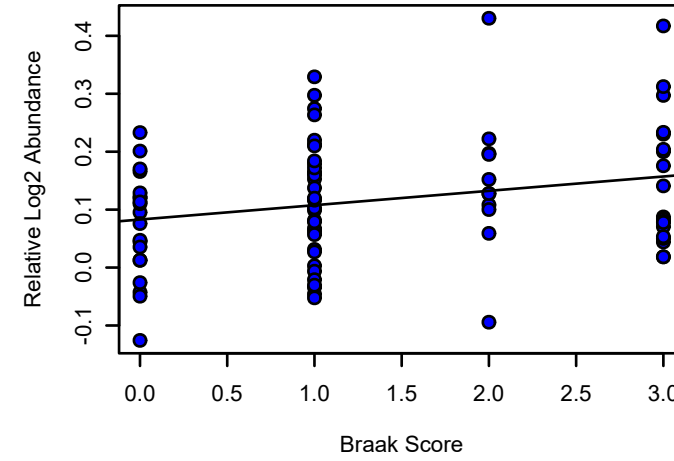

**bicor=0.17, p=0.082**  
**cor=0.19, p=0.058**

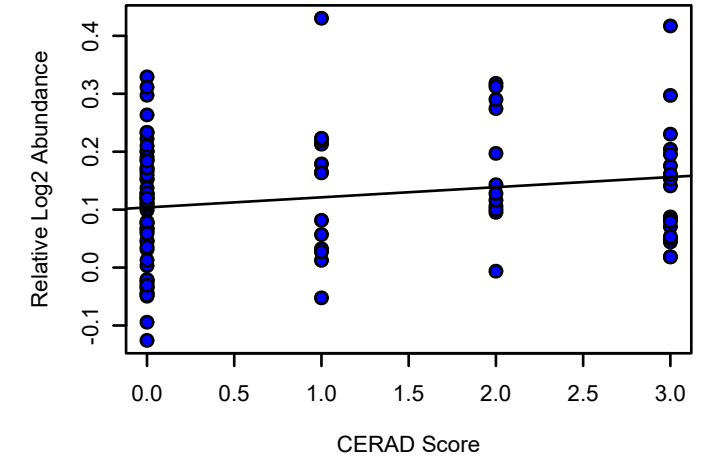

**AUH UPenn Mixed PRM**  
**M3 brown MEGA module member**  
**K-W ANOVA p: 0.3**

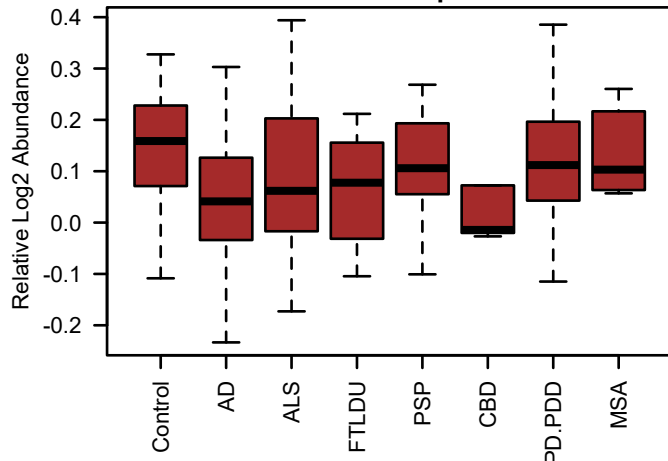

**AUH UPenn Mixed PRM**  
**K-W ANOVA p: 0.19**

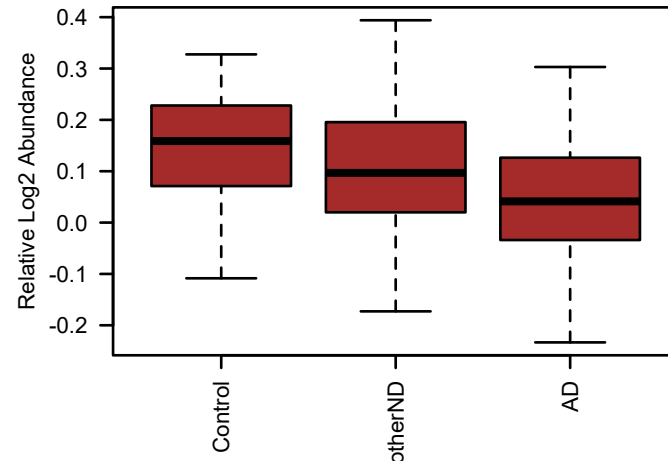

**bicor=-0.16, p=0.14**  
**cor=-0.18, p=0.1**

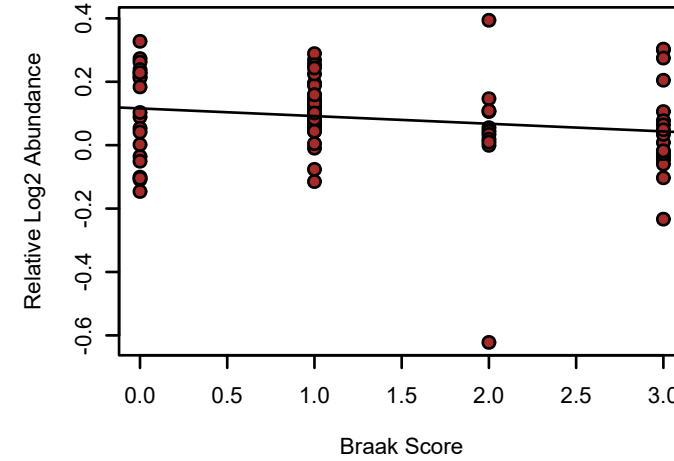

**bicor=-0.074, p=0.46**  
**cor=-0.067, p=0.51**

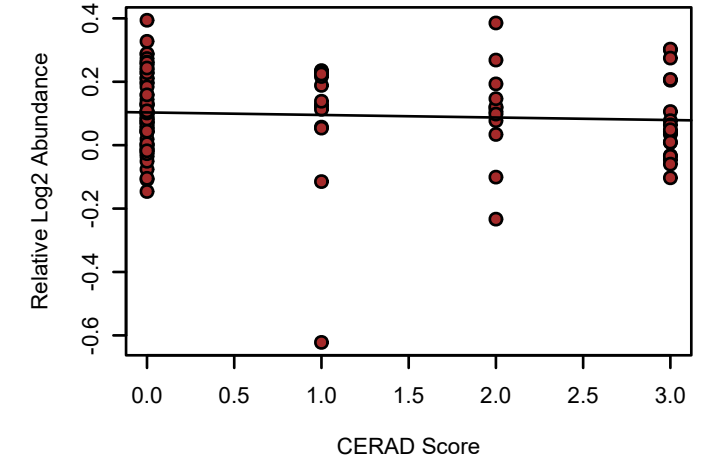

**SNTB1 UPenn Mixed PRM**  
**M4 yellow MEGA module member**  
**K-W ANOVA p: 0.00032**

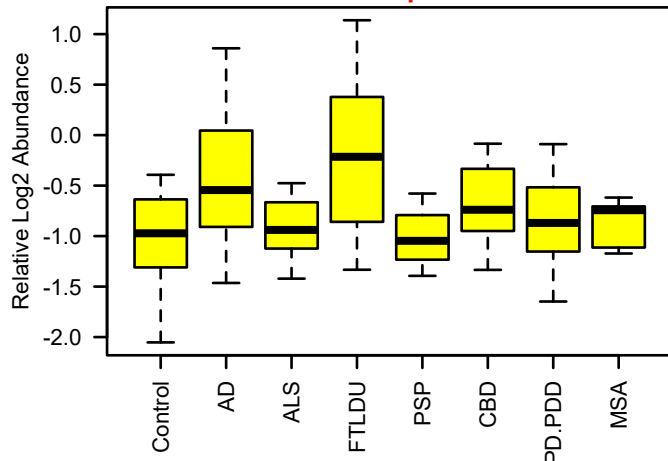

**SNTB1 UPenn Mixed PRM**  
**K-W ANOVA p: 0.0031**

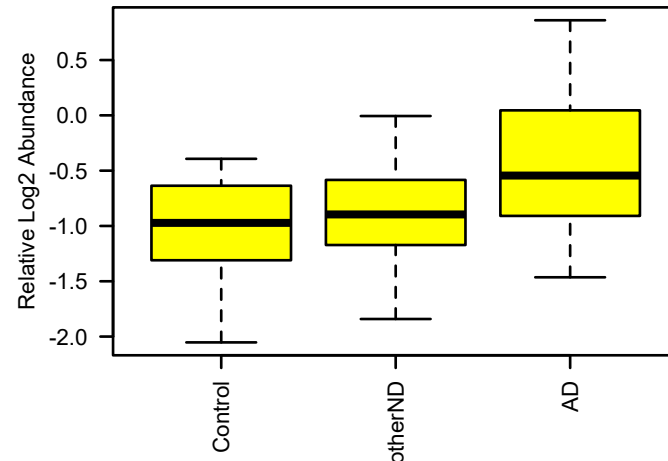

**bicor=0.18, p=0.094**  
**cor=0.23, p=0.035**

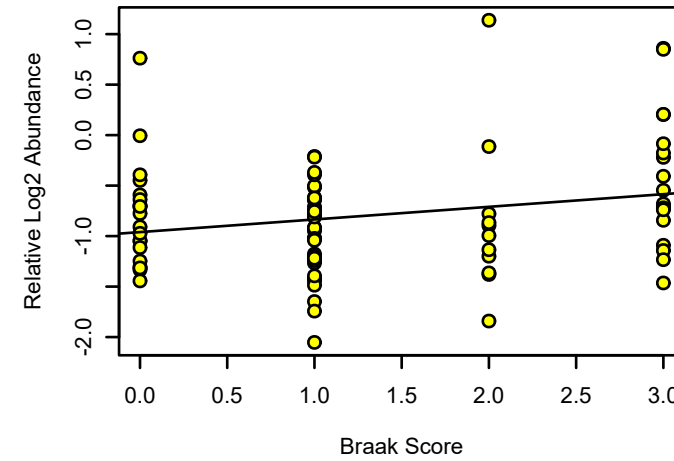

**bicor=0.31, p=0.002**  
**cor=0.3, p=0.0024**

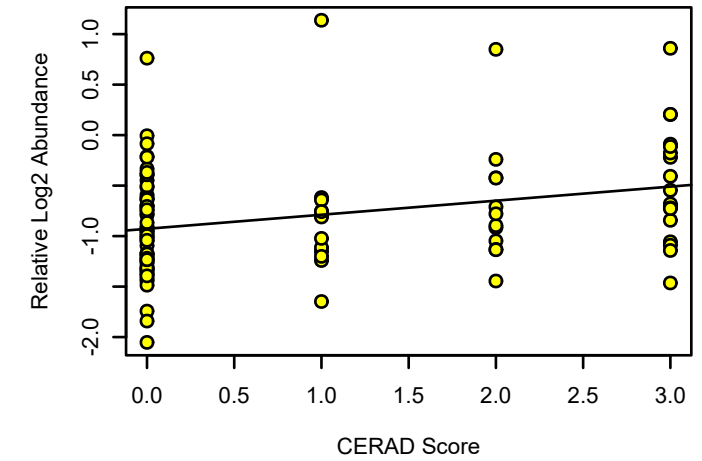

**CKAP5 UPenn Mixed PRM**  
NA grey MEGA module member  
K-W ANOVA p: 0.00023

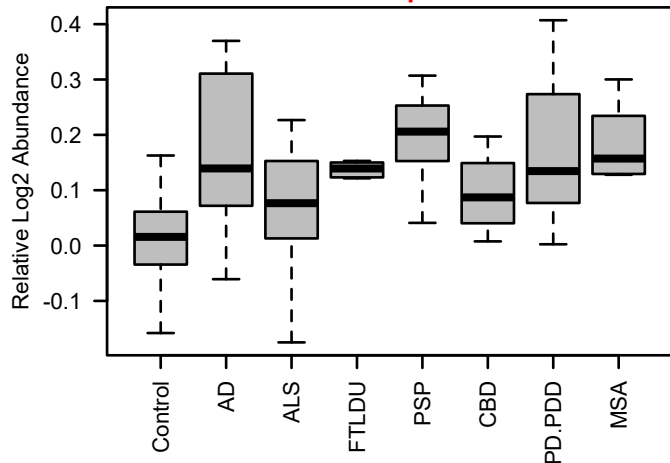

**CKAP5 UPenn Mixed PRM**  
K-W ANOVA p: 0.001

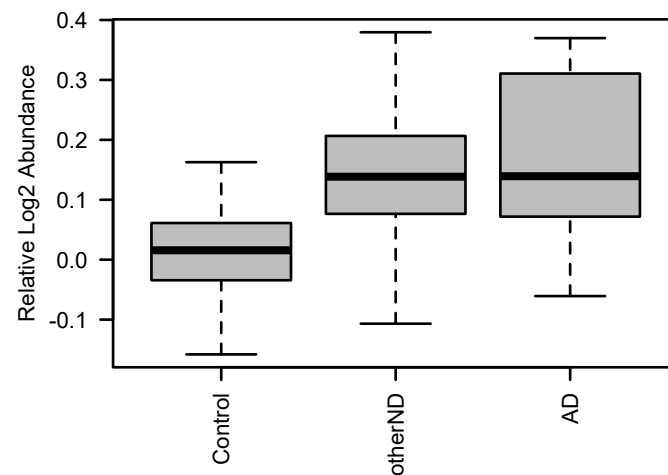

**bicor=0.17, p=0.12**  
**cor=0.19, p=0.083**

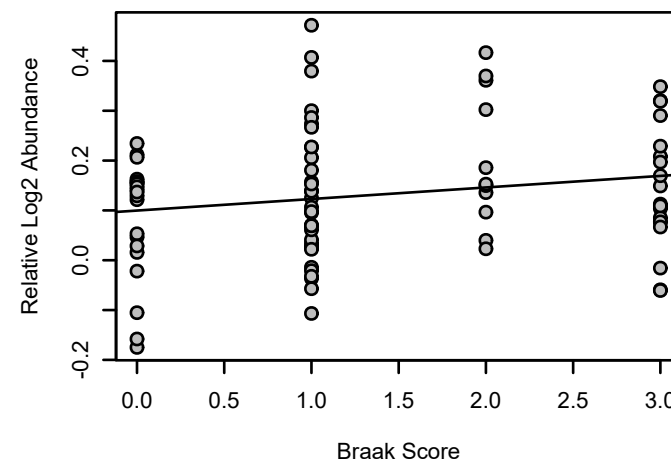

**bicor=0.13, p=0.2**  
**cor=0.14, p=0.16**

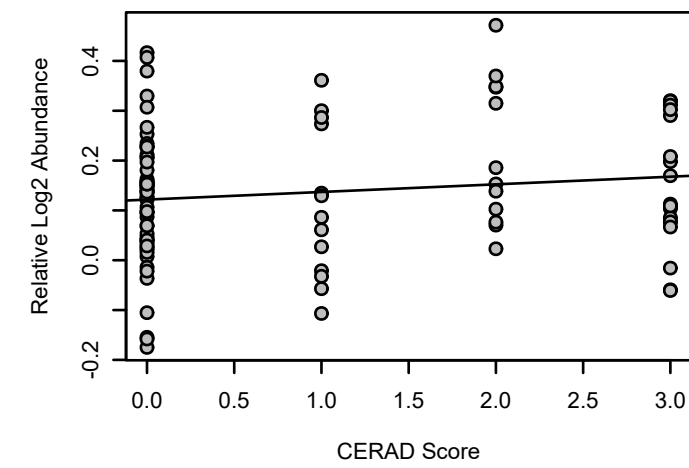

**DPYSL3 UPenn Mixed PRM**  
M4 yellow MEGA module member  
K-W ANOVA p: 0.02

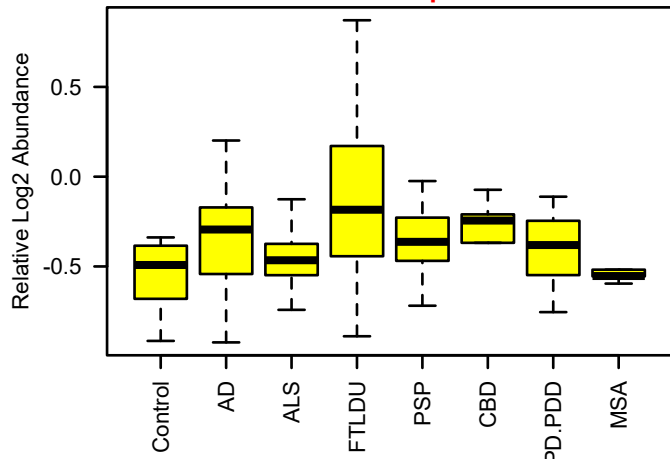

**DPYSL3 UPenn Mixed PRM**  
K-W ANOVA p: 0.059

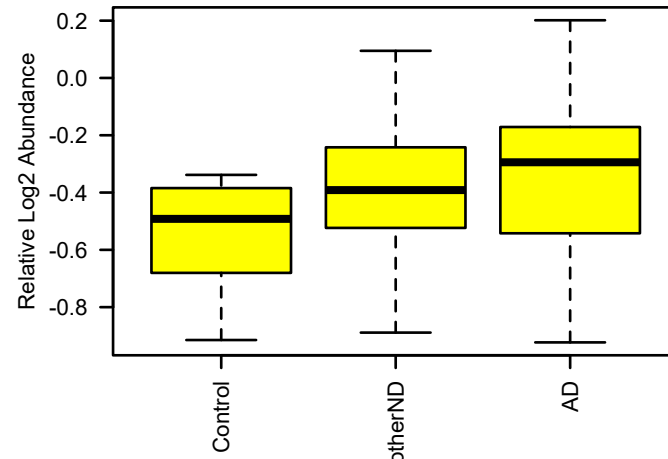

**bicor=0.2, p=0.073**  
**cor=0.22, p=0.044**

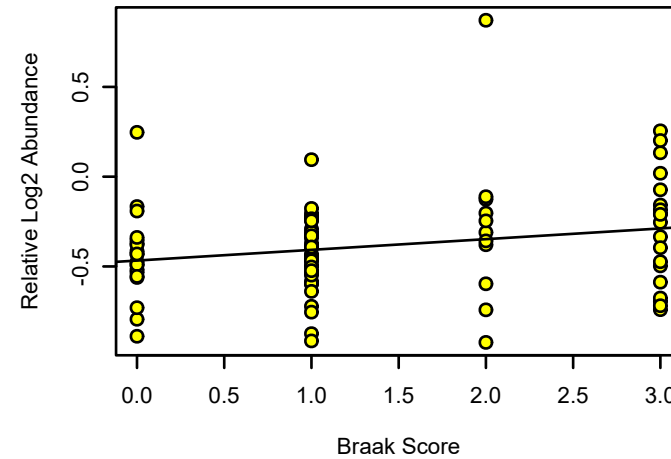

**bicor=0.24, p=0.015**  
**cor=0.22, p=0.028**

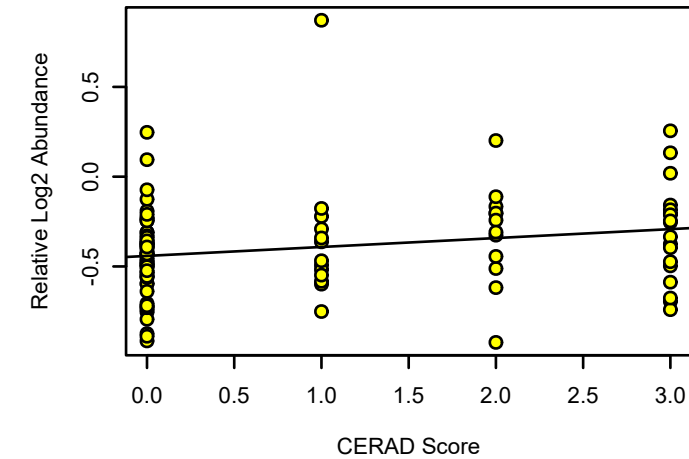

**DCTN1 UPenn Mixed PRM**  
M2 blue MEGA module member  
K-W ANOVA p: 0.051

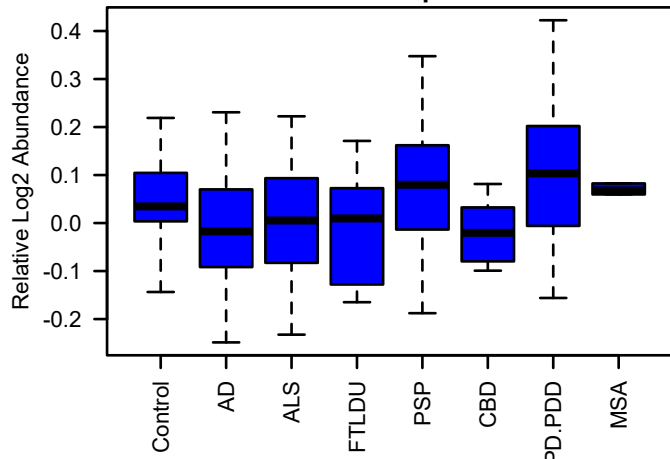

**DCTN1 UPenn Mixed PRM**  
K-W ANOVA p: 0.18

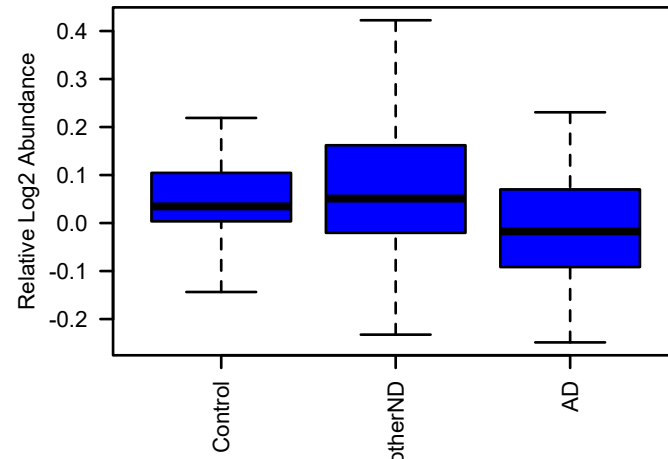

**bicor=-0.18, p=0.11**  
**cor=-0.21, p=0.055**

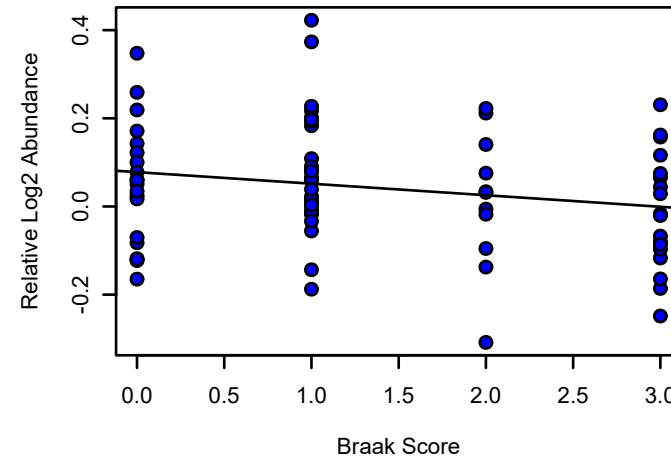

**bicor=-0.19, p=0.053**  
**cor=-0.18, p=0.073**

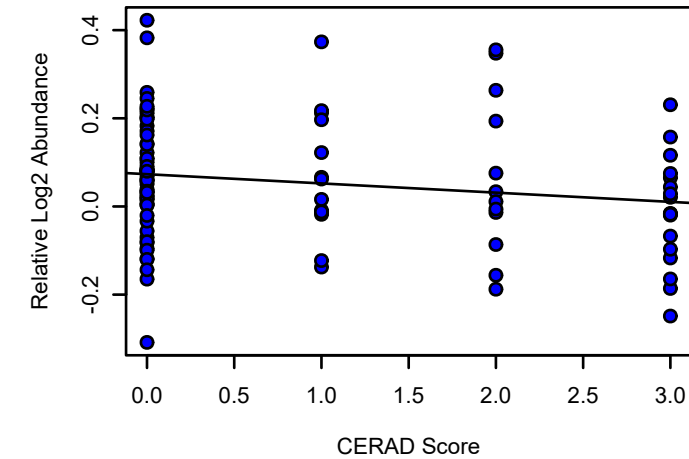

**PCDH18 UPenn Mixed PRM**  
NA grey20 MEGA module member  
K-W ANOVA p: 0.86

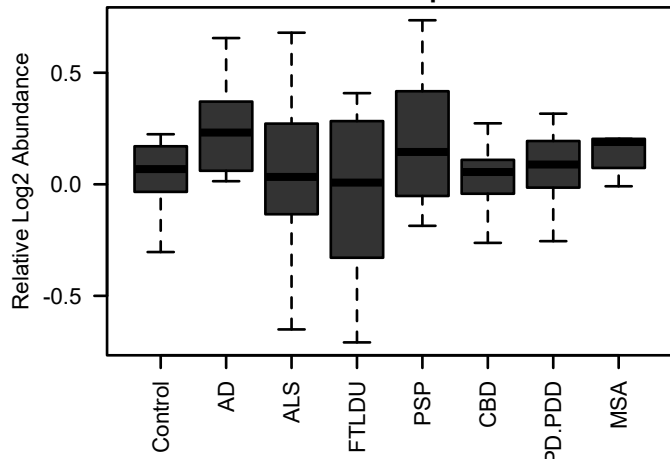

**PCDH18 UPenn Mixed PRM**  
K-W ANOVA p: 0.26

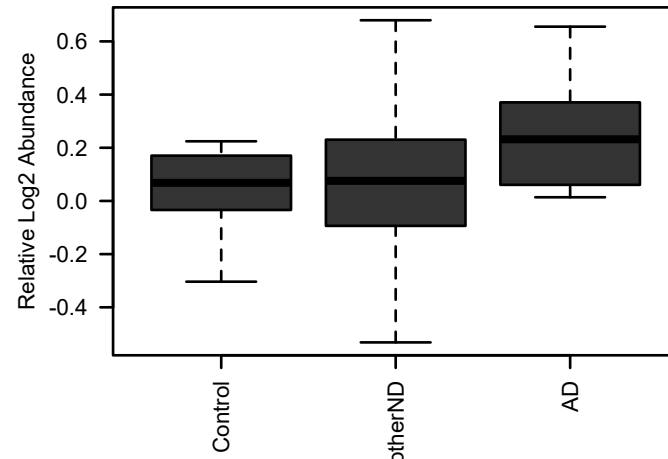

**bicor=0.28, p=0.0087**  
**cor=0.17, p=0.12**

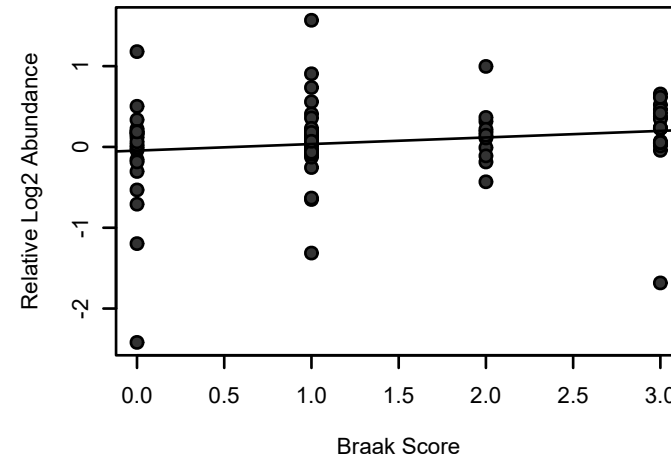

**bicor=0.21, p=0.035**  
**cor=-0.0049, p=0.96**

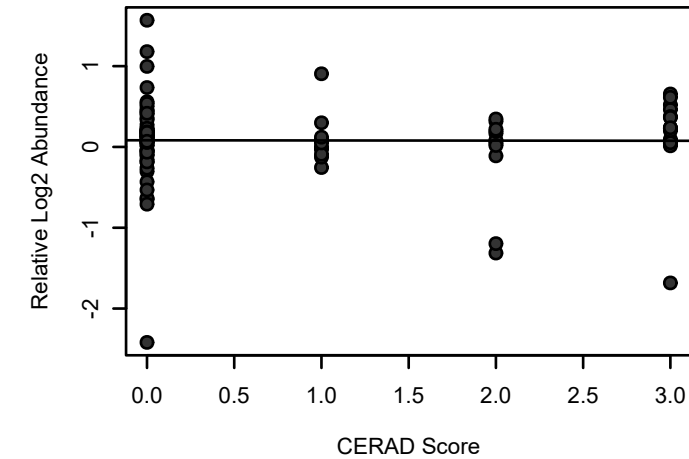

**DYNC1H1 UPenn Mixed PRM**  
M2 blue MEGA module member  
K-W ANOVA p: 0.0035

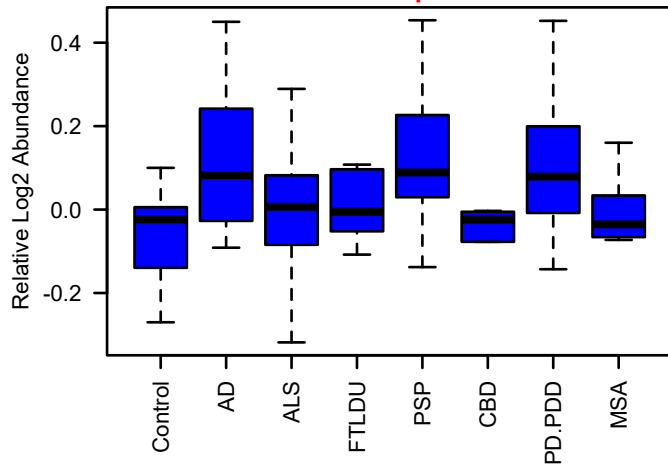

**DYNC1H1 UPenn Mixed PRM**  
K-W ANOVA p: 0.009

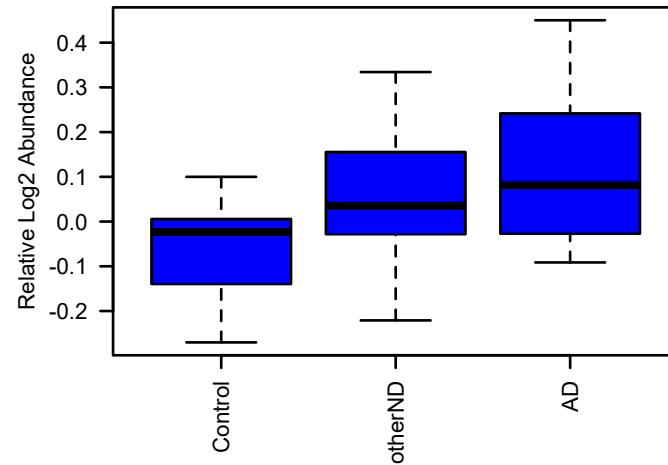

**bicor=0.27, p=0.012**  
**cor=0.27, p=0.013**

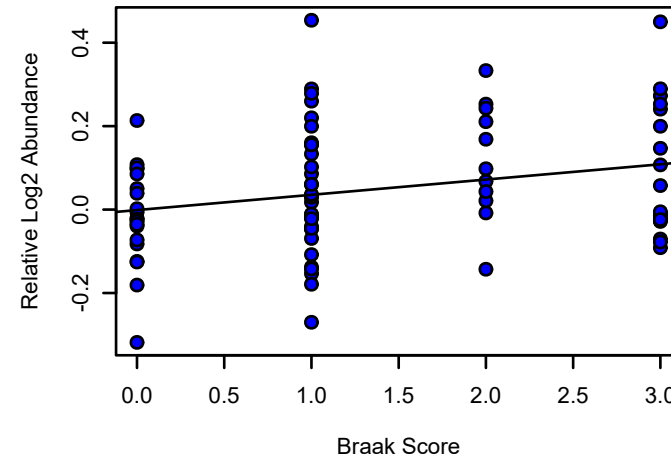

**bicor=0.15, p=0.13**  
**cor=0.19, p=0.058**

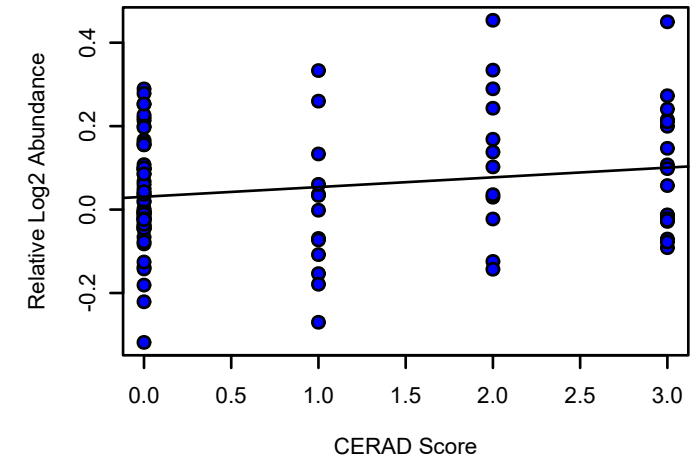

**GNA13 UPenn Mixed PRM**  
M4 yellow MEGA module member  
K-W ANOVA p: 0.00013

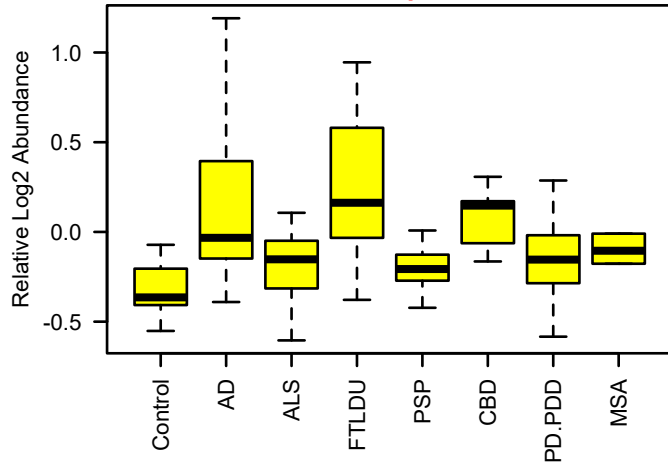

**GNA13 UPenn Mixed PRM**  
K-W ANOVA p: 0.00052

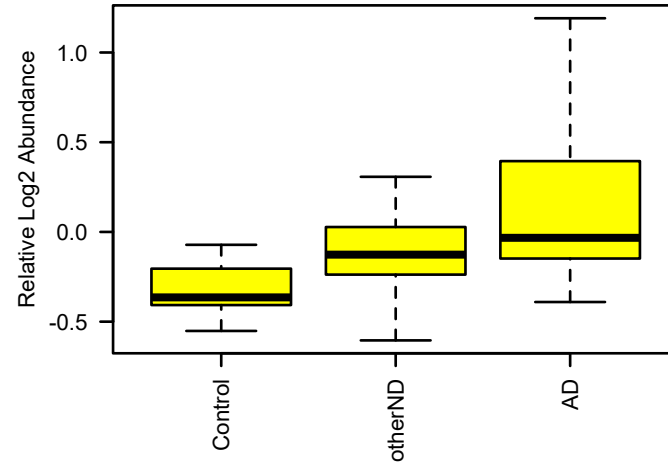

**bicor=0.33, p=0.0026**  
**cor=0.33, p=0.0022**

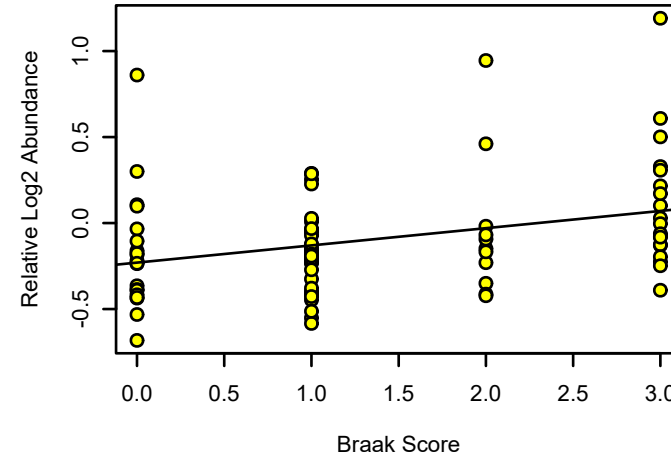

**bicor=0.23, p=0.019**  
**cor=0.26, p=0.009**

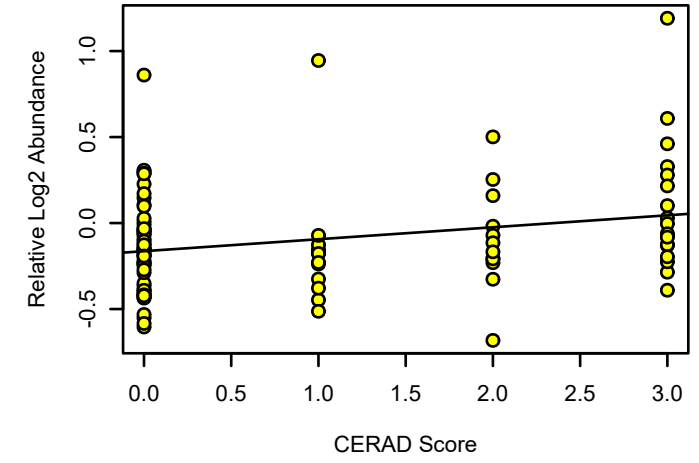

**PLEC UPenn Mixed PRM**  
M4 yellow MEGA module member  
K-W ANOVA p: 2.7e-06

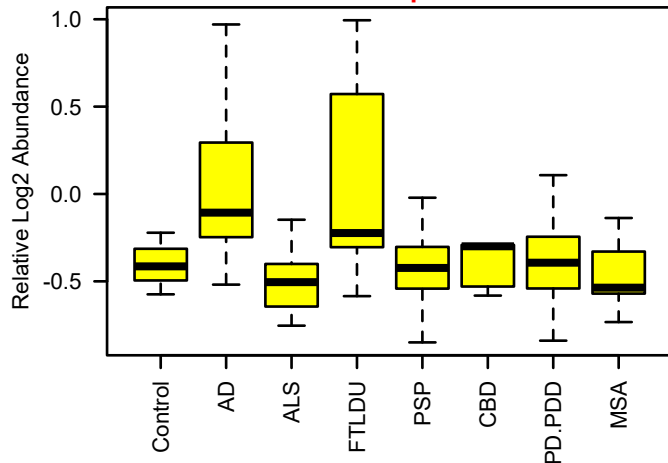

**PLEC UPenn Mixed PRM**  
K-W ANOVA p: 2e-04

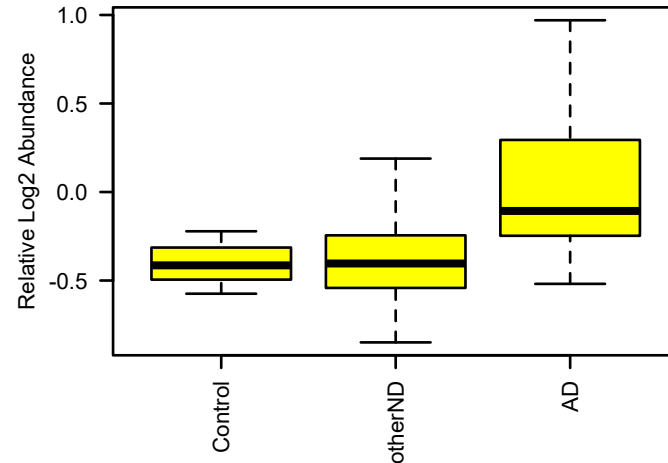

**bicor=0.35, p=0.00093**  
**cor=0.33, p=0.0022**

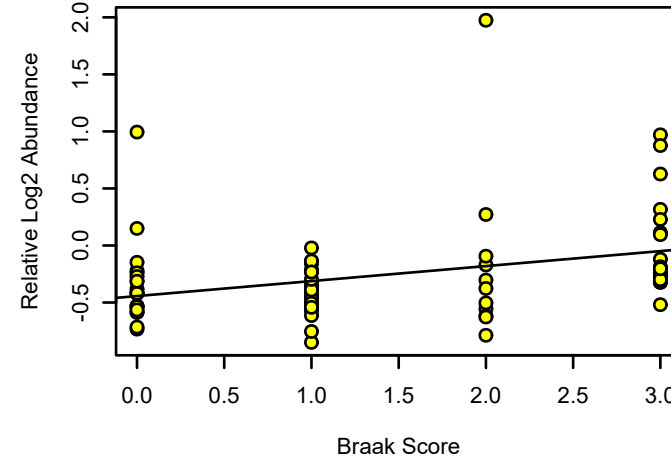

**bicor=0.36, p=0.00029**  
**cor=0.31, p=0.0017**

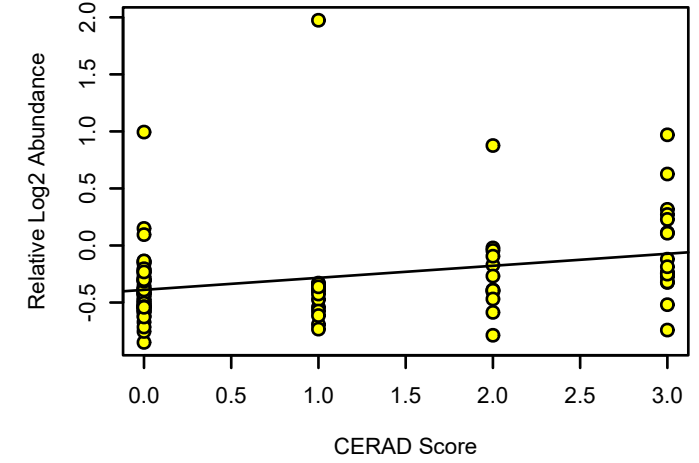

**NONO UPenn Mixed PRM**  
M10 purple MEGA module member  
K-W ANOVA p: 0.0041

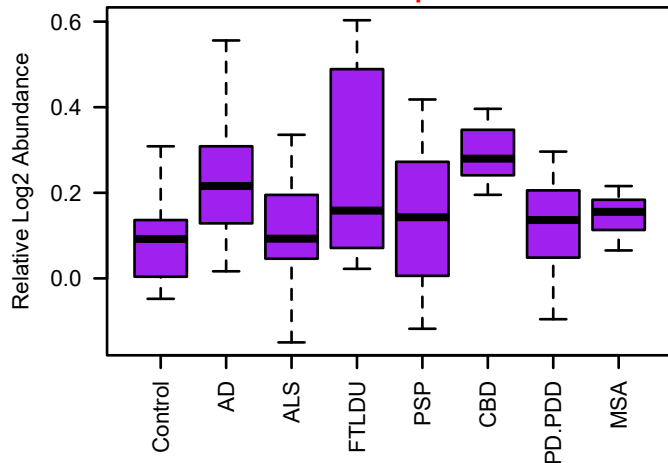

**NONO UPenn Mixed PRM**  
K-W ANOVA p: 0.016

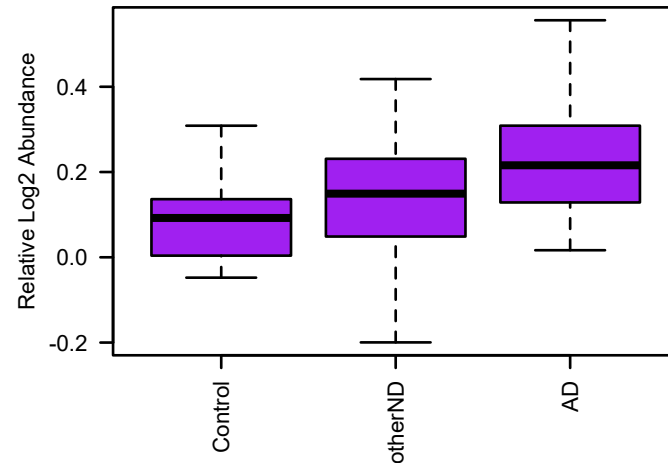

**bicor=0.31, p=0.0042**  
**cor=0.27, p=0.013**

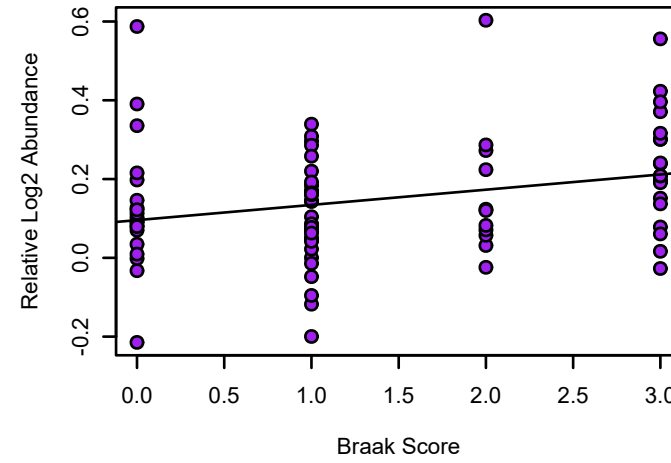

**bicor=0.13, p=0.19**  
**cor=0.13, p=0.2**

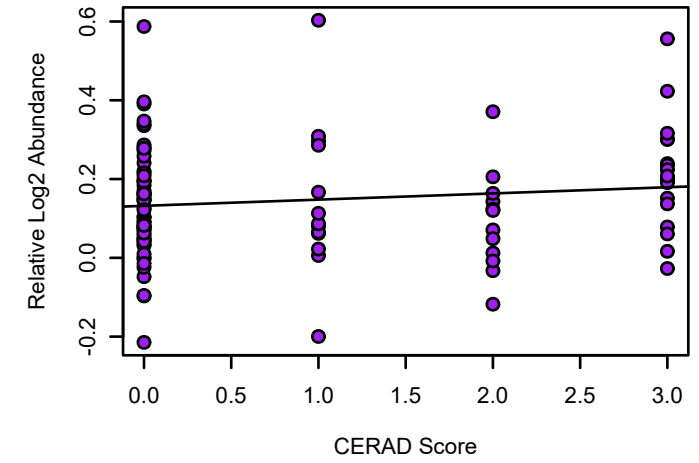

**PPP1R7 UPenn Mixed PRM**  
NA grey MEGA module member  
K-W ANOVA p: 0.21

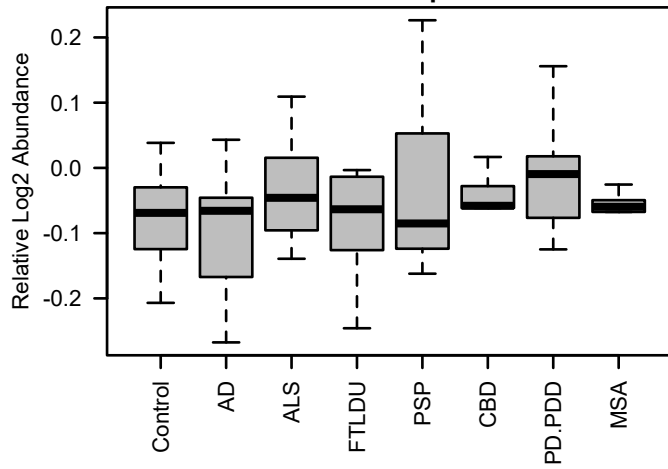

**PPP1R7 UPenn Mixed PRM**  
K-W ANOVA p: 0.024

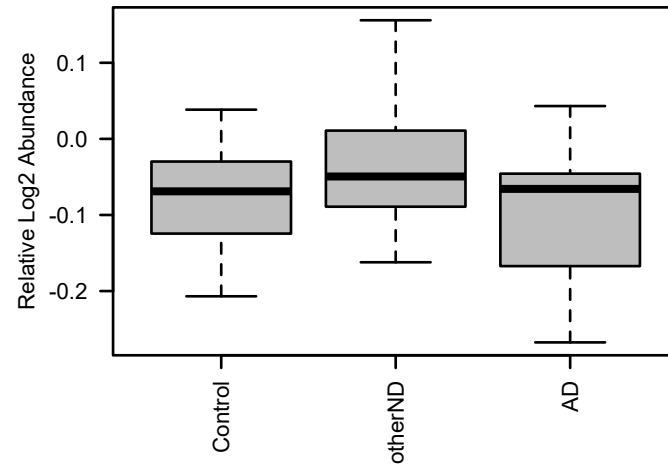

**bicor=-0.039, p=0.72**  
**cor=-0.013, p=0.91**

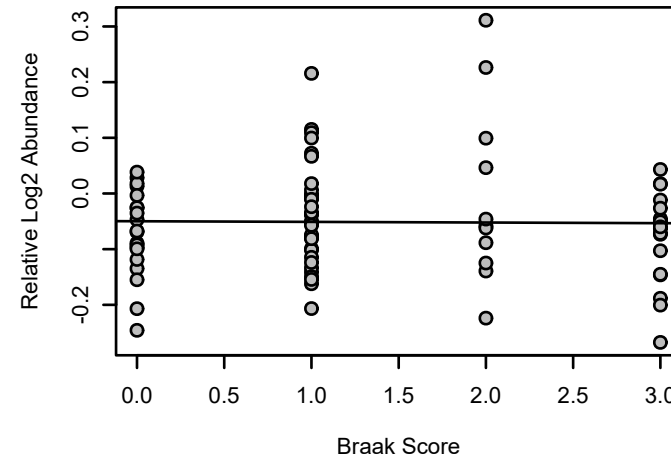

**bicor=-0.12, p=0.22**  
**cor=-0.12, p=0.23**

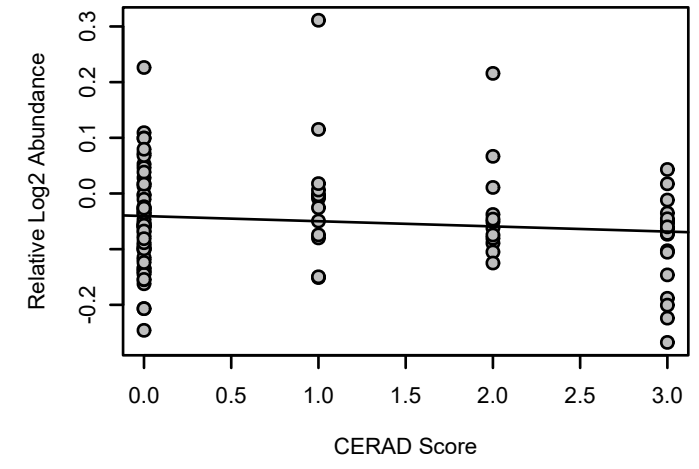

**ADIRF UPenn Mixed PRM**  
M4 yellow MEGA module member  
K-W ANOVA p: 0.0041

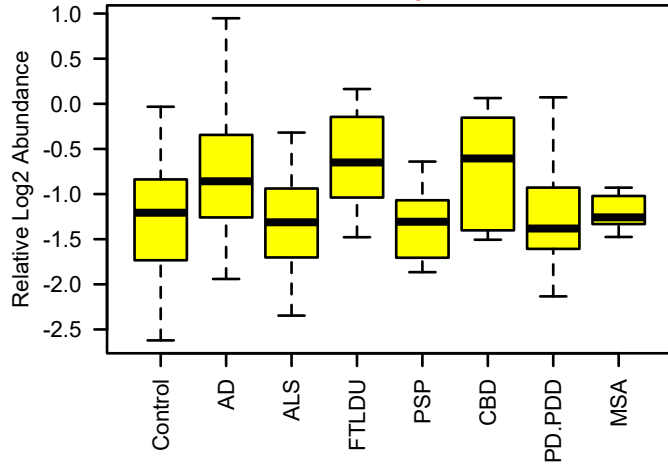

**ADIRF UPenn Mixed PRM**  
K-W ANOVA p: 0.031

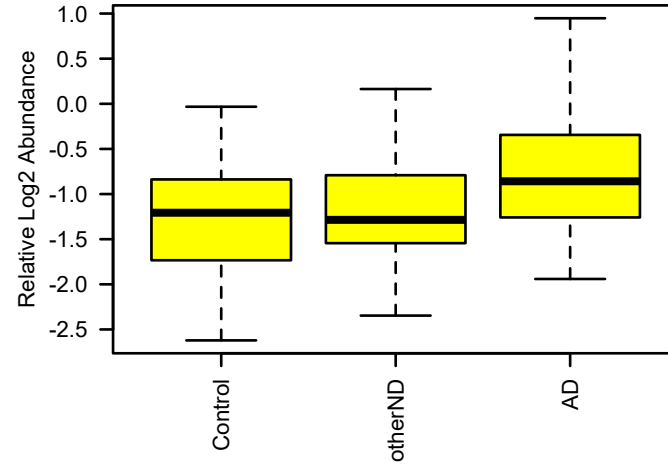

**bicor=0.23, p=0.035**  
**cor=0.26, p=0.017**

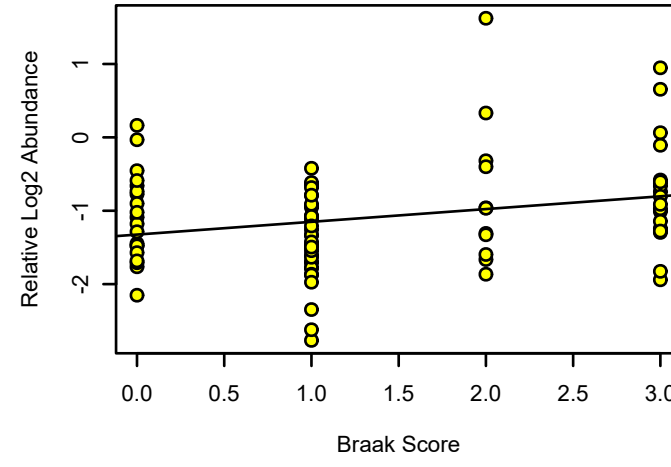

**bicor=0.27, p=0.0076**  
**cor=0.26, p=0.009**

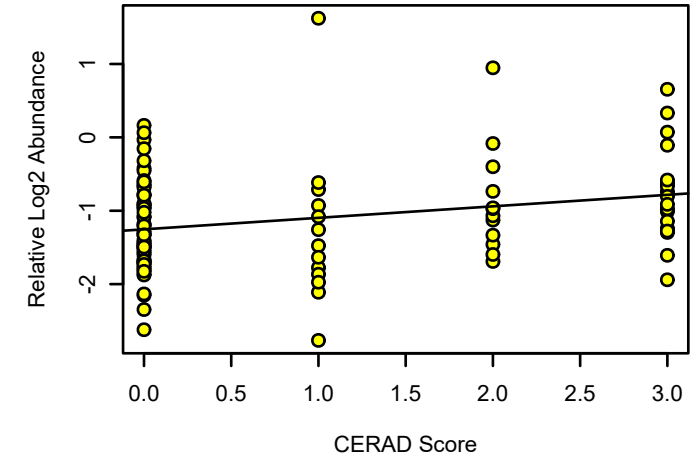

**STX1A UPenn Mixed PRM**  
M1 turquoise MEGA module member  
K-W ANOVA p: 2.2e-05

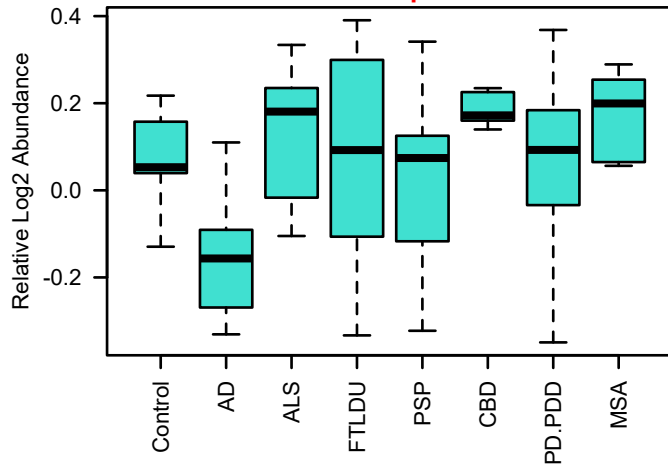

**STX1A UPenn Mixed PRM**  
K-W ANOVA p: 4.3e-07

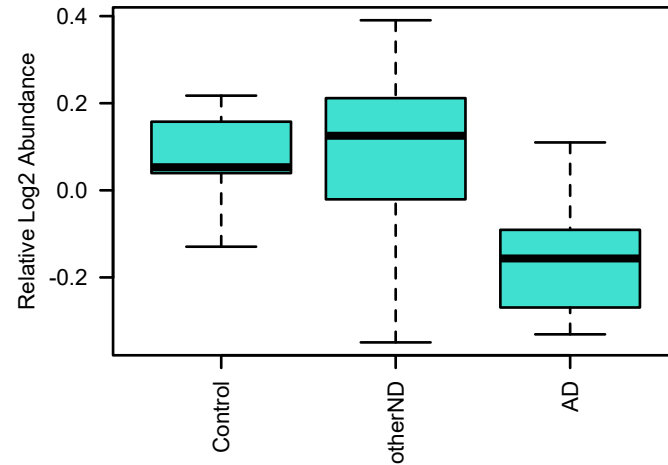

**bicor=-0.41, p=0.00013**  
**cor=-0.4, p=0.00016**

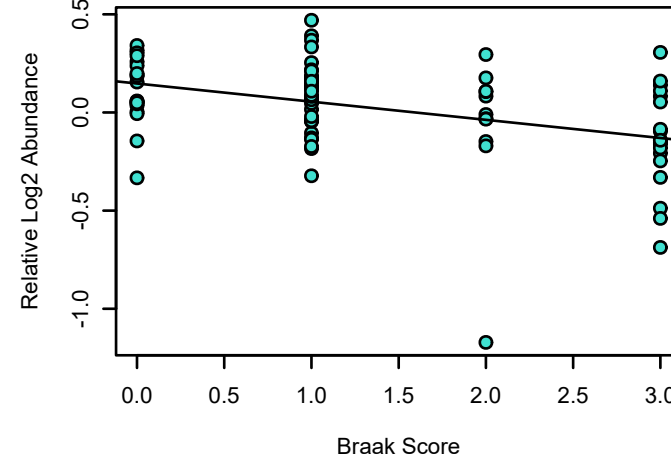

**bicor=-0.38, p=9.4e-05**  
**cor=-0.41, p=2.3e-05**

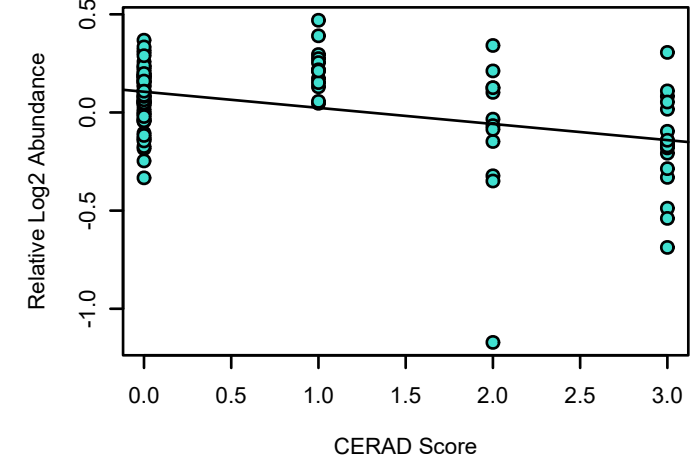

**NDUFA9 UPenn Mixed PRM**  
M3 brown MEGA module member  
K-W ANOVA p: 0.0019

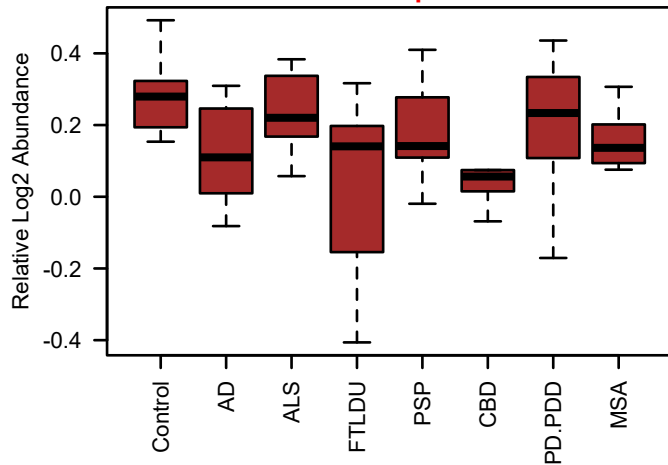

**NDUFA9 UPenn Mixed PRM**  
K-W ANOVA p: 0.013

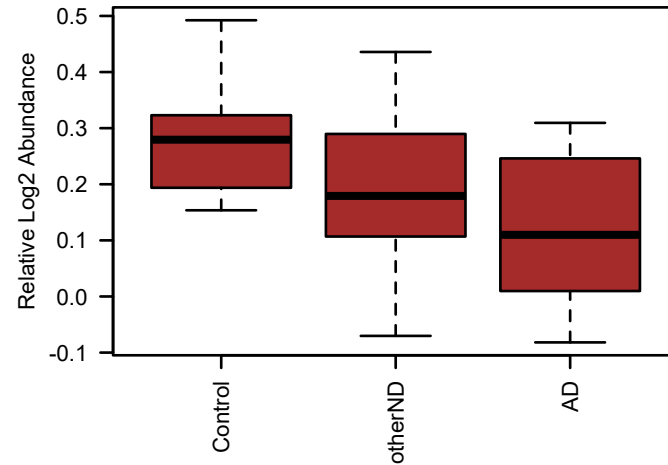

**bicor=-0.26, p=0.018**  
**cor=-0.25, p=0.022**

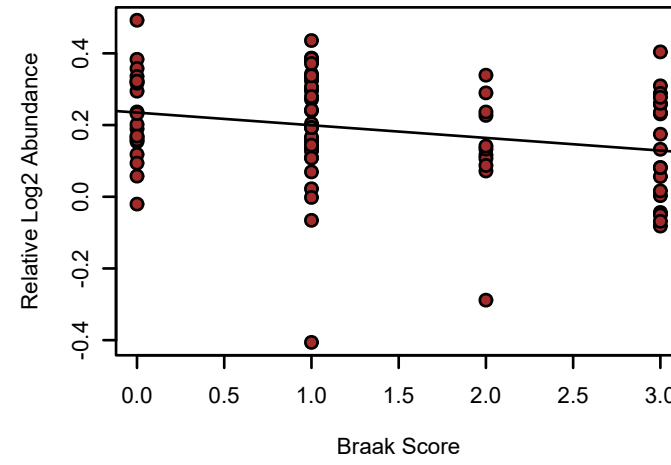

**bicor=-0.19, p=0.059**  
**cor=-0.18, p=0.073**

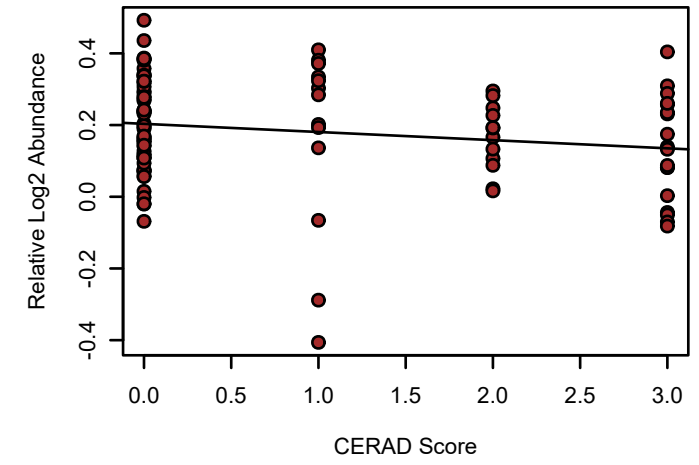



**RTN1 UPenn Mixed PRM**  
**M6 red MEGA module member**  
**K-W ANOVA p: 0.0039**

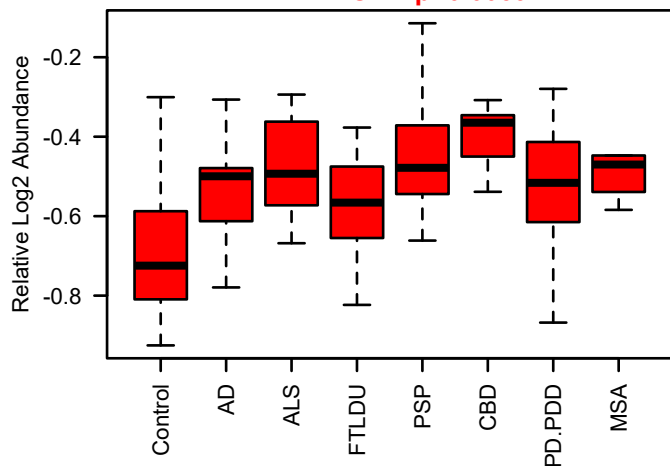

**RTN1 UPenn Mixed PRM**  
**K-W ANOVA p: 0.00056**

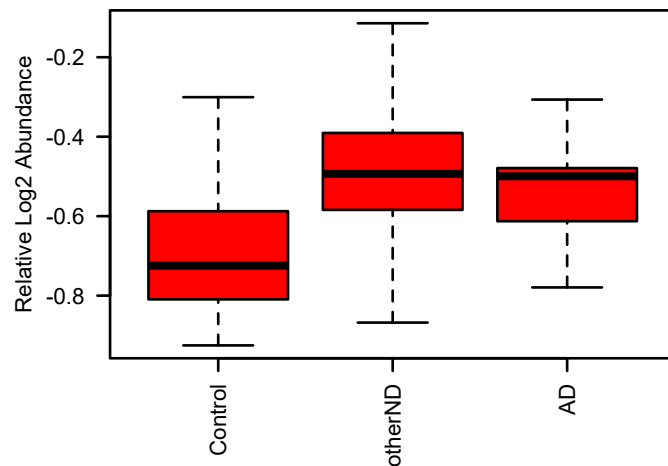

**bicor=0.021, p=0.85**  
**cor=0.036, p=0.75**

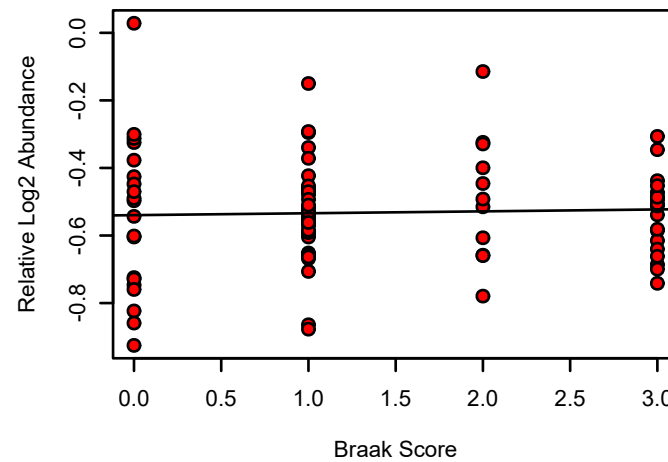

**bicor=-0.011, p=0.91**  
**cor=-0.021, p=0.84**

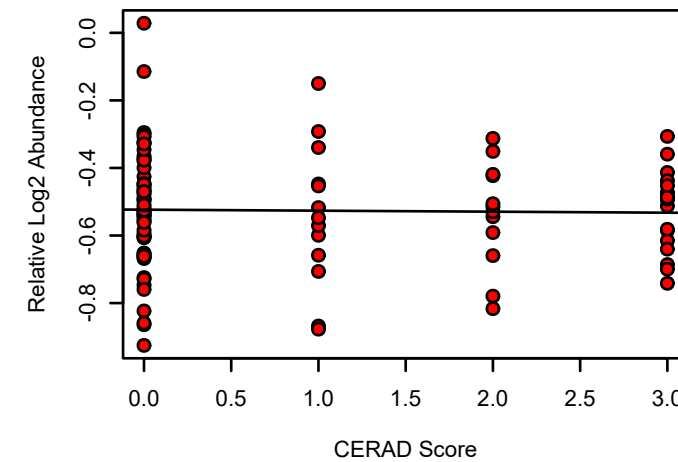

**IMMT UPenn Mixed PRM**  
**M3 brown MEGA module member**  
**K-W ANOVA p: 0.029**

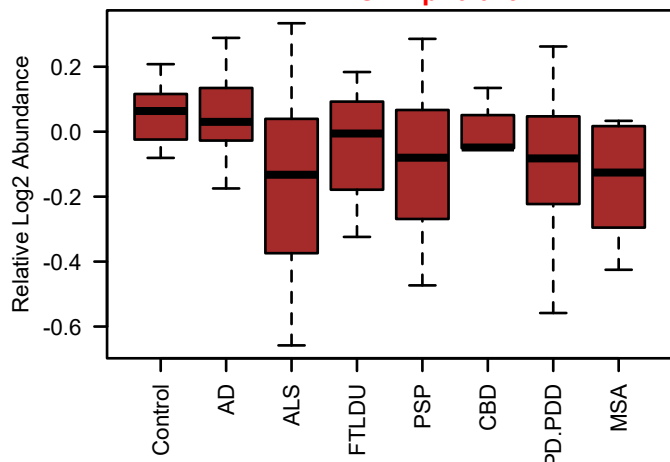

**IMMT UPenn Mixed PRM**  
**K-W ANOVA p: 0.0015**

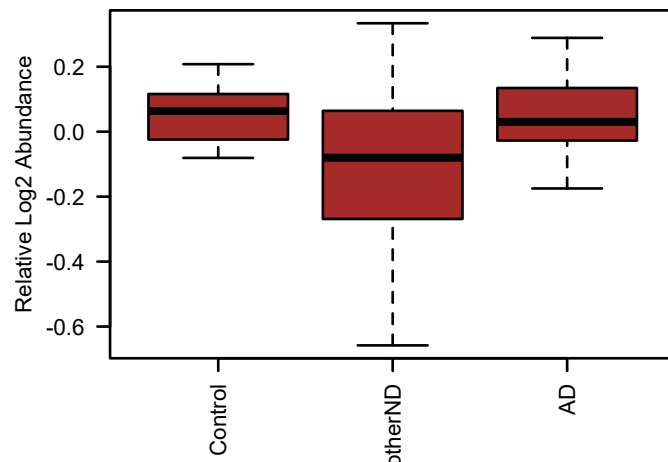

**bicor=0.032, p=0.77**  
**cor=0.083, p=0.45**

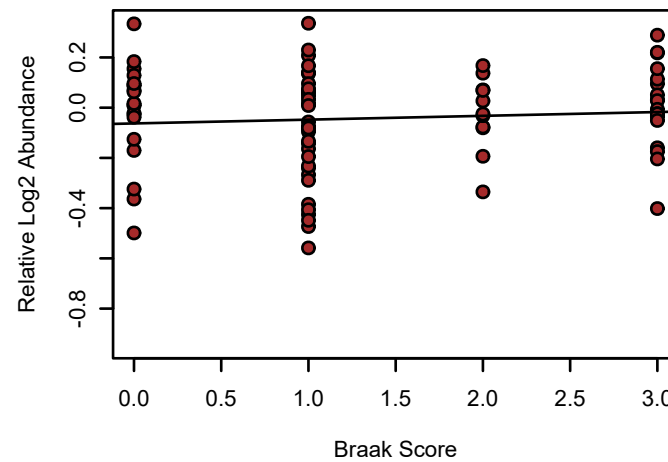

**bicor=0.15, p=0.15**  
**cor=0.14, p=0.16**

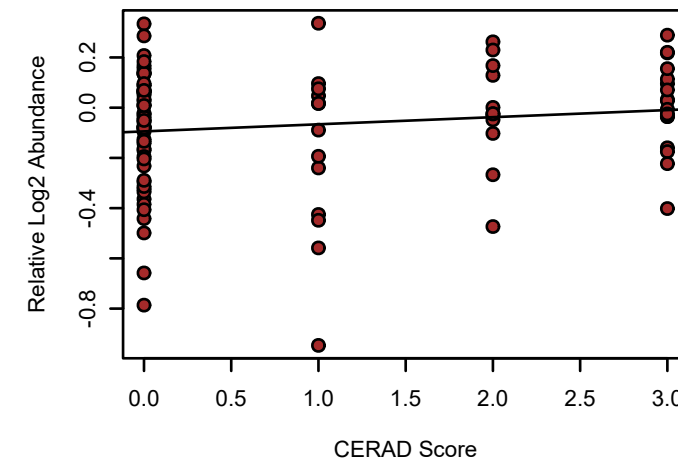

**INF2 UPenn Mixed PRM**  
**M2 blue MEGA module member**  
**K-W ANOVA p: 0.29**

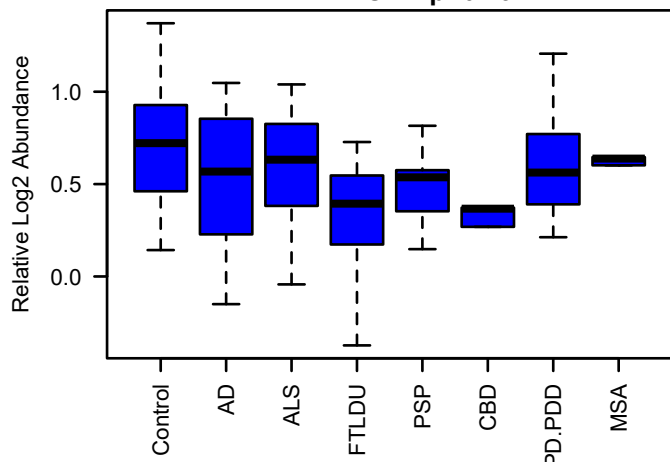

**INF2 UPenn Mixed PRM**  
**K-W ANOVA p: 0.35**

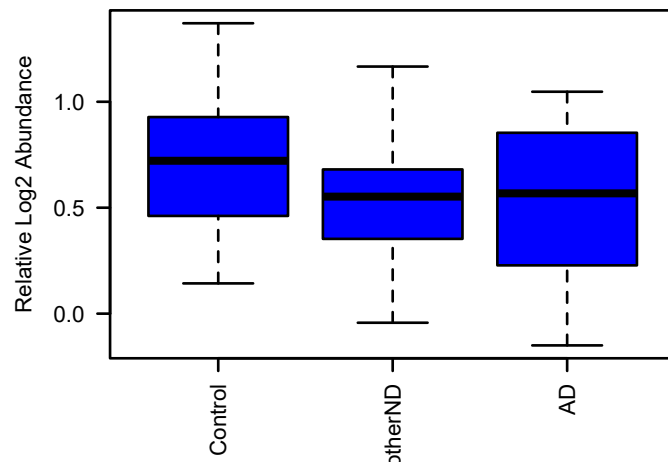

**bicor=-0.087, p=0.43**  
**cor=-0.083, p=0.45**

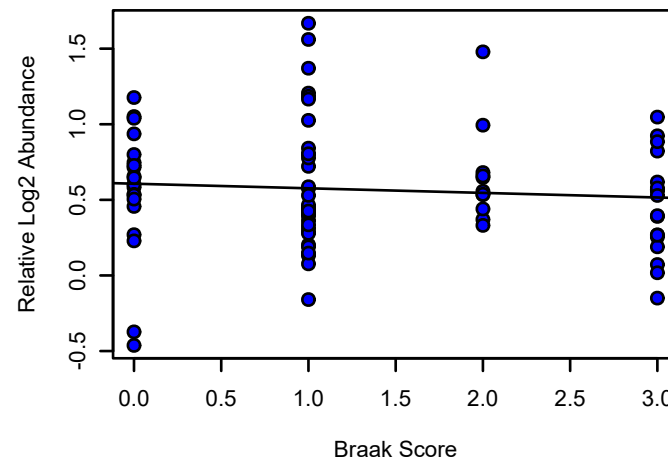

**bicor=-0.093, p=0.36**  
**cor=-0.087, p=0.39**

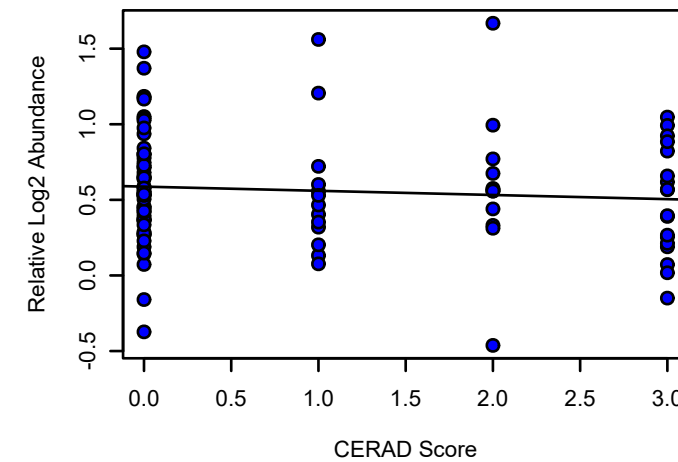

**AAK1 UPenn Mixed PRM**  
**M6 red MEGA module member**  
**K-W ANOVA p: 0.037**

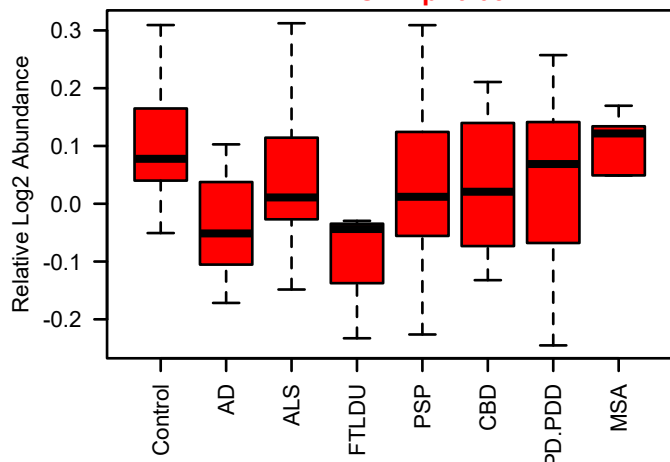

**AAK1 UPenn Mixed PRM**  
**K-W ANOVA p: 0.019**

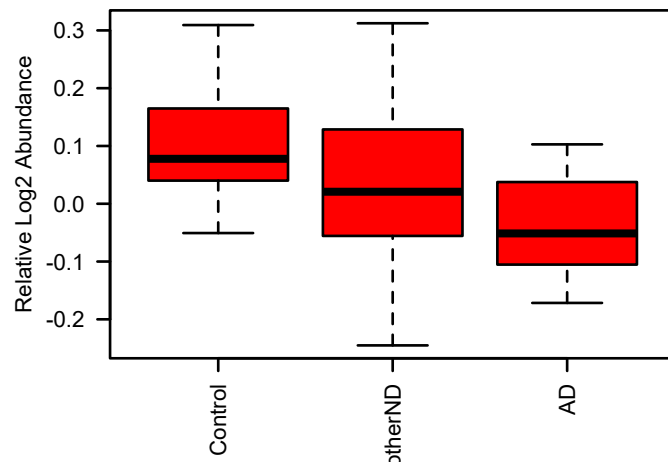

**bicor=-0.26, p=0.016**  
**cor=-0.25, p=0.022**

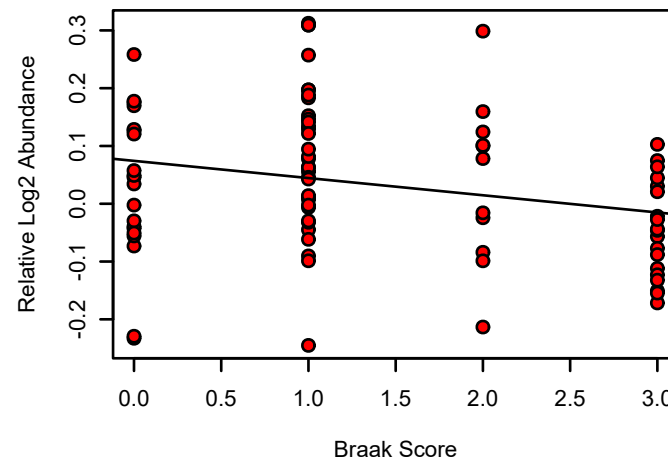

**bicor=-0.22, p=0.029**  
**cor=-0.21, p=0.036**

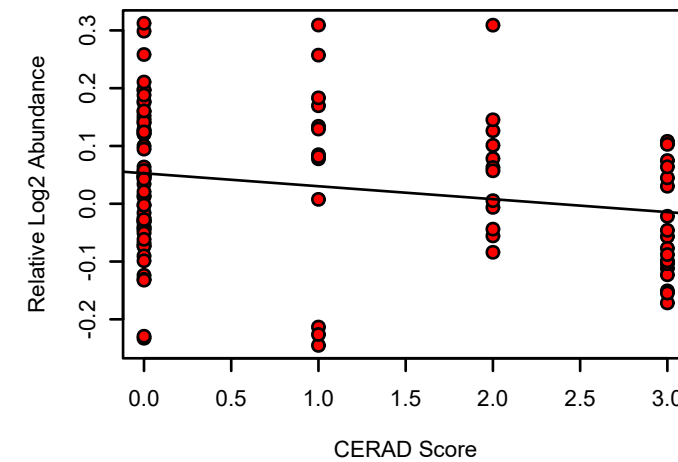

**PREPL UPenn Mixed PRM**  
NA grey MEGA module member  
K-W ANOVA p: 0.00062

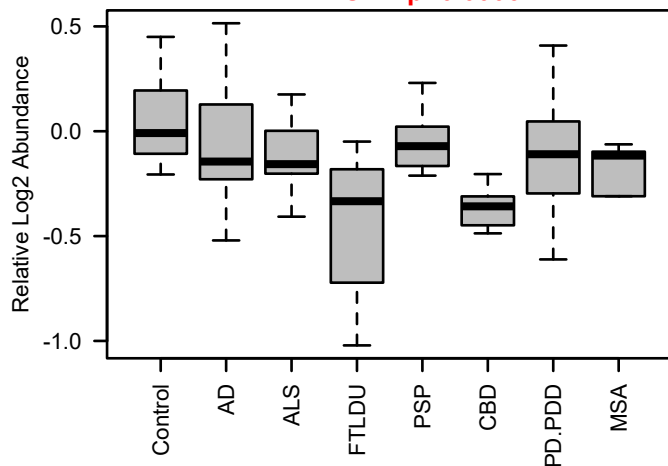

**PREPL UPenn Mixed PRM**  
K-W ANOVA p: 0.0089

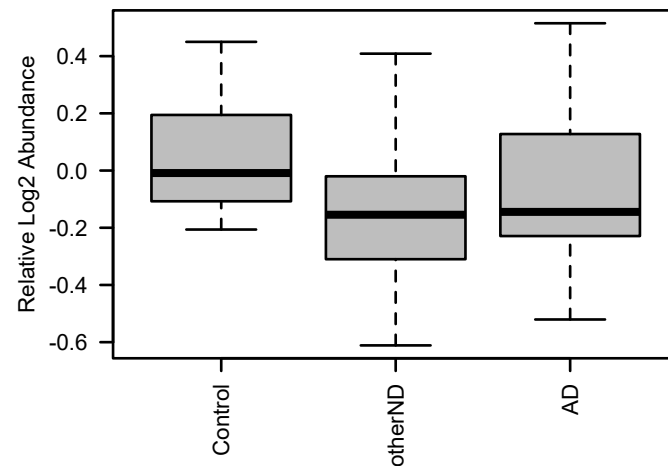

**bicor=-0.015, p=0.89**  
**cor=-0.026, p=0.81**

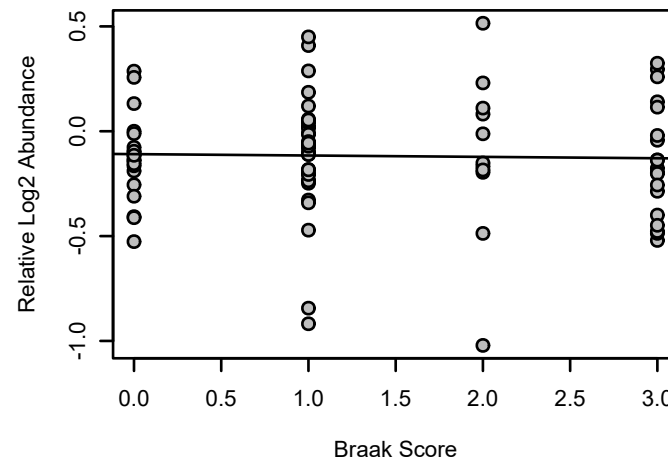

**bicor=0.016, p=0.87**  
**cor=0.017, p=0.87**

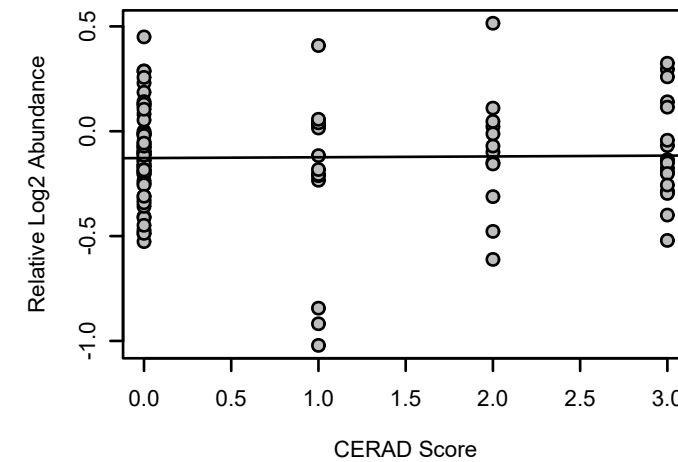

**FHL1 UPenn Mixed PRM**  
M4 yellow MEGA module member  
K-W ANOVA p: 6.9e-07

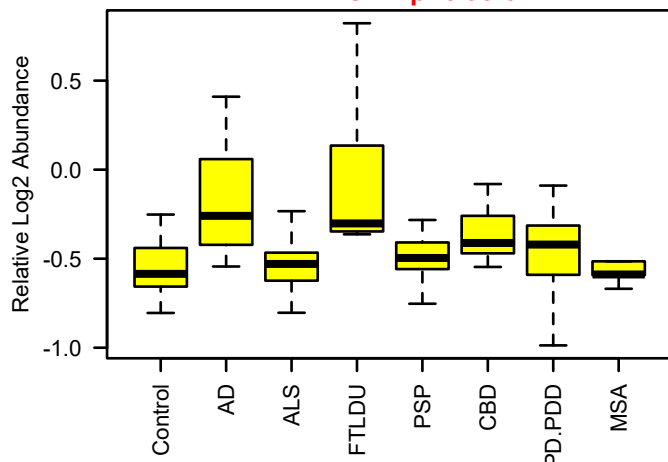

**FHL1 UPenn Mixed PRM**  
K-W ANOVA p: 0.00011

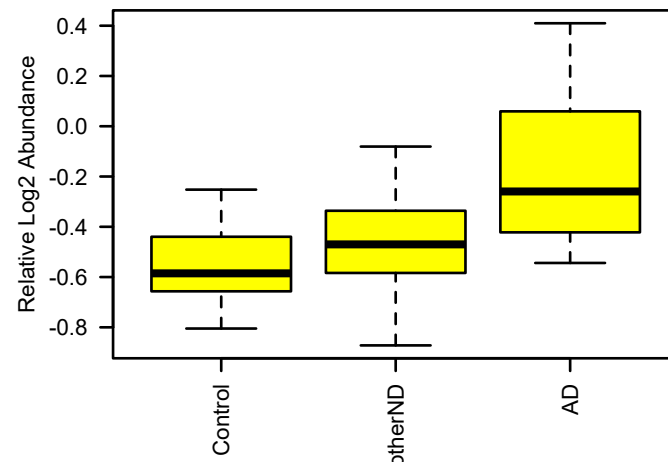

**bicor=0.39, p=2e-04**  
**cor=0.35, p=0.0011**

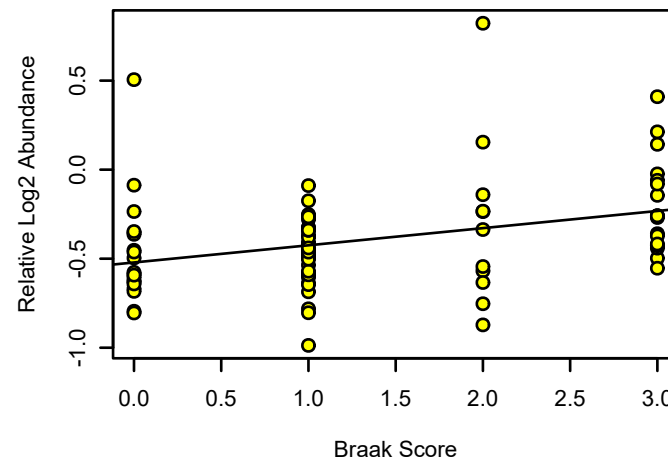

**bicor=0.4, p=4.4e-05**  
**cor=0.34, p=0.00054**

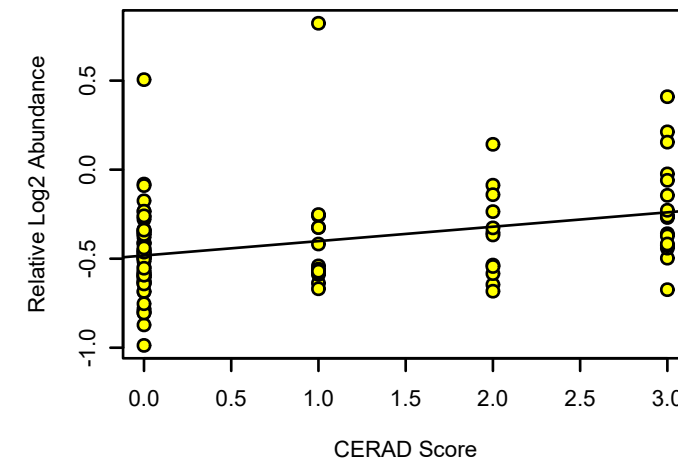

**HMGB1 UPenn Mixed PRM**  
M10 purple MEGA module member  
K-W ANOVA p: 0.18

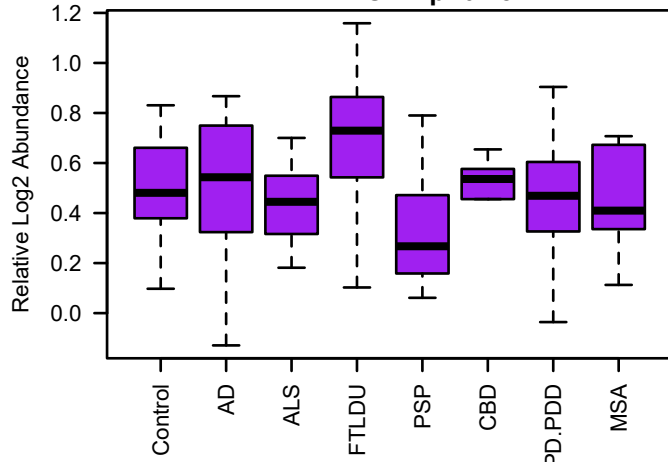

**HMGB1 UPenn Mixed PRM**  
K-W ANOVA p: 0.28

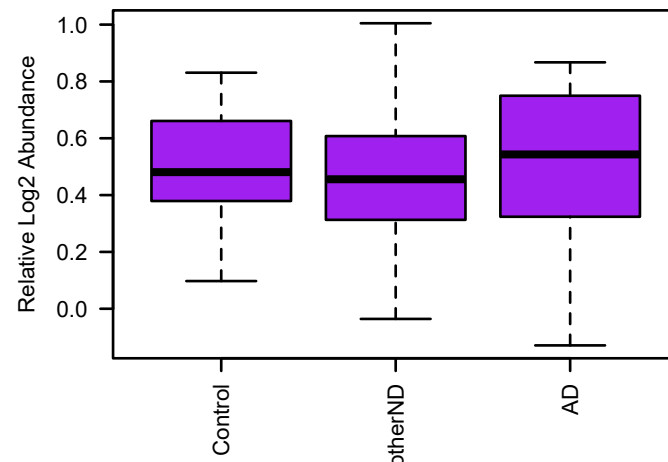

**bicor=0.025, p=0.82**  
**cor=0.13, p=0.24**

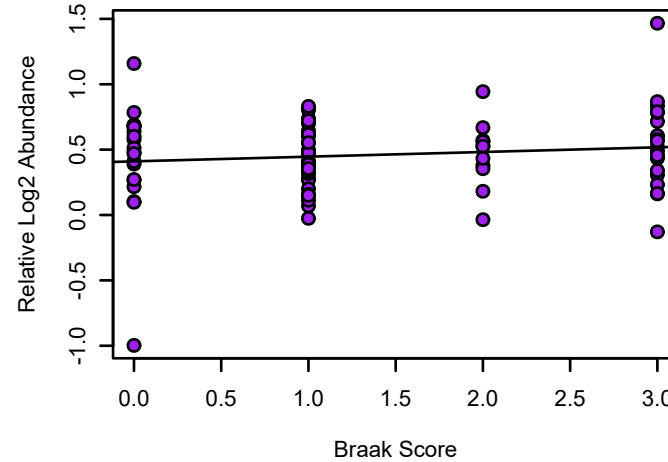

**bicor=0.048, p=0.63**  
**cor=0.12, p=0.23**

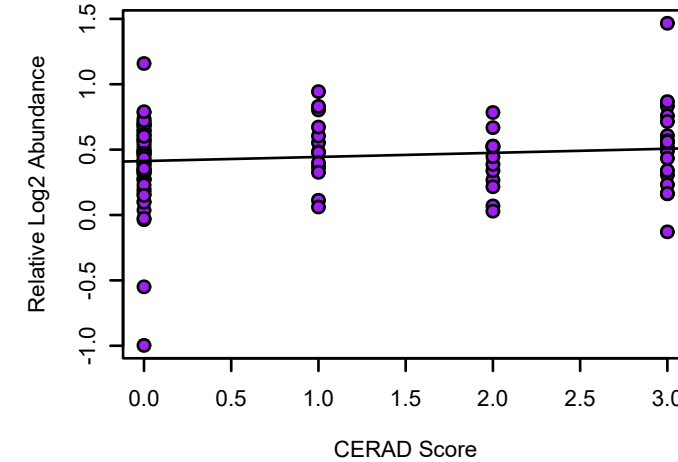

**PGM2L1 UPenn Mixed PRM**  
M1 turquoise MEGA module member  
K-W ANOVA p: 0.46

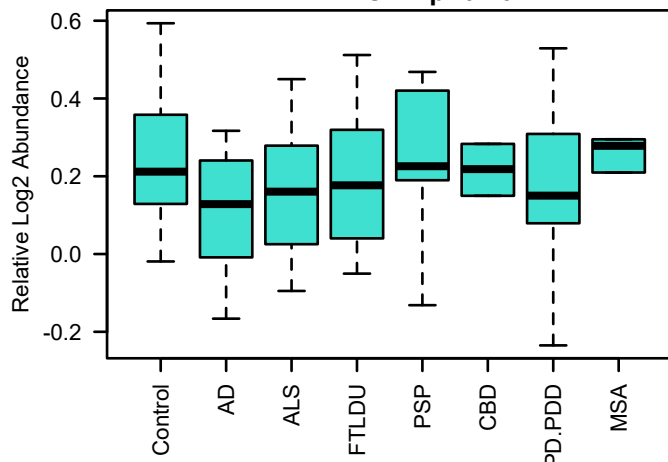

**PGM2L1 UPenn Mixed PRM**  
K-W ANOVA p: 0.097

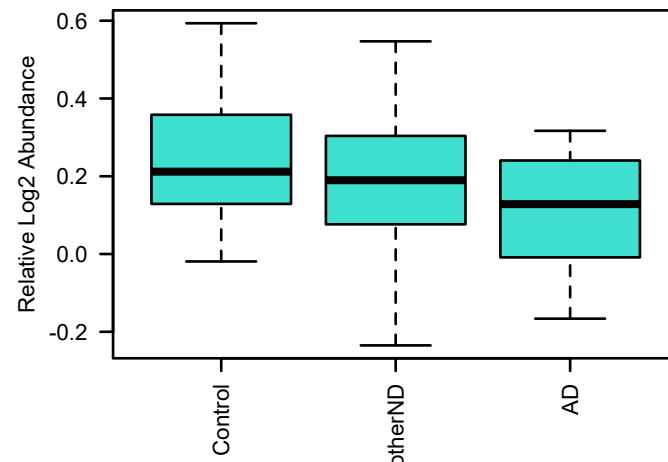

**bicor=-0.13, p=0.24**  
**cor=-0.15, p=0.17**

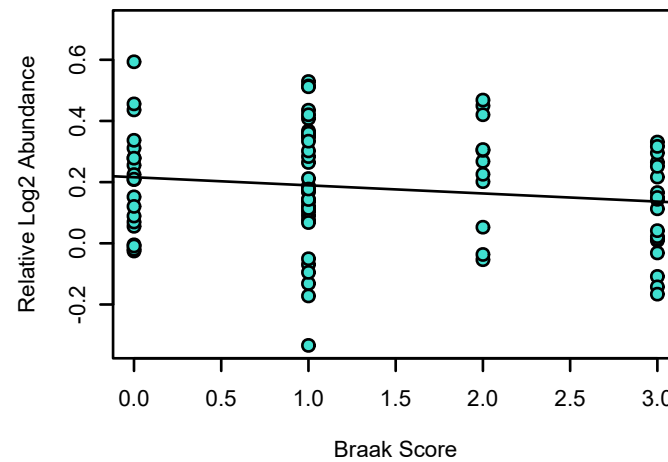

**bicor=-0.18, p=0.068**  
**cor=-0.18, p=0.073**

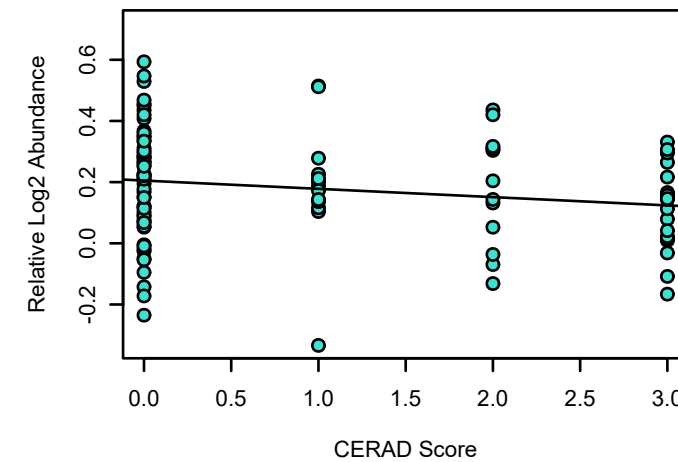

**RUFY3 UPenn Mixed PRM**  
M2 blue MEGA module member  
K-W ANOVA p: 0.0043

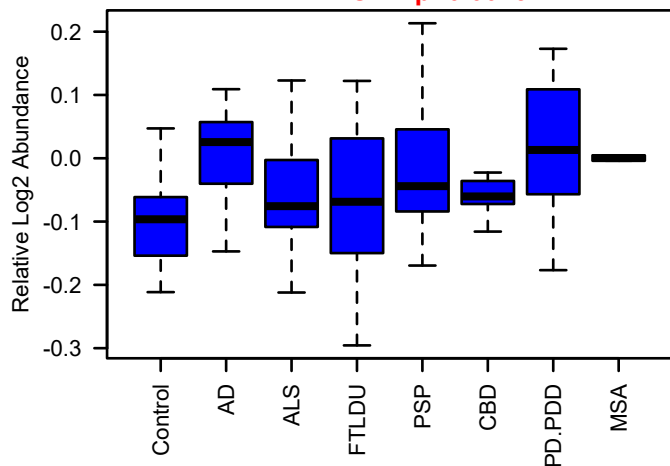

**RUFY3 UPenn Mixed PRM**  
K-W ANOVA p: 0.01

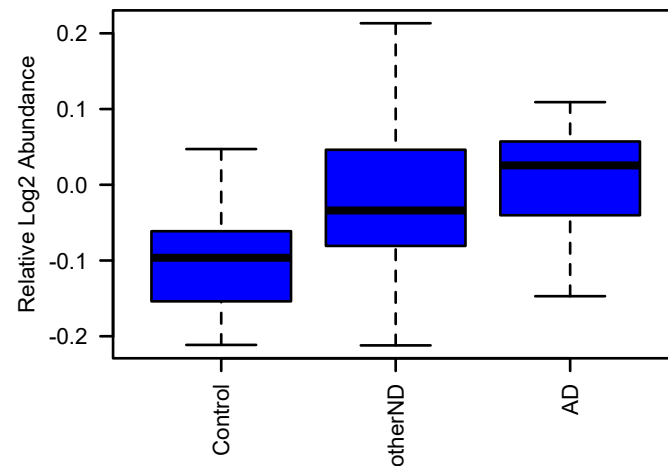

**bicor=0.24, p=0.027**  
**cor=0.21, p=0.055**

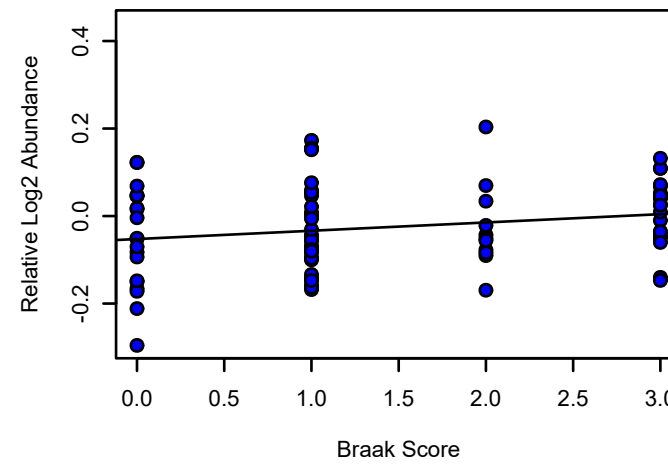

**bicor=0.21, p=0.036**  
**cor=0.19, p=0.058**

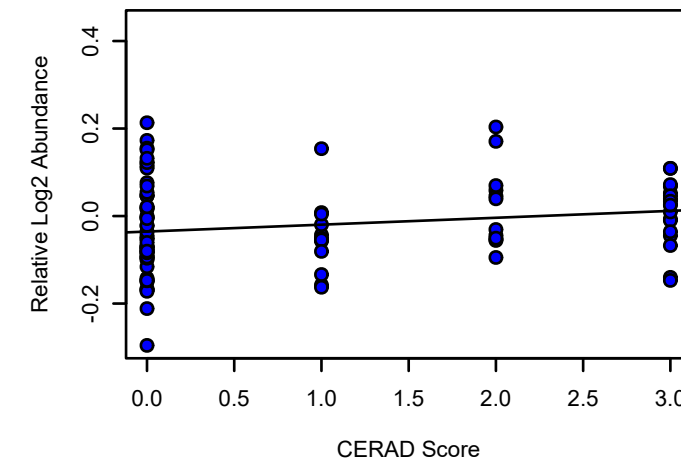

**SV2A UPenn Mixed PRM**  
M1 turquoise MEGA module member  
K-W ANOVA p: 0.98

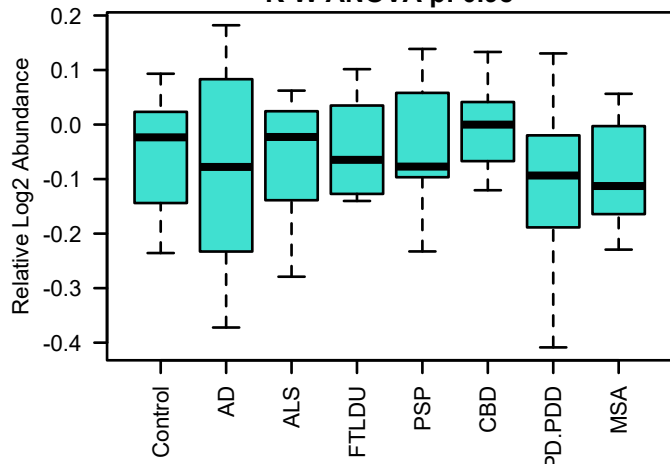

**SV2A UPenn Mixed PRM**  
K-W ANOVA p: 1

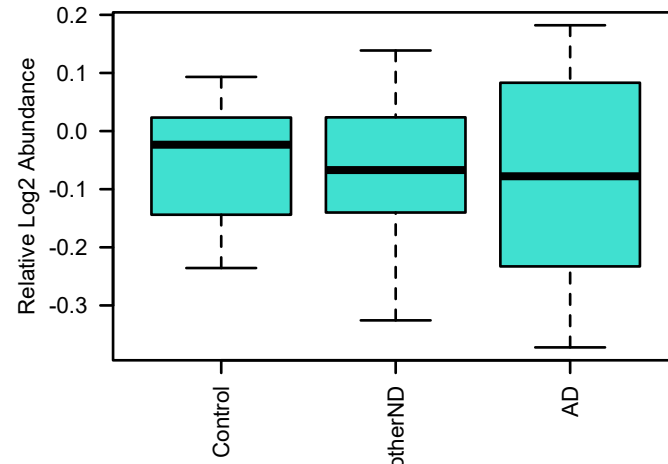

**bicor=-0.00018, p=1**  
**cor=0.026, p=0.81**

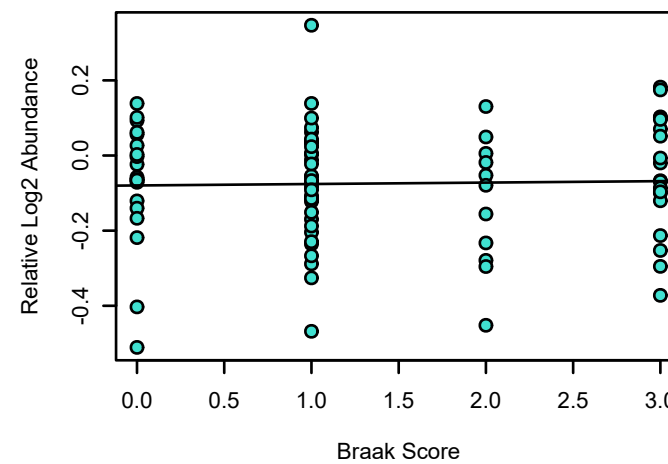

**bicor=0.01, p=0.92**  
**cor=0.0065, p=0.95**

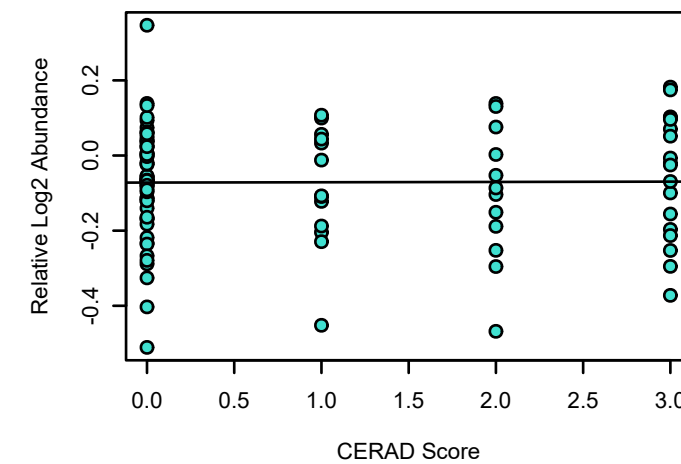

**SV2B UPenn Mixed PRM**  
M1 turquoise MEGA module member  
K-W ANOVA p: 0.0014

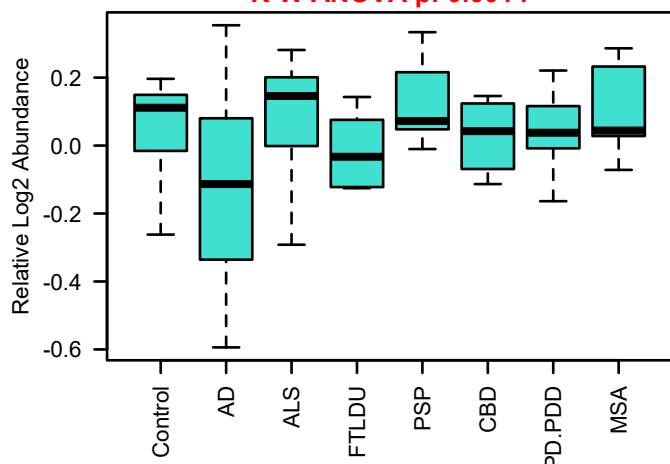

**SV2B UPenn Mixed PRM**  
K-W ANOVA p: 0.0014

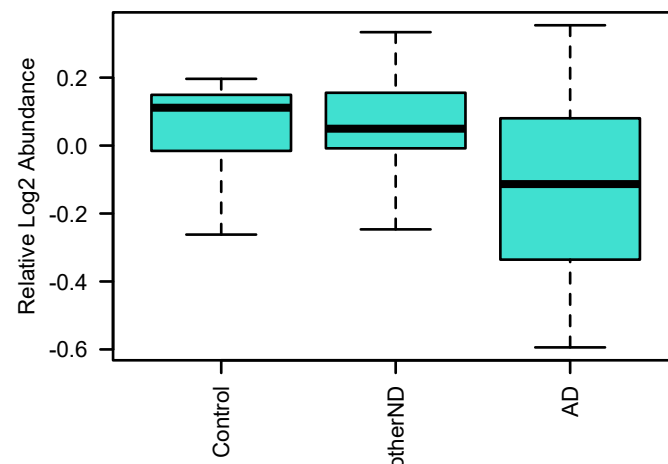

**bicor=-0.3, p=0.0056**  
**cor=-0.34, p=0.0016**

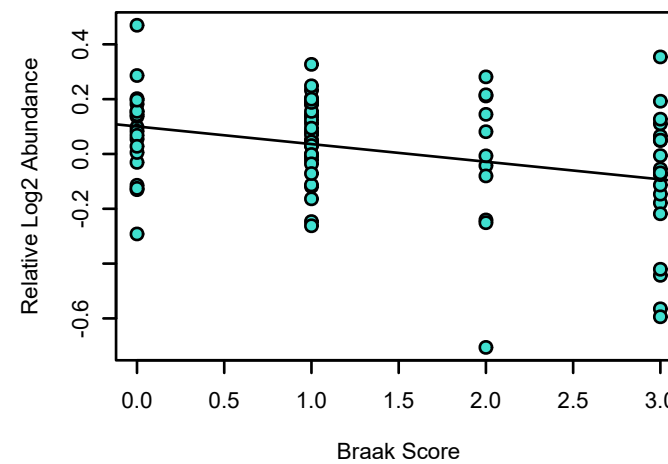

**bicor=-0.22, p=0.03**  
**cor=-0.26, p=0.009**

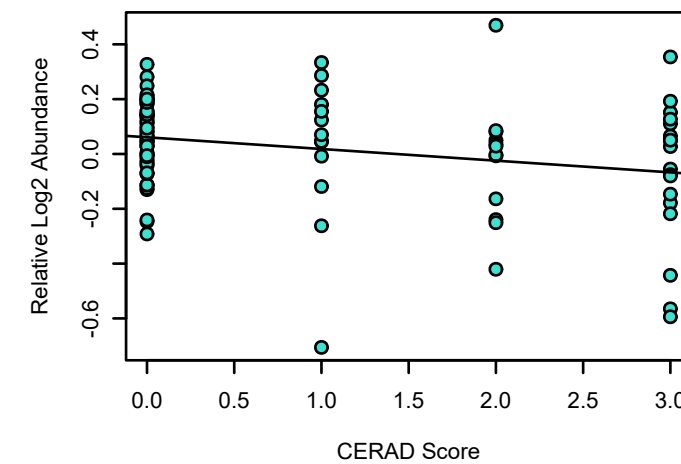

**SV2C UPenn Mixed PRM**  
NA grey20 MEGA module member  
K-W ANOVA p: 0.46

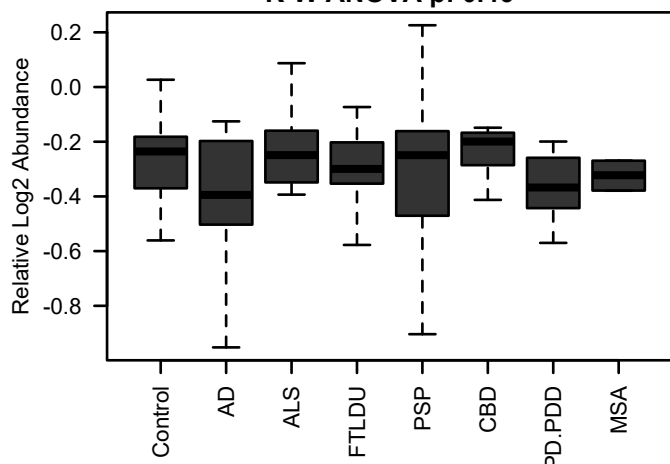

**SV2C UPenn Mixed PRM**  
K-W ANOVA p: 0.24

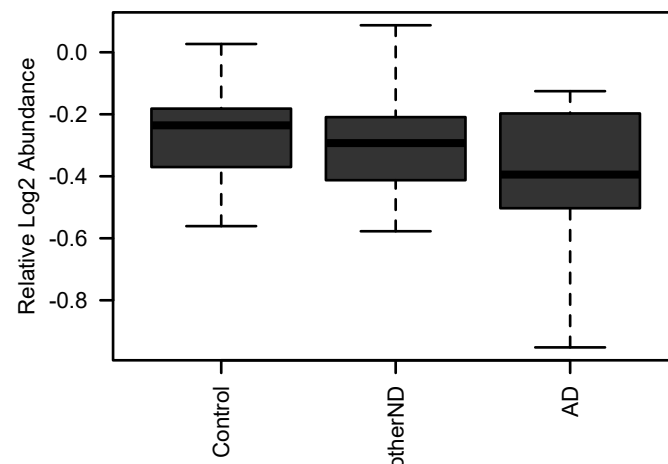

**bicor=-0.2, p=0.066**  
**cor=-0.18, p=0.1**

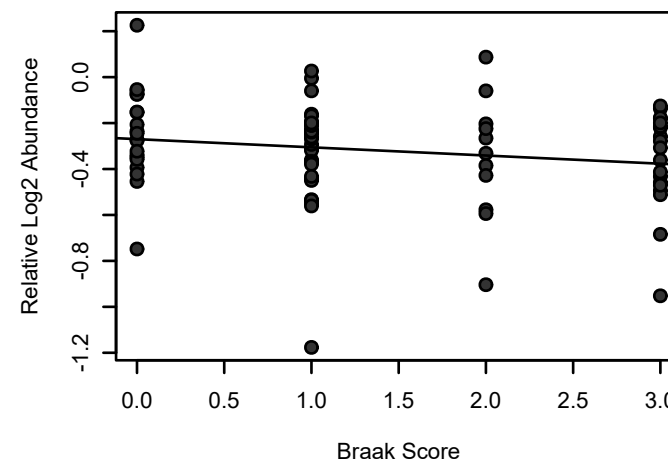

**bicor=-0.13, p=0.21**  
**cor=-0.16, p=0.11**

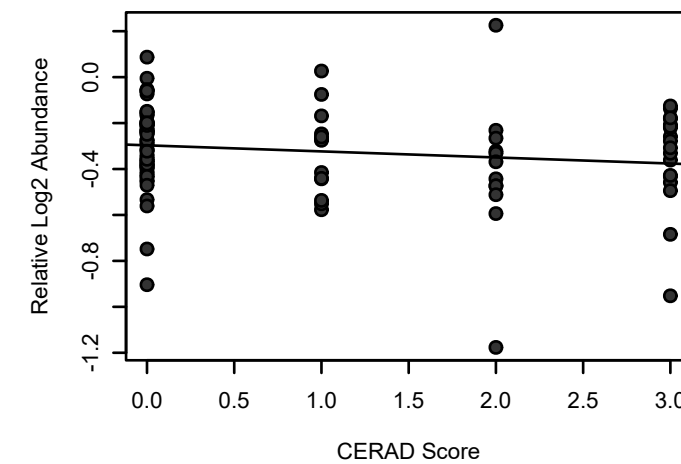

**ATCAY UPenn Mixed PRM**  
M1 turquoise MEGA module member  
K-W ANOVA p: 0.77

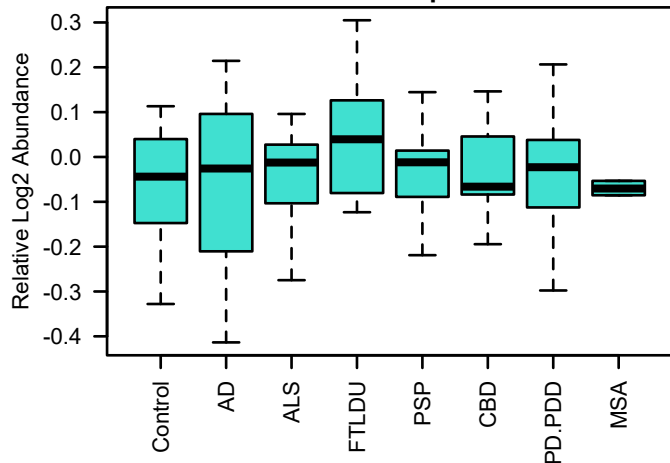

**ATCAY UPenn Mixed PRM**  
K-W ANOVA p: 0.86

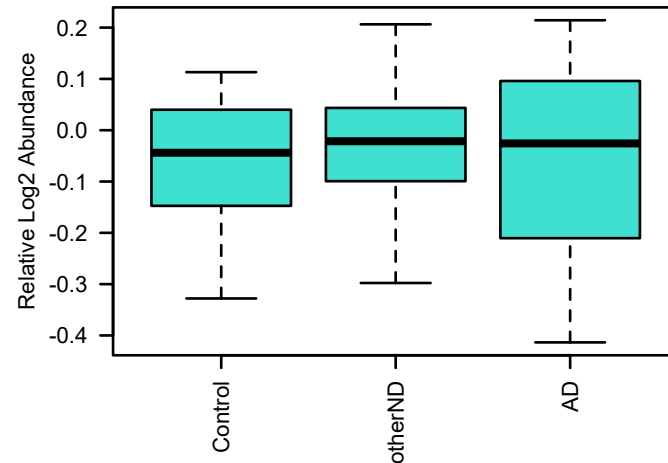

**bicor=0.01, p=0.93**  
**cor=0.047, p=0.67**

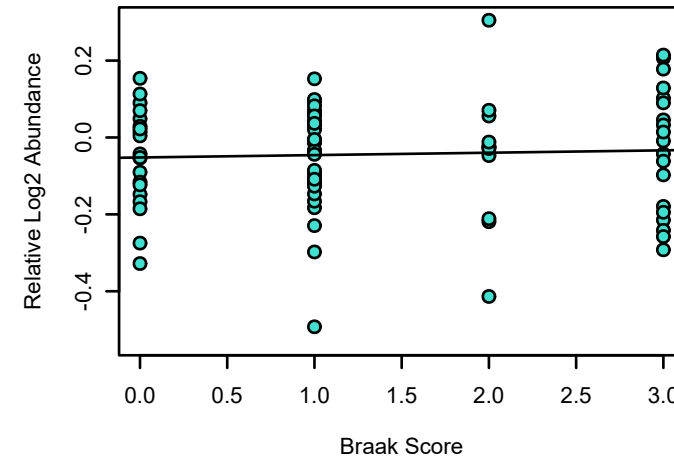

**bicor=-0.0011, p=0.99**  
**cor=-0.028, p=0.78**

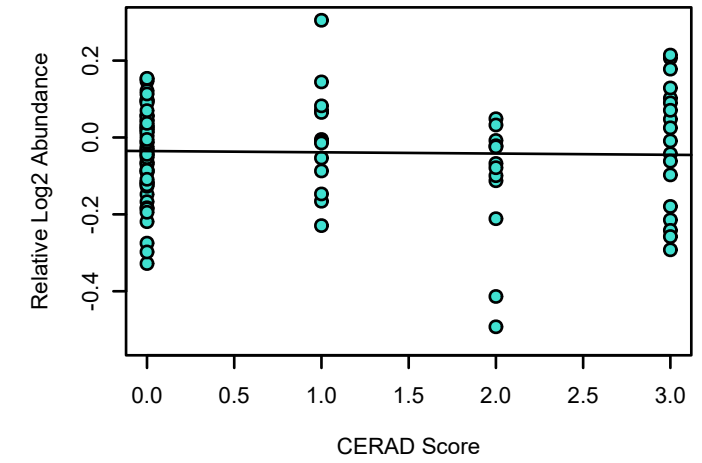

**HOMER1 UPenn Mixed PRM**  
M1 turquoise MEGA module member  
K-W ANOVA p: 0.00019

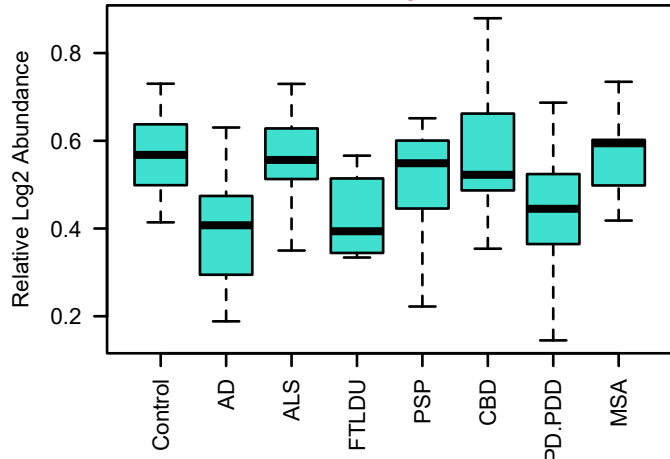

**HOMER1 UPenn Mixed PRM**  
K-W ANOVA p: 0.0038

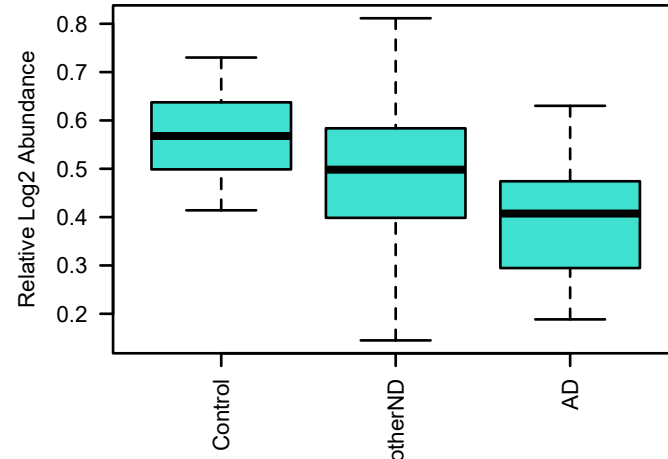

**bicor=-0.32, p=0.0026**  
**cor=-0.29, p=0.0075**

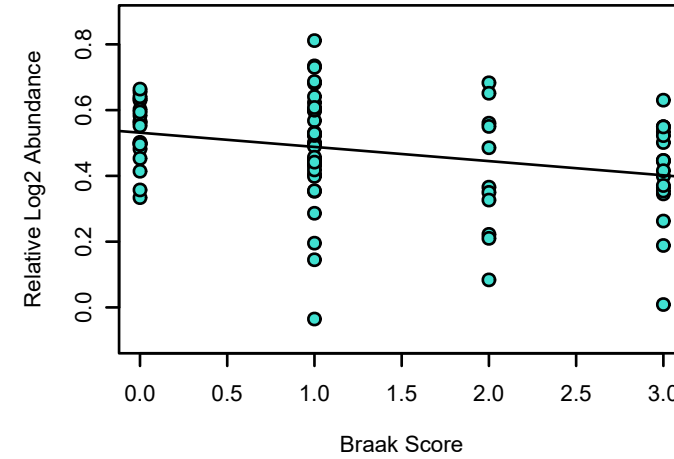

**bicor=-0.33, p=0.00082**  
**cor=-0.34, p=0.00054**

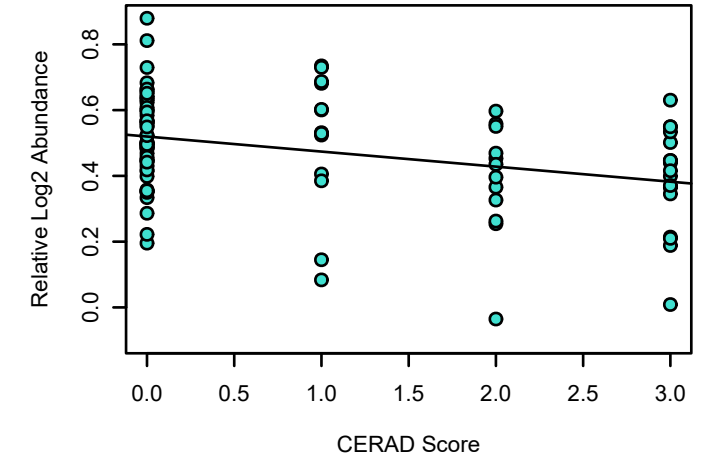

**SYT12 UPenn Mixed PRM**  
M3 brown MEGA module member  
K-W ANOVA p: 6.5e-05

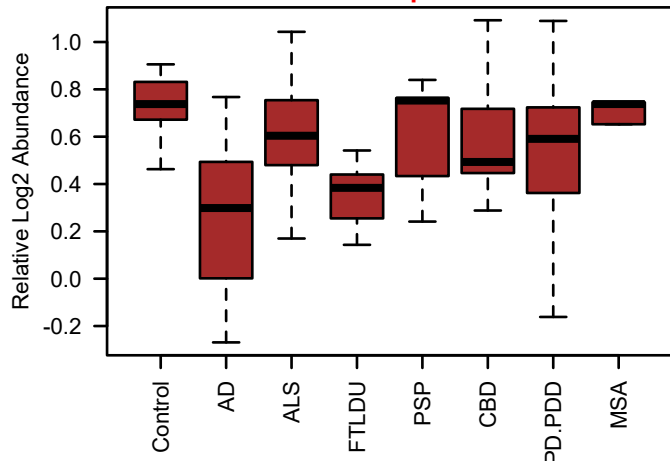

**SYT12 UPenn Mixed PRM**  
K-W ANOVA p: 7.5e-06

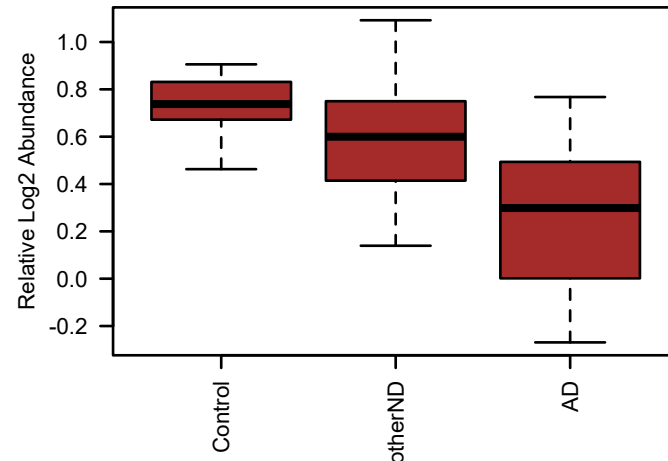

**bicor=-0.4, p=0.00016**  
**cor=-0.41, p=0.00011**

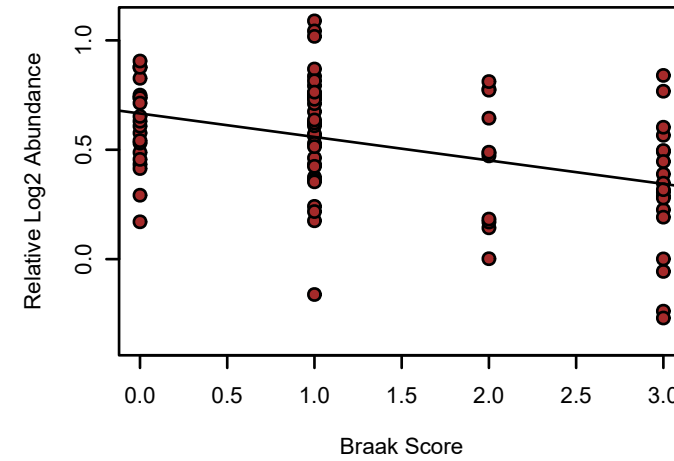

**bicor=-0.39, p=5.2e-05**  
**cor=-0.41, p=2.3e-05**

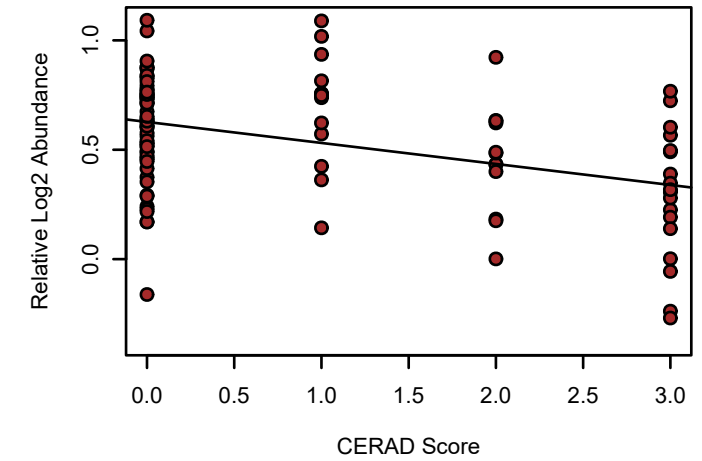

**SIRT2 UPenn Mixed PRM**  
M2 blue MEGA module member  
K-W ANOVA p: 0.093

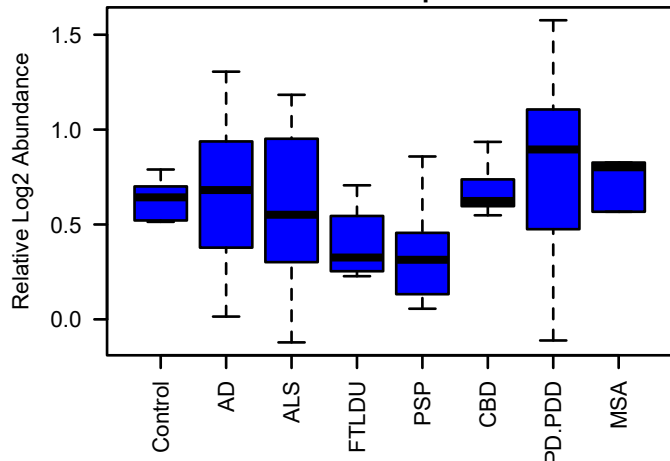

**SIRT2 UPenn Mixed PRM**  
K-W ANOVA p: 0.98

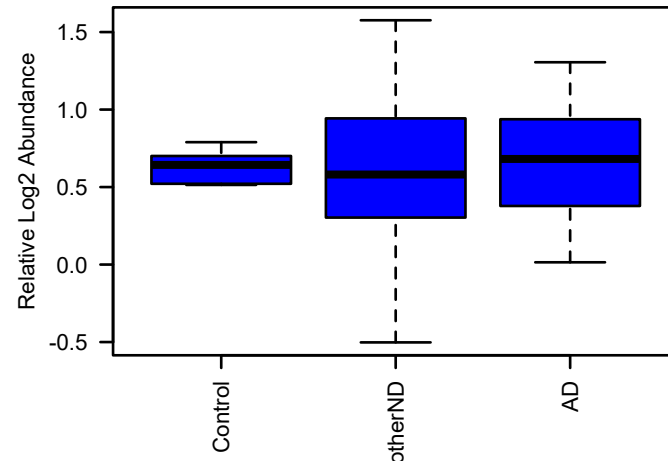

**bicor=0.091, p=0.41**  
**cor=0.086, p=0.44**

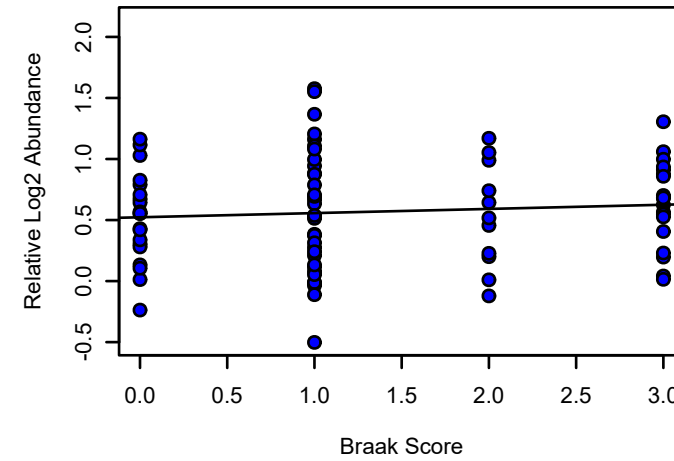

**bicor=0.028, p=0.78**  
**cor=0.03, p=0.77**

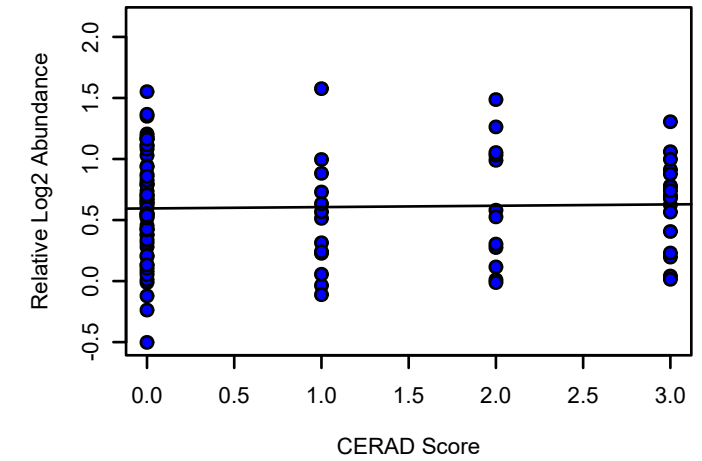

**CADM3 UPenn Mixed PRM**  
**M1 turquoise MEGA module member**  
**K-W ANOVA p: 2.7e-05**

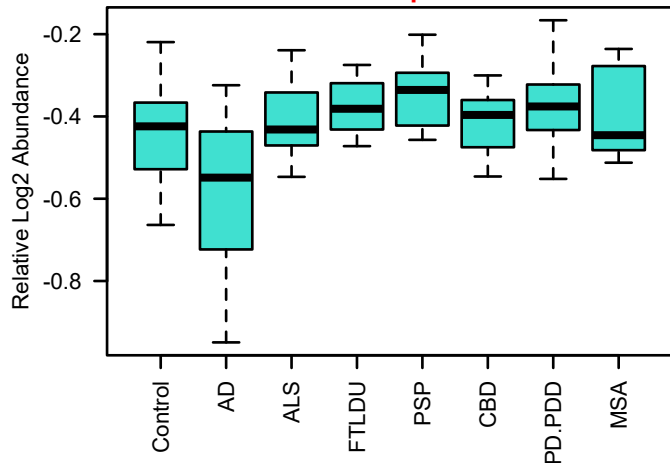

**CADM3 UPenn Mixed PRM**  
**K-W ANOVA p: 1.9e-07**

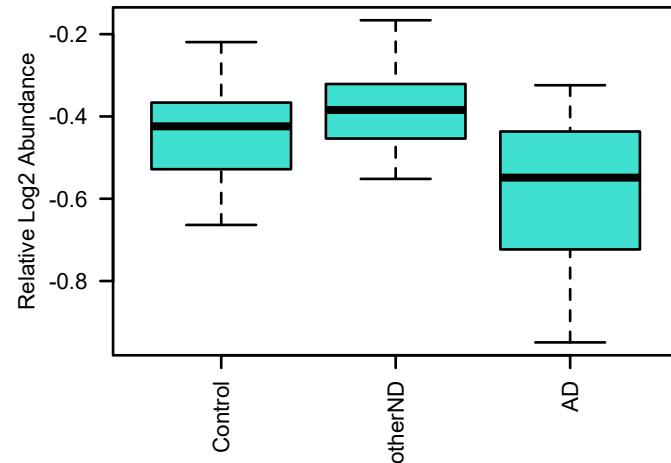

**bicor=-0.34, p=0.0014**  
**cor=-0.38, p=0.00036**

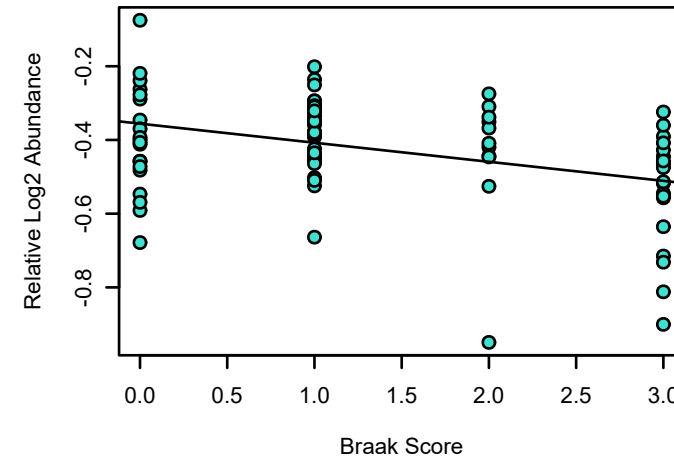

**bicor=-0.23, p=0.021**  
**cor=-0.27, p=0.0066**

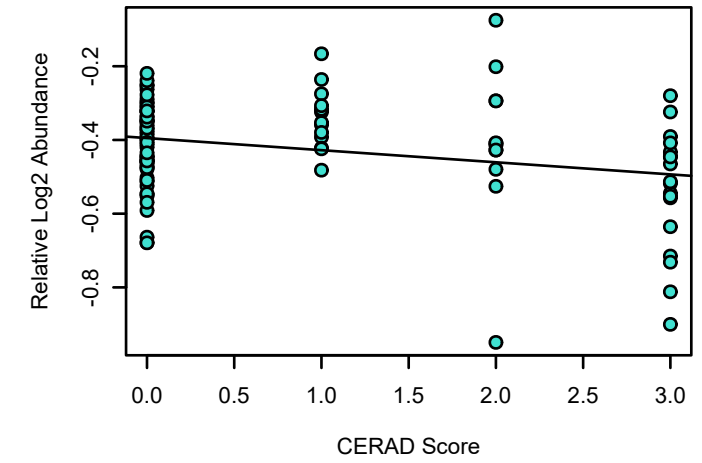

**SYNPO UPenn Mixed PRM**  
**M6 red MEGA module member**  
**K-W ANOVA p: 2.7e-09**

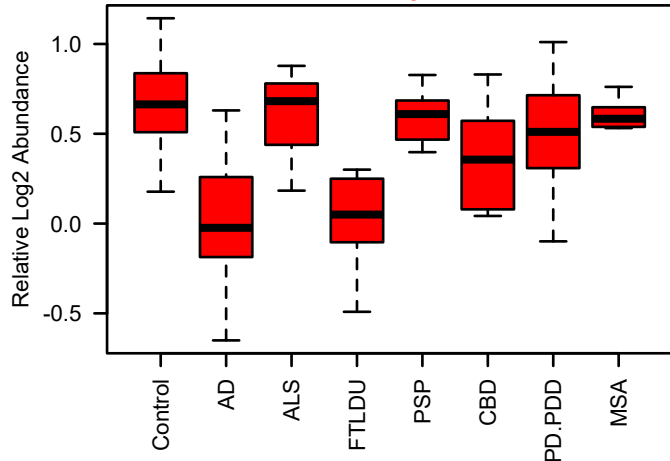

**SYNPO UPenn Mixed PRM**  
**K-W ANOVA p: 5.9e-08**

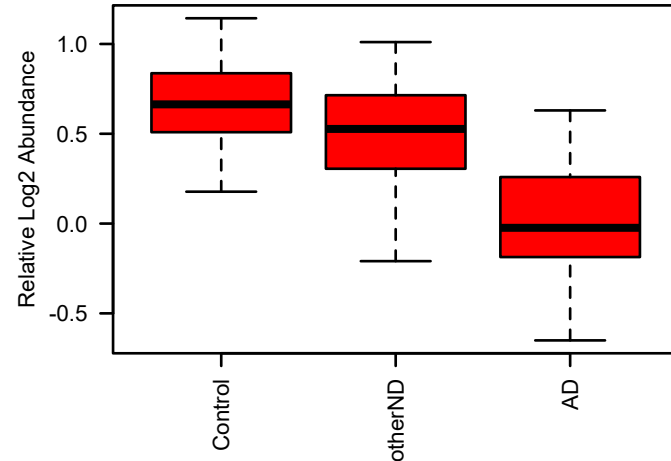

**bicor=-0.39, p=0.00027**  
**cor=-0.4, p=0.00016**

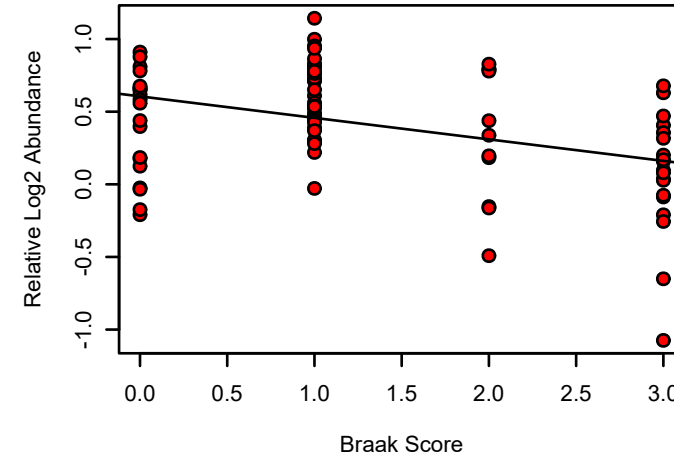

**bicor=-0.4, p=3.9e-05**  
**cor=-0.42, p=1.4e-05**

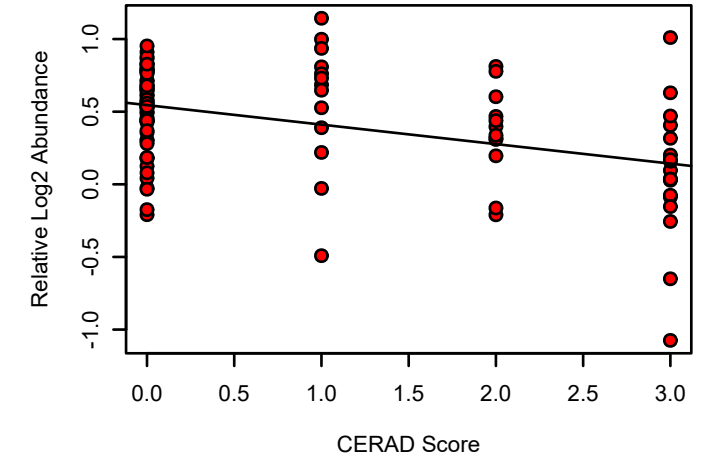

**DPP10 UPenn Mixed PRM**  
**M1 turquoise MEGA module member**  
**K-W ANOVA p: 0.46**

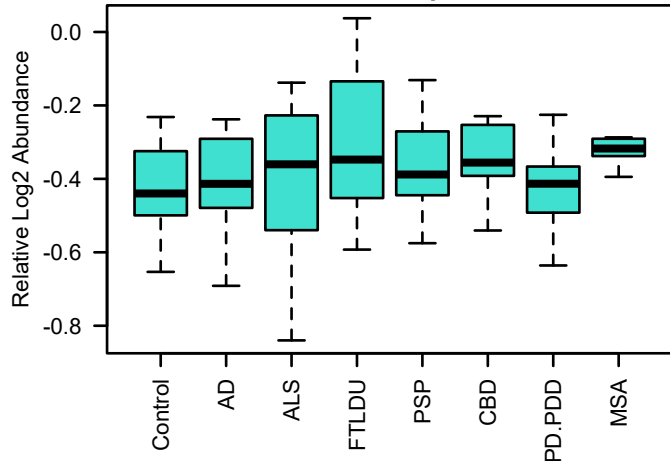

**DPP10 UPenn Mixed PRM**  
**K-W ANOVA p: 0.62**

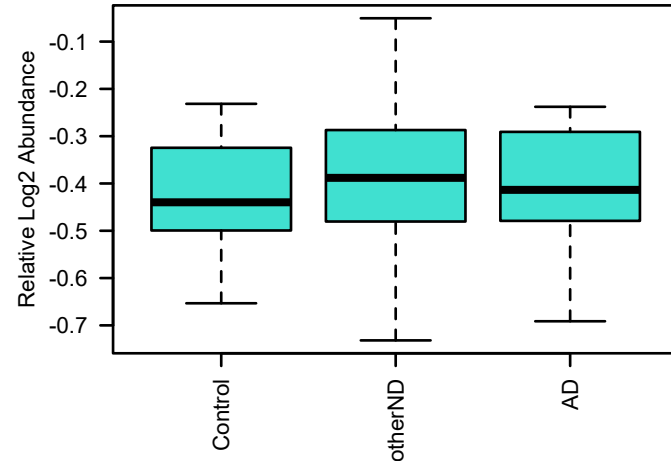

**bicor=-8.1e-05, p=1**  
**cor=0.013, p=0.91**

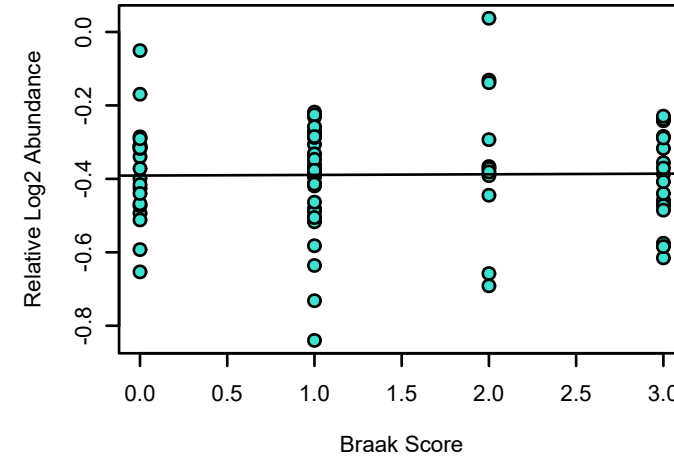

**bicor=-0.063, p=0.53**  
**cor=-0.048, p=0.64**

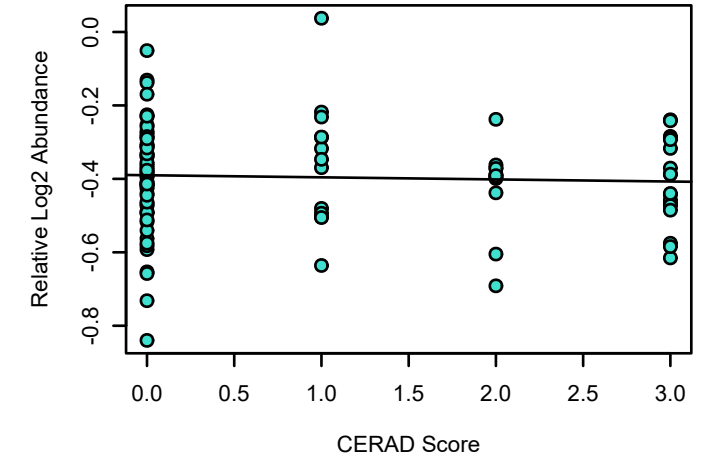

**ERMN UPenn Mixed PRM**  
**M2 blue MEGA module member**  
**K-W ANOVA p: 0.025**

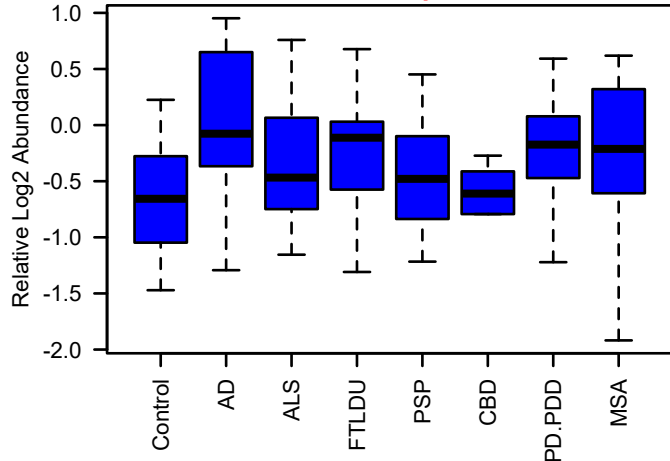

**ERMN UPenn Mixed PRM**  
**K-W ANOVA p: 0.0098**

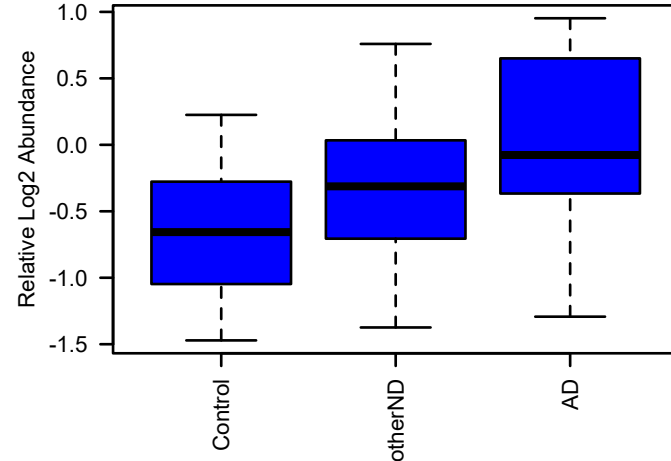

**bicor=0.25, p=0.024**  
**cor=0.26, p=0.017**

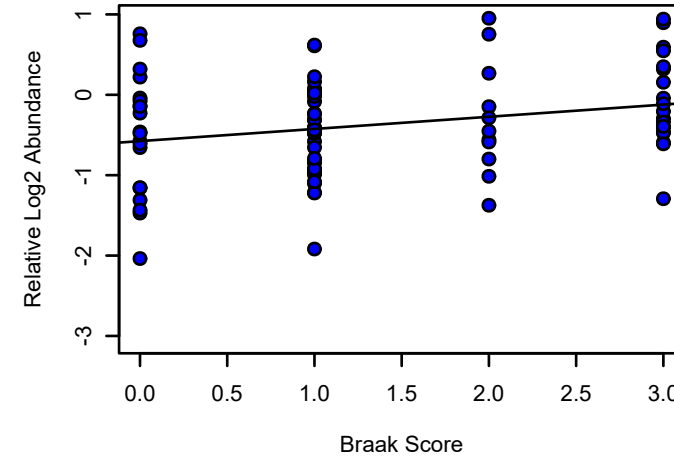

**bicor=0.19, p=0.057**  
**cor=0.19, p=0.058**

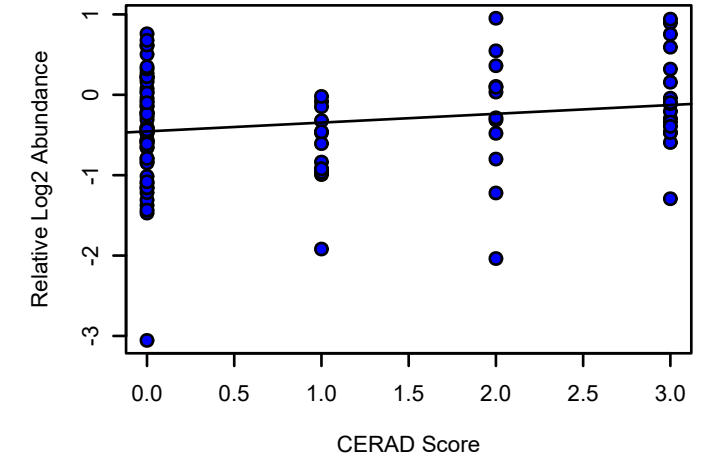

**DMXL2 UPenn Mixed PRM**  
M1 turquoise MEGA module member  
K-W ANOVA p: 0.00099

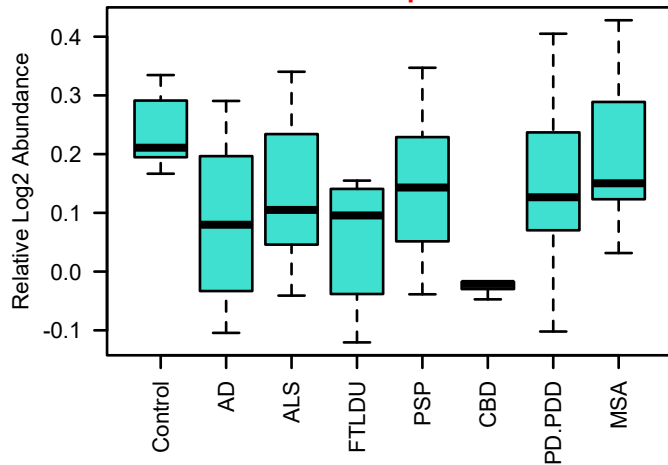

**DMXL2 UPenn Mixed PRM**  
K-W ANOVA p: 0.0023

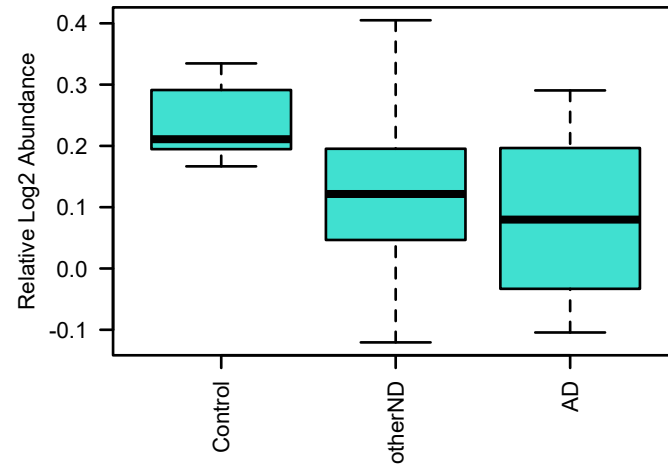

**bicor=-0.34, p=0.0017**  
**cor=-0.3, p=0.0056**

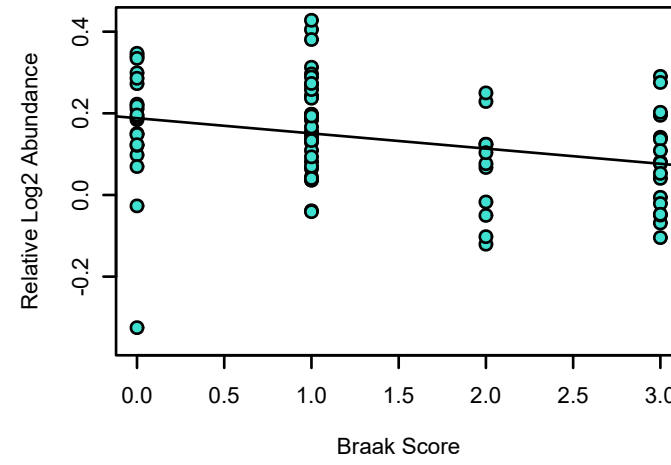

**bicor=-0.083, p=0.41**  
**cor=-0.069, p=0.5**

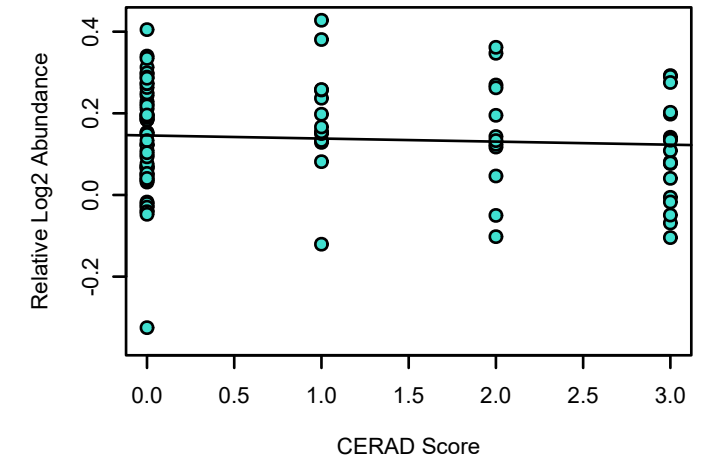

**PDCD6IP UPenn Mixed PRM**  
NA grey MEGA module member  
K-W ANOVA p: 0.0078

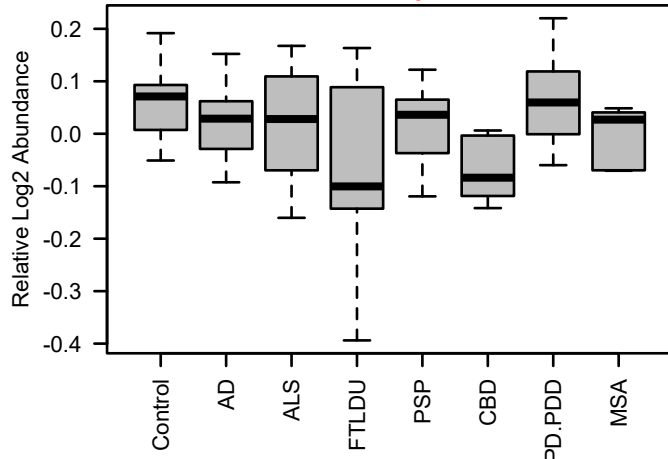

**PDCD6IP UPenn Mixed PRM**  
K-W ANOVA p: 0.6

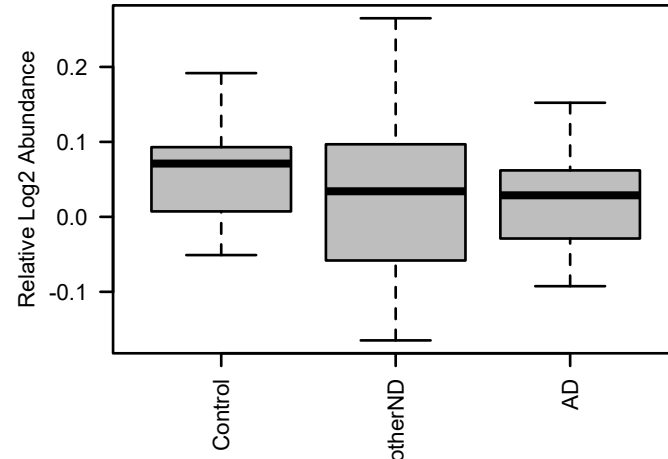

**bicor=-0.16, p=0.14**  
**cor=-0.14, p=0.2**

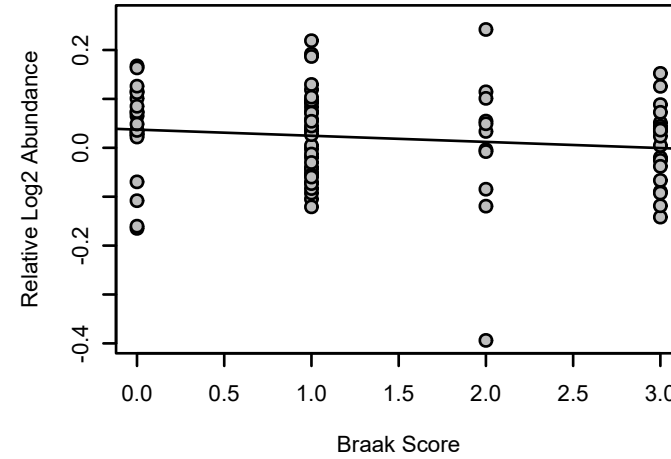

**bicor=0.022, p=0.83**  
**cor=0.029, p=0.77**

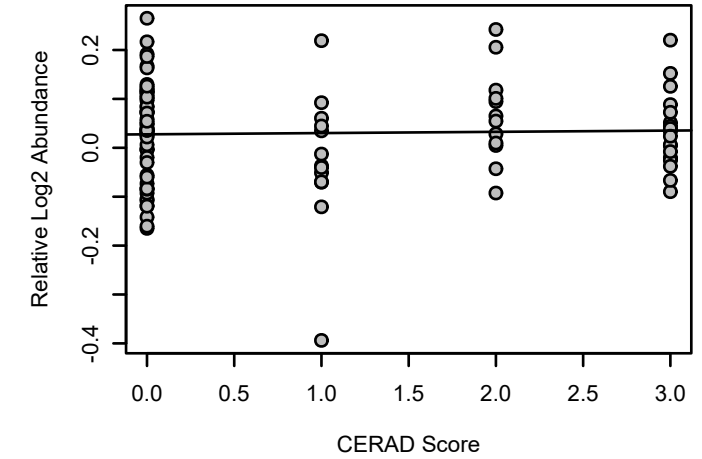

**CASKIN1 UPenn Mixed PRM**  
M1 turquoise MEGA module member  
K-W ANOVA p: 2.9e-06

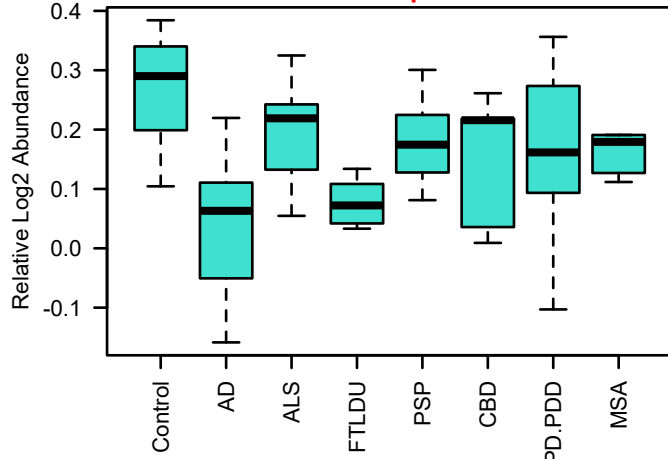

**CASKIN1 UPenn Mixed PRM**  
K-W ANOVA p: 3.1e-07

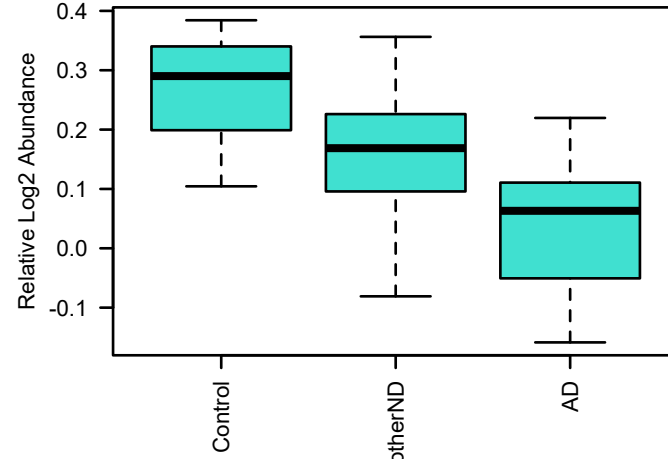

**bicor=-0.48, p=4e-06**  
**cor=-0.51, p=7.2e-07**

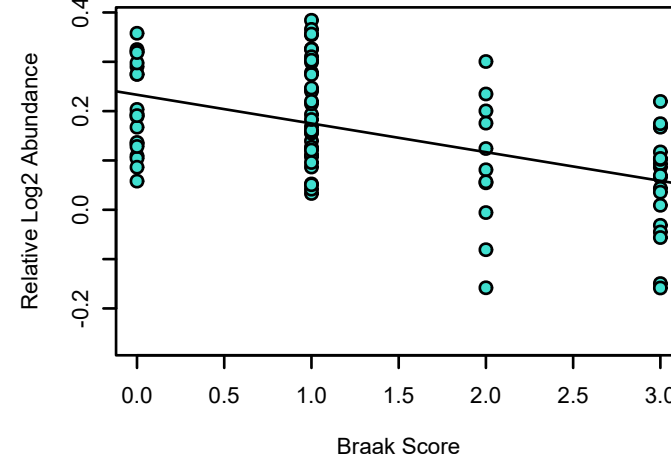

**bicor=-0.42, p=1.1e-05**  
**cor=-0.44, p=4.6e-06**

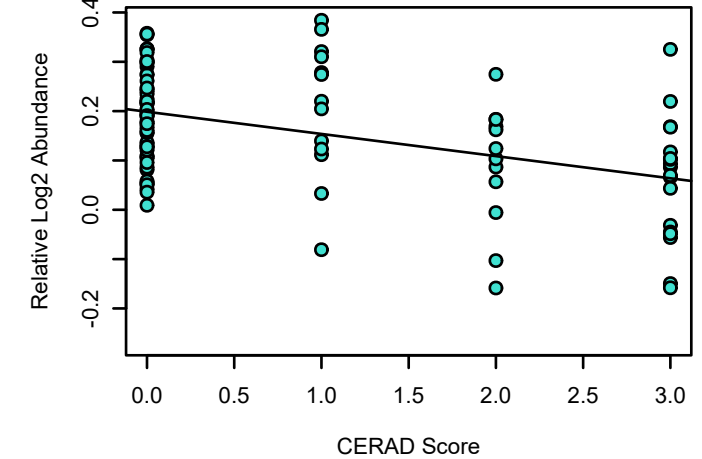

**ATL1 UPenn Mixed PRM**  
M1 turquoise MEGA module member  
K-W ANOVA p: 0.16

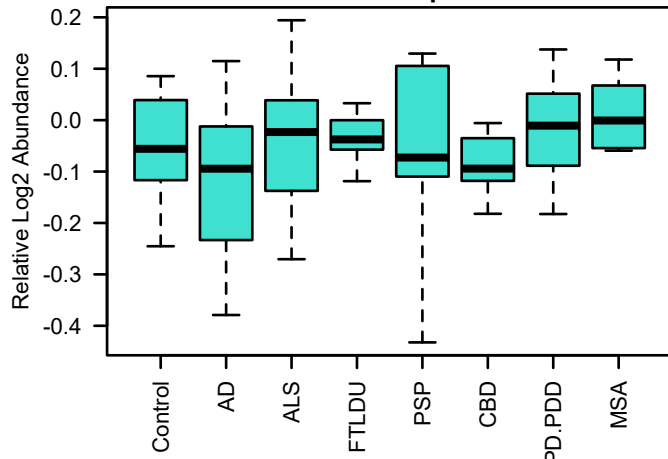

**ATL1 UPenn Mixed PRM**  
K-W ANOVA p: 0.049

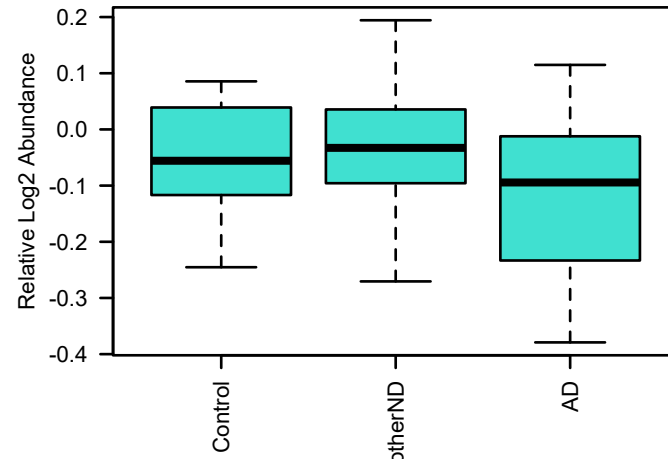

**bicor=-0.15, p=0.18**  
**cor=-0.15, p=0.17**

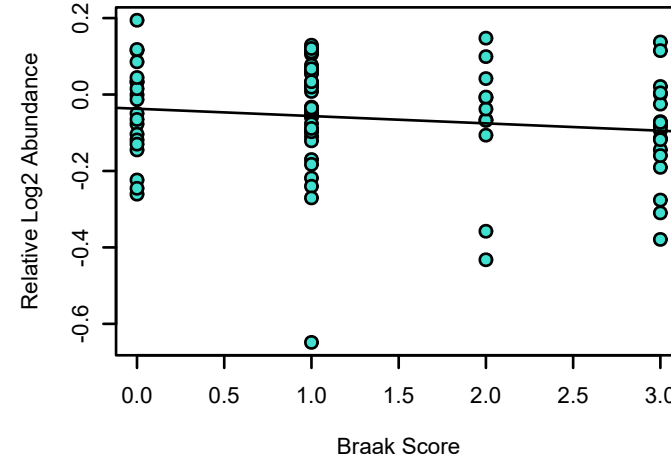

**bicor=-0.092, p=0.36**  
**cor=-0.13, p=0.2**

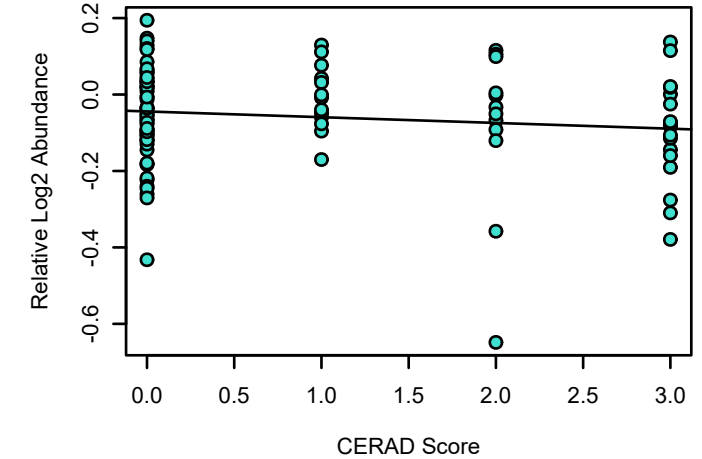

**MADD UPenn Mixed PRM**  
M1 turquoise MEGA module member  
K-W ANOVA p: 0.53

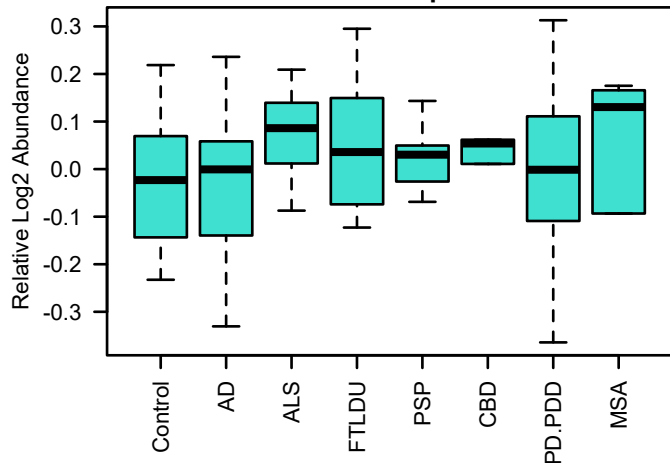

**MADD UPenn Mixed PRM**  
K-W ANOVA p: 0.38

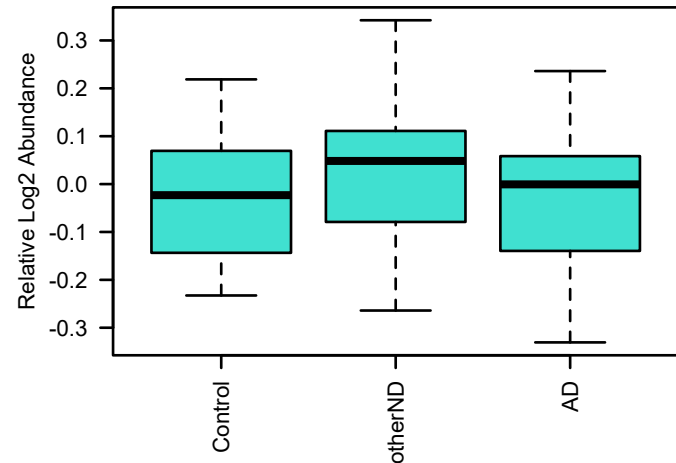

**bicor=-0.18, p=0.11**  
**cor=-0.18, p=0.1**

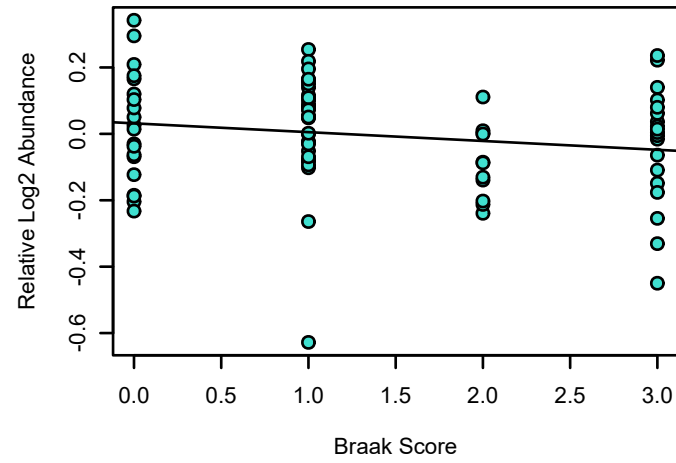

**bicor=-0.086, p=0.39**  
**cor=-0.1, p=0.32**

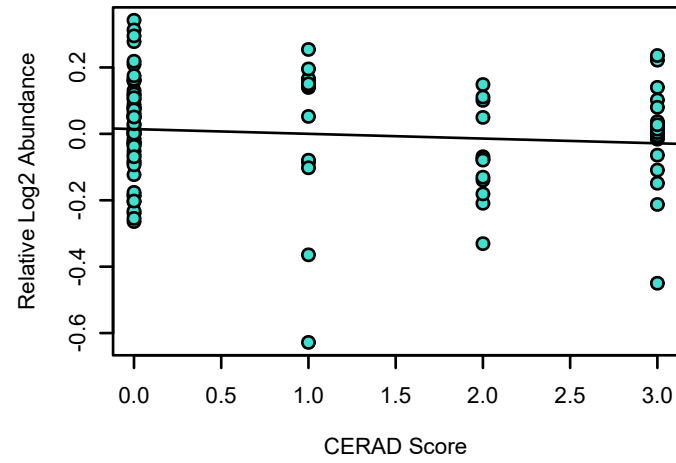

**HSPH1 UPenn Mixed PRM**  
M11 greenyellow MEGA module member  
K-W ANOVA p: 0.58

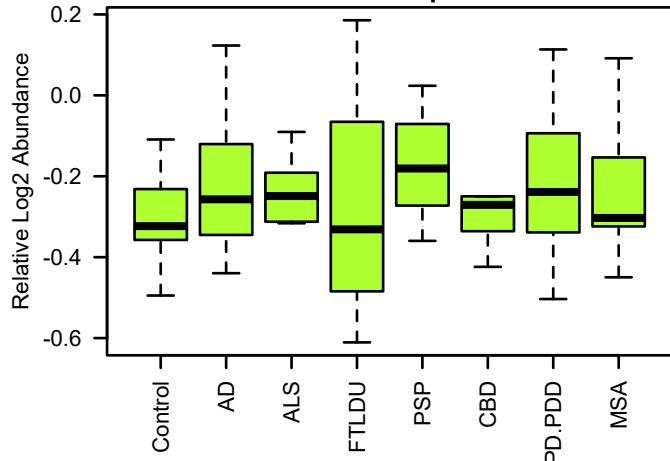

**HSPH1 UPenn Mixed PRM**  
K-W ANOVA p: 0.37

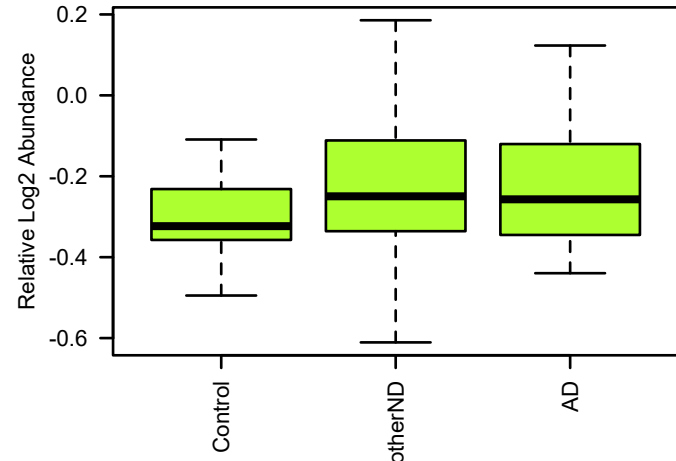

**bicor=0.18, p=0.093**  
**cor=0.13, p=0.24**

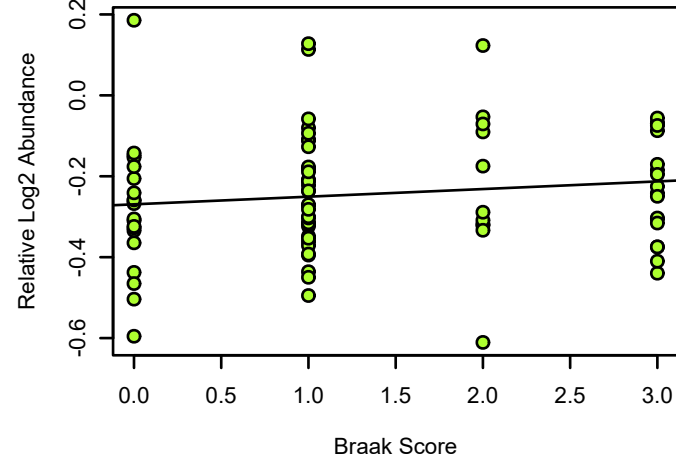

**bicor=-0.028, p=0.78**  
**cor=-0.039, p=0.7**

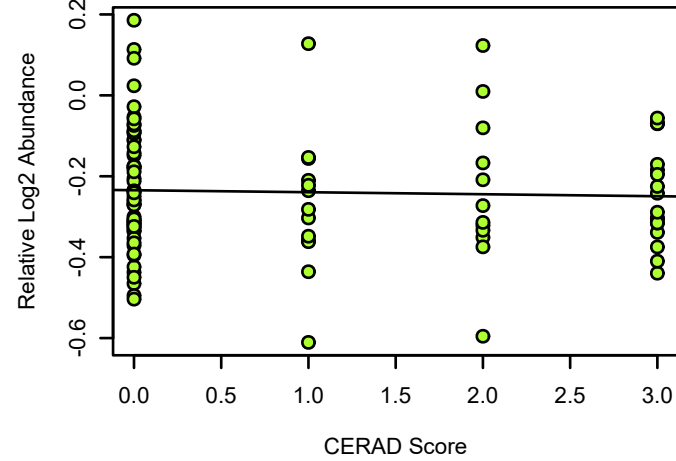

**ATP6V0A1 UPenn Mixed PRM**  
M1 turquoise MEGA module member  
K-W ANOVA p: 0.033

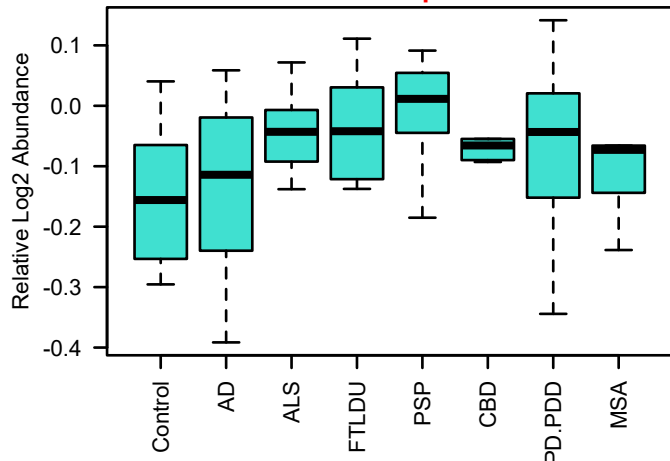

**ATP6V0A1 UPenn Mixed PRM**  
K-W ANOVA p: 0.0012

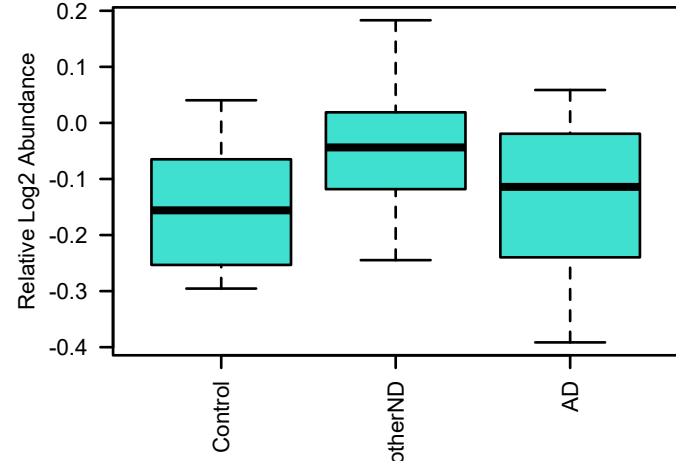

**bicor=-0.11, p=0.33**  
**cor=-0.088, p=0.43**

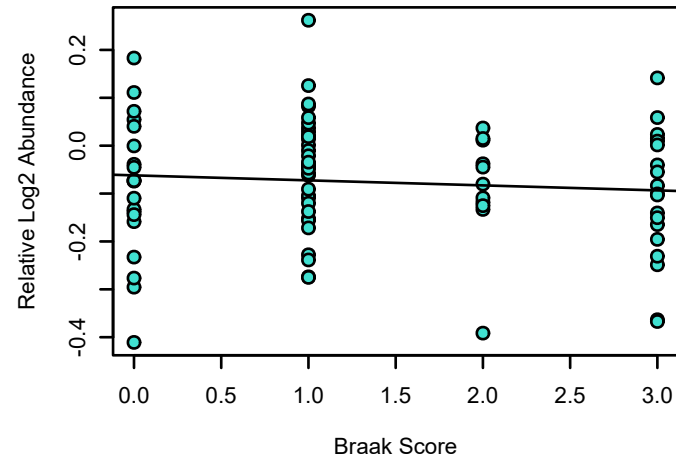

**bicor=-0.099, p=0.33**  
**cor=-0.11, p=0.28**

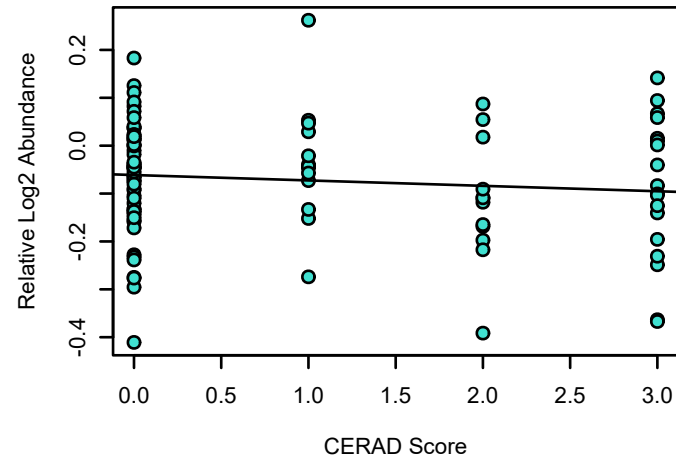

**PDXP UPenn Mixed PRM**  
M1 turquoise MEGA module member  
K-W ANOVA p: 0.14

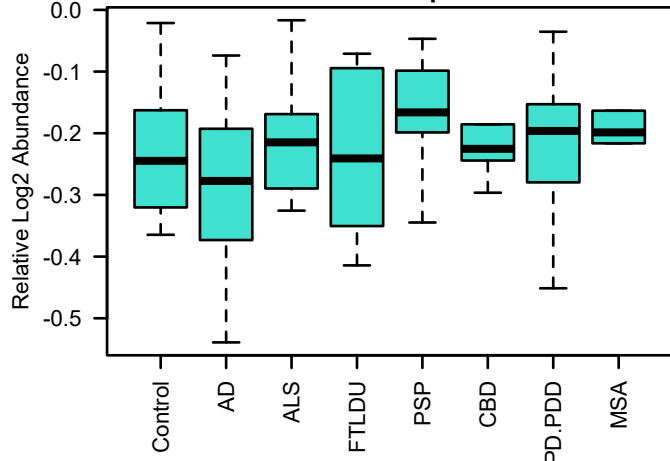

**PDXP UPenn Mixed PRM**  
K-W ANOVA p: 0.021

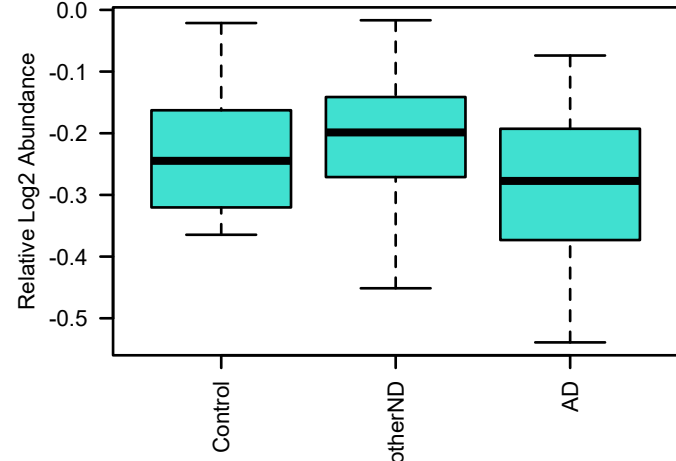

**bicor=-0.11, p=0.32**  
**cor=-0.12, p=0.28**

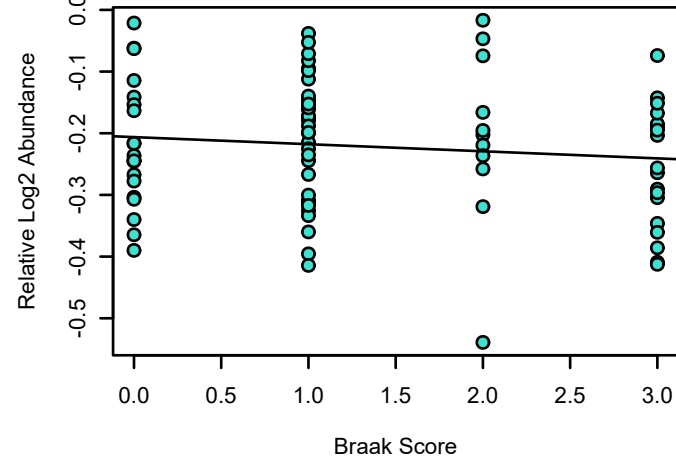

**bicor=-0.14, p=0.17**  
**cor=-0.16, p=0.11**

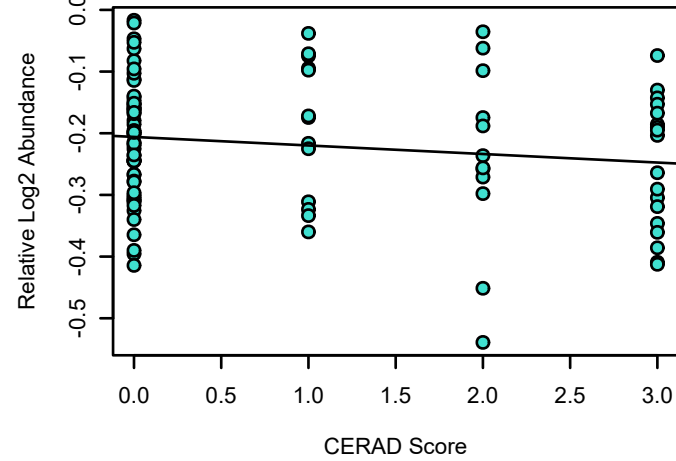

**CNDP2 UPenn Mixed PRM**  
M2 blue MEGA module member  
K-W ANOVA p: 8e-05

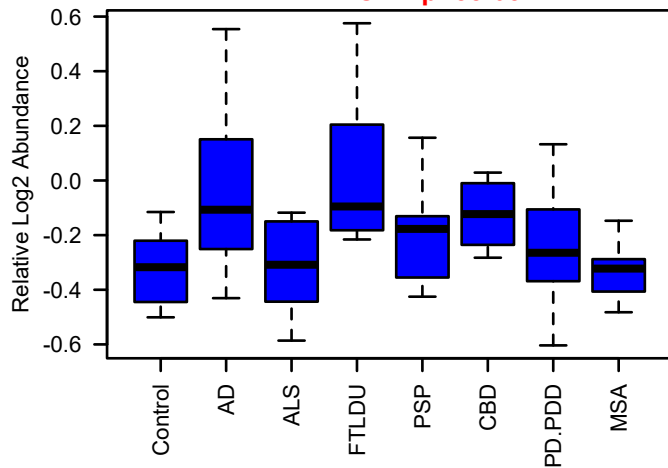

**CNDP2 UPenn Mixed PRM**  
K-W ANOVA p: 0.00022

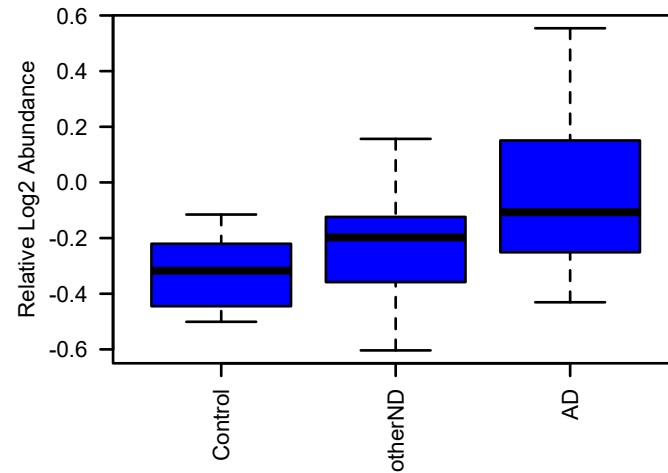

**bicor=0.28, p=0.011**  
**cor=0.35, p=0.0011**

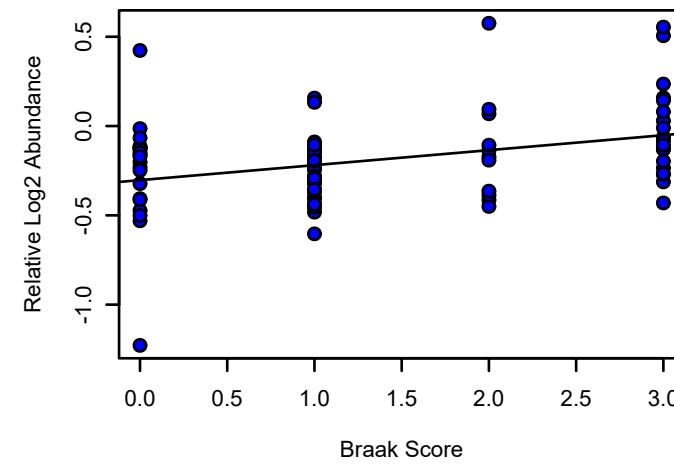

**bicor=0.21, p=0.034**  
**cor=0.26, p=0.009**

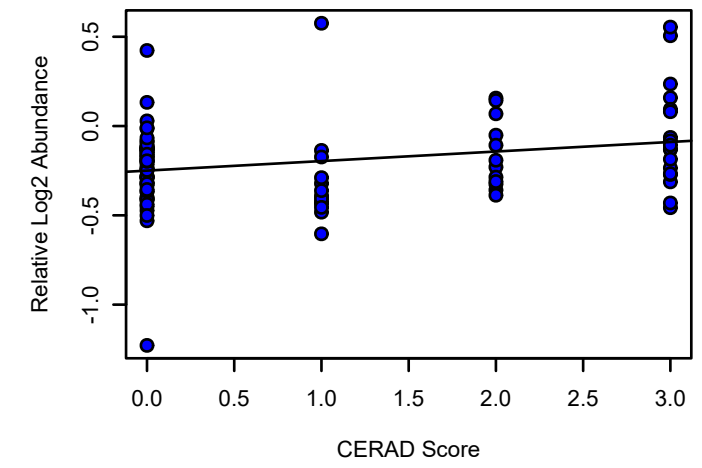

**SCN2A UPenn Mixed PRM**  
M1 turquoise MEGA module member  
K-W ANOVA p: 0.0014

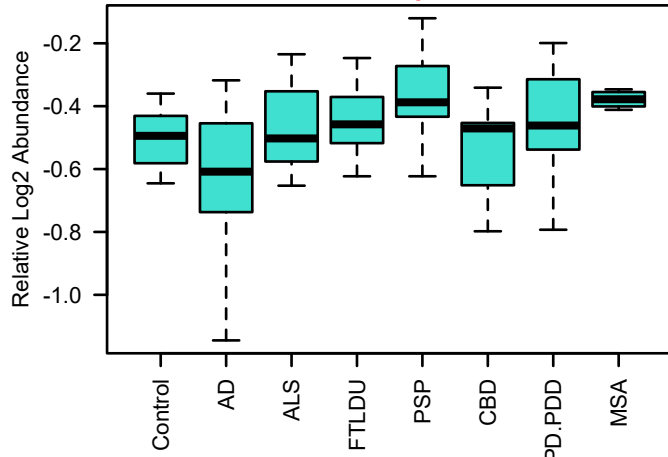

**SCN2A UPenn Mixed PRM**  
K-W ANOVA p: 0.00014

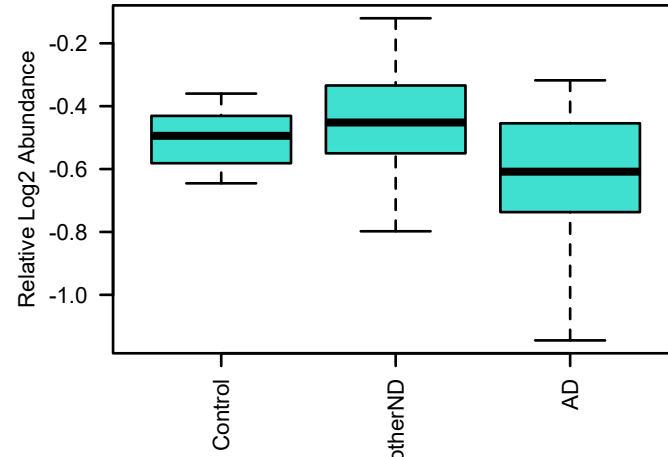

**bicor=-0.27, p=0.012**  
**cor=-0.31, p=0.0041**

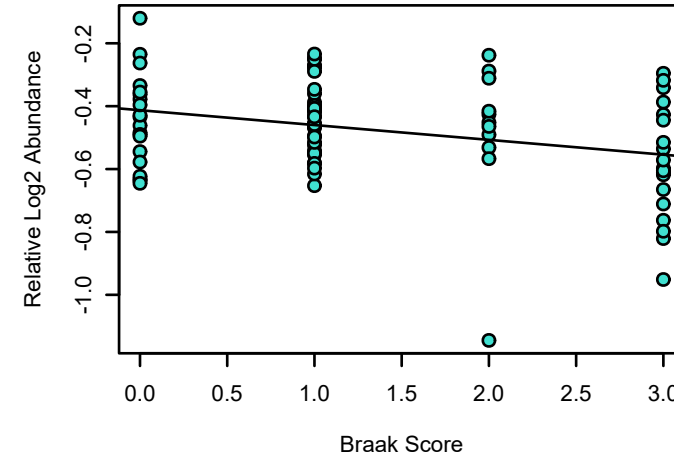

**bicor=-0.13, p=0.2**  
**cor=-0.16, p=0.11**

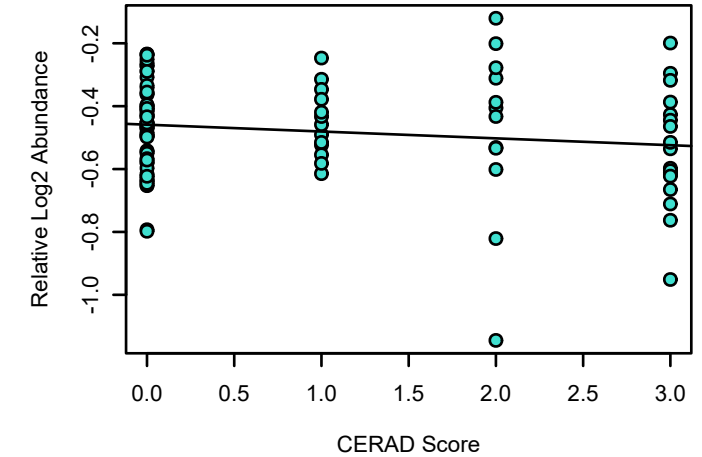

**MGLL UPenn Mixed PRM**  
M1 turquoise MEGA module member  
K-W ANOVA p: 5.4e-05

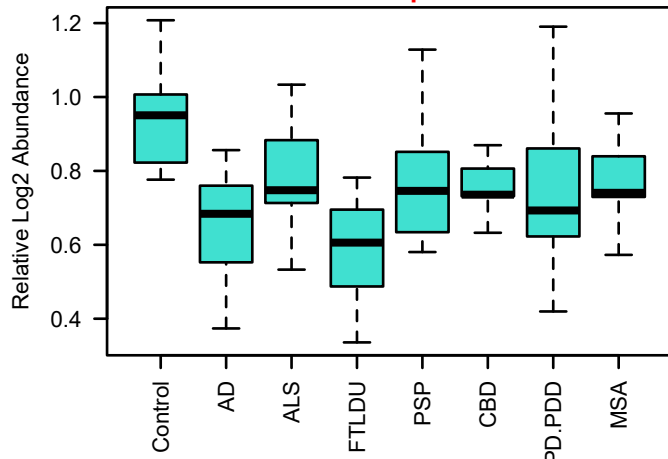

**MGLL UPenn Mixed PRM**  
K-W ANOVA p: 1.7e-05

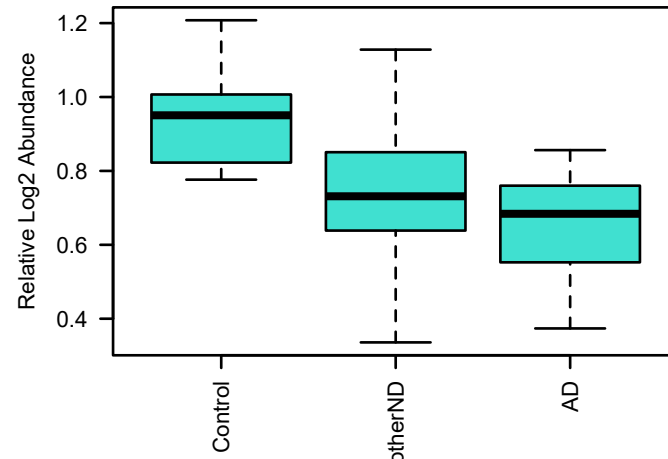

**bicor=-0.28, p=0.0091**  
**cor=-0.3, p=0.0056**

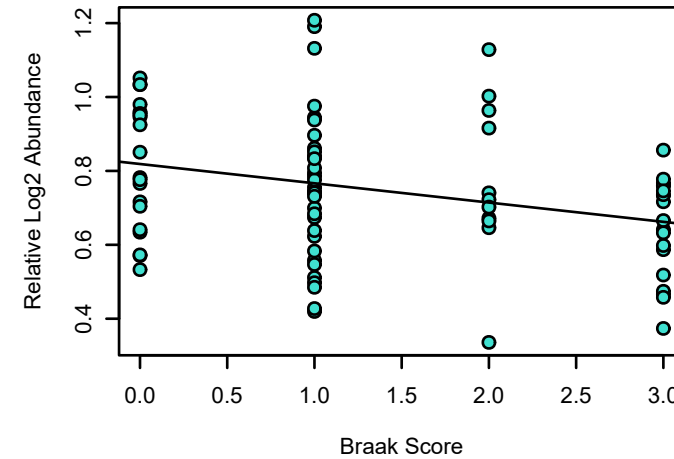

**bicor=-0.26, p=0.0092**  
**cor=-0.26, p=0.009**

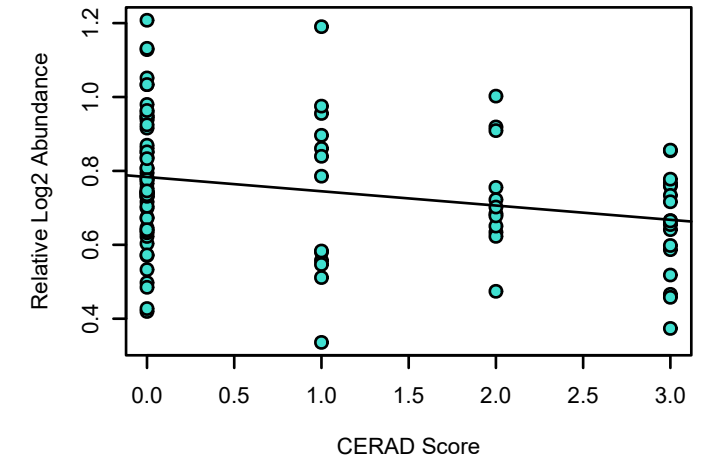

**SLC30A3 UPenn Mixed PRM**  
M1 turquoise MEGA module member  
K-W ANOVA p: 6e-06

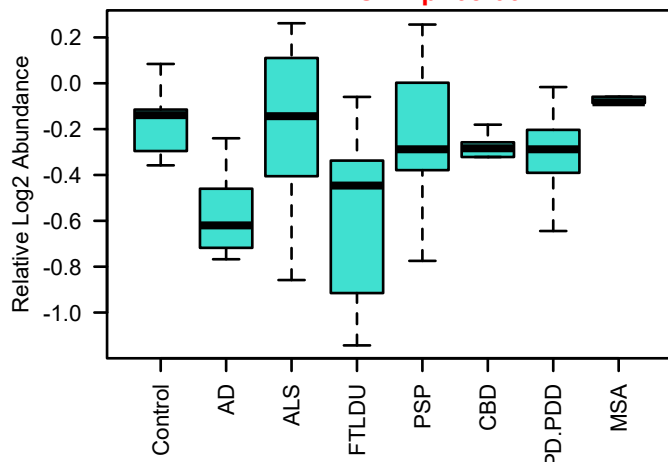

**SLC30A3 UPenn Mixed PRM**  
K-W ANOVA p: 1.7e-05

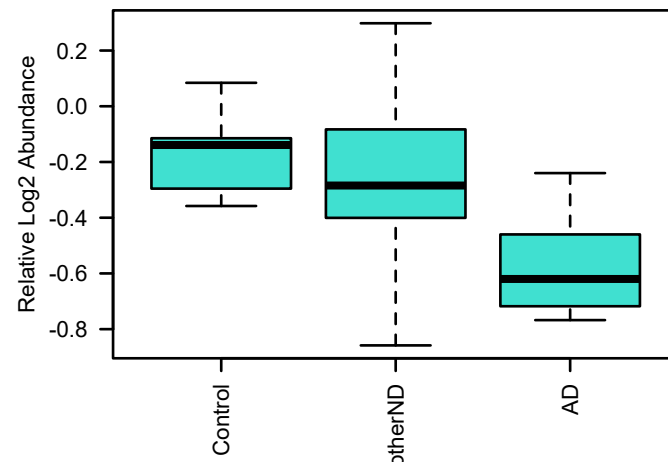

**bicor=-0.31, p=0.0047**  
**cor=-0.33, p=0.0022**

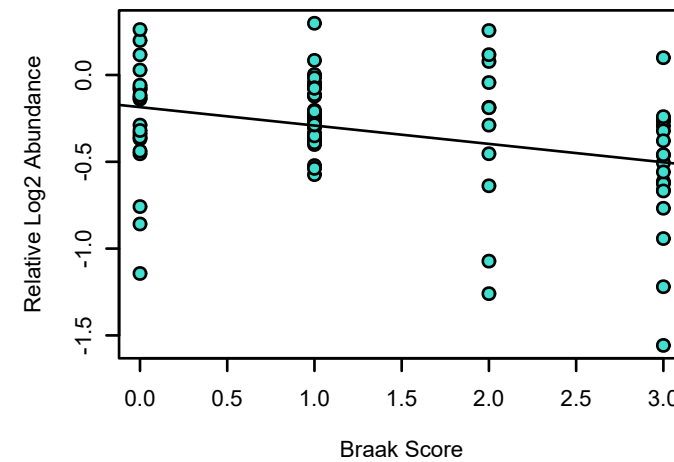

**bicor=-0.28, p=0.0042**  
**cor=-0.32, p=0.0012**

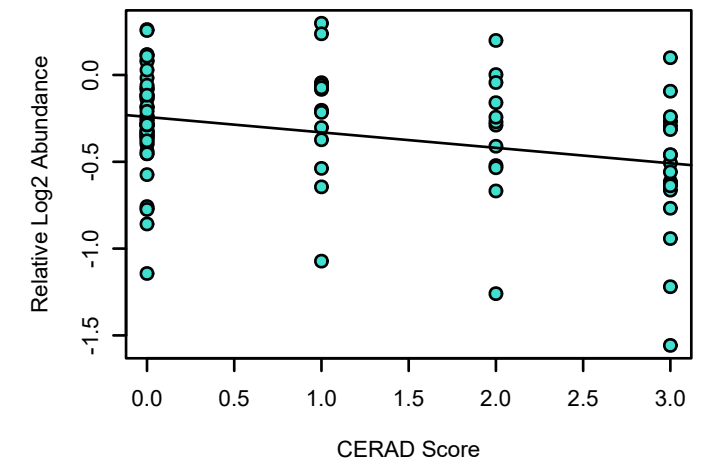



**OLFM1 UPenn Mixed PRM**  
M3 brown MEGA module member  
K-W ANOVA p: 2.2e-06

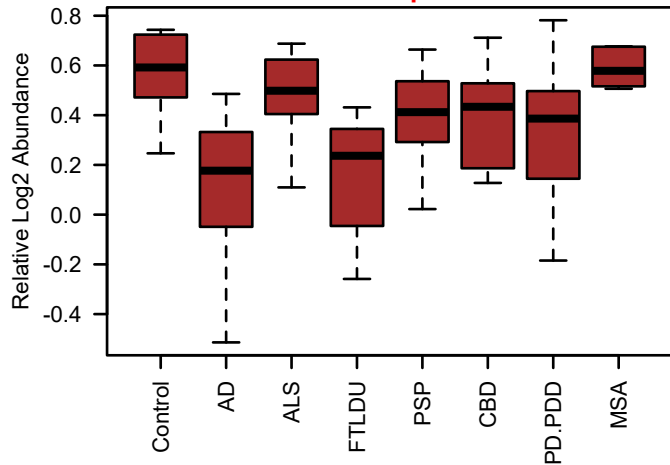

**OLFM1 UPenn Mixed PRM**  
K-W ANOVA p: 1.3e-05

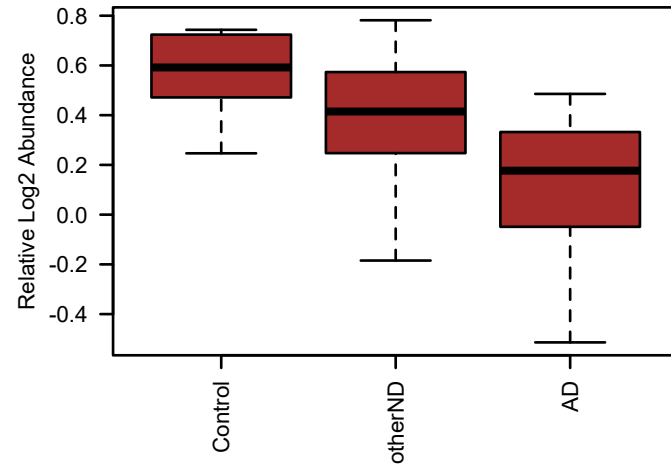

**bicor=-0.37, p=0.00053**  
**cor=-0.38, p=0.00036**

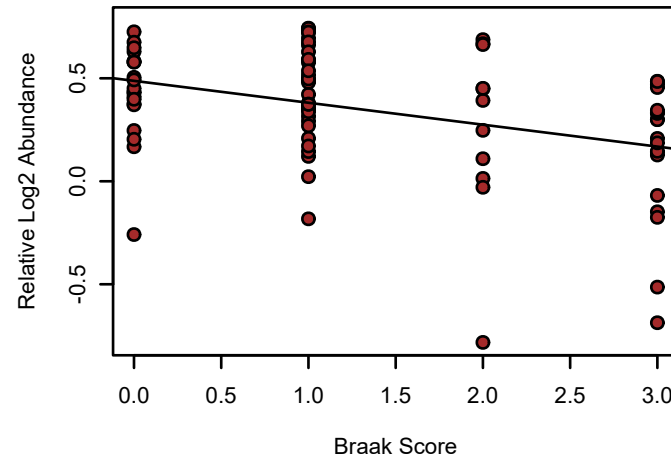

**bicor=-0.3, p=0.0021**  
**cor=-0.33, p=8e-04**

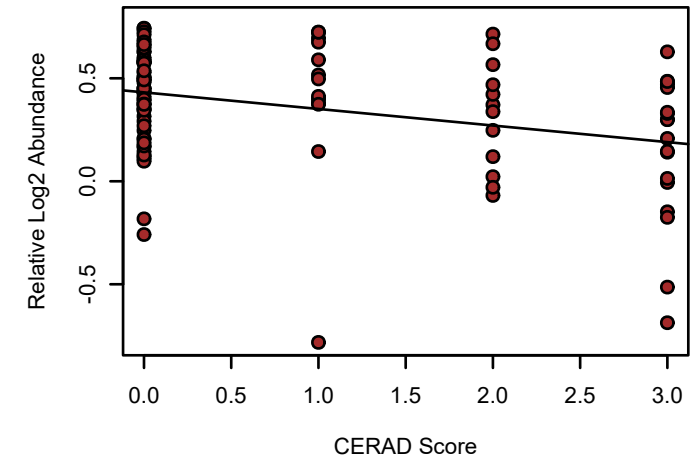

**ACO2 UPenn Mixed PRM**  
M3 brown MEGA module member  
K-W ANOVA p: 0.032

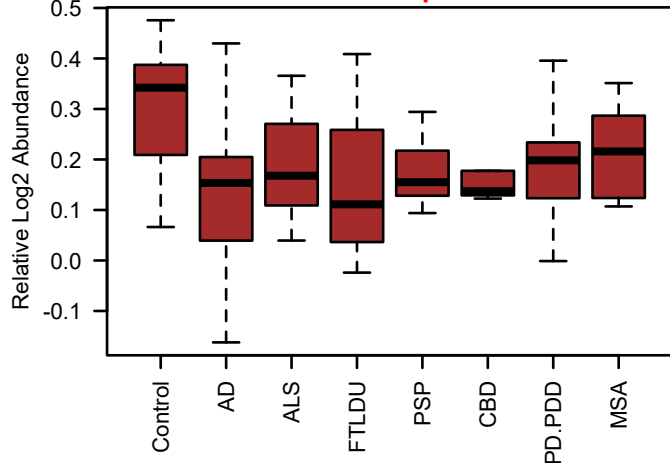

**ACO2 UPenn Mixed PRM**  
K-W ANOVA p: 0.00086

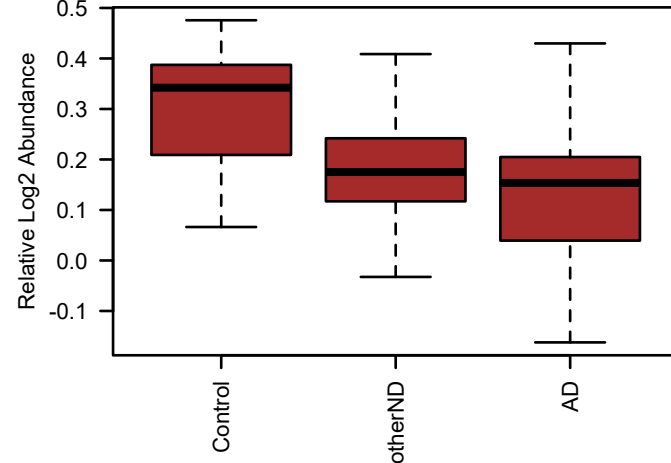

**bicor=-0.23, p=0.038**  
**cor=-0.28, p=0.0099**

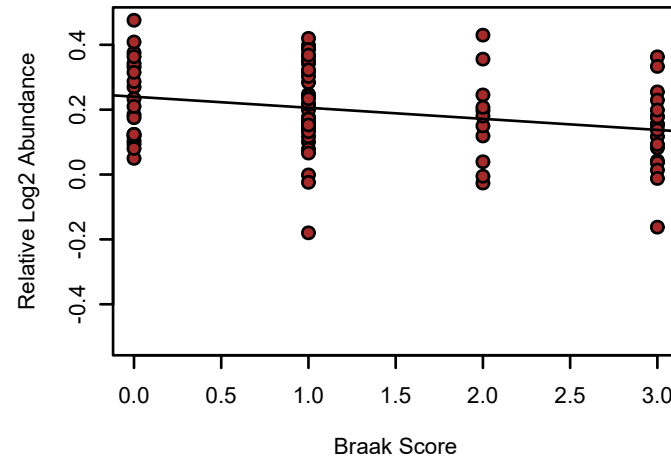

**bicor=-0.2, p=0.041**  
**cor=-0.2, p=0.046**

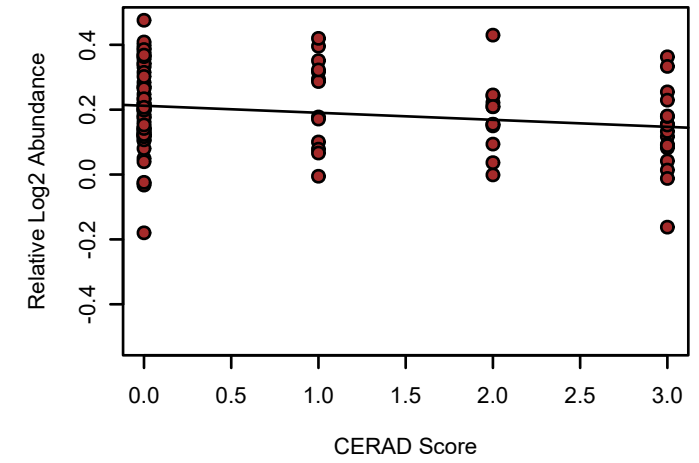

**SGIP1 UPenn Mixed PRM**  
M1 turquoise MEGA module member  
K-W ANOVA p: 0.00097

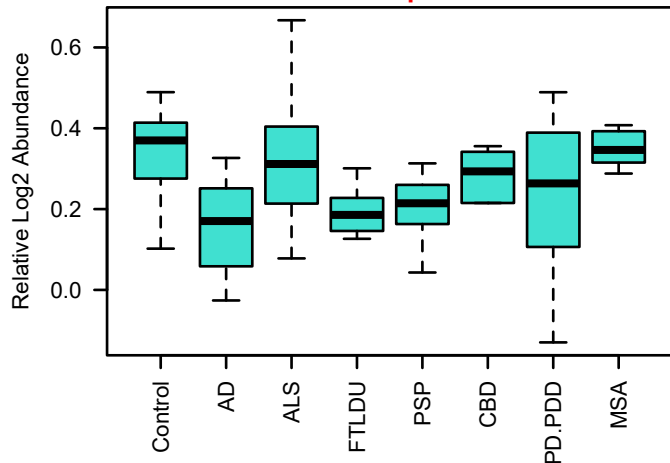

**SGIP1 UPenn Mixed PRM**  
K-W ANOVA p: 0.00022

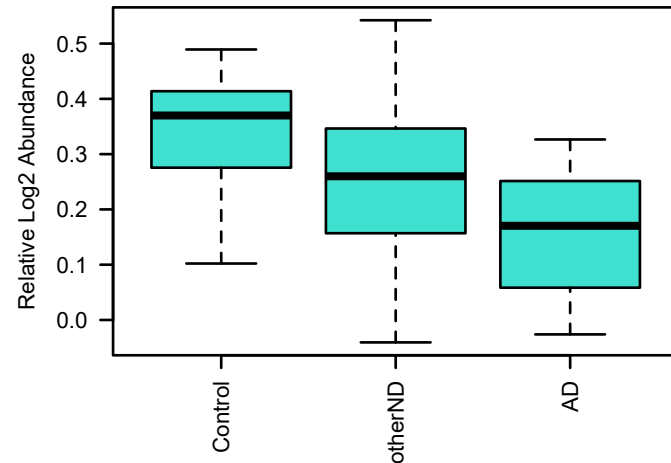

**bicor=-0.4, p=2e-04**  
**cor=-0.41, p=0.00011**

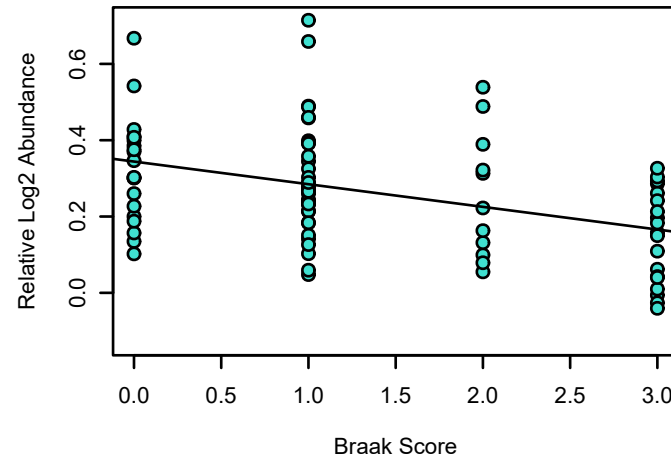

**bicor=-0.24, p=0.018**  
**cor=-0.23, p=0.021**

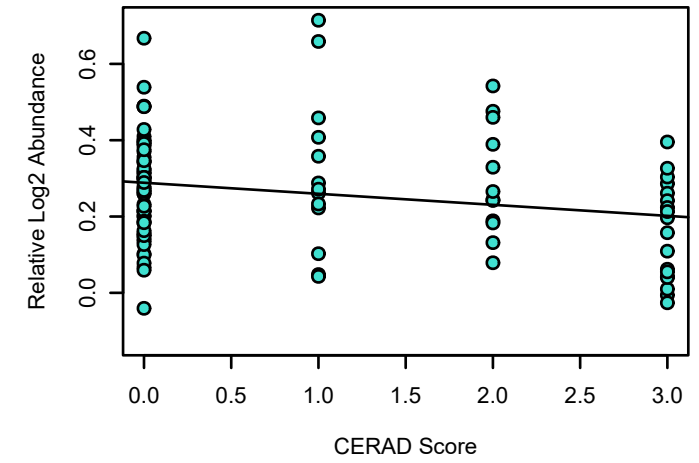

**SULT4A1 UPenn Mixed PRM**  
M12 tan MEGA module member  
K-W ANOVA p: 0.0094

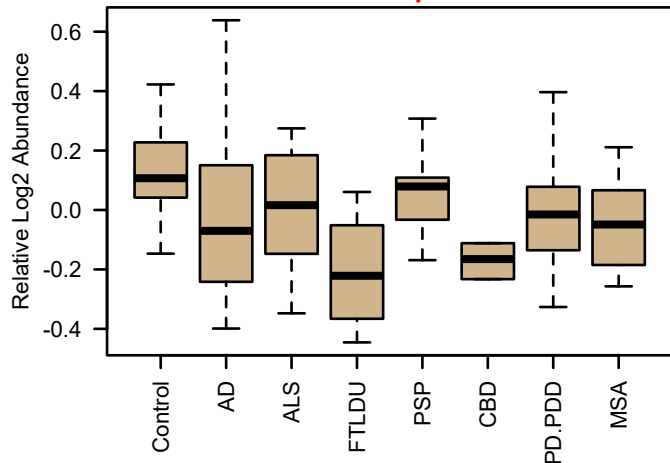

**SULT4A1 UPenn Mixed PRM**  
K-W ANOVA p: 0.073

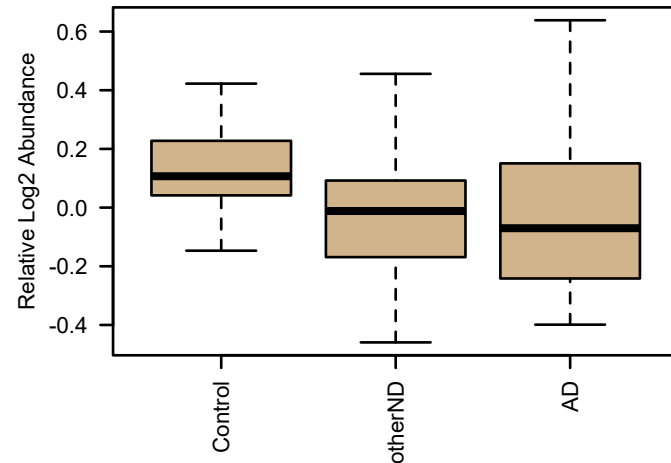

**bicor=-0.1, p=0.37**  
**cor=-0.11, p=0.32**

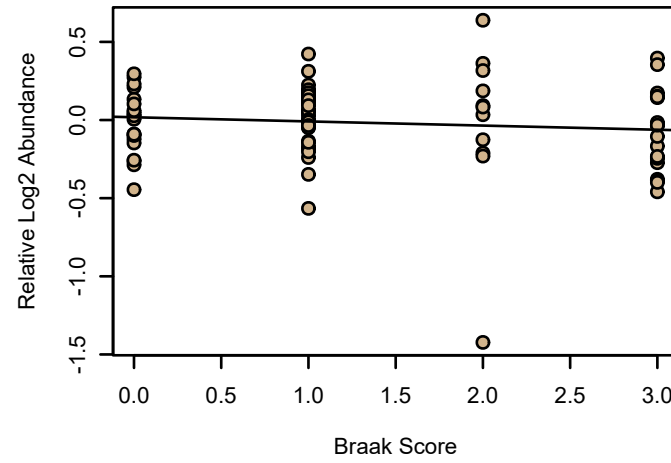

**bicor=-0.11, p=0.26**  
**cor=-0.081, p=0.42**

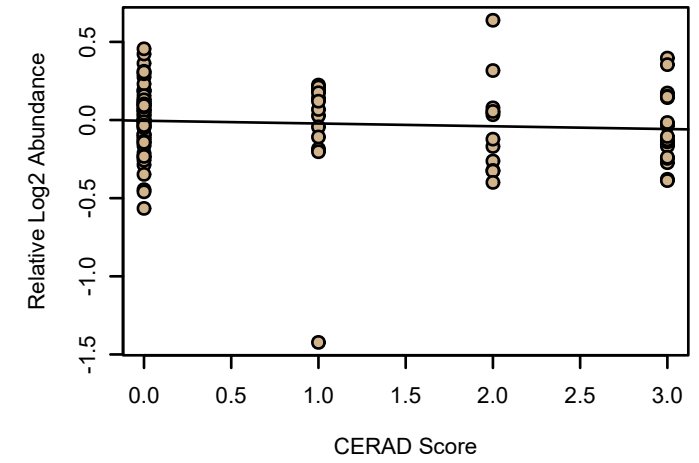

**CHCHD6 UPenn Mixed PRM**  
M1 turquoise MEGA module member  
K-W ANOVA p: 0.12

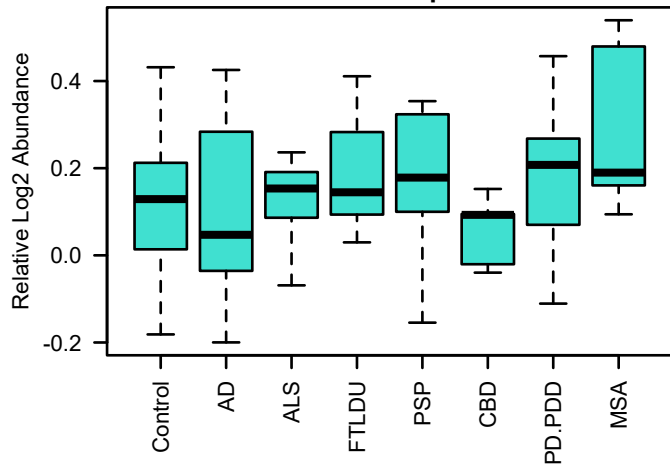

**CHCHD6 UPenn Mixed PRM**  
K-W ANOVA p: 0.061

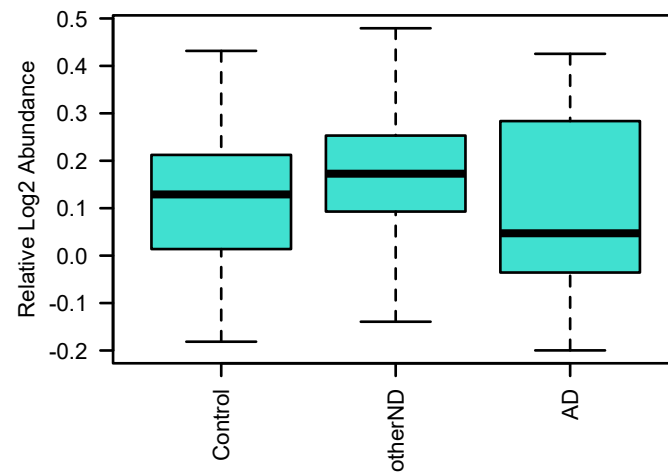

**bicor=-0.12, p=0.26**  
**cor=-0.11, p=0.32**

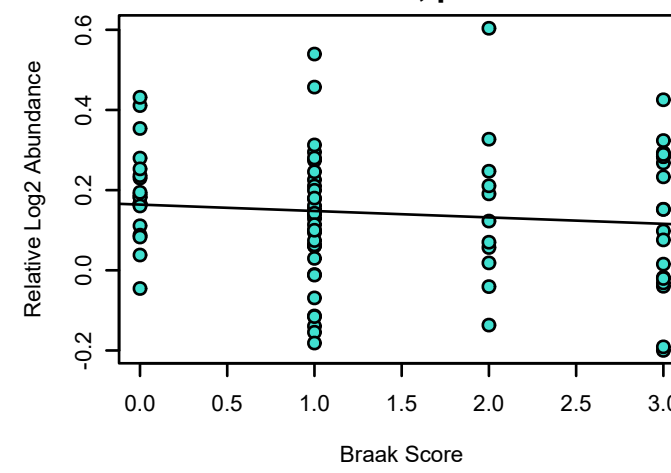

**bicor=-0.12, p=0.23**  
**cor=-0.15, p=0.14**

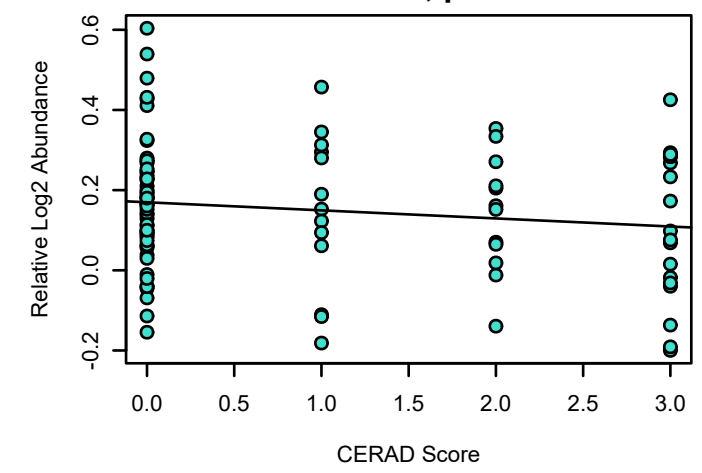

**PACSN1 UPenn Mixed PRM**  
M1 turquoise MEGA module member  
K-W ANOVA p: 1.4e-05

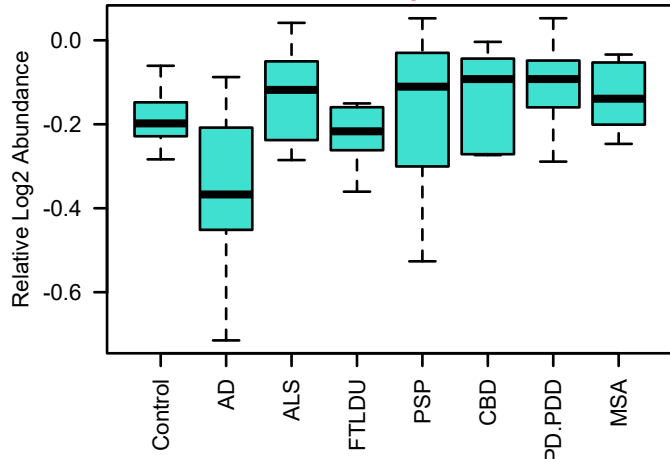

**PACSN1 UPenn Mixed PRM**  
K-W ANOVA p: 1.2e-07

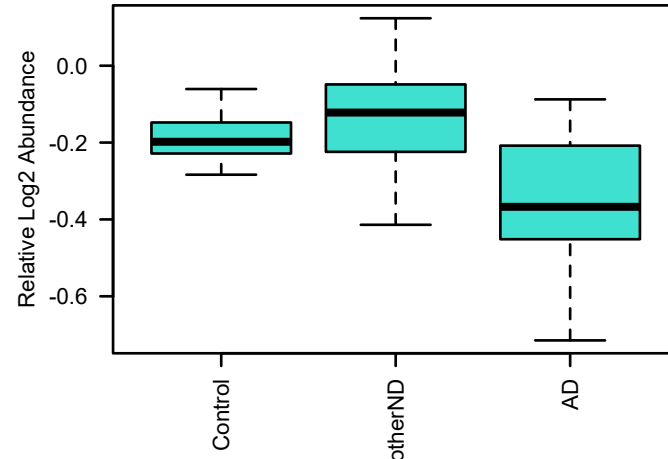

**bicor=-0.34, p=0.0016**  
**cor=-0.37, p=0.00053**

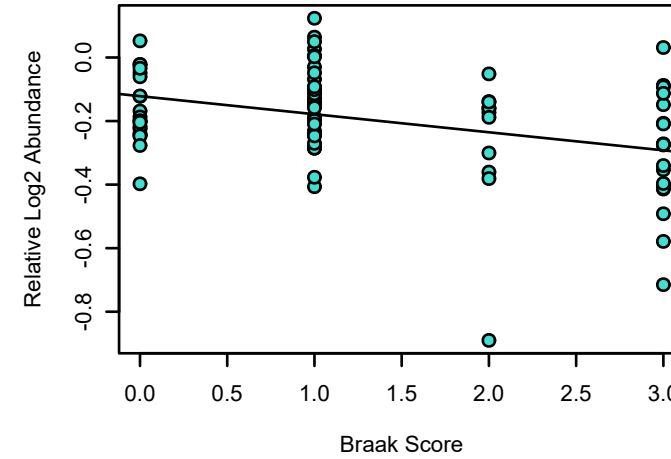

**bicor=-0.25, p=0.011**  
**cor=-0.3, p=0.0024**

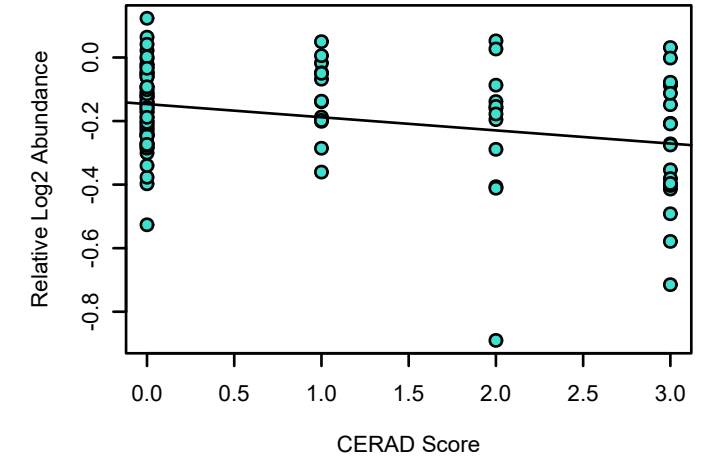

**CDC42EP4 UPenn Mixed PRM**  
NA grey MEGA module member  
K-W ANOVA p: 0.022

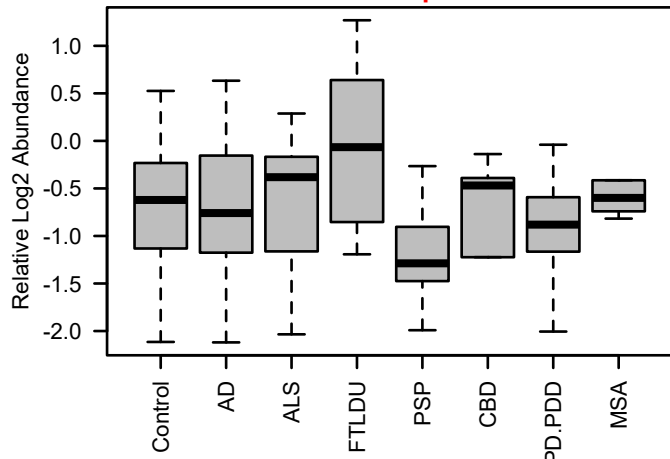

**CDC42EP4 UPenn Mixed PRM**  
K-W ANOVA p: 0.67

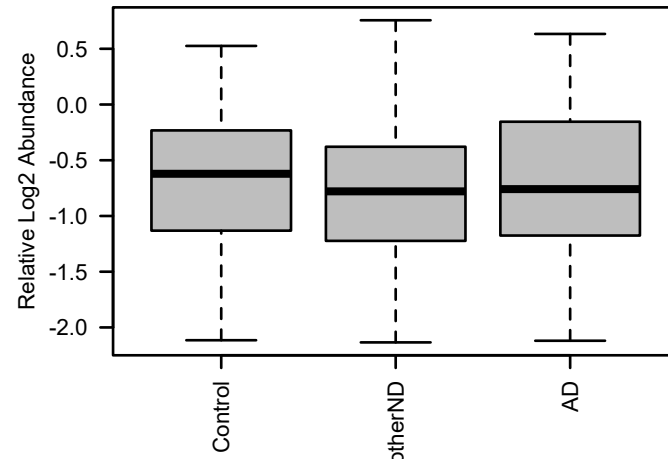

**bicor=0.0016, p=0.99**  
**cor=0.037, p=0.74**

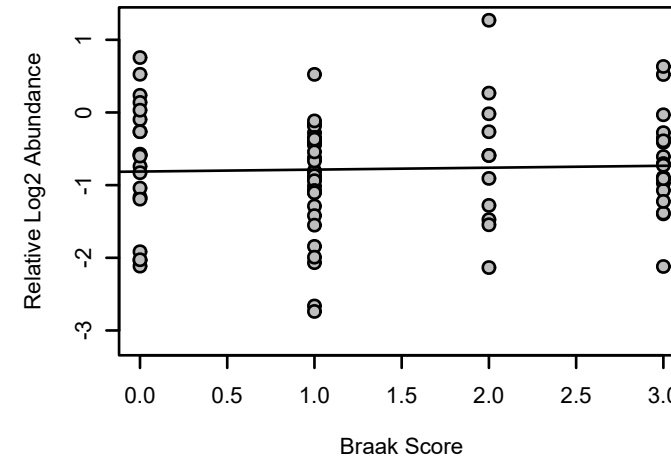

**bicor=0.036, p=0.72**  
**cor=0.052, p=0.61**

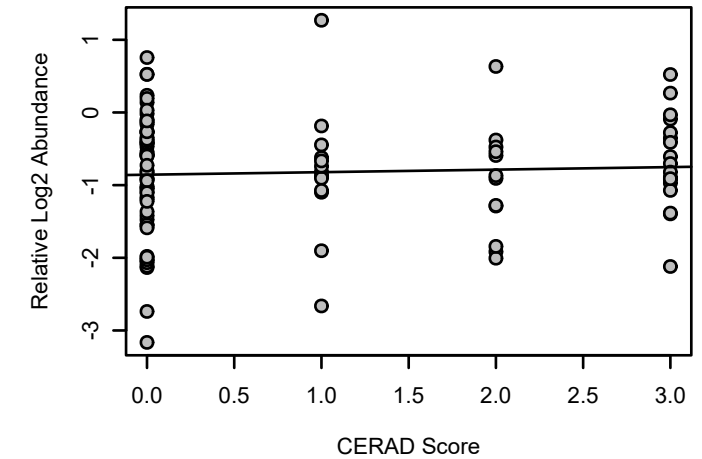

**CACYBP UPenn Mixed PRM**  
M11 greenyellow MEGA module member  
K-W ANOVA p: 0.0077

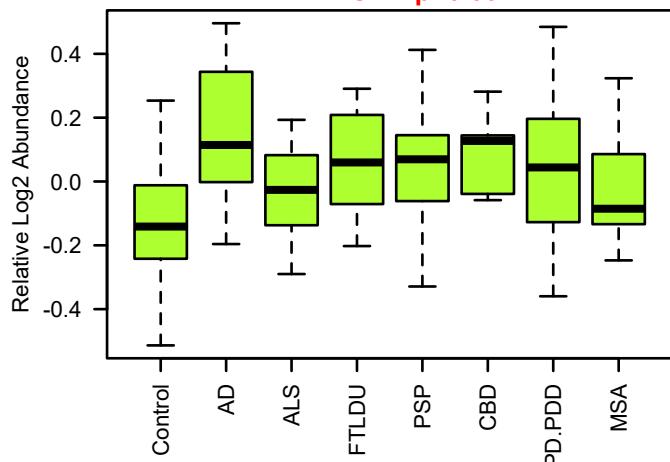

**CACYBP UPenn Mixed PRM**  
K-W ANOVA p: 0.00024

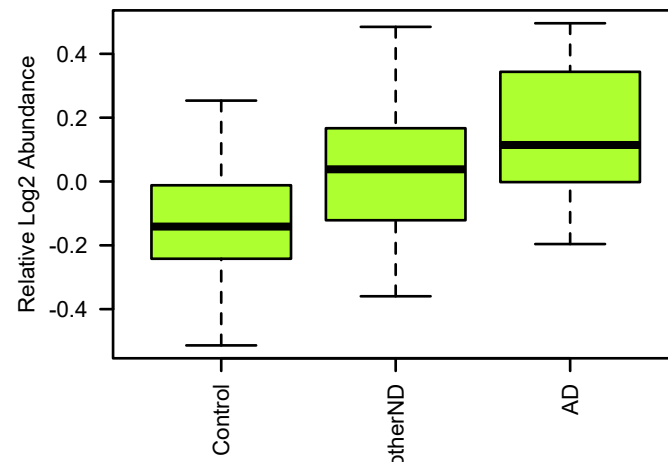

**bicor=0.33, p=0.002**  
**cor=0.34, p=0.0016**

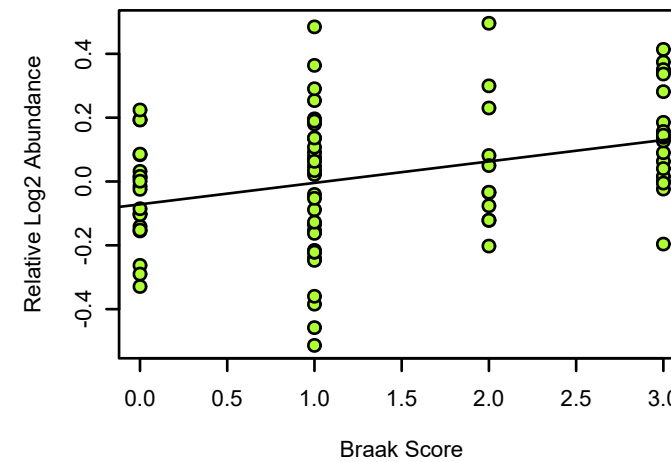

**bicor=0.13, p=0.19**  
**cor=0.13, p=0.2**

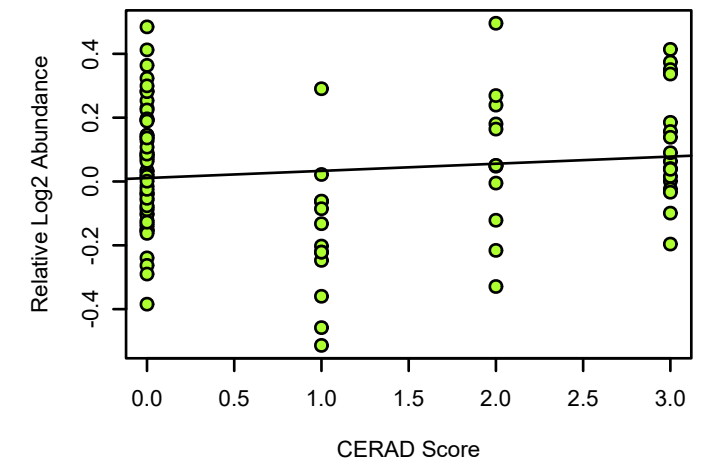

VAT1L UPenn Mixed PRM  
M1 turquoise MEGA module member  
K-W ANOVA p: 0.19

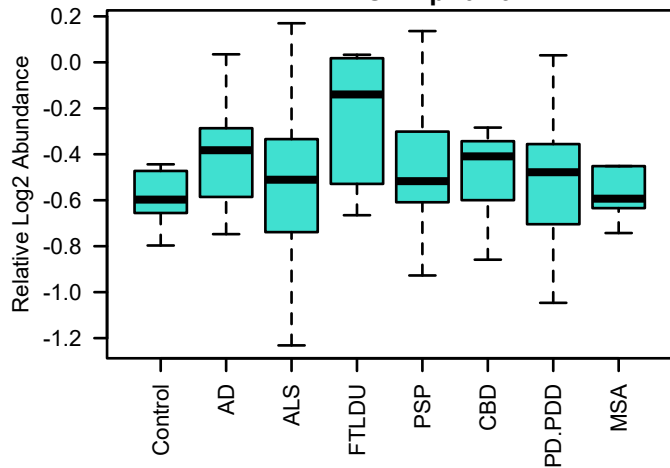

VAT1L UPenn Mixed PRM  
K-W ANOVA p: 0.42

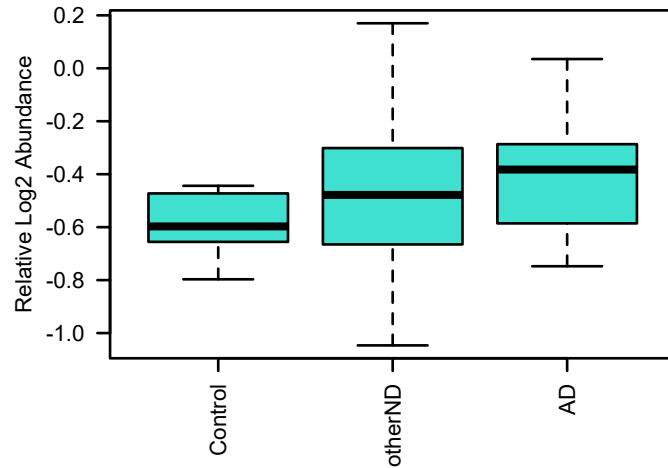

bicor=0.15, p=0.18  
cor=0.13, p=0.24

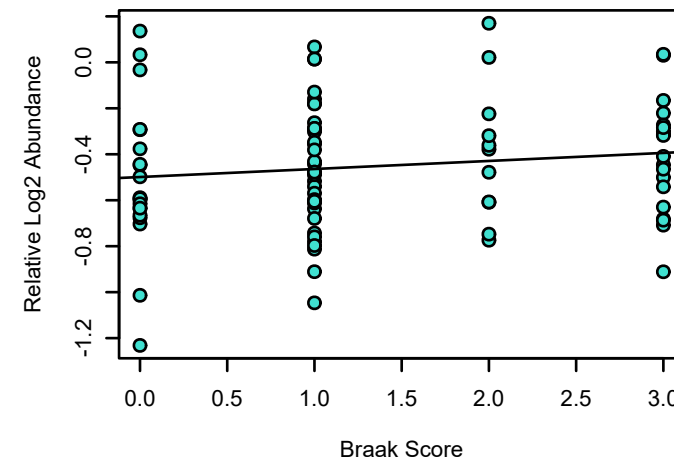

bicor=0.14, p=0.18  
cor=0.13, p=0.2

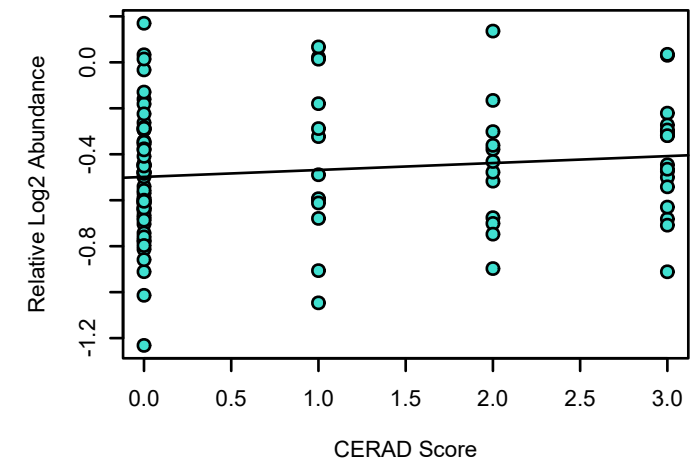

PLCB1 UPenn Mixed PRM  
M3 brown MEGA module member  
K-W ANOVA p: 4.3e-05

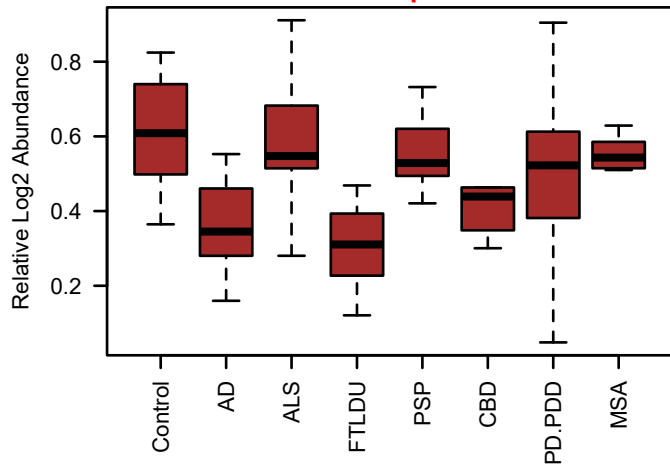

PLCB1 UPenn Mixed PRM  
K-W ANOVA p: 0.00045

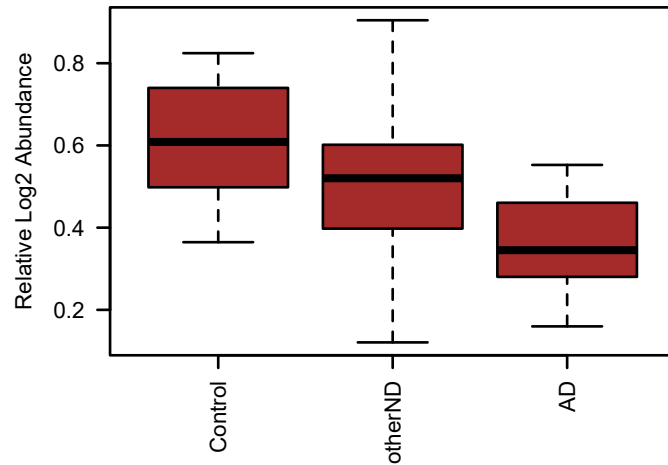

bicor=-0.37, p=0.00056  
cor=-0.36, p=0.00077

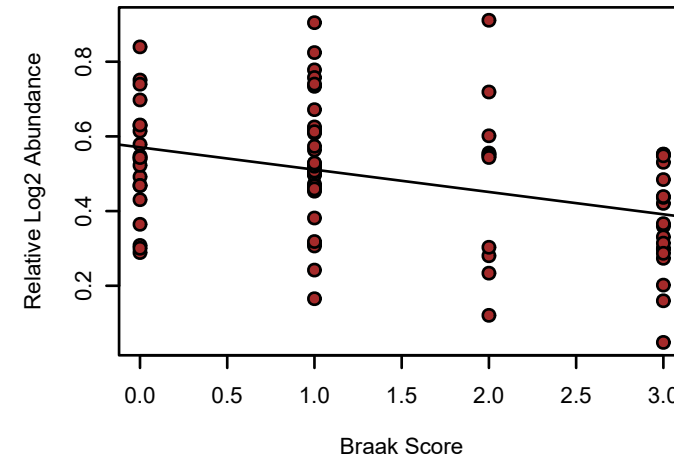

bicor=-0.39, p=7.6e-05  
cor=-0.39, p=6e-05

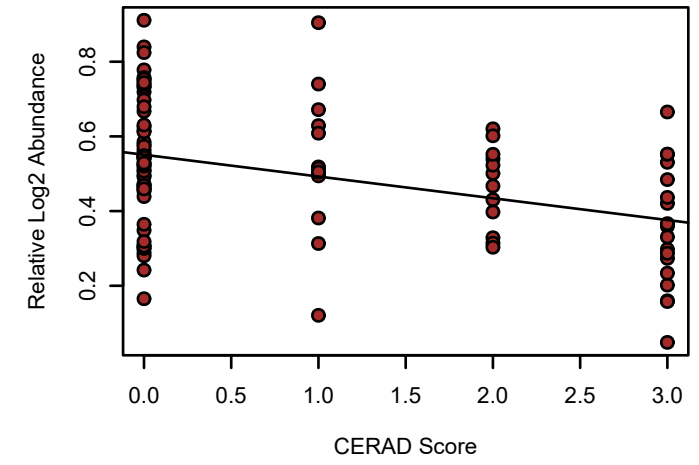

RTN4 UPenn Mixed PRM  
M6 red MEGA module member  
K-W ANOVA p: 0.28

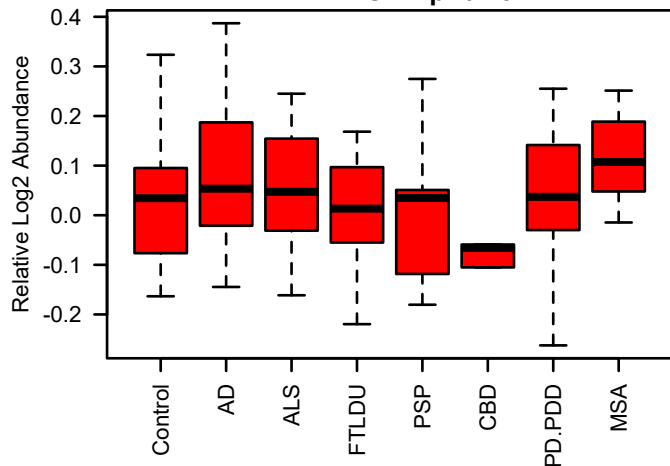

RTN4 UPenn Mixed PRM  
K-W ANOVA p: 0.39

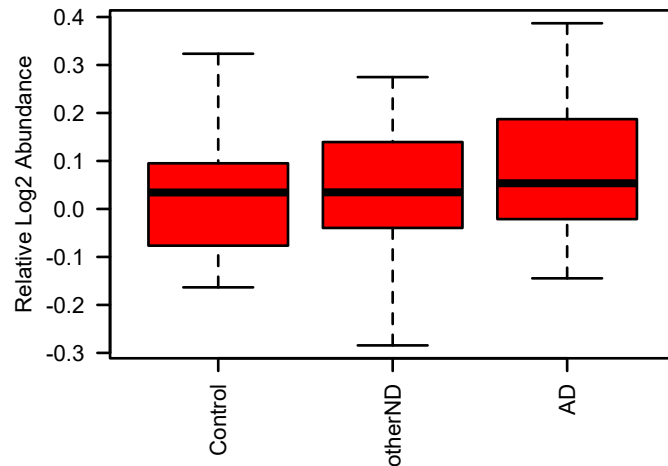

bicor=0.062, p=0.57  
cor=0.08, p=0.47

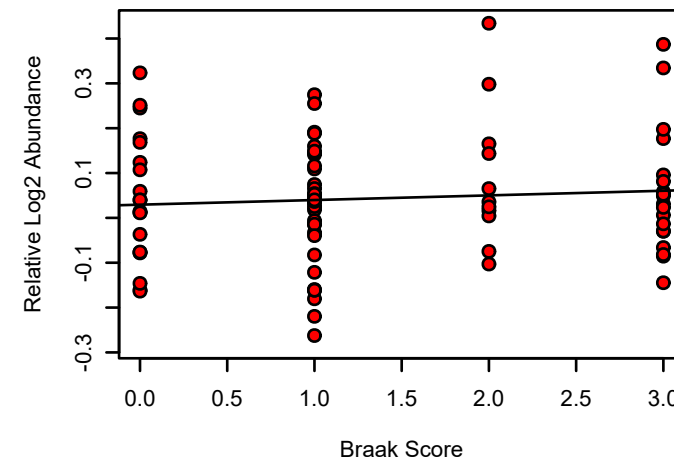

bicor=0.085, p=0.4  
cor=0.1, p=0.32

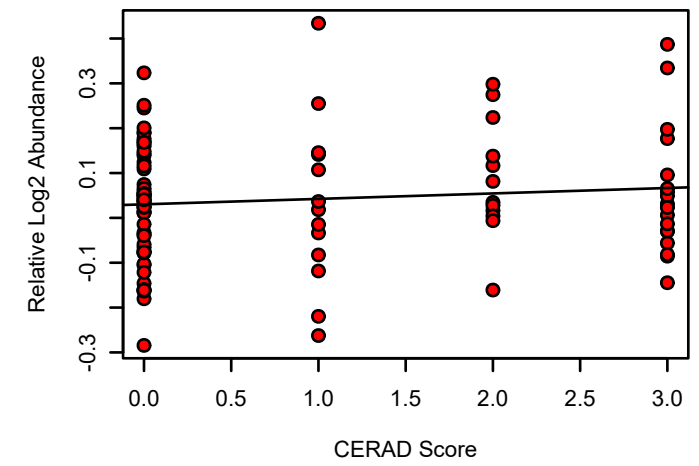

GPHN UPenn Mixed PRM  
M1 turquoise MEGA module member  
K-W ANOVA p: 2.8e-06

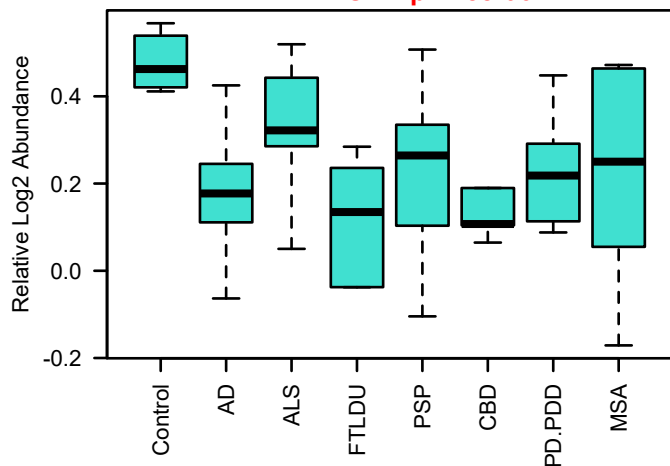

GPHN UPenn Mixed PRM  
K-W ANOVA p: 1.3e-05

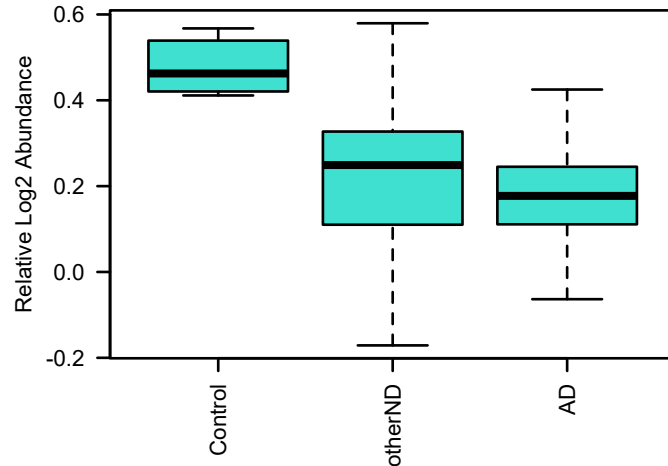

bicor=-0.23, p=0.037  
cor=-0.25, p=0.022

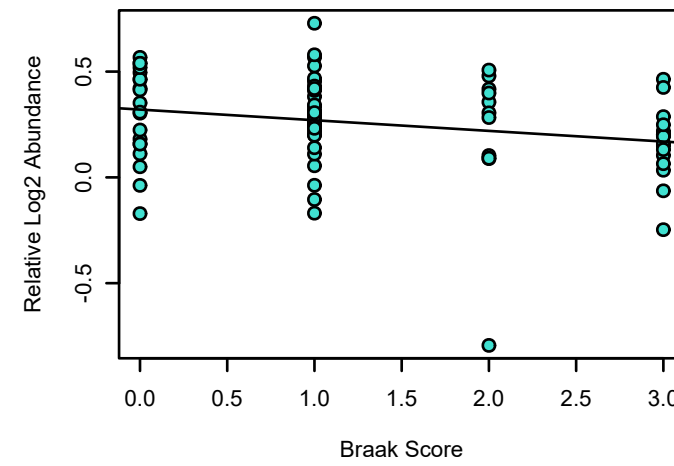

bicor=-0.27, p=0.0061  
cor=-0.24, p=0.016

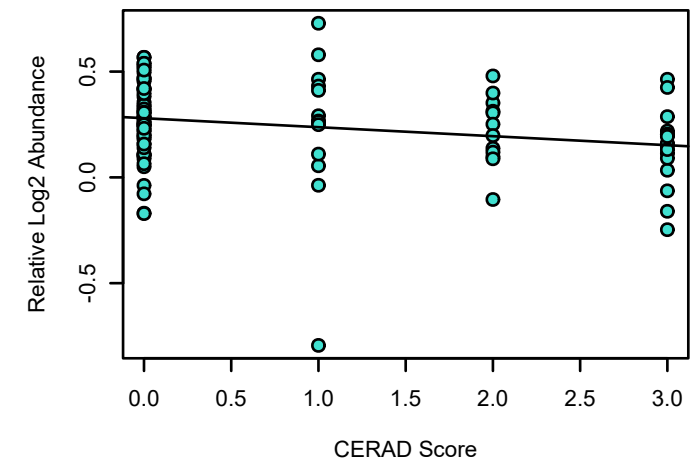

**LANCL2 UPenn Mixed PRM**  
M1 turquoise MEGA module member  
K-W ANOVA p: 0.13

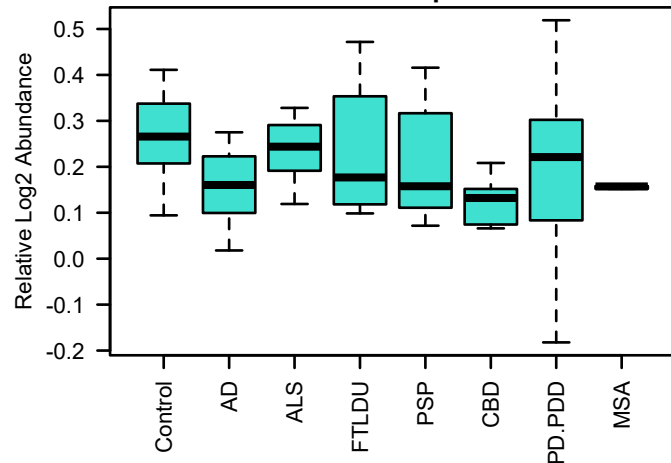

**LANCL2 UPenn Mixed PRM**  
K-W ANOVA p: 0.064

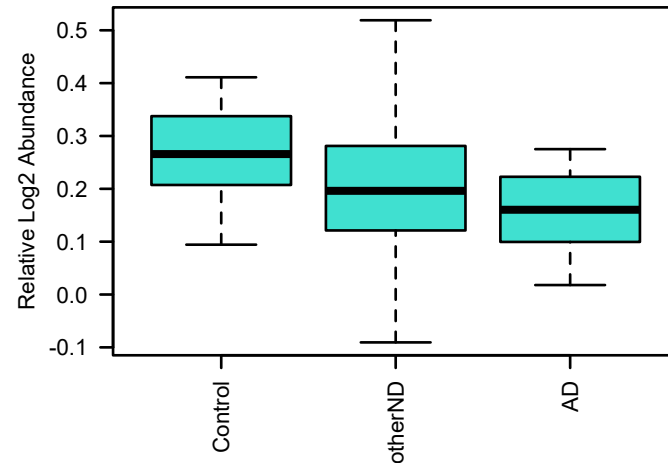

**bicor=-0.25, p=0.021**  
**cor=-0.27, p=0.013**

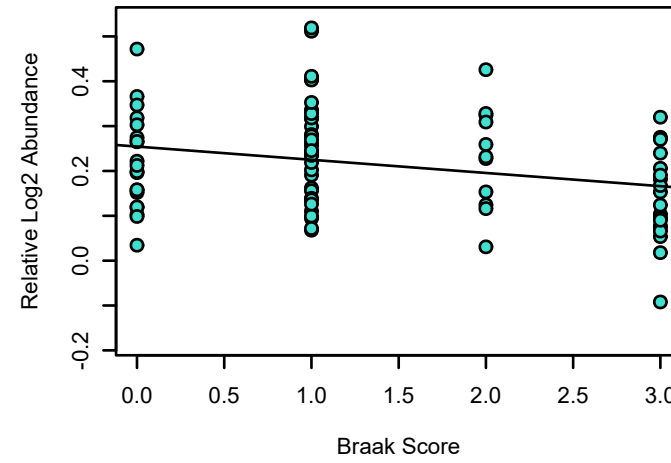

**bicor=-0.21, p=0.038**  
**cor=-0.23, p=0.021**

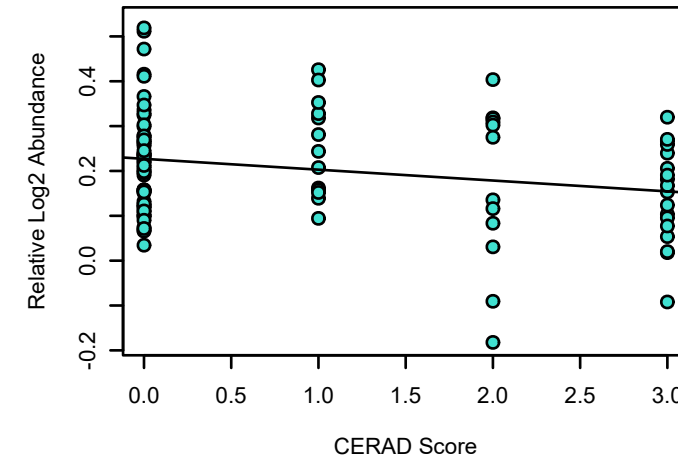

**FARSB UPenn Mixed PRM**  
M1 turquoise MEGA module member  
K-W ANOVA p: 2.2e-09

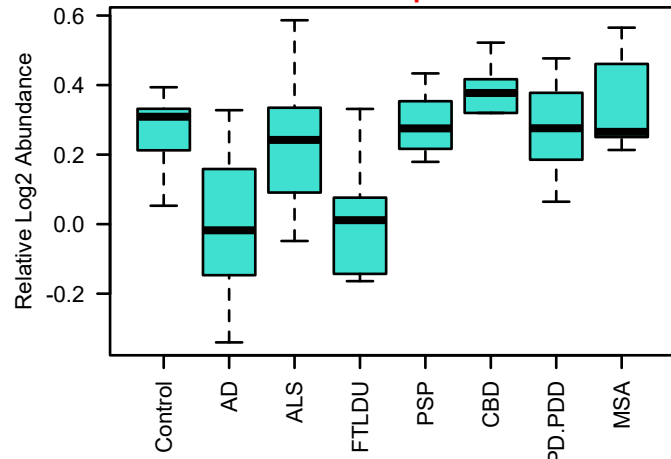

**FARSB UPenn Mixed PRM**  
K-W ANOVA p: 7e-06

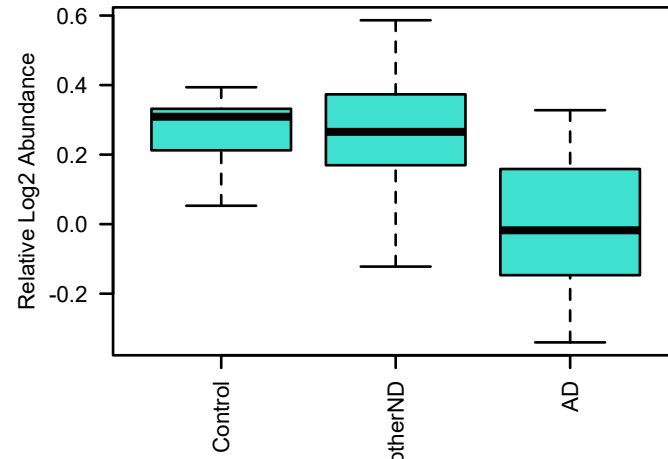

**bicor=-0.22, p=0.041**  
**cor=-0.28, p=0.0099**

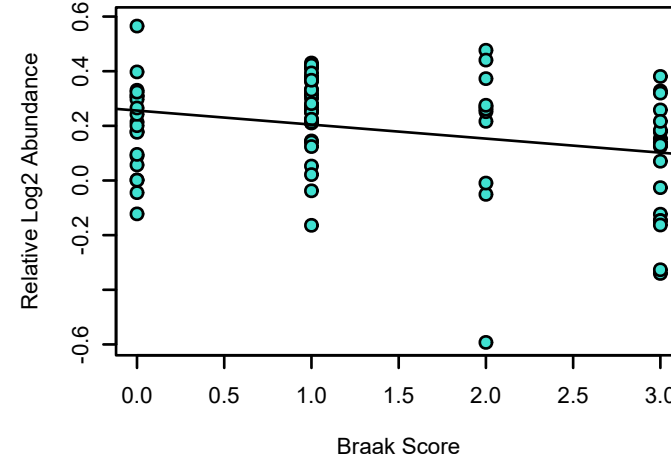

**bicor=-0.3, p=0.0022**  
**cor=-0.32, p=0.0012**

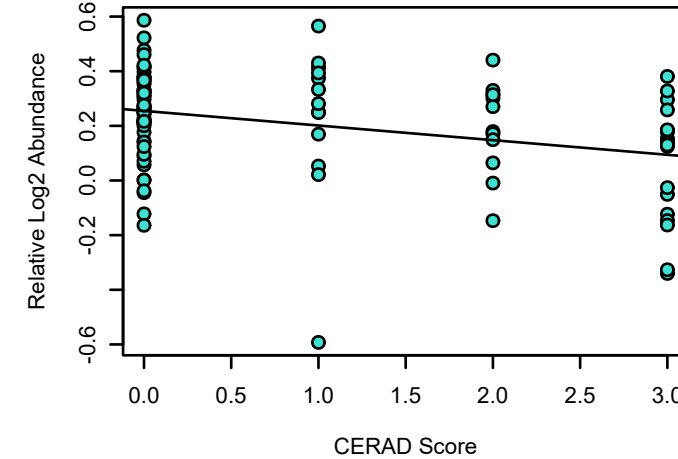

**TMEM30A UPenn Mixed PRM**  
NA grey MEGA module member  
K-W ANOVA p: 0.00027

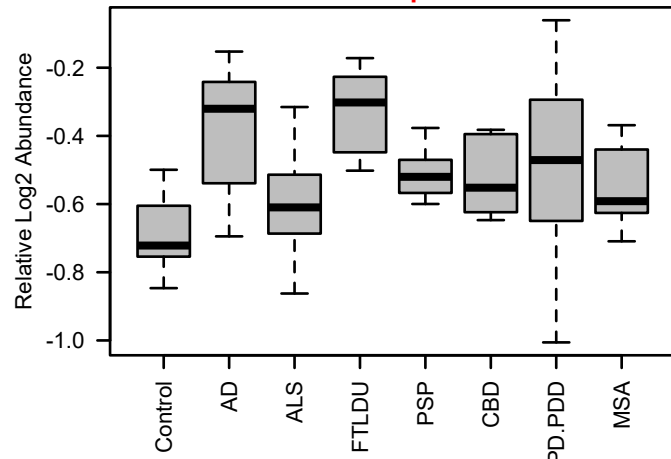

**TMEM30A UPenn Mixed PRM**  
K-W ANOVA p: 5.4e-05

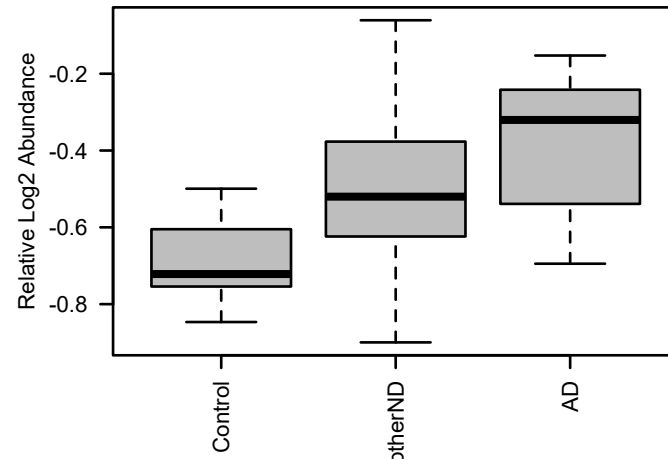

**bicor=0.43, p=4e-05**  
**cor=0.42, p=7e-05**

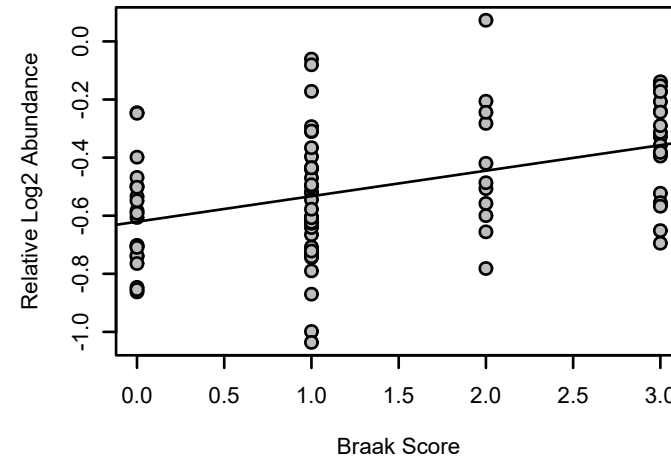

**bicor=0.35, p=0.00037**  
**cor=0.33, p=8e-04**

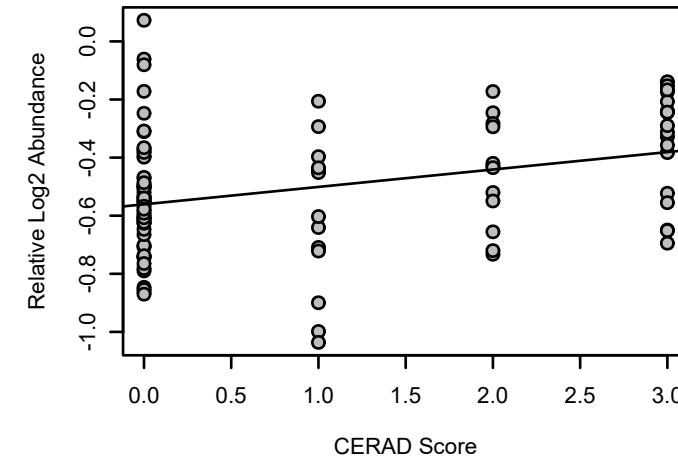

**NDUFB11 UPenn Mixed PRM**  
M3 brown MEGA module member  
K-W ANOVA p: 0.0033

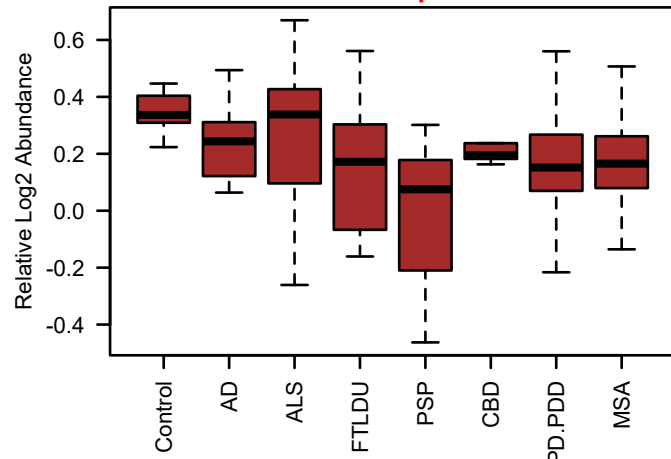

**NDUFB11 UPenn Mixed PRM**  
K-W ANOVA p: 0.0067

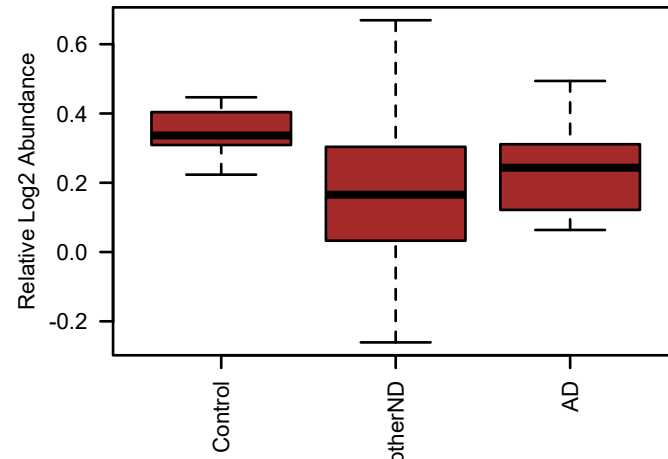

**bicor=-0.22, p=0.044**  
**cor=-0.19, p=0.083**

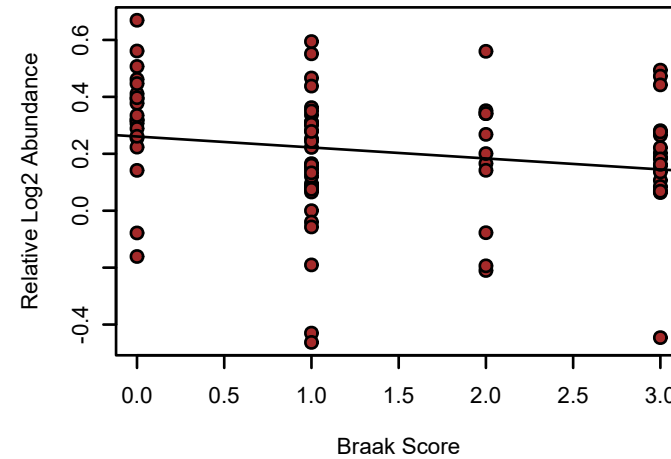

**bicor=-0.024, p=0.81**  
**cor=0.0071, p=0.94**

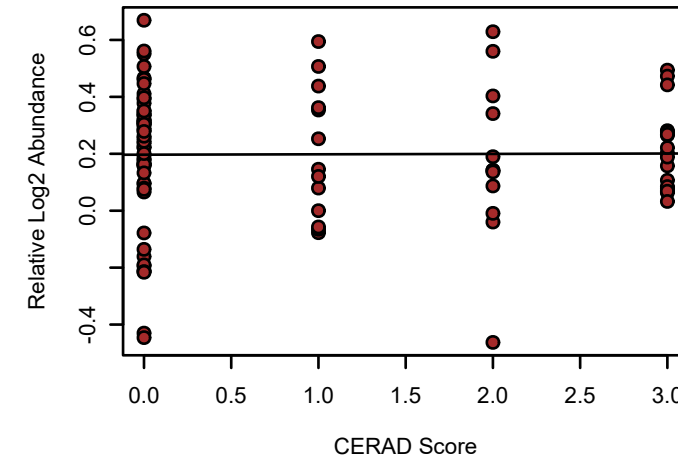

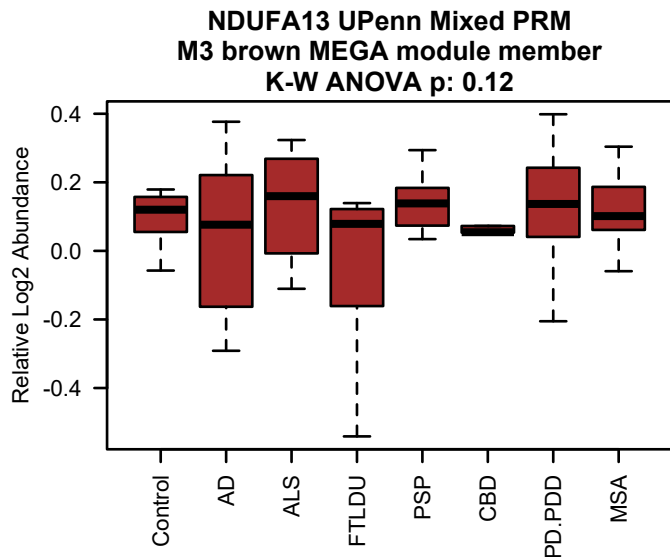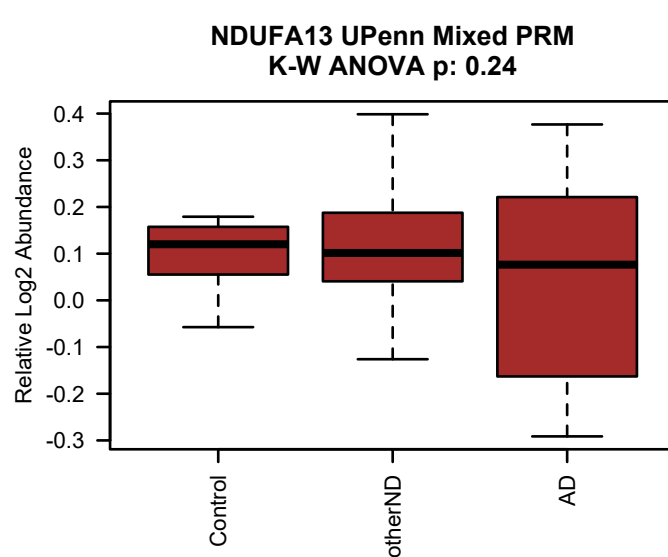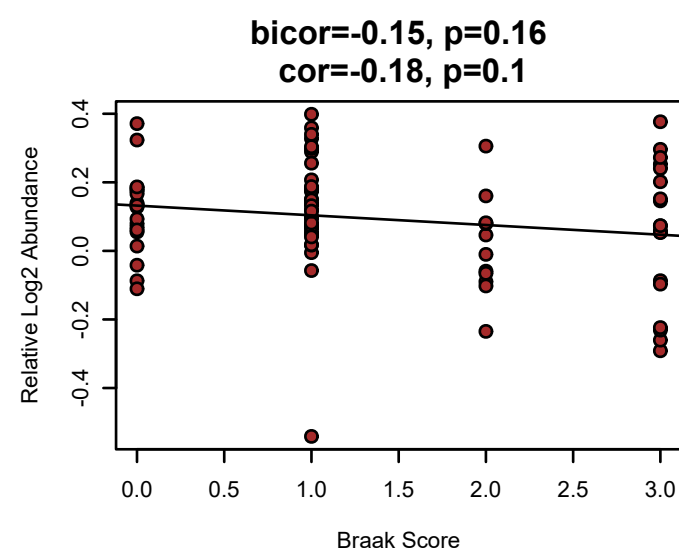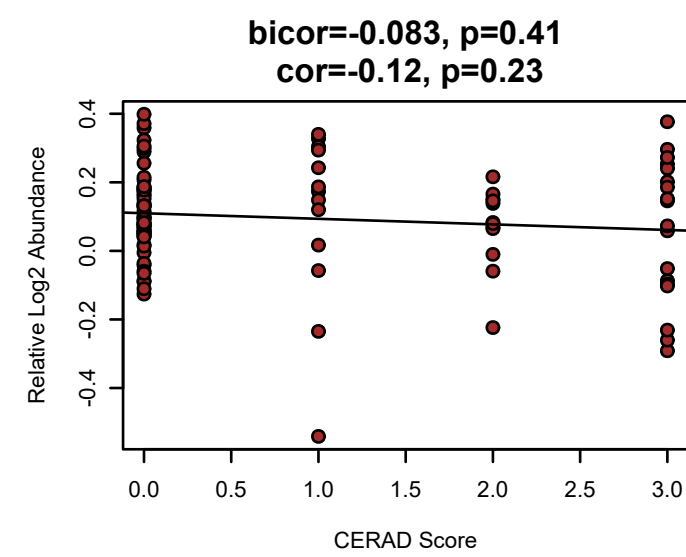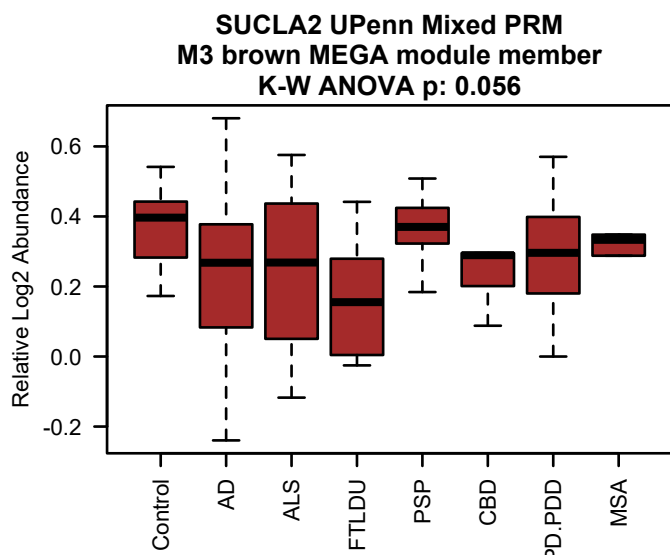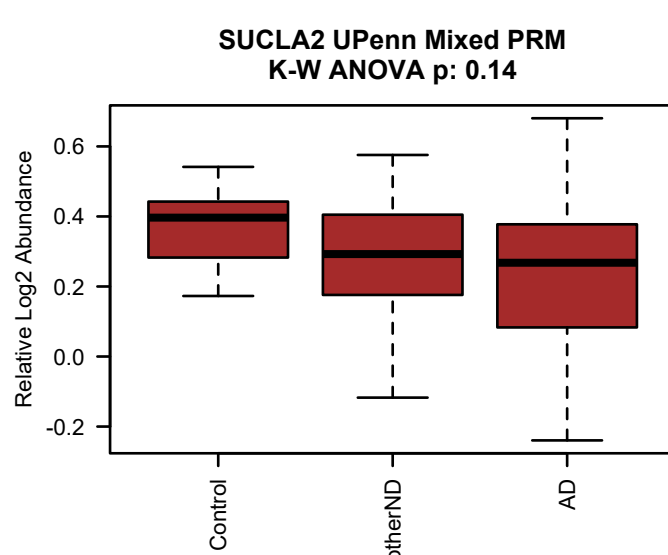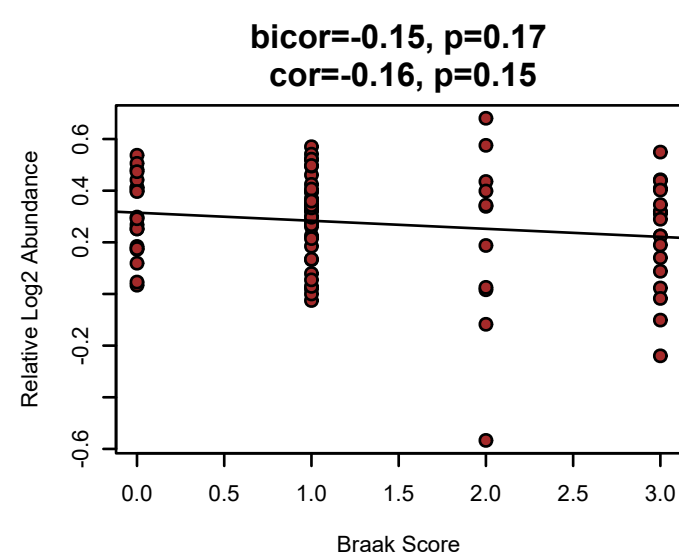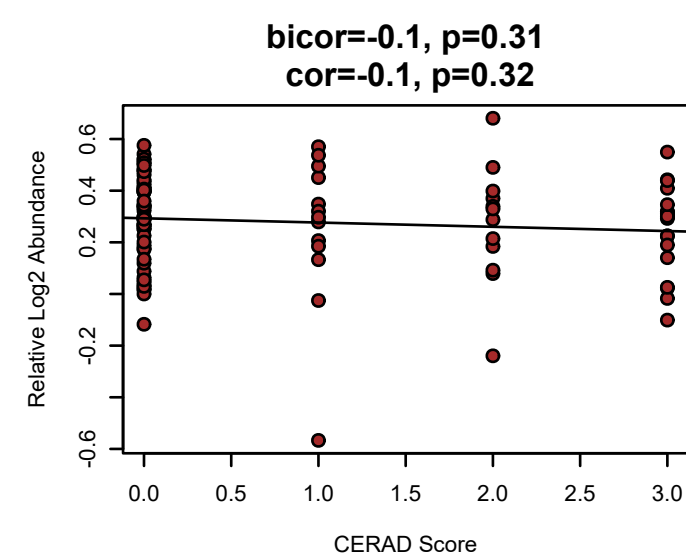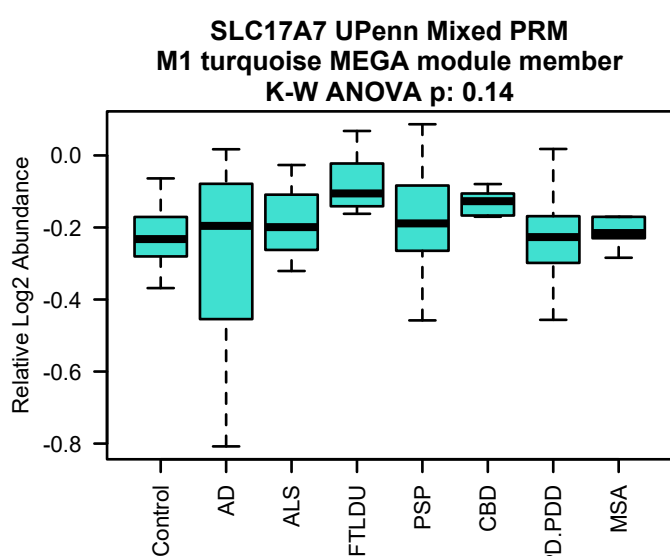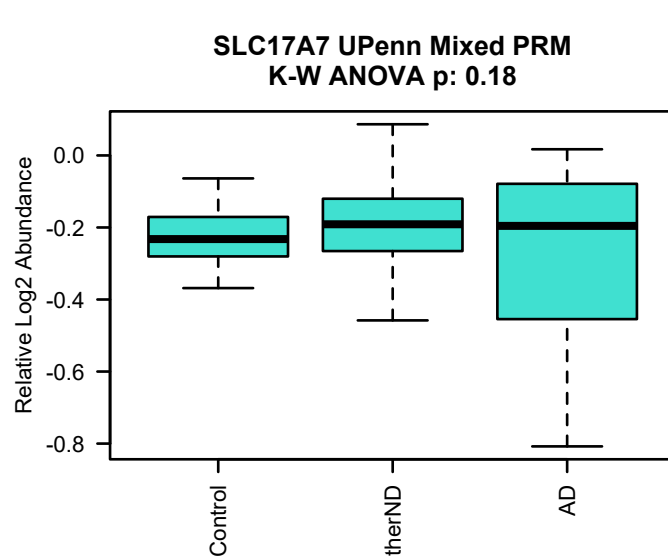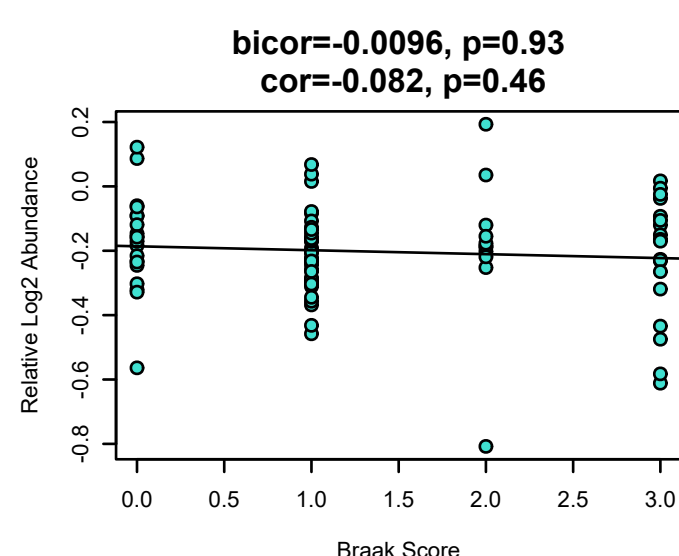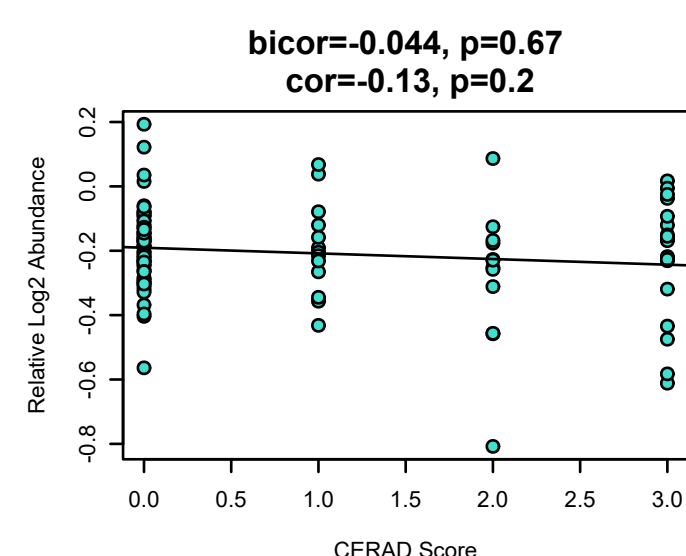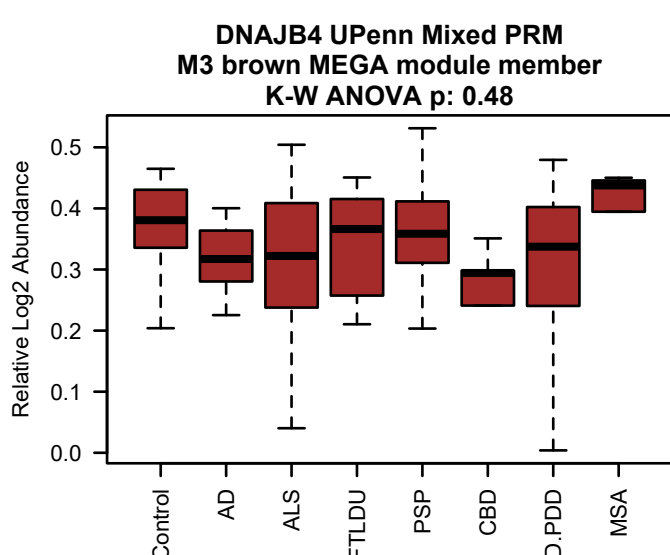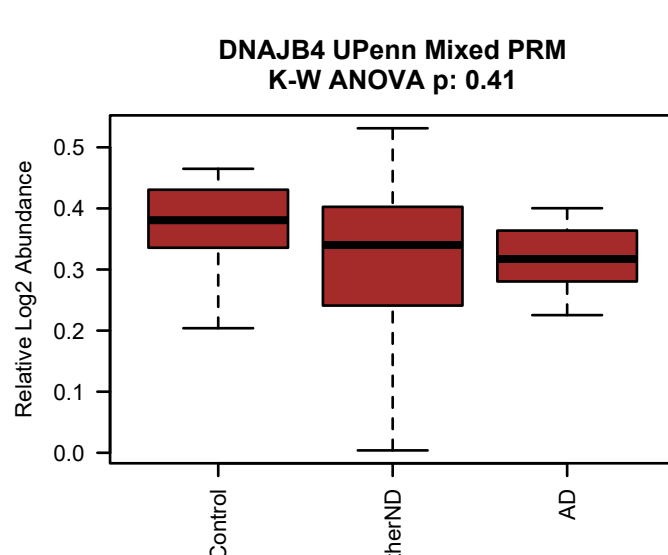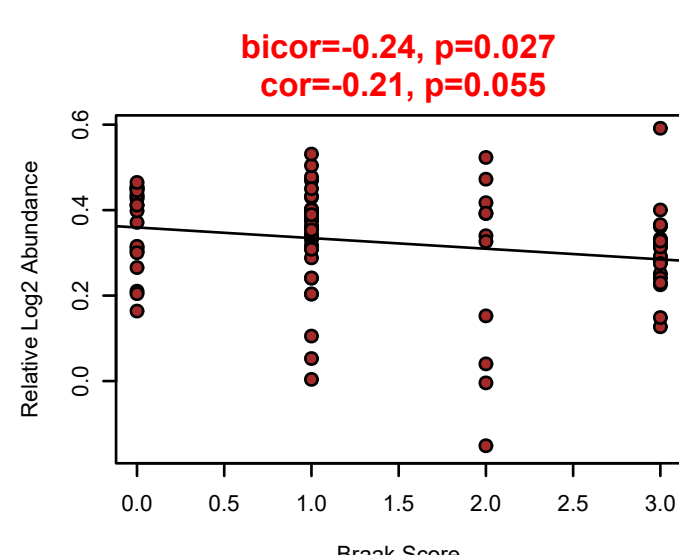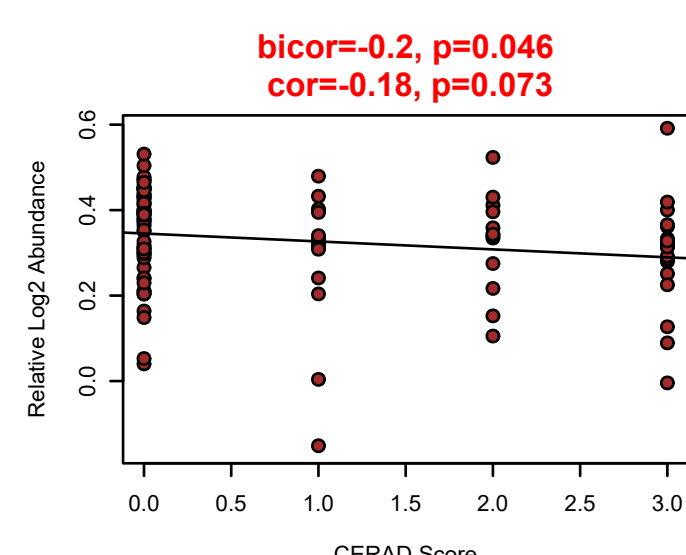

**SEPT1 UPenn Mixed PRM**  
NA grey20 MEGA module member  
K-W ANOVA p: 0.28

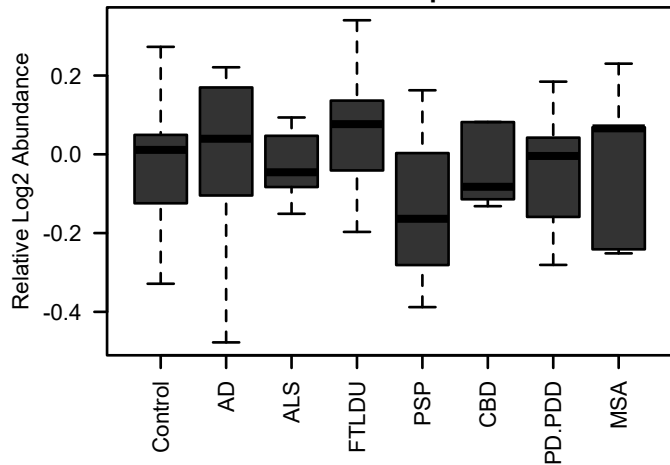

**SEPT1 UPenn Mixed PRM**  
K-W ANOVA p: 0.57

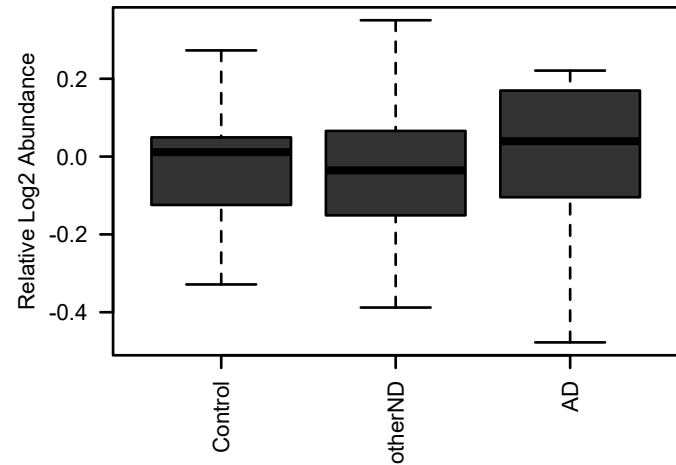

**bicor=0.016, p=0.89**  
**cor=0.05, p=0.65**

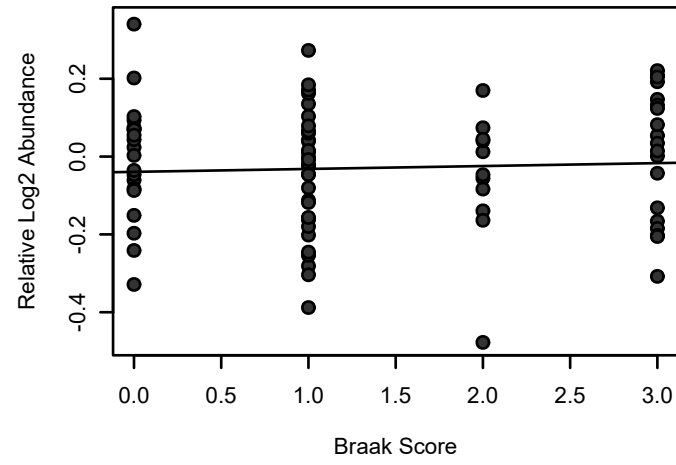

**bicor=0.12, p=0.23**  
**cor=0.094, p=0.35**

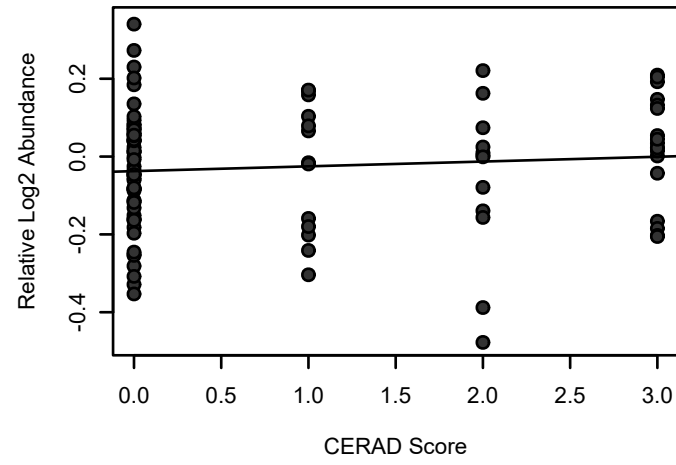

**SEPT3 UPenn Mixed PRM**  
M1 turquoise MEGA module member  
K-W ANOVA p: 0.43

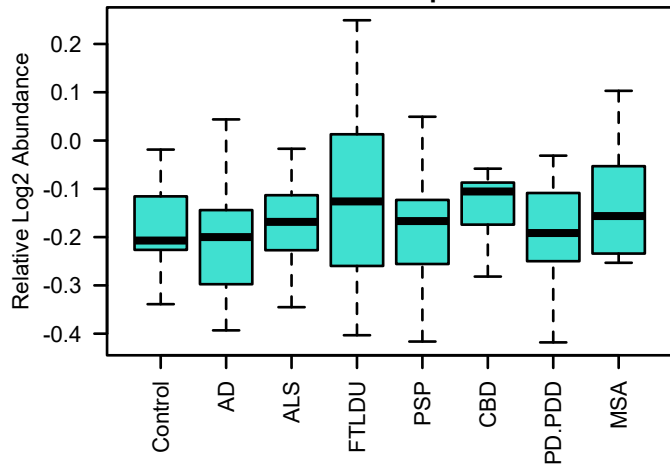

**SEPT3 UPenn Mixed PRM**  
K-W ANOVA p: 0.2

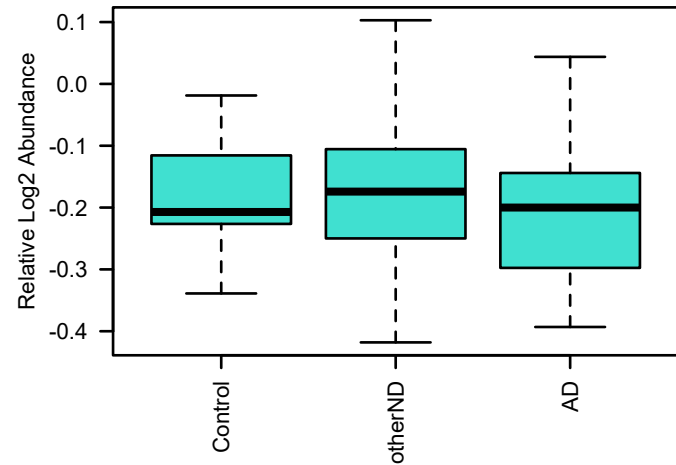

**bicor=-0.0011, p=0.99**  
**cor=-0.014, p=0.9**

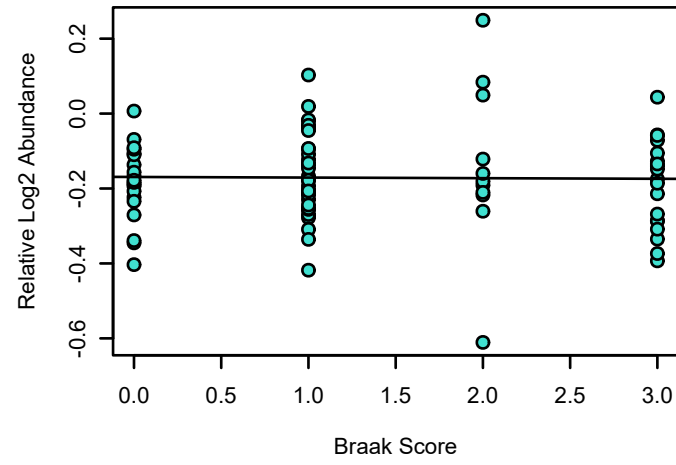

**bicor=-0.19, p=0.06**  
**cor=-0.18, p=0.073**

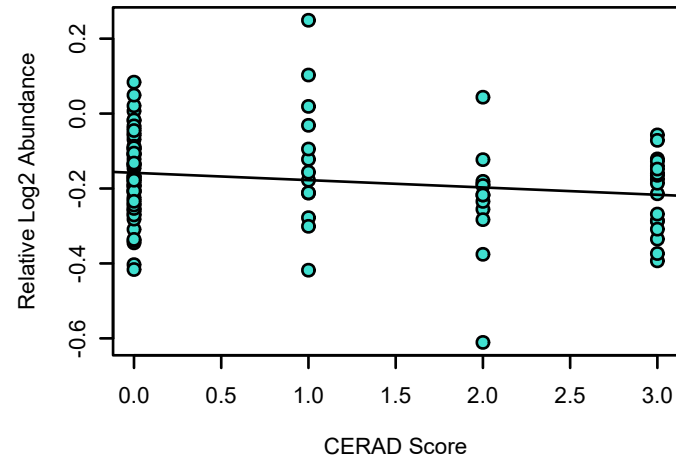

**ATP6V1H UPenn Mixed PRM**  
M1 turquoise MEGA module member  
K-W ANOVA p: 0.025

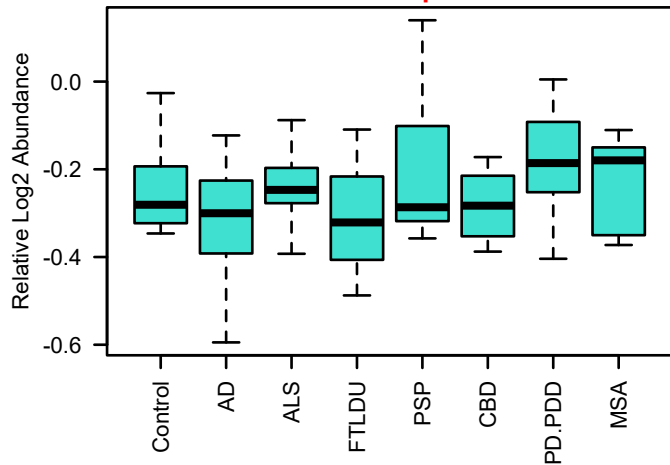

**ATP6V1H UPenn Mixed PRM**  
K-W ANOVA p: 0.02

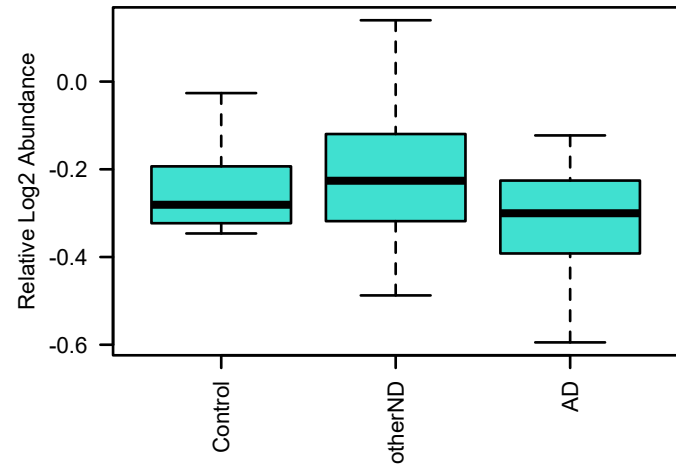

**bicor=-0.14, p=0.19**  
**cor=-0.19, p=0.083**

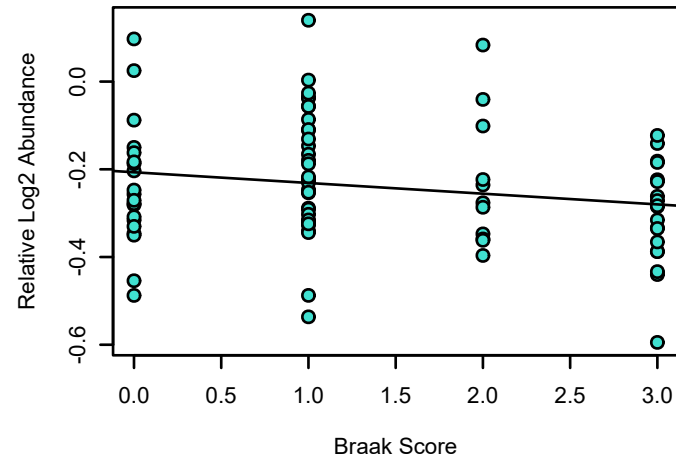

**bicor=0.0091, p=0.93**  
**cor=-0.0043, p=0.97**

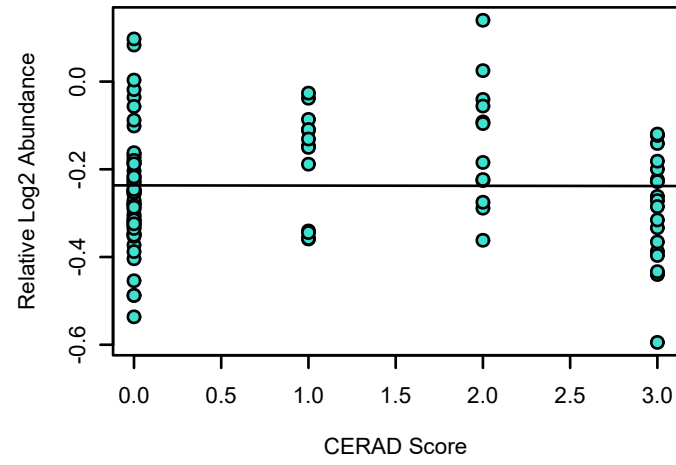

**PLXNA1 UPenn Mixed PRM**  
M1 turquoise MEGA module member  
K-W ANOVA p: 0.00017

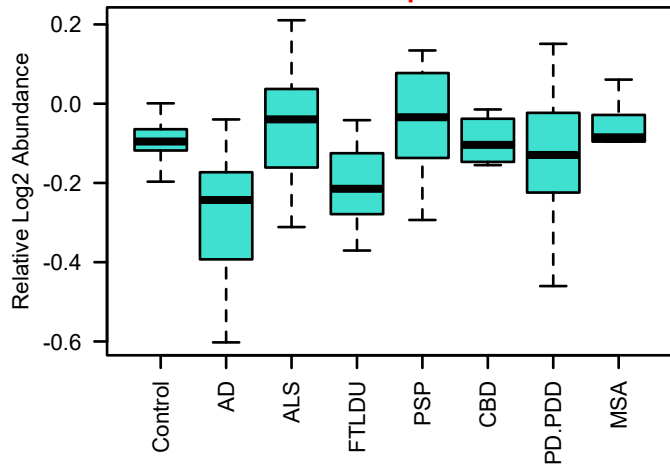

**PLXNA1 UPenn Mixed PRM**  
K-W ANOVA p: 9.6e-05

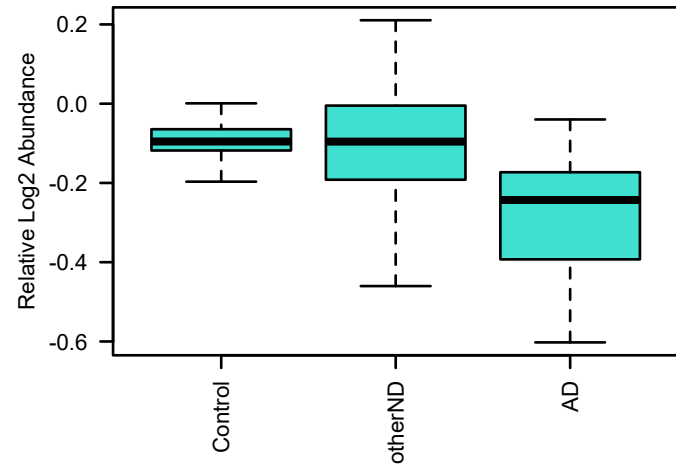

**bicor=-0.32, p=0.0027**  
**cor=-0.38, p=0.00036**

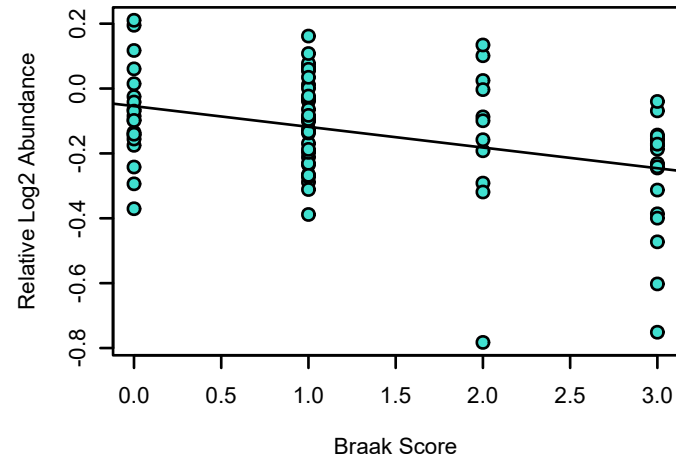

**bicor=-0.38, p=7.9e-05**  
**cor=-0.44, p=4.6e-06**

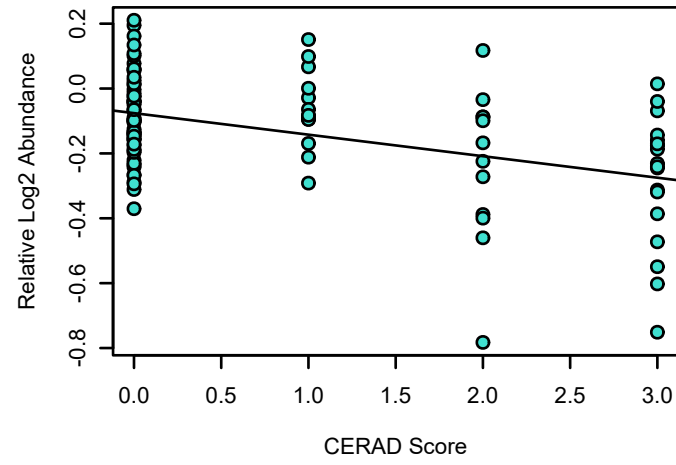

**CADPS UPenn Mixed PRM**  
M3 brown MEGA module member  
K-W ANOVA p: 0.21

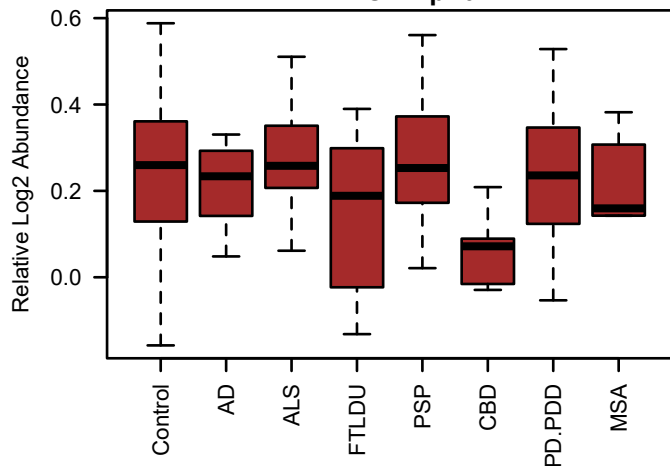

**CADPS UPenn Mixed PRM**  
K-W ANOVA p: 0.99

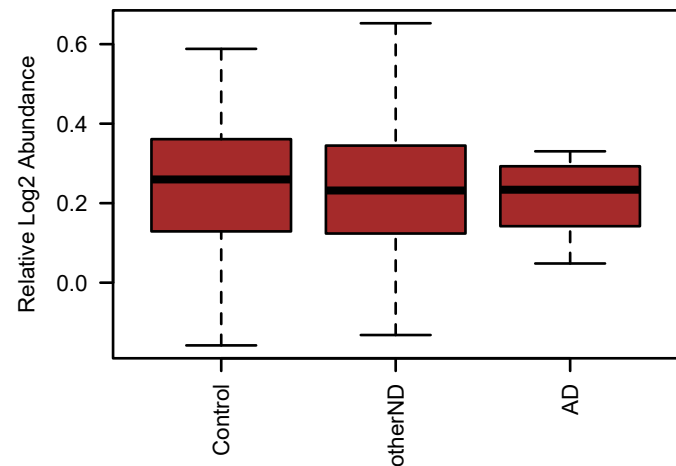

**bicor=-0.16, p=0.14**  
**cor=-0.16, p=0.15**

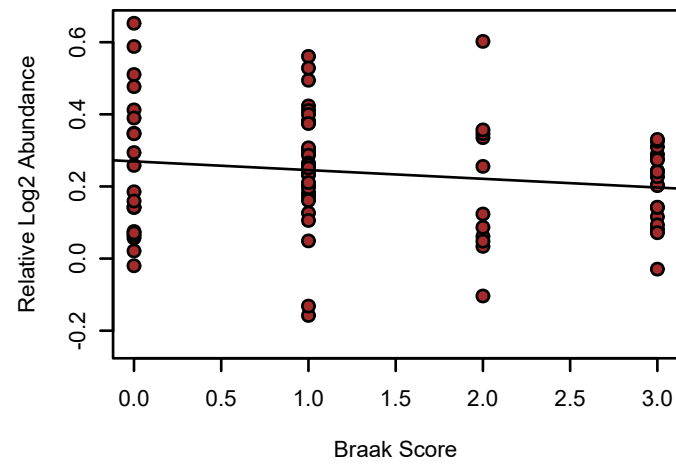

**bicor=-0.11, p=0.26**  
**cor=-0.12, p=0.23**

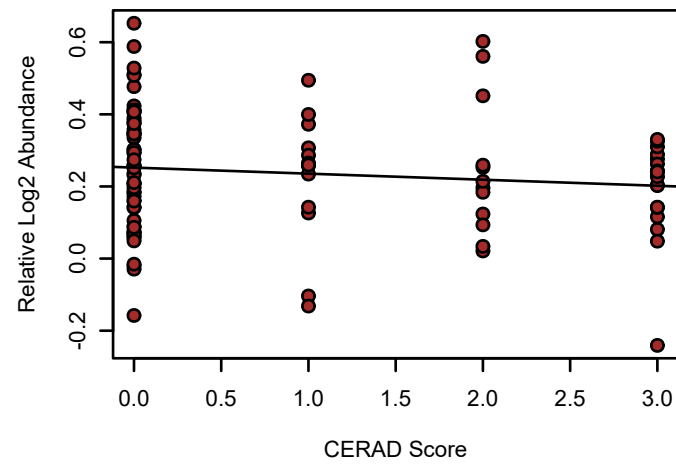

**ICAM5 UPenn Mixed PRM**  
M1 turquoise MEGA module member  
K-W ANOVA p: 0.08

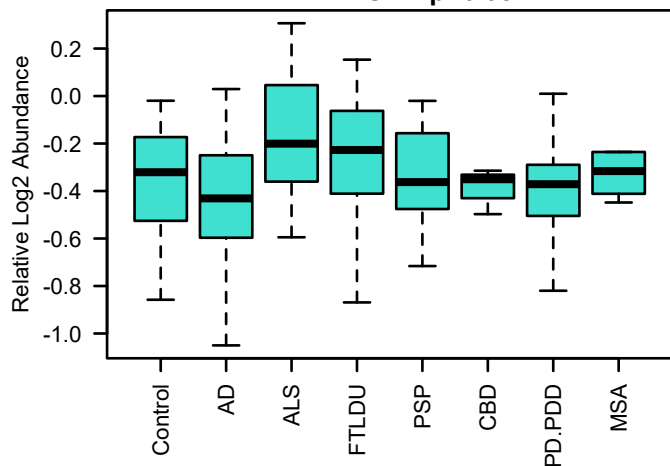

**ICAM5 UPenn Mixed PRM**  
K-W ANOVA p: 0.076

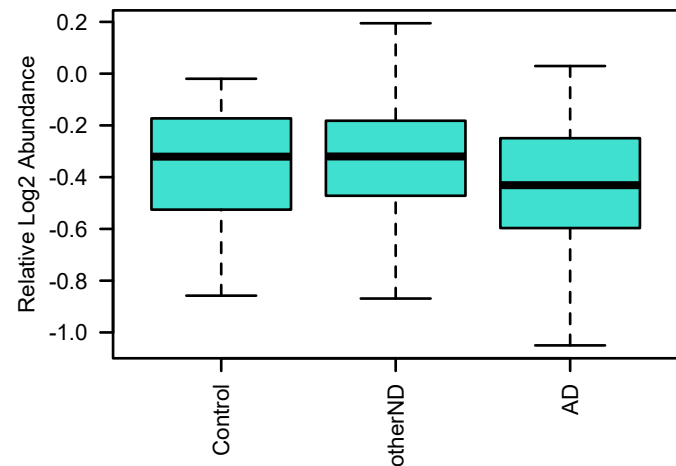

**bicor=-0.12, p=0.26**  
**cor=-0.13, p=0.24**

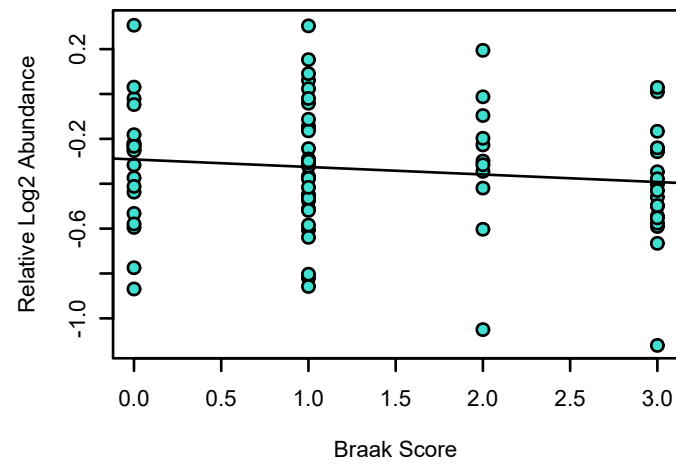

**bicor=-0.049, p=0.63**  
**cor=-0.083, p=0.41**

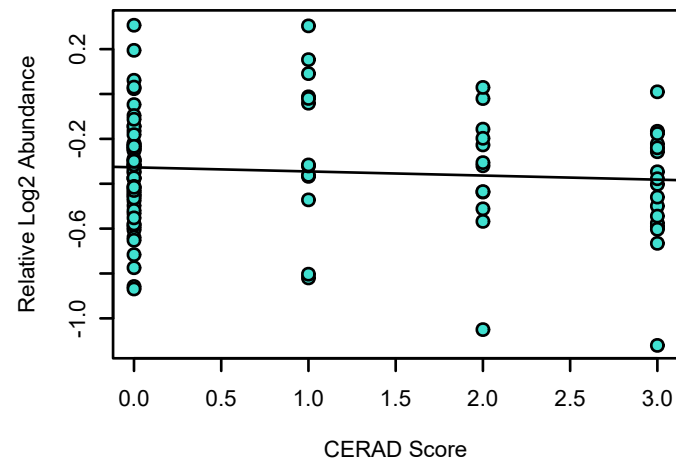

**NSFL1C UPenn Mixed PRM**  
NA grey MEGA module member  
K-W ANOVA p: 0.0013

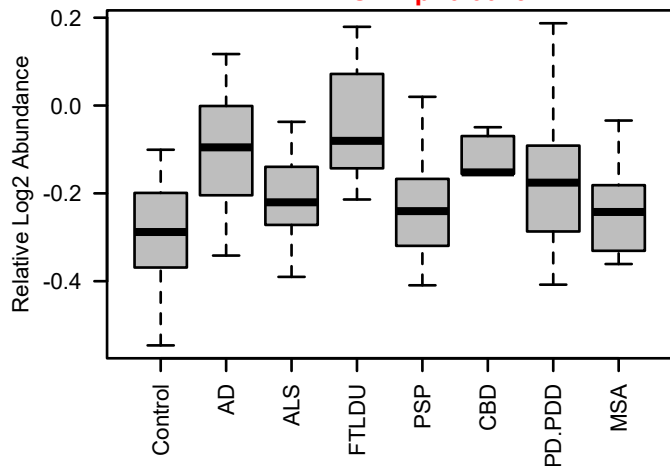

**NSFL1C UPenn Mixed PRM**  
K-W ANOVA p: 0.0022

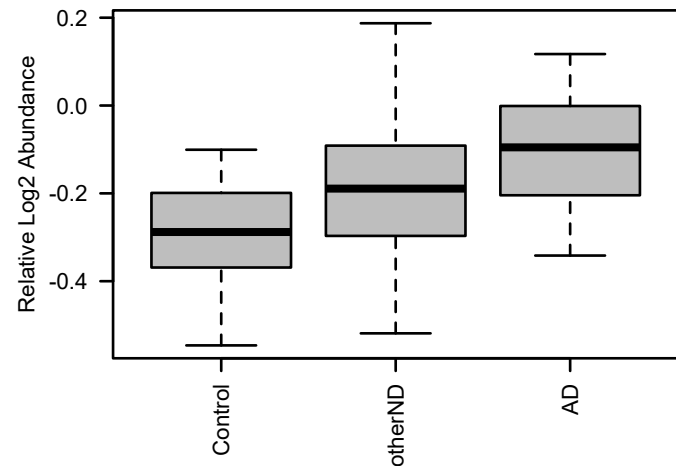

**bicor=0.31, p=0.0046**  
**cor=0.31, p=0.0041**

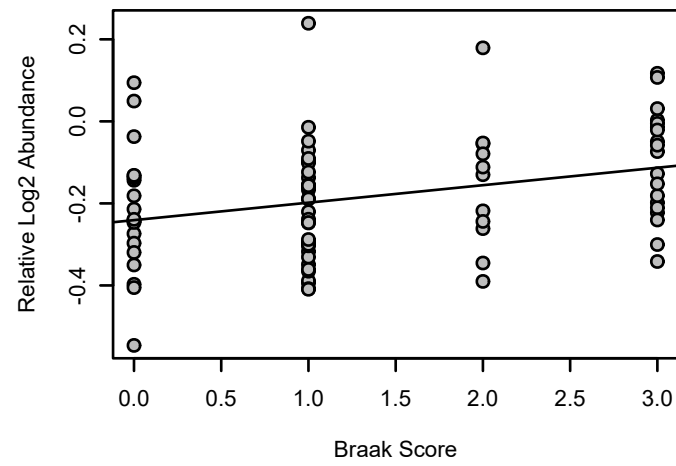

**bicor=0.24, p=0.018**  
**cor=0.23, p=0.021**

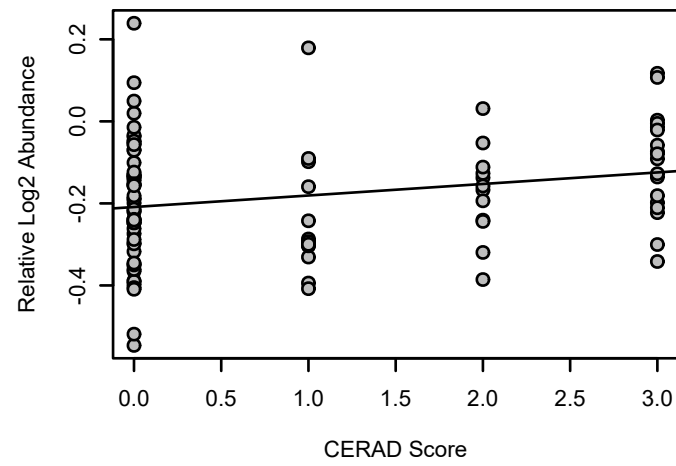

**BSN UPenn Mixed PRM**  
M1 turquoise MEGA module member  
K-W ANOVA p: 9.3e-06

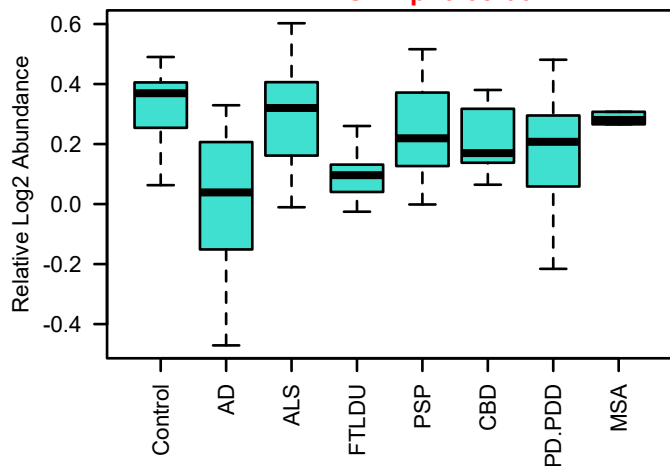

**BSN UPenn Mixed PRM**  
K-W ANOVA p: 5.9e-06

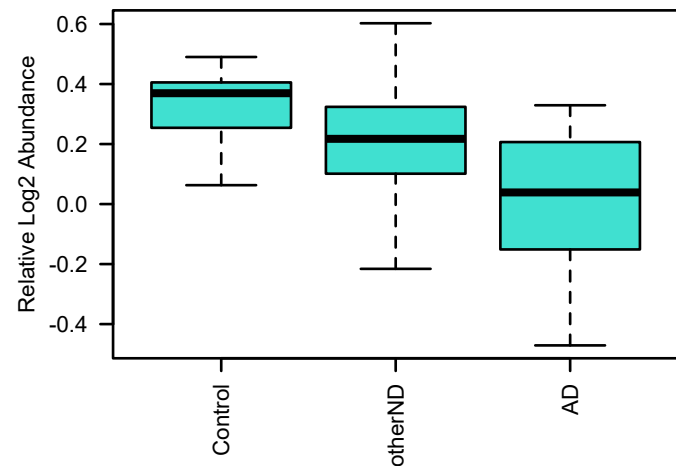

**bicor=-0.43, p=4.2e-05**  
**cor=-0.44, p=2.8e-05**

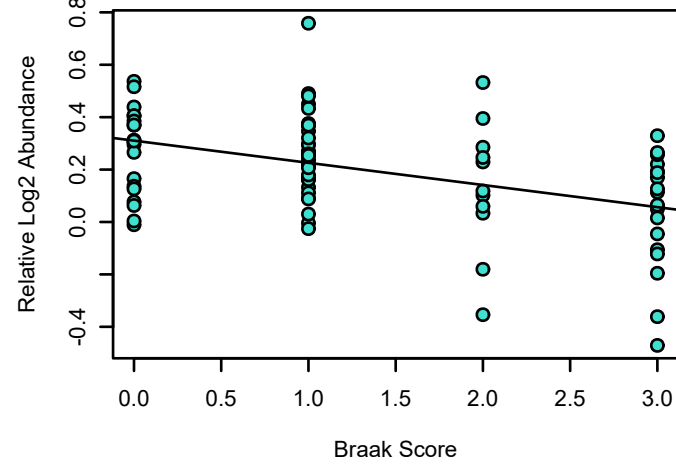

**bicor=-0.34, p=0.00055**  
**cor=-0.38, p=9.6e-05**

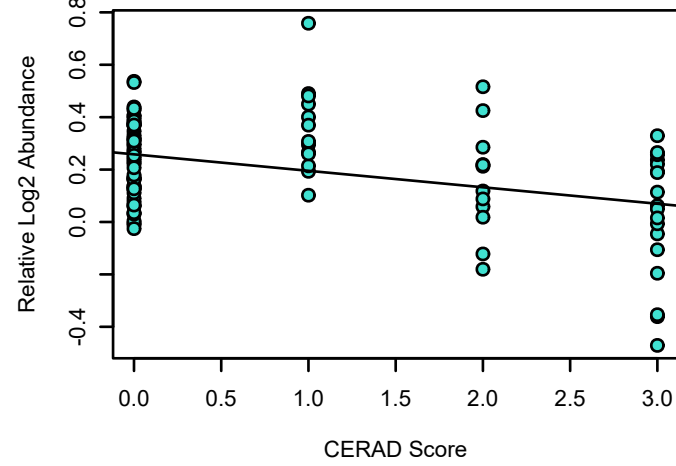

**SLC8A2 UPenn Mixed PRM**  
M1 turquoise MEGA module member  
K-W ANOVA p: 0.21

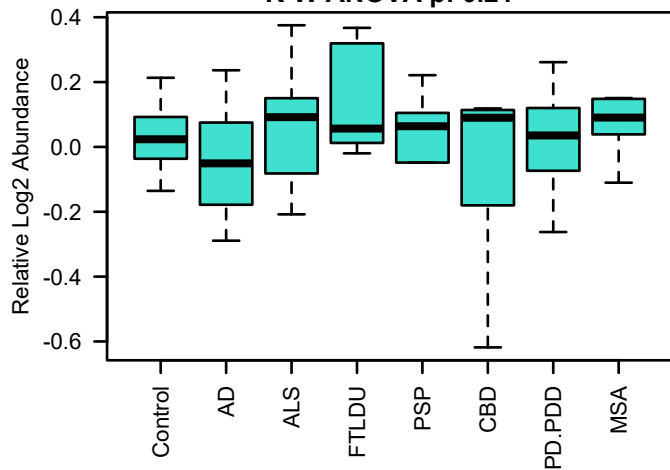

**SLC8A2 UPenn Mixed PRM**  
K-W ANOVA p: 0.21

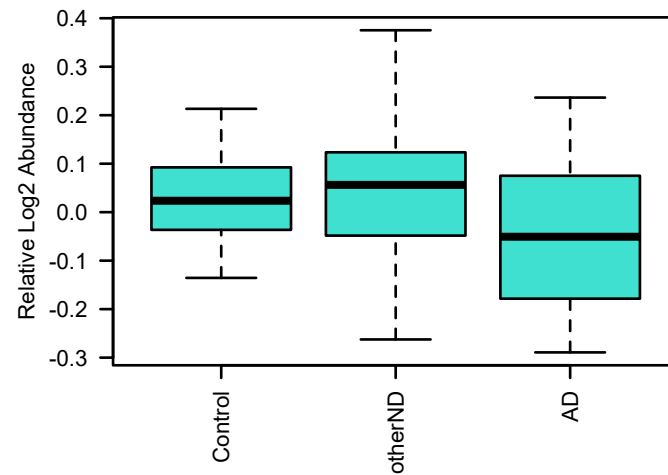

**bicor=-0.1, p=0.36**  
**cor=-0.16, p=0.15**

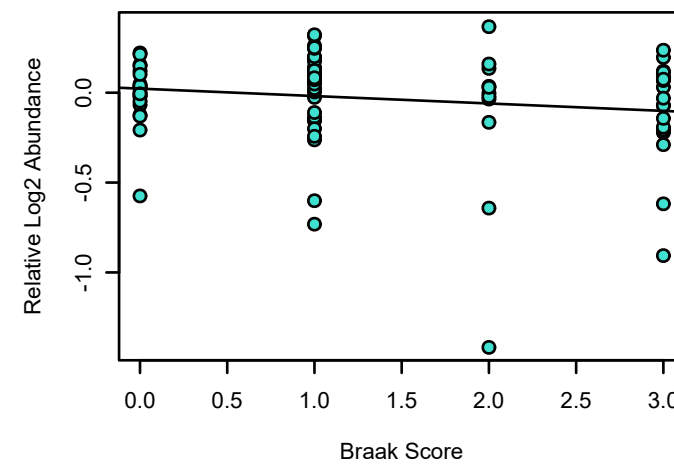

**bicor=-0.06, p=0.56**  
**cor=0.029, p=0.77**

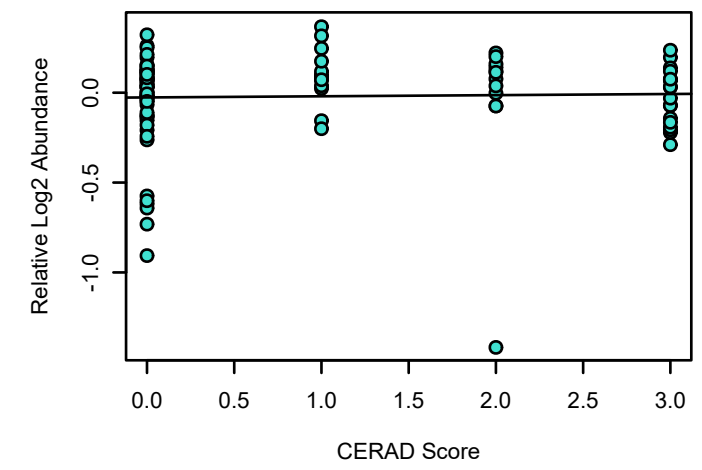

**BAIAP2 UPenn Mixed PRM**  
M1 turquoise MEGA module member  
K-W ANOVA p: 0.00039

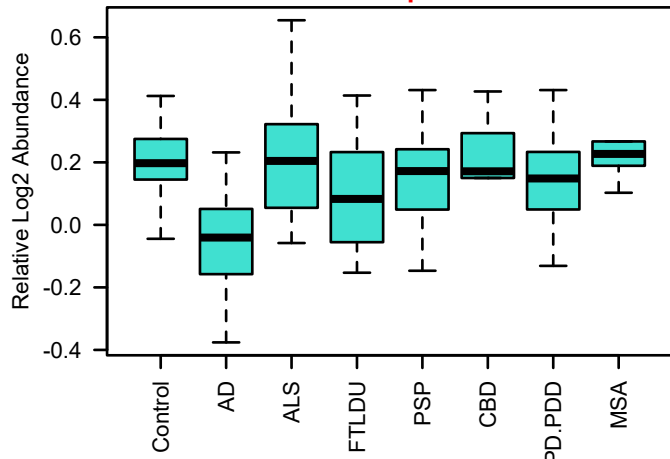

**BAIAP2 UPenn Mixed PRM**  
K-W ANOVA p: 1.2e-05

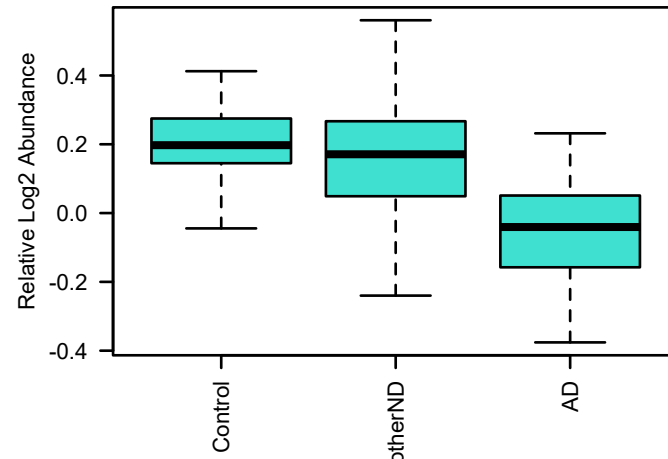

**bicor=-0.37, p=0.00058**  
**cor=-0.38, p=0.00036**

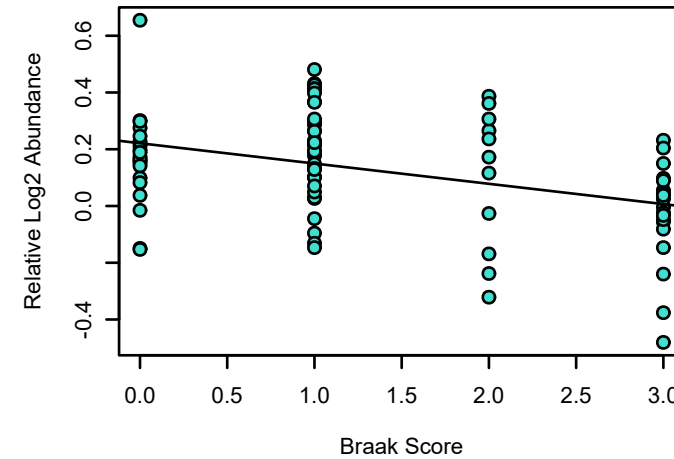

**bicor=-0.33, p=0.00072**  
**cor=-0.35, p=0.00036**

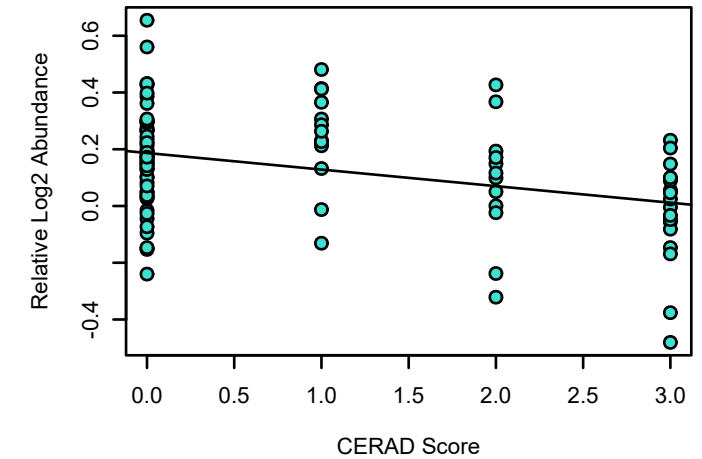

**CAMK2A UPenn Mixed PRM**  
M6 red MEGA module member  
K-W ANOVA p: 0.03

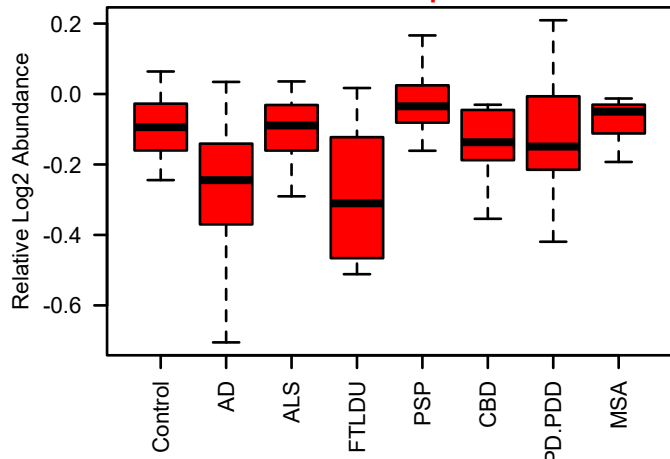

**CAMK2A UPenn Mixed PRM**  
K-W ANOVA p: 0.024

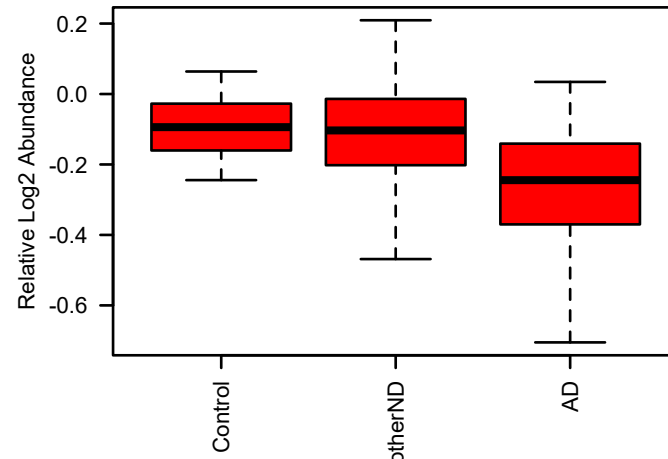

**bicor=-0.24, p=0.031**  
**cor=-0.24, p=0.028**

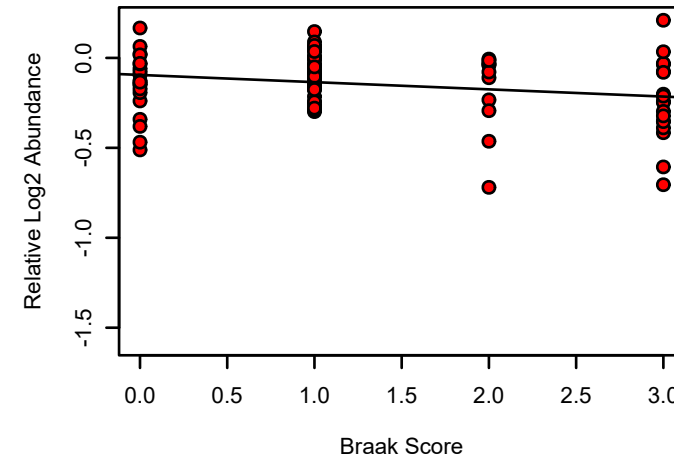

**bicor=-0.18, p=0.068**  
**cor=-0.22, p=0.028**

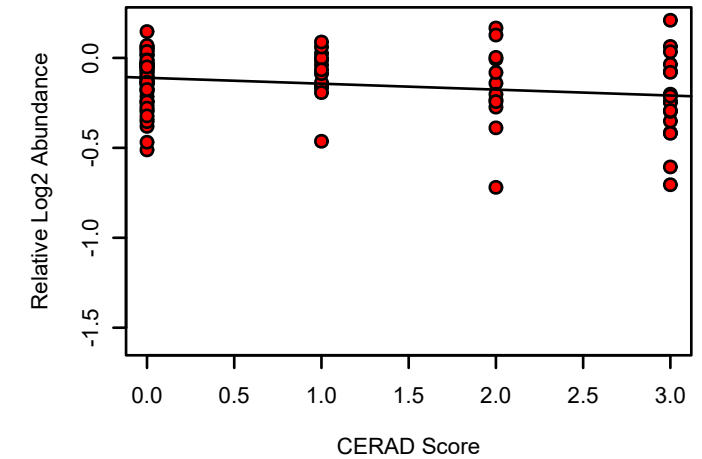

**NCKAP1 UPenn Mixed PRM**  
M1 turquoise MEGA module member  
K-W ANOVA p: 0.036

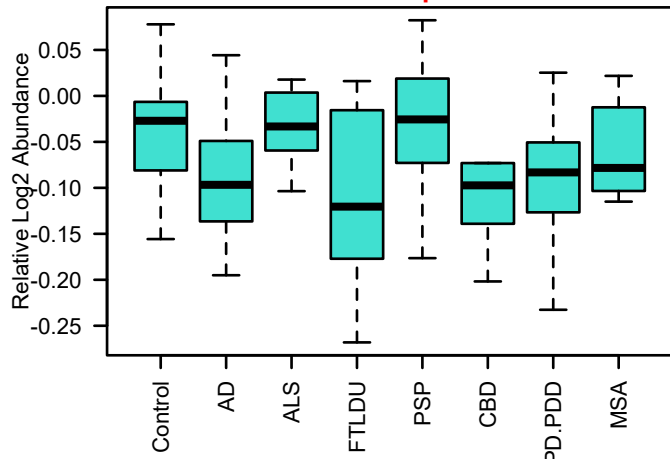

**NCKAP1 UPenn Mixed PRM**  
K-W ANOVA p: 0.32

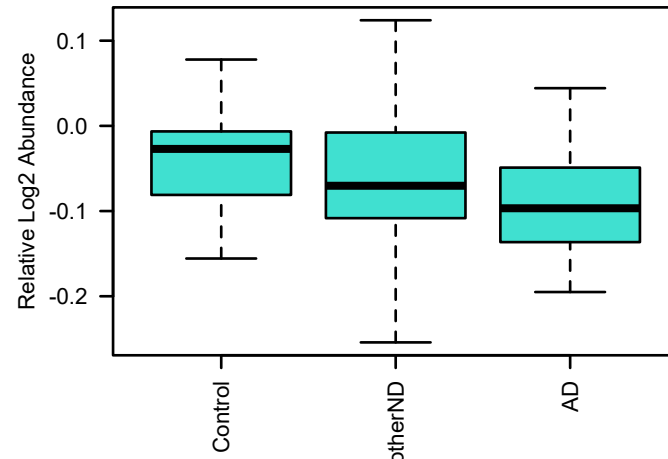

**bicor=-0.21, p=0.057**  
**cor=-0.2, p=0.068**

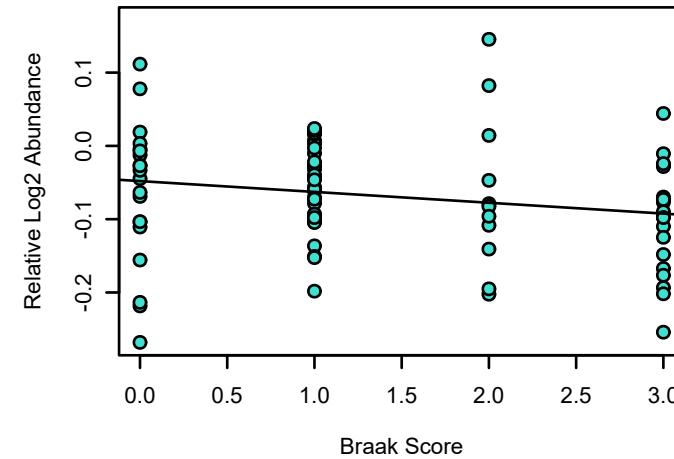

**bicor=-0.16, p=0.12**  
**cor=-0.16, p=0.11**

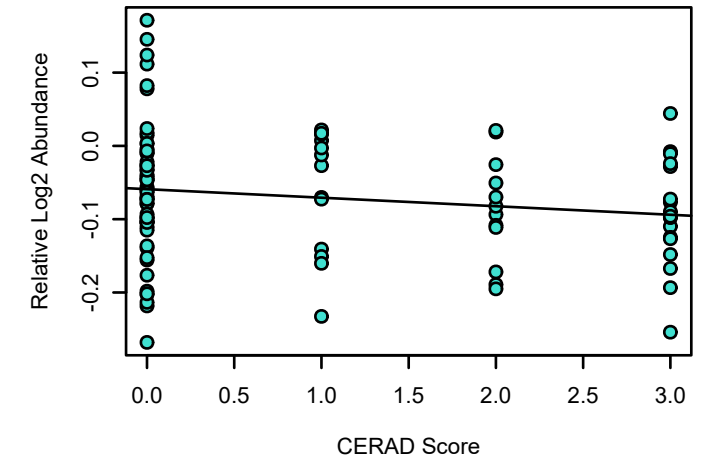



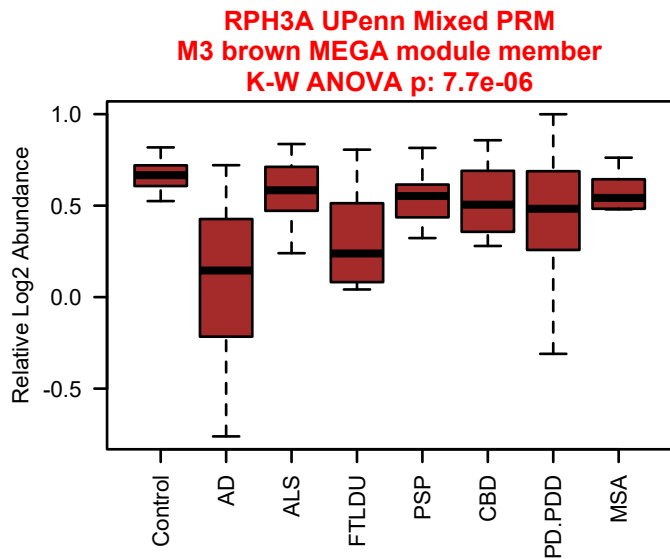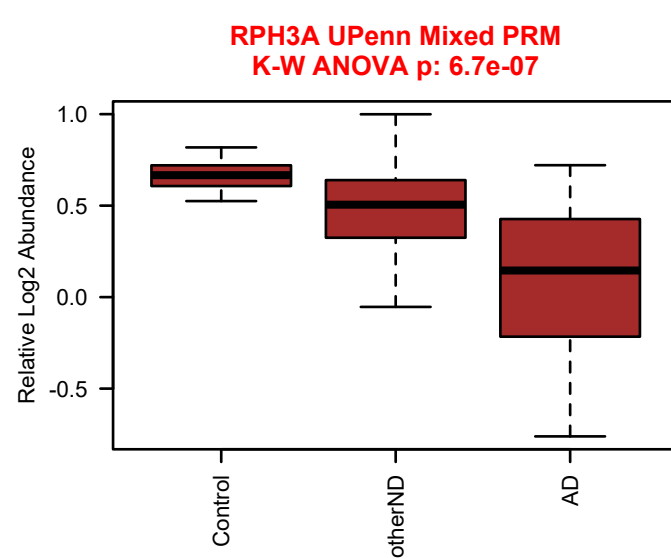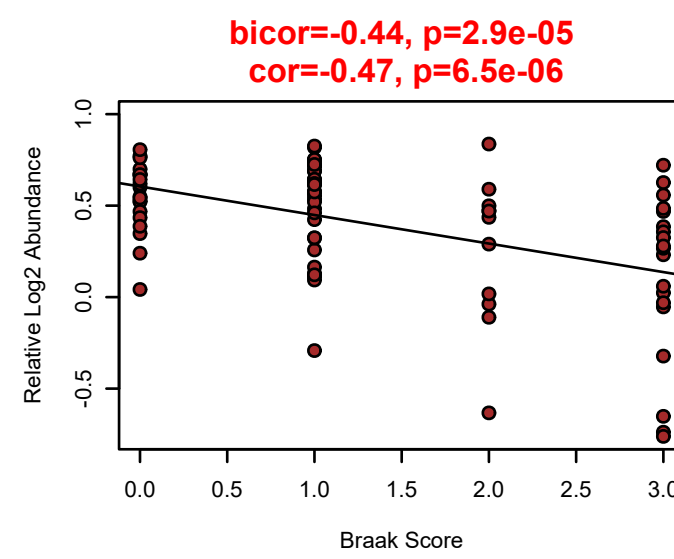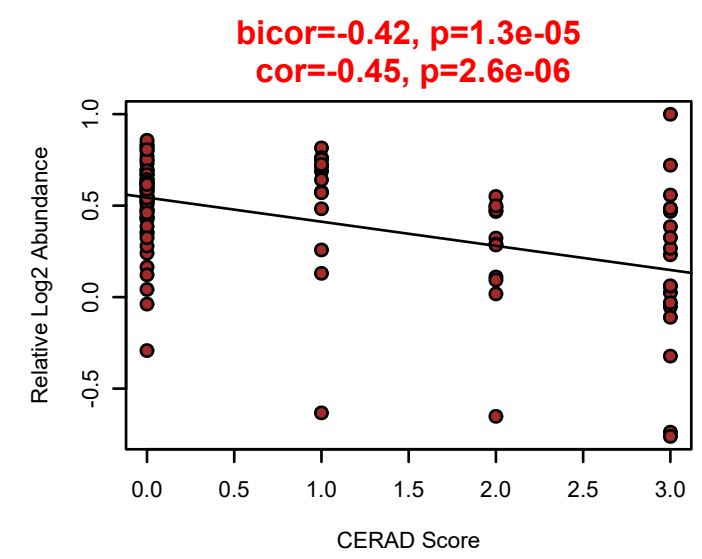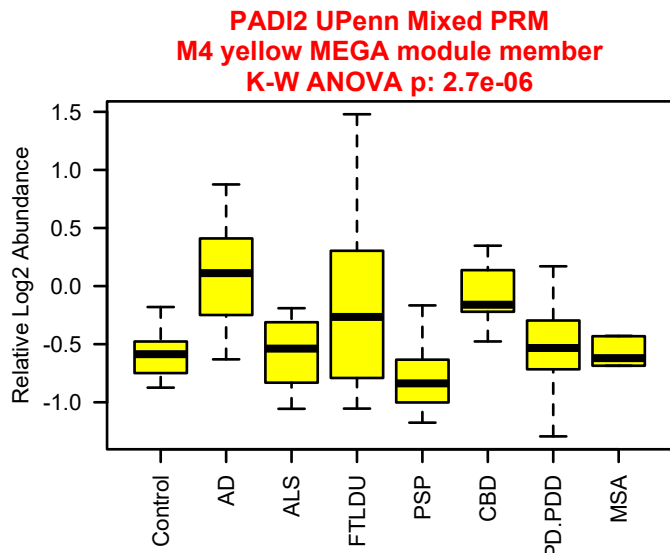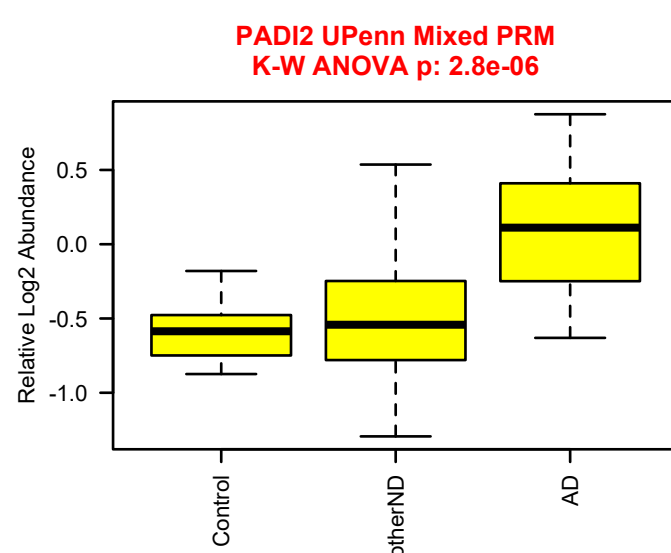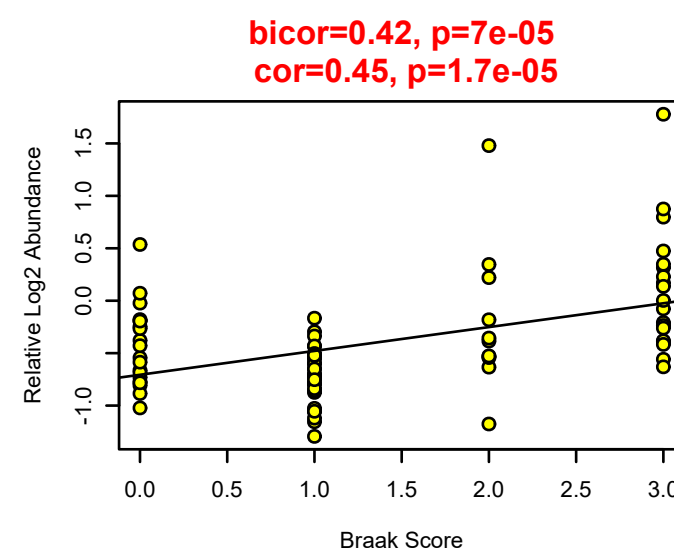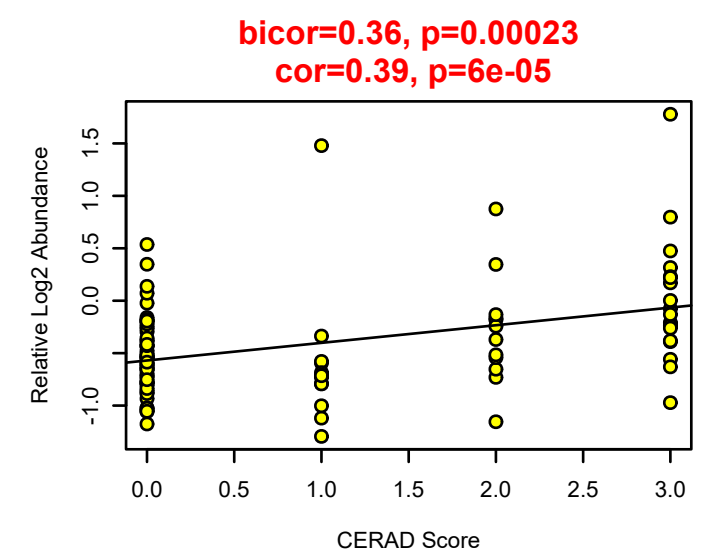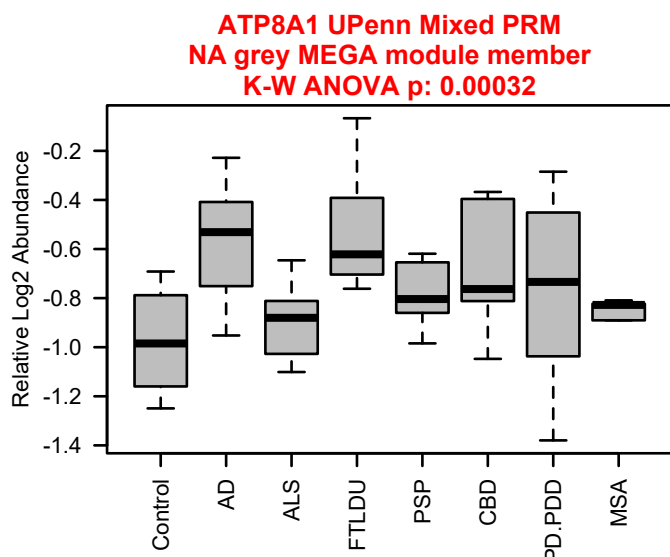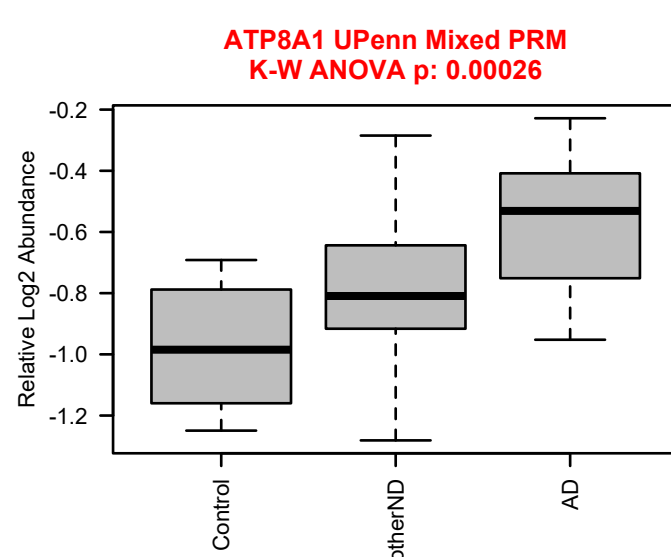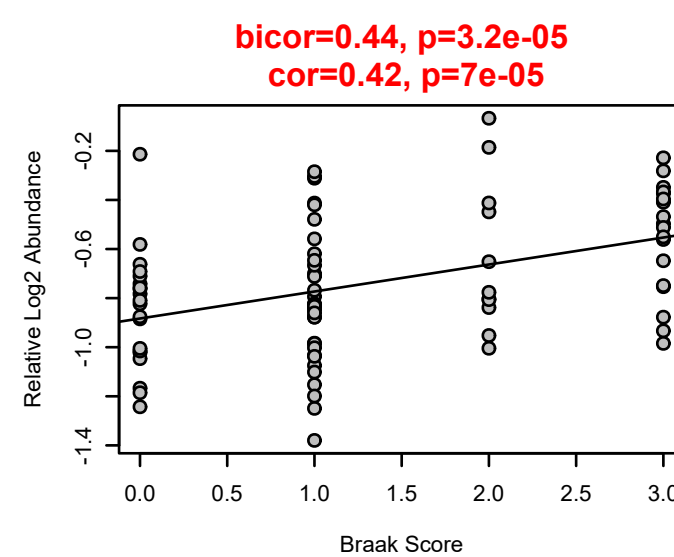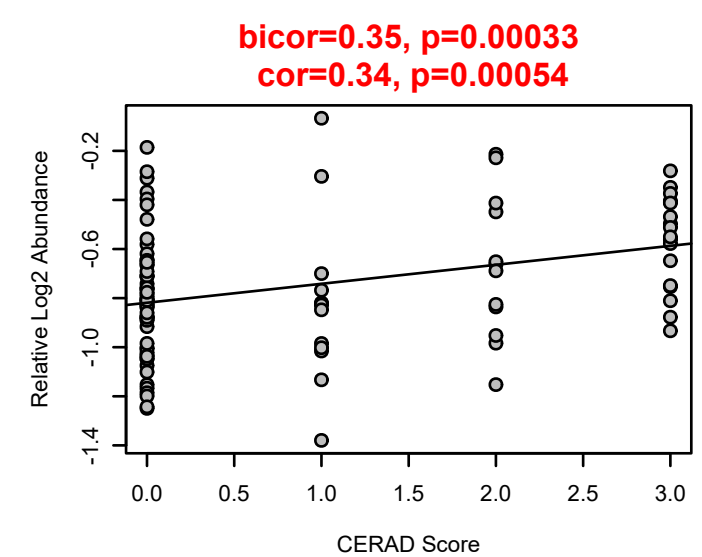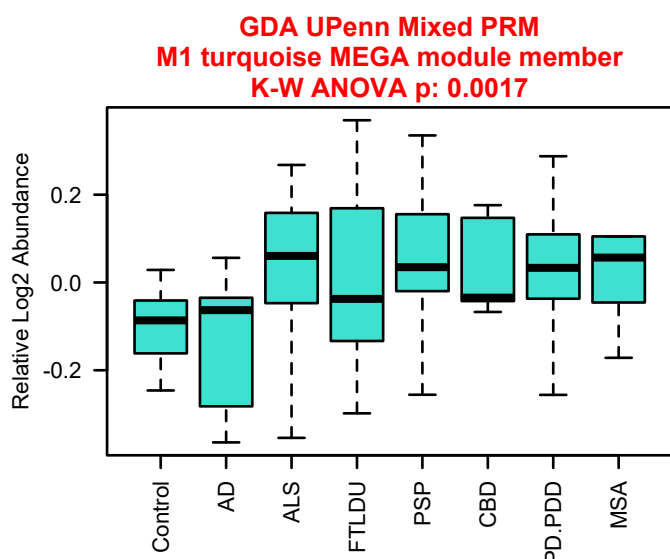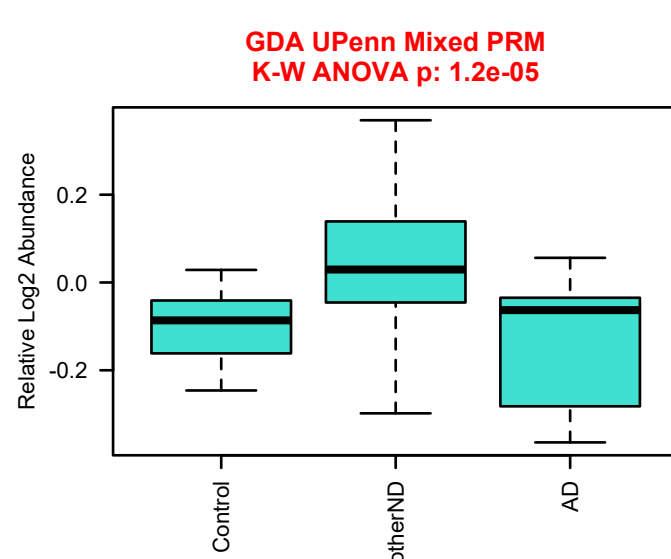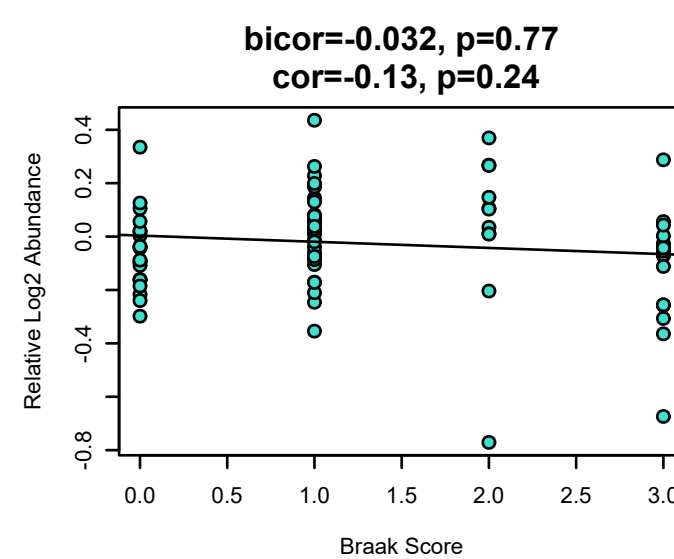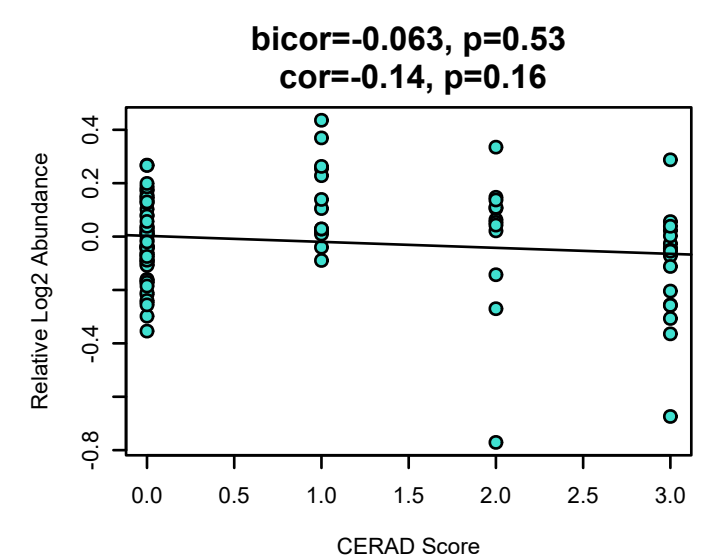

**WDR7 UPenn Mixed PRM**  
M1 turquoise MEGA module member  
K-W ANOVA p: 0.25

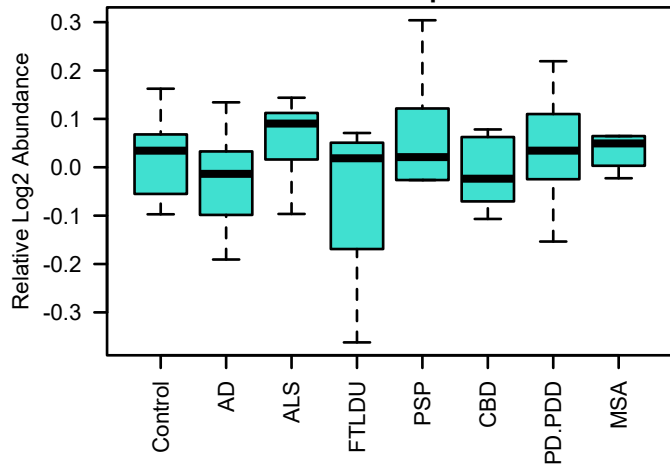

**WDR7 UPenn Mixed PRM**  
K-W ANOVA p: 0.32

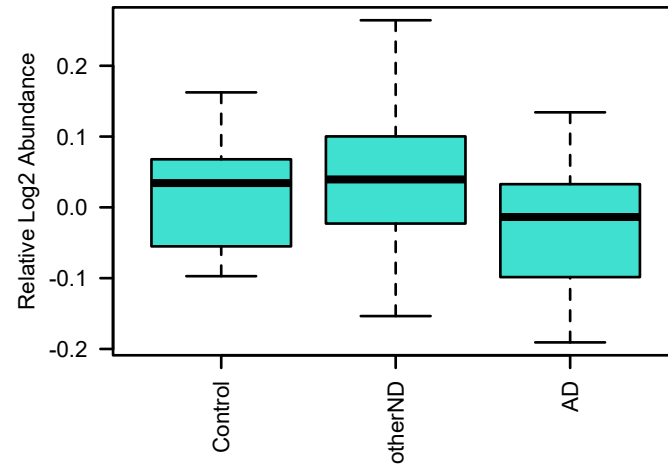

**bicor=-0.2, p=0.063**  
**cor=-0.22, p=0.044**

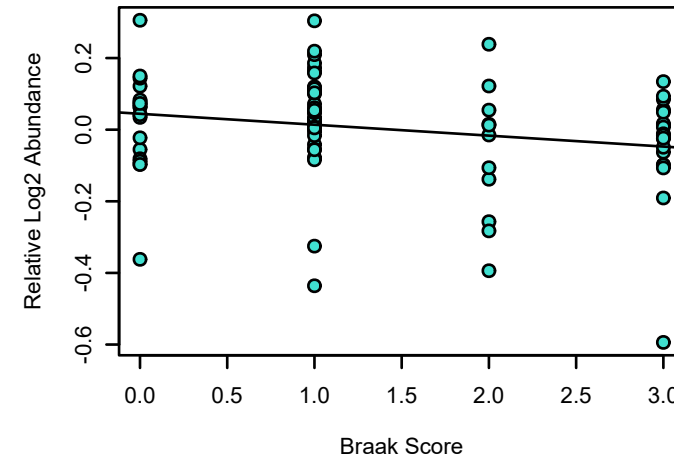

**bicor=-0.11, p=0.27**  
**cor=-0.021, p=0.84**

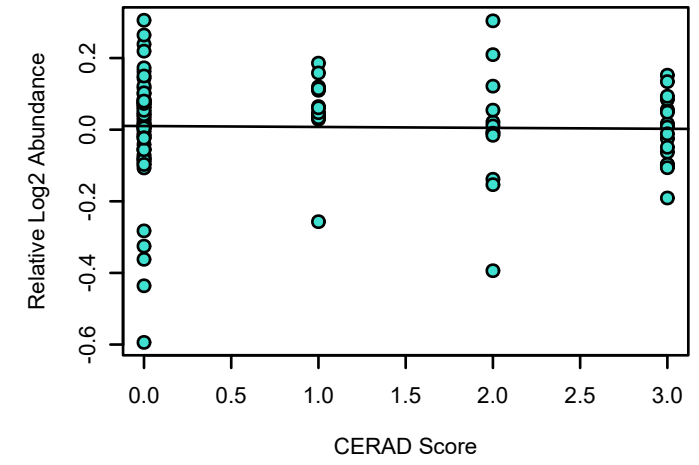

**AFG3L2 UPenn Mixed PRM**  
M3 brown MEGA module member  
K-W ANOVA p: 0.5

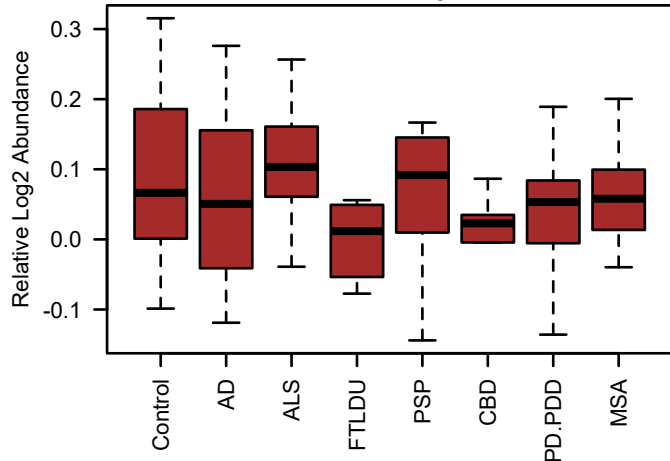

**AFG3L2 UPenn Mixed PRM**  
K-W ANOVA p: 0.52

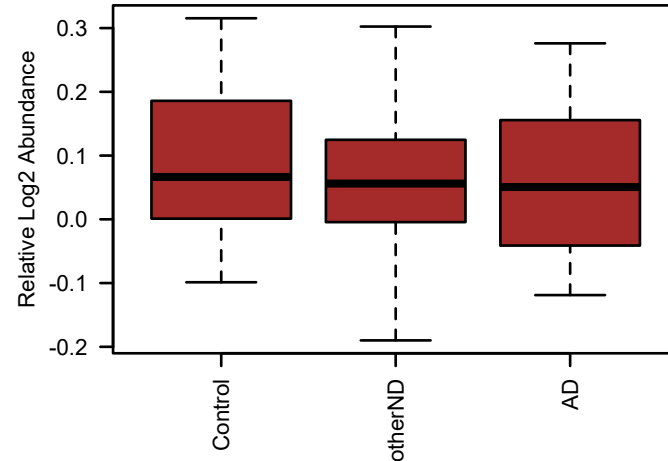

**bicor=-0.16, p=0.14**  
**cor=-0.2, p=0.068**

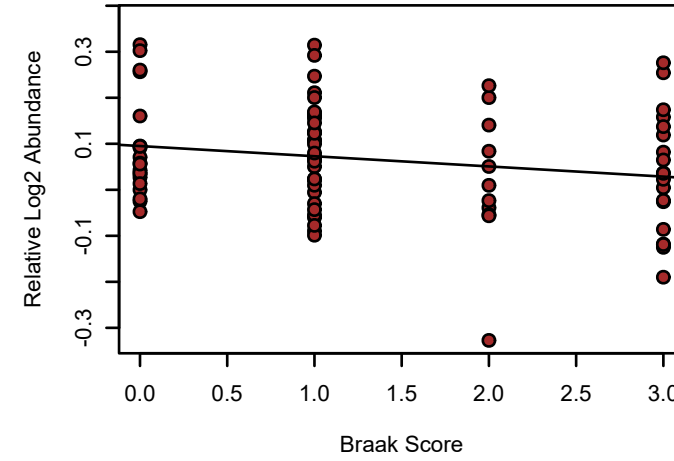

**bicor=-0.11, p=0.29**  
**cor=-0.11, p=0.28**

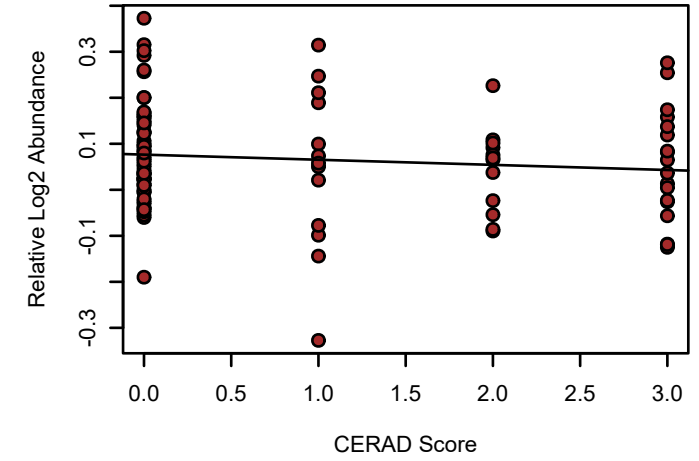

**S100A6 UPenn Mixed PRM**  
NA grey MEGA module member  
K-W ANOVA p: 2.4e-07

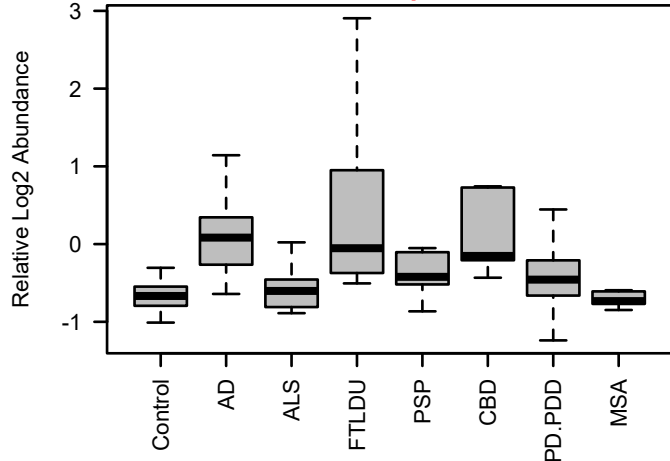

**S100A6 UPenn Mixed PRM**  
K-W ANOVA p: 0.00041

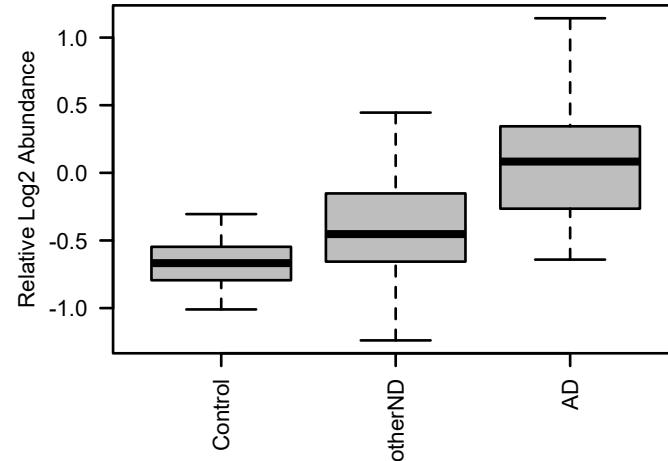

**bicor=0.55, p=5e-08**  
**cor=0.44, p=2.8e-05**

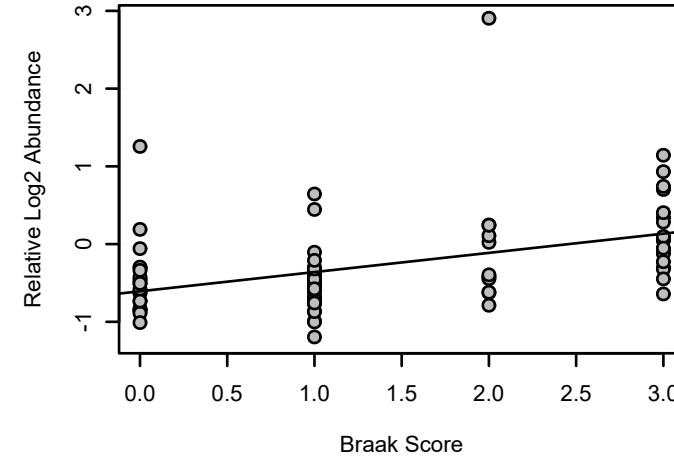

**bicor=0.38, p=8.3e-05**  
**cor=0.28, p=0.0048**

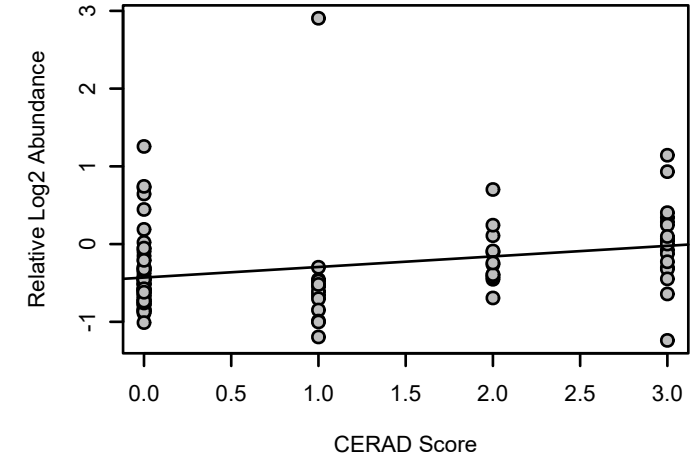

**SH3GLB2 UPenn Mixed PRM**  
M1 turquoise MEGA module member  
K-W ANOVA p: 0.0021

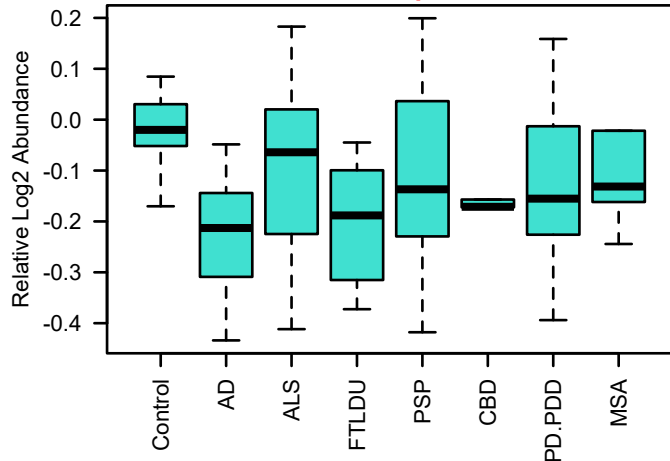

**SH3GLB2 UPenn Mixed PRM**  
K-W ANOVA p: 0.00059

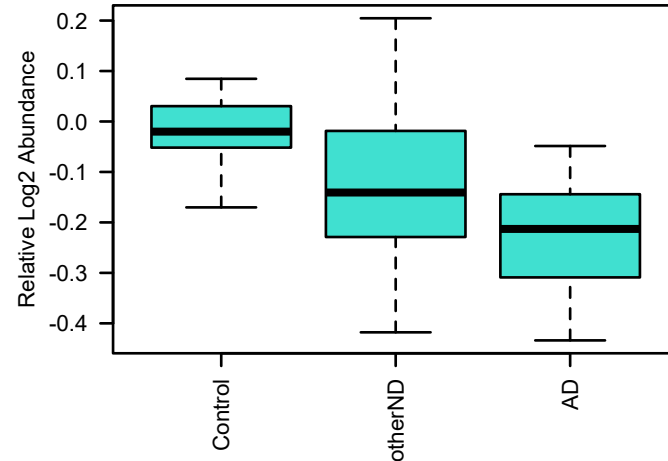

**bicor=-0.29, p=0.0067**  
**cor=-0.28, p=0.0099**

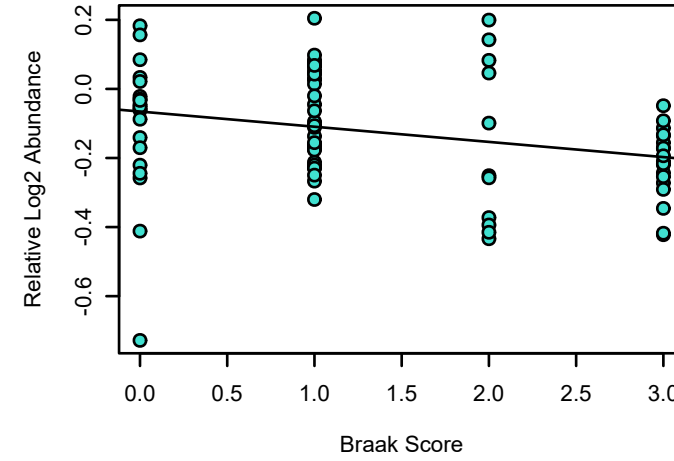

**bicor=-0.25, p=0.011**  
**cor=-0.22, p=0.028**

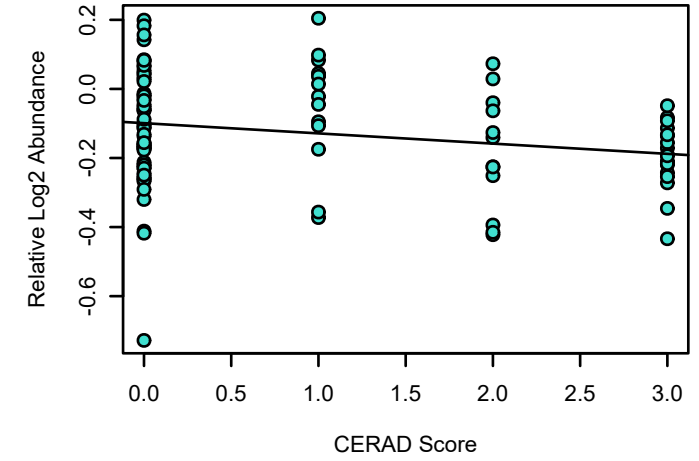

**GLOD4 UPenn Mixed PRM**  
**M4 yellow MEGA module member**  
**K-W ANOVA p: 0.22**

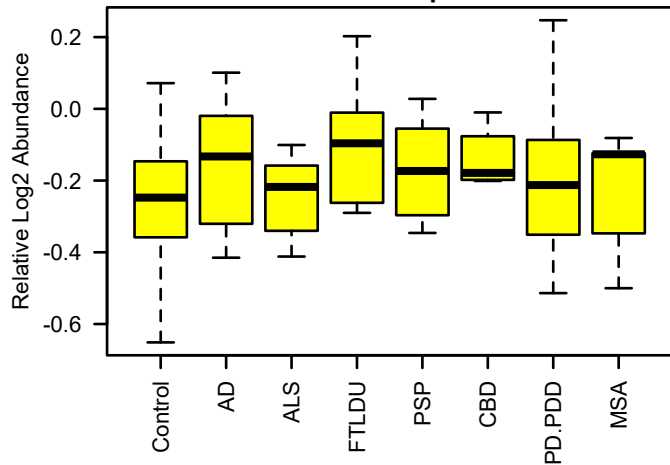

**GLOD4 UPenn Mixed PRM**  
**K-W ANOVA p: 0.14**

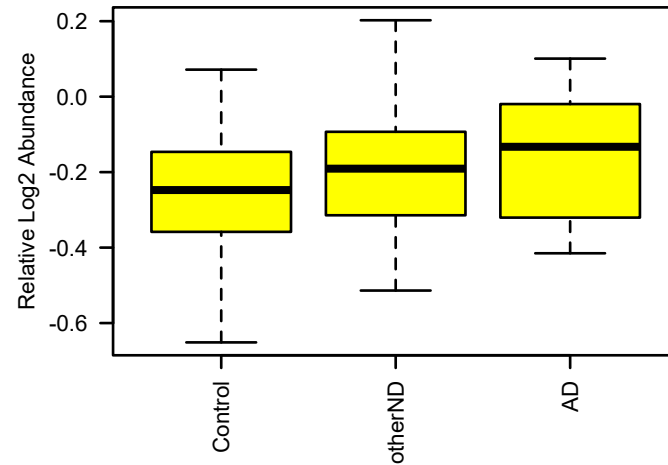

**bicor=0.059, p=0.59**  
**cor=0.081, p=0.46**

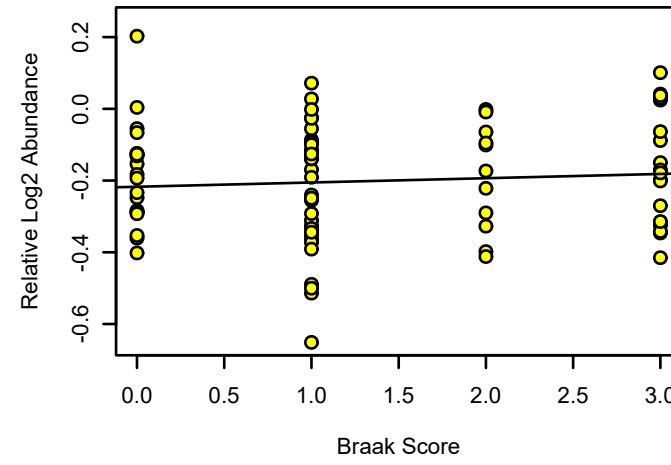

**bicor=0.09, p=0.37**  
**cor=0.096, p=0.34**

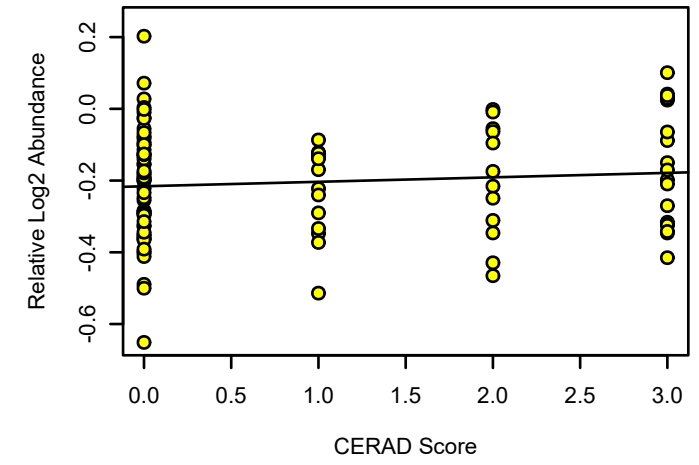

**LCMT1 UPenn Mixed PRM**  
**NA grey MEGA module member**  
**K-W ANOVA p: 0.0021**

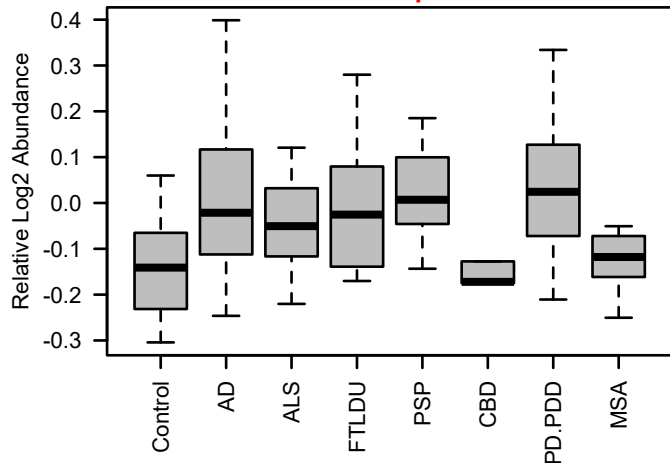

**LCMT1 UPenn Mixed PRM**  
**K-W ANOVA p: 0.0057**

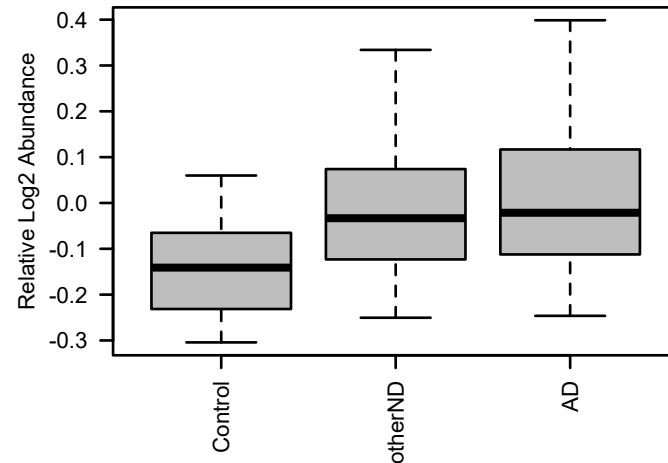

**bicor=0.19, p=0.088**  
**cor=0.14, p=0.2**

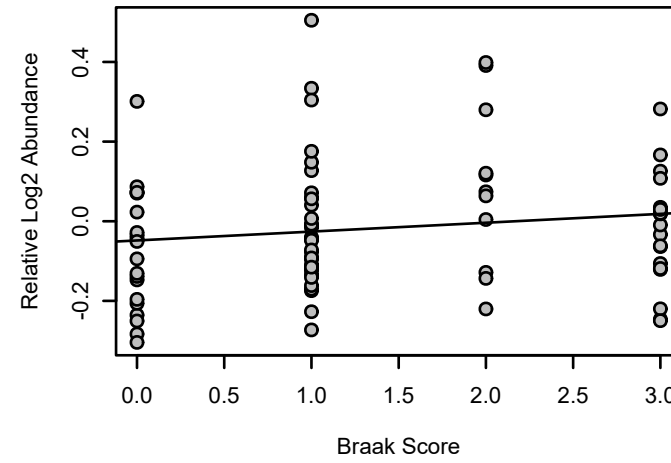

**bicor=0.17, p=0.09**  
**cor=0.17, p=0.091**

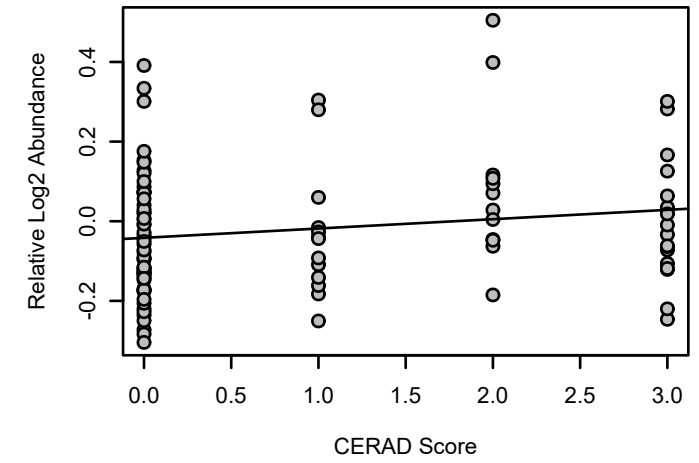

**CADM1 UPenn Mixed PRM**  
**M1 turquoise MEGA module member**  
**K-W ANOVA p: 0.08**

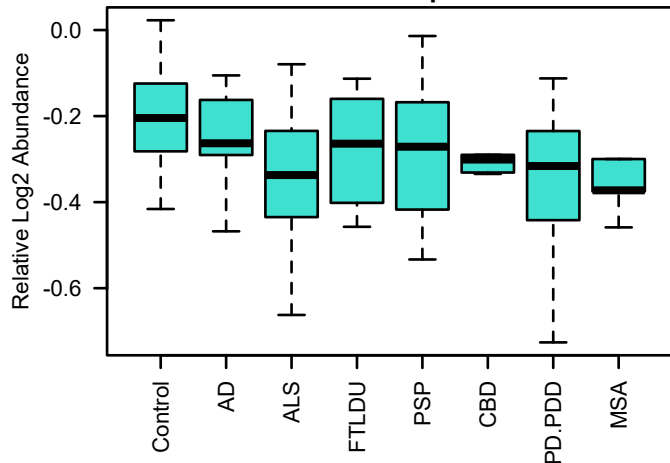

**CADM1 UPenn Mixed PRM**  
**K-W ANOVA p: 0.0049**

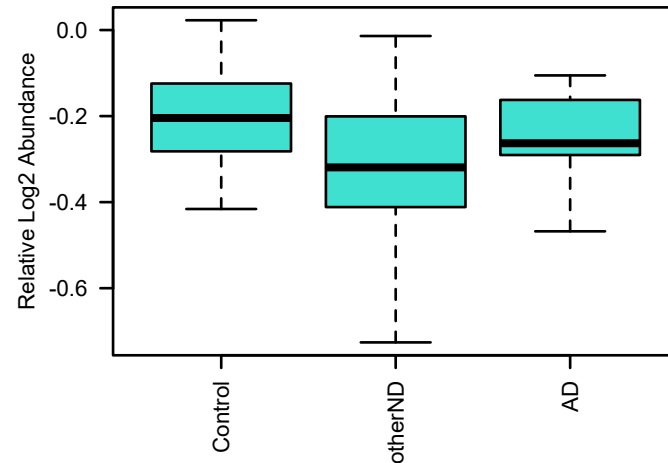

**bicor=-0.11, p=0.32**  
**cor=-0.13, p=0.24**

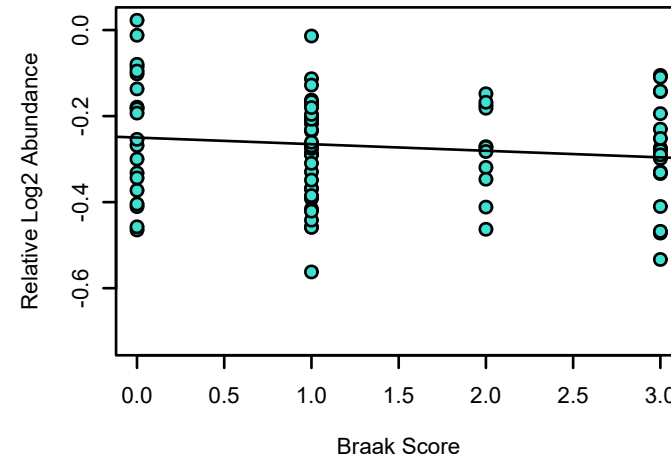

**bicor=0.035, p=0.73**  
**cor=0.039, p=0.7**

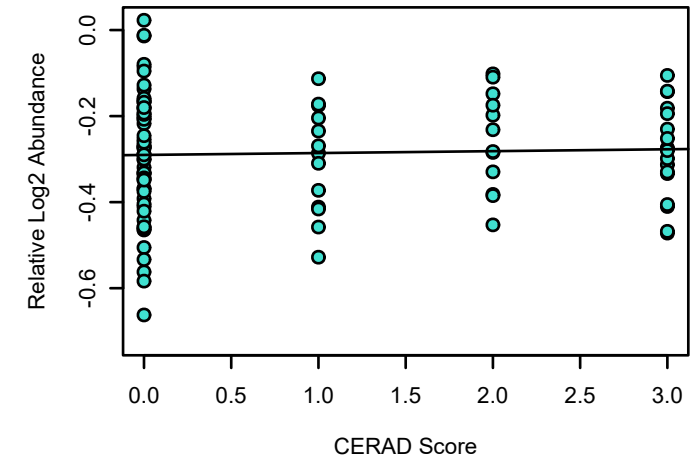

**Supplementary Figure 11. Targeted Individual Protein Measurements in Other Neurodegenerative Diseases.** Peptides from proteins across all modules in the AD network were targeted for measurement by parallel reaction monitoring mass spectrometry (PRM) in a subset of cases in the UPenn cohort encompassing all disease groups ( $n=108$  independent case samples; control  $n=15$ , AD  $n=16$ , amyotrophic lateral sclerosis (ALS)  $n=16$ , frontotemporal lobar degeneration with TAR DNA-binding protein 43 inclusions (FTLD-TDP)  $n=8$ , progressive supranuclear palsy (PSP)  $n=13$ , corticobasal degeneration (CBD)  $n=5$ , Parkinson's disease and Parkinson's disease dementia (PD/PDD)  $n=30$ , and multiple system atrophy (MSA)  $n=5$ ). Other neurodegenerative diseases (otherND) include these non-AD diseases. Protein levels were correlated with CERAD and Braak scores, using both Pearson correlation (cor) and biweight midcorrelation (bicor), which is more robust to outliers. Protein level differences by case status were assessed by Kruskal-Wallis (K-W) one-way ANOVA. Differences between AD and other case groups were assessed by two-sided Dunnett's test and are provided in **Supplementary Table 4**. Data for each protein is colored by the AD network module in which it resides. Statistical significance at  $p < 0.05$  is highlighted in red. Boxplots represent the median, 25<sup>th</sup>, and 75<sup>th</sup> percentiles, and whiskers represent measurements to the 5<sup>th</sup> and 95<sup>th</sup> percentiles.

**M10 purple.Consensus**

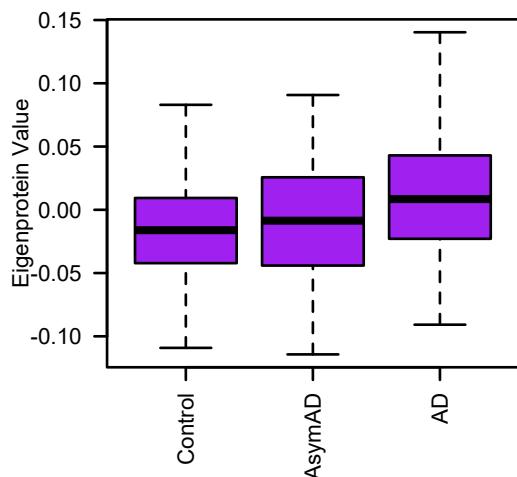

**M10 purple.UPenn Mixed PRM (Synthetic Eigenprotein)**  
K-W ANOVA p: 9.5e-05

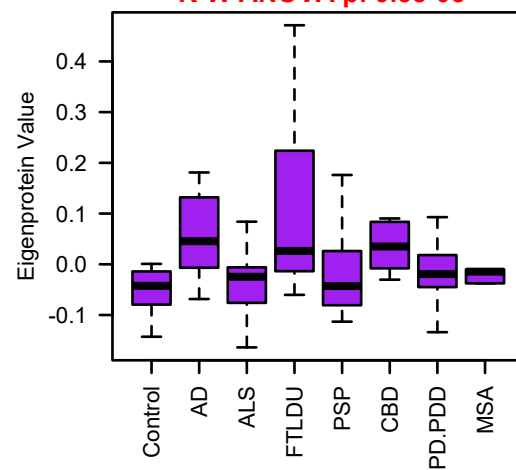

**M10 purple.UPenn Mixed PRM (Synthetic Eigenprotein)**  
K-W ANOVA p: 0.002

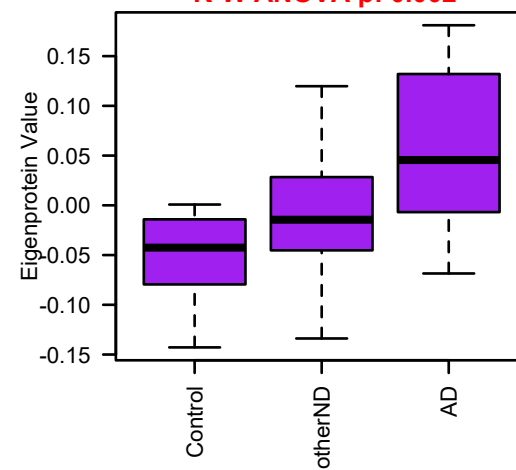

**bicor=0.36, p=0.00091**  
**cor=0.33, p=0.0022**

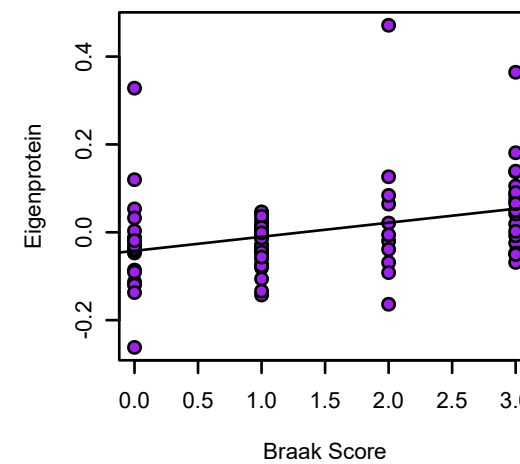

**bicor=0.24, p=0.018**  
**cor=0.24, p=0.016**

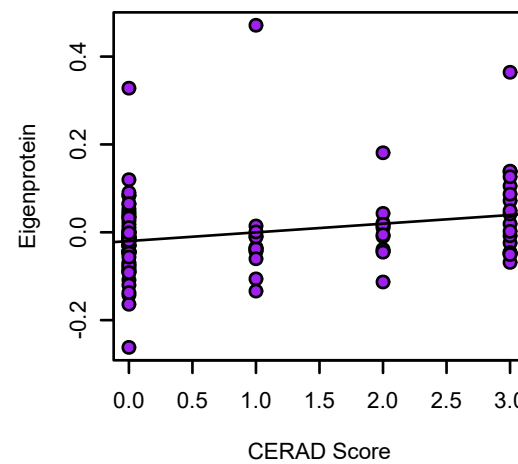

**M2 blue.Consensus**

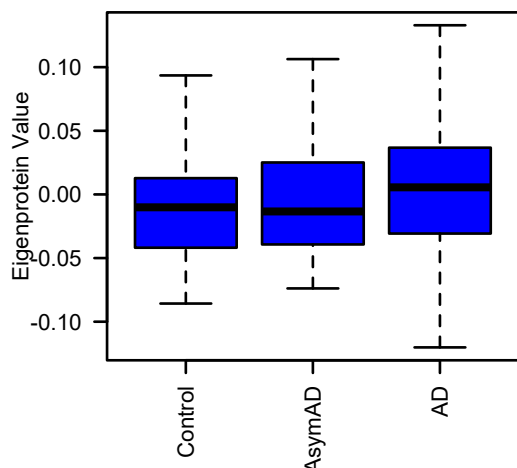

**M2 blue.UPenn Mixed PRM (Synthetic Eigenprotein)**  
K-W ANOVA p: 0.022

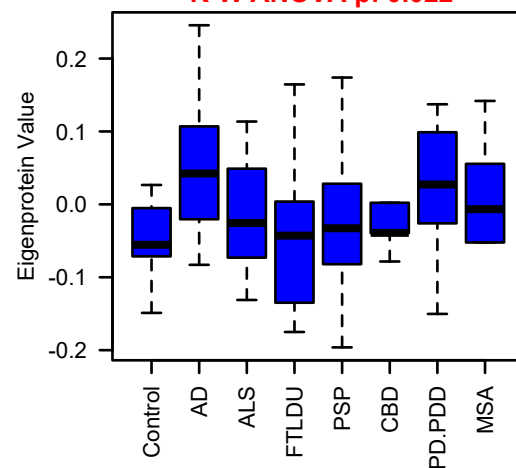

**M2 blue.UPenn Mixed PRM (Synthetic Eigenprotein)**  
K-W ANOVA p: 0.0075

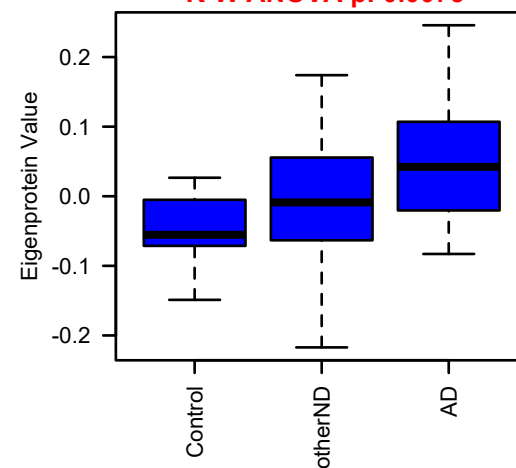

**bicor=0.3, p=0.0054**  
**cor=0.31, p=0.0041**

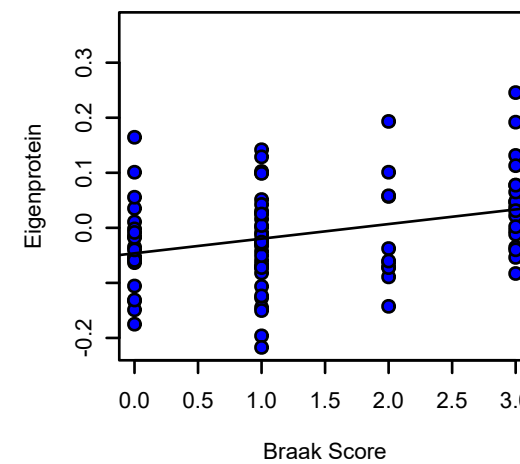

**bicor=0.24, p=0.015**  
**cor=0.25, p=0.012**

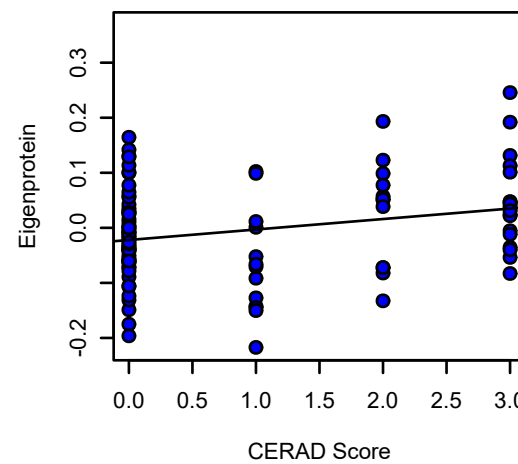

**M4 yellow.Consensus**

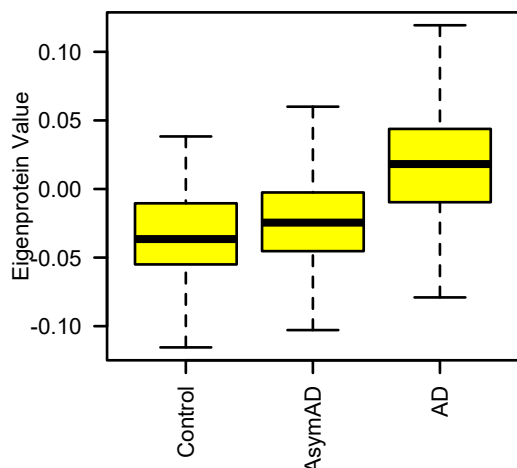

**M4 yellow.UPenn Mixed PRM (Synthetic Eigenprotein)**  
K-W ANOVA p: 6.7e-08

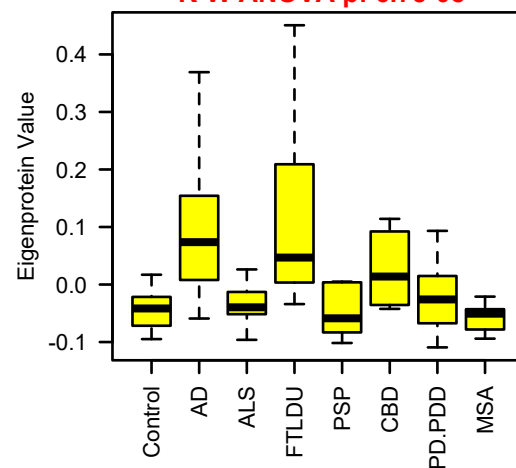

**M4 yellow.UPenn Mixed PRM (Synthetic Eigenprotein)**  
K-W ANOVA p: 1.3e-05

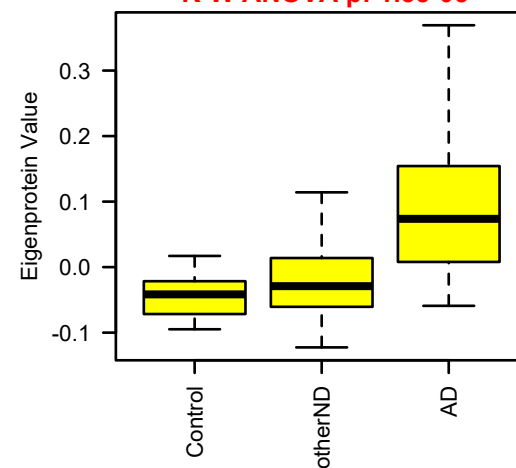

**bicor=0.46, p=1e-05**  
**cor=0.41, p=0.00011**

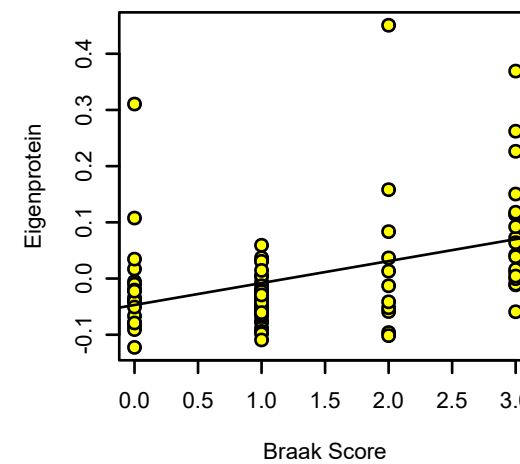

**bicor=0.36, p=2e-04**  
**cor=0.35, p=0.00036**

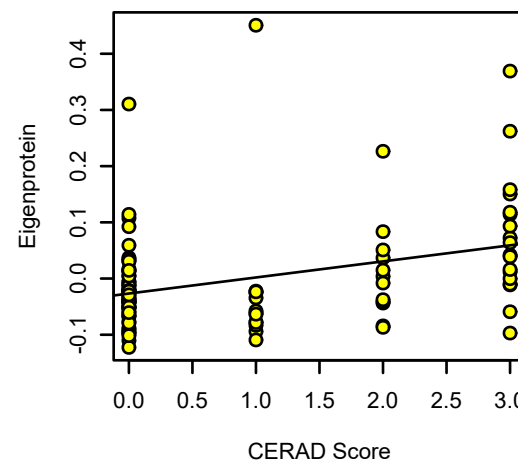

**M11 greenyellow.Consensus**

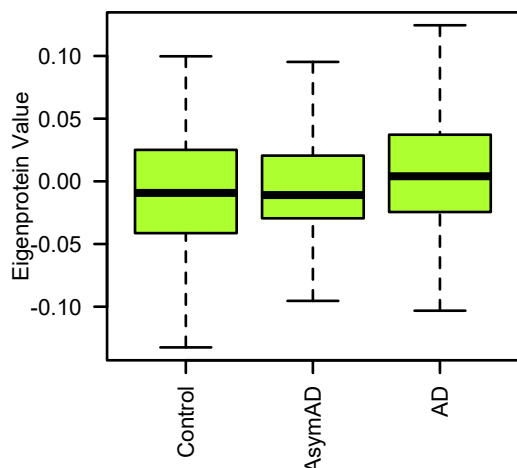

**M11 greenyellow.UPenn Mixed PRM (Synthetic Eigenprotein)**  
K-W ANOVA p: 0.29

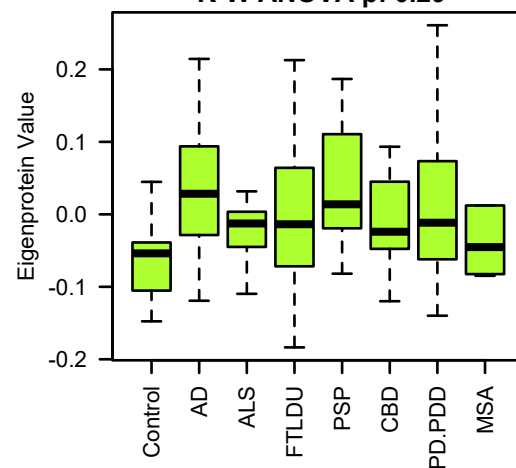

**M11 greenyellow.UPenn Mixed PRM (Synthetic Eigenprotein)**  
K-W ANOVA p: 0.029

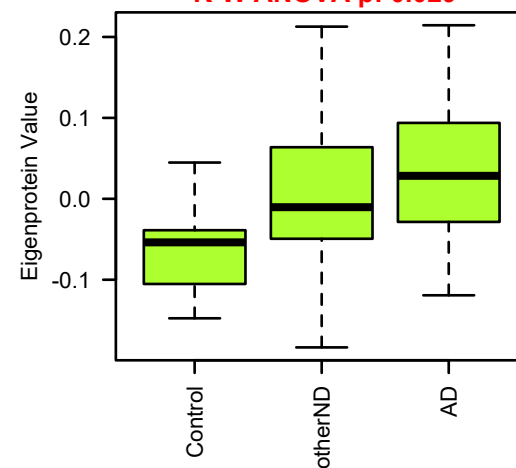

**bicor=0.27, p=0.012**  
**cor=0.25, p=0.022**

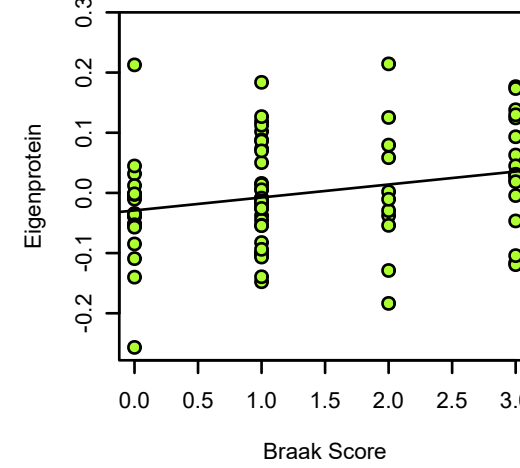

**bicor=0.0052, p=0.96**  
**cor=-0.012, p=0.91**

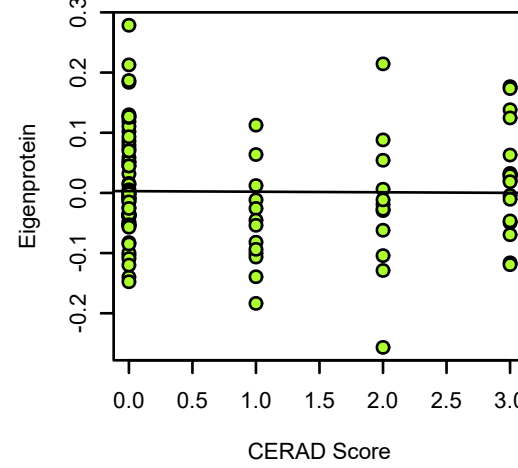

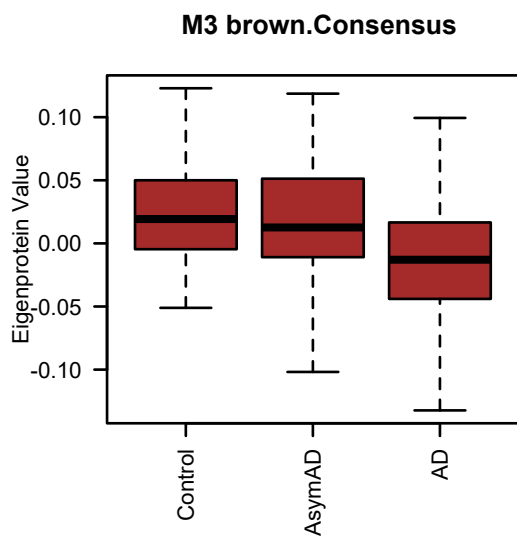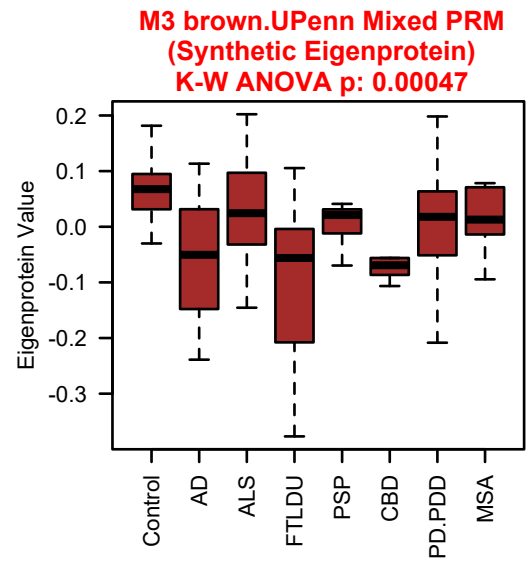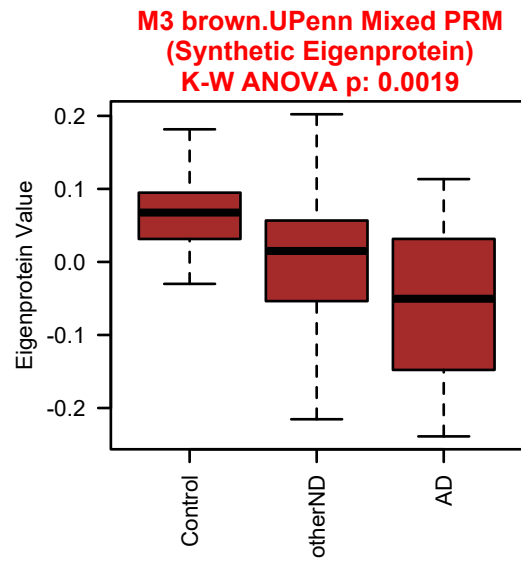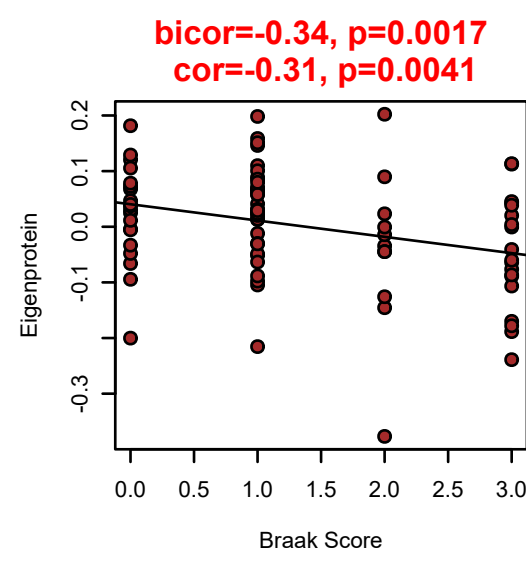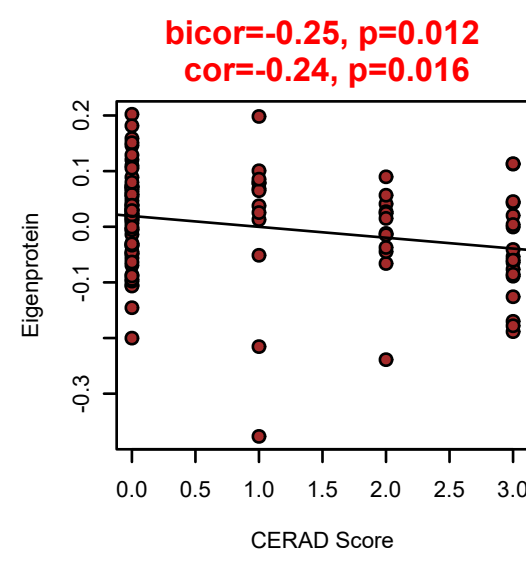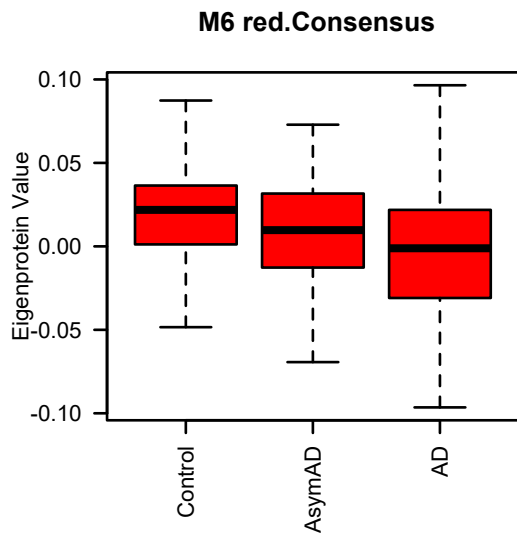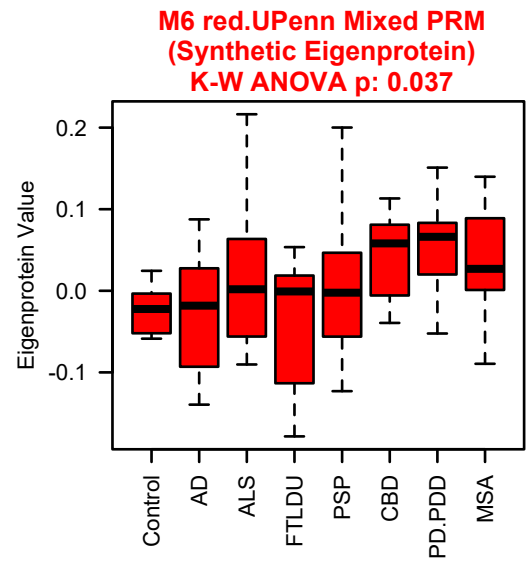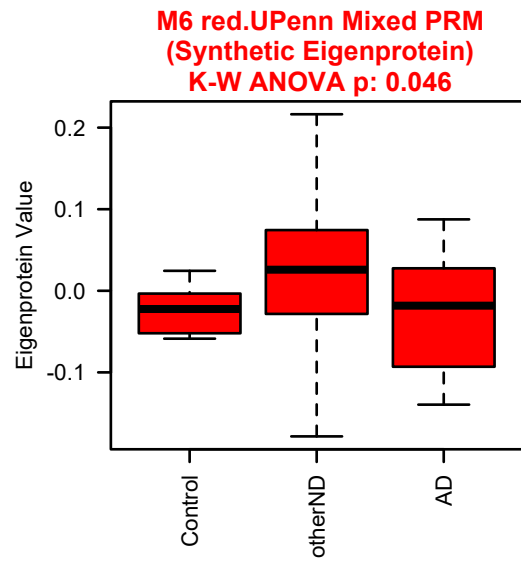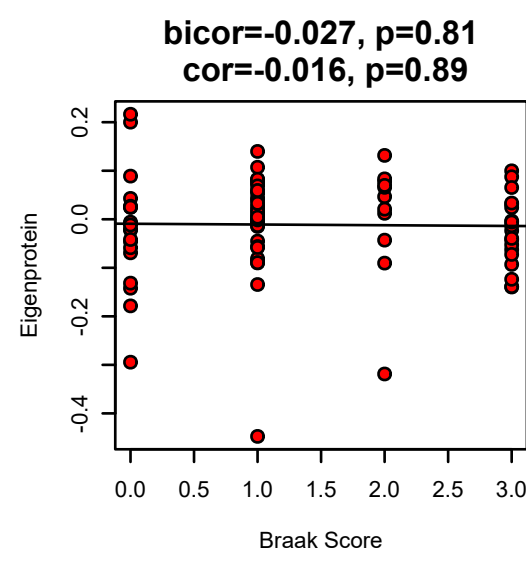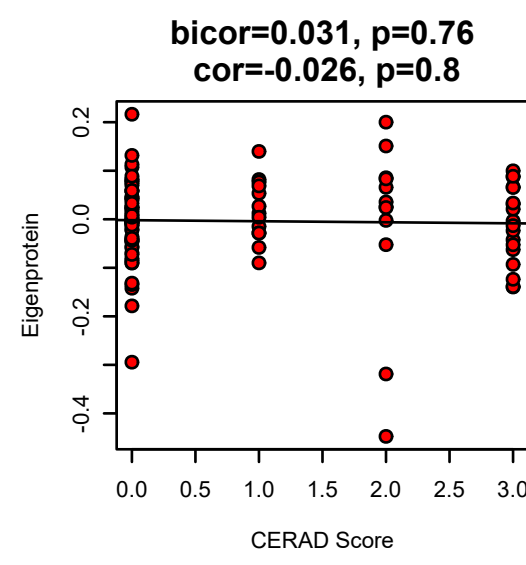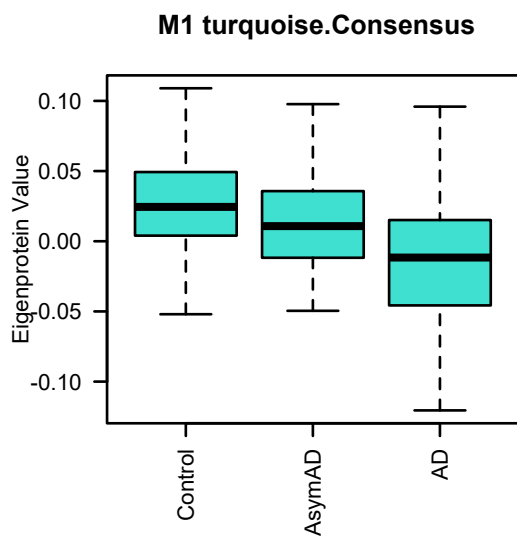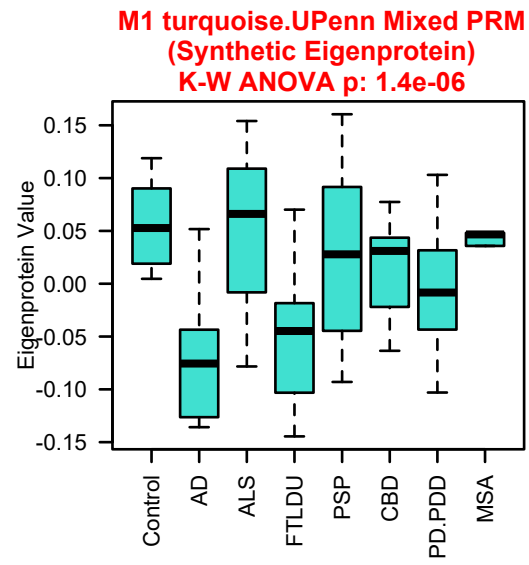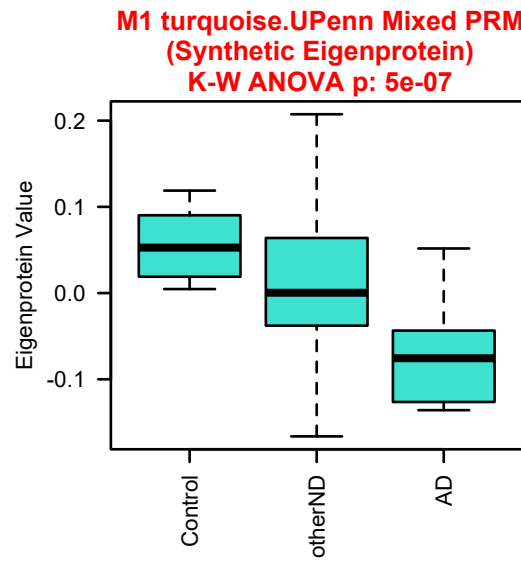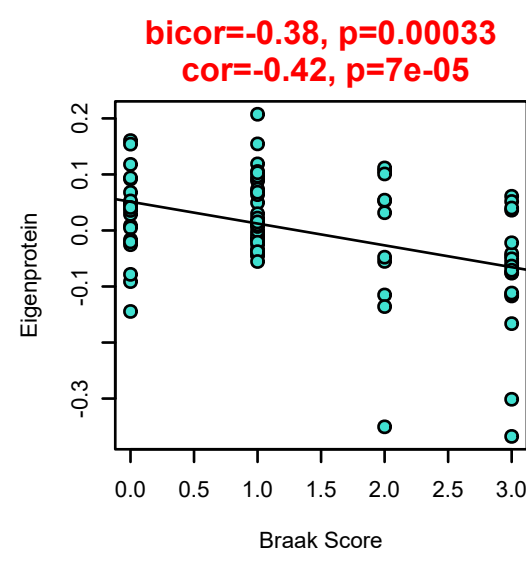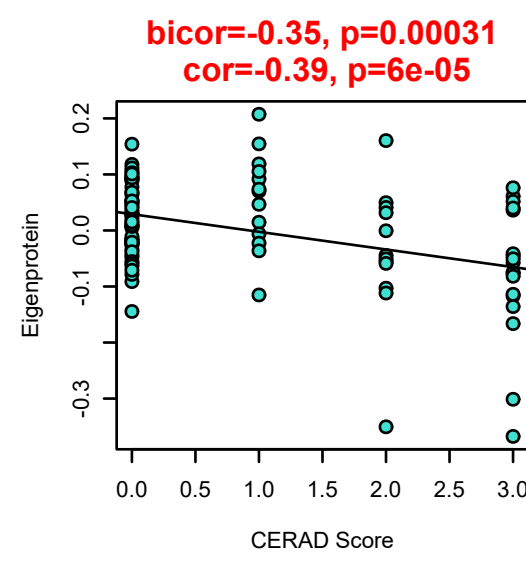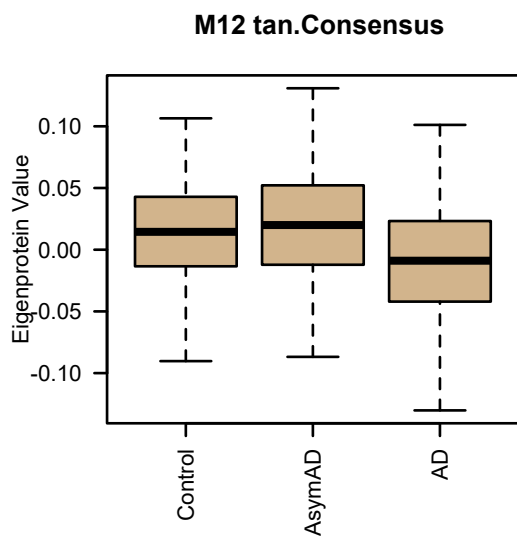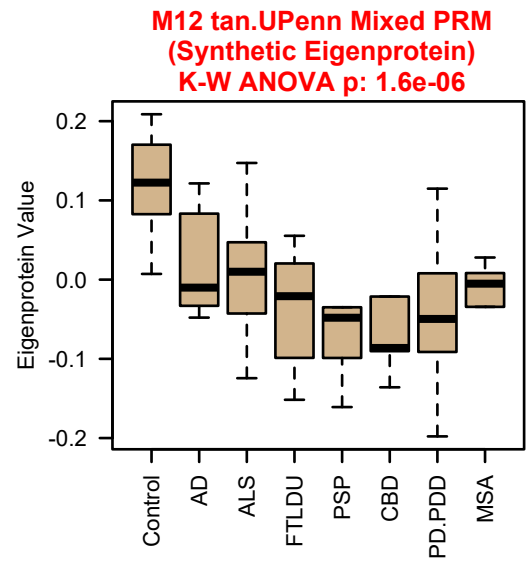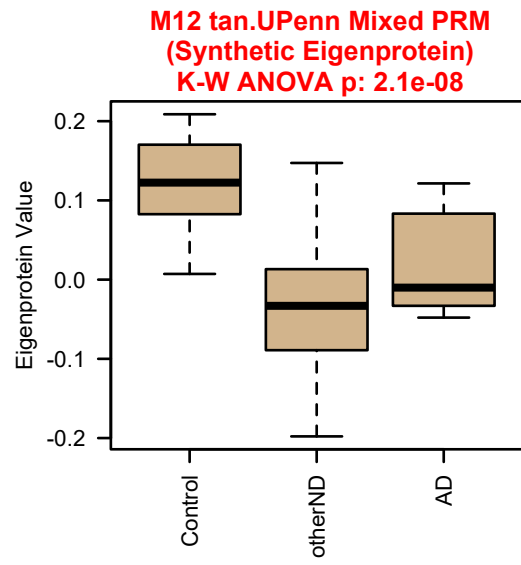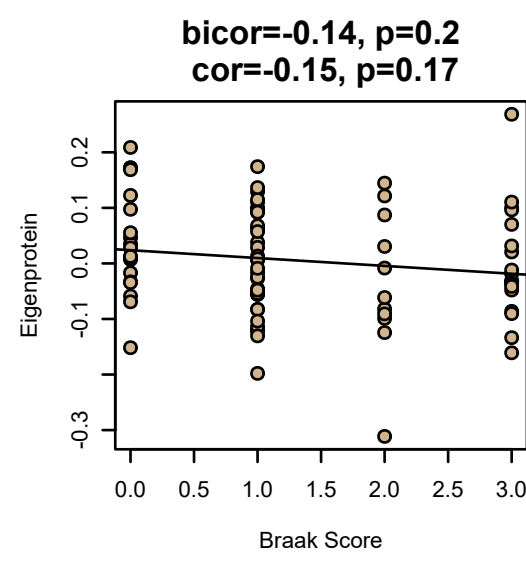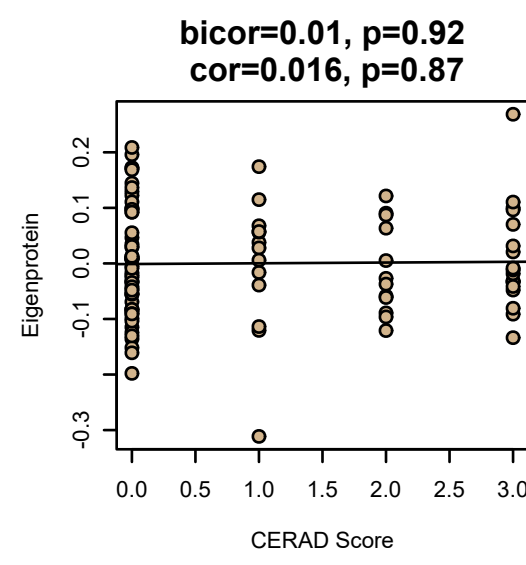

**Supplementary Figure 12. AD Network Module Changes in Other Neurodegenerative Diseases by Targeted Mass Spectrometry Measurements.** A synthetic eigenprotein for each AD network module was created from proteins measured by parallel reaction monitoring mass spectrometry (PRM) that mapped to an AD network module (see **Supplementary Table 4**). Individual protein measurements by disease group are provided in **Supplementary Figure 11**. The first boxplot for each module is the AD network eigenprotein by case status, given as reference for the second and third boxplots (control  $n=46$ , AD  $n=49$ , amyotrophic lateral sclerosis (ALS)  $n=59$ , frontotemporal lobar degeneration with TAR DNA-binding protein 43 inclusions (FTLD-TDP)  $n=29$ , progressive supranuclear palsy (PSP)  $n=27$ , corticobasal degeneration (CBD)  $n=17$ , Parkinson's disease and Parkinson's disease dementia (PD/PDD)  $n=80$ , and multiple system atrophy (MSA)  $n=23$ ). Other neurodegenerative diseases (otherND) include these non-AD diseases. Synthetic eigenproteins were correlated with CERAD and Braak scores, using both Pearson correlation (cor) and biweight midcorrelation (bicor), which is more robust to outliers. Synthetic eigenprotein differences by case status were assessed by Kruskal-Wallis (K-W) one-way ANOVA. Differences between AD and other case groups were assessed by two-sided Dunnett's test and are provided in **Supplementary Table 4**. Statistical significance at  $p < 0.05$  is highlighted in red. Boxplots represent the median, 25<sup>th</sup>, and 75<sup>th</sup> percentiles, and whiskers represent measurements to the 5<sup>th</sup> and 95<sup>th</sup> percentiles.

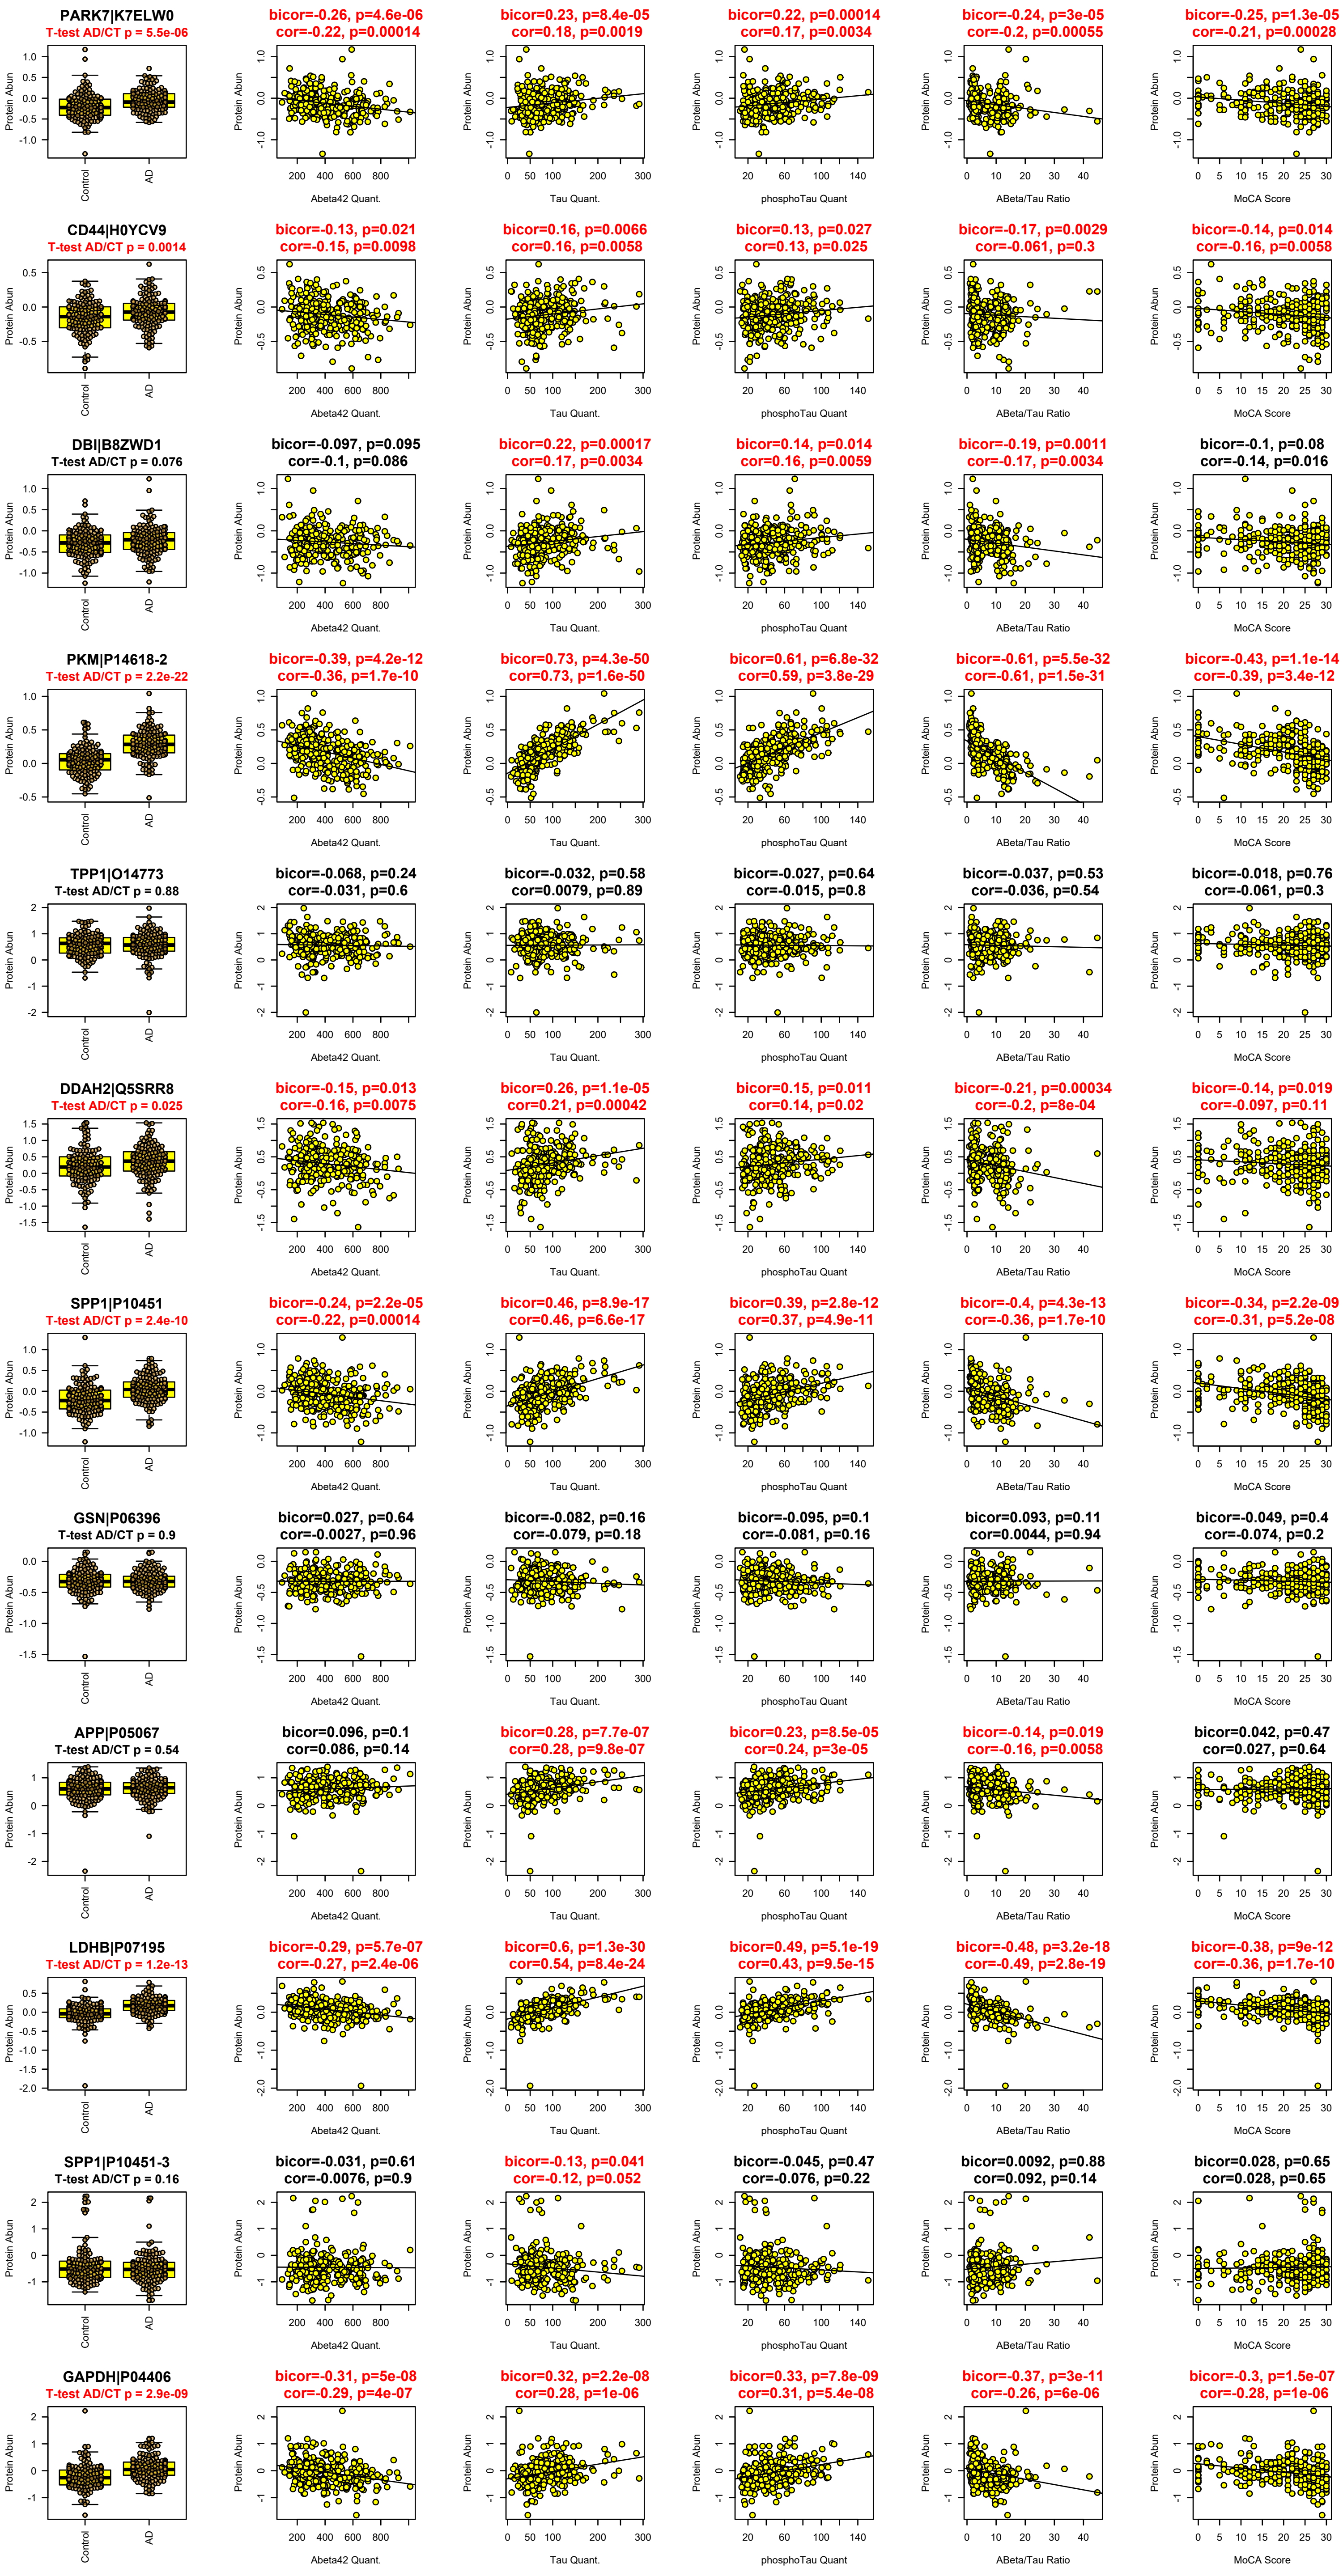



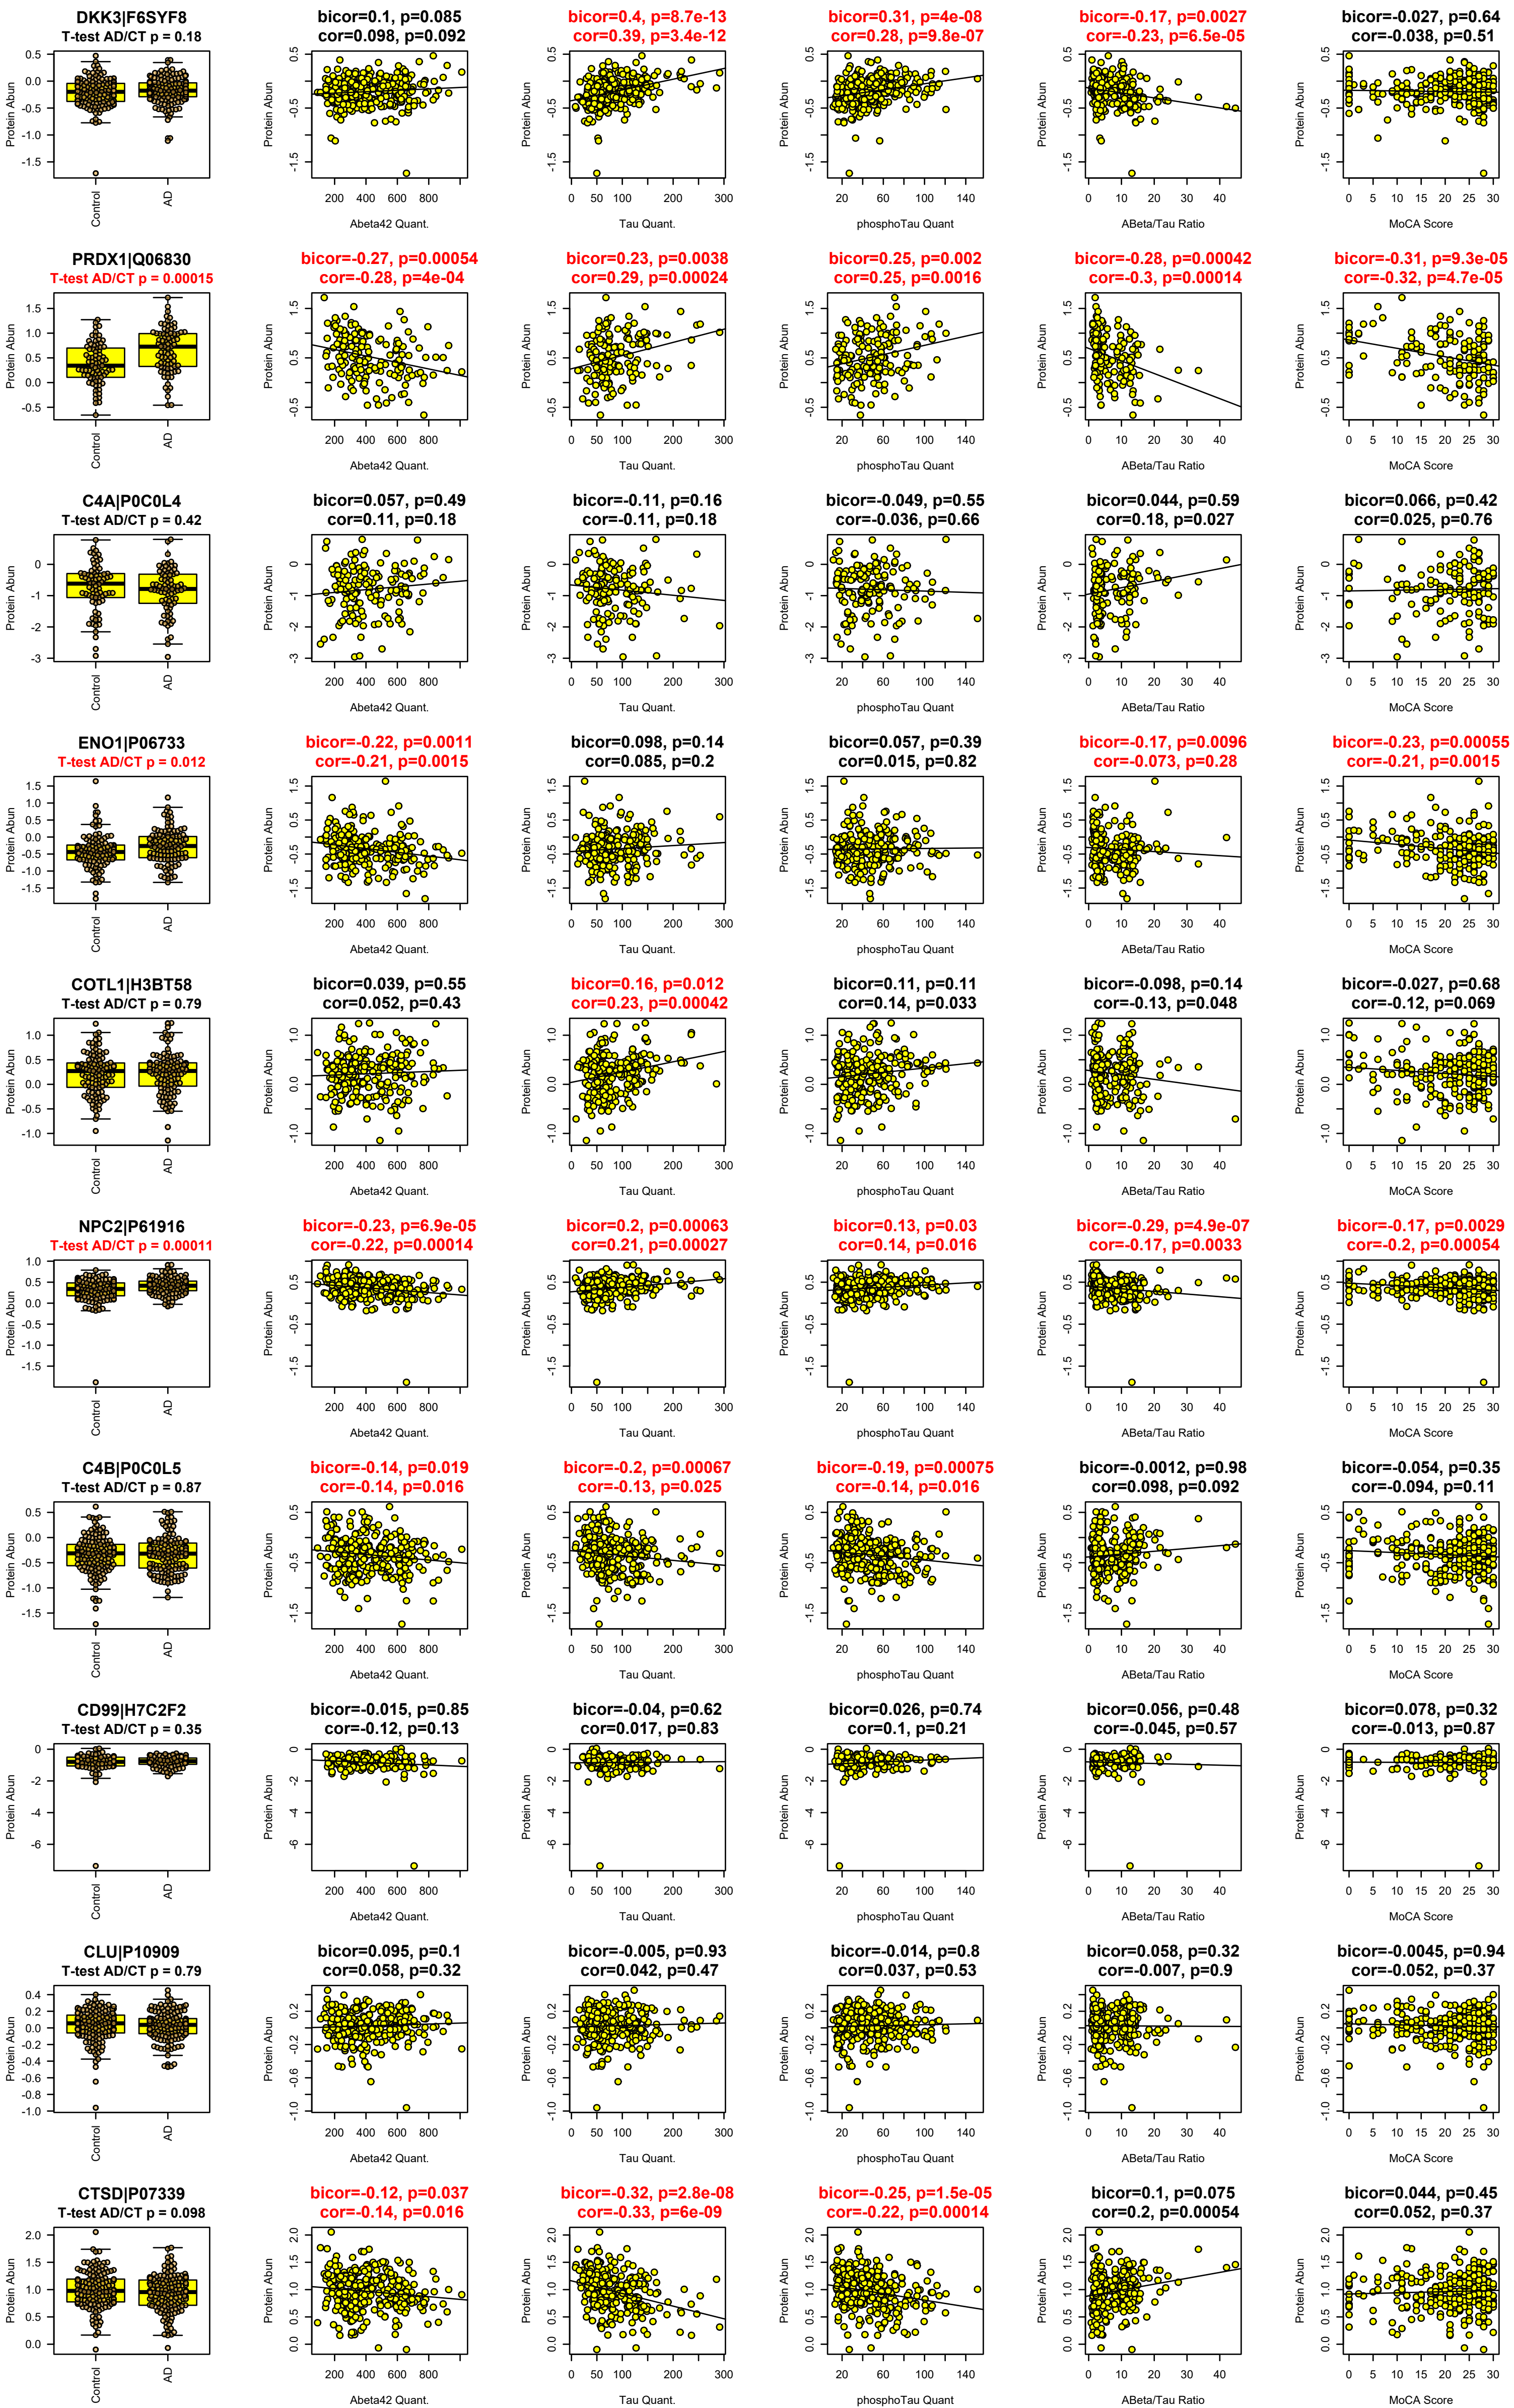

**Supplementary Figure 13. Relative Levels and Trait Correlations of Module M4 Proteins in AD CSF Cohort 1.** Relative levels of each protein were measured in control ( $n=150$  independent case samples) and AD ( $n=147$  independent case samples) CSF by tandem mass tag mass spectrometry (TMT-MS), and correlated with ELISA measurements of A $\beta$ 42, Tau, and phosphorylated tau, as well as A $\beta$ 42/Tau ratio and MoCA score. The number of missing values for each protein measurement is provided at <https://www.synapse.org/consensus>. ELISA measurements are given in pg/mL. Differences in protein levels were assessed by two-sided Welch's  $t$  test. Correlations were performed using both Pearson correlation ( $cor$ ) and biweight midcorrelation ( $bicor$ ), which is more robust to outliers. Statistical significance at  $p < 0.05$  is highlighted in red. Boxplots represent the median, 25<sup>th</sup>, and 75<sup>th</sup> percentiles, and whiskers represent measurements to the 5<sup>th</sup> and 95<sup>th</sup> percentiles. MoCA, Montreal Cognitive Assessment (higher scores represent better cognitive function).

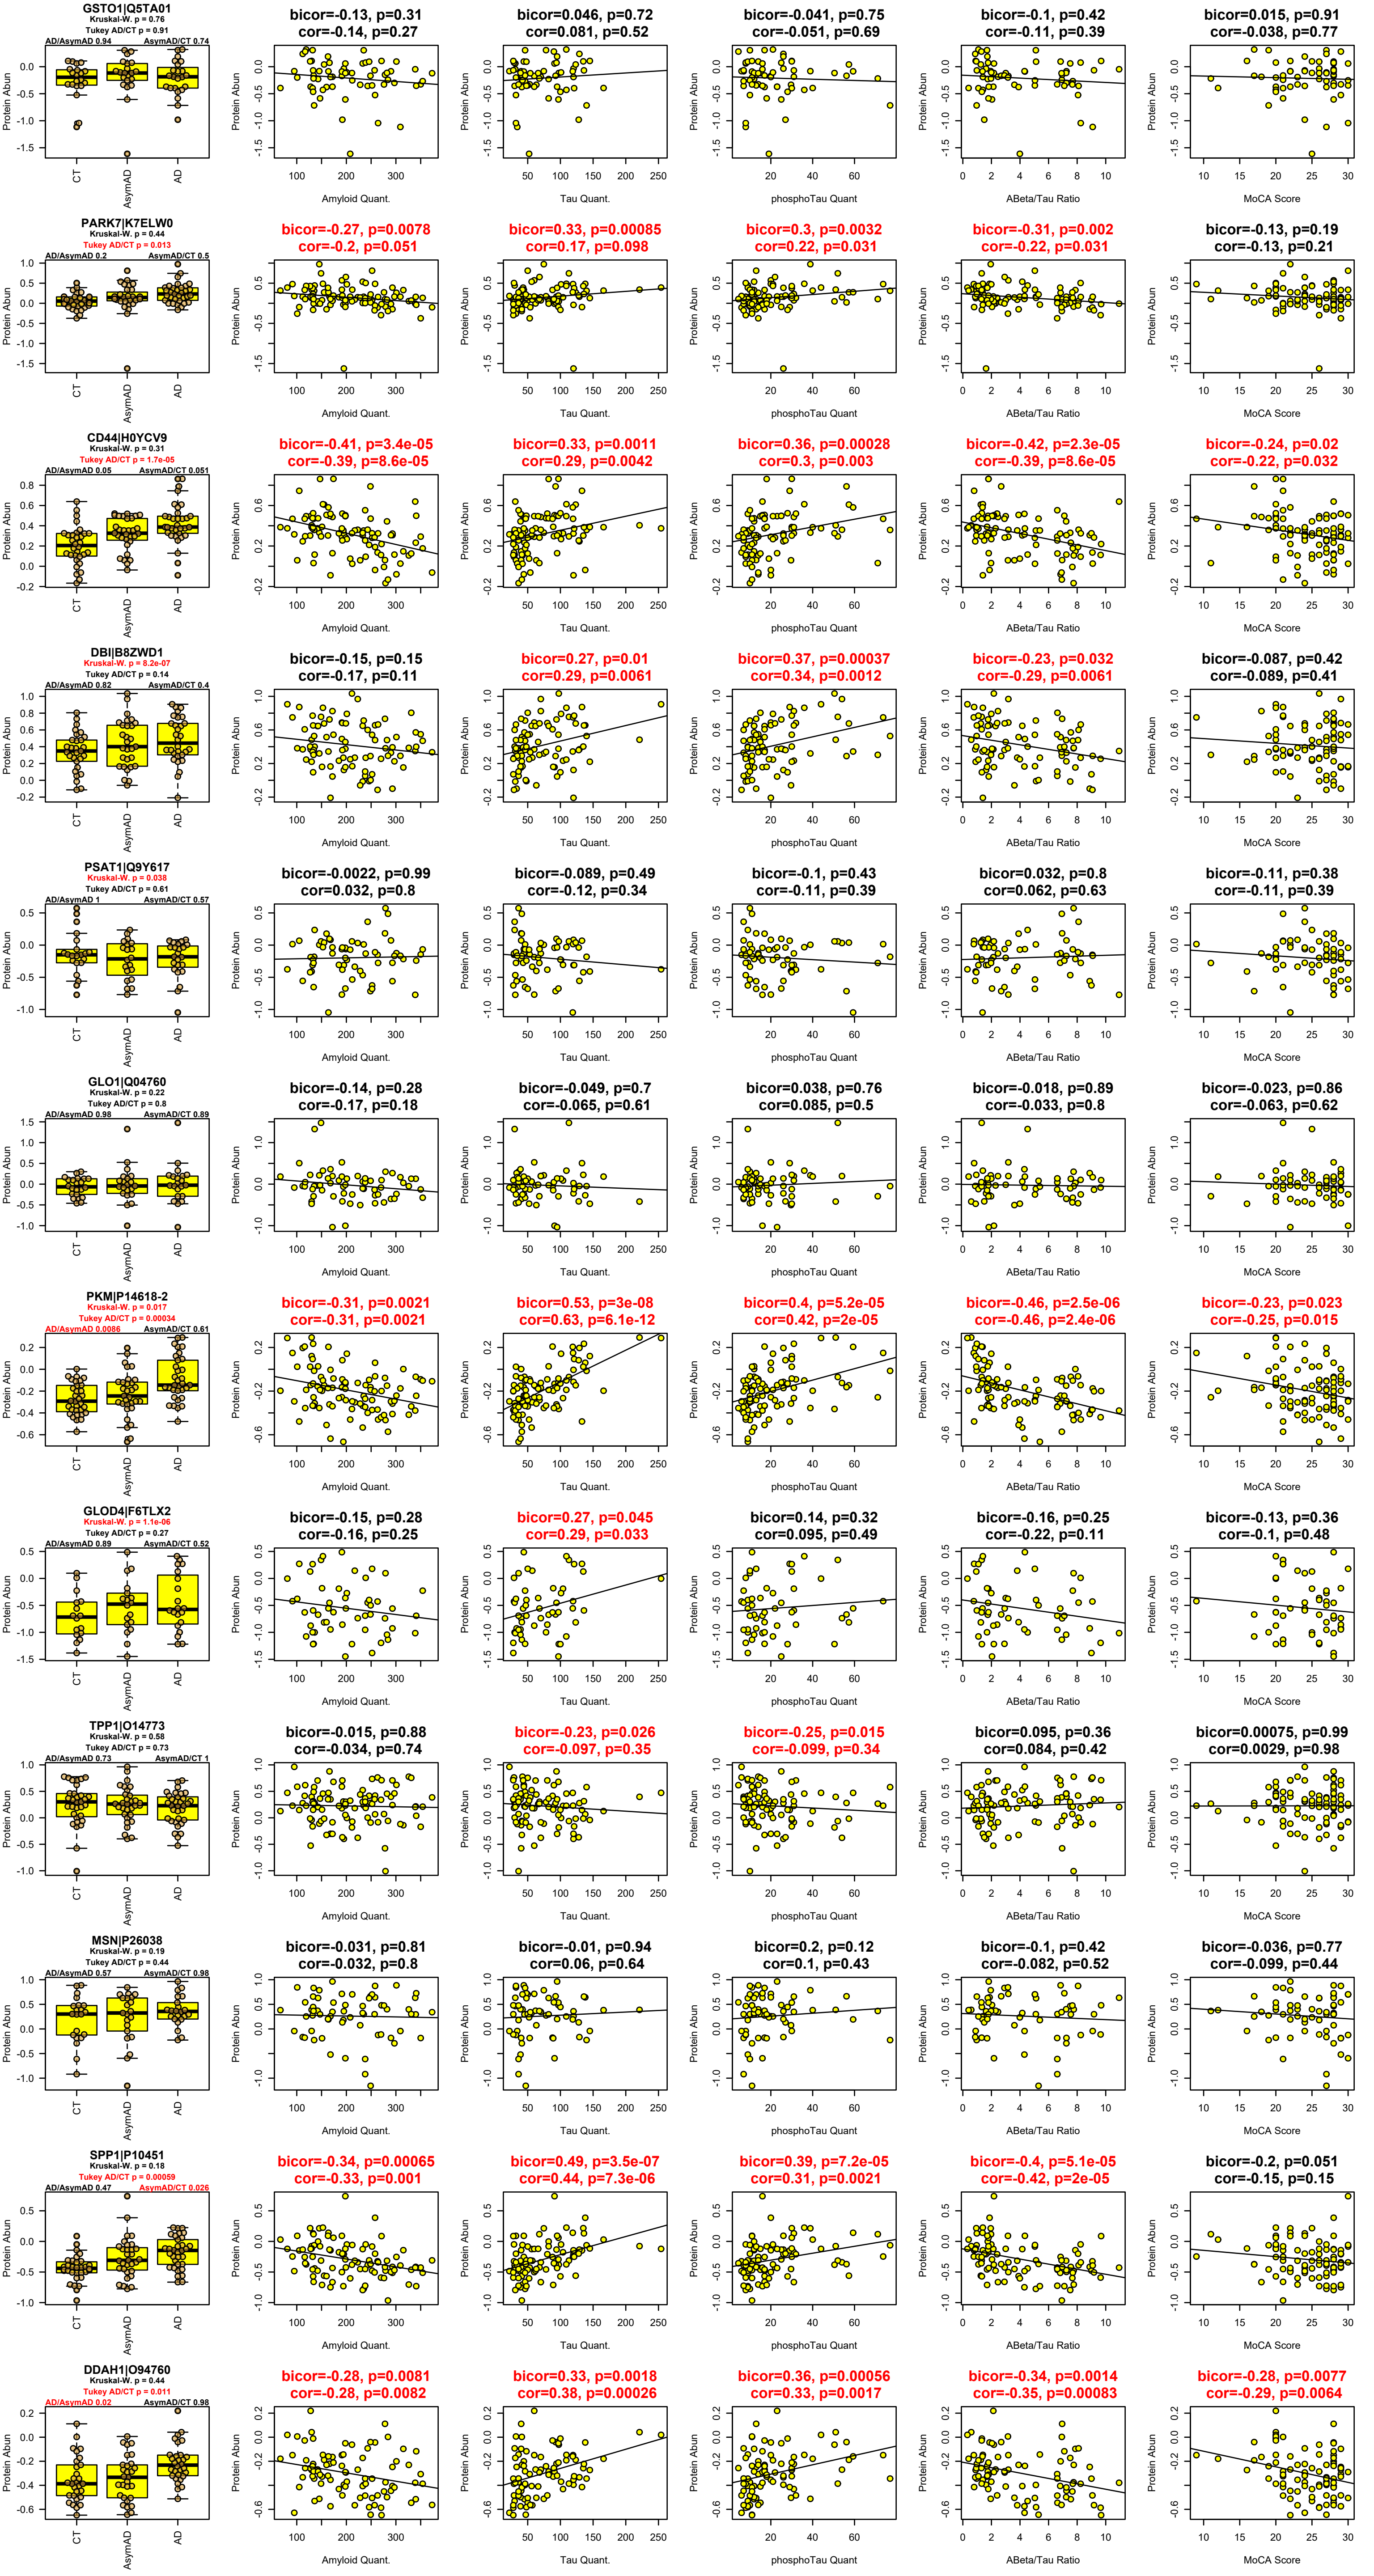

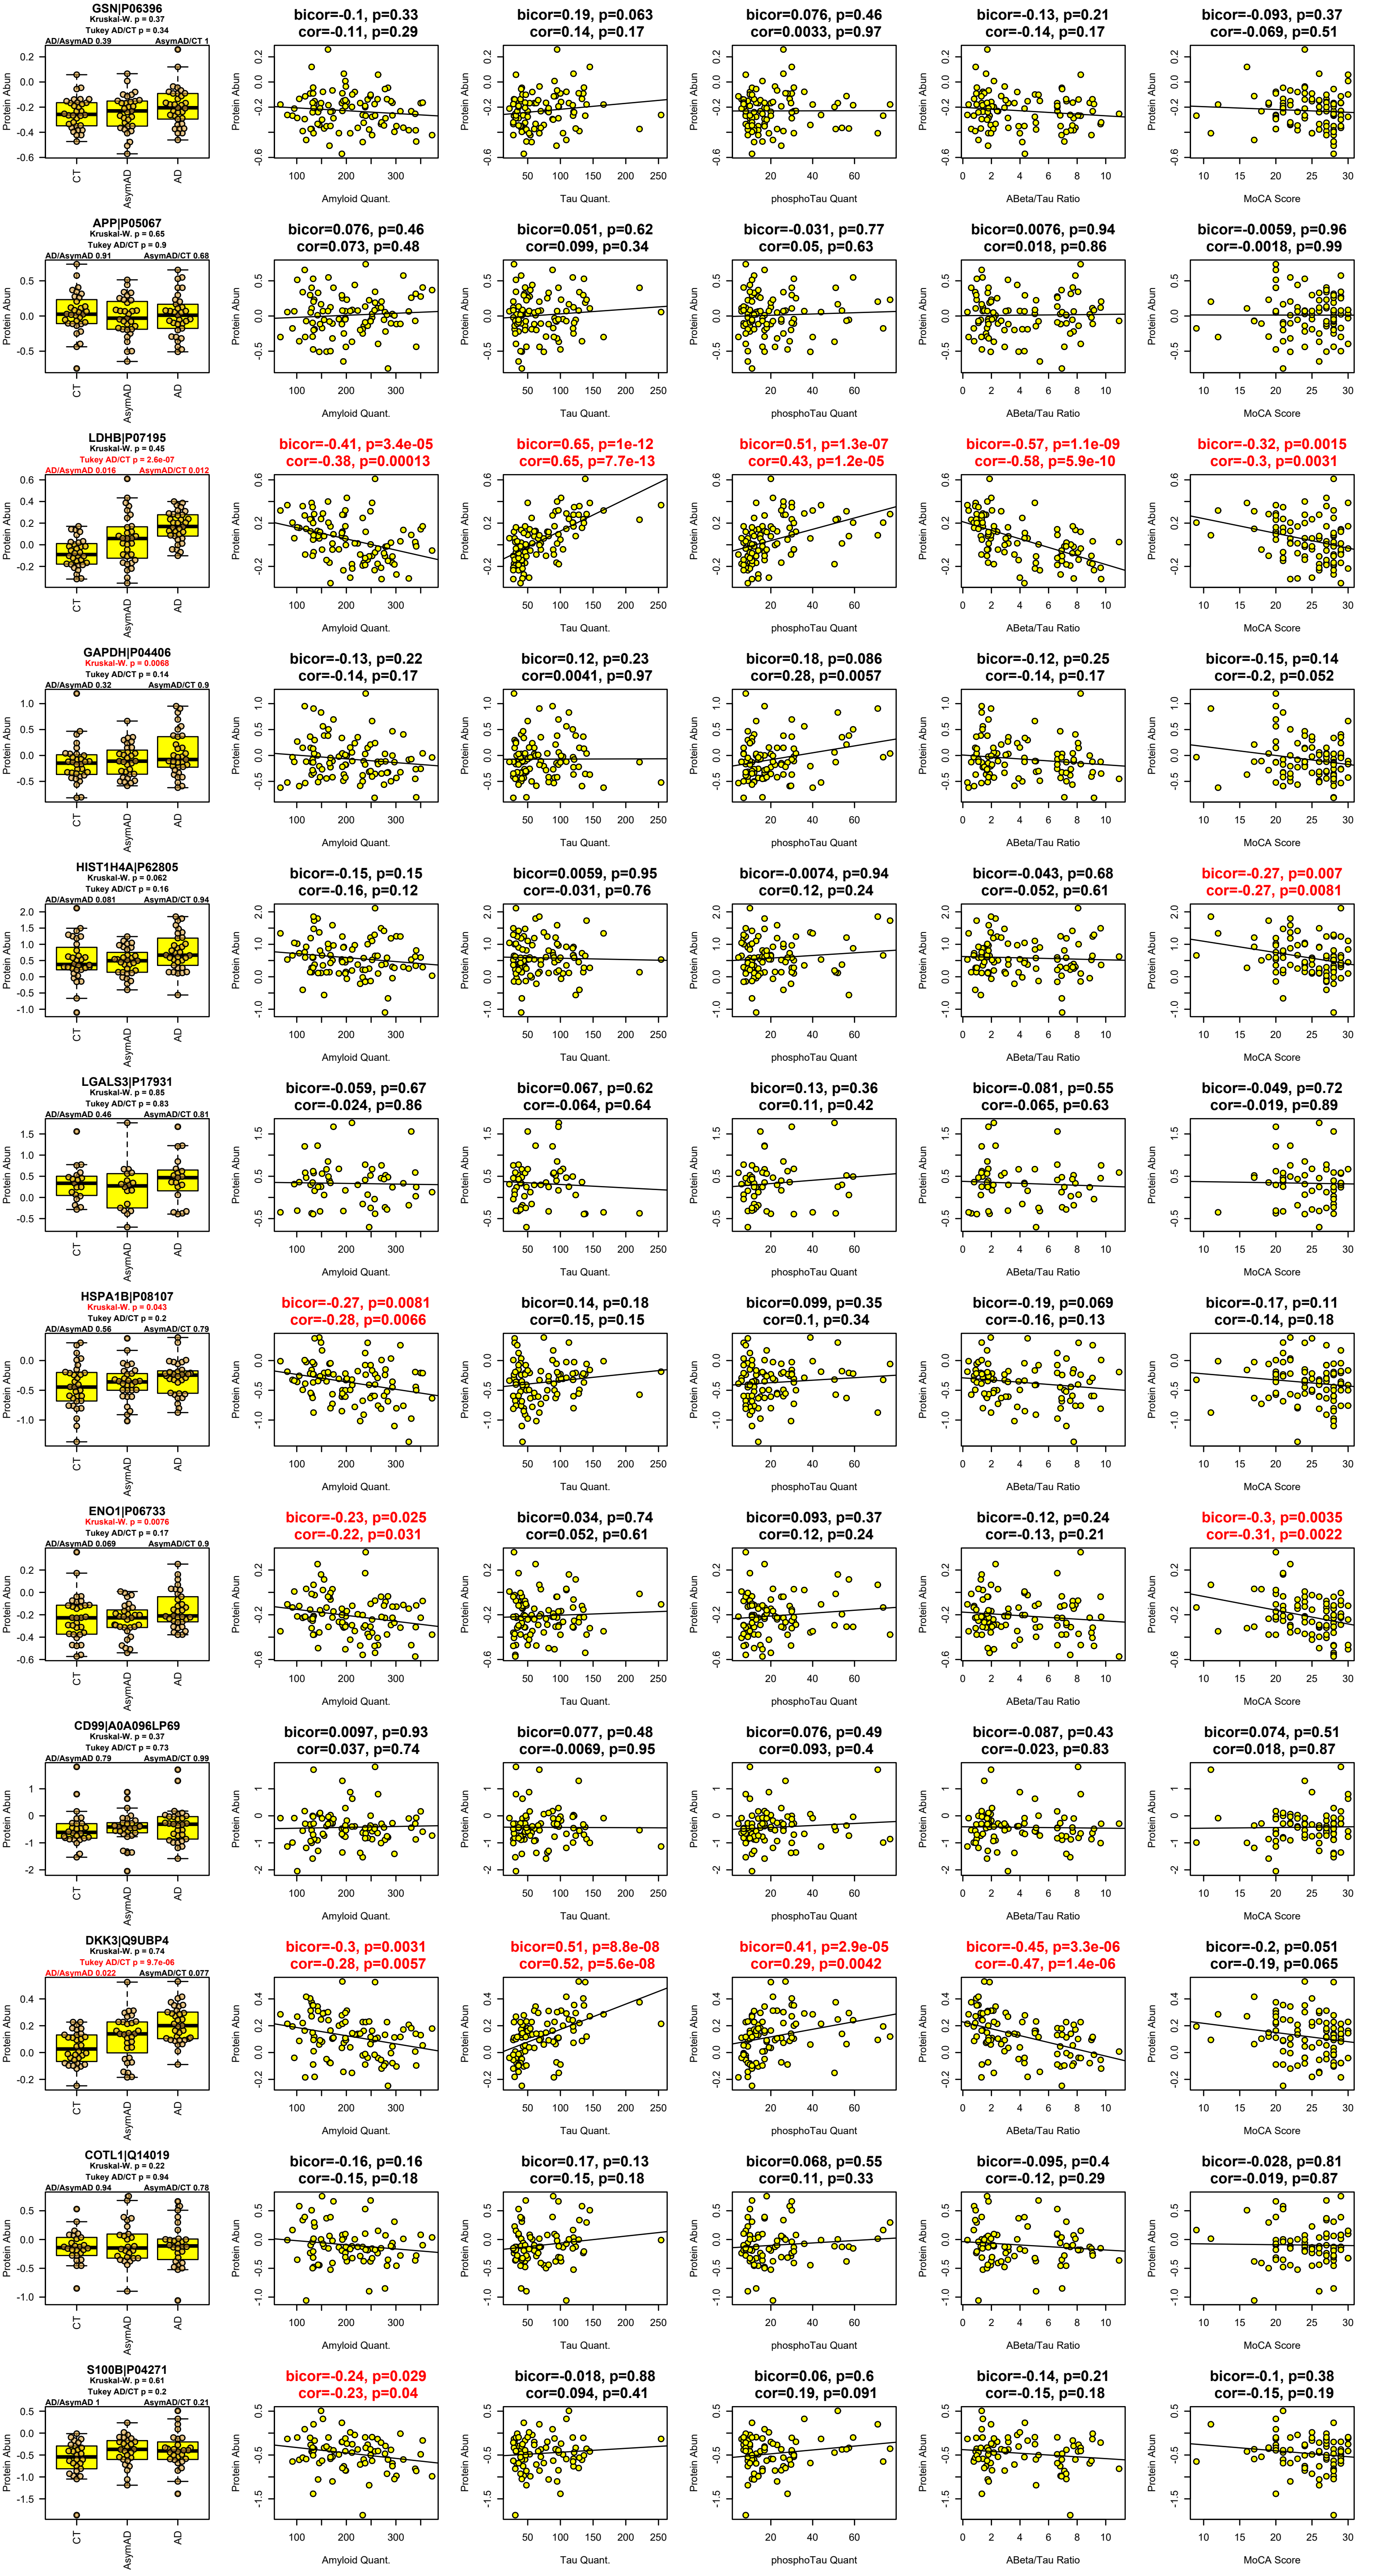

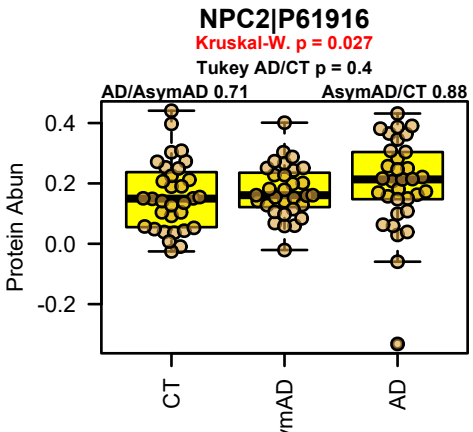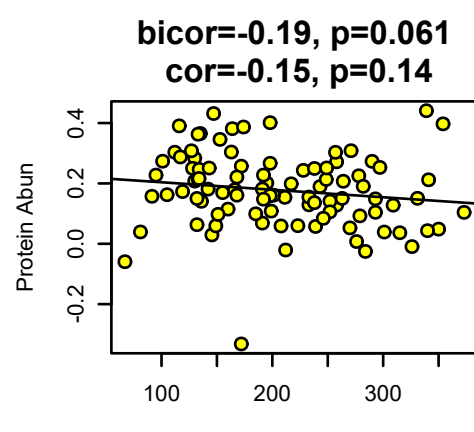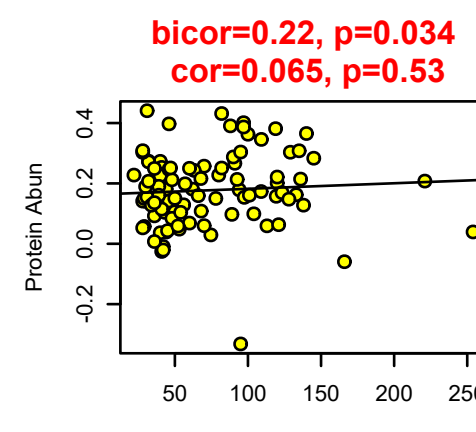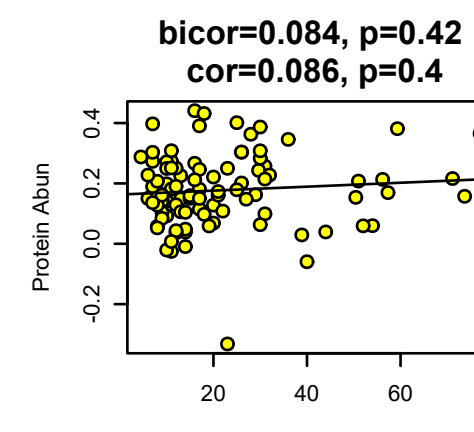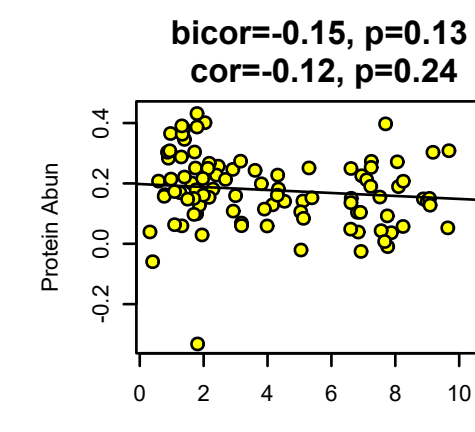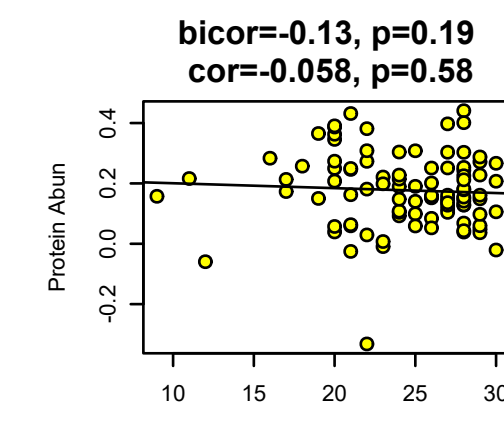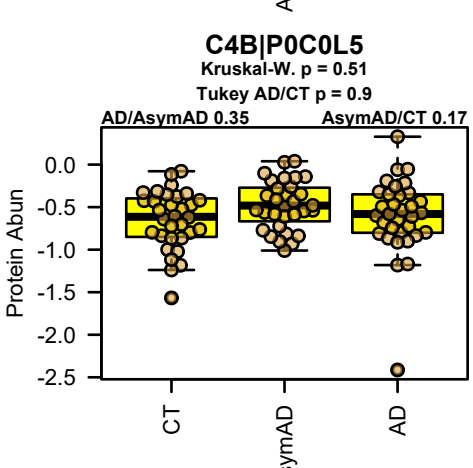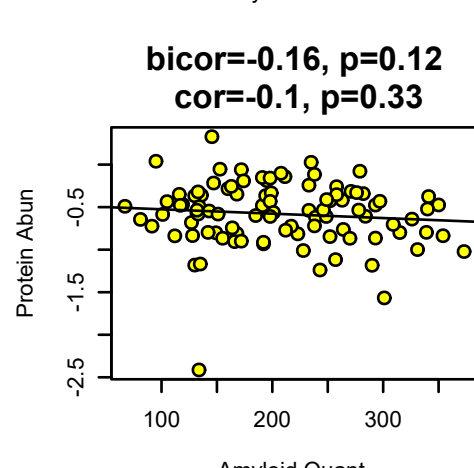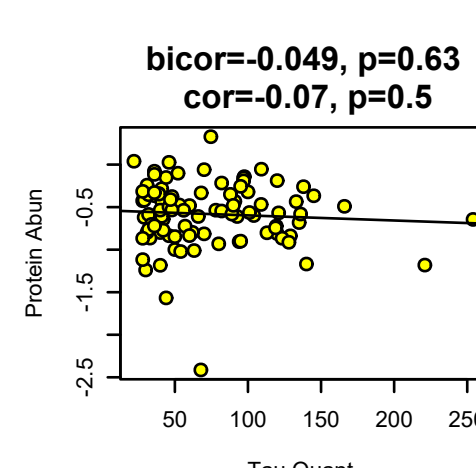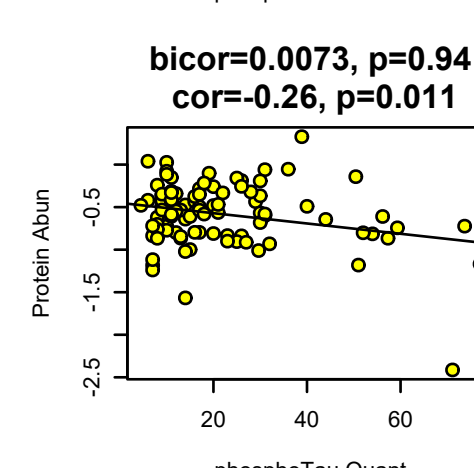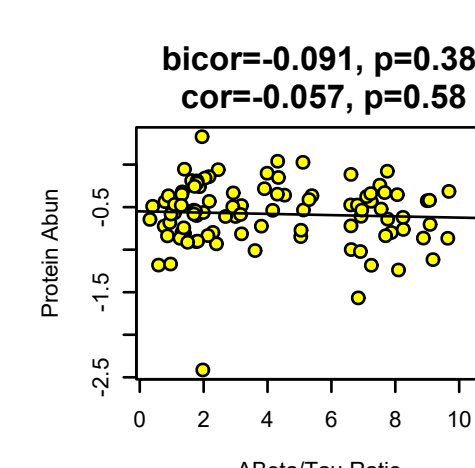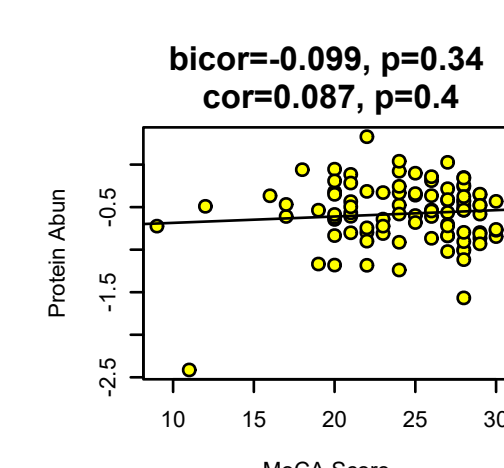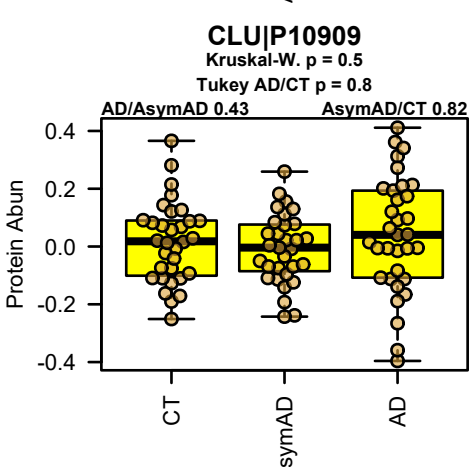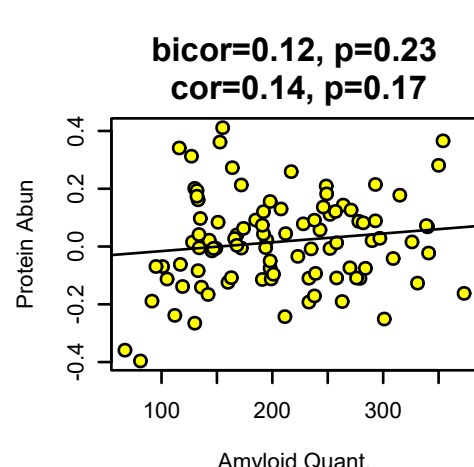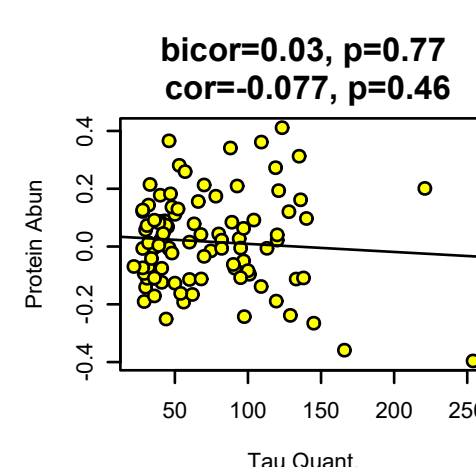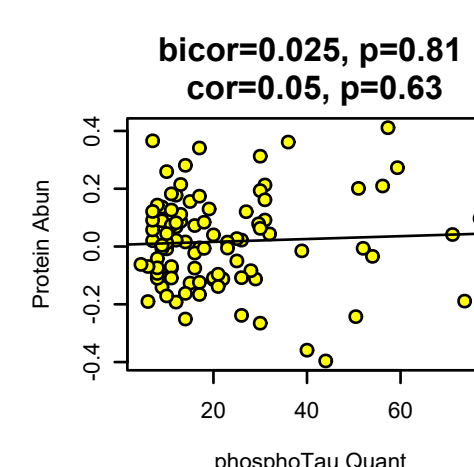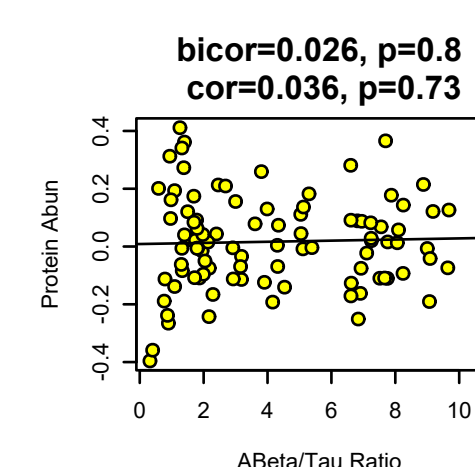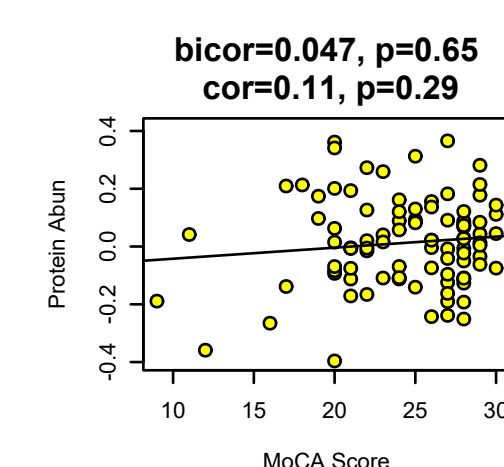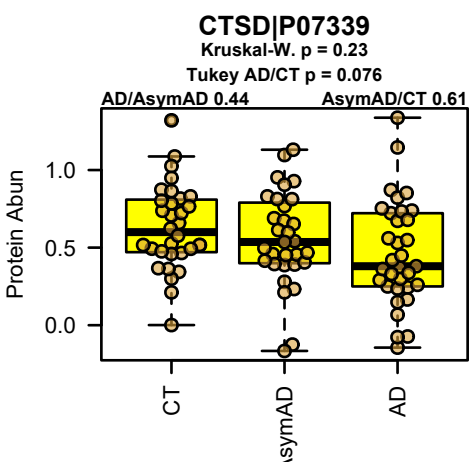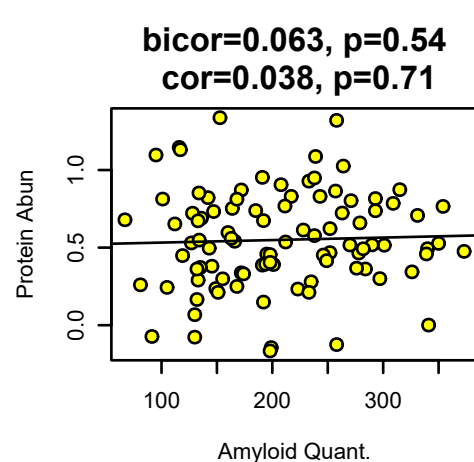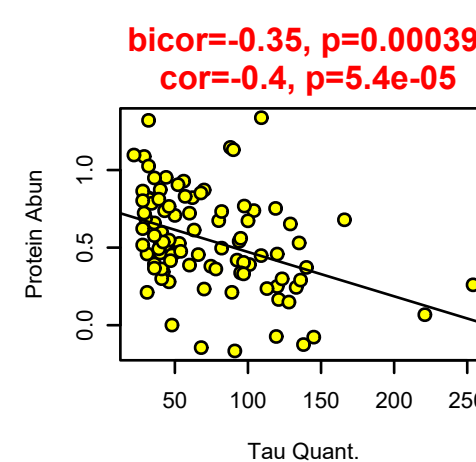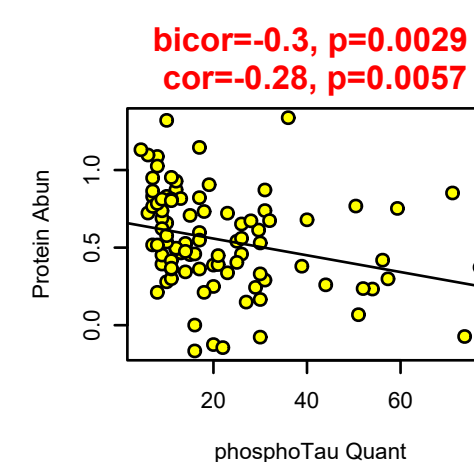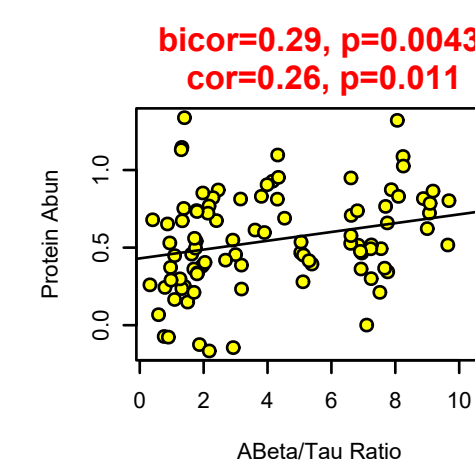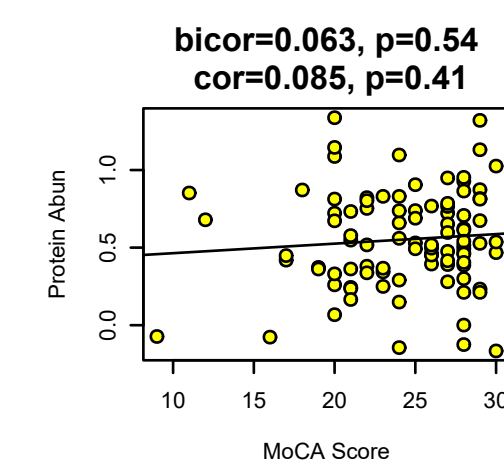

**Supplementary Figure 14. Relative Levels and Trait Correlations of Module M4 Proteins in AsymAD and AD CSF Cohort 2.** Relative levels of each protein were measured in control ( $n=32$  independent case samples), AsymAD ( $n=31$  independent case samples), and AD ( $n=33$  independent case samples) CSF by tandem mass tag mass spectrometry (TMT-MS), and correlated with ELISA measurements of A $\beta$ 42, Tau, and phosphorylated tau, as well as A $\beta$ 42/Tau ratio and MoCA score. The number of missing values for each protein measurement is provided at <https://www.synapse.org/consensus>. ELISA measurements are given in pg/mL. Differences in protein levels were assessed by Kruskal-Wallis (K-W) one-way ANOVA with Tukey test. Correlations were performed using both Pearson correlation (cor) and biweight midcorrelation (bicor), which is more robust to outliers. Statistical significance at  $p < 0.05$  is highlighted in red. Boxplots represent the median, 25<sup>th</sup>, and 75<sup>th</sup> percentiles, and whiskers represent measurements to the 5<sup>th</sup> and 95<sup>th</sup> percentiles. MoCA, Montreal Cognitive Assessment (higher scores represent better cognitive function).
